# Supplementary material for: Computational identification of bifunctional metal-modified ZSM-5 catalysts to boost methane–methanol coupling
Source: Royal Society of Chemistry journal article supplement (doi:10.1039/d2cy01758j), 2022-01-01
Supplement: d2cy01758j1.pdf [file d2cy01758j1.pdf]

***Electronic Supporting Information***

for

**Computational Identification of Bi-functional Metal-modified ZSM-5 Catalysts  
to Boost Methane-Methanol Coupling**

Mengnan Sun<sup>1,#</sup>, Xiaowa Nie<sup>1,#,\*</sup>, Xinwei Zhang<sup>2</sup>, Sirui Liu<sup>1</sup>, Chunshan Song<sup>1,3</sup>,  
Xinwen Guo<sup>1,\*</sup>

<sup>1</sup>*State Key Laboratory of Fine Chemicals, Frontier Science Center for Smart Materials, PSU-DUT*

*Joint Center for Energy Research, School of Chemical Engineering, Dalian University of*

*Technology, Dalian 116024, China*

<sup>2</sup>*Dalian Research Institute of Petroleum and Petrochemicals, SINOPEC, Dalian 116041, China*

<sup>3</sup>*Department of Chemistry, Faculty of Science, The Chinese University of Hong Kong, Shatin, NT,*

*Hong Kong, China*

**\*Corresponding Authors**

Dr. Xiaowa Nie

Email: [niexiaowa@dlut.edu.cn](mailto:niexiaowa@dlut.edu.cn)

Dr. Xinwen Guo

Email: [guoxw@dlut.edu.cn](mailto:guoxw@dlut.edu.cn)

**# These authors contributed equally to this work**

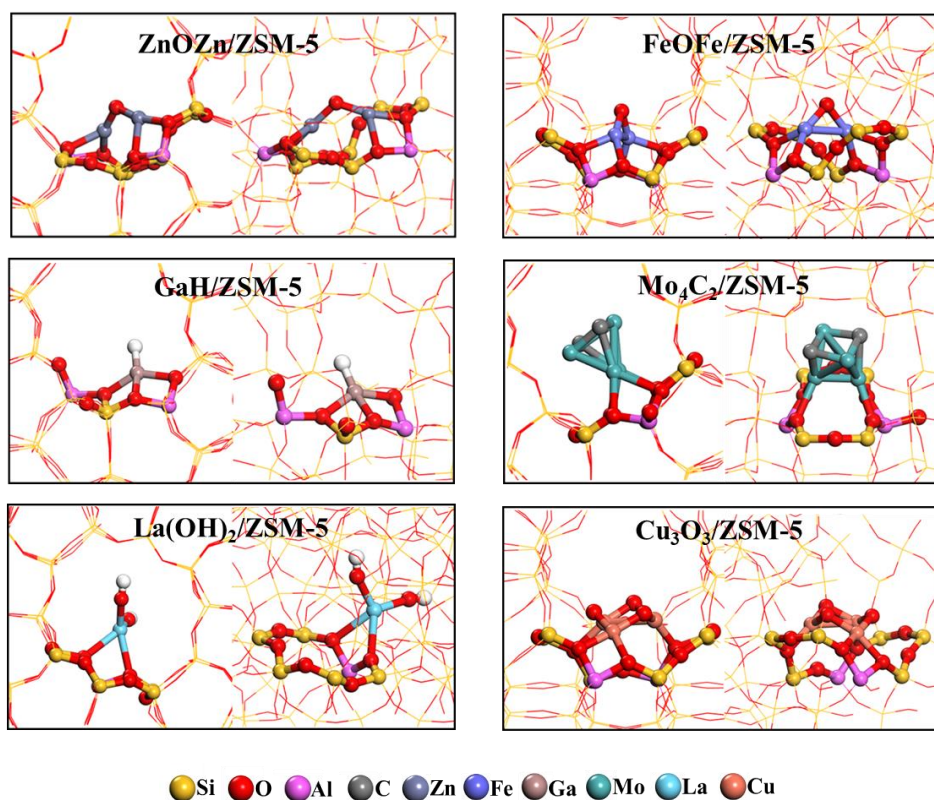

**Figure S1.** Optimized structures of active site models of M/ZSM-5 (M=Zn, Fe, Ga, Mo, La, Cu)

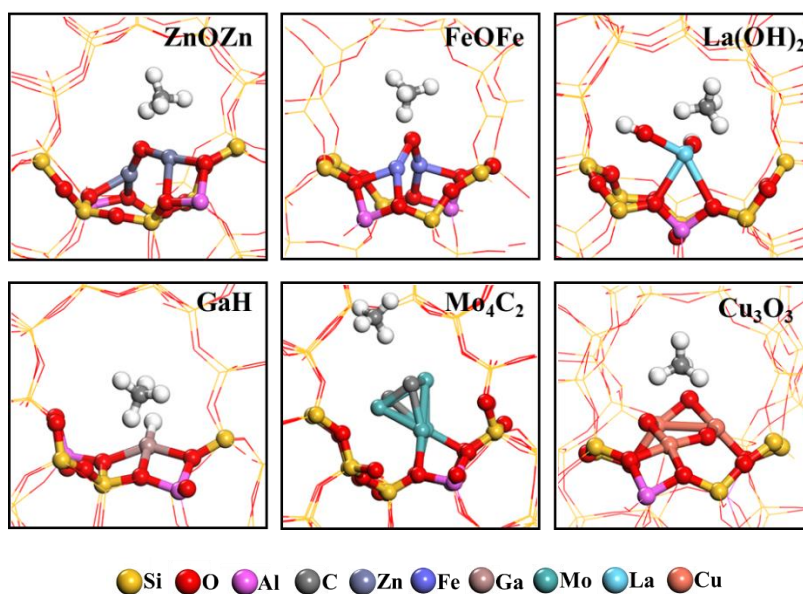

**Figure S2.** Optimized structures of methane adsorption over M/ZSM-5 (M=Zn, Fe, Ga, Mo, La, Cu).

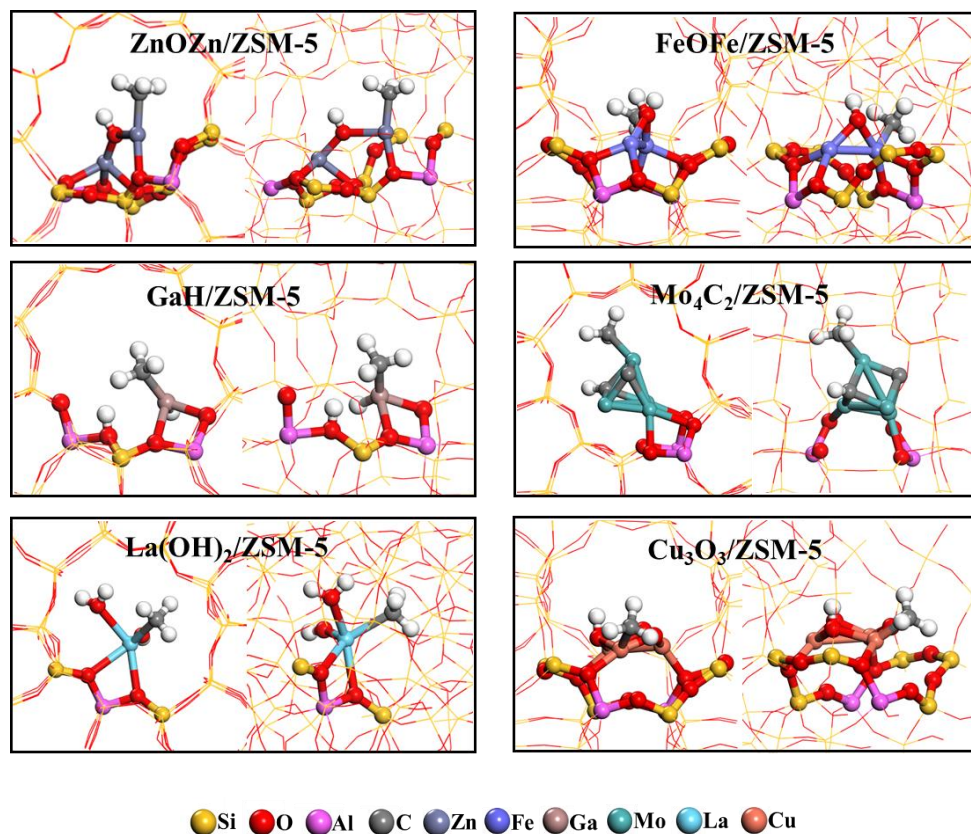

**Figure S3.** Optimized final state structures of methane activation via C-H bond cleavage over M/ZSM-5 (M=Zn, Fe, Ga, Mo, La, Cu).

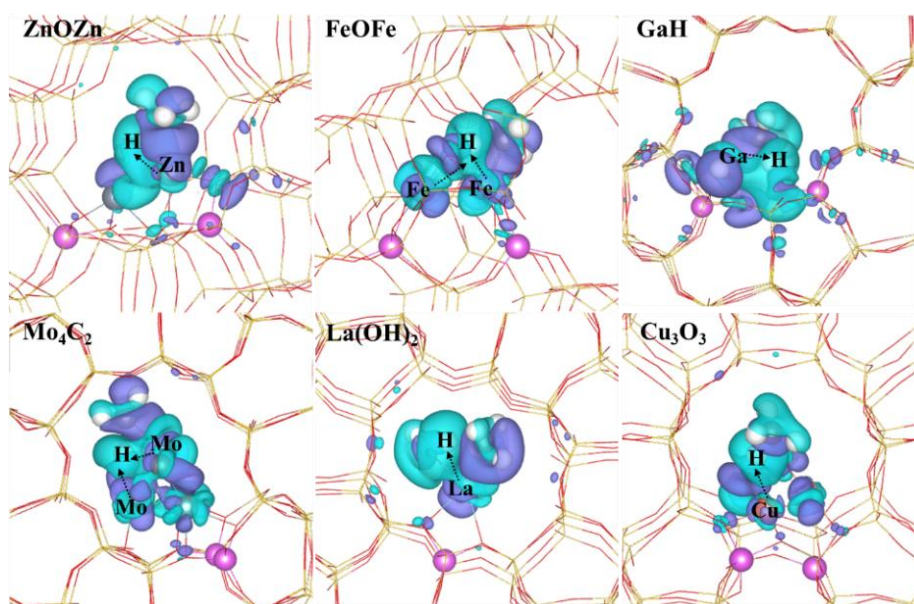

**Figure S4.** The charge density difference maps of the transition state for methane activation over M/ZSM-5 (M=Zn, Fe, Ga, Mo, La, Cu).

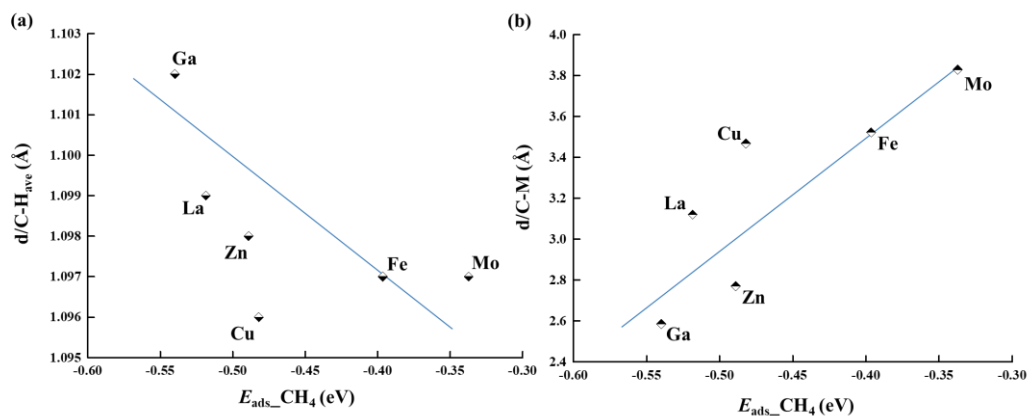

**Figure S5.** The relationship between methane adsorption energy versus (a) the average C-H bond length of methane and (b) the C-M interatomic distance in adsorbed methane over M/ZSM-5 (M=Zn, Fe, Ga, Mo, La, Cu).

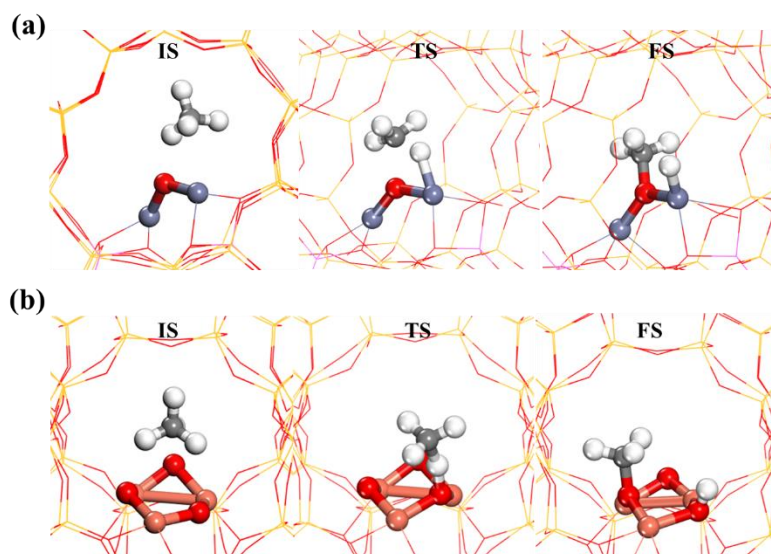

**Figure S6.** Optimized structures of adsorption state, transition state, and final state for methane C-H bond activation to form  $\text{O}_M\text{-CH}_3$  species over Zn/ZSM-5 and Cu/ZSM-5.

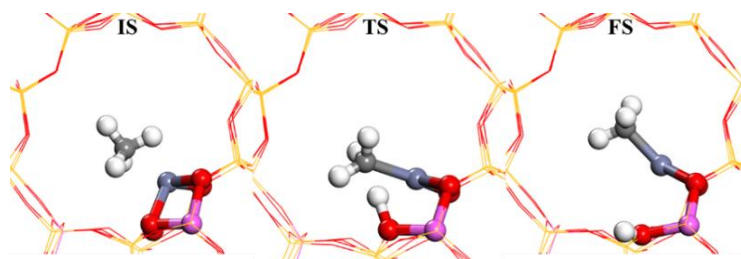

**Figure S7.** Optimized structures of adsorption state, transition state, and final state for methane C-H bond activation over  $\text{Zn}^{2+}/\text{ZSM-5}$  catalyst model.

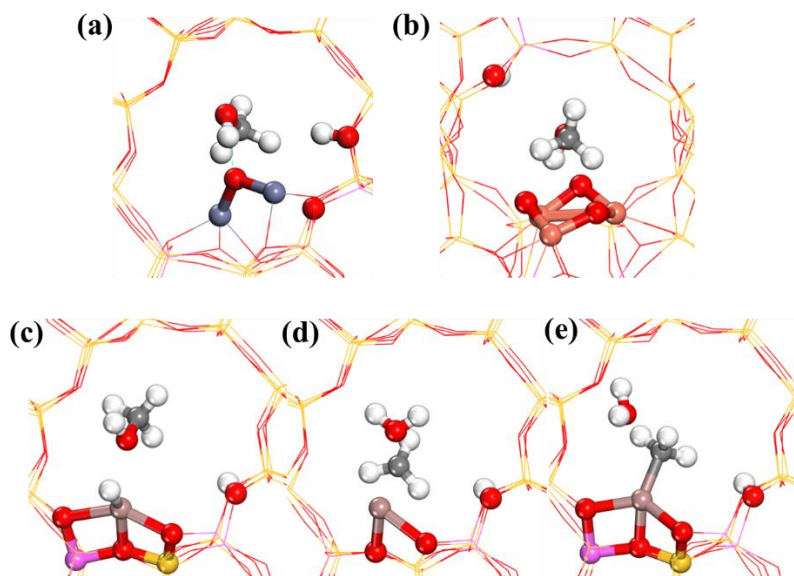

**Figure S8.** Optimized structure of methanol adsorption state over the metal-Lewis site of (a) Zn/ZSM-5, (b) Cu/ZSM-5, and (c) Ga/ZSM-5; optimized structures of (d) transition state and (e) final state for methanol activation via dehydration over the metal-Lewis site of Ga/ZSM-5.

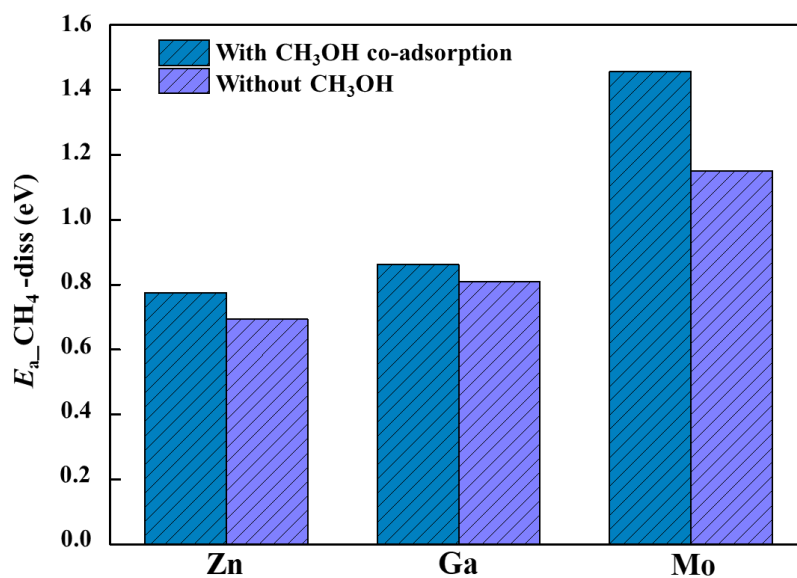

**Figure S9.** Comparison of activation barriers for methane C-H bond activation without and with methanol co-adsorption nearby over Zn/ZSM-5, Ga/ZSM-5, and Mo/ZSM-5.

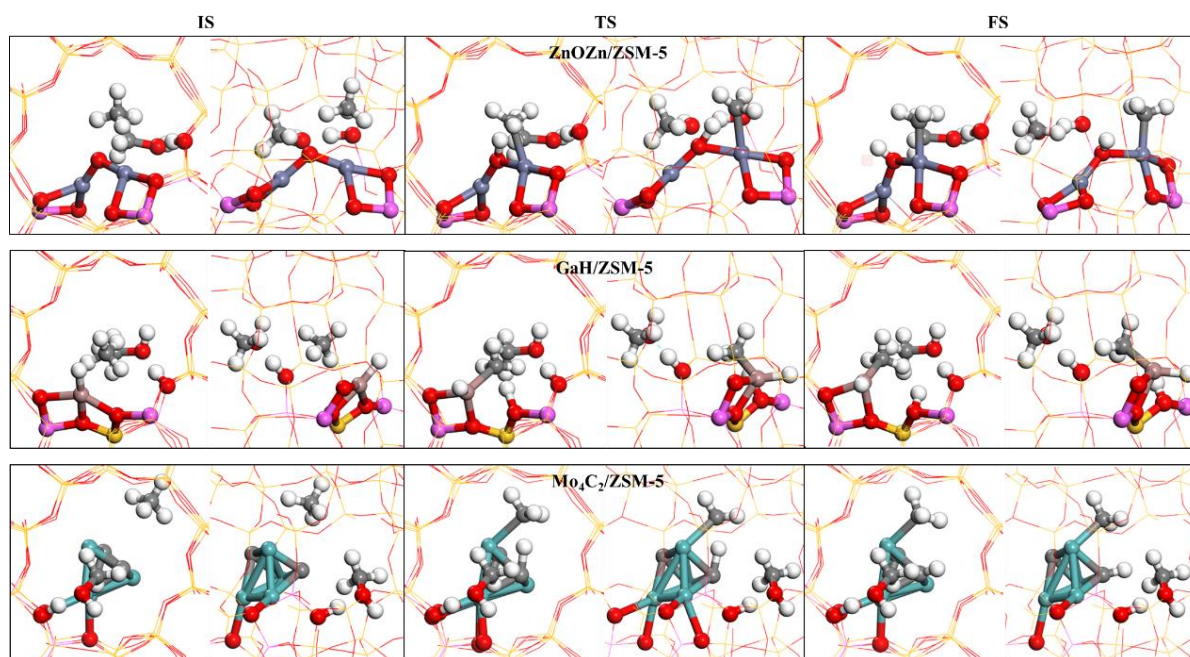

**Figure S10.** Optimized structures of adsorption state, transition state, and final state for methane activation with methanol co-adsorption nearby over Zn/ZSM-5, Ga/ZSM-5, and Mo/ZSM-5.

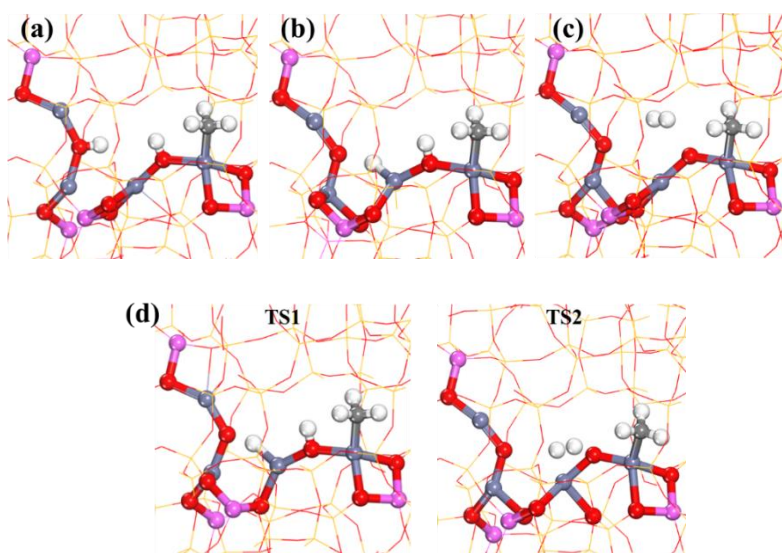

**Figure S11.** (a), (b), (c) Optimized intermediate structures, (d) optimized transition state structures for H atom on O-site of  $[\text{ZnOZn}]^{2+}/\text{ZSM-5}$  transfer to Zn-site and then form  $\text{H}_2$  molecule.

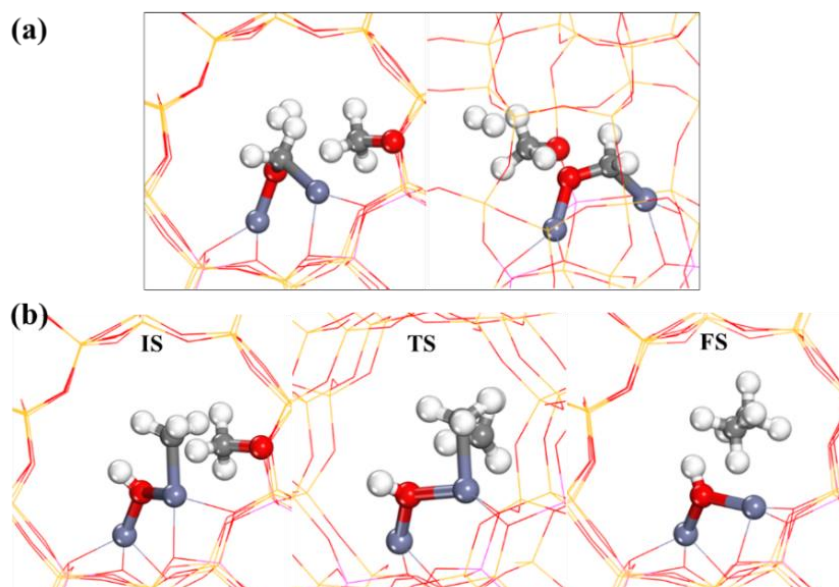

**Figure S12.** (a) Optimized final state structure of H(O<sub>Zn</sub>) and H atom dissociated from Zn-CH<sub>3</sub> to form H<sub>2</sub>, (b) optimized structures for C-C coupling to form C<sub>2</sub>H<sub>6</sub> of Zn-CH<sub>3</sub> and O-CH<sub>3</sub> in the presence of H(O<sub>Zn</sub>) over Zn/ZSM-5.

(*Note:* In addition, we investigated the case that the H(O<sub>Zn</sub>) atom generated by methane activation participates in subsequent C-C coupling reaction without removal, and the optimized structures are shown in **Figure S12**. **Figure S12(a)** shows the final state structure of H(O<sub>Zn</sub>) and H atom dissociated from Zn-CH<sub>3</sub> species to form H<sub>2</sub> molecule. It can be clearly seen that the C atom in the final state structure of Zn-CH<sub>2</sub> bonds to the O<sub>Zn</sub> atom of [ZnOZn]<sup>2+</sup> after H<sub>2</sub> generation, which destroyed the original active site structure of [ZnOZn]<sup>2+</sup>. Since the C atom of Zn-CH<sub>2</sub>-O bonds to Zn and O atoms at the same time, the barrier of subsequent C-C coupling with O<sub>fra</sub>-CH<sub>3</sub> species should be high, which is impossible to occur. We also considered another possible route, which is that the Zn-CH<sub>3</sub> and O<sub>fra</sub>-CH<sub>3</sub> directly go through C-C coupling to form C<sub>2</sub>H<sub>6</sub> in the presence of a H(O<sub>Zn</sub>) nearby, as shown in **Figure S12(b)**. The DFT calculation results show that the activation barrier of this step is 2.27eV, which is much higher than the barrier (1.56 eV) of H transfer from the bridging O<sub>Zn</sub> of [ZnOZn]<sup>2+</sup> to form H<sub>2</sub> then desorb. To sum up, our calculation results reveal that the H atom on the bridging O<sub>Zn</sub> site preferentially transfers to form H<sub>2</sub> then desorb from the active site, so that the bridging O<sub>Zn</sub> site of [ZnOZn]<sup>2+</sup> can be regenerated for subsequent C-C coupling reactions.)

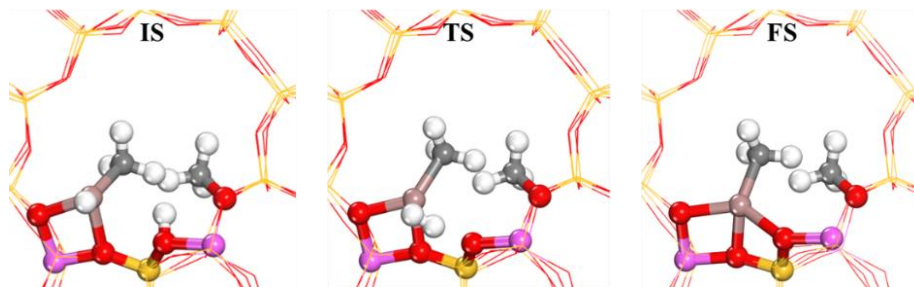

**Figure S13.** Optimized structures of initial state, transition state, and final state for  $H(O_{\text{fra}})$  and  $H(\text{Ga})$  to form  $H_2$  over  $\text{Ga}/\text{ZSM-5}$ .

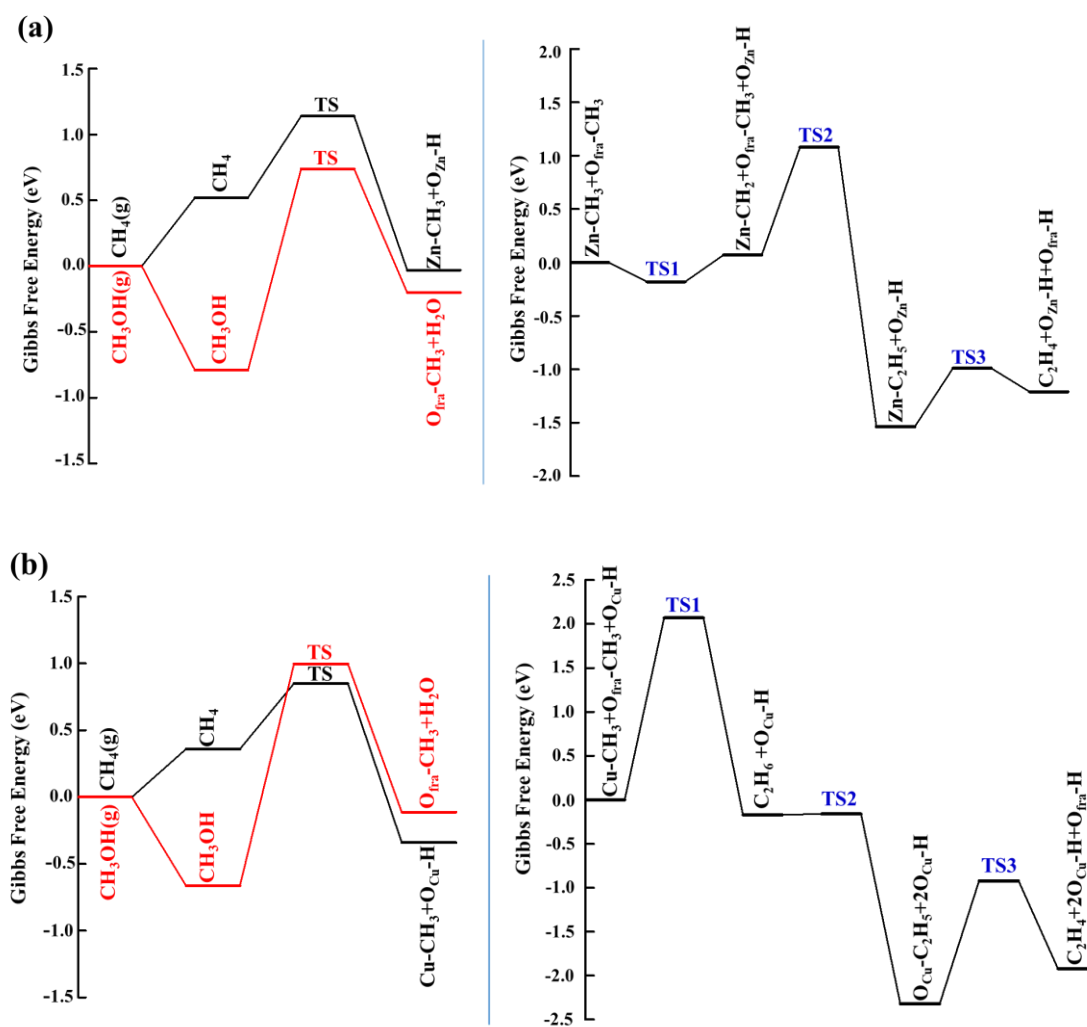



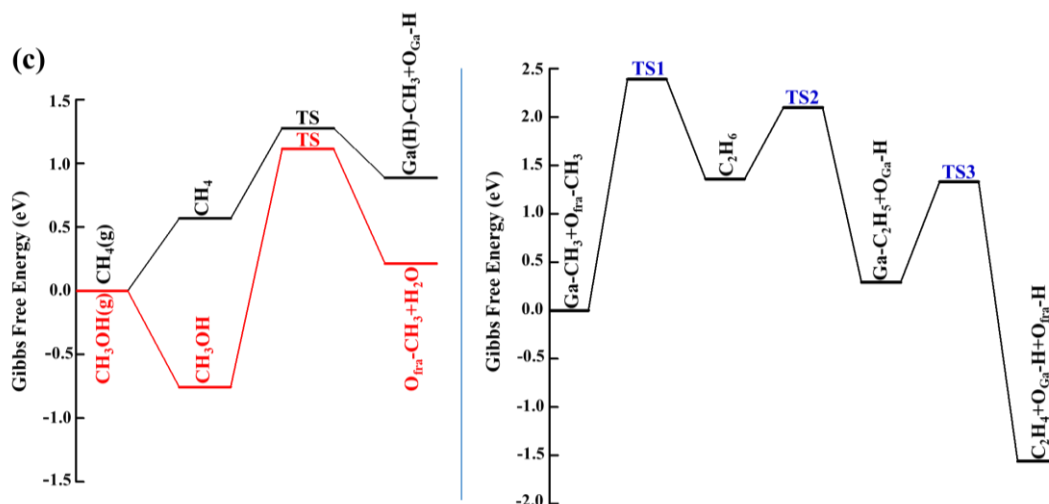

**Figure S14.** Reaction free energy profiles of methane-methanol coupling to ethylene at the reaction temperature of 873 K over (a) Zn/ZSM-5, (b) Cu/ZSM-5, and (c) Ga/ZSM-5.

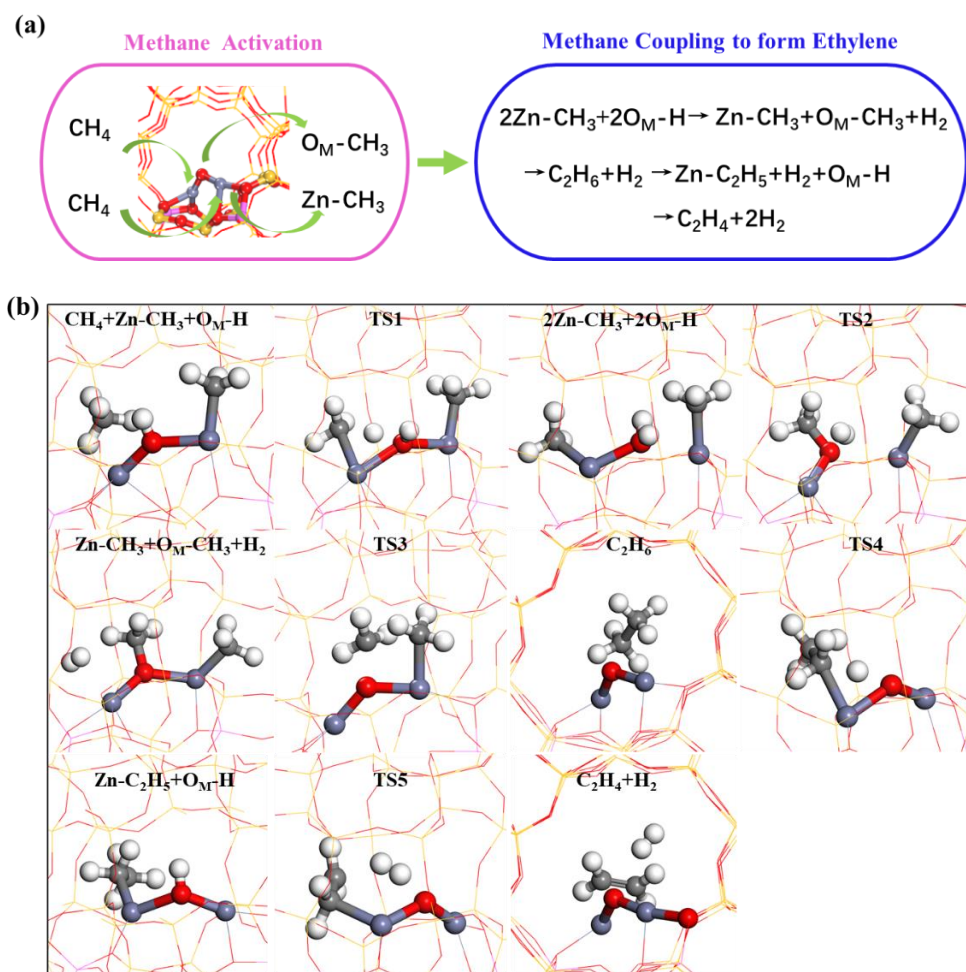

**Figure S15.** (a) Reaction pathways and (b) optimized structures involved in indirect methane coupling in the absence of methanol to ethylene over Zn/ZSM-5.

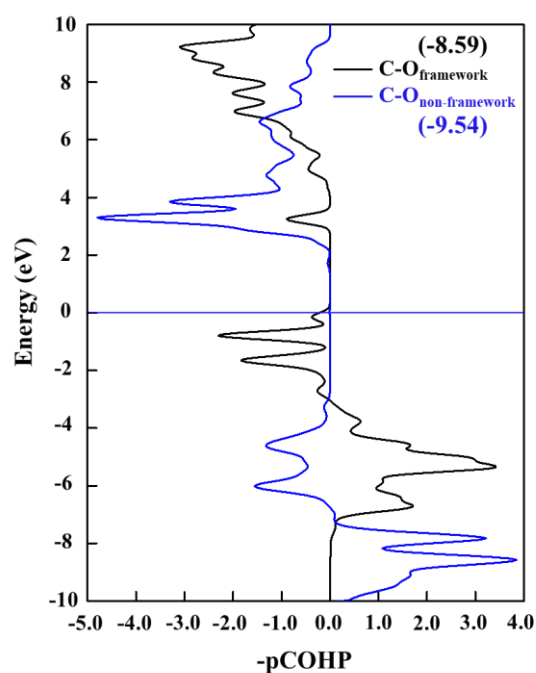

**Figure S16.** The COHP analysis of the C-O bonding interaction of O-CH<sub>3</sub> species (framework oxygen (O<sub>fra</sub>) in methane-methanol coupling and non-framework oxygen (O<sub>M</sub>) in methane coupling) in the adsorption state for the rate-limiting C-C coupling step over Zn/ZSM-5.

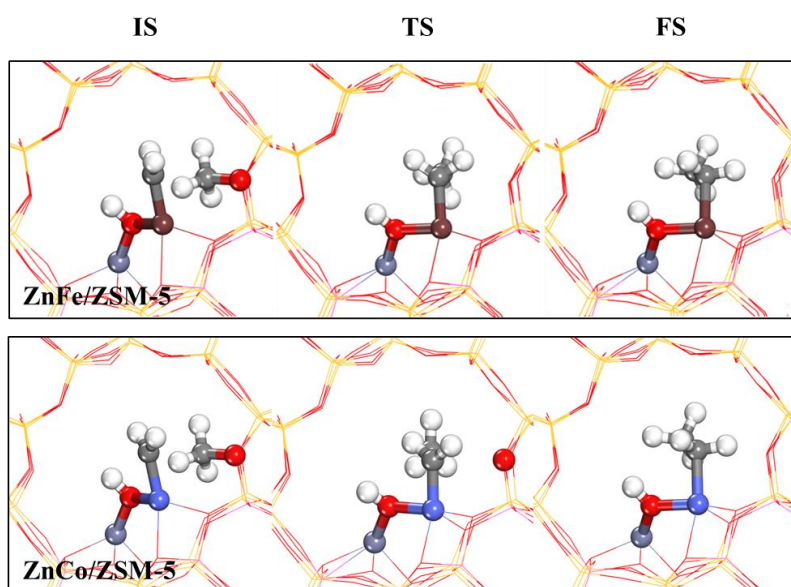

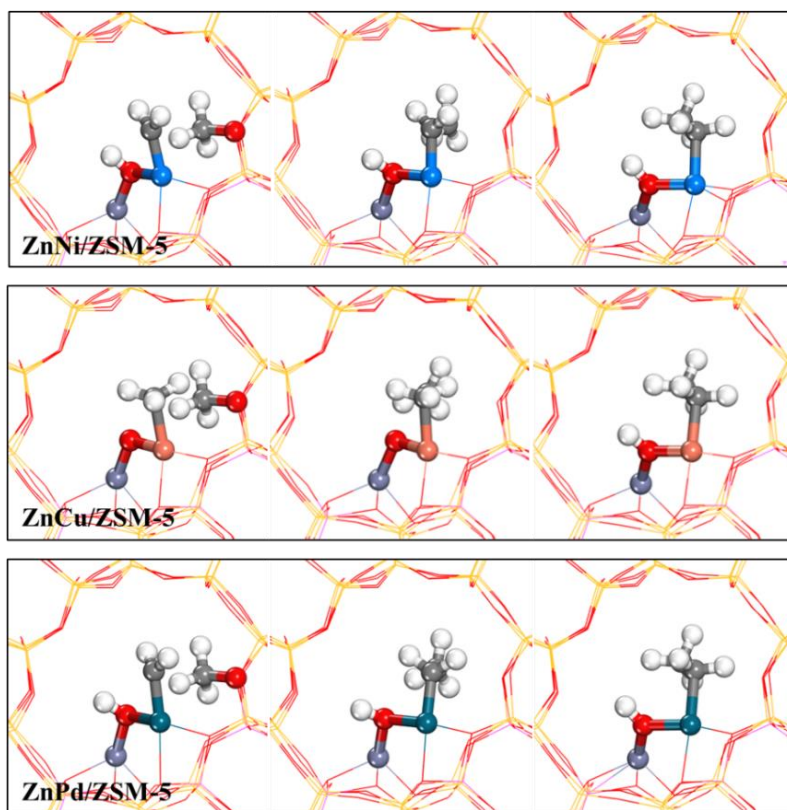

**Figure S17.** Optimized structures of the rate-limiting C-C coupling step for methane-methanol coupling to ethylene over bimetallic Zn-M/ZSM-5 (M=Fe, Co, Ni, Cu, Pd). (*Note:* The M-CH<sub>2</sub>\* intermediate is unstable in the Zn-O-Cu/ZSM-5 system, thus the M-CH<sub>3</sub>\* and O<sub>fra</sub>-CH<sub>3</sub>\* intermediates directly go through C-C coupling concerted with dehydrogenation to form the Cu-C<sub>2</sub>H<sub>5</sub>\* species over Zn-Cu/ZSM-5. Therefore, the examined step is Cu-CH<sub>3</sub>\*+O<sub>fra</sub>-CH<sub>3</sub>\*→Cu-C<sub>2</sub>H<sub>5</sub>\*+H\* for Zn-Cu/ZSM-5, which is different from other bimetallic Zn-M/ZSM-5 candidates.)

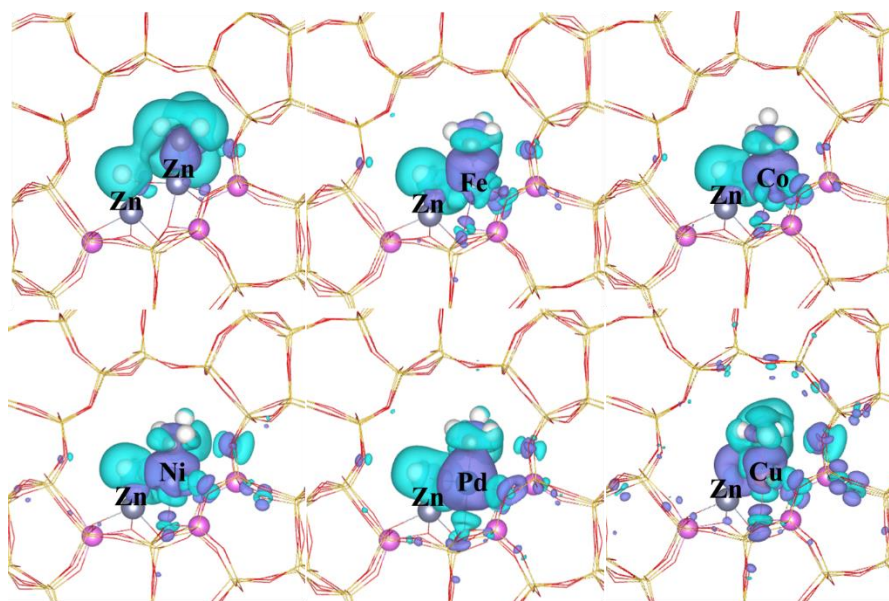

**Figure S18.** The charge density difference maps of transition state of the rate-limiting C-C coupling step for methane-methanol coupling to ethylene over Zn/ZSM-5 and Zn-M/ZSM-5 (M=Fe, Co, Ni, Cu, Pd).

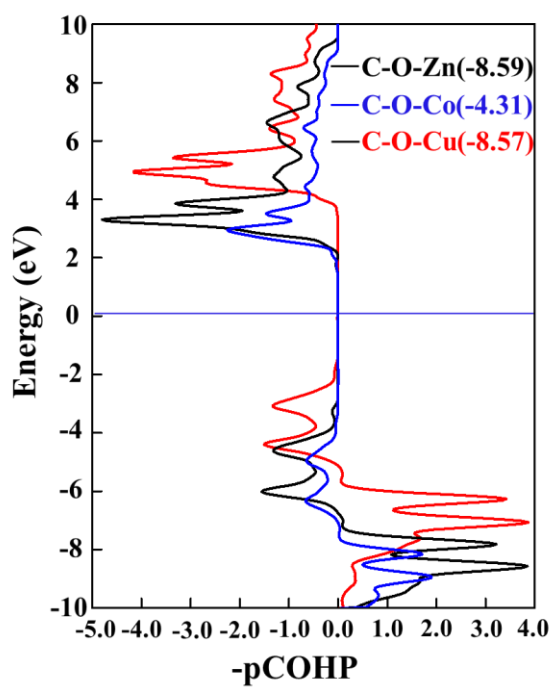

**Figure S19.** COHP analysis for the interaction between C-O bond of  $O_{\text{fra}}\text{-CH}_3$  species in the adsorption state structure for the rate-limiting C-C coupling step over Zn/ZSM-5, Zn-Co/ZSM-5, and Zn-Cu/ZSM-5.

**Table S1.** Key structural parameters (bond distance (Å)) of the adsorption state, transition state and final state structures involved in methane activation via C-H bond dissociation over M/ZSM-5 (M=Zn, Fe, Ga, Mo, La, Cu).

|           | $d_{(\text{H-C})\text{TS}}$ | $d_{(\text{H-O}/\text{CMo})\text{TS}}$ | $d_{(\text{M-C})\text{IS}}$ | $d_{(\text{M-C})\text{FS}}$ | $d_{(\text{H-O}/\text{CMo})\text{FS}}$ |
|-----------|-----------------------------|----------------------------------------|-----------------------------|-----------------------------|----------------------------------------|
| <b>Zn</b> | 1.39                        | 1.28                                   | 2.77                        | 1.95                        | 0.97                                   |
| <b>Fe</b> | 1.47                        | 1.20                                   | 3.52                        | 1.97                        | 0.98                                   |
| <b>Ga</b> | 1.36                        | 1.33                                   | 2.59                        | 1.98                        | 0.99                                   |
| <b>Mo</b> | 1.59                        | 1.39                                   | 3.83                        | 2.16                        | 1.10                                   |
| <b>La</b> | 1.65                        | 1.11                                   | 3.12                        | 2.50                        | 0.97                                   |
| <b>Cu</b> | 1.35                        | 1.22                                   | 3.47                        | 1.99                        | 0.98                                   |

**Table S2.** Activation barrier ( $E_a/\text{eV}$ ) of C-C coupling to form ethylene in the presence and absence of  $\text{H}_2\text{O}$  over Zn/ZSM-5.

|                                                           | $E_a\text{-TS1}$ | $E_a\text{-TS2}$ | $E_a\text{-TS3}$ |
|-----------------------------------------------------------|------------------|------------------|------------------|
| <b>With <math>\text{H}_2\text{O}</math> adsorption</b>    | 0.87             | 1.40             | 1.38             |
| <b>Without <math>\text{H}_2\text{O}</math> adsorption</b> | 0.79             | 1.36             | 1.30             |

**Structure files (CONTCAR) involved in this work:****Figure S1 Zn/ZSM-5**

Si O Al Zn

1.0000000000000000

20.0219999999999985 0.0000000000000000 0.0000000000000000

0.0000000000000000 19.8990000000000009 0.0000000000000000

0.0000000000000000 0.0000000000000000 13.3829999999999991

94 193 2 2

Selective dynamics

Direct

0.4215261869041869 0.0573809269610907 0.6521648512875287 T T T

0.3059561185387311 0.0284653285468148 0.8015745206334209 T T T

0.2806977433112368 0.0582005391029197 0.0214880577591709 T T T

0.1218309185332375 0.0657707676704071 0.0137305823193291 T T T

0.0675986887296990 0.0309484962673762 0.8052720545256835 T T T

0.1830144011764439 0.0606075861359477 0.6711436597398658 T T T

0.4215246775765264 0.8267644553791936 0.6726683838565408 T T T

0.3064555450198920 0.8684111997567738 0.8145352605960360 T T T

0.2678992943236129 0.8301005060930456 0.0324565033508951 T T T

0.1138488959645055 0.8267948451663468 0.0198370356599707 T T T

0.0674012558496413 0.8741690303097880 0.8075963695421488 T T T

0.1840479470821631 0.8277588050950717 0.6771132901541908 T T T

0.0785910110832030 0.9434808732106177 0.1527299585981703 T T T

0.1948005322259151 0.9720409975849772 0.3017044477959481 T T T

0.2194992061489139 0.9407166574191221 0.5211446713953130 T T T

0.3787888736513818 0.9341232625447465 0.5142526855623384 T T T

0.4337059995442638 0.9684203090221891 0.3056735689836264 T T T

0.3181386224457587 0.9391764696908627 0.1719084955247541 T T T

0.0806813821293311 0.1730668020504414 0.1710061601472913 T T T

0.1948168456649264 0.1321648158177333 0.3149177359670783 T T T

0.2327213443302013 0.1707933837720931 0.5321807497514254 T T T

0.3870936809887089 0.1734248782678089 0.5175731628642725 T T T

0.4338280571236106 0.1255319787602245 0.3050618554297836 T T T

0.3159743557771326 0.1718055575423721 0.1767197123535590 T T T

0.5758158603629109 0.5551940512768843 0.3523072546775255 T T T

0.6873147020961976 0.5257500584071989 0.1947312654232188 T T T

0.7131707872681474 0.5640157182701228 0.9837519479814671 T T T

0.8730818301308133 0.5713043449864281 0.9839861863470256 T T T

0.9289192496924814 0.5320687329557646 0.1884423841781670 T T T

0.8092691386730400 0.5553452913597293 0.3256404503532329 T T T

0.5738497984211164 0.3255163442181351 0.3235259358523232 T T T

0.6914232685885339 0.3694175296051087 0.1801839012499925 T T T

0.7301147826191080 0.3279639309602464 0.9671456150066089 T T T

0.8835111779765965 0.3268429428193046 0.9893201741254615 T T T

0.9383121602887857 0.3779064014759335 0.1878042396767310 T T T

0.9185581230203939 0.4439930962805764 0.8539574970678214 T T T

0.8042513712156418 0.4730826252086636 0.7083993853642899 T T T

0.7714209562322781 0.4412186053185980 0.4834728488503069 T T T

0.6117426399771652 0.4292717457188330 0.4859904076684100 T T T

0.5660261734379679 0.4691046471205845 0.6979410266372138 T T T

0.6799888216801407 0.4459542153544067 0.8424019143627890 T T T

0.9211786590224589 0.6771997233882044 0.8270569561154059 T T T

0.7723732510480891 0.6668930932594604 0.4594347539995241 T T T

0.6176065290012113 0.6726789056211836 0.4809641490271064 T T T

**Structure files (CONTCAR) involved in this work:**

|                    |                    |                    |   |   |   |
|--------------------|--------------------|--------------------|---|---|---|
| 0.5643870311451251 | 0.6266247691515102 | 0.6902768152028441 | T | T | T |
| 0.6801832147558571 | 0.6707620033054541 | 0.8160656956716308 | T | T | T |
| 0.5799739545676835 | 0.9442723603988689 | 0.3490156762250063 | T | T | T |
| 0.6955735179669700 | 0.9701116865586107 | 0.1948738247218007 | T | T | T |
| 0.7212605987568698 | 0.9384390414851208 | 0.9785504394680312 | T | T | T |
| 0.8797791236036625 | 0.9347668012703731 | 0.9888055439233168 | T | T | T |
| 0.9343833864112537 | 0.9693329235236733 | 0.1964331757914728 | T | T | T |
| 0.8172042709085339 | 0.9385162049043518 | 0.3289637863454439 | T | T | T |
| 0.5785193120209656 | 0.1706185694820246 | 0.3240742633371811 | T | T | T |
| 0.6973529717045180 | 0.1313822251110842 | 0.1828587498360124 | T | T | T |
| 0.7327039166602324 | 0.1708007580659634 | 0.9638424645407296 | T | T | T |
| 0.8867972549970956 | 0.1735381265352511 | 0.9800083359897097 | T | T | T |
| 0.9350419052870060 | 0.1262455354674155 | 0.1918870260642131 | T | T | T |
| 0.8187533699037771 | 0.1717878261124387 | 0.3227954798333357 | T | T | T |
| 0.9223762213527024 | 0.0569924083749211 | 0.8486378542687799 | T | T | T |
| 0.8069932090037081 | 0.0275612055450458 | 0.6983457717174028 | T | T | T |
| 0.7803043276494294 | 0.0588857311750778 | 0.4789013238703349 | T | T | T |
| 0.6209118137501254 | 0.0683168808533530 | 0.4874881913160254 | T | T | T |
| 0.5659928838965861 | 0.0303462580138342 | 0.6938232535692832 | T | T | T |
| 0.6829690560294509 | 0.0575359279351737 | 0.8286454828908495 | T | T | T |
| 0.9229306765157871 | 0.8285539439023478 | 0.8296738429513044 | T | T | T |
| 0.8084566758101984 | 0.8677561782590317 | 0.6852953657063349 | T | T | T |
| 0.7729087444507471 | 0.8279264286133969 | 0.4681681656468004 | T | T | T |
| 0.6180445490079415 | 0.8263790179445797 | 0.4808567181524907 | T | T | T |
| 0.5680290634264695 | 0.8731143408830512 | 0.6911842254090987 | T | T | T |
| 0.6860468278311787 | 0.8279314897093325 | 0.8196278118296761 | T | T | T |
| 0.4209179577193841 | 0.4432579775421475 | 0.6523555919537897 | T | T | T |
| 0.3053640610377212 | 0.4710917692936915 | 0.8013009390962224 | T | T | T |
| 0.2777367999251289 | 0.4424931846869421 | 0.0203479056300557 | T | T | T |
| 0.1208501310780221 | 0.4346604721998679 | 0.0158911182196200 | T | T | T |
| 0.0640864753622936 | 0.4680953656729654 | 0.8080053995314543 | T | T | T |
| 0.1804643263152607 | 0.4397387294616527 | 0.6730155723589548 | T | T | T |
| 0.4178718598700339 | 0.6730385751092784 | 0.6693870368063467 | T | T | T |
| 0.3055885947690762 | 0.6307046729810709 | 0.8143138786747152 | T | T | T |
| 0.2682368562899677 | 0.6700593817770201 | 0.0325559639542027 | T | T | T |
| 0.1145811418632800 | 0.6726112493386572 | 0.0176926076071254 | T | T | T |
| 0.0663791157430679 | 0.6261687293421020 | 0.8065411355702343 | T | T | T |
| 0.1836370752722059 | 0.6702716382843876 | 0.6762123064566634 | T | T | T |
| 0.0745324133030900 | 0.5570902648596061 | 0.1527421855174031 | T | T | T |
| 0.1911399888442382 | 0.5281598317014755 | 0.3010559537554529 | T | T | T |
| 0.2175796443364623 | 0.5575854197315622 | 0.5212172346192021 | T | T | T |
| 0.3756757899282825 | 0.5658248632921958 | 0.5151982597014177 | T | T | T |
| 0.4319628882988962 | 0.5306471775146288 | 0.3069994662802287 | T | T | T |
| 0.3162208364179956 | 0.5603898779157404 | 0.1711396846369715 | T | T | T |
| 0.0830417365804484 | 0.3264293876407636 | 0.1694335847096314 | T | T | T |
| 0.1928882485207066 | 0.3682614770691120 | 0.3163602084072310 | T | T | T |
| 0.2320074995482957 | 0.3306994472719804 | 0.5330389564017854 | T | T | T |
| 0.3861035631927369 | 0.3276403996424783 | 0.5148518813799126 | T | T | T |
| 0.4317306377603043 | 0.3730096224466599 | 0.3016350648368943 | T | T | T |
| 0.3121440469696101 | 0.3289328121754290 | 0.1755063950534962 | T | T | T |
| 0.3574596715573891 | 0.0646316209874281 | 0.7253918166025982 | T | T | T |
| 0.3175991951981899 | 0.0577587820690600 | 0.9133513326013482 | T | T | T |
| 0.2009250082752224 | 0.0502539827240715 | 0.0057802487173628 | T | T | T |

**Structure files (CONTCAR) involved in this work:**

|                    |                    |                    |   |   |   |
|--------------------|--------------------|--------------------|---|---|---|
| 0.0893724556881354 | 0.0737833012398518 | 0.9034800706299079 | T | T | T |
| 0.1057256950492794 | 0.0589515008567603 | 0.7068199086489324 | T | T | T |
| 0.2296750216344028 | 0.0445997968012827 | 0.7677700246679415 | T | T | T |
| 0.3664520197184537 | 0.8273911704408348 | 0.7614436805211821 | T | T | T |
| 0.3084747066949369 | 0.8519986708813649 | 0.9328357475074144 | T | T | T |
| 0.1905089043358320 | 0.8541087889758286 | 0.0224322334534721 | T | T | T |
| 0.0863059216627954 | 0.8310160548772074 | 0.9063636175683093 | T | T | T |
| 0.1079629949257538 | 0.8439611922513576 | 0.7123256626934813 | T | T | T |
| 0.2345011149524188 | 0.8457319735289152 | 0.7689645284215362 | T | T | T |
| 0.3184959474532653 | 0.9479944024625403 | 0.7962450141389463 | T | T | T |
| 0.0871914981070046 | 0.9525488393356449 | 0.8248851442723956 | T | T | T |
| 0.4316503598117436 | 0.1279895212173104 | 0.5929898560414101 | T | T | T |
| 0.4126796671004471 | 0.9975452983688052 | 0.5708020717302756 | T | T | T |
| 0.3926472247956235 | 0.8650983789968888 | 0.5748601272896654 | T | T | T |
| 0.1994360201305077 | 0.1350150150835915 | 0.6286320009884486 | T | T | T |
| 0.1941901234398236 | 0.0051161117797975 | 0.5843485998398198 | T | T | T |
| 0.2017542929605265 | 0.8710971989815218 | 0.5780002861673768 | T | T | T |
| 0.9884732156891821 | 0.0402362450520907 | 0.7831256752726236 | T | T | T |
| 0.9878747480802913 | 0.8683341736028041 | 0.7861784784876658 | T | T | T |
| 0.1434794353979102 | 0.9367121649547625 | 0.2244149938441378 | T | T | T |
| 0.1825939083202876 | 0.9419166752342607 | 0.4129332947343211 | T | T | T |
| 0.2993175567932320 | 0.9469347628652898 | 0.5050943721325243 | T | T | T |
| 0.4116477774986276 | 0.9261948789677195 | 0.4042848799407814 | T | T | T |
| 0.3953877857450009 | 0.9399850935795923 | 0.2076965096613006 | T | T | T |
| 0.2711438603710817 | 0.9559502170084549 | 0.2680334287875419 | T | T | T |
| 0.1363698910153314 | 0.1737067946204461 | 0.2588538115345416 | T | T | T |
| 0.1913885845709326 | 0.1499072253950501 | 0.4326764081839868 | T | T | T |
| 0.3100499900802210 | 0.1468601946907603 | 0.5197692430581806 | T | T | T |
| 0.4156761142098558 | 0.1684104945180336 | 0.4045803106329254 | T | T | T |
| 0.3925984012783042 | 0.1563580781588216 | 0.2105824693248635 | T | T | T |
| 0.2674986455738371 | 0.1537119103814805 | 0.2708975154924351 | T | T | T |
| 0.1821476534276174 | 0.0525519367072531 | 0.2980615597615645 | T | T | T |
| 0.4142623348029868 | 0.0471402421125755 | 0.3229306303932037 | T | T | T |
| 0.0686979264232360 | 0.8728060517394006 | 0.0935926922777184 | T | T | T |
| 0.0858870373849192 | 0.0041325306454095 | 0.0721554721499808 | T | T | T |
| 0.1101290593748059 | 0.1361567326252945 | 0.0723173081307269 | T | T | T |
| 0.3015185120433077 | 0.8648264370976583 | 0.1294583101789361 | T | T | T |
| 0.3076509341407145 | 0.9945885284741686 | 0.0848657071503215 | T | T | T |
| 0.2969646435225010 | 0.1281080554412405 | 0.0785660800810342 | T | T | T |
| 0.5128163421312910 | 0.9582052858529457 | 0.2845736411158020 | T | T | T |
| 0.5133181960714565 | 0.1307448557799264 | 0.2816825261910115 | T | T | T |
| 0.6413114458915591 | 0.5569419638656055 | 0.2820994343054212 | T | T | T |
| 0.6813504291859795 | 0.5719099147978239 | 0.0952504233572477 | T | T | T |
| 0.7937528609738422 | 0.5567521352837388 | 0.9901437773339903 | T | T | T |
| 0.9020452652979554 | 0.5785418717760628 | 0.0977245136920380 | T | T | T |
| 0.8865726549067349 | 0.5424875062719827 | 0.2922864475564467 | T | T | T |
| 0.7644597963902100 | 0.5291851789597449 | 0.2341727166808658 | T | T | T |
| 0.6372491397429340 | 0.3303113652703612 | 0.2495467117036312 | T | T | T |
| 0.6859168752460546 | 0.3394781917858505 | 0.0671117136035383 | T | T | T |
| 0.8066703827421028 | 0.3528088678482570 | 0.9868950971455934 | T | T | T |
| 0.9090660286114010 | 0.3260928781675121 | 0.1056255049928297 | T | T | T |
| 0.9025395166993566 | 0.3645214747704854 | 0.2974481301305283 | T | T | T |
| 0.7652643253875107 | 0.3608502500084642 | 0.2252603827058874 | T | T | T |



**Structure files (CONTCAR) involved in this work:**

|                    |                    |                    |   |   |   |
|--------------------|--------------------|--------------------|---|---|---|
| 0.6683710536173817 | 0.4482067088559434 | 0.1745503850535602 | T | T | T |
| 0.9217331888513819 | 0.4541332783638423 | 0.1528991112606786 | T | T | T |
| 0.5712504985379528 | 0.6271472260338311 | 0.4082975965894231 | T | T | T |
| 0.5789340936452924 | 0.4955816766164514 | 0.4354234055153125 | T | T | T |
| 0.5880809767344468 | 0.3611665131442766 | 0.4309919788065735 | T | T | T |
| 0.7981994753315504 | 0.6340270422457965 | 0.3540095332459303 | T | T | T |
| 0.7940644379109512 | 0.5137404401889173 | 0.4308136484713007 | T | T | T |
| 0.8128945559946273 | 0.3830200193186009 | 0.4277718572473150 | T | T | T |
| 0.0058952302895863 | 0.5486666911728688 | 0.2170339140995683 | T | T | T |
| 0.0175711051979979 | 0.3686895163456747 | 0.2046748831175172 | T | T | T |
| 0.8553811990033983 | 0.4311234679282471 | 0.7788784969769389 | T | T | T |
| 0.7966573724160037 | 0.4392283214677962 | 0.5983167211576558 | T | T | T |
| 0.6922490761256472 | 0.4344741086545156 | 0.4740885936891736 | T | T | T |
| 0.5908841082568991 | 0.4248601602134111 | 0.6024148158483996 | T | T | T |
| 0.6051252044707924 | 0.4443442710259535 | 0.7971926801808562 | T | T | T |
| 0.7307036288467795 | 0.4762444815558993 | 0.7580432410071015 | T | T | T |
| 0.8681251690001071 | 0.6808552297015843 | 0.7382836592708164 | T | T | T |
| 0.8202663154565252 | 0.6363542738371758 | 0.5490548982534126 | T | T | T |
| 0.6948862959416947 | 0.6453881825379316 | 0.4794520072609829 | T | T | T |
| 0.5881570906395073 | 0.6688966449708860 | 0.5930160838899698 | T | T | T |
| 0.6017611675554571 | 0.6576761111725657 | 0.7872824698826854 | T | T | T |
| 0.7275501714235723 | 0.6483551308166073 | 0.7244311551865434 | T | T | T |
| 0.8348382376627389 | 0.5480765963814992 | 0.6884631929421484 | T | T | T |
| 0.5825685524041589 | 0.5475753064569722 | 0.6748249604358898 | T | T | T |
| 0.9291068215974662 | 0.3773522386868105 | 0.9227774236634837 | T | T | T |
| 0.9075195202641091 | 0.5083030974148368 | 0.9265824307633466 | T | T | T |
| 0.8898360464598577 | 0.6403504535100634 | 0.9259358450227528 | T | T | T |
| 0.7003727380471400 | 0.3700080010947039 | 0.8731507525043881 | T | T | T |
| 0.6823512195690173 | 0.4946506111078326 | 0.9391321009707351 | T | T | T |
| 0.6947873331539142 | 0.6287532670542031 | 0.9178877131503363 | T | T | T |
| 0.4872524377645499 | 0.4562203661495922 | 0.7193437495609434 | T | T | T |
| 0.4842354130343130 | 0.6330527673551397 | 0.7055055533797306 | T | T | T |
| 0.6428830862314433 | 0.9387545674320212 | 0.2737006078216667 | T | T | T |
| 0.6828421866326818 | 0.9367492141628742 | 0.0856570768492251 | T | T | T |
| 0.8004245660111752 | 0.9481377349681106 | 0.9981135379758336 | T | T | T |
| 0.9124228305993738 | 0.9257780514825318 | 0.0989851246251278 | T | T | T |
| 0.8947164720780991 | 0.9451889088475072 | 0.2956747446205581 | T | T | T |
| 0.7709287279967443 | 0.9518938457020993 | 0.2311406694031641 | T | T | T |
| 0.6369898049620022 | 0.1689624817221136 | 0.2407890878052983 | T | T | T |
| 0.6936167253075178 | 0.1551397031681865 | 0.0672308419080794 | T | T | T |
| 0.8100995681735240 | 0.1465549668482972 | 0.9751325636420466 | T | T | T |
| 0.9142333600986795 | 0.1689835757717257 | 0.0934926444547126 | T | T | T |
| 0.8950853796755222 | 0.1536203734811258 | 0.2887105523137655 | T | T | T |
| 0.7692711937466965 | 0.1513728823722160 | 0.2300271075333580 | T | T | T |
| 0.6862035814455523 | 0.0508799121312066 | 0.1909328683217303 | T | T | T |
| 0.9180331442023173 | 0.0476462230714321 | 0.1722354675076707 | T | T | T |
| 0.5729722024011223 | 0.8732765427316317 | 0.4083271963764053 | T | T | T |
| 0.5886475065673287 | 0.0044797547112339 | 0.4295790072157705 | T | T | T |
| 0.6050133627445691 | 0.1372501222963465 | 0.4274557798051774 | T | T | T |
| 0.8058065018445290 | 0.8626132759347340 | 0.3704570393284846 | T | T | T |
| 0.8003553193779270 | 0.9921279109866447 | 0.4162613075084263 | T | T | T |
| 0.8010098539468993 | 0.1269018074507572 | 0.4209708936422452 | T | T | T |
| 0.0130823650824854 | 0.9578561866197383 | 0.2206629522039389 | T | T | T |

**Structure files (CONTCAR) involved in this work:**

|                    |                    |                    |   |   |   |
|--------------------|--------------------|--------------------|---|---|---|
| 0.0145699942199683 | 0.1351176766085593 | 0.2124787482429921 | T | T | T |
| 0.8586607360177647 | 0.0636719583396301 | 0.7745504161017170 | T | T | T |
| 0.8184449119842734 | 0.0563279337258658 | 0.5862481936538373 | T | T | T |
| 0.7004693527028613 | 0.0573334213404897 | 0.4977185355586959 | T | T | T |
| 0.5875225399878641 | 0.0750093984036990 | 0.5973807209023404 | T | T | T |
| 0.6058326290577936 | 0.0544879931884592 | 0.7927385673840022 | T | T | T |
| 0.7306159398747779 | 0.0430533813439655 | 0.7325070260774331 | T | T | T |
| 0.8667033804692272 | 0.8271843860603573 | 0.7427306843971575 | T | T | T |
| 0.8136535735184486 | 0.8506528505519210 | 0.5671568410948039 | T | T | T |
| 0.6954259185383714 | 0.8516614197780612 | 0.4787042304401805 | T | T | T |
| 0.5897886118361291 | 0.8292018555686729 | 0.5942374307529367 | T | T | T |
| 0.6101029353135785 | 0.8484477641064213 | 0.7882858057991918 | T | T | T |
| 0.7350749723586409 | 0.8454814650464445 | 0.7256993603184207 | T | T | T |
| 0.8201386229719566 | 0.9473014693930454 | 0.7037212850137265 | T | T | T |
| 0.5825974718256959 | 0.9520016937415903 | 0.6687745891970130 | T | T | T |
| 0.9325518473258319 | 0.1286852361745302 | 0.9053440874647360 | T | T | T |
| 0.9134705716241321 | 0.9984534265832795 | 0.9321492170391913 | T | T | T |
| 0.8934937412766273 | 0.8658727857093382 | 0.9280361991394932 | T | T | T |
| 0.6974835854304720 | 0.1319423489797643 | 0.8719472134949465 | T | T | T |
| 0.6944122313722474 | 0.0022960357622286 | 0.9155781061972835 | T | T | T |
| 0.7077689057663047 | 0.8690113188441075 | 0.9190767243737563 | T | T | T |
| 0.4873301254611670 | 0.0414006264368942 | 0.7186028223540444 | T | T | T |
| 0.4890874526717572 | 0.8624252750657936 | 0.7138318565524908 | T | T | T |
| 0.3567611224005218 | 0.4340894586867579 | 0.7253594557877304 | T | T | T |
| 0.3155018993737284 | 0.4406421261323660 | 0.9128635901836152 | T | T | T |
| 0.1985324569742778 | 0.4554407249865060 | 0.0033554275558135 | T | T | T |
| 0.0858079448233338 | 0.4265702587883287 | 0.9076083584897123 | T | T | T |
| 0.1036870588309213 | 0.4392332137964438 | 0.7114024969767275 | T | T | T |
| 0.2286685229435697 | 0.4573892904254100 | 0.7672727702754110 | T | T | T |
| 0.3640274906662555 | 0.6733132694307992 | 0.7599747402143365 | T | T | T |
| 0.3079623525616924 | 0.6481599537208143 | 0.9322151067751582 | T | T | T |
| 0.1909874496179602 | 0.6449773350542317 | 0.0248956585246030 | T | T | T |
| 0.0901301845642471 | 0.6697991135172014 | 0.9026112580231178 | T | T | T |
| 0.1072566201583644 | 0.6525391160137316 | 0.7087584622480819 | T | T | T |
| 0.2327557938433391 | 0.6509524694901816 | 0.7692070761304780 | T | T | T |
| 0.3200505246281402 | 0.5512947462598505 | 0.7974393379173875 | T | T | T |
| 0.0820655996387432 | 0.5469819478698045 | 0.8259152347391161 | T | T | T |
| 0.4311092692713704 | 0.3750574905424534 | 0.5870558856692759 | T | T | T |
| 0.4126303893770436 | 0.5064190624331129 | 0.5767465533469867 | T | T | T |
| 0.3849849723625940 | 0.6373433298188476 | 0.5716788480139579 | T | T | T |
| 0.1990398144159684 | 0.3658755499145032 | 0.6302543582194244 | T | T | T |
| 0.1885346128317010 | 0.4954953950161103 | 0.5858158712444527 | T | T | T |
| 0.2032967108339312 | 0.6285312529531342 | 0.5763757925346926 | T | T | T |
| 0.9849217701919347 | 0.4568190361937763 | 0.7870579294125504 | T | T | T |
| 0.9870851942336856 | 0.6359263354001671 | 0.7885249313811455 | T | T | T |
| 0.1372886349847358 | 0.5642543322095395 | 0.2282893579739209 | T | T | T |
| 0.1807028646676117 | 0.5570383195558387 | 0.4131284396866799 | T | T | T |
| 0.2971969259600059 | 0.5472780085894720 | 0.5054137927809035 | T | T | T |
| 0.4092431839003950 | 0.5725511047488582 | 0.4054819654738199 | T | T | T |
| 0.3926870458513123 | 0.5572477722107048 | 0.2093281358801510 | T | T | T |
| 0.2666863819155393 | 0.5449041713813286 | 0.2646682672552083 | T | T | T |
| 0.1343460470386988 | 0.3252867453919593 | 0.2628124716319471 | T | T | T |
| 0.1897418071750559 | 0.3528568736184311 | 0.4348134330944912 | T | T | T |

**Structure files (CONTCAR) involved in this work:**

|                    |                    |                    |   |   |   |
|--------------------|--------------------|--------------------|---|---|---|
| 0.3092002643096950 | 0.3546061031572362 | 0.5186793456692841 | T | T | T |
| 0.4131182006932093 | 0.3295228192764323 | 0.4005413576660261 | T | T | T |
| 0.3882059369777557 | 0.3481958861323934 | 0.2061925329830991 | T | T | T |
| 0.2649973467608135 | 0.3454965039348296 | 0.2719188775971027 | T | T | T |
| 0.1794037028712284 | 0.4474478932590262 | 0.2954732144982645 | T | T | T |
| 0.4165797829138767 | 0.4514772844732953 | 0.3263456321277315 | T | T | T |
| 0.0675193221282731 | 0.6252366115643960 | 0.0868653535533474 | T | T | T |
| 0.0822084112082420 | 0.4923847483252822 | 0.0795492368306308 | T | T | T |
| 0.1162026190760665 | 0.3625708862015030 | 0.0727034076351671 | T | T | T |
| 0.3029149337318588 | 0.6353731710234513 | 0.1287825288984508 | T | T | T |
| 0.3070060414010299 | 0.5051122233774631 | 0.0836136445054980 | T | T | T |
| 0.2895367822495292 | 0.3719443011121197 | 0.0782815049102876 | T | T | T |
| 0.5104482162934266 | 0.5434095085768302 | 0.2834985893856605 | T | T | T |
| 0.5096695157566522 | 0.3620615087615152 | 0.2720178002030523 | T | T | T |
| 0.4369986860767407 | 0.7497320636392316 | 0.6407139596143642 | T | T | T |
| 0.1910423732759366 | 0.7490704437254967 | 0.6480934378393918 | T | T | T |
| 0.2719930396722025 | 0.7500355737688097 | 0.0483882861831553 | T | T | T |
| 0.1099112840644347 | 0.7493992519865545 | 0.0577587655400228 | T | T | T |
| 0.0626202578424397 | 0.2501476469229899 | 0.1407786062069513 | T | T | T |
| 0.3070042932883686 | 0.2501652342900733 | 0.1461467238723706 | T | T | T |
| 0.2282995629262985 | 0.2507241765935677 | 0.5500529819912501 | T | T | T |
| 0.3908151968231526 | 0.2509061589210573 | 0.5549908623209839 | T | T | T |
| 0.5574708135191572 | 0.2475817259601466 | 0.3470767317634481 | T | T | T |
| 0.8131120070724552 | 0.2498573755550618 | 0.3487646592644065 | T | T | T |
| 0.7290128412991445 | 0.2496978823269113 | 0.9359904941696969 | T | T | T |
| 0.8906703346316828 | 0.2515952155449943 | 0.9445127965050099 | T | T | T |
| 0.9434482188832538 | 0.7526380602836824 | 0.8611415350335611 | T | T | T |
| 0.6906796081451798 | 0.7490915804992906 | 0.8461398578065649 | T | T | T |
| 0.7787553103426739 | 0.7472941323114278 | 0.4539814036870960 | T | T | T |
| 0.6142795954884736 | 0.7494417463270391 | 0.4408892816722933 | T | T | T |
| 0.9417575930155437 | 0.4899457819661792 | 0.4990451548495333 | T | T | T |
| 0.8171260194373967 | 0.3329150093540418 | 0.3189451464675356 | T | T | T |
| 0.8072977946478551 | 0.6338209065656726 | 0.6830253666437422 | T | T | T |
| 0.9137205811912018 | 0.4267750905195370 | 0.4118535386903046 | T | T | T |
| 0.8813957902597264 | 0.5510515141027812 | 0.5463799577271241 | T | T | T |

**Figure S1 Fe/ZSM-5**

1.0000000000000000

20.0219993591000005 0.0000000000000000 0.0000000000000000

0.0000000000000000 19.8990001678000006 0.0000000000000000

0.0000000000000000 0.0000000000000000 13.3830003737999998

Si O Al Fe

94 193 2 2

## Direct

0.4215551130546175 0.0565724124945917 0.6505401436922217

0.3061892262011225 0.0287373189438237 0.7993281579746476

0.2795477902722761 0.0593903253732192 0.0195652636240726

0.1199860785678873 0.0658819544934472 0.0130252962306855

0.0657578419822455 0.0303535244874677 0.8027006590069299

0.1825049856946031 0.0608663015889563 0.6693333769056565

0.4176295814418585 0.8267943580420495 0.6688565653553491

0.3043820695883894 0.8694112115176613 0.8120515467972548

0.2686057001586401 0.8298402711671032 0.0307615351544156

0.1144663103484649 0.8263396287144261 0.0178365889200574

**Structure files (CONTCAR) involved in this work:**

|                    |                    |                    |
|--------------------|--------------------|--------------------|
| 0.0663715408506379 | 0.8717910390235414 | 0.8050379629294827 |
| 0.1832213312665389 | 0.8290007110232196 | 0.6758153895386141 |
| 0.0778770020633109 | 0.9420373555854273 | 0.1512717899038710 |
| 0.1936034841253187 | 0.9699391213134732 | 0.2995868366818405 |
| 0.2186763022432283 | 0.9414768068385763 | 0.5194288503430923 |
| 0.3773624654897580 | 0.9333606794712112 | 0.5126554284178935 |
| 0.4337082397531202 | 0.9695074580268164 | 0.3043347085280289 |
| 0.3174923183554744 | 0.9396921835056247 | 0.1697449442698580 |
| 0.0802429113461935 | 0.1725054742819695 | 0.1725209222041126 |
| 0.1956725118316965 | 0.1294079431520861 | 0.3126443009441752 |
| 0.2322207187102655 | 0.1703225680204329 | 0.5294177768686863 |
| 0.3867508063269169 | 0.1729951807369620 | 0.5148899317479456 |
| 0.4348421980115056 | 0.1272309509827625 | 0.3034141626373058 |
| 0.3166758174675355 | 0.1705991467541621 | 0.1761384657468291 |
| 0.5778534702938034 | 0.5564680633402153 | 0.3488332067294048 |
| 0.6925738494626390 | 0.5281574473397882 | 0.1978747692232275 |
| 0.7183788434207227 | 0.5548295121146753 | 0.9796061835518772 |
| 0.8763242385319242 | 0.5662312926362879 | 0.9904188825581303 |
| 0.9329473764115813 | 0.5302652013909206 | 0.1979945895605203 |
| 0.8151969987851109 | 0.5588321561559170 | 0.3293222975020142 |
| 0.5788055668444689 | 0.3274959362444363 | 0.3286407074538952 |
| 0.6947771346193613 | 0.3685538498138898 | 0.1867751524187270 |
| 0.7316587737039810 | 0.3247958971068032 | 0.9699530706988209 |
| 0.8861575276342767 | 0.3278021221999573 | 0.9852552024418197 |
| 0.9348911352654827 | 0.3727884299115723 | 0.1963876013595895 |
| 0.8168615209442314 | 0.3305987061430741 | 0.3254043024289061 |
| 0.9224419799020731 | 0.4458093769289891 | 0.8506316537381416 |
| 0.8050686184448880 | 0.4716312808934129 | 0.7028133510381690 |
| 0.7794359667695031 | 0.4407205899828011 | 0.4831853342039023 |
| 0.6199272170154431 | 0.4331677658392556 | 0.4892366563830453 |
| 0.5655040942507176 | 0.4680596148858781 | 0.6993310997786599 |
| 0.6815579395895709 | 0.4349997516275588 | 0.8321650954362108 |
| 0.8012202114209208 | 0.6311119566575765 | 0.6824742158272481 |
| 0.7656496067803866 | 0.6686253595597887 | 0.4640104623148549 |
| 0.6115105451778154 | 0.6728350891559038 | 0.4805328142099460 |
| 0.5652913207169610 | 0.6262150871314173 | 0.6951960532596232 |
| 0.6823160763575843 | 0.6684556394001119 | 0.8212127402174060 |
| 0.5783072682592252 | 0.9430038243646458 | 0.3502159786192399 |
| 0.6927980537241497 | 0.9718560632694407 | 0.2017500882984123 |
| 0.7204174947172718 | 0.9387890329792589 | 0.9834029531701003 |
| 0.8776440832997982 | 0.9409953945711386 | 0.9881241698312883 |
| 0.9337025493332189 | 0.9690799077573115 | 0.1977750837174572 |
| 0.8159155283744728 | 0.9387177641515718 | 0.3283997848213736 |
| 0.5794520142067939 | 0.1740715128505975 | 0.3258943277852926 |
| 0.6947974341891630 | 0.1305729744953572 | 0.1883105353884920 |
| 0.7352560571540034 | 0.1650390165920464 | 0.9702776121412443 |
| 0.8900743944082253 | 0.1740591976671788 | 0.9812322672974387 |
| 0.9365544313431541 | 0.1273124499128202 | 0.1952494105166205 |
| 0.8174183808980107 | 0.1730623127453489 | 0.3219924904896500 |
| 0.9219122257382982 | 0.0601511782447436 | 0.8449723491945397 |
| 0.8080354508168341 | 0.0283983038994980 | 0.6956644501794357 |
| 0.7813015681168783 | 0.0601164802663363 | 0.4773513937007522 |
| 0.6217134064388082 | 0.0681294659771831 | 0.4850553245999641 |

**Structure files (CONTCAR) involved in this work:**

|                    |                    |                    |
|--------------------|--------------------|--------------------|
| 0.5660396886590690 | 0.0317972891704829 | 0.6927990999840890 |
| 0.6837593132578954 | 0.0536933044724359 | 0.8259166060497867 |
| 0.9170695789662586 | 0.8305307210226196 | 0.8293016779652435 |
| 0.8065994294674284 | 0.8703859513012621 | 0.6816568256915890 |
| 0.7670234984376451 | 0.8291809395056616 | 0.4684589030894988 |
| 0.6121950769023424 | 0.8269108711353748 | 0.4870907595063721 |
| 0.5622044209133257 | 0.8747360498581065 | 0.6965766581714694 |
| 0.4217543970111177 | 0.4426355955020954 | 0.6529433195714104 |
| 0.3062254823698463 | 0.4714192535335623 | 0.8005625136526817 |
| 0.2810888855973546 | 0.4404919844885042 | 0.0209513341052925 |
| 0.1214749734942524 | 0.4328360555243734 | 0.0151748754773529 |
| 0.0677017786679580 | 0.4685085175204456 | 0.8053371196210884 |
| 0.1829585026727156 | 0.4396098410471814 | 0.6712174285122083 |
| 0.4197712482315053 | 0.6731098787478531 | 0.6709814828106595 |
| 0.3067783827893238 | 0.6308114362767137 | 0.8138991737095077 |
| 0.2688224443274373 | 0.6694812664352267 | 0.0313856962181117 |
| 0.1148061157463500 | 0.6721512046563151 | 0.0150017814733219 |
| 0.0680714740425249 | 0.6257154147006951 | 0.8022410148268087 |
| 0.1863928803001380 | 0.6714191468518740 | 0.6753312715277016 |
| 0.0778911343606439 | 0.5574471953093305 | 0.1514154384965266 |
| 0.1929205144417389 | 0.5299852525651660 | 0.3006441825243216 |
| 0.2204091855793665 | 0.5587519682202579 | 0.5205950725814090 |
| 0.3786248930879483 | 0.5651599922518810 | 0.5143434123910264 |
| 0.4333437881739220 | 0.5298185589276804 | 0.3055542836874208 |
| 0.3172903055871270 | 0.5604237005727954 | 0.1715252164315702 |
| 0.0799772974330050 | 0.3262268556586983 | 0.1732680370176094 |
| 0.1948860736321298 | 0.3707355643916432 | 0.3126209956652306 |
| 0.2334112865651541 | 0.3306615404469365 | 0.5295332920906695 |
| 0.3880393575797124 | 0.3265273853349032 | 0.5172109799089437 |
| 0.4348074268517794 | 0.3727017586465399 | 0.3049493301325101 |
| 0.3168125589932409 | 0.3285821017599911 | 0.1764909102122924 |
| 0.3574554945263482 | 0.0658190640013602 | 0.7235835935458926 |
| 0.3165425724802828 | 0.0578298129619792 | 0.9115293852006946 |
| 0.1995585969872743 | 0.0535879201016902 | 0.0041494110353109 |
| 0.0870112190006091 | 0.0712212990679599 | 0.9028085533078808 |
| 0.1055484274963645 | 0.0593005752623225 | 0.7065617726123036 |
| 0.2297513179275003 | 0.0436245883681005 | 0.7648375282993835 |
| 0.3602746670501605 | 0.8252790990848358 | 0.7547127331155127 |
| 0.3076982725476576 | 0.8521897351659584 | 0.9300440167038888 |
| 0.1909133591693884 | 0.8538270283728872 | 0.0237287507334384 |
| 0.0887018065389755 | 0.8300665487588496 | 0.9033341553390014 |
| 0.1058213088213885 | 0.8429051385742892 | 0.7078877305827237 |
| 0.2302000617639904 | 0.8510877526632592 | 0.7699155118071054 |
| 0.3203579551783698 | 0.9484373367990765 | 0.7942865423747014 |
| 0.0822935443989439 | 0.9510406391844740 | 0.8202954008065906 |
| 0.4315209252675105 | 0.1250016845849371 | 0.5859483574755733 |
| 0.4130411899073060 | 0.9935000777386895 | 0.5745943739543347 |
| 0.3879699681475878 | 0.8617852291221914 | 0.5683350361922218 |
| 0.1992255634665583 | 0.1353273431890525 | 0.6269745589896218 |
| 0.1918898671612027 | 0.0056711618613872 | 0.5816530877923465 |
| 0.2017688296480706 | 0.8718450585470771 | 0.5766706543281015 |
| 0.9869557999231082 | 0.0412437820079136 | 0.7786008098538255 |
| 0.9867320567748723 | 0.8607780572054683 | 0.7882823333829817 |

**Structure files (CONTCAR) involved in this work:**

0.1422826979172369 0.9333670151652557 0.2234272856102825  
0.1816590617804011 0.9409326784921802 0.4113698419337797  
0.2983724144826467 0.9496535352764777 0.5035849153553819  
0.4102778069914677 0.9276141577261199 0.4024015851940821  
0.3945938379731307 0.9434143351595895 0.2056516816403212  
0.2699914953735502 0.9540895433167979 0.2660783455862005  
0.1394233834183055 0.1728624225616421 0.2549769480744839  
0.1914545252650575 0.1470045877499836 0.4304557494572568  
0.3096728146363377 0.1468824704963277 0.5176737792751714  
0.4141272653572431 0.1708704522872710 0.4009919354578149  
0.3938636925322329 0.1550648201877562 0.2068337091839280  
0.2694658285059613 0.1484358699982875 0.2699929818293539  
0.1802053657432133 0.0503386302978256 0.2943759384597890  
0.4175438502195005 0.0486529063070992 0.3236247954859879  
0.0674010229208060 0.8724320417483407 0.0891595348602153  
0.0863284759005038 0.0035313883465820 0.0727834365656632  
0.1050507760394132 0.1358864497325001 0.0706764261109325  
0.3036629692187292 0.8649125162035665 0.1264343368122565  
0.3045989489033681 0.9951587685222094 0.0835102593504902  
0.2976574236051241 0.1291965956387162 0.0757127013307950  
0.5124634354283553 0.9568675649633754 0.2825698653003036  
0.5142455369719149 0.1353934365155468 0.2816082772366795  
0.6417323332947253 0.5642843524043020 0.2750426279606440  
0.6816313283910844 0.5605695373262134 0.0874088843520087  
0.7980643329787176 0.5466789461957161 0.9961649100166194  
0.9077922262695621 0.5731126939935850 0.1013727195143412  
0.8931739869872179 0.5541584993634563 0.2971274116140799  
0.7694493301226255 0.5407715694467210 0.2322276439798115  
0.6382819775644250 0.3270970953691644 0.2467714681165099  
0.6918650932820145 0.3447912187100117 0.0712655631865982  
0.8083399781546351 0.3512983900480371 0.9807680385735007  
0.9128361883280962 0.3291766759171658 0.0995422316971326  
0.8938084916207691 0.3460511526940300 0.2933201852716998  
0.7684853170308298 0.3532783441113735 0.2331522952839214  
0.6777199787945289 0.4480349179902265 0.1958839026965547  
0.9183675352734193 0.4514257458227722 0.1749592120463926  
0.5653724734306580 0.6269447087448667 0.4075478564084294  
0.5888518225052973 0.4969926325037209 0.4300354046191215  
0.6038109878236930 0.3639086996549735 0.4303924708226501  
0.7997102521360785 0.6348069610496706 0.3661568294292851  
0.8009786132353190 0.5058820173709195 0.4185262671896455  
0.7997292221460715 0.3717359070729536 0.4265846125111581  
0.0114851012437180 0.5445688399182254 0.2183688267231444  
0.0142298835231285 0.3640833160428152 0.2174615498630455  
0.8581898233850583 0.4369315701030252 0.7783667933815483  
0.8172407075568316 0.4432691774016360 0.5905358861187793  
0.6996014289581918 0.4430507587335029 0.5006039036201015  
0.5860993029313839 0.4276070412284496 0.5986491683133237  
0.6047657308628455 0.4375530969270613 0.7949406338711478  
0.7297067915169022 0.4521415260298042 0.7378149759424441  
0.8561995968874094 0.6765636544533047 0.7351953955362928  
0.8036371951527878 0.6411442790211798 0.5624719878168190  
0.6878065134217878 0.6458531058906578 0.4709798392958821

**Structure files (CONTCAR) involved in this work:**

|                    |                    |                    |
|--------------------|--------------------|--------------------|
| 0.5870426299999817 | 0.6666763303794093 | 0.5955302926926386 |
| 0.6041852695200871 | 0.6582429547462223 | 0.7918585488743139 |
| 0.7262407187632599 | 0.6514918142090892 | 0.7227522052432999 |
| 0.8145139876380261 | 0.5522676338659472 | 0.7090932157623936 |
| 0.5843494217524234 | 0.5471647292944395 | 0.6847293426078540 |
| 0.9307898979066397 | 0.3778132094891818 | 0.9167704258236669 |
| 0.9153194461093443 | 0.5101786673466481 | 0.9253551447415534 |
| 0.8855025946851828 | 0.6402431718250335 | 0.9381782467417593 |
| 0.6969194296587435 | 0.3603323964649142 | 0.8743127721872820 |
| 0.6911175977596236 | 0.4894790273845893 | 0.9213893787562358 |
| 0.7032470144577062 | 0.6232576349329618 | 0.9175256572191558 |
| 0.4866230390922033 | 0.4572903043000338 | 0.7222450183822994 |
| 0.4855687561826094 | 0.6340462874170556 | 0.7123219591616329 |
| 0.6422140987396191 | 0.9331746455979012 | 0.2766361765490615 |
| 0.6802402502114840 | 0.9453854005203243 | 0.0883256716045280 |
| 0.7986902574396177 | 0.9558436681488216 | 0.0014321385860729 |
| 0.9121983508612904 | 0.9295284502158909 | 0.0960356935846823 |
| 0.8934064412513580 | 0.9393781350820738 | 0.2929527088055794 |
| 0.7698179166223357 | 0.9557190811731205 | 0.2312808627267524 |
| 0.6368232277805371 | 0.1752271915332830 | 0.2400879826032298 |
| 0.6936353526113830 | 0.1431765376742850 | 0.0690460380786847 |
| 0.8137196601300053 | 0.1455596463603015 | 0.9836850744637864 |
| 0.9210769648777407 | 0.1675921734877158 | 0.0925095646749781 |
| 0.8940775416407587 | 0.1601993001367076 | 0.2865037869874716 |
| 0.7680250643818949 | 0.1518600033004403 | 0.2304363873901552 |
| 0.6792834750416532 | 0.0520284069825512 | 0.2120125486445670 |
| 0.9169796681665485 | 0.0484724233703881 | 0.1826293438796997 |
| 0.5677543005354420 | 0.8746832896052132 | 0.4144425738474193 |
| 0.5879447100327545 | 0.0057412546277718 | 0.4259220576198482 |
| 0.6073634189931649 | 0.1377670940833230 | 0.4259373102317764 |
| 0.7974357282089576 | 0.8645297684249842 | 0.3691684547002507 |
| 0.8051677399968126 | 0.9948857149534459 | 0.4143995340267169 |
| 0.8011598869859059 | 0.1292400555136750 | 0.4208469243843182 |
| 0.0123757029484168 | 0.9562032398922052 | 0.2195391414024382 |
| 0.0157182717095176 | 0.1341516485033402 | 0.2201132884060284 |
| 0.8570669755238948 | 0.0669086844420117 | 0.7734809650305229 |
| 0.8187350189632794 | 0.0596265781443099 | 0.5848918715843417 |
| 0.7013646191972511 | 0.0559066931616177 | 0.4934262869912131 |
| 0.5887326959589361 | 0.0747245556321171 | 0.5950051103656652 |
| 0.6067860605237062 | 0.0580389707631618 | 0.7901266091985777 |
| 0.7308234831561888 | 0.0400475487243268 | 0.7290524754661845 |
| 0.8649343542018886 | 0.8275786591882721 | 0.7381774031258240 |
| 0.8113815096380650 | 0.8527970635251738 | 0.5633959602362857 |
| 0.6896129787732234 | 0.8521687136816007 | 0.4836288712488724 |
| 0.5845365954969789 | 0.8293017091297676 | 0.6004911775401980 |
| 0.5994923730119885 | 0.8494611314339533 | 0.7960507194079015 |
| 0.7342998412144497 | 0.8529585192803192 | 0.7253621731184607 |
| 0.8261625870727511 | 0.9491826520106156 | 0.6985430189339863 |
| 0.5804506614505333 | 0.9528865011654479 | 0.6708967583368817 |
| 0.9338790291468099 | 0.1311966987567683 | 0.9016372867253771 |
| 0.9127665621747797 | 0.0027270725810905 | 0.9304932993181740 |
| 0.8874131491891045 | 0.8720469011956892 | 0.9245913019486763 |
| 0.7043492514106919 | 0.1245515051888849 | 0.8765071484570163 |

**Structure files (CONTCAR) involved in this work:**

|                    |                    |                    |
|--------------------|--------------------|--------------------|
| 0.6899200694591614 | 0.9909428104179763 | 0.9032714817512107 |
| 0.7121778277874169 | 0.8618780706100717 | 0.9397816357871409 |
| 0.4877154320704838 | 0.0449025694926139 | 0.7179314152555814 |
| 0.4814821874620751 | 0.8681645701126975 | 0.7105320030711674 |
| 0.3567937785150485 | 0.4339952716027841 | 0.7241224800354803 |
| 0.3178105403417421 | 0.4430092972043536 | 0.9127958834049219 |
| 0.2010033560248532 | 0.4457230655614359 | 0.0067746143696791 |
| 0.0888784933534437 | 0.4268516195049339 | 0.9049505718691653 |
| 0.1059346751667476 | 0.4386855673999760 | 0.7080590733811462 |
| 0.2296850006684613 | 0.4559106994282587 | 0.7677350749989245 |
| 0.3650816590868459 | 0.6737438397848230 | 0.7601638736092146 |
| 0.3094934300323246 | 0.6464663795670227 | 0.9323899186644450 |
| 0.1914397716529873 | 0.6451415985015432 | 0.0221255670688445 |
| 0.0899892116369344 | 0.6693973095228546 | 0.9002923391158246 |
| 0.1102295235821135 | 0.6533115605163865 | 0.7062056348550593 |
| 0.2343153358069306 | 0.6525102818212974 | 0.7697849400993766 |
| 0.3204379061823254 | 0.5516214814334611 | 0.7937928156364197 |
| 0.0869466508365755 | 0.5470324589777831 | 0.8226640005437035 |
| 0.4325067774507633 | 0.3731395676894669 | 0.5911114657018010 |
| 0.4145231659845249 | 0.5043978809563638 | 0.5744598963682181 |
| 0.3895375348639387 | 0.6358040877538689 | 0.5727658831188707 |
| 0.2011311175944524 | 0.3660727565548564 | 0.6269851581716693 |
| 0.1920820499393037 | 0.4967656248494215 | 0.5861925572099290 |
| 0.2074752011484485 | 0.6300588417024171 | 0.5756718073439872 |
| 0.9885903026300089 | 0.4576135013417817 | 0.7834120959963712 |
| 0.9900682304409669 | 0.6348955173712202 | 0.7813478146768277 |
| 0.1412309739617705 | 0.5673691609462974 | 0.2256505961820469 |
| 0.1822815832927125 | 0.5581291859727762 | 0.4132940190582591 |
| 0.2998773141950957 | 0.5481934281734387 | 0.5036634960013793 |
| 0.4121326255057607 | 0.5719908927907953 | 0.4045818299143593 |
| 0.3942643558737576 | 0.5581139652480230 | 0.2083216520111727 |
| 0.2693677568927416 | 0.5454185020347637 | 0.2670846769648198 |
| 0.1375572308605864 | 0.3265540167026029 | 0.2584069692210917 |
| 0.1927413695447888 | 0.3545514171831795 | 0.4309379865682650 |
| 0.3111346626868243 | 0.3531887892793517 | 0.5178217367659755 |
| 0.4169002577099518 | 0.3297830167772754 | 0.4043096386761998 |
| 0.3936695885744863 | 0.3426134253654985 | 0.2102084024346748 |
| 0.2681335582527414 | 0.3514500854167804 | 0.2681557407325850 |
| 0.1789272422456832 | 0.4496813802714028 | 0.2935350155724268 |
| 0.4151910392966554 | 0.4509476856616613 | 0.3235400523078304 |
| 0.0677733747779541 | 0.6257043868150237 | 0.0860824777428397 |
| 0.0873206396969958 | 0.4945600446327410 | 0.0757456886710975 |
| 0.1070218071531707 | 0.3626513069349218 | 0.0726737884529441 |
| 0.3026696171078493 | 0.6350644136285442 | 0.1284848108925269 |
| 0.3060537734901653 | 0.5045406694834798 | 0.0853923678604673 |
| 0.3002926513272163 | 0.3703975562093869 | 0.0755013336112244 |
| 0.5123357136917606 | 0.5393770764047571 | 0.2823241221410885 |
| 0.5142507118345885 | 0.3660460249045772 | 0.2817304522399909 |
| 0.4380924234331844 | 0.7499399439672788 | 0.6414875332826991 |
| 0.1939183275773295 | 0.7505308729623714 | 0.6487157789858461 |
| 0.2728496812060802 | 0.7497098613755568 | 0.0458518316772378 |
| 0.1094687239916219 | 0.7490275187031441 | 0.0554730367206447 |
| 0.0612178029182673 | 0.2493895626745212 | 0.1448328002916399 |



**Structure files (CONTCAR) involved in this work:**

0.3063386277920053 0.2496294823147085 0.1515734531152505  
0.2272045594624601 0.2505147583121367 0.5441991644148910  
0.3916792496151956 0.2494599789720116 0.5562483228552986  
0.5597232141430449 0.2504856127545108 0.3554135700538819  
0.8068016374254804 0.2515239466795872 0.3499671678082631  
0.7281261730804321 0.2447798183589050 0.9505656271177615  
0.8926461973433029 0.2515188626194222 0.9441662821897997  
0.9250359569435097 0.7545191087452155 0.8769859884195416  
0.6954614574964019 0.7457911249406719 0.8613022383978275  
0.7717677922530699 0.7489670700666723 0.4532748120872824  
0.6061206768173846 0.7504868830191098 0.4453461774062347  
0.8023602443487572 0.7511889362112586 0.0887187505828847  
0.9184736864121413 0.6718251108033720 0.8217566799833483  
0.6814615970939811 0.8315279122746958 0.8208923022034886  
0.8646345972562299 0.7344193950046868 0.9952755354327741  
0.7469311350699317 0.7679871064378923 -0.0133587105071988

**Figure S1 Ga/ZSM-5**

1.0000000000000000

20.0219993591000005 0.0000000000000000 0.0000000000000000

0.0000000000000000 19.8990001678000006 0.0000000000000000

0.0000000000000000 0.0000000000000000 13.3830003737999998

Si O Al Ga H

94 192 2 1 1

**Direct**

0.4215988573438575 0.0586802642008117 0.6503754141180886

0.3057837784988079 0.0300751137048940 0.7975997213935381

0.2808386827526301 0.0578622242011981 0.0192480782132676

0.1211295451909348 0.0641372975907686 0.0131134569228907

0.0663851200373345 0.0301303555696156 0.8010878719193447

0.1821626297212952 0.0607616781425822 0.6677447802962562

0.4208731137132491 0.8276029795536324 0.6741423644776674

0.3035139094382814 0.8710347130576148 0.8101617452182069

0.2668530099334541 0.8302916027514808 0.0284240179968314

0.1122059737320055 0.8271226328826082 0.0175596426472350

0.0639784111590990 0.8715668326249958 0.8032713847941930

0.1814867881123789 0.8276061430189630 0.6752979162432535

0.0769786536910187 0.9421634530453007 0.1529163024271764

0.1940669384717698 0.9705699802801665 0.2983505561803902

0.2182692188936985 0.9393245054377659 0.5203998269200758

0.3786395989836860 0.9333899680922791 0.5154634793663316

0.4338474532976512 0.9678190769365218 0.3041645418331260

0.3183550080653628 0.9384548341414894 0.1686317617537308

0.0810367924396914 0.1736177547824150 0.1678574723859179

0.1960043591359210 0.1300312965843662 0.3088240939687376

0.2325977974922947 0.1701556873319178 0.5258141603576070

0.3873314299667655 0.1732975858502790 0.5115012352738141

0.4366785276311608 0.1262372212248083 0.3000959760935504

0.3179325592944469 0.1698965558110027 0.1737882357253015

0.5795252675311524 0.5581751011244166 0.3468385297409294

0.6902468728510677 0.5338307787064300 0.1897583137325660

0.7147032119145378 0.5634065695567215 0.9737715448360011

0.8725880392914634 0.5601225121246780 0.9724768441688426

0.9314917361988571 0.5290352657292129 0.1858791446687498

**Structure files (CONTCAR) involved in this work:**

|                    |                    |                    |
|--------------------|--------------------|--------------------|
| 0.8144471241863960 | 0.5613382740101376 | 0.3172821476656136 |
| 0.5774612342656978 | 0.3285577881714269 | 0.3271851869153266 |
| 0.7017523460562930 | 0.3764718820924262 | 0.2066531247052875 |
| 0.7355750710552389 | 0.3294245359802394 | 0.9840723040545333 |
| 0.8877786264288950 | 0.3269184631593856 | 0.9757087711332292 |
| 0.9364440302376648 | 0.3713701144128843 | 0.1922919188299109 |
| 0.9242565165328185 | 0.4372472525406090 | 0.8324446342033187 |
| 0.7809541942907751 | 0.4425448139476825 | 0.4724030885928637 |
| 0.6207038730270276 | 0.4327476329336566 | 0.4861282674515355 |
| 0.5658220542482955 | 0.4687563229744490 | 0.7003264237625115 |
| 0.6739830420736646 | 0.4359742036834522 | 0.8438002304300701 |
| 0.9174886775511490 | 0.6741607733966880 | 0.8258234488932598 |
| 0.8013354287060999 | 0.6365870331467712 | 0.6919628270607532 |
| 0.7658995968211582 | 0.6658266868048380 | 0.4723811072123052 |
| 0.6111697202761087 | 0.6716067211617095 | 0.4861806346304878 |
| 0.5639828849433705 | 0.6270502717224009 | 0.7021057885514997 |
| 0.6823401729241081 | 0.6795712699335128 | 0.8222328560653512 |
| 0.5780391988516220 | 0.9425604383706463 | 0.3555477083924087 |
| 0.6949413916732128 | 0.9709810640793998 | 0.2099380957567644 |
| 0.7205983503111868 | 0.9439528974869866 | 0.9884274720934331 |
| 0.8797721495640596 | 0.9354068181703207 | 0.9924127279229823 |
| 0.9327161967622033 | 0.9702195589722209 | 0.2029028239211297 |
| 0.8186654619863845 | 0.9392352844200488 | 0.3433058268715298 |
| 0.5802972594381192 | 0.1738770478000706 | 0.3270176814638818 |
| 0.6969294968076413 | 0.1289675033213932 | 0.1914358746926359 |
| 0.7338549497430928 | 0.1701357626302481 | 0.9732330649472608 |
| 0.8883182735017503 | 0.1727099326518857 | 0.9846582366848687 |
| 0.9361107136906153 | 0.1285984575741515 | 0.1979888647278865 |
| 0.8183200851078168 | 0.1692869043719613 | 0.3290492955253925 |
| 0.9234421998225203 | 0.0556118300986137 | 0.8532142204156897 |
| 0.8047867113339511 | 0.0268250035662102 | 0.7083826983619443 |
| 0.7809683148549198 | 0.0578168772680034 | 0.4880190612381703 |
| 0.6205318358034968 | 0.0683915864663750 | 0.4881301573983512 |
| 0.5665572029003514 | 0.0335370542966723 | 0.6978059935075366 |
| 0.6806015612309957 | 0.0594478901915000 | 0.8404472503211623 |
| 0.9188103808380547 | 0.8264551712291859 | 0.8358595898842748 |
| 0.8044844683705165 | 0.8682391467991837 | 0.6909789538688244 |
| 0.7686459511654300 | 0.8262089038918020 | 0.4743949704695447 |
| 0.6140234716704785 | 0.8264069697834495 | 0.4913117737312761 |
| 0.5646563591653002 | 0.8762771325815285 | 0.6998991262187689 |
| 0.6821016398906418 | 0.8349147148360085 | 0.8289513490497151 |
| 0.4196659670814453 | 0.4424502704210115 | 0.6458722559539375 |
| 0.3078211463554895 | 0.4685504744231417 | 0.7976127377498895 |
| 0.2822418065895961 | 0.4405237107735311 | 0.0182741301379826 |
| 0.1243639241367178 | 0.4346740851610856 | 0.0075998961122694 |
| 0.0709734313803943 | 0.4716760645918570 | 0.7984423145050807 |
| 0.1864512814126708 | 0.4422452780126380 | 0.6632198041060429 |
| 0.4214632450656901 | 0.6734669744858983 | 0.6720547150771012 |
| 0.3034087293345058 | 0.6271779248073220 | 0.8053592370567353 |
| 0.2667486211301822 | 0.6698373280690371 | 0.0236546173365009 |
| 0.1122956283685412 | 0.6736201735876834 | 0.0130273334624979 |
| 0.0635530421965819 | 0.6294416866583451 | 0.8019019191555254 |
| 0.1807089041323447 | 0.6695985769764596 | 0.6707763095384831 |

**Structure files (CONTCAR) involved in this work:**

0.0762345147198733 0.5556890594266762 0.1441754288629964  
0.1935392806453658 0.5283724202857523 0.2921692666105721  
0.2197630806392563 0.5629655493713792 0.5114168623938714  
0.3795244368286168 0.5698741688263131 0.5095707921880677  
0.4348049302169106 0.5310348843083313 0.3009196249102372  
0.3196698338592712 0.5605726203795457 0.1649223290645953  
0.0828382206965063 0.3273235227912762 0.1616833748243313  
0.1955636755923546 0.3687396064240466 0.3076920352346472  
0.2320135031032804 0.3302216667276666 0.5251772406475531  
0.3865096615764703 0.3273308770304802 0.5093970506121351  
0.4335960178770544 0.3736002445395529 0.2970692257340737  
0.3161208565801364 0.3276142614283539 0.1721804549065758  
0.3572865641035727 0.0677895946209365 0.7229317771148464  
0.3164117852489964 0.0577113558944655 0.9102829476797734  
0.2006986939048927 0.0501122165496739 0.0075690079059001  
0.0900114016088463 0.0687560864222858 0.9018029567219416  
0.1051163295899821 0.0608428486807162 0.7048701988315450  
0.2293673930972218 0.0457257402604313 0.7641074598371040  
0.3610650588261662 0.8270579551885607 0.7559476922070976  
0.3055598925872152 0.8550413752257952 0.9285554255957377  
0.1890816914505201 0.8536686998385208 0.0219220740112744  
0.0856552425557939 0.8316410849357567 0.9036811451542908  
0.1040905092264217 0.8393959179550704 0.7086874586106643  
0.2299743824916311 0.8519044345904411 0.7664056008966335  
0.3196594575421175 0.9497668729643785 0.7903250043576587  
0.0830476115645993 0.9505177778294864 0.8134858281414623  
0.4316849069708645 0.1272165749226382 0.5861049050979565  
0.4127100934338069 0.9959299955093464 0.5739959975368368  
0.3958473707087454 0.8632822167683185 0.5716770111429400  
0.1995713957924441 0.1341600814489377 0.6223070863777340  
0.1916395530235288 0.0033555934553541 0.5832847350900390  
0.1972922142908752 0.8692546345615793 0.5738456631617447  
0.9873081322818484 0.0424392550642648 0.7811150189063230  
0.9840183750373802 0.8629149944830542 0.7868725026501128  
0.1418550556851226 0.9332792329181585 0.2243648176104365  
0.1840129211793652 0.9418083968224029 0.4106026088007347  
0.2986632488929810 0.9444910329156796 0.5111263141683724  
0.4086489879790830 0.9285021079856222 0.4035471235733039  
0.3951652504842514 0.9390476640920520 0.2066362219305192  
0.2702837126358939 0.9551975717421860 0.2635143416946806  
0.1403893277890177 0.1739507796848494 0.2504520604295112  
0.1916631472314460 0.1480429672879142 0.4265500136593162  
0.3101769943784937 0.1471053290127572 0.5136750412129036  
0.4161351382544205 0.1689219151568992 0.3987503709135599  
0.3952315992286110 0.1552365604742645 0.2046334986597241  
0.2704182749483837 0.1481250637502635 0.2675228403060796  
0.1800173264311104 0.0508790609006875 0.2921401154720393  
0.4185907598160307 0.0476017401861676 0.3180254180306241  
0.0662530780963906 0.8727827122184098 0.0906604549666852  
0.0856928250794467 0.0034802320687111 0.0741010667902612  
0.1062294527268347 0.1351848215893995 0.0677255100424806  
0.3017493962512408 0.8641943598663916 0.1252495749198058  
0.3090571175181649 0.9943836006991477 0.0818869039448250

**Structure files (CONTCAR) involved in this work:**

|                    |                    |                    |
|--------------------|--------------------|--------------------|
| 0.2986364684210868 | 0.1281177096340421 | 0.0740521241743805 |
| 0.5127613463437052 | 0.9540359596258644 | 0.2857518876993363 |
| 0.5161337177110973 | 0.1348755513736537 | 0.2790555263299290 |
| 0.6420516030544343 | 0.5689202973761598 | 0.2719466635254823 |
| 0.6776239297679919 | 0.5686080748692317 | 0.0817433431596956 |
| 0.7936993090398522 | 0.5477204346370298 | 0.9907557402516610 |
| 0.9121219884822070 | 0.5615917291563235 | 0.0781252733520406 |
| 0.8909298566907955 | 0.5634449919546332 | 0.2782681602571708 |
| 0.7672625638596966 | 0.5493422549824866 | 0.2210039437742271 |
| 0.6385398805206967 | 0.3338763604300333 | 0.2493398204792919 |
| 0.7212842114810062 | 0.3410729403405348 | 0.1013432177664096 |
| 0.8118120275558982 | 0.3550129957062024 | 0.9603517070546349 |
| 0.9125044483236212 | 0.3334822151249963 | 0.0898370193254319 |
| 0.9035307967780039 | 0.3387287677176176 | 0.2895644147521551 |
| 0.7631109228589019 | 0.3758439604101937 | 0.2843919500697315 |
| 0.6765644457278213 | 0.4534900989093682 | 0.1858421869024963 |
| 0.9145087852192244 | 0.4498479674185727 | 0.1806993603260072 |
| 0.5667639332365438 | 0.6272868939806586 | 0.4087175329782416 |
| 0.5942739621588632 | 0.4982369770611819 | 0.4264939964771043 |
| 0.5960327578643793 | 0.3641602490498311 | 0.4333686900284822 |
| 0.7978308065889809 | 0.6310609014208356 | 0.3737629295012536 |
| 0.8039576866116229 | 0.4994539454345243 | 0.3958535928086523 |
| 0.8259609074669283 | 0.3721919619887978 | 0.4649622856351424 |
| 0.0097315004968381 | 0.5430829435855142 | 0.2106456801981136 |
| 0.0178172106600350 | 0.3684346818271909 | 0.1994287715331091 |
| 0.8696788515604116 | 0.4244890102305957 | 0.7396513650761268 |
| 0.8151329956491379 | 0.4632438459668475 | 0.5831974011834461 |
| 0.7024152375769315 | 0.4341243207484549 | 0.4869523307344643 |
| 0.5938554051494632 | 0.4329787980238807 | 0.5995277690773078 |
| 0.5986215510849145 | 0.4337516626256200 | 0.7979761594406006 |
| 0.7275585223217768 | 0.4377634048758006 | 0.7538229536959902 |
| 0.8631490336731225 | 0.6804379226103804 | 0.7363863033020177 |
| 0.8062638625757997 | 0.6392040943201485 | 0.5702443031717336 |
| 0.6878393568438849 | 0.6438069683512158 | 0.4838347603724920 |
| 0.5812685648466893 | 0.6648441173860337 | 0.5979399844371928 |
| 0.6054713440260865 | 0.6617002850763291 | 0.7928091033498342 |
| 0.7295764047206456 | 0.6696110001030827 | 0.7237643479787176 |
| 0.8067769567320192 | 0.5613929853307330 | 0.7355651163935328 |
| 0.5846244559269215 | 0.5482863864376668 | 0.6943581817011512 |
| 0.9347012234466772 | 0.3701466985644219 | 0.8989091095560056 |
| 0.8989072276165605 | 0.4985624725666474 | 0.9016608664536834 |
| 0.8869519271210135 | 0.6316364053878079 | 0.9188340707223783 |
| 0.6836312872638028 | 0.3700634837397217 | 0.9140073526354489 |
| 0.6801171970852163 | 0.5032525986148287 | 0.9120285697585677 |
| 0.7070394287325821 | 0.6339470267483218 | 0.9151070470483649 |
| 0.4858157867235391 | 0.4591740829269420 | 0.7103567654618316 |
| 0.4843798343375103 | 0.6349507820478929 | 0.7241530857425107 |
| 0.6430240182815583 | 0.9336993110331027 | 0.2844632012857891 |
| 0.6896116049157760 | 0.9372111008814829 | 0.0999137698100841 |
| 0.8009959904884287 | 0.9542296102737905 | 0.9922908735810448 |
| 0.9067793689961037 | 0.9282232405581943 | 0.1060222610696399 |
| 0.8949953280105549 | 0.9445635583442695 | 0.3033475478102230 |
| 0.7706137567208939 | 0.9610811659653073 | 0.2508875974836184 |

**Structure files (CONTCAR) involved in this work:**

|                    |                    |                    |
|--------------------|--------------------|--------------------|
| 0.6407783741576453 | 0.1742736001896563 | 0.2467634093283169 |
| 0.6949497865461810 | 0.1472271919942505 | 0.0736513394813467 |
| 0.8114792779986146 | 0.1461372778676886 | 0.9813453325950704 |
| 0.9156520885097761 | 0.1705047754184885 | 0.0983219716209633 |
| 0.8958033540549748 | 0.1578762348496373 | 0.2934153851300736 |
| 0.7707218760594845 | 0.1434295558774148 | 0.2367233402190546 |
| 0.6768053011822792 | 0.0504090346927006 | 0.2065603454443671 |
| 0.9186341123917291 | 0.0494642665610459 | 0.1819957450954095 |
| 0.5684990544241535 | 0.8741019649248061 | 0.4204013586061258 |
| 0.5846196590529616 | 0.0058373256893855 | 0.4316186902308971 |
| 0.6039629634610046 | 0.1380164128191994 | 0.4302376060312287 |
| 0.8029989541267024 | 0.8625442634700747 | 0.3785637296512981 |
| 0.8081422687329964 | 0.9883958439755347 | 0.4387006543307758 |
| 0.8057109892907861 | 0.1226910580481751 | 0.4270294303138792 |
| 0.0117549971335429 | 0.9562656825579718 | 0.2215079994984286 |
| 0.0160219866799156 | 0.1373017288763291 | 0.2167922741167580 |
| 0.8566764833198159 | 0.0616579511433052 | 0.7854313917218364 |
| 0.8109692125854958 | 0.0633173304114408 | 0.6006174968507784 |
| 0.7000946466149982 | 0.0547793094358061 | 0.4909717725205787 |
| 0.5916642406913567 | 0.0757658140099161 | 0.6008669106363710 |
| 0.6047168967280727 | 0.0583126288845756 | 0.7982250954807008 |
| 0.7290675005867849 | 0.0354215955317805 | 0.7496770396345898 |
| 0.8595380835950025 | 0.8265904884129743 | 0.7537605252714578 |
| 0.8092706840613587 | 0.8452106059009460 | 0.5753415918830083 |
| 0.6914782397149657 | 0.8512725872355438 | 0.4857910514344287 |
| 0.5874528724017760 | 0.8300279924724479 | 0.6057438197872764 |
| 0.6053855049492989 | 0.8530287581969458 | 0.7991282820952937 |
| 0.7298345254318147 | 0.8528661432383301 | 0.7337223606910269 |
| 0.8221062599138754 | 0.9474688976363855 | 0.7003256075746567 |
| 0.5810678506544436 | 0.9544135726715849 | 0.6754691857604592 |
| 0.9340858955626508 | 0.1259630717973404 | 0.9126526606879004 |
| 0.9195448497599114 | 0.9949249232084545 | 0.9344317029510933 |
| 0.8939681290643109 | 0.8643030283770879 | 0.9368004010378033 |
| 0.6992391660290554 | 0.1350667551711119 | 0.8765152607529421 |
| 0.6868422153380713 | 0.0086935629552320 | 0.9349590257445702 |
| 0.7042212691541655 | 0.8758938649366270 | 0.9275994685187137 |
| 0.4875962359280848 | 0.0464072915961735 | 0.7180771447351502 |
| 0.4851805317523698 | 0.8667388042604338 | 0.7206631002055092 |
| 0.3579425821827213 | 0.4296739316724025 | 0.7221924635007867 |
| 0.3177105871873189 | 0.4387546476921688 | 0.9092235857381611 |
| 0.2028413204179911 | 0.4544643098489173 | 0.0057683600759407 |
| 0.0959436497855950 | 0.4284530867442726 | 0.8941516535131255 |
| 0.1087703690346872 | 0.4493909169140247 | 0.6964698204052078 |
| 0.2310678286041263 | 0.4556674363426900 | 0.7626882040011512 |
| 0.3583678422335161 | 0.6723516569512640 | 0.7478815716731800 |
| 0.3047042402707238 | 0.6478305100988576 | 0.9219705841558353 |
| 0.1890026885657053 | 0.6464877010509026 | 0.0161785809117920 |
| 0.0854962444108933 | 0.6730452897371118 | 0.8987237914937172 |
| 0.1035591446938264 | 0.6570596817974255 | 0.7045357962128768 |
| 0.2294011058040820 | 0.6405789248318114 | 0.7586531350333408 |
| 0.3236651463167659 | 0.5486075034850896 | 0.7930334973815469 |
| 0.0818799596806962 | 0.5509035733015962 | 0.8218712735330941 |
| 0.4322093964099540 | 0.3747023556712580 | 0.5806915467013065 |

**Structure files (CONTCAR) involved in this work:**

0.4039063883986899 0.5041900983292090 0.5707197666957452  
0.4012157816599737 0.6378864505760060 0.5673529301314012  
0.1986546539529089 0.3668341398055497 0.6213603159346982  
0.2034150403627830 0.4963575151506183 0.5766876788069539  
0.1934547922624403 0.6305104530090043 0.5662667395392801  
0.9927649103181915 0.4558347197037047 0.7750174191206046  
0.9839556469125129 0.6368968120993618 0.7822016980956421  
0.1405234283094591 0.5635435342303777 0.2171054236124520  
0.1820633571688983 0.5569603893556389 0.4044080928345278  
0.2994868328010509 0.5675361088568406 0.4950343950732513  
0.4149248077778660 0.5717723381054024 0.4013139834415476  
0.3958066850519697 0.5627881366334592 0.2058659602987528  
0.2695530818786452 0.5452457478947489 0.2579869834960504  
0.1386144906010724 0.3264241613144502 0.2498262977729864  
0.1906526582297478 0.3520240426651307 0.4259179129887342  
0.3094694035475118 0.3538134244957039 0.5137321864360619  
0.4128471323293582 0.3305304817036034 0.3952314926048980  
0.3932734482507978 0.3447685965251450 0.2005868385337911  
0.2695622988274305 0.3482335764130602 0.2675537180853400  
0.1815779630751945 0.4478662234577200 0.2880417814833297  
0.4149929361038178 0.4522603980372561 0.3149499896933206  
0.0665152554312885 0.6252212540784705 0.0821189989916633  
0.0841289984544844 0.4936201195596863 0.0659601020869424  
0.1136116899102414 0.3625290994651035 0.0617108564145654  
0.3022677140338483 0.6333438339489961 0.1176121599076174  
0.3143901283125158 0.5018091119520461 0.0815127045934817  
0.2942697445191257 0.3689607148972252 0.0729935576251655  
0.5142663231707729 0.5395461432035440 0.2807254519923554  
0.5129944069128424 0.3654095910046787 0.2769586885760247  
0.4410066840174630 0.7507362457914728 0.6479563256912413  
0.1944689626875894 0.7487325005881044 0.6519772763542344  
0.2722526402332727 0.7498336329579004 0.0403912172018449  
0.1078783588719056 0.7497703124482122 0.0554426797726719  
0.0632778132273377 0.2502127621712898 0.1356721850952164  
0.3074805624603403 0.2485889192543911 0.1474237456859367  
0.2271018092349940 0.2502701841181285 0.5428924022358473  
0.3915153081278737 0.2506349017954704 0.5493721260990425  
0.5600047462049099 0.2508688748011879 0.3520769219630662  
0.8038796228979017 0.2455545084755558 0.3588022400102304  
0.7291144084284658 0.2504223391633071 0.9573839663223561  
0.8926412804913573 0.2489009018051261 0.9419085812387853  
0.9363984477643256 0.7491006574729958 0.8649996654722240  
0.6878170938658338 0.7565941287374132 0.8589783922070920  
0.7720988720414129 0.7459704018395519 0.4570456756719388  
0.6079156700941182 0.7495938958258208 0.4517540068750617  
0.8254325448896837 0.3281678121301780 0.3420490208556460  
0.7975539080892488 0.4778108801715653 0.7141952727116185  
0.8817485571028997 0.3943487534213300 0.5922363080895073  
0.9496856977722237 0.3588301523258075 0.5831914512548976

**Figure S1 Mn/ZSM-5**

1.0000000000000000  
20.0219993591000005 0.0000000000000000 0.0000000000000000  
0.0000000000000000 19.8990001678000006 0.0000000000000000

**Structure files (CONTCAR) involved in this work:**

```
0.0000000000000000 0.0000000000000000 13.3830003737999998
Si O Al C Mo
94 192 2 2 4
Direct
0.4236882982128091 0.0572890417265526 0.6509802815660809
0.3060258975753334 0.0294188671986075 0.7969349981040565
0.2810209771346244 0.0597435781119435 0.0188893422734555
0.1208043541403034 0.0669946809794368 0.0151647267950513
0.0658106205874458 0.0319492926751955 0.8046031048878237
0.1808379394706887 0.0624561905691111 0.6690354920785270
0.4178458908454785 0.8276580615606938 0.6676580986391090
0.3049947709415469 0.8697973351486209 0.8103894017573682
0.2698237490381946 0.8306722249785006 0.0285764602455915
0.1155357047830179 0.8270582294630204 0.0144367943468895
0.0679915464158978 0.8742743544140256 0.8026217571750481
0.1845275618438390 0.8299493510055843 0.6734664490356858
0.0792909636928598 0.9413485752632023 0.1511007758633832
0.1947056718724792 0.9698874973169784 0.2980518923473165
0.2190899520415281 0.9434487148833889 0.5199295680141333
0.3776428165764414 0.9355407762837300 0.5130077501776265
0.4345245414278080 0.9693343984401825 0.3032133482022416
0.3186125710054011 0.9395967036421946 0.1687839207879918
0.0796298165678901 0.1734292060591211 0.1740398107884734
0.1969811933926466 0.1287313185887783 0.3086359523106817
0.2332045957543395 0.1693219406430839 0.5263173841969440
0.3879117226288145 0.1729548230604016 0.5150852895727481
0.4369872505266237 0.1276576060931176 0.3029287725492453
0.3193175163078041 0.1709837289562965 0.1739044042278743
0.5777023308093920 0.5578822940742253 0.3528212966586199
0.6915961196923150 0.5262701450446551 0.2045622335471703
0.7152347671470790 0.5590946056951156 0.9837402284113460
0.8745471010189040 0.5681410342147577 0.9835275989022040
0.9325247757779107 0.5350519679173328 0.1911996885814252
0.8165496206216769 0.5575193156308024 0.3306111955975379
0.5813004965721942 0.3262844801014831 0.3318331648425061
0.6940846613004776 0.3692589124901223 0.1903292180370604
0.7325837148956056 0.3294853120986862 0.9738408502876085
0.8874121049413884 0.3273378007046936 0.9863771613849239
0.9355931982998793 0.3771134952450228 0.1956109509924222
0.8176793050684050 0.3328190643377825 0.3234352949747223
0.9209327802021839 0.4431400799530193 0.8502263289681599
0.8051320448039386 0.4684545938222356 0.7033745228098189
0.7805099765960952 0.4412195097991766 0.4826043006899536
0.6212172488901384 0.4353260869857931 0.4888813482243389
0.5662782283257444 0.4682131581516732 0.6995036008780515
0.6813893232202892 0.4378972133574874 0.8349244475920982
0.9217937525665908 0.6735139902608837 0.8262461534444349
0.7650428103736554 0.6704146757851779 0.4638068461507022
0.6121179858629886 0.6730086653146412 0.4889994270542983
0.5613948332372153 0.6264702525767867 0.7000155972039991
0.6759658964514064 0.6733903003545324 0.8314126187454520
0.5786176838083010 0.9427695338753737 0.3532207421628190
0.6938337657077581 0.9755645645859036 0.2068111116643786
```

**Structure files (CONTCAR) involved in this work:**

|                    |                    |                    |
|--------------------|--------------------|--------------------|
| 0.7166310402988559 | 0.9406921833255101 | 0.9849957034775603 |
| 0.8765569129596178 | 0.9314948263681290 | 0.9864462842166491 |
| 0.9346149735497807 | 0.9673225951945601 | 0.1965665041244133 |
| 0.8184854559342785 | 0.9425017296624628 | 0.3320357460309789 |
| 0.5815041950481051 | 0.1741668425887933 | 0.3316575071069814 |
| 0.6956495073559376 | 0.1331637975767515 | 0.1915054572001434 |
| 0.7329034273775121 | 0.1690608733785477 | 0.9745812189327289 |
| 0.8876496844743915 | 0.1724983490838058 | 0.9881631313548410 |
| 0.9360902437165650 | 0.1260355662605637 | 0.2006480939457744 |
| 0.8175148228078579 | 0.1739612988280496 | 0.3228951112895280 |
| 0.9191142849247993 | 0.0579328084932223 | 0.8493347553452040 |
| 0.8063426973164686 | 0.0345634286271610 | 0.6977710364038262 |
| 0.7815283057148454 | 0.0624895724831578 | 0.4786199590662285 |
| 0.6227914163822862 | 0.0655050577574851 | 0.4882693128756292 |
| 0.5686369871144983 | 0.0316747591321845 | 0.6988097056659982 |
| 0.6848252403868177 | 0.0615966517794915 | 0.8313559877572095 |
| 0.9230384309494097 | 0.8265082175503087 | 0.8283701350306444 |
| 0.7661736723174448 | 0.8281876220045580 | 0.4680654642717010 |
| 0.6133312181800010 | 0.8270769297374169 | 0.4901255272174261 |
| 0.5622807499853846 | 0.8743866642225954 | 0.6990777524657191 |
| 0.6732537500894179 | 0.8293735651686149 | 0.8357647545001212 |
| 0.4220454591245748 | 0.4427611488883550 | 0.6494189088111947 |
| 0.3044102996731391 | 0.4706029420559630 | 0.7948627117115415 |
| 0.2812397662584472 | 0.4396214577545624 | 0.0172940137867094 |
| 0.1208172636132296 | 0.4331326904072358 | 0.0131019309419221 |
| 0.0671844341097943 | 0.4693779609813219 | 0.7997007387999494 |
| 0.1806759546828098 | 0.4376977534839552 | 0.6651659346811176 |
| 0.4179019266022360 | 0.6738565536568139 | 0.6667925716810970 |
| 0.3017587556651443 | 0.6303403335850762 | 0.8060763678042455 |
| 0.2706347850753500 | 0.6702765910059069 | 0.0262494551213533 |
| 0.1171193997550005 | 0.6726161520067577 | 0.0111586493211735 |
| 0.0680869245008555 | 0.6266823912321889 | 0.8002448368059131 |
| 0.1823136395918693 | 0.6723663462213146 | 0.6703486818906869 |
| 0.0778898008402450 | 0.5588988128479188 | 0.1478631656661762 |
| 0.1940609360785014 | 0.5315358022902046 | 0.2946719629936023 |
| 0.2180992826286531 | 0.5582647774459291 | 0.5173940616499429 |
| 0.3781871036684564 | 0.5658720125715645 | 0.5116427053176406 |
| 0.4342527563787438 | 0.5298172992243297 | 0.3018961283574523 |
| 0.3193059555656442 | 0.5603532623838183 | 0.1654220373627042 |
| 0.0788210870722010 | 0.3277199727427006 | 0.1703984654031946 |
| 0.1967609254290927 | 0.3720761246499252 | 0.3062441379342138 |
| 0.2332125912292032 | 0.3300661789529087 | 0.5234960963831119 |
| 0.3878979049894078 | 0.3266041771475630 | 0.5135725019270987 |
| 0.4370213962055111 | 0.3717794221451710 | 0.3018424858036485 |
| 0.3193799014740332 | 0.3288919656941107 | 0.1723147619905359 |
| 0.3589206176747878 | 0.0658413302424704 | 0.7231028109357536 |
| 0.3165052811380931 | 0.0568000310646831 | 0.9099183704329392 |
| 0.2006383125146129 | 0.0561131644851149 | 0.0069642309406395 |
| 0.0883499079815300 | 0.0717303382235889 | 0.9048712655703377 |
| 0.1042729027156375 | 0.0633460564889601 | 0.7085029936674564 |
| 0.2299132063718013 | 0.0461965673105313 | 0.7629278818572200 |
| 0.3611477563987285 | 0.8256216123495039 | 0.7542934116415746 |
| 0.3090722064247243 | 0.8544064809023354 | 0.9287807247269024 |



**Structure files (CONTCAR) involved in this work:**

0.1920725029440083 0.8541706374914471 0.0204801367957810  
0.0895787481133980 0.8314131758401633 0.9003616815205507  
0.1075676213334401 0.8434574182396929 0.7064565018153135  
0.2314514445812201 0.8480411800662766 0.7688784452223836  
0.3183173923698424 0.9488068452636630 0.7893717625706409  
0.0864136344651201 0.9529805189504907 0.8173851611004271  
0.4333496046943016 0.1261062939872630 0.5870363472861225  
0.4156338563998064 0.9945593707183334 0.5741675576462725  
0.3877004989276691 0.8634864984049642 0.5680433014801932  
0.1984279494313671 0.1358980829062792 0.6236074134835377  
0.1882817300826929 0.0049563970448633 0.5839288296609129  
0.2046786062053753 0.8722013178997856 0.5750420957469696  
0.9863313902650925 0.0404420528840905 0.7860405501066360  
0.9887060992323721 0.8653551684785863 0.7846430257898314  
0.1431695114589757 0.9314189074006786 0.2240908417928689  
0.1833147815748648 0.9429409151909136 0.4110699711276419  
0.2988143123602325 0.9541961034267846 0.5073448716569045  
0.4086768224604375 0.9292044903386448 0.4016988991180766  
0.3957486520067599 0.9426054878389313 0.2044518026235312  
0.2711240316956616 0.9537526560037155 0.2652788481139775  
0.1400123046420373 0.1736565777431307 0.2548609725738113  
0.1943506666849524 0.1433907404139846 0.4273024594967472  
0.3109926436338017 0.1463022966675783 0.5192628582322588  
0.4148736930170933 0.1698516925227289 0.4011886522714587  
0.3963648336497439 0.1570318821670849 0.2068221957113231  
0.2705765487531993 0.1478975105305670 0.2655135684790053  
0.1806339638033990 0.0500201454198880 0.2879374871188750  
0.4191781795880303 0.0488897653755077 0.3195612741294012  
0.0690383471494582 0.8723789537438955 0.0873719268305693  
0.0880211846785021 0.0040491741644792 0.0749428583224700  
0.1041261872304070 0.1368893361141875 0.0719625253984284  
0.3040157806041660 0.8649258666447489 0.1253727210589456  
0.3054968866847310 0.9952354196668892 0.0827758378961879  
0.3022777950500881 0.1293846896591392 0.0729054922467556  
0.5132382790894892 0.9550926524506459 0.2837601680934025  
0.5166334560870232 0.1362632915204346 0.2841416488716775  
0.6435653745142614 0.5653034109738274 0.2830681582120063  
0.6810092755996088 0.5573164152930358 0.0940171151685991  
0.7957114138837552 0.5549549914227551 0.9967832529091578  
0.9093304807510122 0.5770710977635803 0.0926064476810666  
0.8927405710503369 0.5601333206419654 0.2897859635497532  
0.7692634529094602 0.5344755103955350 0.2378997800234998  
0.6403284302675454 0.3231383833537747 0.2490206523801172  
0.6914487748125837 0.3522854966029862 0.0725280795308876  
0.8102715379596540 0.3535265889250256 0.9827320481713021  
0.9146273778591573 0.3312577240791086 0.1004627005793187  
0.8940909782216857 0.3527063260056696 0.2936190004584442  
0.7693423814617938 0.3541144987231133 0.2306349792892465  
0.6727362631391646 0.4469462124116989 0.2084246559353861  
0.9195028432088195 0.4554056800225295 0.1709792845471292  
0.5671462305130157 0.6276129730907857 0.4138558495871857  
0.5831555214125846 0.4963566088864891 0.4320743525437031  
0.6070272223217820 0.3650825181663732 0.4312091272937894

**Structure files (CONTCAR) involved in this work:**

|                    |                    |                    |
|--------------------|--------------------|--------------------|
| 0.7949673798985555 | 0.6322376663313263 | 0.3665960980152692 |
| 0.8119434289682629 | 0.5051085582024333 | 0.4231470989054555 |
| 0.7959838624546965 | 0.3715716247330591 | 0.4244268898243970 |
| 0.0110791321097537 | 0.5490105219377232 | 0.2140959854698891 |
| 0.0150575132945555 | 0.3673823584582561 | 0.2176496408533477 |
| 0.8580995025002376 | 0.4303247495182740 | 0.7768299821635567 |
| 0.8142649033537822 | 0.4364540861560692 | 0.5920454735437319 |
| 0.7003304974317681 | 0.4520202259798789 | 0.4908322725146200 |
| 0.5917224437323326 | 0.4278018199872969 | 0.6010043181821846 |
| 0.6041947768777036 | 0.4404292933776547 | 0.7980606276966513 |
| 0.7289203801241082 | 0.4524994717747071 | 0.7394408243779409 |
| 0.8731187583438007 | 0.6735081591287452 | 0.7280713675183808 |
| 0.8110482968697106 | 0.6543314155379983 | 0.5612975444096292 |
| 0.6890272822987779 | 0.6456024219176515 | 0.4873203000845355 |
| 0.5828552781920135 | 0.6687782097500521 | 0.6013606001423952 |
| 0.5991037571403885 | 0.6556490147872955 | 0.7976772324185559 |
| 0.7266848965724761 | 0.6595407014047813 | 0.7405912000185646 |
| 0.8180595427251581 | 0.5474796535140134 | 0.7061438630162024 |
| 0.5802669815244786 | 0.5478910099608402 | 0.6826064964426068 |
| 0.9332070406693674 | 0.3745607329779173 | 0.9144988702395960 |
| 0.9094042929568713 | 0.5052936530888241 | 0.9270096853143769 |
| 0.8853566027412281 | 0.6371302102629196 | 0.9198277725143710 |
| 0.6974141951663111 | 0.3632203166465275 | 0.8773771080038945 |
| 0.6914260359882496 | 0.4930385232901918 | 0.9227141256599429 |
| 0.6937353093374576 | 0.6278674103906036 | 0.9292527960513450 |
| 0.4871201564844403 | 0.4549636514421396 | 0.7186366869707653 |
| 0.4808435244585962 | 0.6343835322982325 | 0.7160978862110132 |
| 0.6442281332383720 | 0.9358486694459022 | 0.2824471190081225 |
| 0.6811578471268626 | 0.9514425396112094 | 0.0932069090695741 |
| 0.7967628319856188 | 0.9353149921726337 | 0.0010107991593436 |
| 0.9126636651269994 | 0.9288495195861060 | 0.0950973906380881 |
| 0.8952961995964011 | 0.9355731113787211 | 0.2923765841679931 |
| 0.7712385437800657 | 0.9605698844707103 | 0.2370841817912390 |
| 0.6393889759267095 | 0.1780080606930355 | 0.2470050667860446 |
| 0.6910564890058746 | 0.1446648621104637 | 0.0721533059875821 |
| 0.8106585875814309 | 0.1458209674931606 | 0.9861647155194307 |
| 0.9160701357649332 | 0.1683302896937026 | 0.1015682154843046 |
| 0.8945328911427960 | 0.1546572245861889 | 0.2959152513611691 |
| 0.7703887476110226 | 0.1545983736830745 | 0.2276334625545904 |
| 0.6798409111495843 | 0.0554437203774238 | 0.2197614396442978 |
| 0.9186704271599980 | 0.0468840232925115 | 0.1848908521383744 |
| 0.5689197402645987 | 0.8734288660740234 | 0.4156412442433342 |
| 0.5840984510637561 | 0.0047800679923587 | 0.4316143010826798 |
| 0.6087321656910811 | 0.1358276817621940 | 0.4305844444220809 |
| 0.7983743907337530 | 0.8692503296484315 | 0.3751829521828491 |
| 0.8147758774350069 | 0.0001537750167942 | 0.4171277244711054 |
| 0.7935531234311474 | 0.1331552831903352 | 0.4210961395705022 |
| 0.0132643698405085 | 0.9534927234252994 | 0.2192303139151095 |
| 0.0156207288254609 | 0.1346226443280246 | 0.2222352971963256 |
| 0.8580516582710789 | 0.0726478519573298 | 0.7733985336106107 |
| 0.8167591940729045 | 0.0672973073660289 | 0.5869884737284278 |
| 0.7019577164945545 | 0.0483487323716980 | 0.4887966352010097 |
| 0.5941429615406250 | 0.0730167619235548 | 0.6009966637925955 |

**Structure files (CONTCAR) involved in this work:**

|                    |                    |                    |
|--------------------|--------------------|--------------------|
| 0.6068114763979310 | 0.0570592411507070 | 0.7987850421813157 |
| 0.7298346370764991 | 0.0512311771391937 | 0.7319862442878464 |
| 0.8688912055528228 | 0.8282552424003380 | 0.7392012436683214 |
| 0.8104291133238967 | 0.8423418251461365 | 0.5689717605045800 |
| 0.6904239147671709 | 0.8541332935517933 | 0.4891864894983666 |
| 0.5851464537232307 | 0.8300778677958788 | 0.6030996114034379 |
| 0.5964286560902271 | 0.8454719357150580 | 0.7999211560529343 |
| 0.7239772337680972 | 0.8489571298838439 | 0.7474088475800094 |
| 0.8190619879340317 | 0.9554756579601174 | 0.6985995928169387 |
| 0.5827954444242768 | 0.9522742073737348 | 0.6795084690411569 |
| 0.9326604410969708 | 0.1252468926215708 | 0.9156821347053156 |
| 0.9034229174193785 | 0.9958201030883053 | 0.9244637458393410 |
| 0.8961402002539125 | 0.8622485188988324 | 0.9295016070354074 |
| 0.6990390849013346 | 0.1357574079588134 | 0.8769192504275047 |
| 0.7013391457729947 | 0.0053023816559049 | 0.9152024623186422 |
| 0.6875260108689344 | 0.8723188268894174 | 0.9374672628240349 |
| 0.4896519166363117 | 0.0454208182865233 | 0.7186319880554731 |
| 0.4815012296118064 | 0.8689310691679223 | 0.7103615557269635 |
| 0.3566927219217900 | 0.4341630079388612 | 0.7202626255448092 |
| 0.3153471650498357 | 0.4428259446220873 | 0.9073730165646922 |
| 0.2007794938396530 | 0.4435795735588124 | 0.0082200405252637 |
| 0.0906644261395848 | 0.4319808815893665 | 0.9011336315502901 |
| 0.1037614694801619 | 0.4362503879333052 | 0.7033067844164993 |
| 0.2282905746356252 | 0.4542218606832703 | 0.7606144609714670 |
| 0.3558564511973740 | 0.6743877989769529 | 0.7454406992310928 |
| 0.3073596563669022 | 0.6486656248267924 | 0.9231584837649989 |
| 0.1932710012215143 | 0.6452812126225925 | 0.0212064095270153 |
| 0.0960629019699355 | 0.6695209207765028 | 0.8937063503499755 |
| 0.1004548706506978 | 0.6624904204603839 | 0.6965269933870373 |
| 0.2260428327750091 | 0.6486521499727002 | 0.7659689210121018 |
| 0.3164718708483036 | 0.5513318101512926 | 0.7883025216741046 |
| 0.0903397058189353 | 0.5486681510990711 | 0.8050626243805727 |
| 0.4326232405090847 | 0.3741225833151658 | 0.5855925206411344 |
| 0.4139768861110181 | 0.5054546273289171 | 0.5725862607143813 |
| 0.3931617298826742 | 0.6375657697846303 | 0.5644811672167941 |
| 0.1987765480844588 | 0.3644913427817242 | 0.6202930363809928 |
| 0.1888122014775189 | 0.4955461640277404 | 0.5803996541551503 |
| 0.1979491376228185 | 0.6290068238624587 | 0.5713189891792841 |
| 0.9874383003617523 | 0.4607506970596278 | 0.7847490128042507 |
| 0.9880211282359208 | 0.6305518378763760 | 0.7941491070076498 |
| 0.1414570705747576 | 0.5693958576597649 | 0.2216694713486803 |
| 0.1837025510073280 | 0.5589349485954745 | 0.4078378480637950 |
| 0.2982773136952410 | 0.5517303922236098 | 0.5092226003553814 |
| 0.4074998049629164 | 0.5702558152995812 | 0.3993740946412070 |
| 0.3959215104071933 | 0.5562373274628992 | 0.2027456718432002 |
| 0.2701432666719864 | 0.5480512553710860 | 0.2605982608681263 |
| 0.1395438726194667 | 0.3287920905358351 | 0.2505559087150544 |
| 0.1939310071897427 | 0.3551791644568028 | 0.4243166176846601 |
| 0.3109072411183635 | 0.3532516889233493 | 0.5157865755723202 |
| 0.4154079248932561 | 0.3291213256318284 | 0.3999380671335753 |
| 0.3963109485784387 | 0.3428722043550196 | 0.2056192277988545 |
| 0.2703271785829111 | 0.3530870950843039 | 0.2628902632779032 |
| 0.1809913252750950 | 0.4511836216604727 | 0.2879434676794598 |

**Structure files (CONTCAR) involved in this work:**

|                    |                    |                    |
|--------------------|--------------------|--------------------|
| 0.4189476760901878 | 0.4504043002342480 | 0.3194199467988459 |
| 0.0687497441896635 | 0.6255292812089557 | 0.0782003691926649 |
| 0.0875004960170729 | 0.4944634343040612 | 0.0752192983883423 |
| 0.1026174401301813 | 0.3621883187240919 | 0.0660312846328284 |
| 0.3071915672407065 | 0.6349039510885934 | 0.1200482581812080 |
| 0.3065547379527143 | 0.5041478023292734 | 0.0802543531880761 |
| 0.3030911042869227 | 0.3698316344696516 | 0.0703215568874916 |
| 0.5128693980523510 | 0.5443056402289337 | 0.2827839172674900 |
| 0.5166079257039862 | 0.3634843834988727 | 0.2825836621771174 |
| 0.4377665702204832 | 0.7507974115990128 | 0.6400881188567953 |
| 0.1923386130817573 | 0.7507616049467545 | 0.6434794262559393 |
| 0.2745109170949313 | 0.7503200419438939 | 0.0419480001674304 |
| 0.1107633741122493 | 0.7493128931115021 | 0.0505332845048160 |
| 0.0596370607369805 | 0.2502060533505920 | 0.1470205876233759 |
| 0.3079197091395404 | 0.2498602293212096 | 0.1493570167450970 |
| 0.2272996039304001 | 0.2498310963981863 | 0.5363867897556569 |
| 0.3922150614832815 | 0.2499904497959200 | 0.5543178601201854 |
| 0.5614391124244338 | 0.2501837960575493 | 0.3636999986242811 |
| 0.8116375514045386 | 0.2533032955938344 | 0.3463981476949008 |
| 0.7288651647960485 | 0.2492420947466928 | 0.9613814000870323 |
| 0.8925387147807294 | 0.2497408163768725 | 0.9494783165907779 |
| 0.9423968187588275 | 0.7493062922388536 | 0.8583753883813480 |
| 0.6785196894132728 | 0.7509931774632809 | 0.8682591347724795 |
| 0.7653543344797809 | 0.7498179775400712 | 0.4366625383267977 |
| 0.6088595343500370 | 0.7502175663495972 | 0.4505281428597878 |
| 0.7988442646148007 | 0.6302597878363236 | 0.6880433548326839 |
| 0.7983277338465410 | 0.8719855031163311 | 0.6948967246955711 |
| 0.0209784241327557 | 0.8100920585392299 | 0.5215288756675009 |
| 0.9818327391673400 | 0.6898328921337102 | 0.4505852425695104 |
| 0.9597544012390506 | 0.7797187762652028 | 0.4161690297446280 |
| 0.0318252218236619 | 0.7206000160443096 | 0.5703868892187216 |
| 0.9146093351701716 | 0.8065562008673218 | 0.5710167539480574 |
| 0.9176249325383423 | 0.7007778325334688 | 0.5852274498071088 |

**Figure S1 La/ZSM-5**

1.00000000000000

20.0219993591000005 0.0000000000000000 0.0000000000000000

0.0000000000000000 19.8990001678000006 0.0000000000000000

0.0000000000000000 0.0000000000000000 13.3830003737999998

Si Al O La H

95 1 194 1 2

**Direct**

0.4219298022682870 0.0576416925868555 0.6495056956248796

0.3060773151120852 0.0303083967152425 0.7979258631110954

0.2801973415574439 0.0624300153129417 0.0181864321664942

0.1200149777357238 0.0680562569268514 0.0115569709127587

0.0659099768395656 0.0309809627638235 0.8002850961503186

0.1825758068372066 0.0604915842844504 0.6671347204426796

0.4196128572698731 0.8268209916815580 0.6687143110055033

0.3033322468594869 0.8708295737760274 0.8081212696648484

0.2667837735434307 0.8307139824812882 0.0255338678028357

0.1123886699208982 0.8283545627506382 0.0114670196330126

0.0635354329643885 0.8732115737545786 0.7993347776237519

0.1815612302060054 0.8291310718091113 0.6734831721680881

**Structure files (CONTCAR) involved in this work:**

|                    |                    |                    |
|--------------------|--------------------|--------------------|
| 0.0782463802832655 | 0.9433186549796347 | 0.1493354637224631 |
| 0.1939138120269085 | 0.9702349503817269 | 0.2971036467927064 |
| 0.2191034853713921 | 0.9397384147848497 | 0.5180558094461959 |
| 0.3792768896017373 | 0.9338578559310088 | 0.5108915794360133 |
| 0.4339154590418771 | 0.9698748795965370 | 0.2995919484915857 |
| 0.3172064860065565 | 0.9410304650477290 | 0.1663345491364299 |
| 0.0793380421628493 | 0.1740372651821453 | 0.1702505050318395 |
| 0.1958335193398284 | 0.1293749264830090 | 0.3085413713995850 |
| 0.2329624894144477 | 0.1696471201148804 | 0.5257739657907189 |
| 0.3874130787531270 | 0.1728542536783732 | 0.5127998700063329 |
| 0.4361688180642004 | 0.1283651271718778 | 0.2998416081719423 |
| 0.3174530016957762 | 0.1724272277522879 | 0.1745149894647776 |
| 0.5750567251081248 | 0.5580493816329288 | 0.3463345590951663 |
| 0.6916216560245217 | 0.5282184864506493 | 0.1990631733607358 |
| 0.7183234614805331 | 0.5599391914946330 | 0.9801819539103019 |
| 0.8775360479409267 | 0.5666598116263365 | 0.9817346415261757 |
| 0.9320100118202278 | 0.5346909464621838 | 0.1887536751554079 |
| 0.8173335293953246 | 0.5568311661540275 | 0.3277036536247606 |
| 0.5823207518136434 | 0.3277064392566055 | 0.3290115342992763 |
| 0.6961211461026121 | 0.3702463756328828 | 0.1873572106552277 |
| 0.7336946906864662 | 0.3280171014014514 | 0.9692219808463611 |
| 0.8878607827717981 | 0.3234948867425550 | 0.9831735454207126 |
| 0.8148979335012778 | 0.3322755491627307 | 0.3302454200072996 |
| 0.9212770127174666 | 0.4411635813716696 | 0.8490033290904470 |
| 0.8048996355341483 | 0.4716902452448820 | 0.7031730824411487 |
| 0.7778129272327874 | 0.4418707358176260 | 0.4807552890250414 |
| 0.6199843151242608 | 0.4374144962038210 | 0.4845072302851683 |
| 0.5661123811198732 | 0.4691788598959712 | 0.6968529759313673 |
| 0.6807945751833749 | 0.4396206432074576 | 0.8338878252285032 |
| 0.9182369637242299 | 0.6729758362421150 | 0.8211345380978903 |
| 0.8036880152470337 | 0.6301213885569871 | 0.6846593108302769 |
| 0.7633128218338491 | 0.6672086290520741 | 0.4676405870568183 |
| 0.6090988676964610 | 0.6729569460734114 | 0.4838872402635026 |
| 0.5628214699925044 | 0.6273891483106341 | 0.6976986712788672 |
| 0.6827672027272901 | 0.6715146358466328 | 0.8221003931644305 |
| 0.5776627517665891 | 0.9430166358423467 | 0.3491193732700569 |
| 0.6951473954955134 | 0.9708359140559764 | 0.2035356536618529 |
| 0.7193966299444270 | 0.9387770899383073 | 0.9818917404232594 |
| 0.8798728805105067 | 0.9318947263238725 | 0.9874339733501850 |
| 0.9337161493311665 | 0.9689928141507467 | 0.1988514850771071 |
| 0.8188080671918425 | 0.9395477426963700 | 0.3350971924922016 |
| 0.5806276624395438 | 0.1742103455287387 | 0.3282391926908121 |
| 0.6959826877827932 | 0.1303249229264952 | 0.1871185821385211 |
| 0.7329019322507548 | 0.1682994030974596 | 0.9697655003642632 |
| 0.8872880631685326 | 0.1713708075490061 | 0.9818036899700336 |
| 0.8174509670718105 | 0.1732122931467418 | 0.3205807531331570 |
| 0.9213956106470114 | 0.0547342896207623 | 0.8469311841038096 |
| 0.8051754637071818 | 0.0286571280542457 | 0.6968196798714550 |
| 0.7807509399728698 | 0.0617839265021106 | 0.4783349425465556 |
| 0.6207918387827284 | 0.0665420908264712 | 0.4857456499889917 |
| 0.5666590717266748 | 0.0307047420376068 | 0.6966799854243649 |
| 0.6827660796647729 | 0.0578244092504251 | 0.8312411343784546 |
| 0.9199868975445221 | 0.8265742523616135 | 0.8293868878843454 |

**Structure files (CONTCAR) involved in this work:**

|                    |                    |                    |
|--------------------|--------------------|--------------------|
| 0.8029047350991888 | 0.8694002598579278 | 0.6876345580413460 |
| 0.7660589034635088 | 0.8264961818015648 | 0.4709122408521540 |
| 0.6114900515265036 | 0.8267777505461554 | 0.4849750571200218 |
| 0.5635774105979890 | 0.8726073875801276 | 0.6975304240394111 |
| 0.6815234473527607 | 0.8295909485120420 | 0.8254882201704816 |
| 0.4217271758376542 | 0.4428139980309429 | 0.6478635392121280 |
| 0.3049653530048269 | 0.4711203489905610 | 0.7952652088635404 |
| 0.2794574443907306 | 0.4381661974270076 | 0.0157097886824316 |
| 0.1183577769197618 | 0.4337246704192948 | 0.0125046263584988 |
| 0.0650540667307615 | 0.4681776137220733 | 0.8001092196475833 |
| 0.1810013708494657 | 0.4399165659763887 | 0.6644908096722646 |
| 0.4192897883530448 | 0.6728881944215325 | 0.6697557410301014 |
| 0.3032451400854365 | 0.6302747379689175 | 0.8098156131518285 |
| 0.2659921218681894 | 0.6707844764590564 | 0.0259934741827142 |
| 0.1115803081800422 | 0.6742722143503159 | 0.0109359574773636 |
| 0.0626349479256339 | 0.6264255158206181 | 0.7992726425945104 |
| 0.1815548621157334 | 0.6712451320933039 | 0.6752521618787310 |
| 0.0775139976740052 | 0.5599073694236550 | 0.1484093289891798 |
| 0.1923208642750669 | 0.5306317191896891 | 0.2975943114056380 |
| 0.2183619457599872 | 0.5604697619277935 | 0.5183693368971851 |
| 0.3785290161770660 | 0.5659571871616585 | 0.5105190231025774 |
| 0.4314683254122720 | 0.5313106244597701 | 0.2985305272042842 |
| 0.3147598789576597 | 0.5591307186176619 | 0.1637637784639083 |
| 0.0783681802899611 | 0.3282845763232086 | 0.1758724522970008 |
| 0.1977191336006699 | 0.3722095892308535 | 0.3081590634351096 |
| 0.2332329805871773 | 0.3299134760080055 | 0.5254635670962120 |
| 0.3877191236577514 | 0.3268132534619793 | 0.5130102010110812 |
| 0.4375791513832438 | 0.3732530646229267 | 0.3016925561185803 |
| 0.3197793821198622 | 0.3307482485032099 | 0.1747071601871490 |
| 0.9358222280145879 | 0.1273413106687666 | 0.1956735051344518 |
| 0.9322676119932261 | 0.3734955443136813 | 0.1945299882467506 |
| 0.3577864830072860 | 0.0669593051943480 | 0.7223248392900309 |
| 0.3164992054309710 | 0.0597842374563988 | 0.9097553659110343 |
| 0.2000267475366483 | 0.0571414133481847 | 0.0050721504523277 |
| 0.0883170745274126 | 0.0712155279295762 | 0.9004034082146192 |
| 0.1054526274805818 | 0.0600590974948520 | 0.7037240451076926 |
| 0.2297089496581630 | 0.0453716826939241 | 0.7636010638457623 |
| 0.3588547915441616 | 0.8274862610954349 | 0.7486898499684569 |
| 0.3074322638120127 | 0.8512920905347674 | 0.9252605831658427 |
| 0.1894257117678051 | 0.8548033280415265 | 0.0139236489063054 |
| 0.0842770169968253 | 0.8311114369673799 | 0.8982739677934355 |
| 0.1040199874888849 | 0.8430013580426684 | 0.7038053622446939 |
| 0.2289828659657253 | 0.8535801205219659 | 0.7658469515178733 |
| 0.3200420098605570 | 0.9499461283119454 | 0.7933077003482043 |
| 0.0828695030786590 | 0.9516570002184234 | 0.8156603876637684 |
| 0.4324389928038005 | 0.1265464318906599 | 0.5861902987894801 |
| 0.4126131202566829 | 0.9957676947525058 | 0.5718037098223778 |
| 0.3967891367221609 | 0.8634129469430584 | 0.5658323710693944 |
| 0.1994564800490119 | 0.1342515436700493 | 0.6223911650120125 |
| 0.1932123495258737 | 0.0035503301544783 | 0.5821640340913219 |
| 0.1994985708070810 | 0.8695342565259766 | 0.5718463036345245 |
| 0.9869594043889809 | 0.0419243509662611 | 0.7781692898022127 |
| 0.9838059254635155 | 0.8651076484137159 | 0.7798931517906140 |

**Structure files (CONTCAR) involved in this work:**

|                    |                    |                    |
|--------------------|--------------------|--------------------|
| 0.1426923095073495 | 0.9330276984556943 | 0.2213930733108522 |
| 0.1831388091445410 | 0.9418331431985381 | 0.4093938661243794 |
| 0.2993364240955280 | 0.9449608582761018 | 0.5056212965924179 |
| 0.4100568555118312 | 0.9301700473489010 | 0.3993184939120771 |
| 0.3944755862040202 | 0.9417898341147288 | 0.2023013538526747 |
| 0.2704327388615748 | 0.9550106792882532 | 0.2635886845676819 |
| 0.1398447541173523 | 0.1730978639478560 | 0.2508752351558278 |
| 0.1922862896416281 | 0.1474236242493905 | 0.4263043082068760 |
| 0.3105069343037247 | 0.1460530146665730 | 0.5147911751081720 |
| 0.4154903261813900 | 0.1697319632720442 | 0.3995570196672120 |
| 0.3949231901052804 | 0.1584130970559263 | 0.2049643701614783 |
| 0.2700527621229629 | 0.1471912560327669 | 0.2662995336202281 |
| 0.1794989281028478 | 0.0504412493507910 | 0.2913100805700909 |
| 0.4184297207723658 | 0.0494591567387152 | 0.3150698012956025 |
| 0.0674622805211084 | 0.8750601107681161 | 0.0845280022213707 |
| 0.0873135577926121 | 0.0060969548854657 | 0.0732167809191442 |
| 0.1029495200689306 | 0.1386652762217557 | 0.0666067211184206 |
| 0.3007028716000195 | 0.8675697201702233 | 0.1205780539351576 |
| 0.3058430450808650 | 0.9987854939880673 | 0.0829307601972942 |
| 0.2997583839843672 | 0.1328376562491022 | 0.0719175581977569 |
| 0.5127476166477587 | 0.9564506112414692 | 0.2792994764409175 |
| 0.5155817641536670 | 0.1375722868353511 | 0.2794278433025829 |
| 0.6409905256025238 | 0.5647607205707890 | 0.2766109713789615 |
| 0.6834417077847311 | 0.5626303623242916 | 0.0898179022276022 |
| 0.7983432822175669 | 0.5509523583814100 | 0.9915997739081394 |
| 0.9109152604401954 | 0.5785523000137376 | 0.0905450593616656 |
| 0.8930258362301525 | 0.5637925182323271 | 0.2870006821198343 |
| 0.7683660273771582 | 0.5369874022874451 | 0.2356213727175865 |
| 0.6409586137754280 | 0.3255427019054306 | 0.2457665813352713 |
| 0.6952482390875980 | 0.3481917041446511 | 0.0715170155039702 |
| 0.8110233961570604 | 0.3515421351275412 | 0.9764086013799339 |
| 0.9137817776337536 | 0.3222563845644650 | 0.0961472512953955 |
| 0.8924216173225008 | 0.3539845323176526 | 0.3108175849663675 |
| 0.7699671452728877 | 0.3576909111775112 | 0.2354363921928183 |
| 0.6740663291108320 | 0.4485647852420100 | 0.1966959413001423 |
| 0.9162376756541230 | 0.4569144983442398 | 0.1711452365372604 |
| 0.5647397217037181 | 0.6273409044289373 | 0.4086331770707198 |
| 0.5800875269304722 | 0.4959926178758339 | 0.4251315609279340 |
| 0.6092541144533756 | 0.3658137012985659 | 0.4288067923752171 |
| 0.7944613576462534 | 0.6287714028863196 | 0.3722255978543650 |
| 0.8156384149900845 | 0.4980931334730820 | 0.4129563975778919 |
| 0.7894674183544542 | 0.3676104762724707 | 0.4334914411426953 |
| 0.0112048249603969 | 0.5460020490278956 | 0.2141354864956343 |
| 0.0170298825467597 | 0.3640408251845278 | 0.2365033598994791 |
| 0.8568123570751193 | 0.4331635190505902 | 0.7759820678911277 |
| 0.8129533054830688 | 0.4430876972421098 | 0.5901060747025619 |
| 0.6986304523402170 | 0.4582537260567992 | 0.4873469693606788 |
| 0.5908551919916805 | 0.4300625889831217 | 0.5967716231589305 |
| 0.6042737923053974 | 0.4398269252600313 | 0.7942432119851770 |
| 0.7287491753038275 | 0.4580652044999797 | 0.7394319709059769 |
| 0.8613435731524224 | 0.6760835081218239 | 0.7348279050472357 |
| 0.8050518654390226 | 0.6443521681457954 | 0.5657767745380156 |
| 0.6856699882112764 | 0.6455075844168746 | 0.4829144170042918 |

**Structure files (CONTCAR) involved in this work:**

|                    |                    |                    |
|--------------------|--------------------|--------------------|
| 0.5802915046851258 | 0.6688094859582591 | 0.5966931322937286 |
| 0.6052656485107298 | 0.6580903261476319 | 0.7908224337097427 |
| 0.7303197871322624 | 0.6492276153624289 | 0.7287733823865287 |
| 0.8207081969121075 | 0.5517789173966061 | 0.7073654887411208 |
| 0.5819075160262344 | 0.5488053459410799 | 0.6824399204213430 |
| 0.9325850607373104 | 0.3720102876976193 | 0.9108771043164449 |
| 0.9134364176952169 | 0.5040574852747099 | 0.9254986846167687 |
| 0.8882655656052663 | 0.6354540624264043 | 0.9187264368213750 |
| 0.6977182699248303 | 0.3652731887618537 | 0.8757718082026065 |
| 0.6887212870200295 | 0.4952617021154871 | 0.9214859803423612 |
| 0.7012902404905583 | 0.6292721235755613 | 0.9218270742408726 |
| 0.4870285671961593 | 0.4566759294523865 | 0.7163043349342151 |
| 0.4833496554064594 | 0.6353456408761357 | 0.7203914855369647 |
| 0.6428606363082751 | 0.9343764658699245 | 0.2784445156374342 |
| 0.6853758579166145 | 0.9410760882048693 | 0.0918637773114427 |
| 0.7999057497031751 | 0.9433096863466586 | 0.9905132855300716 |
| 0.9096017960600888 | 0.9289706014639100 | 0.0996029817267045 |
| 0.8955668023414693 | 0.9398109947677774 | 0.2966121016868851 |
| 0.7710401868122081 | 0.9553912750632123 | 0.2395290282460328 |
| 0.6398535202291368 | 0.1735695759750783 | 0.2457666891491793 |
| 0.6911150382186736 | 0.1465153895132816 | 0.0688079248635277 |
| 0.8101997982429067 | 0.1445832895085199 | 0.9833426673277562 |
| 0.9171613933236071 | 0.1673951262065851 | 0.0941575613667250 |
| 0.8947872324825763 | 0.1593536468245329 | 0.2893707684774339 |
| 0.7700673063581160 | 0.1507006501450853 | 0.2272103812606369 |
| 0.6814939537315524 | 0.0512141974605549 | 0.2072956182523353 |
| 0.9169552135399658 | 0.0483405545974459 | 0.1838085104203350 |
| 0.5668761663705842 | 0.8741663414502431 | 0.4124325990524017 |
| 0.5849183715654817 | 0.0050285433881233 | 0.4271104357743865 |
| 0.6043265868053552 | 0.1369369085331234 | 0.4300593307017143 |
| 0.8019733541209990 | 0.8657636371985322 | 0.3797415406978761 |
| 0.8098485258885757 | 0.9964915178637733 | 0.4205757166630671 |
| 0.7989200461129404 | 0.1308089682618991 | 0.4203053413533344 |
| 0.0128787102423883 | 0.9566609542706854 | 0.2179769124506584 |
| 0.0153166256964289 | 0.1351452591430506 | 0.2180918509584902 |
| 0.8563796391332787 | 0.0624289508828759 | 0.7757273191798366 |
| 0.8142021363176176 | 0.0646044826080801 | 0.5888666856472579 |
| 0.7004899053716710 | 0.0534403364788066 | 0.4877651787779665 |
| 0.5914795333762025 | 0.0714388645183288 | 0.5982676829231574 |
| 0.6054505500209341 | 0.0574200045583655 | 0.7952752088389644 |
| 0.7289033434252135 | 0.0394959112437058 | 0.7349530197802785 |
| 0.8584043471948577 | 0.8290800263856380 | 0.7512971996598391 |
| 0.8054891549341140 | 0.8418498108432885 | 0.5740876121961239 |
| 0.6889940193030003 | 0.8517558413641420 | 0.4816833934154147 |
| 0.5842346802324726 | 0.8300861572915381 | 0.5987854704914305 |
| 0.6042111171082252 | 0.8433032954706485 | 0.7934678487867162 |
| 0.7290128015273369 | 0.8564166237754461 | 0.7347426933692384 |
| 0.8207990225170833 | 0.9488067761590728 | 0.6893856851297694 |
| 0.5816225202349612 | 0.9511676029279525 | 0.6794217192930793 |
| 0.9315693311816018 | 0.1239075775810118 | 0.9088723512524457 |
| 0.9140034322349680 | 0.9929140085742406 | 0.9253907416278939 |
| 0.8980573816669096 | 0.8608801036689623 | 0.9344405449544073 |
| 0.7006566007733314 | 0.1320422128919231 | 0.8727344212743635 |



**Structure files (CONTCAR) involved in this work:**

|                    |                    |                    |
|--------------------|--------------------|--------------------|
| 0.6927728198777072 | 0.0028345972605173 | 0.9190631291977075 |
| 0.6981422259829433 | 0.8688223921477147 | 0.9286565268418882 |
| 0.4877943374865931 | 0.0439850989400330 | 0.7168752725433117 |
| 0.4839740989754043 | 0.8642268373702110 | 0.7182142503099008 |
| 0.3566568446630746 | 0.4350290005212739 | 0.7191423053028945 |
| 0.3139305941157919 | 0.4395227270423798 | 0.9060026567385614 |
| 0.1989778340724194 | 0.4382128990117953 | 0.0070036419845009 |
| 0.0882905874833457 | 0.4288512950783608 | 0.9005442216520079 |
| 0.1044077463552555 | 0.4386315287006859 | 0.7034096760578609 |
| 0.2286736526995709 | 0.4577982977027959 | 0.7591146725158686 |
| 0.3584457634467599 | 0.6735452409755526 | 0.7496202010093931 |
| 0.3079330012741716 | 0.6493346505352300 | 0.9271398059159738 |
| 0.1886108954284011 | 0.6476556866017159 | 0.0111956294696052 |
| 0.0817176813850479 | 0.6687944214242779 | 0.8988132156855461 |
| 0.1039644196954626 | 0.6572699516748481 | 0.7049985181050646 |
| 0.2286779801125533 | 0.6475829547893046 | 0.7683655740831822 |
| 0.3199406047971632 | 0.5512467144741635 | 0.7941436992538723 |
| 0.0815140479855618 | 0.5477235681802269 | 0.8143701522216552 |
| 0.4322967350175848 | 0.3728507531030413 | 0.5873467167144202 |
| 0.4140317181925592 | 0.5035490181999978 | 0.5676344330027318 |
| 0.3962414256110875 | 0.6356783340955726 | 0.5673617963056448 |
| 0.1990286247798593 | 0.3660325013260361 | 0.6209487665958592 |
| 0.1891428586754450 | 0.4956695058019358 | 0.5770926701301247 |
| 0.1997197906199792 | 0.6299149889084962 | 0.5745879086064483 |
| 0.9863885532784074 | 0.4546557030773258 | 0.7789868171339767 |
| 0.9832132421127961 | 0.6335943046508216 | 0.7770905080987723 |
| 0.1410098681180951 | 0.5681873218652082 | 0.2229669736350998 |
| 0.1843367391484262 | 0.5622520581704643 | 0.4083868446349807 |
| 0.2986595800126318 | 0.5531631157714704 | 0.5095444388360912 |
| 0.4064716551901614 | 0.5717950707402233 | 0.3972619069214194 |
| 0.3919604527555466 | 0.5570385047885316 | 0.1998361055312120 |
| 0.2687362375215865 | 0.5412991035635100 | 0.2604546833123343 |
| 0.1438871448269773 | 0.3270940296565759 | 0.2482219554219363 |
| 0.1925811584829533 | 0.3518546590933427 | 0.4252963762427094 |
| 0.3106516353466594 | 0.3535581179352223 | 0.5139525099533340 |
| 0.4167481408733388 | 0.3308294828367397 | 0.4003630355767505 |
| 0.3974000397302688 | 0.3426353067713607 | 0.2061287937408506 |
| 0.2725765673823322 | 0.3591318179417001 | 0.2654974941540277 |
| 0.1752952372953197 | 0.4504596197476592 | 0.2971869831609567 |
| 0.4178873754878589 | 0.4516536428381836 | 0.3171918805660535 |
| 0.0673805822192413 | 0.6293861434422684 | 0.0869930741842287 |
| 0.0894866115215030 | 0.4996981645371167 | 0.0686830183054266 |
| 0.0956436872455535 | 0.3667520382212540 | 0.0721695459394571 |
| 0.2975745607017929 | 0.6338729029310812 | 0.1230487539776246 |
| 0.3028149922360002 | 0.5048916965173945 | 0.0754658633881741 |
| 0.3038875294396101 | 0.3703607185553349 | 0.0718060907615069 |
| 0.5099036497642729 | 0.5459744858798293 | 0.2765632536103776 |
| 0.5173592565879742 | 0.3660359932790175 | 0.2826324836620832 |
| 0.4384092628572812 | 0.7497319516455172 | 0.6418638704298157 |
| 0.1933342757112684 | 0.7500530028503634 | 0.6513107683779004 |
| 0.2711035913162835 | 0.7507590741257339 | 0.0444110399208105 |
| 0.1081619425210842 | 0.7513126447204218 | 0.0497443341922846 |
| 0.0599696349328617 | 0.2513859824424391 | 0.1468509307940190 |

**Structure files (CONTCAR) involved in this work:**

0.3053579099840306 0.2518393918742830 0.1551581238239651  
0.2282177096910947 0.2499029229192229 0.5418114509011811  
0.3912371552574043 0.2498343781481712 0.5520178307035362  
0.5626558100797663 0.2511423857060514 0.3581119555107645  
0.8065378011472044 0.2520045848074332 0.3454460743023644  
0.7276410281300304 0.2480844971172614 0.9511174876434623  
0.8908098474928097 0.2472278938756883 0.9383328102933119  
0.9390029770194821 0.7489093797312758 0.8520271666287647  
0.6939999584922685 0.7504241859190242 0.8463335012245643  
0.7690577283582595 0.7469883957027020 0.4470365484854548  
0.6054271285517848 0.7500589476220717 0.4453622637330162  
1.0122274513814009 0.5030394984296646 0.4639139791901734  
0.9934846576269970 0.3394367557617690 0.5477464917625372  
0.9897522072712324 0.4033833550512052 0.4231651900691902  
1.0171859386771320 0.5514686529712417 0.4685174483198648  
0.9991892054233106 0.3315290206534960 0.6188192914265594

**Figure S1 Cu/ZSM-5**

1.0000000000000000

20.0219993591000005 0.0000000000000000 0.0000000000000000

0.0000000000000000 19.8990001678000006 0.0000000000000000

0.0000000000000000 0.0000000000000000 13.3830003737999998

Si O Al Cu

94 195 2 3

Direct

0.4221100861772452 0.0570840773755619 0.6481110242077338  
0.3071196902934430 0.0290892073232167 0.7970399045202718  
0.2797782741081543 0.0594425004544600 0.0169994110815814  
0.1202062683276934 0.0647430526995510 0.0110500400707017  
0.0662120236247910 0.0285849150514717 0.8000191527669503  
0.1831074944641996 0.0588521895417179 0.6658229048472236  
0.4204955820390457 0.8268446087379149 0.6700313857617911  
0.3054995566355753 0.8703490186226346 0.8101158233286931  
0.2696889122158583 0.8292959424617674 0.0293952234739594  
0.1157449763190070 0.8260221490555161 0.0179135522365579  
0.0670978208747512 0.8690086486733370 0.8041462896274300  
0.1840957426358592 0.8286529738143329 0.6745416556124446  
0.0778571734066742 0.9416291585203581 0.1501561198757763  
0.1947208709399444 0.9695883411918980 0.2966354797622718  
0.2192922510525850 0.9392858891748948 0.5172276478774203  
0.3790006950670999 0.9322246033348200 0.5126163582298723  
0.4342062042546652 0.9688388832865089 0.3031443590992094  
0.3192216790435592 0.9399573853157529 0.1657517889355890  
0.0816001210207864 0.1721447833753054 0.1693152249925861  
0.1965780868205045 0.1289469365615373 0.3106506860772247  
0.2325092087543045 0.1699819491491929 0.5270946620613405  
0.3871051390512564 0.1727663321154830 0.5105280487743349  
0.4358535291462532 0.1264807364050252 0.2999720116584678  
0.3171368938521961 0.1696640056446929 0.1748322518193435  
0.5787004879619884 0.5584224033805409 0.3483447846405541  
0.6941170517239859 0.5281391968116873 0.2046721587424993  
0.7178422371419622 0.5506399710687609 0.9791114068960790  
0.8753825820891211 0.5633522465232040 0.9881828228729085  
0.9318477116937244 0.5292643473105098 0.1992070389836946

**Structure files (CONTCAR) involved in this work:**

|                    |                    |                    |
|--------------------|--------------------|--------------------|
| 0.8169949987032638 | 0.5591058811241542 | 0.3347495452418425 |
| 0.5805611004206876 | 0.3263668837504222 | 0.3261530104392825 |
| 0.6965447309188217 | 0.3704717410213723 | 0.1920913597975089 |
| 0.7341002062775163 | 0.3287846983483984 | 0.9761934013740509 |
| 0.8883904497507162 | 0.3291017528869311 | 0.9907874198742352 |
| 0.9365285920218550 | 0.3713373120104553 | 0.2022308880193871 |
| 0.8179157051196208 | 0.3301860503155872 | 0.3293085410993291 |
| 0.9243537258018552 | 0.4441129298397504 | 0.8520585930978231 |
| 0.8077909623042241 | 0.4698984389111326 | 0.7065502936901706 |
| 0.7800763674305079 | 0.4402754343620630 | 0.4868222041157379 |
| 0.6207488204314472 | 0.4329873142965345 | 0.4861970542866649 |
| 0.5644038545558206 | 0.4641763354556450 | 0.6968887863998044 |
| 0.6810265456359601 | 0.4338427954152637 | 0.8301375058703340 |
| 0.8012557748041625 | 0.6277221247685296 | 0.6894393933397069 |
| 0.7659175926621336 | 0.6677638331475625 | 0.4705856493042990 |
| 0.6114195039685433 | 0.6722515885719882 | 0.4854945836195745 |
| 0.5639727446949822 | 0.6224308966667579 | 0.6985147088201051 |
| 0.6797505851196993 | 0.6675587154174881 | 0.8239507049496774 |
| 0.5791011772608934 | 0.9413007294651620 | 0.3490325241332184 |
| 0.6934849457970851 | 0.9722849580939023 | 0.2024818973329741 |
| 0.7187645691318977 | 0.9503719160278834 | 0.9802245134261627 |
| 0.8775524924022472 | 0.9486609983024047 | 0.9854917355901579 |
| 0.9338746165457412 | 0.9691221193571993 | 0.1977018240786044 |
| 0.8158691436671527 | 0.9345474589973543 | 0.3255900464775281 |
| 0.5803866875200421 | 0.1733300482285065 | 0.3216226475933859 |
| 0.6974738616038276 | 0.1296368235064725 | 0.1885578540176746 |
| 0.7369837889938072 | 0.1671905070857098 | 0.9721614341930900 |
| 0.8922627410997048 | 0.1751762362855609 | 0.9776178700158175 |
| 0.9383758806432226 | 0.1275933153919636 | 0.1940252189552923 |
| 0.8195797502617761 | 0.1740243099343580 | 0.3203201203704421 |
| 0.9230412143515416 | 0.0645285162129342 | 0.8405349555040633 |
| 0.8085781391235611 | 0.0293989173404401 | 0.6931683551266727 |
| 0.7827230916175459 | 0.0583168647346837 | 0.4727053874269495 |
| 0.6230676929426940 | 0.0676904951030298 | 0.4813436484522751 |
| 0.5668422087529190 | 0.0345700277586744 | 0.6916282583847596 |
| 0.6846650669792612 | 0.0640041613999435 | 0.8204043872266860 |
| 0.9158480823591263 | 0.8315504312804023 | 0.8333559723087082 |
| 0.8060635535759082 | 0.8702244502501145 | 0.6864331506617029 |
| 0.7679327666264788 | 0.8287325881399890 | 0.4725672196887128 |
| 0.6127659776591796 | 0.8273451988012787 | 0.4905172073577005 |
| 0.5641507451089353 | 0.8763639947235823 | 0.7020968522862392 |
| 0.4208992742485003 | 0.4413936483488977 | 0.6516603992979079 |
| 0.3060575958731135 | 0.4705481895265557 | 0.7986199951502322 |
| 0.2814271510392963 | 0.4392521103026267 | 0.0201721338261110 |
| 0.1211514669940639 | 0.4333958260271318 | 0.0133280361095560 |
| 0.0678578922205816 | 0.4694407224360410 | 0.8011626914699154 |
| 0.1833323369463549 | 0.4407988759832583 | 0.6670766190777486 |
| 0.4203776349827995 | 0.6727986378827066 | 0.6707251003481143 |
| 0.3068662665465238 | 0.6291171771328743 | 0.8118851815563755 |
| 0.2689230469141451 | 0.6689615828407178 | 0.0289803759473055 |
| 0.1148901706510528 | 0.6722194040897698 | 0.0127771803722057 |
| 0.0668275175958571 | 0.6286325087402388 | 0.7984011596629720 |
| 0.1870498455891444 | 0.6709119657707536 | 0.6739967183534863 |

**Structure files (CONTCAR) involved in this work:**

|                    |                    |                    |
|--------------------|--------------------|--------------------|
| 0.0771923942540240 | 0.5576817796450547 | 0.1489971706764391 |
| 0.1930391606643004 | 0.5297180423834741 | 0.2978102566694720 |
| 0.2211105324971474 | 0.5599865787043742 | 0.5173271365560030 |
| 0.3797772775567920 | 0.5655653297973386 | 0.5136594881076630 |
| 0.4347807202515154 | 0.5303705545438359 | 0.3034391853282067 |
| 0.3182376758091814 | 0.5595770315336588 | 0.1687252134955411 |
| 0.0805654736820590 | 0.3258965648628590 | 0.1705955698460417 |
| 0.1962689568566742 | 0.3704393993028933 | 0.3097434010486141 |
| 0.2334567743821562 | 0.3300129366468569 | 0.5265210192461088 |
| 0.3881870186359250 | 0.3262339013967096 | 0.5127598106059256 |
| 0.4370083225747305 | 0.3725797767434054 | 0.3012468242219263 |
| 0.3182861035600323 | 0.3281984773162224 | 0.1753880109863749 |
| 0.3578301074893249 | 0.0665267132401143 | 0.7207919526564021 |
| 0.3157401792922975 | 0.0605211723357132 | 0.9082058679080611 |
| 0.1997474071926422 | 0.0514919975140847 | 0.0036987016515007 |
| 0.0880914330871963 | 0.0689694263302917 | 0.9002340861786902 |
| 0.1063345560596746 | 0.0573824676881523 | 0.7040296179636062 |
| 0.2305224892846122 | 0.0408159762485330 | 0.7607928767175559 |
| 0.3607918799640579 | 0.8257487843326852 | 0.7523353053296111 |
| 0.3073817253000218 | 0.8513349724341388 | 0.9274941635282509 |
| 0.1920547074359265 | 0.8535473759022357 | 0.0260023720978490 |
| 0.0926766140663195 | 0.8294650800371409 | 0.9023702155478397 |
| 0.1064464796628938 | 0.8405126266362308 | 0.7067093566577124 |
| 0.2311731455863910 | 0.8548528321606877 | 0.7661359820551111 |
| 0.3237439431378530 | 0.9492304211946059 | 0.7956639998523980 |
| 0.0808093734332668 | 0.9489596648265285 | 0.8167931563933524 |
| 0.4316692361021845 | 0.1248244361280731 | 0.5818356422922105 |
| 0.4141674238494827 | 0.9932502774120235 | 0.5734612405163620 |
| 0.3934030752547484 | 0.8609999915211166 | 0.5672468429916340 |
| 0.2003478237780836 | 0.1333708360536361 | 0.6240007576447779 |
| 0.1916939655106742 | 0.0040822994316873 | 0.5774511352983414 |
| 0.1997613639385441 | 0.8698065129720810 | 0.5728228895400750 |
| 0.9875730334250019 | 0.0410758598269374 | 0.7765460063837938 |
| 0.9880780364467919 | 0.8540327029052740 | 0.7906590414870428 |
| 0.1426524218098141 | 0.9331990395437461 | 0.2215090532217771 |
| 0.1847041686273258 | 0.9388944114947532 | 0.4076186990838338 |
| 0.2994705598487035 | 0.9462600812025580 | 0.5072940939913334 |
| 0.4093384871752916 | 0.9273735202611382 | 0.4007026205377692 |
| 0.3958869779897916 | 0.9436438574544288 | 0.2033609191500310 |
| 0.2708294103478963 | 0.9551992826452578 | 0.2607578955962433 |
| 0.1417991558643507 | 0.1725748990571182 | 0.2500774062061494 |
| 0.1911728422678083 | 0.1479637544682467 | 0.4279340147352386 |
| 0.3099257114540331 | 0.1469137635806592 | 0.5131054350821874 |
| 0.4149753085340804 | 0.1708504095527440 | 0.3968339339060419 |
| 0.3945531232490264 | 0.1531625392005730 | 0.2028977325226953 |
| 0.2710713721456917 | 0.1467805813257234 | 0.2695726343793610 |
| 0.1803536276122754 | 0.0499057546571548 | 0.2940491088680501 |
| 0.4190110804517865 | 0.0481696526187204 | 0.3223415885827690 |
| 0.0677403602697897 | 0.8722179930732308 | 0.0875365971634025 |
| 0.0856586019441120 | 0.0035498706302576 | 0.0721226924432047 |
| 0.1052962836269730 | 0.1355376491984671 | 0.0668014152224617 |
| 0.3061302871644584 | 0.8647182037480577 | 0.1236232104137478 |
| 0.3073632551684820 | 0.9950824603211624 | 0.0784199142390503 |

**Structure files (CONTCAR) involved in this work:**

|                    |                    |                    |
|--------------------|--------------------|--------------------|
| 0.2963324923459951 | 0.1292827158294888 | 0.0742940365421950 |
| 0.5128094832718353 | 0.9550560578903179 | 0.2826991058090633 |
| 0.5151015969416083 | 0.1349703189870519 | 0.2771326148245596 |
| 0.6423179735045115 | 0.5694606764598966 | 0.2742144572982816 |
| 0.6859889597484766 | 0.5544313317931304 | 0.0899878744112720 |
| 0.7977507348045216 | 0.5394230103052230 | 0.9795760772549870 |
| 0.9022138830883686 | 0.5679835473127587 | 0.1016138861875438 |
| 0.8943151205905138 | 0.5547069995291392 | 0.2995395592419017 |
| 0.7706791056031599 | 0.5412766247491039 | 0.2381325234537647 |
| 0.6405249118946679 | 0.3242666491331589 | 0.2448325386269118 |
| 0.6939853377423008 | 0.3561015790155100 | 0.0732713745540786 |
| 0.8110688765113732 | 0.3541847114616594 | 0.9858176462514525 |
| 0.9141454346521997 | 0.3276268622980811 | 0.1054749659423269 |
| 0.8954174461425408 | 0.3448118757926224 | 0.2992916966680191 |
| 0.7705685467771402 | 0.3535835592636796 | 0.2358860627808152 |
| 0.6773372298445705 | 0.4486123824903866 | 0.2131233538722736 |
| 0.9190269340932019 | 0.4496324046886254 | 0.1810806069878301 |
| 0.5652413178566835 | 0.6267839519001104 | 0.4117630373765421 |
| 0.5913489900759593 | 0.4965576790658671 | 0.4247910130121062 |
| 0.6064732646169176 | 0.3634760475055200 | 0.4268649217242655 |
| 0.8013284037032180 | 0.6346027278849700 | 0.3732661170893058 |
| 0.8033598825578020 | 0.5053052244206503 | 0.4231416898303604 |
| 0.7994007726544751 | 0.3712110232615072 | 0.4298850861654639 |
| 0.0102972979069288 | 0.5458550064213668 | 0.2150588167978353 |
| 0.0161114914444074 | 0.3626096447965478 | 0.2214092660681282 |
| 0.8590227960274029 | 0.4324960376345544 | 0.7823792847364534 |
| 0.8181334754693506 | 0.4414144956555004 | 0.5940257453892537 |
| 0.7000394004063931 | 0.4435034339523188 | 0.5035300027103943 |
| 0.5831790049741424 | 0.4271087042506694 | 0.5927635259151756 |
| 0.6055865393432051 | 0.4298199662564657 | 0.7879013872539822 |
| 0.7312947473802702 | 0.4538986257939266 | 0.7400443918539211 |
| 0.8521117600926170 | 0.6779004999184903 | 0.7419123056720198 |
| 0.8015216426277617 | 0.6380193655541756 | 0.5696149270428477 |
| 0.6877575819251948 | 0.6457705851605496 | 0.4738994770470691 |
| 0.5876016283974033 | 0.6639447895206075 | 0.6006477539209473 |
| 0.6021993798058273 | 0.6520357515175556 | 0.7972372190771461 |
| 0.7251623111505674 | 0.6399807973051771 | 0.7328577975712426 |
| 0.8217535031741975 | 0.5499638430365918 | 0.7138278316238547 |
| 0.5829144391412273 | 0.5435157096538172 | 0.6869913157174791 |
| 0.9341660201135963 | 0.3789532949923943 | 0.9238403634439365 |
| 0.9185796665928709 | 0.5103887773064917 | 0.9232239616359950 |
| 0.8894429660406118 | 0.6373846269708852 | 0.9371201255583590 |
| 0.7006520403854213 | 0.3615259797539991 | 0.8771762329989313 |
| 0.6823105607281892 | 0.4924355719583163 | 0.9155885944761616 |
| 0.6989979749452110 | 0.6256606059501758 | 0.9308853317747515 |
| 0.4858487038397895 | 0.4535512492710754 | 0.7220934289856626 |
| 0.4842391702349665 | 0.6313450492468996 | 0.7142606902093915 |
| 0.6417045408907214 | 0.9317209160310757 | 0.2729319448761197 |
| 0.6787587940830365 | 0.9565511169439801 | 0.0853715618613541 |
| 0.7980682570327542 | 0.9628096087539053 | 0.0006943084908744 |
| 0.9125285238234131 | 0.9345665319903594 | 0.0922150927117947 |
| 0.8931851585355076 | 0.9355970030145403 | 0.2896604907659877 |
| 0.7693025016340247 | 0.9480017629154228 | 0.2272323294354253 |

**Structure files (CONTCAR) involved in this work:**

|                    |                    |                    |
|--------------------|--------------------|--------------------|
| 0.6375404627090997 | 0.1744804655192075 | 0.2351079120478435 |
| 0.6972068186152637 | 0.1358891184787389 | 0.0676164029325551 |
| 0.8156337247524236 | 0.1472519824979908 | 0.9798625830138835 |
| 0.9247582894199555 | 0.1629902589115852 | 0.0867835570379994 |
| 0.8960886627994519 | 0.1652990510199628 | 0.2814339510196654 |
| 0.7699162083669372 | 0.1553461533131457 | 0.2279100731998028 |
| 0.6853247680429574 | 0.0523597406169405 | 0.2237324297098182 |
| 0.9168596924259937 | 0.0489855206819839 | 0.1910729187658579 |
| 0.5687862502519455 | 0.8738202502441991 | 0.4152627257719252 |
| 0.5905037149535037 | 0.0045261065269704 | 0.4230876005472317 |
| 0.6081923882270783 | 0.1369032602295396 | 0.4215119174105151 |
| 0.7990630617314846 | 0.8613317327814007 | 0.3715726530450796 |
| 0.8032668845483453 | 0.9930555556994488 | 0.4074619200584364 |
| 0.8052004343763544 | 0.1267942311383491 | 0.4163088966050675 |
| 0.0124682346897502 | 0.9553170913969450 | 0.2188499765246580 |
| 0.0176171503195399 | 0.1339331654308358 | 0.2188156356912637 |
| 0.8589644250631068 | 0.0691453988605451 | 0.7674192642424104 |
| 0.8209333941485309 | 0.0551540374013943 | 0.5795992339854988 |
| 0.7029261907940280 | 0.0573346664958294 | 0.4912484618727040 |
| 0.5886658534805181 | 0.0738816804416537 | 0.5902197818815421 |
| 0.6077436369474075 | 0.0675323719584394 | 0.7844854089435571 |
| 0.7321814007299408 | 0.0478732391912634 | 0.7249941480572232 |
| 0.8660834879624980 | 0.8273256264758210 | 0.7389649612598919 |
| 0.8107307066743832 | 0.8555425699964695 | 0.5670593354772633 |
| 0.6903162655038102 | 0.8517263075671473 | 0.4841679659074550 |
| 0.5860655252245773 | 0.8324278524803372 | 0.6040423004394634 |
| 0.6011098437122281 | 0.8502782410316991 | 0.8009467882569029 |
| 0.7349431796842615 | 0.8502100380211538 | 0.7313990722547042 |
| 0.8228505072900980 | 0.9497923568151685 | 0.7050835465457808 |
| 0.5822198155812424 | 0.9550701244719498 | 0.6788258570561868 |
| 0.9351558850464842 | 0.1376974084321423 | 0.8910064320553061 |
| 0.9118781059130409 | 0.0130964156842846 | 0.9335440905933989 |
| 0.8873220249753518 | 0.8836038191200902 | 0.9150910437193538 |
| 0.7052905897768363 | 0.1350155880118817 | 0.8714936784279970 |
| 0.6902314014835507 | 0.0029090005072450 | 0.9006279098492430 |
| 0.7100640232360148 | 0.8724880649467707 | 0.9408771942093551 |
| 0.4883131730051933 | 0.0469911506677097 | 0.7159989185314256 |
| 0.4831882967612079 | 0.8687197434346086 | 0.7145740912826628 |
| 0.3557230190712357 | 0.4318683893215335 | 0.7221775775491954 |
| 0.3157113264857394 | 0.4407045137332456 | 0.9103027051422660 |
| 0.2010489057878327 | 0.4453312589364247 | 0.0113336211368320 |
| 0.0923439756315065 | 0.4296816597358533 | 0.9007231862054884 |
| 0.1062182991618523 | 0.4403069509739893 | 0.7035169584384023 |
| 0.2292796931480402 | 0.4582230100357677 | 0.7640900423604094 |
| 0.3632009938403946 | 0.6736592609765504 | 0.7563480176492006 |
| 0.3094876321166890 | 0.6459233850988966 | 0.9299445912219398 |
| 0.1914716805393819 | 0.6448860037050174 | 0.0194692982711776 |
| 0.0900816788374519 | 0.6699139106150429 | 0.8980286384402799 |
| 0.1100364523871920 | 0.6554761042313613 | 0.7030628841654798 |
| 0.2334130541612924 | 0.6473307547646497 | 0.7679384617636420 |
| 0.3235480866330537 | 0.5501827601227236 | 0.7938002892463348 |
| 0.0824293746107739 | 0.5490251432895302 | 0.8163381284371616 |
| 0.4316722097274064 | 0.3729932517740521 | 0.5875309794281404 |

**Structure files (CONTCAR) involved in this work:**

0.4142684886354227 0.5048173680367659 0.5759816399756281  
0.3920446231656876 0.6367565798627194 0.5700839244927890  
0.2021656129626293 0.3672450886191296 0.6233658232774143  
0.1926057252662877 0.4973932439845600 0.5814664928623940  
0.2071366590227831 0.6309688125822502 0.5726316380704433  
0.9891486857676414 0.4541724677120416 0.7814818107828395  
0.9894703450095170 0.6424134870193761 0.7769978698000797  
0.1406486289804459 0.5666133803801070 0.2233380837387322  
0.1836109837831164 0.5595574787493489 0.4096471108638183  
0.3008060410778252 0.5500205200685220 0.5023339697853338  
0.4134933046533724 0.5706628514296560 0.4039556641293195  
0.3948756118354626 0.5590511356263661 0.2072793642732185  
0.2694036986037080 0.5439182559703114 0.2628714428580751  
0.1411361872046250 0.3262295958733666 0.2508036749961603  
0.1921795539359116 0.3520946424061144 0.4273978190600827  
0.3110793811926236 0.3522747174789118 0.5119615000484103  
0.4185387409022701 0.3301349014208088 0.4008133037961717  
0.3955926088811255 0.3423896796096323 0.2067860652712642  
0.2705588904473306 0.3528756398409799 0.2673162719723490  
0.1788594581721108 0.4493285891839927 0.2933852532017651  
0.4181260827298270 0.4510042242046663 0.3191059120437761  
0.0675908840064269 0.6257309476936674 0.0832837732813362  
0.0861092416304044 0.4946206948089127 0.0735860757542301  
0.1031597501291006 0.3629601119025986 0.0680442225035677  
0.3027029318024096 0.6339062022370164 0.1255371304436401  
0.3091200002269255 0.5031315276023454 0.0826022943630342  
0.3010637158581166 0.3688858470429505 0.0736347607431990  
0.5135907856212526 0.5421097495449528 0.2804994371494114  
0.5164944036084559 0.3652939207127157 0.2784359016435669  
0.4411377225551460 0.7495710674832496 0.6446847623246263  
0.1980047378194339 0.7501193639539947 0.6516997018701450  
0.2737768839285860 0.7490872404917841 0.0442423215089036  
0.1101673318949171 0.7486494765135214 0.0549485933767598  
0.0618782267616418 0.2490083695241075 0.1423842220447200  
0.3070661980204850 0.2490675677117868 0.1528269204853240  
0.2273240728429156 0.2500622970044444 0.5446383967776530  
0.3921102110591918 0.2492541912208131 0.5518508496315756  
0.5607129267992310 0.2495818940721772 0.3526825883012129  
0.8069923334835911 0.2512648707447605 0.3537943190001551  
0.7287049942602803 0.2480301884460574 0.9683898913709392  
0.8937678652103326 0.2537400599374005 0.9470716748246135  
0.9199380955082767 0.7564313607734675 0.8874417079875632  
0.6924351831221743 0.7433554668135605 0.8601022779432298  
0.7733505810962041 0.7480695891284455 0.4632010612433376  
0.6053845099429079 0.7501236931772048 0.4526974687855346  
0.7991275645654209 0.6733839374312137 0.0706400961312347  
0.6977335141898221 0.7707374009115381 0.1035512238211973  
0.8426368811286159 0.7947741182899750 0.0660330248270098  
0.9179145933952826 0.6761373187840377 0.8229438573307227  
0.6824712530239907 0.8290243181844886 0.8285830631373570  
0.7148672067011418 0.6984255005516176 0.0331201040566643  
0.7602116644318225 0.8210851592653462 0.0419402717917671  
0.8618446520546490 0.7192833847611864 -0.0003029737494619

**Structure files (CONTCAR) involved in this work:****Figure S2 Zn/ZSM-5**

```
1.0000000000000000
20.0219993591000005 0.0000000000000000 0.0000000000000000
0.0000000000000000 19.8990001678000006 0.0000000000000000
0.0000000000000000 0.0000000000000000 13.3830003737999998
```

```
Si O Al Zn C H
94 193 2 2 1 4
```

## Direct

```
0.4224458171259045 0.0598811629060307 0.6487600775535682
0.3046167748326454 0.0318778581904624 0.7915582376771724
0.2819552486557200 0.0563888791127738 0.0171417000128571
0.1221320593944171 0.0648666071429389 0.0130232371259851
0.0675160980837006 0.0321456477659723 0.8012365760452909
0.1799784441523400 0.0649574738005896 0.6642419775245969
0.4185601653453119 0.8275406411512662 0.6690178448692592
0.3007502155483834 0.8731921571451693 0.8005280902297685
0.2671279452152433 0.8305671589115775 0.0193557279183452
0.1112581016015568 0.8266095142553738 0.0117737002381517
0.0656382486123590 0.8748463423444264 0.7982339679315089
0.1788565625038530 0.8290372089928510 0.6645005784535343
0.0761378720298538 0.9416125340600914 0.1483020849880887
0.1949152048646496 0.9702836414034124 0.2902404368996940
0.2163902155991195 0.9436743951812261 0.5158337059287774
0.3766233948526079 0.9356021299453445 0.5137510205371356
0.4330801723715396 0.9681657258390288 0.3015142168359120
0.3198685778928692 0.9352296906694946 0.1642698247328411
0.0816990431461093 0.1737916850519809 0.1677616785347098
0.1989310850362713 0.1291053253458188 0.3007478077668395
0.2322260635886551 0.1699602697722824 0.5187337971893484
0.3881460918961110 0.1738867507038222 0.5092552078693942
0.4357031740492303 0.1265570819065900 0.2957420023621609
0.3199878899207178 0.1721480182974631 0.1656172034243468
0.5760670640280381 0.5553271269578772 0.3575694447656019
0.6891861916543647 0.5270555306451499 0.2010814130532594
0.7122720381103065 0.5693240402516224 0.9883372749575585
0.8727414854831466 0.5725669675867451 0.9878710498609848
0.9264378808980496 0.5320435144415896 0.1939152322449758
0.8100045332781818 0.5526450236303688 0.3377486951398581
0.5727908925282961 0.3287835857531576 0.3329887165218253
0.6941638773410119 0.3723748693016660 0.1943289379328093
0.7292931419338302 0.3271235921684124 0.9813976731095764
0.8838219659778872 0.3272653888247632 0.9974193741565429
0.9408936871006901 0.3785271365636405 0.1943421722912149
0.9185388225148685 0.4448462643945348 0.8605667630516081
0.7999453099916138 0.4736241359173832 0.7193520973676044
0.7724716081892709 0.4376932373962958 0.4931223176655095
0.6148423363819902 0.4288563306239439 0.4918776694283622
0.5680346822992703 0.4696347247910353 0.7045247515032784
0.6757293986016535 0.4477009418822746 0.8577243514257447
0.9203090999140002 0.6781820764488842 0.8329465028336429
0.7700689059793007 0.6687543343965956 0.4655593082334661
0.6147328507923930 0.6733074894344497 0.4877788609267810
0.5607868609162239 0.6278524635741860 0.6982511051011997
```



**Structure files (CONTCAR) involved in this work:**

|                    |                    |                    |
|--------------------|--------------------|--------------------|
| 0.6733830835752102 | 0.6750142644883468 | 0.8249900099537868 |
| 0.5777181705202423 | 0.9453175291890474 | 0.3586725309247996 |
| 0.6983484895270280 | 0.9739980163004631 | 0.2156046356008687 |
| 0.7193256739239970 | 0.9383748686730584 | 0.9936390712946945 |
| 0.8792036596580175 | 0.9349779910112872 | 0.9952920341281981 |
| 0.9316740558718735 | 0.9697064869004137 | 0.2048274884397827 |
| 0.8224755854278527 | 0.9468069092770364 | 0.3552490263737411 |
| 0.5782704102955663 | 0.1736023169803147 | 0.3297528638988965 |
| 0.6982577525352696 | 0.1322792262680395 | 0.1942589485523172 |
| 0.7323971442163781 | 0.1713106374602802 | 0.9731974241005048 |
| 0.8872053452583657 | 0.1740135428356524 | 0.9872749091000870 |
| 0.9368528166643415 | 0.1272098430020989 | 0.1991701209664214 |
| 0.8214571879328716 | 0.1727077883158543 | 0.3312370782671934 |
| 0.9229491955380382 | 0.0557397540203368 | 0.8576473564906166 |
| 0.8025004043384527 | 0.0267637259404410 | 0.7111495598172297 |
| 0.7807631387781129 | 0.0662481298893312 | 0.4927427787920280 |
| 0.6205880393402694 | 0.0699333282151002 | 0.4904575795989672 |
| 0.5677905667181022 | 0.0323537054403005 | 0.6992668447986432 |
| 0.6785584192683700 | 0.0536738182411582 | 0.8495508424915741 |
| 0.9230975445153931 | 0.8304990489850681 | 0.8379059972681873 |
| 0.8034333636452473 | 0.8696809166922250 | 0.6966289302035449 |
| 0.7704290700478253 | 0.8270052967718584 | 0.4790769940135036 |
| 0.6153757091192844 | 0.8269771553140259 | 0.4907724457309754 |
| 0.5638403106282794 | 0.8752261083621349 | 0.6982100197223957 |
| 0.6788669051648739 | 0.8337629391382109 | 0.8328750264269473 |
| 0.4227640632979117 | 0.4422682642369864 | 0.6470802330637895 |
| 0.3046119665432059 | 0.4693949879372568 | 0.7894170681404731 |
| 0.2807962710240091 | 0.4455552170945865 | 0.0149154774213116 |
| 0.1225352171836604 | 0.4372388176421111 | 0.0148618400934026 |
| 0.0638224036706632 | 0.4682980680368516 | 0.8030842977491304 |
| 0.1778087146264582 | 0.4355163368735191 | 0.6659387100803826 |
| 0.4153413093621978 | 0.6736589033316065 | 0.6671523075308841 |
| 0.2996446083029980 | 0.6276962089426092 | 0.7998493503200805 |
| 0.2669450218734823 | 0.6693099853722586 | 0.0186680797672807 |
| 0.1113698727210419 | 0.6725897683344755 | 0.0100829914618785 |
| 0.0631757689608463 | 0.6273830436162697 | 0.7962156390199269 |
| 0.1783174373360907 | 0.6716350109875933 | 0.6643149410805904 |
| 0.0724963552556162 | 0.5590250277484543 | 0.1501285977381812 |
| 0.1920068534704455 | 0.5308779888887614 | 0.2909365848655554 |
| 0.2148576901693389 | 0.5560376903139641 | 0.5173779566645038 |
| 0.3738785092585530 | 0.5656963548513403 | 0.5147250224147086 |
| 0.4300677503960273 | 0.5319126972955672 | 0.3039312973951738 |
| 0.3184770664785219 | 0.5649958279210097 | 0.1643358756443263 |
| 0.0851720126097320 | 0.3270179989815176 | 0.1644646154738965 |
| 0.1990051621959452 | 0.3723388709333122 | 0.2999293006384818 |
| 0.2322944140355645 | 0.3311670672234612 | 0.5198650063836467 |
| 0.3873852320840783 | 0.3280648233284111 | 0.5080120878697940 |
| 0.4315004137612064 | 0.3742670838793813 | 0.2933467532701286 |
| 0.3178106000669771 | 0.3294711376760162 | 0.1609617078080348 |
| 0.3586872316479273 | 0.0706883427265268 | 0.7221041306818989 |
| 0.3156260923211747 | 0.0535453582550076 | 0.9069756878448274 |
| 0.2014879650390284 | 0.0494025575768546 | 0.0094626055476326 |
| 0.0925758619384709 | 0.0708677522768468 | 0.9010288452874633 |

**Structure files (CONTCAR) involved in this work:**

|                    |                    |                    |
|--------------------|--------------------|--------------------|
| 0.1033471321610477 | 0.0649327764302114 | 0.7038046550509520 |
| 0.2291352753939506 | 0.0524250525285765 | 0.7593358277503057 |
| 0.3600801328432937 | 0.8282325857816559 | 0.7529313780660019 |
| 0.3008103896627858 | 0.8625537766456759 | 0.9201312901250631 |
| 0.1885492423792883 | 0.8509087609789105 | 0.0224298744929357 |
| 0.0883283708090516 | 0.8324633434572419 | 0.8961505665947911 |
| 0.1022950858545286 | 0.8426626190977444 | 0.7006394359681423 |
| 0.2287230523504888 | 0.8505718513902423 | 0.7554637955671240 |
| 0.3152491984553834 | 0.9515968169702447 | 0.7748137975412277 |
| 0.0876282812956788 | 0.9530519471791763 | 0.8106960969460459 |
| 0.4333056967159479 | 0.1273064216316016 | 0.5820964699348750 |
| 0.4120500657339434 | 0.9964194209315878 | 0.5742944263718570 |
| 0.3924939000538714 | 0.8645519025039974 | 0.5681725192546310 |
| 0.1960747185298146 | 0.1380066180704134 | 0.6159811407602973 |
| 0.1890396204802016 | 0.0057251202632074 | 0.5823846419667618 |
| 0.1948493591893907 | 0.8721516183964937 | 0.5644434987063889 |
| 0.9875207009977629 | 0.0415118528137768 | 0.7874364396262976 |
| 0.9850871662060854 | 0.8701667903310124 | 0.7848577719678573 |
| 0.1407388749183767 | 0.9322118339564227 | 0.2202489727796078 |
| 0.1830634880242741 | 0.9490923759066590 | 0.4056571681257637 |
| 0.2969432073394174 | 0.9489141647257711 | 0.5085730031444413 |
| 0.4069868767155143 | 0.9312048281818832 | 0.4021214686432941 |
| 0.3962246046072835 | 0.9357317592185410 | 0.2047324663054439 |
| 0.2701351025888243 | 0.9484034207370655 | 0.2586054177781634 |
| 0.1408632830115195 | 0.1744530270223734 | 0.2504941085557491 |
| 0.1959218103728588 | 0.1394844288249146 | 0.4203954651316621 |
| 0.3107268100291805 | 0.1491251094934469 | 0.5165627299221072 |
| 0.4137257362399751 | 0.1680608933129761 | 0.3948637536576030 |
| 0.3969431074222527 | 0.1583628215595354 | 0.1995699977693590 |
| 0.2717962270071226 | 0.1525929052608674 | 0.2597116671371822 |
| 0.1854367070917462 | 0.0507754349881324 | 0.2733530380051761 |
| 0.4156166025329995 | 0.0479618133405779 | 0.3088595107813248 |
| 0.0652396811026250 | 0.8736256914877458 | 0.0828625169716730 |
| 0.0847095568149001 | 0.0046932313648043 | 0.0724522601037023 |
| 0.1073785812192085 | 0.1361441611389083 | 0.0674306150769652 |
| 0.3047171268341984 | 0.8619039886523225 | 0.1159916223982904 |
| 0.3107394542786679 | 0.9940917842883437 | 0.0817323231613685 |
| 0.3015188012188048 | 0.1276837212865800 | 0.0680312317306999 |
| 0.5126786866309487 | 0.9556977503555046 | 0.2879359836585351 |
| 0.5159301440345203 | 0.1331439478321457 | 0.2791390529971167 |
| 0.6397007854953145 | 0.5587922575345416 | 0.2836660557863411 |
| 0.6901332377951306 | 0.5763957950386853 | 0.1047543004512903 |
| 0.7928587055815086 | 0.5613481893229633 | 0.9764696285155381 |
| 0.8920843651445836 | 0.5765366136785559 | 0.1065593864328207 |
| 0.8870657093025471 | 0.5394065562180970 | 0.3014820065359558 |
| 0.7643231564220301 | 0.5267433178959706 | 0.2476383344420725 |
| 0.6402258884116705 | 0.3367511966192183 | 0.2682484919502599 |
| 0.6903265929261266 | 0.3335486403347474 | 0.0870933440701762 |
| 0.8065184891771651 | 0.3519115652035723 | 0.9947228158628647 |
| 0.9092360897633611 | 0.3265498303510910 | 0.1139544578421692 |
| 0.9071790275328340 | 0.3676268759903891 | 0.3060124301589155 |
| 0.7678194760881709 | 0.3693011628358178 | 0.2416436781048006 |
| 0.6698968313445874 | 0.4501405743726039 | 0.1746949215036224 |

**Structure files (CONTCAR) involved in this work:**

|                    |                    |                    |
|--------------------|--------------------|--------------------|
| 0.9236488220873014 | 0.4541753608489643 | 0.1577034847892236 |
| 0.5696215268274472 | 0.6271393846893929 | 0.4140443479233937 |
| 0.5849660358211608 | 0.4966456598774300 | 0.4412253087033378 |
| 0.5810121683718492 | 0.3625973743155697 | 0.4434009386756230 |
| 0.7995212172715753 | 0.6313095077973543 | 0.3659110345514947 |
| 0.7932291896643875 | 0.5118186208198878 | 0.4430212643052300 |
| 0.8202561359492080 | 0.3818250647988464 | 0.4425920678160153 |
| 0.0037452475306239 | 0.5525392921334245 | 0.2149027457100132 |
| 0.0206033289176020 | 0.3684377872895652 | 0.2053894567582901 |
| 0.8544426058641079 | 0.4337212298211668 | 0.7868818586908475 |
| 0.7889094898401581 | 0.4377597468600882 | 0.6112729189879573 |
| 0.6947863083272381 | 0.4248115138634390 | 0.4699682208696814 |
| 0.6011696876718489 | 0.4292504957242116 | 0.6108502905911948 |
| 0.6021509930404463 | 0.4441883262248965 | 0.8076017994050062 |
| 0.7284326641396106 | 0.4750459594239231 | 0.7745387147844482 |
| 0.8601024143603269 | 0.6811901582788806 | 0.7550845581863896 |
| 0.8153238616805396 | 0.6423587432310427 | 0.5611632656161873 |
| 0.6925178478873733 | 0.6476185611308907 | 0.4850274791700926 |
| 0.5857760367929785 | 0.6684639183555419 | 0.5999982566275648 |
| 0.5948683355470479 | 0.6615970152496899 | 0.7963260907915028 |
| 0.7198227978768372 | 0.6500754066585159 | 0.7337734542536936 |
| 0.8262235114816363 | 0.5498903701712976 | 0.6967088328380981 |
| 0.5816072470671187 | 0.5492637650118581 | 0.6875911385573019 |
| 0.9284666697605601 | 0.3785165954768601 | 0.9304816143289187 |
| 0.9097702484214238 | 0.5096359397198427 | 0.9334667023994356 |
| 0.8978158388875244 | 0.6420135871304709 | 0.9376712569269259 |
| 0.6945999605743154 | 0.3730322869353913 | 0.8959446121688828 |
| 0.6759188928549875 | 0.5011565814020784 | 0.9489436809795748 |
| 0.6885036204405495 | 0.6354913715303852 | 0.9291159231809374 |
| 0.4889928906416046 | 0.4533312855233973 | 0.7145309092818124 |
| 0.4800509518800169 | 0.6329299112378237 | 0.7082699748318646 |
| 0.6434946099955496 | 0.9401523577786222 | 0.2888069838710550 |
| 0.6984669096083209 | 0.9334534288902034 | 0.1104391602406807 |
| 0.7996351511279869 | 0.9473076757665737 | 0.9810329771801136 |
| 0.8984024353129598 | 0.9282703755898467 | 0.1126056411585097 |
| 0.8976537237189746 | 0.9484410351997141 | 0.3101259110267094 |
| 0.7716960617860096 | 0.9679033232965182 | 0.2660189451683337 |
| 0.6411118006069429 | 0.1737486972384161 | 0.2537969167935472 |
| 0.6960916076484622 | 0.1574006421336733 | 0.0792677958469667 |
| 0.8102169186420554 | 0.1480165534526989 | 0.9817527984004215 |
| 0.9140762020387214 | 0.1693711299938698 | 0.1011094017027006 |
| 0.8977739092368466 | 0.1534838645621903 | 0.2976355383382128 |
| 0.7712615561721989 | 0.1458333406135850 | 0.2428626259847775 |
| 0.6803364244402701 | 0.0526399189571976 | 0.1985347085827200 |
| 0.9200412902116213 | 0.0486700325784213 | 0.1805346481535750 |
| 0.5700212857264262 | 0.8754944076730951 | 0.4209219648879525 |
| 0.5819882788597113 | 0.0074746102869128 | 0.4373929357989113 |
| 0.5996626909451237 | 0.1396374726253313 | 0.4356141331363901 |
| 0.8081046197609041 | 0.8709798497213868 | 0.3945091658309394 |
| 0.8165503413153701 | 0.9993822423458525 | 0.4475091014603692 |
| 0.8047766854535467 | 0.1336693307559571 | 0.4356120120345182 |
| 0.0106405448724516 | 0.9533549558784244 | 0.2169791812764146 |
| 0.0167597512436828 | 0.1372131374169925 | 0.2160669976935807 |

**Structure files (CONTCAR) involved in this work:**

|                    |                    |                    |
|--------------------|--------------------|--------------------|
| 0.8570185561383923 | 0.0576974908352383 | 0.7876925443688947 |
| 0.8015599441698740 | 0.0718832503538138 | 0.6099450964451663 |
| 0.7003387784416759 | 0.0572392783461453 | 0.4809933635905494 |
| 0.5983504406418660 | 0.0758509755360990 | 0.6068205055524984 |
| 0.6035787436858797 | 0.0527962399621345 | 0.8036868645204791 |
| 0.7290860075750629 | 0.0283833279721861 | 0.7623476310761248 |
| 0.8594598304801693 | 0.8330579005184759 | 0.7637923051131494 |
| 0.8058794977235806 | 0.8349324636677764 | 0.5871499291771727 |
| 0.6929987535361661 | 0.8515323932259022 | 0.4863404387828822 |
| 0.5890195461687426 | 0.8290821159656048 | 0.6052931421892396 |
| 0.6029453970826708 | 0.8530832733451703 | 0.7993665972073600 |
| 0.7297807750043077 | 0.8597094338622071 | 0.7456813324935467 |
| 0.8206735248094290 | 0.9491071073502013 | 0.6854472762246928 |
| 0.5795105402358871 | 0.9534219922170806 | 0.6727995073982740 |
| 0.9321285377025106 | 0.1283005191862614 | 0.9124583808481717 |
| 0.9181109230924633 | 0.9979106301000087 | 0.9436025941372677 |
| 0.9027081309769400 | 0.8653569844282458 | 0.9433018415687044 |
| 0.6961501315596834 | 0.1295935409266988 | 0.8845374072309014 |
| 0.6824785968416549 | 0.0036181004656441 | 0.9453540457315981 |
| 0.6958485644088839 | 0.8697847387409041 | 0.9386931661939499 |
| 0.4888649026166263 | 0.0477114718195111 | 0.7154045614224458 |
| 0.4841392631658579 | 0.8646351348492942 | 0.7148575969184208 |
| 0.3590693981898738 | 0.4305646134049042 | 0.7204630896645554 |
| 0.3154748605288020 | 0.4491079851708548 | 0.9054946516028721 |
| 0.2007058693560637 | 0.4579055219204378 | 0.0067043197861949 |
| 0.0897247829022234 | 0.4327296904456475 | 0.9050018745134878 |
| 0.1018248078757082 | 0.4344414433646193 | 0.7082706479178071 |
| 0.2292031480454000 | 0.4476210827432254 | 0.7583418205697612 |
| 0.3581785194577805 | 0.6742039351882454 | 0.7532116370614119 |
| 0.3004349486394204 | 0.6367590864754433 | 0.9196886720780668 |
| 0.1885108534424447 | 0.6482029627586030 | 0.0224463563639503 |
| 0.0893816650053125 | 0.6678247707435148 | 0.8940466516578098 |
| 0.1014152100719059 | 0.6574311668622244 | 0.6982890012847633 |
| 0.2270635929766769 | 0.6500368143235846 | 0.7566384476586450 |
| 0.3145547516053995 | 0.5496957868504708 | 0.7713001181464634 |
| 0.0809419677240228 | 0.5480670893388506 | 0.8081320133120116 |
| 0.4338732243894441 | 0.3765252320867702 | 0.5765195193376016 |
| 0.4129968650258391 | 0.5075289894575405 | 0.5759456100763884 |
| 0.3851854862205855 | 0.6382747033039848 | 0.5672677758536366 |
| 0.1931521950568182 | 0.3631832413035667 | 0.6145975757086148 |
| 0.1847586443669371 | 0.4957987928528169 | 0.5850826805164289 |
| 0.1961854833938759 | 0.6287123869523015 | 0.5646099027887459 |
| 0.9841757492694896 | 0.4552004882301688 | 0.7909663830706322 |
| 0.9832224658154871 | 0.6369118758292416 | 0.7835278418417460 |
| 0.1350110723553399 | 0.5689860660042498 | 0.2258350597062915 |
| 0.1817632842014874 | 0.5507724873679507 | 0.4070981099998647 |
| 0.2951666302821607 | 0.5470247569276907 | 0.5100798130181019 |
| 0.4042715110229693 | 0.5706474276219495 | 0.4031136679184755 |
| 0.3942444484423504 | 0.5648478541780193 | 0.2069764728470673 |
| 0.2662939620158724 | 0.5536290217737871 | 0.2562358920199088 |
| 0.1404507147720864 | 0.3259576132951025 | 0.2528825021176999 |
| 0.1993558959826984 | 0.3618520884873959 | 0.4192729913079418 |
| 0.3104450379489094 | 0.3528324328553936 | 0.5220760040497083 |

**Structure files (CONTCAR) involved in this work:**

0.4085402021207827 0.3313626067461826 0.3910215458954198  
0.3943649007830459 0.3459996992138699 0.1935930784819249  
0.2709951384723581 0.3501051611221939 0.2557230421520984  
0.1834577498555419 0.4503804716618518 0.2727461712180741  
0.4115832190210682 0.4524608709663767 0.3122695232125494  
0.0646323454404296 0.6244514580302578 0.0786145523842947  
0.0824043454955330 0.4924086713011278 0.0814458418389066  
0.1154528805414401 0.3633373917035811 0.0657210934835888  
0.3049047819218487 0.6380658557457934 0.1148434078913638  
0.3118182559188654 0.5048247960794896 0.0833647413551404  
0.2964956537712595 0.3720844231787837 0.0625374165896346  
0.5099913446832147 0.5415240925905422 0.2910763028428462  
0.5113154716710540 0.3659236825047998 0.2751055826305375  
0.4360958577233305 0.7502958248241072 0.6404575101450405  
0.1887989531117995 0.7502904436668132 0.6371598742998046  
0.2759399134065887 0.7498772214230343 0.0193584355367875  
0.1029355715180600 0.7493727856147245 0.0483740526280272  
0.0636442045558425 0.2508097795188107 0.1373671392368365  
0.3095418462054909 0.2503763160170180 0.1350530140968544  
0.2238075989770891 0.2506261599959885 0.5226044090608895  
0.3952184459982604 0.2511759142441647 0.5461961835107942  
0.5553129752685351 0.2503155407588054 0.3510339931735444  
0.8156393112131113 0.2518517055591687 0.3473094872137423  
0.7270179998910535 0.2499968926932823 0.9430772720186482  
0.8920636707534939 0.2521305191864514 0.9522126007332403  
0.9453459419607171 0.7538010447649057 0.8612394811098056  
0.6851905649928014 0.7539156129655140 0.8494293465477725  
0.7760560580282885 0.7485184757589778 0.4468460823468305  
0.6100051592410978 0.7504570872270833 0.4494272376667325  
0.9345257789171413 0.4961441199997338 0.5154811070071048  
0.8219789999504314 0.3361262140795489 0.3286607504126735  
0.7999803014921270 0.6360069555185035 0.6947132770923830  
0.9173494666417596 0.4303201263064835 0.4238755886629733  
0.8739783764424232 0.5573342237851051 0.5578430831854746  
0.0547303013462752 0.4215657377229434 0.4453928870767143  
0.1068981112327378 0.4271196672455062 0.4678171444943899  
0.0504832853431623 0.4385420169187100 0.3675444748566434  
0.0415769043880516 0.3680656992306410 0.4513233905825231  
0.0249477329343364 0.4534225726444205 0.4956041011720345

**Figure S2 Fe/ZSM-5**

1.0000000000000000

20.0219993591000005 0.0000000000000000 0.0000000000000000

0.0000000000000000 19.8990001678000006 0.0000000000000000

0.0000000000000000 0.0000000000000000 13.3830003737999998

Si O Al Fe C H

94 193 2 2 1 4

**Direct**

0.4235487650649133 0.0565054356072345 0.6459751515240661

0.3063976853862824 0.0280401985454587 0.7919570041824218

0.2812013428588037 0.0613389231419744 0.0131069979123886

0.1206100719664116 0.0660547928983591 0.0092300269853825

0.0672732724649069 0.0314334379737227 0.7965556660550296

0.1823483326949196 0.0580637519708096 0.6590709292443405

**Structure files (CONTCAR) involved in this work:**

0.4186582930532850 0.8269574826341387 0.6650883803459096  
0.3053207860195994 0.8694986883003365 0.8087174441813423  
0.2680932652983389 0.8297444983770995 0.0263115245698016  
0.1135677076477207 0.8266880256943226 0.0108456850026668  
0.0659777743665851 0.8725326963388899 0.7971543441851061  
0.1846112243577668 0.8285562286650877 0.6727778380287306  
0.0793011546942173 0.9421814625389084 0.1467773944591777  
0.1959490870333885 0.9699887834363535 0.2941497860834241  
0.2197625739649396 0.9388654012952528 0.5136437503575002  
0.3788484436475585 0.9339059209947722 0.5091643342786757  
0.4347261226424473 0.9688704870174761 0.2989828733734919  
0.3196500693293919 0.9422776321133677 0.1611165109037861  
0.0817881297128606 0.1722009663835111 0.1687340406227233  
0.1982530445644516 0.1284892756163226 0.3079645212980964  
0.2351352304430112 0.1709857081991550 0.5243110692897729  
0.3896810893597641 0.1729592557172309 0.5094825880327674  
0.4381850524046216 0.1271951919345078 0.2978897163771565  
0.3192743175090297 0.1694282228706160 0.1720668562196352  
0.5784046399775581 0.5551102181731674 0.3537138230809967  
0.6959743869843296 0.5277390468870170 0.2045328524015820  
0.7189437459664656 0.5591619004083495 0.9870043750912824  
0.8786365417839342 0.5692848260040507 0.9932085514022223  
0.9350513488483843 0.5304141986587815 0.2026576982019982  
0.8188323468707527 0.5567736196551623 0.3379411457187817  
0.5801684403258154 0.3276543638611166 0.3377994942305370  
0.6993986224971332 0.3688836849305524 0.1974541208255565  
0.7320327987561567 0.3233622738986899 0.9812927142813354  
0.8865083561813127 0.3291529510650946 0.9953077472764350  
0.9371212944706382 0.3724447420185575 0.2055263031929760  
0.8205767711132578 0.3307682741807520 0.3346431976087764  
0.9231264020210906 0.4461736592383274 0.8569404375448112  
0.8032534834996824 0.4694220633154426 0.7137730538235469  
0.7799903356894025 0.4387324277480356 0.4894453670535300  
0.6189050139597861 0.4332390688809638 0.4955074567890108  
0.5664861988845789 0.4700420737133899 0.7092651625336781  
0.6796325534299494 0.4362131726547248 0.8467014396605460  
0.7992395939729501 0.6284855002170633 0.6918904544488332  
0.7672495063906707 0.6670861559540135 0.4730269861554849  
0.6115458444342277 0.6722242023096778 0.4865226082965188  
0.5640631679149928 0.6288394620066816 0.7034575973611669  
0.6811886264601392 0.6708189805877723 0.8272437585092108  
0.5792126516587163 0.9415135123886662 0.3495331209193803  
0.6953938650686498 0.9718084381403024 0.2043913899801628  
0.7224851311502255 0.9410397276242651 0.9835515054185086  
0.8804937770962118 0.9430797382037576 0.9862280529540893  
0.9358828423180420 0.9684853232941826 0.1987482095139065  
0.8189240441117831 0.9362082678487579 0.3303262756878573  
0.5822145177213227 0.1737702029561246 0.3250159075652757  
0.6980560792072036 0.1301793055009519 0.1895630144960304  
0.7379096409999959 0.1645025315466434 0.9718277705474491  
0.8927522935184463 0.1751490197844974 0.9833894484862724  
0.9395723811562101 0.1270087018060176 0.1980100765987842  
0.8200336935807524 0.1729628437565378 0.3224864246083812

**Structure files (CONTCAR) involved in this work:**

|                    |                    |                    |
|--------------------|--------------------|--------------------|
| 0.9238172140440808 | 0.0631100812468395 | 0.8440844666434446 |
| 0.8093575530795913 | 0.0299145497228973 | 0.6970292093950267 |
| 0.7833650937997624 | 0.0583446712271809 | 0.4764999512862714 |
| 0.6234832707167088 | 0.0662832550190741 | 0.4832513130872233 |
| 0.5676729299387250 | 0.0324169165105234 | 0.6932660473850262 |
| 0.6848312544567740 | 0.0553449001470135 | 0.8264553018452674 |
| 0.9188098773500947 | 0.8321783862950437 | 0.8257031894462782 |
| 0.8059565477154531 | 0.8729225104222360 | 0.6839555055361014 |
| 0.7691732112660851 | 0.8279114979414972 | 0.4714722114771498 |
| 0.6130135469785974 | 0.8260619947290190 | 0.4887625926267965 |
| 0.5628452816494164 | 0.8746071371614722 | 0.6990603771417426 |
| 0.4233625692409814 | 0.4420442673719098 | 0.6528075221665592 |
| 0.3062943789002781 | 0.4715529262044477 | 0.7974892968206713 |
| 0.2832791040620474 | 0.4389825074859642 | 0.0194669224983081 |
| 0.1228680552069961 | 0.4332458216184289 | 0.0156395255326716 |
| 0.0688700903857693 | 0.4671826658912734 | 0.8039480846902429 |
| 0.1825080587925569 | 0.4408952231560469 | 0.6663341151485326 |
| 0.4195482715570574 | 0.6735915070703969 | 0.6693182157235575 |
| 0.3061535730469377 | 0.6302374826367971 | 0.8115461390330075 |
| 0.2682317294691808 | 0.6701059796478261 | 0.0284073602997347 |
| 0.1138846990782993 | 0.6721526334978745 | 0.0103894505354968 |
| 0.0667036467504434 | 0.6250175076245109 | 0.7972076028618631 |
| 0.1860940098560970 | 0.6700945428383245 | 0.6736900943039841 |
| 0.0792024205848307 | 0.5580066027470556 | 0.1496257492688297 |
| 0.1955474789317355 | 0.5292457941434934 | 0.2963968622870624 |
| 0.2212961429859912 | 0.5590745224416939 | 0.5176788619142679 |
| 0.3804053550679709 | 0.5636007857656397 | 0.5135205098398244 |
| 0.4349108472439513 | 0.5303135029851244 | 0.3016835876097374 |
| 0.3200475351934722 | 0.5594132091622591 | 0.1658162721367532 |
| 0.0814457260810877 | 0.3259352702781629 | 0.1732526440963778 |
| 0.1975438937566693 | 0.3705048829966434 | 0.3107284299642866 |
| 0.2360668553805655 | 0.3305243322813273 | 0.5283016908312244 |
| 0.3908258216652605 | 0.3267972584568445 | 0.5156810037793178 |
| 0.4382066519547796 | 0.3723335322839237 | 0.3016599269722642 |
| 0.3195876381014254 | 0.3278829835833162 | 0.1757020904038472 |
| 0.3580385554599826 | 0.0647800775255798 | 0.7163833646922105 |
| 0.3127473914719368 | 0.0623606318258553 | 0.9014583742557265 |
| 0.2006047071653057 | 0.0545766798811113 | 0.0079503405717957 |
| 0.0916852259494555 | 0.0705068281510241 | 0.8965507280878624 |
| 0.1060923779351357 | 0.0604134006597821 | 0.6995195761604720 |
| 0.2302575086911854 | 0.0370836024778369 | 0.7521464768839833 |
| 0.3597477656957890 | 0.8254678388820629 | 0.7484101877751627 |
| 0.3087615563340871 | 0.8492199878848521 | 0.9256783353221900 |
| 0.1904785602586461 | 0.8530874237301854 | 0.0140426937989194 |
| 0.0858223500633198 | 0.8314031430619792 | 0.8973736897942527 |
| 0.1067428205591338 | 0.8424214454043832 | 0.7021589377421097 |
| 0.2305528698761377 | 0.8538269583164773 | 0.7663356977302214 |
| 0.3237969063205214 | 0.9484095144800969 | 0.7955801162231185 |
| 0.0824564899836307 | 0.9516812078366627 | 0.8114382878355790 |
| 0.4337465769016554 | 0.1247571233549190 | 0.5811531758594974 |
| 0.4168752676256038 | 0.9933010778035528 | 0.5697318418476272 |
| 0.3912552708925782 | 0.8620913167663717 | 0.5632749745960987 |
| 0.2020428484709066 | 0.1320961942167166 | 0.6183329188799258 |

**Structure files (CONTCAR) involved in this work:**

|                    |                    |                    |
|--------------------|--------------------|--------------------|
| 0.1869794068074932 | 0.0030270242164744 | 0.5699362937373659 |
| 0.2036722028315508 | 0.8692788295031508 | 0.5717629207861371 |
| 0.9883420931496459 | 0.0445549034005650 | 0.7763660181223471 |
| 0.9864009110268437 | 0.8624365368757552 | 0.7771499253754104 |
| 0.1454173222389658 | 0.9343593836131106 | 0.2157371830230229 |
| 0.1877762371341680 | 0.9341150776609926 | 0.4022918182581728 |
| 0.2996813395302973 | 0.9510116109571658 | 0.5067709496422438 |
| 0.4080376996897854 | 0.9285085468092582 | 0.3966141414717367 |
| 0.3964995084855735 | 0.9430391341552725 | 0.1991581822313401 |
| 0.2724045411279284 | 0.9612680774030653 | 0.2559407538274990 |
| 0.1446584468938703 | 0.1716558526461919 | 0.2446595713257124 |
| 0.1943896321462088 | 0.1527183297567666 | 0.4231506807955274 |
| 0.3123864225292738 | 0.1474543517859288 | 0.5107305517024879 |
| 0.4175917476626881 | 0.1706082409984320 | 0.3958937660504164 |
| 0.3969890209885726 | 0.1555611966811135 | 0.2017263859396873 |
| 0.2728791951800292 | 0.1415396788690790 | 0.2635353022463179 |
| 0.1784736520559117 | 0.0495724670231292 | 0.3002969759099869 |
| 0.4207110567737358 | 0.0485608355378103 | 0.3165723060336169 |
| 0.0682548383135465 | 0.8727734902940044 | 0.0845808740885827 |
| 0.0857435484015429 | 0.0038446771790889 | 0.0678806986003658 |
| 0.1020580738294932 | 0.1362024725406225 | 0.0641549441759491 |
| 0.3015295776606810 | 0.8676221126900151 | 0.1209864093360654 |
| 0.3106530290616444 | 0.9965344198821122 | 0.0717745223900365 |
| 0.3015089138626594 | 0.1308446213633138 | 0.0685973779495205 |
| 0.5135370783573140 | 0.9539293698810729 | 0.2809564661153032 |
| 0.5177321700970691 | 0.1356143169944715 | 0.2771529512647508 |
| 0.6448763059098209 | 0.5601465551859369 | 0.2847983817006922 |
| 0.6865340031594882 | 0.5656934094966160 | 0.0977446010784866 |
| 0.7994616958098731 | 0.5531424270124010 | 0.9950921362199929 |
| 0.9080669649309391 | 0.5715230302033976 | 0.1056095841234225 |
| 0.8963533102635525 | 0.5553656617947988 | 0.3023511933942208 |
| 0.7724513765509813 | 0.5379965879620592 | 0.2418923779812762 |
| 0.6458588496099186 | 0.3313982279335825 | 0.2679171164297661 |
| 0.6948720215712640 | 0.3356418673674654 | 0.0873902685822465 |
| 0.8083147462286828 | 0.3516193688068329 | 0.9890920968312821 |
| 0.9118050337801561 | 0.3285298798850389 | 0.1104413007332470 |
| 0.8980291474603317 | 0.3466192223021317 | 0.3050529932896377 |
| 0.7739349082526242 | 0.3587436975514025 | 0.2435311737367833 |
| 0.6810196700479215 | 0.4481554623459629 | 0.1912279769515234 |
| 0.9211251620109965 | 0.4510500686125870 | 0.1833258883313374 |
| 0.5669575547022717 | 0.6256230314273802 | 0.4124688932833165 |
| 0.5845371846879105 | 0.4950699218455436 | 0.4353880908245955 |
| 0.5964713377921806 | 0.3625700928985939 | 0.4448881002084160 |
| 0.8012241876308489 | 0.6319767942115609 | 0.3761462122185442 |
| 0.8079902590678688 | 0.5022512367278391 | 0.4262963383011281 |
| 0.8024170600232190 | 0.3681519583784986 | 0.4387755686974523 |
| 0.0138981092751405 | 0.5456486276332922 | 0.2192830089723401 |
| 0.0168162951987959 | 0.3629494343535627 | 0.2225001669858079 |
| 0.8587974540180432 | 0.4344286991273979 | 0.7853547762595043 |
| 0.8116722987381259 | 0.4415926037018332 | 0.6007743603800427 |
| 0.6991656516619482 | 0.4427874543233452 | 0.4925847349560658 |
| 0.5928888064601808 | 0.4320091040174985 | 0.6096631487243633 |
| 0.6031641941687444 | 0.4395282546885944 | 0.8073958215985286 |



**Structure files (CONTCAR) involved in this work:**

|                    |                    |                     |
|--------------------|--------------------|---------------------|
| 0.7288706294834101 | 0.4496791002965312 | 0.7523337235666746  |
| 0.8524038571289042 | 0.6754720148672622 | 0.7457910044788429  |
| 0.8032527502349239 | 0.6372568997439332 | 0.5717288814625250  |
| 0.6885833405031412 | 0.6472245533208032 | 0.4785639367646535  |
| 0.5860384788168737 | 0.6656530187639396 | 0.6007948848444572  |
| 0.6025830480344943 | 0.6644020071829247 | 0.7977603485111935  |
| 0.7235581520860049 | 0.6483902510177378 | 0.7295126233989807  |
| 0.8130916666193354 | 0.5500565505606175 | 0.7204266541880613  |
| 0.5835817767861383 | 0.5497272751189254 | 0.6994834413034828  |
| 0.9310021001725021 | 0.3815717299569322 | 0.9305544026518189  |
| 0.9162455620891229 | 0.5139385378081192 | 0.9248185615005851  |
| 0.8926034954780643 | 0.6439841472362319 | 0.9450891280932266  |
| 0.6928095406312373 | 0.3622835837448998 | 0.8928774862302009  |
| 0.6904165048686683 | 0.4926144172324727 | 0.9329569983714007  |
| 0.6993866574857182 | 0.6268071316549713 | 0.9259157981981316  |
| 0.4870986170328959 | 0.4568014145588139 | 0.7244304618862966  |
| 0.4841360428067051 | 0.6366051042552259 | 0.7187149162731336  |
| 0.6435857532315794 | 0.9323106141159894 | 0.2765506357756883  |
| 0.6839230891135321 | 0.9477864599918813 | 0.0896708371836902  |
| 0.8012749360108716 | 0.9575705476409135 | -0.0027886256033456 |
| 0.9137010955811631 | 0.9320424113511688 | 0.0949989235352751  |
| 0.8960005043595659 | 0.9362210467305400 | 0.2925582253568150  |
| 0.7718376169008867 | 0.9539633496224108 | 0.2345959216988629  |
| 0.6405548228942726 | 0.1761900739181088 | 0.2404092146852067  |
| 0.6964869460428351 | 0.1398209632074010 | 0.0695298074860609  |
| 0.8165899283115915 | 0.1460240386075240 | 0.9851323841886657  |
| 0.9244781699349114 | 0.1654996601266060 | 0.0936422143376320  |
| 0.8971687618313043 | 0.1614973376960557 | 0.2881000171789960  |
| 0.7715369786257814 | 0.1527696611521571 | 0.2292743152591766  |
| 0.6828490271266604 | 0.0521190032460965 | 0.2176740684828437  |
| 0.9191667892089879 | 0.0482354763680994 | 0.1893007438293173  |
| 0.5692769022025213 | 0.8735684384468028 | 0.4148346341774554  |
| 0.5877683035685998 | 0.0047060123738383 | 0.4247567795921997  |
| 0.6091882956982897 | 0.1361353008122149 | 0.4246424672887184  |
| 0.8000841898736096 | 0.8619745625366430 | 0.3713268683946691  |
| 0.8099130999754398 | 0.9928096285571505 | 0.4165097616718254  |
| 0.8028083512638948 | 0.1274176856515107 | 0.4192842545014727  |
| 0.0149078580116488 | 0.9552229914194643 | 0.2179829943505358  |
| 0.0189983728527550 | 0.1339732021180217 | 0.2218313038397033  |
| 0.8583511960965293 | 0.0696785985566148 | 0.7735692765583074  |
| 0.8190705361387245 | 0.0599567524155613 | 0.5853838921919744  |
| 0.7031087529508789 | 0.0525339369705408 | 0.4890328741670010  |
| 0.5919260874473559 | 0.0729623703679303 | 0.5940827392644216  |
| 0.6080044618678581 | 0.0608159899284041 | 0.7898817519612287  |
| 0.7319324878902844 | 0.0404607094922301 | 0.7300559595099275  |
| 0.8621797730554167 | 0.8276434020484759 | 0.7410076993396707  |
| 0.8114385868558932 | 0.8563107836355655 | 0.5655917045590945  |
| 0.6909974595016668 | 0.8489816070553128 | 0.4826260101832358  |
| 0.5863981602631215 | 0.8304989386903917 | 0.6024012621194926  |
| 0.5991343451990121 | 0.8478680301444331 | 0.7985846596245557  |
| 0.7327410595194782 | 0.8573052324189805 | 0.7257837543332766  |
| 0.8284155226037446 | 0.9508512534808700 | 0.7023943241855762  |
| 0.5816547093243002 | 0.9529823447993424 | 0.6763562510259260  |

**Structure files (CONTCAR) involved in this work:**

|                    |                    |                    |
|--------------------|--------------------|--------------------|
| 0.9359767668859018 | 0.1343116026460438 | 0.9005961772211079 |
| 0.9154727684835740 | 0.0054655409805126 | 0.9295306394148583 |
| 0.8931722589891992 | 0.8742491212818283 | 0.9231808354409163 |
| 0.7072110180619897 | 0.1259734564602689 | 0.8761007814529544 |
| 0.6899199893084536 | 0.9933067949143849 | 0.9051837319059055 |
| 0.7136476914487276 | 0.8643135336882842 | 0.9401175702756575 |
| 0.4890410566504411 | 0.0461935251500091 | 0.7154294201593908 |
| 0.4819538591158672 | 0.8676784012994716 | 0.7100691321217939 |
| 0.3569158685429724 | 0.4340945226182457 | 0.7211160335449548 |
| 0.3147217277496065 | 0.4389265884363877 | 0.9077361886006196 |
| 0.2027307563032039 | 0.4456785506251700 | 0.0152834527699515 |
| 0.0948515290992685 | 0.4275095002393062 | 0.9027215801770530 |
| 0.1058407260707894 | 0.4374711932820428 | 0.7052487360875828 |
| 0.2296854180961865 | 0.4609224715081139 | 0.7608896638953198 |
| 0.3610173872878289 | 0.6747780886575070 | 0.7527904127722730 |
| 0.3094970499683120 | 0.6493218586288865 | 0.9289015280531744 |
| 0.1909020001326942 | 0.6461347001477648 | 0.0163347811643195 |
| 0.0875297700688230 | 0.6680689446519571 | 0.8965312529214194 |
| 0.1090454535449599 | 0.6537427571582485 | 0.7020120946225921 |
| 0.2320711861933752 | 0.6468637091414411 | 0.7683376711362515 |
| 0.3239796718815748 | 0.5512518096949326 | 0.7968560509402620 |
| 0.0859697638046308 | 0.5464884263336433 | 0.8171121005573811 |
| 0.4347880302223833 | 0.3722571605049038 | 0.5919581247999885 |
| 0.4174864870230596 | 0.5032064053110662 | 0.5729567096284310 |
| 0.3938541167430982 | 0.6344914818252524 | 0.5698572046887538 |
| 0.2032360271088757 | 0.3674808767402361 | 0.6241416520005058 |
| 0.1886731469262547 | 0.4970120679935564 | 0.5789573833377781 |
| 0.2075178754046261 | 0.6302493018618379 | 0.5727695164483619 |
| 0.9894314228485098 | 0.4538194331226315 | 0.7886503727683186 |
| 0.9886622300288207 | 0.6339898339553902 | 0.7755437166515111 |
| 0.1441689967773521 | 0.5668151912095419 | 0.2210383243622836 |
| 0.1872949749772951 | 0.5607245625288891 | 0.4074749333039629 |
| 0.3012250890631116 | 0.5469212823975372 | 0.5084566006360385 |
| 0.4111146847781342 | 0.5695002256899552 | 0.4019817522204990 |
| 0.3966818463703001 | 0.5606656986327369 | 0.2048799236295440 |
| 0.2720302409252010 | 0.5408271539567441 | 0.2599246801992325 |
| 0.1415615991277993 | 0.3256575502751275 | 0.2544482296355452 |
| 0.1955783013535939 | 0.3524406610705861 | 0.4284993039167931 |
| 0.3138035246887529 | 0.3531389126567155 | 0.5163051563311207 |
| 0.4200843759291352 | 0.3320649285069803 | 0.4033240809306280 |
| 0.3970629157536522 | 0.3396365616135053 | 0.2086565126688321 |
| 0.2714682911923580 | 0.3537718621504002 | 0.2663843631198489 |
| 0.1791072329015693 | 0.4492347767982255 | 0.2944146094587471 |
| 0.4178768423477750 | 0.4508234473507804 | 0.3141314651196609 |
| 0.0684091325487209 | 0.6262958128760715 | 0.0845853323781390 |
| 0.0868355734357708 | 0.4952648077686210 | 0.0730259280495627 |
| 0.1052651662345842 | 0.3632496811967980 | 0.0716001453363758 |
| 0.3015905986078616 | 0.6335111634389606 | 0.1241301485842715 |
| 0.3128860554495720 | 0.5036356415772487 | 0.0782955719424422 |
| 0.3041148787496596 | 0.3691826514131917 | 0.0737554649123506 |
| 0.5142958532903854 | 0.5413928724978847 | 0.2825282468154267 |
| 0.5180739263630019 | 0.3649068774062351 | 0.2812989931804595 |
| 0.4385613794341168 | 0.7499279106832942 | 0.6381330498131479 |

**Structure files (CONTCAR) involved in this work:**

|                    |                    |                    |
|--------------------|--------------------|--------------------|
| 0.1963852001044603 | 0.7494848715414048 | 0.6512839363983605 |
| 0.2721923886851950 | 0.7500569976479271 | 0.0471878349253771 |
| 0.1080657728383030 | 0.7494767274427140 | 0.0485567643285551 |
| 0.0620792086734797 | 0.2493809664030295 | 0.1440811798993295 |
| 0.3062983098787181 | 0.2488898006276006 | 0.1538884600630275 |
| 0.2306865714165131 | 0.2505258096811230 | 0.5467650185794914 |
| 0.3951050181134568 | 0.2491590936728023 | 0.5517463216197123 |
| 0.5618420785409660 | 0.2495315020592487 | 0.3572918467540422 |
| 0.8087182580082468 | 0.2510834837449885 | 0.3520751127576356 |
| 0.7302848592723276 | 0.2443894208781758 | 0.9539363629545152 |
| 0.8949019839284635 | 0.2537044597756291 | 0.9512665013087955 |
| 0.9300029898466046 | 0.7564680825476534 | 0.8727674810913751 |
| 0.6992871241581300 | 0.7480610410559575 | 0.8631151166035033 |
| 0.7770362334192741 | 0.7472870703582190 | 0.4634395738950334 |
| 0.6042756692694633 | 0.7493085191769732 | 0.4500757466695785 |
| 0.8131236549393875 | 0.7667487757825059 | 0.0860913478166109 |
| 0.9199112378126523 | 0.6725985682120393 | 0.8232952408471668 |
| 0.6819478818949331 | 0.8331662228260284 | 0.8227269986269594 |
| 0.8725025452374128 | 0.7397813294512877 | 0.9947753125689786 |
| 0.7534425675666944 | 0.7719004941069808 | 0.9862313455223236 |
| 0.6957448823409760 | 0.7358397402466483 | 0.2290765656190451 |
| 0.6748456169707451 | 0.6967807817733381 | 0.2775109883758105 |
| 0.6821171851957314 | 0.7234348754880471 | 0.1515750433501379 |
| 0.6747128711481628 | 0.7848766024051281 | 0.2491688203245119 |
| 0.7502295695673694 | 0.7371554296693820 | 0.2357326494315615 |

**Figure S2 Ga/ZSM-5**

1.0000000000000000

20.0219993591000005 0.0000000000000000 0.0000000000000000

0.0000000000000000 19.8990001678000006 0.0000000000000000

0.0000000000000000 0.0000000000000000 13.3830003737999998

Ai O Al Ga H C

94 192 2 1 5 1

Direct

|                    |                    |                    |
|--------------------|--------------------|--------------------|
| 0.4216439610252512 | 0.0586670742349957 | 0.6502046827899562 |
| 0.3054918834103816 | 0.0298275430686049 | 0.7966910898782539 |
| 0.2809511484514134 | 0.0573921486753836 | 0.0189489139410436 |
| 0.1211284713211747 | 0.0636350700409118 | 0.0129168341459107 |
| 0.0661990718819203 | 0.0296614091883775 | 0.8005017265680764 |
| 0.1815797721106326 | 0.0605915197140168 | 0.6666381039847807 |
| 0.4205807727903511 | 0.8273898707478421 | 0.6736577681587742 |
| 0.3032160664388731 | 0.8708303773655647 | 0.8095277911347686 |
| 0.2667625269711001 | 0.8301006816110054 | 0.0279393855551539 |
| 0.1119933283972025 | 0.8270683590400665 | 0.0176470748662660 |
| 0.0633562581042486 | 0.8709017803150118 | 0.8029041914817359 |
| 0.1810991638697977 | 0.8271694663011122 | 0.6752989354283626 |
| 0.0768234727186215 | 0.9420258504563914 | 0.1531121586917094 |
| 0.1942491509859962 | 0.9702011299315061 | 0.2980340517444895 |
| 0.2179936334195422 | 0.9389612411855823 | 0.5202898597897249 |
| 0.3784344624713057 | 0.9332081734653034 | 0.5157942932593979 |
| 0.4338767768557897 | 0.9677263076984024 | 0.3041617756400457 |
| 0.3186784395993016 | 0.9381619775640935 | 0.1680564218581307 |
| 0.0810569594102655 | 0.1734679276082041 | 0.1668726560899160 |
| 0.1960821165181086 | 0.1297393941225542 | 0.3081352186811255 |

**Structure files (CONTCAR) involved in this work:**

|                    |                    |                    |
|--------------------|--------------------|--------------------|
| 0.2322106593621192 | 0.1703284548729870 | 0.5251208053440168 |
| 0.3870154930518744 | 0.1732422616161090 | 0.5107645484371358 |
| 0.4369328647424832 | 0.1262827979027058 | 0.2995336806528217 |
| 0.3180993511537151 | 0.1694391053341554 | 0.1733218764426675 |
| 0.5796757766860893 | 0.5572874537418057 | 0.3472506807116681 |
| 0.6917992216807126 | 0.5321901606780685 | 0.1900115464516649 |
| 0.7144030895598862 | 0.5650955602067745 | 0.9741818173761001 |
| 0.8723720020100492 | 0.5601543825162694 | 0.9741119963632616 |
| 0.9312644802541480 | 0.5292329089679301 | 0.1876419159670908 |
| 0.8152212267811987 | 0.5610406103610001 | 0.3200870407415184 |
| 0.5771306086622328 | 0.3286921741865861 | 0.3273783295746313 |
| 0.7034273136231121 | 0.3753570041975973 | 0.2082372874426573 |
| 0.7357404289741667 | 0.3292246113583281 | 0.9874708645775889 |
| 0.8875409508311446 | 0.3267585504072656 | 0.9752772056387056 |
| 0.9362931466691320 | 0.3712704911762763 | 0.1920025996151123 |
| 0.9252938586686311 | 0.4378022758926829 | 0.8347643981554415 |
| 0.7812099403071835 | 0.4412448804462987 | 0.4728578693074957 |
| 0.6206542361852524 | 0.4326232136290722 | 0.4863914141967308 |
| 0.5674869151504364 | 0.4675629780759428 | 0.7017148650992318 |
| 0.6737757056834598 | 0.4362865811946636 | 0.8493286644866299 |
| 0.9177743223550804 | 0.6729620172873284 | 0.8258415491276982 |
| 0.8007080620093168 | 0.6356873596333927 | 0.6924555762359159 |
| 0.7657504900947919 | 0.6654873359614807 | 0.4727794046129202 |
| 0.6109578487872623 | 0.6710880664431779 | 0.4855794390264064 |
| 0.5644540348108052 | 0.6259989167150417 | 0.7025295360203595 |
| 0.6821937966021401 | 0.6807899553435626 | 0.8229997875033165 |
| 0.5779459520727099 | 0.9428875364904750 | 0.3573713209961141 |
| 0.6956599782123327 | 0.9717903361982539 | 0.2127235709874721 |
| 0.7205423803370260 | 0.9443039122929899 | 0.9905665788521194 |
| 0.8800199408338722 | 0.9346098794925750 | 0.9934272784591764 |
| 0.9325978925885389 | 0.9701855555440256 | 0.2045341696622787 |
| 0.8194280177603599 | 0.9392023103307938 | 0.3466921219460875 |
| 0.5806856894698483 | 0.1739804271061424 | 0.3275435288201144 |
| 0.6974274273712140 | 0.1297289962241461 | 0.1918043271309266 |
| 0.7330898225529537 | 0.1709918390744593 | 0.9729224334104482 |
| 0.8879627052823738 | 0.1726640066718519 | 0.9855051151183130 |
| 0.9359450320086307 | 0.1287016927203326 | 0.1990432885104282 |
| 0.8185872603688901 | 0.1692915935027707 | 0.3299708813222990 |
| 0.9234368518648145 | 0.0551442908737158 | 0.8544856593493648 |
| 0.8046969019770666 | 0.0271990376918665 | 0.7099656869491693 |
| 0.7811875080849507 | 0.0575292397085523 | 0.4894504190704392 |
| 0.6208721717785604 | 0.0684499038132174 | 0.4888757082994439 |
| 0.5668203678166835 | 0.0339285486328929 | 0.6979883378152271 |
| 0.6803467388233174 | 0.0592754288300475 | 0.8424036596040061 |
| 0.9185148988968036 | 0.8257087436384101 | 0.8373818257837079 |
| 0.8038328789137840 | 0.8690116816447102 | 0.6933911122012368 |
| 0.7687402234094549 | 0.8258678161461643 | 0.4767993450390979 |
| 0.6139899259318546 | 0.8262289754573485 | 0.4928151052100923 |
| 0.5638533513714702 | 0.8770665008664787 | 0.6998544696655873 |
| 0.6805486880240860 | 0.8367478526149001 | 0.8303104977405550 |
| 0.4207842718580743 | 0.4420589288622704 | 0.6455405847425483 |
| 0.3090510142216564 | 0.4682655940008367 | 0.7972013864214522 |
| 0.2833917836872396 | 0.4402779347855860 | 0.0181508399675503 |

**Structure files (CONTCAR) involved in this work:**

|                    |                    |                    |
|--------------------|--------------------|--------------------|
| 0.1259663496356789 | 0.4348218815970657 | 0.0091621007431092 |
| 0.0727136207171042 | 0.4717441847600104 | 0.8008594072085564 |
| 0.1869797739105338 | 0.4425675911067928 | 0.6630806885424475 |
| 0.4222944219902084 | 0.6732299241493854 | 0.6715468655194786 |
| 0.3038524269002981 | 0.6267383414847449 | 0.8038957825804255 |
| 0.2667040748693893 | 0.6696975022225277 | 0.0224630195581074 |
| 0.1122797922839679 | 0.6737397402150338 | 0.0128230750023106 |
| 0.0642487494948984 | 0.6291589076573399 | 0.8025227225478921 |
| 0.1807065771446595 | 0.6690532696571149 | 0.6696904876109894 |
| 0.0762330261134577 | 0.5557232808536547 | 0.1439195454245663 |
| 0.1938822921773298 | 0.5281045420780878 | 0.2907789633686009 |
| 0.2200044109724336 | 0.5630486005601066 | 0.5107542978114499 |
| 0.3801344061515436 | 0.5697713285173353 | 0.5098237968190679 |
| 0.4350512712358675 | 0.5305919187927595 | 0.3004715604515319 |
| 0.3206313270114753 | 0.5601629904169567 | 0.1635305676056940 |
| 0.0830769020543423 | 0.3271384524981962 | 0.1616794420474303 |
| 0.1951552803379172 | 0.3686174228830898 | 0.3074997974588554 |
| 0.2320311691594117 | 0.3303968211895970 | 0.5250975100912045 |
| 0.3865266217476095 | 0.3272614840983160 | 0.5085731167746984 |
| 0.4334309034862009 | 0.3730814802160681 | 0.2958368707804682 |
| 0.3157060990396081 | 0.3270569288692497 | 0.1716024070215440 |
| 0.3573032017758546 | 0.0677648225752515 | 0.7227417987831845 |
| 0.3157546115520914 | 0.0573592354138167 | 0.9094667073666967 |
| 0.2007214206002980 | 0.0495098830906918 | 0.0086986025732748 |
| 0.0907765441298851 | 0.0676676245990612 | 0.9011655898457001 |
| 0.1046374582839241 | 0.0606663176127026 | 0.7042253677392130 |
| 0.2291894203816083 | 0.0454149429701996 | 0.7625470720666934 |
| 0.3605132365104143 | 0.8266082341553874 | 0.7551102639645397 |
| 0.3053132321162671 | 0.8549562646902383 | 0.9279672667356348 |
| 0.1889510851074727 | 0.8534273788589973 | 0.0217416096562645 |
| 0.0851533736098166 | 0.8317264777705287 | 0.9039263788421056 |
| 0.1035779575018372 | 0.8383114976406262 | 0.7086855460124878 |
| 0.2295285216806166 | 0.8518131733241171 | 0.7662828618979197 |
| 0.3194435114978003 | 0.9495339658189319 | 0.7893252480928555 |
| 0.0823940186831459 | 0.9499205351369818 | 0.8117423989511181 |
| 0.4312877227028173 | 0.1268895619981973 | 0.5850372615699313 |
| 0.4129377636593543 | 0.9952475966487960 | 0.5750309263828415 |
| 0.3954567777836582 | 0.8626022267523230 | 0.5708380611915327 |
| 0.1989140405106420 | 0.1340110354224875 | 0.6211697117183219 |
| 0.1906654453951763 | 0.0032163242279465 | 0.5820551523449027 |
| 0.1967539505207573 | 0.8690261679389955 | 0.5739553038950018 |
| 0.9871062229688748 | 0.0425834296187220 | 0.7817890270231423 |
| 0.9833568909741768 | 0.8620112502382331 | 0.7868288977150916 |
| 0.1418971449728796 | 0.9330736458295310 | 0.2241207791675012 |
| 0.1845242552173560 | 0.9407645379092267 | 0.4099500667665384 |
| 0.2984398459207638 | 0.9444856476932194 | 0.5123788945678868 |
| 0.4080507674915976 | 0.9289521017255609 | 0.4036285628711432 |
| 0.3953840198905750 | 0.9386116011892384 | 0.2066269257901184 |
| 0.2704053448573770 | 0.9552516018523121 | 0.2625664813838199 |
| 0.1407845791480485 | 0.1735070876827186 | 0.2488377011618704 |
| 0.1914099663233436 | 0.1487177659374656 | 0.4255156368388073 |
| 0.3097980590604696 | 0.1472672013252922 | 0.5130719993626641 |
| 0.4157464372933388 | 0.1688667127562679 | 0.3980043552679461 |

**Structure files (CONTCAR) involved in this work:**

|                    |                    |                    |
|--------------------|--------------------|--------------------|
| 0.3955589621142965 | 0.1553562891095077 | 0.2039609717464563 |
| 0.2707057788427941 | 0.1472383516060459 | 0.2669810295118152 |
| 0.1798984032231147 | 0.0505170255169180 | 0.2928251878369303 |
| 0.4187978022508503 | 0.0476241964821612 | 0.3169310381689466 |
| 0.0660797907387857 | 0.8726165037205296 | 0.0909270124662000 |
| 0.0853852481684144 | 0.0032779972930371 | 0.0741001271091858 |
| 0.1057284563889064 | 0.1349071375108324 | 0.0665804052706468 |
| 0.3018425786186422 | 0.8639243046007411 | 0.1247074198858640 |
| 0.3098038425324103 | 0.9939768852066329 | 0.0810158053307313 |
| 0.2990671072838668 | 0.1276634401645909 | 0.0734847704411701 |
| 0.5128592517234181 | 0.9536544361838220 | 0.2868554119519900 |
| 0.5165217405299262 | 0.1349628618733908 | 0.2794867390591566 |
| 0.6429399101140497 | 0.5651457395760406 | 0.2731716013068547 |
| 0.6791288191602913 | 0.5692710417674055 | 0.0836429314857027 |
| 0.7932138442758758 | 0.5476971216945840 | 0.9893110443893345 |
| 0.9103286633788810 | 0.5623691815819641 | 0.0809968854544827 |
| 0.8918454223984026 | 0.5633666733228528 | 0.2813214232705093 |
| 0.7684682007134790 | 0.5470290520773086 | 0.2238535254138872 |
| 0.6390425685830877 | 0.3346222324470349 | 0.2510208761968025 |
| 0.7258389554122130 | 0.3363911514710882 | 0.1068383878098139 |
| 0.8114173604693581 | 0.3543707946808922 | 0.9592124999803943 |
| 0.9115187628819125 | 0.3342423985376018 | 0.0895619724559941 |
| 0.9039846114249682 | 0.3373247172726694 | 0.2886179603046977 |
| 0.7635726404504696 | 0.3766163222830214 | 0.2879324825964540 |
| 0.6792345876445464 | 0.4518373191688650 | 0.1808375224260625 |
| 0.9144739705516959 | 0.4499697720924441 | 0.1828119490785299 |
| 0.5673008130593510 | 0.6277266455746807 | 0.4059243007754145 |
| 0.5926739409958360 | 0.4988774537464801 | 0.4301494555512311 |
| 0.5936464661839528 | 0.3648481883196009 | 0.4338522188780838 |
| 0.7979033537814451 | 0.6317163967463391 | 0.3735664825111953 |
| 0.8059436446873814 | 0.5010826091471566 | 0.4021551729864866 |
| 0.8278071350736785 | 0.3723672930032146 | 0.4634116350671478 |
| 0.0098270062568551 | 0.5432890425387970 | 0.2106469537749517 |
| 0.0177271803011677 | 0.3684578581437058 | 0.1975262391897323 |
| 0.8716104594460512 | 0.4269007052143373 | 0.7415107401553364 |
| 0.8114602096625294 | 0.4577175360252291 | 0.5874236329373149 |
| 0.7021627973251116 | 0.4330351535135630 | 0.4812383444937505 |
| 0.5971923580046703 | 0.4322762595269007 | 0.6015302557432491 |
| 0.5994419470813136 | 0.4323387834298758 | 0.7998336290447392 |
| 0.7295644407770796 | 0.4341771893659589 | 0.7625830336778389 |
| 0.8638424646679534 | 0.6781927426429313 | 0.7357991833489239 |
| 0.8054324709990855 | 0.6380117689131922 | 0.5707231687963986 |
| 0.6876575795124172 | 0.6435482014554705 | 0.4831039438762236 |
| 0.5810350928116441 | 0.6624087043926561 | 0.5970190249694199 |
| 0.6057660934445167 | 0.6617889236968577 | 0.7924533225757465 |
| 0.7302189959449252 | 0.6708840941668700 | 0.7254057505097000 |
| 0.8040954710512795 | 0.5603602530616394 | 0.7358165063158766 |
| 0.5855896447679109 | 0.5472833079026608 | 0.6970501285871559 |
| 0.9350094722452559 | 0.3696659236556076 | 0.8991450607071612 |
| 0.9002267134422269 | 0.4982994547861385 | 0.9056859499868098 |
| 0.8872473560418510 | 0.6312421932628111 | 0.9196220054741924 |
| 0.6817117988612826 | 0.3735533919347985 | 0.9263957186916993 |
| 0.6780462399298154 | 0.5066847890123296 | 0.9107637269592863 |

**Structure files (CONTCAR) involved in this work:**

|                    |                    |                    |
|--------------------|--------------------|--------------------|
| 0.7069745500576055 | 0.6365211789326068 | 0.9175379739569710 |
| 0.4874058736168664 | 0.4576948288626610 | 0.7093821767613722 |
| 0.4847643844513639 | 0.6342066193167660 | 0.7241332018805197 |
| 0.6432779669832016 | 0.9347834561195059 | 0.2867920713911674 |
| 0.6912817282253025 | 0.9374386240432582 | 0.1030318261677948 |
| 0.8011634065636286 | 0.9530853559883060 | 0.9913150984679439 |
| 0.9060518601210605 | 0.9285682199230356 | 0.1076557273391510 |
| 0.8954822095494014 | 0.9442188902660728 | 0.3053396180171892 |
| 0.7709247733578254 | 0.9622210692551512 | 0.2554133142956008 |
| 0.6412656993708665 | 0.1747924989948259 | 0.2474981727118491 |
| 0.6949213512375113 | 0.1482622381783593 | 0.0741109416698584 |
| 0.8108039013704740 | 0.1472015883275690 | 0.9806803046498379 |
| 0.9143929093991314 | 0.1704170949875267 | 0.0996703333482094 |
| 0.8962703129143909 | 0.1581429703143434 | 0.2949682974225847 |
| 0.7712876545371303 | 0.1441844921567805 | 0.2367955383826068 |
| 0.6775397121480680 | 0.0511413306428750 | 0.2073459281121151 |
| 0.9184968562941676 | 0.0494787740671851 | 0.1841088045827416 |
| 0.5687478956574588 | 0.8743277061970971 | 0.4220680878839564 |
| 0.5834369053116006 | 0.0062964292357460 | 0.4335095791922340 |
| 0.6045648096985790 | 0.1380334529122924 | 0.4306249224465099 |
| 0.8036099457805650 | 0.8624487883368009 | 0.3815067087950761 |
| 0.8099625768767125 | 0.9877904020037579 | 0.4430764054386491 |
| 0.8057960107619283 | 0.1217528150682112 | 0.4268679703260827 |
| 0.0117592505586764 | 0.9561675747163447 | 0.2219830460971180 |
| 0.0160136664243570 | 0.1375152102590823 | 0.2162782504426139 |
| 0.8566311833198943 | 0.0620282193064215 | 0.7869427175505785 |
| 0.8097516851006558 | 0.0646535478208987 | 0.6027157849844658 |
| 0.7002542991964668 | 0.0533935788060445 | 0.4898088946466495 |
| 0.5933586198763269 | 0.0767322726387874 | 0.6023479211900128 |
| 0.6045737159219677 | 0.0568513812578876 | 0.7997640382547244 |
| 0.7291209195286605 | 0.0347393610729356 | 0.7523547152154157 |
| 0.8576524541196364 | 0.8268181923342770 | 0.7578665330863072 |
| 0.8086899731229877 | 0.8444973340761618 | 0.5784623100728408 |
| 0.6915127273127515 | 0.8508130967599039 | 0.4873041127361851 |
| 0.5874438355750832 | 0.8297383680892888 | 0.6073297256693987 |
| 0.6039875756841177 | 0.8553261711597542 | 0.8003309499628390 |
| 0.7287789825588669 | 0.8559780337514258 | 0.7361926257128335 |
| 0.8228979405662012 | 0.9480812777101556 | 0.7003914419195851 |
| 0.5801669343736450 | 0.9549314382228274 | 0.6732716539796080 |
| 0.9340225223241670 | 0.1249894929911340 | 0.9152762702916308 |
| 0.9198021078935924 | 0.9937083863946923 | 0.9344351268127710 |
| 0.8954302794035056 | 0.8630402337303136 | 0.9397523941278969 |
| 0.6981800112392740 | 0.1354208289632293 | 0.8768210814951294 |
| 0.6871694047508049 | 0.0098400346190334 | 0.9384488765667570 |
| 0.7017764599493044 | 0.8766879877409521 | 0.9303129531545206 |
| 0.4879067357576193 | 0.0475100116198593 | 0.7177126252776407 |
| 0.4843203961064554 | 0.8674964823433384 | 0.7200111616907442 |
| 0.3593082899071126 | 0.4291455509984787 | 0.7223305491304989 |
| 0.3179614735873945 | 0.4378535010930271 | 0.9085730230073958 |
| 0.2041051728762814 | 0.4560155990581703 | 0.0081732854791338 |
| 0.0986545228342710 | 0.4280128800092394 | 0.8952794822487767 |
| 0.1095903795643951 | 0.4497673179858594 | 0.6979127163946487 |
| 0.2323813538501828 | 0.4561639185645910 | 0.7615237239771530 |

**Structure files (CONTCAR) involved in this work:**

|                    |                    |                    |
|--------------------|--------------------|--------------------|
| 0.3586554621462090 | 0.6719816319160861 | 0.7463591355125542 |
| 0.3040927465679677 | 0.6484134469210394 | 0.9200489673496320 |
| 0.1889057249269126 | 0.6464283385456843 | 0.0158930132791098 |
| 0.0858093323509938 | 0.6739182186211216 | 0.8982987443563754 |
| 0.1037180932705207 | 0.6561829617662011 | 0.7042477334914786 |
| 0.2299904225712195 | 0.6389459168731523 | 0.7559927107490817 |
| 0.3251694153277175 | 0.5482726526092038 | 0.7935238544692708 |
| 0.0837299605924811 | 0.5510343846413149 | 0.8240327853627448 |
| 0.4325824510492337 | 0.3747194276312591 | 0.5791790542536797 |
| 0.4046655163507034 | 0.5045196685424100 | 0.5719053872281180 |
| 0.4024500967274485 | 0.6380940203804121 | 0.5662708013034836 |
| 0.1986587618882995 | 0.3670555137741106 | 0.6212549667188452 |
| 0.2028003140392350 | 0.4965492094127483 | 0.5758931969094315 |
| 0.1927686851974467 | 0.6307408538637701 | 0.5642789043374370 |
| 0.9944513260128331 | 0.4563463096786631 | 0.7793774706497526 |
| 0.9844980781135249 | 0.6355442979527609 | 0.7829747265798711 |
| 0.1404882975660006 | 0.5639087349496638 | 0.2168868225044786 |
| 0.1831624129370137 | 0.5566910147178101 | 0.4031503986586585 |
| 0.2999182742238409 | 0.5676775104579339 | 0.4965041250531340 |
| 0.4149770199264997 | 0.5708150702643895 | 0.4012047917524257 |
| 0.3963188136936485 | 0.5635248409272325 | 0.2060261813798844 |
| 0.2697369939507095 | 0.5444148742038737 | 0.2555042381073044 |
| 0.1376223630614524 | 0.3258999650932330 | 0.2515308093851747 |
| 0.1907646097015180 | 0.3526796976946877 | 0.4259967304368091 |
| 0.3095307293821203 | 0.3538378408792210 | 0.5136608871804287 |
| 0.4125188277539868 | 0.3302726945630559 | 0.3942293976422580 |
| 0.3928909753126925 | 0.3440328256085739 | 0.1997772026268575 |
| 0.2689349394410609 | 0.3479021930766027 | 0.2666515843457057 |
| 0.1810876608582769 | 0.4476715944984261 | 0.2868806893072820 |
| 0.4147106348175190 | 0.4518001227565674 | 0.3131898133966438 |
| 0.0663177927252001 | 0.6249118885748183 | 0.0810557431460611 |
| 0.0843383107678689 | 0.4932505092338848 | 0.0664459234747481 |
| 0.1157370161086207 | 0.3626075519053371 | 0.0632456111149882 |
| 0.3026831235393793 | 0.6325212888072119 | 0.1154023852566920 |
| 0.3174364773513524 | 0.5008305784932889 | 0.0806606579203978 |
| 0.2942196659144820 | 0.3683044930839322 | 0.0721761647925829 |
| 0.5146070949725211 | 0.5385234682612074 | 0.2807357079800996 |
| 0.5127540204410024 | 0.3645881774016685 | 0.2752547535290970 |
| 0.4418691478986502 | 0.7506646394575293 | 0.6484517824189240 |
| 0.1944589973411761 | 0.7483122956360878 | 0.6521531229667445 |
| 0.2722529133358414 | 0.7496220573455414 | 0.0399375708872166 |
| 0.1077725281173907 | 0.7497249640522280 | 0.0557516130639819 |
| 0.0636673187120780 | 0.2501620148215803 | 0.1346188519570698 |
| 0.3068814212360608 | 0.2480454877452970 | 0.1471152104158490 |
| 0.2268633620637288 | 0.2504417587338722 | 0.5427495238983108 |
| 0.3914193926763312 | 0.2505707039301031 | 0.5486918164534519 |
| 0.5601761052532667 | 0.2509253512326113 | 0.3525123093197418 |
| 0.8039800112014438 | 0.2453713178614001 | 0.3606121140166978 |
| 0.7274186089513959 | 0.2511709861298840 | 0.9555855635393419 |
| 0.8932249631585901 | 0.2486417233996711 | 0.9422742122983258 |
| 0.9363549110748449 | 0.7480918903830286 | 0.8643428577336743 |
| 0.6861367739045361 | 0.7581455667598518 | 0.8583994440711940 |
| 0.7723064690828436 | 0.7457098389322854 | 0.4591680305925386 |



**Structure files (CONTCAR) involved in this work:**

0.6075015636568361 0.7494597057492804 0.4532986138959242  
0.8262757319151188 0.3277414256195993 0.3427117472928815  
0.7970682696663455 0.4761683332421532 0.7174984300689441  
0.8800300397394448 0.3897708884591015 0.5961545685243042  
0.9336166758987449 0.3345569708654452 0.6013414625269530  
0.9941175540061804 0.5206307577969498 0.5995031717540009  
0.0085958912889912 0.4382480033200579 0.5506350302217264  
0.9311855377077383 0.4845791687469035 0.5219035918186492  
0.0073628075166629 0.5084860496017034 0.4672030445462941  
0.9856664197006042 0.4873019710182829 0.5356293128448492

**Figure S2 Mn/ZSM-5**

1.0000000000000000

20.0219993591000005 0.0000000000000000 0.0000000000000000  
0.0000000000000000 19.8990001678000006 0.0000000000000000  
0.0000000000000000 0.0000000000000000 13.3830003737999998

Si O Al C Mo H  
94 192 2 3 4 4

**Direct**

0.4239043626053421 0.0579908216867701 0.6527901709167947  
0.3062793369456823 0.0298234317947015 0.7976920852222276  
0.2814952308730211 0.0586405987569553 0.0207545826430933  
0.1212920290990496 0.0659585698346991 0.0173621558799643  
0.0667298634628135 0.0313164104414076 0.8063049202972341  
0.1809426750203568 0.0627466827394343 0.6700048988923948  
0.4179149000880785 0.8276931544266470 0.6705881427805367  
0.3050042041125872 0.8706082864341645 0.8115708695724132  
0.2702808409733078 0.8310844586852539 0.0299682634281093  
0.1160140210155828 0.8266509603295590 0.0168136047550307  
0.0689731240008349 0.8737761007602780 0.8047315191034101  
0.1847626292582735 0.8296754011307593 0.6748231857409323  
0.0789939132473668 0.9405725997879381 0.1531143836937449  
0.1947164635772783 0.9693195388009116 0.2988093140878752  
0.2191543141929883 0.9433683193362395 0.5212893102494620  
0.3777922283362129 0.9355997052927212 0.5156594882996456  
0.4349171447065507 0.9691262207694700 0.3057460221880995  
0.3193586540087646 0.9388342220816938 0.1708208990352017  
0.0798211236263849 0.1729517417365386 0.1749711617772883  
0.1970008275309307 0.1279067066499949 0.3086653672346301  
0.2329354421631129 0.1686091206170659 0.5260032789931759  
0.3876374865955475 0.1729069040065340 0.5159252205565763  
0.4368829132587753 0.1275056456738249 0.3040013833806589  
0.3194424462836958 0.1706540856798906 0.1744110473514423  
0.5771749304805047 0.5583513564733253 0.3537559163196136  
0.6908034791700202 0.5264280441057989 0.2061766625221813  
0.7141497781419320 0.5578475753147243 0.9843837645199481  
0.8732202366694651 0.5679501560762522 0.9850474361556072  
0.9322444848416503 0.5351114713439431 0.1926114705291338  
0.8159494494116639 0.5582099929271873 0.3310875289493148  
0.5815847951424030 0.3258941313302438 0.3338742263606496  
0.6946589121310482 0.3697435827735719 0.1945393101874356  
0.7319578905413159 0.3296255749853644 0.9779344514072719  
0.8870020815747691 0.3275558729345229 0.9884005089237793  
0.9356679402291639 0.3770138280285267 0.1977840326687180

**Structure files (CONTCAR) involved in this work:**

0.8183979831082098 0.3328585791551657 0.3264910502627785  
0.9201469700619850 0.4430972707708909 0.8512219197978329  
0.8036319016805377 0.4675581489196047 0.7055787700912901  
0.7803622030107019 0.4415838067844576 0.4838569604837298  
0.6209289377453994 0.4357134604967676 0.4902121253822953  
0.5652799431412487 0.4680151086125030 0.7015996103517275  
0.6804298472196874 0.4356245129659622 0.8356100777551524  
0.9205986604616866 0.6734516049507693 0.8292000106996513  
0.7640629239615880 0.6696662664310193 0.4670599544842887  
0.6112449216912669 0.6724112028965153 0.4914067511351917  
0.5603108392066943 0.6266198242278896 0.7032271598935786  
0.6747099205459840 0.6740132626594012 0.8349184611027275  
0.5792015157507708 0.9422085972483187 0.3543228177062830  
0.6939832216144940 0.9756203049346764 0.2078110335194606  
0.7168971229547760 0.9422875875746929 0.9857024704212288  
0.8763737077393483 0.9318995578385108 0.9881684491561310  
0.9344732673533969 0.9664484002655707 0.1984334298738955  
0.8178626170304796 0.9411144620299977 0.3325080038337053  
0.5815961831577262 0.1739004602975327 0.3327911171622697  
0.6960446080586133 0.1327224244063700 0.1939592587331531  
0.7328578269306136 0.1686023243127503 0.9775127280292223  
0.8878381462678434 0.1723421294191565 0.9886932885182954  
0.9363134909883236 0.1253083660490815 0.2015640392797882  
0.8180707208371086 0.1741748592202829 0.3241200646945754  
0.9196204454843093 0.0576787941840113 0.8502241452298103  
0.8062551390945318 0.0348707466139187 0.6981832082721134  
0.7820777042346200 0.0619321251881575 0.4789884530667946  
0.6233498721224754 0.0651518354678017 0.4894326155036411  
0.5688666125975421 0.0319790592937020 0.7001337935607435  
0.6854663287017938 0.0632546783074801 0.8315752428494052  
0.9230757073569132 0.8268339316167530 0.8301589970045475  
0.7654971126880404 0.8277198494624151 0.4704414584183554  
0.6129896690490130 0.8267542426678801 0.4923494011062345  
0.5621123527832640 0.8745281711534424 0.7012544017708241  
0.6733471498330356 0.8290877959784130 0.8385963672514745  
0.4213210556562708 0.4426374969705114 0.6490424045647804  
0.3033380391382232 0.4693360508871839 0.7943504936011616  
0.2806917461785250 0.4390269975388688 0.0170308141138917  
0.1200699860065514 0.4329472918642654 0.0131058301611356  
0.0664439794201729 0.4694312466021270 0.7989654135188436  
0.1797600712704071 0.4366902286100545 0.6643801549074450  
0.4176446289590084 0.6736397276570066 0.6667825205838325  
0.3005177899791435 0.6291949826373400 0.8050079635357953  
0.2717238681278841 0.6704463649558894 0.0253955433684626  
0.1179531272918576 0.6722773501883084 0.0128273589889568  
0.0673446922825865 0.6268012771165322 0.8023208133769113  
0.1809980840622010 0.6720894581887910 0.6715623115314812  
0.0777588899171797 0.5585854975846707 0.1489732484061039  
0.1948246638623104 0.5317412026293242 0.2942652460114816  
0.2175316146589668 0.5582216042331288 0.5184719400277050  
0.3781749381085786 0.5662985490997798 0.5116977162144029  
0.4337575150856318 0.5287877336879966 0.3017202750944191  
0.3198228578396972 0.5603056108488053 0.1636084689169911

**Structure files (CONTCAR) involved in this work:**

0.0786127040542862 0.3273832744933796 0.1695848344830212  
0.1973259809720440 0.3721507010740030 0.3048948900041175  
0.2323670936175675 0.3296555879673112 0.5217908699829974  
0.3871895872131889 0.3263623372308181 0.5130527561964709  
0.4374146011907854 0.3707955916667530 0.3019619120401660  
0.3199546396676478 0.3284708964608043 0.1723939847974821  
0.3594612727496949 0.0671936975650855 0.7254002263025922  
0.3163763620244756 0.0556961518580049 0.9114365711764412  
0.2010535880247720 0.0540873057172486 0.0102421746631243  
0.0893864626932526 0.0708497743919123 0.9067323667025654  
0.1045353631375802 0.0634282949175569 0.7101401332635383  
0.2302942863270614 0.0470758867663773 0.7637574250134025  
0.3612428979863841 0.8254442904108622 0.7573637838694343  
0.3084314016278268 0.8572112652098760 0.9305073645099302  
0.1923106449094051 0.8541175006143162 0.0246455877015828  
0.0913132725323294 0.8309201077524953 0.9021116514841798  
0.1077072761669564 0.8425157519480549 0.7080846305755223  
0.2315660839082719 0.8484480785089168 0.7701136402071849  
0.3185662675180927 0.9492695523124907 0.7878425187276962  
0.0880361924390178 0.9524516099146687 0.8183157144082471  
0.4334521293492078 0.1263896348362345 0.5878433965536531  
0.4152360582646851 0.9948246798955718 0.5770266164043274  
0.3877366859561605 0.8636586689421148 0.5710961005000023  
0.1979437731723818 0.1362016089423459 0.6239632018381079  
0.1884219810078965 0.0048303047126566 0.5855069259201603  
0.2045055389862203 0.8719778300766902 0.5761411520952794  
0.9871592601544196 0.0391619499552614 0.7883786393227731  
0.9895535858758235 0.8652359888371686 0.7887284967182407  
0.1429283646493652 0.9301119388744165 0.2259858058556473  
0.1834396555110944 0.9433619689227571 0.4123721732747718  
0.2989149027497919 0.9538473609608759 0.5087901925157685  
0.4095136830128616 0.9293709272192744 0.4048036153302715  
0.3961946469335266 0.9414582489880291 0.2075854940301829  
0.2711401414783216 0.9529624358557919 0.2664768620996809  
0.1399177697836619 0.1735307120432558 0.2563697849940544  
0.1945767581156078 0.1406801680757671 0.4277889345075891  
0.3108596132962337 0.1458916509364467 0.5203916803440448  
0.4144512569222363 0.1698098462893406 0.4019895846182562  
0.3964082568816887 0.1566540918090629 0.2076352625760783  
0.2705108026467216 0.1478870585491517 0.2660181816425473  
0.1806803695833466 0.0493525905747081 0.2861430506482968  
0.4191457103687125 0.0487207694357874 0.3208841407820024  
0.0687058372378267 0.8717822503941778 0.0888791178714090  
0.0876108411689059 0.0035169884013935 0.0772979702990381  
0.1049589249935283 0.1362316148865359 0.0733649698570236  
0.3050756816149783 0.8641242119120592 0.1272254037120268  
0.3071777872042980 0.9947459436181494 0.0848956797018257  
0.3023725746945899 0.1287879706635373 0.0736726581490061  
0.5135703412026809 0.9551873667140292 0.2857472101329416  
0.5165158313717506 0.1362915710229418 0.2854686756708137  
0.6427157555419603 0.5666104256891999 0.2834209735859586  
0.6789534113039464 0.5540871627470317 0.0939324465190673  
0.7945093425327064 0.5545969638840428 0.9994929550145095

**Structure files (CONTCAR) involved in this work:**

|                    |                    |                    |
|--------------------|--------------------|--------------------|
| 0.9088464920668293 | 0.5764122186515610 | 0.0935583186449126 |
| 0.8922472806104054 | 0.5609055001197258 | 0.2906277553368131 |
| 0.7686360918735587 | 0.5365872810012049 | 0.2375908699655047 |
| 0.6413550734392593 | 0.3225336553812231 | 0.2522408578964139 |
| 0.6917604600115236 | 0.3548187932516701 | 0.0761861197209826 |
| 0.8098119550125782 | 0.3536300841851128 | 0.9839353210688676 |
| 0.9137929815651352 | 0.3313676713326508 | 0.1027711558355517 |
| 0.8947681331382188 | 0.3528692465348446 | 0.2965091695908029 |
| 0.7701494992230451 | 0.3543262963986690 | 0.2335842056244526 |
| 0.6729141872282649 | 0.4470067496112724 | 0.2157097465614136 |
| 0.9195803099639462 | 0.4553234549040339 | 0.1734413305675886 |
| 0.5660758625720957 | 0.6277226732630290 | 0.4155599368195458 |
| 0.5834851745881555 | 0.4967281597350816 | 0.4326000169985691 |
| 0.6063292148234056 | 0.3652941876811114 | 0.4332648038292495 |
| 0.7945622014275882 | 0.6324021319991268 | 0.3694480661791097 |
| 0.8110763957472094 | 0.5046965742372616 | 0.4220225917100363 |
| 0.7963289947035511 | 0.3713245811113539 | 0.4275630294049866 |
| 0.0108103599403690 | 0.5492385867170172 | 0.2150902427947482 |
| 0.0152364513180596 | 0.3667915154393799 | 0.2185388222907761 |
| 0.8576117925320841 | 0.4296014215492100 | 0.7776140282991242 |
| 0.8148613260506984 | 0.4388077430807610 | 0.5928300366581618 |
| 0.7001500033852429 | 0.4517817384685731 | 0.4928964445257239 |
| 0.5908848206372321 | 0.4290606095523579 | 0.6020264160940078 |
| 0.6030977138879009 | 0.4385820141296931 | 0.7992598144424106 |
| 0.7280173086221975 | 0.4468791666765848 | 0.7391206437715112 |
| 0.8723522462351674 | 0.6722217933304541 | 0.7305662944690575 |
| 0.8097045621029373 | 0.6527369686471364 | 0.5646457137783022 |
| 0.6879986990209535 | 0.6444663361246680 | 0.4896810724131178 |
| 0.5815536787191904 | 0.6679179300964693 | 0.6034920819202643 |
| 0.5978546845854116 | 0.6570067410012119 | 0.8001832875005354 |
| 0.7255583878991141 | 0.6615704763009812 | 0.7437814913321718 |
| 0.8132836058473336 | 0.5469399729460442 | 0.7133760595325751 |
| 0.5794854917767441 | 0.5479171122813611 | 0.6880026972697491 |
| 0.9327574727050485 | 0.3750225195498207 | 0.9166812425731370 |
| 0.9079480526038575 | 0.5057049675428956 | 0.9269295393528824 |
| 0.8835285636929721 | 0.6375908470591179 | 0.9226740725768587 |
| 0.6954984094939283 | 0.3615839456157387 | 0.8812130079002468 |
| 0.6918481889691476 | 0.4925333865308539 | 0.9204562145009635 |
| 0.6921695838863354 | 0.6270348153082270 | 0.9313928027882642 |
| 0.4859870953990061 | 0.4545082075345983 | 0.7193129911994054 |
| 0.4796718962405904 | 0.6343463302139483 | 0.7190845177686771 |
| 0.6442210989725988 | 0.9351203036694925 | 0.2823488356353608 |
| 0.6804483831683623 | 0.9547032484115439 | 0.0929427822773814 |
| 0.7967468502801982 | 0.9363310819819000 | 0.0042346089708996 |
| 0.9132723650973702 | 0.9285228524881747 | 0.0961670091239168 |
| 0.8947734358996524 | 0.9339958696350947 | 0.2933686179363186 |
| 0.7712323816488433 | 0.9586561802852182 | 0.2366104085781966 |
| 0.6391067313038774 | 0.1778442919341630 | 0.2474806823817900 |
| 0.6916078282138951 | 0.1412900074850125 | 0.0740261534022828 |
| 0.8108583884214589 | 0.1456428593976815 | 0.9864922308589300 |
| 0.9165347472898340 | 0.1670645155510992 | 0.1018584149453678 |
| 0.8949256372318340 | 0.1548517716587866 | 0.2963295569524610 |
| 0.7705166715919815 | 0.1560135538118749 | 0.2288164704899318 |

**Structure files (CONTCAR) involved in this work:**

|                    |                     |                    |
|--------------------|---------------------|--------------------|
| 0.6813417438557066 | 0.0553584601945906  | 0.2256629197637610 |
| 0.9185659734857121 | 0.0460889015701896  | 0.1874659834830653 |
| 0.5693779840836818 | 0.8727291737291070  | 0.4163099814494589 |
| 0.5853183520473109 | 0.0039291261763387  | 0.4330758445206028 |
| 0.6090551637822581 | 0.1351904120307411  | 0.4312184874451837 |
| 0.7969851894238096 | 0.8683696331422187  | 0.3766740224758419 |
| 0.8141476686144551 | -0.0005369459914996 | 0.4165298979645681 |
| 0.7941592465455370 | 0.1326332879883575  | 0.4216181215843117 |
| 0.0130805427849428 | 0.9525435041775330  | 0.2215615809781794 |
| 0.0158916661090483 | 0.1338221435563840  | 0.2228281569299153 |
| 0.8592088048378164 | 0.0717651580864206  | 0.7730445369783423 |
| 0.8181975137148498 | 0.0661104268315944  | 0.5867861721928053 |
| 0.7025536358048216 | 0.0485353047157954  | 0.4909794970596715 |
| 0.5942150255311939 | 0.0728220108606284  | 0.6018376001847633 |
| 0.6073877418764553 | 0.0576621552044710  | 0.7996371344259126 |
| 0.7304043209356157 | 0.0550176139529117  | 0.7316609610604310 |
| 0.8701438062110588 | 0.8293249560654302  | 0.7393545872390860 |
| 0.8105103437807374 | 0.8420629231855860  | 0.5704813044149853 |
| 0.6900127997711213 | 0.8539987721195814  | 0.4927723444400549 |
| 0.5838144353461584 | 0.8302467947763064  | 0.6046846807929511 |
| 0.5968512442366311 | 0.8454972003961216  | 0.8014795756452867 |
| 0.7247178505248840 | 0.8459577840947052  | 0.7498530679540266 |
| 0.8158045739918299 | 0.9554065483699201  | 0.7010048869285358 |
| 0.5826565763842252 | 0.9524134392731811  | 0.6816325240245453 |
| 0.9328122563622183 | 0.1257756350768311  | 0.9150703670070400 |
| 0.9033178982350863 | 0.9963651535150588  | 0.9265294609716321 |
| 0.8949086398350354 | 0.8626705951961529  | 0.9304011628961093 |
| 0.6986060448617951 | 0.1372469754031432  | 0.8786624653386956 |
| 0.7032986774299561 | 0.0061787356697640  | 0.9137133123550251 |
| 0.6878461412348533 | 0.8737044512998184  | 0.9386705843179542 |
| 0.4899952366940834 | 0.0462400163904152  | 0.7201605354448639 |
| 0.4813922772550189 | 0.8690659669923404  | 0.7137318309481199 |
| 0.3556262167483534 | 0.4335437064118063  | 0.7190672238738242 |
| 0.3141858175671591 | 0.4410487690092880  | 0.9066152108993735 |
| 0.2001656421661244 | 0.4423735997476089  | 0.0090656942351151 |
| 0.0904909569558262 | 0.4329953346842599  | 0.9008221793858876 |
| 0.1027849766774337 | 0.4357263054399086  | 0.7026580435712465 |
| 0.2272603415541853 | 0.4528752208074583  | 0.7600395716901228 |
| 0.3533834591359636 | 0.6728711225485332  | 0.7413693390347234 |
| 0.3072894568731827 | 0.6487526296481420  | 0.9214635641634785 |
| 0.1942530370010429 | 0.6453165133131783  | 0.0232518656705566 |
| 0.0969532463109808 | 0.6688320199184271  | 0.8953775214508264 |
| 0.0989272198387885 | 0.6638976680309585  | 0.6987890468949719 |
| 0.2242773775237438 | 0.6468818419513352  | 0.7667060892289747 |
| 0.3152923341659872 | 0.5500853849682308  | 0.7888940993761125 |
| 0.0896349242004422 | 0.5487582285298575  | 0.8030216372626987 |
| 0.4318784680804106 | 0.3742981206692292  | 0.5844972058268161 |
| 0.4136827002319783 | 0.5056493741219705  | 0.5726361185203382 |
| 0.3961283995727709 | 0.6380781157029253  | 0.5622540015571691 |
| 0.1976993341077007 | 0.3634723797983126  | 0.6190075689802038 |
| 0.1886002379783881 | 0.4945376355641237  | 0.5797608287886321 |
| 0.1949068142127722 | 0.6281392192818996  | 0.5725801658820721 |
| 0.9865961685046664 | 0.4606736882374617  | 0.7854781979434954 |

**Structure files (CONTCAR) involved in this work:**

|                    |                    |                    |
|--------------------|--------------------|--------------------|
| 0.9872433865676422 | 0.6304453234838951 | 0.7991771592839964 |
| 0.1411415029464325 | 0.5693924997650027 | 0.2228948279755179 |
| 0.1848851137708040 | 0.5582899554818577 | 0.4078533043674709 |
| 0.2979603247904938 | 0.5539742668113065 | 0.5134215115019245 |
| 0.4051724235304681 | 0.5691994580756248 | 0.3980485115483143 |
| 0.3962014820547117 | 0.5540777898797321 | 0.2012950769551857 |
| 0.2702785210979211 | 0.5496550720290567 | 0.2588135592129329 |
| 0.1405530676969268 | 0.3293042707424286 | 0.2475459098274627 |
| 0.1930979736208889 | 0.3554574709580270 | 0.4229648281840317 |
| 0.3101103317661610 | 0.3529351631917148 | 0.5143628724742469 |
| 0.4151983261211081 | 0.3279759577373689 | 0.3996296278098406 |
| 0.3970152845829570 | 0.3423458005935486 | 0.2051525216962851 |
| 0.2712092046982106 | 0.3524945179344069 | 0.2634778156114571 |
| 0.1825882372864300 | 0.4513472733060281 | 0.2862121447985969 |
| 0.4193353235410792 | 0.4493318233083110 | 0.3200801843707466 |
| 0.0691977316663815 | 0.6251328655418799 | 0.0790521046921941 |
| 0.0873059805380310 | 0.4940120012622320 | 0.0765205828293754 |
| 0.1005912112449054 | 0.3616744186945209 | 0.0641836551999627 |
| 0.3098247145515790 | 0.6351944372697634 | 0.1180008514353824 |
| 0.3057042600074872 | 0.5044616590237871 | 0.0782810844834050 |
| 0.3032917818170591 | 0.3698181916784273 | 0.0709648541664895 |
| 0.5123176036301553 | 0.5442842706491856 | 0.2840497128802851 |
| 0.5170494881277884 | 0.3625306488706359 | 0.2831447241293805 |
| 0.4377032281567165 | 0.7509042326662645 | 0.6426513847690973 |
| 0.1931061801363011 | 0.7503720433599731 | 0.6457646452129989 |
| 0.2757588105344060 | 0.7505916375984842 | 0.0399939061286793 |
| 0.1112801603250919 | 0.7488621087285312 | 0.0526300310596581 |
| 0.0596841012562106 | 0.2496157024206739 | 0.1474503419631037 |
| 0.3083541841307983 | 0.2494847664296974 | 0.1491699764456427 |
| 0.2264999922736853 | 0.2492526481035215 | 0.5328351223471453 |
| 0.3912585928248510 | 0.2500120768034104 | 0.5549679052299109 |
| 0.5618720549268161 | 0.2497952390734324 | 0.3659662349277220 |
| 0.8126029149480476 | 0.2533146021712708 | 0.3492227596907143 |
| 0.7280660494754250 | 0.2491086713680085 | 0.9697539177747997 |
| 0.8925301521994805 | 0.2499493095028396 | 0.9515156141965945 |
| 0.9411869970028104 | 0.7494044589543998 | 0.8604713588233703 |
| 0.6771959248164739 | 0.7511526837841075 | 0.8741584983955915 |
| 0.7641007204161390 | 0.7491459055643348 | 0.4406171189457787 |
| 0.6087498894267681 | 0.7497485571243928 | 0.4535129404856808 |
| 0.7970660457059393 | 0.6300420745979854 | 0.6919675279425376 |
| 0.7980720290431391 | 0.8713543395170698 | 0.6965797262180929 |
| 0.0201571645558093 | 0.8089782815864266 | 0.5251832402366743 |
| 0.9831331046069047 | 0.6876048778618618 | 0.4551476705566873 |
| 0.1712127317946437 | 0.7396544569773175 | 0.3829039263933648 |
| 0.9607972774182264 | 0.7770343399537499 | 0.4184628994160787 |
| 0.0312956623452549 | 0.7198669506677354 | 0.5756860439268485 |
| 0.9138516598444441 | 0.8047033028895441 | 0.5722326195862670 |
| 0.9171218518156993 | 0.6988411717822803 | 0.5875508209145214 |
| 0.2106534934970695 | 0.7558722344237315 | 0.4343175786450256 |
| 0.1902991910994666 | 0.7009603336437950 | 0.3320553403011948 |
| 0.1295612162919551 | 0.7182013954626602 | 0.4260015175216251 |
| 0.1528369168755726 | 0.7829880349549763 | 0.3403614068609523 |

**Figure S2 La/ZSM-5**

**Structure files (CONTCAR) involved in this work:**

```
1.0000000000000000
20.0219993591000005 0.0000000000000000 0.0000000000000000
0.0000000000000000 19.8990001678000006 0.0000000000000000
0.0000000000000000 0.0000000000000000 13.3830003737999998
Si Al O La H C
95 1 194 1 6 1
```

Direct

```
0.4249398106946196 0.0580314549853991 0.6431455580444219
0.3059554006383049 0.0313789770846840 0.7893201902214797
0.2803403044674703 0.0675207310593345 0.0091073453161968
0.1196225766024898 0.0696636333076413 0.0066303671092649
0.0675679026955313 0.0328244816528758 0.7947525444480421
0.1810635251184026 0.0588434685543271 0.6528591757109660
0.4201952741973120 0.8278718029390677 0.6662824730336032
0.3044110761021189 0.8731091041561289 0.8083611637943211
0.2670614707304279 0.8335793307637180 0.0260933816516279
0.1130195466444606 0.8311296992196514 0.0108541324603977
0.0639191376938328 0.8751241099108914 0.7977018459165477
0.1828195150548117 0.8316529022179758 0.6743074688846911
0.0776814662910646 0.9473351787787782 0.1458875712488080
0.1962378244042997 0.9749428950995724 0.2946947892140339
0.2199263766011834 0.9381749557975654 0.5126046138432958
0.3800284310225297 0.9346015355015944 0.5090808103872241
0.4327757960491038 0.9725330049635548 0.2988176801156217
0.3194621331625927 0.9497223989620415 0.1558169207104785
0.0798732406259768 0.1748525078876736 0.1660498714380551
0.1973384688529918 0.1320434981028304 0.3089640091719596
0.2351499959980753 0.1755592717615284 0.5242362813443152
0.3889430229655352 0.1751536636659782 0.5093415049914027
0.4367483703258560 0.1303601962614886 0.2980731524791093
0.3180368510748189 0.1715719824648074 0.1713749083042231
0.5750943156626200 0.5572379072691680 0.3479994399452330
0.6950436706744360 0.5270353143078883 0.2023539669035677
0.7184684004188580 0.5639151394663184 0.9852832877282639
0.8785871390363537 0.5682016066545608 0.9831268403251817
0.9322895391326588 0.5340291152319397 0.1912176655103716
0.8198822566935000 0.5551637005139051 0.3357873953849410
0.5842115122498394 0.3296120997336401 0.3302449362598298
0.6982538424757940 0.3699634684221285 0.1843050772084275
0.7344920125135935 0.3279250017525194 0.9677323287006171
0.8886289857184329 0.3250176702689088 0.9849759694675627
0.8135301088427033 0.3339718483102073 0.3298072455024376
0.9228563630835664 0.4431124478209426 0.8501848710499316
0.8045370166108875 0.4745861876868985 0.7056414265972558
0.7754202415787469 0.4426011496691818 0.4841619351080010
0.6185423983136594 0.4392218333382570 0.4871417327874146
0.5677175706359718 0.4718833956115266 0.6996242865748270
0.6805440205020192 0.4456791750056192 0.8430393643206365
0.9206002557959738 0.6745583849639805 0.8230053624176130
0.8055680655833078 0.6320552178644805 0.6835054771566919
0.7646148491681284 0.6703792568476973 0.4656966620637469
0.6103231185734171 0.6742288547601620 0.4818685179665739
0.5643370224381845 0.6295449651020065 0.6964974857496412
```

**Structure files (CONTCAR) involved in this work:**

0.6840553655315523 0.6721879251633781 0.8224726770091287  
0.5772335590504495 0.9452337582973195 0.3519454559819682  
0.6976205206994608 0.9731229945411874 0.2078475678960873  
0.7210730446836090 0.9363775679200135 0.9868923777853803  
0.8816389892529189 0.9337992592547495 0.9883835195734826  
0.9326362796609375 0.9724374795364538 0.2016323935983644  
0.8218733130879914 0.9455232006242552 0.3466297312273731  
0.5807632719789230 0.1755239911097567 0.3304819593098310  
0.6973135757506259 0.1318159375401433 0.1876029312266178  
0.7339858845769117 0.1709940894219623 0.9694941488097726  
0.8882764365635504 0.1731267453995382 0.9812809703637823  
0.8181678547534045 0.1751973958212109 0.3232577355552191  
0.9230756795436247 0.0550549531345284 0.8481056500391667  
0.8031387674275340 0.0270858143185325 0.7010540096660173  
0.7819407225606431 0.0663677259252368 0.4834059271720351  
0.6218873666943600 0.0681367007485918 0.4864275663653675  
0.5695913662037145 0.0306661492873778 0.6978433276770052  
0.6812822450743010 0.0537436539789892 0.8422165051630646  
0.9215253233479703 0.8288834152553035 0.8315839568051897  
0.8027438173224629 0.8700639382248528 0.6883424471549833  
0.7666522124060982 0.8269816527632616 0.4727103303353981  
0.6121716204902536 0.8276580571798803 0.4856336293664308  
0.5641953538795242 0.8724603411280855 0.6981902088892481  
0.6822291735849789 0.8307757529059493 0.8268061520359695  
0.4230980709540000 0.4456288278838049 0.6500378507007846  
0.3056515911091558 0.4749126760997683 0.8000073240342030  
0.2808887100006944 0.4359664536919743 0.0175108419716852  
0.1193107096442226 0.4352059967412783 0.0143370510536027  
0.0677926845887007 0.4692995360244832 0.8005410764355974  
0.1833470614332004 0.4468173810170919 0.6633658086573619  
0.4210075280475370 0.6731970137620953 0.6666490664475830  
0.3047680491636628 0.6330765472090800 0.8124206143521364  
0.2675198901337965 0.6762679913990262 0.0268565237278989  
0.1134661702357070 0.6767319006896125 0.0101050898128417  
0.0648604213180457 0.6280069915641466 0.7981272513030602  
0.1841835616934699 0.6728174072906308 0.6754707413582107  
0.0784824511470630 0.5622255630570766 0.1469691853513104  
0.1943725973269867 0.5323627008139082 0.2964526513896044  
0.2204166338957765 0.5656166701475557 0.5167814283609127  
0.3807890802726656 0.5659064354333363 0.5081583085468819  
0.4323531515288573 0.5313793344654063 0.2947006840861309  
0.3165335305225562 0.5596850158285943 0.1586444770064730  
0.0778738423177630 0.3295768593663598 0.1774403441100613  
0.1989189005012115 0.3734443169427665 0.3098535798097686  
0.2379306403387574 0.3333173913657857 0.5266888541043125  
0.3920466292527550 0.3287179068774768 0.5155075501993275  
0.4411767453451543 0.3735762810370102 0.3023398805037092  
0.3216215822189948 0.3299762943631158 0.1784946004666292  
0.9363555953401207 0.1308505609788371 0.1969612454042904  
0.9324828824036101 0.3737246250825626 0.1977156583147410  
0.3597356472750022 0.0654396244946724 0.7143131301714343  
0.3086636244516951 0.0705386590871816 0.8956256382926396  
0.1997934504723444 0.0587398349109342 0.0100459496179904



**Structure files (CONTCAR) involved in this work:**

0.0937218673248489 0.0738076255083584 0.8922590183634259  
0.1052502451950486 0.0606052261366243 0.6955726632738066  
0.2311499924896526 0.0384369971607150 0.7434866170874945  
0.3580757799175955 0.8305157840554023 0.7438977582031363  
0.3075455826281827 0.8469096434921976 0.9228235930617052  
0.1899677040975343 0.8580718994948056 0.0116036628982591  
0.0837217844556188 0.8345791549898366 0.8983942323680931  
0.1047617392840274 0.8435392343965843 0.7035905742737193  
0.2294931984261105 0.8616068896524712 0.7638594704884453  
0.3237823441109797 0.9523224192778024 0.8035685894183676  
0.0838383086351289 0.9536141309389857 0.8112033758860139  
0.4343466559766723 0.1268063196980465 0.5790539339276685  
0.4181861186631374 0.9956425419124295 0.5655950330702114  
0.3996825576654570 0.8639583535445657 0.5617406532360616  
0.1980658764226929 0.1336851434376883 0.6117894846824614  
0.1858022241720022 0.0041051491649405 0.5631591071791151  
0.1989968815310664 0.8695265508111210 0.5697134402337325  
0.9881664651704319 0.0443421241793485 0.7774395399421261  
0.9841801061212367 0.8671557292003523 0.7780280459222900  
0.1431758183022274 0.9430730245381967 0.2168233949145777  
0.1939180843782823 0.9322966219988450 0.3980238460629089  
0.3003258396010600 0.9478933002357680 0.5168061019637310  
0.4033322446348443 0.9305867917220380 0.3933710723851511  
0.3957127596453845 0.9493802390445175 0.1966593957362764  
0.2708961938130320 0.9713055049473588 0.2478097850218065  
0.1425169551760201 0.1708980870535646 0.2423328587820824  
0.1957078296290905 0.1659109100430728 0.4191858555983054  
0.3116317994174774 0.1491344622864356 0.5126306936070458  
0.4147737173909835 0.1746699898197089 0.3946644118123003  
0.3956170611105823 0.1566054142610716 0.2005358482097092  
0.2712164190061887 0.1402419984672924 0.2597848916232488  
0.1778551397599795 0.0531081819293502 0.3170709184210911  
0.4197784298923993 0.0520039242922103 0.3200353856703871  
0.0687581048266711 0.8767151305663590 0.0864827084932927  
0.0840357073001518 0.0074296862029343 0.0641531072406081  
0.0991530792463289 0.1396763505913814 0.0604972317063615  
0.3011183073536903 0.8749833053998526 0.1168184853743975  
0.3133216576568005 1.0030971480454591 0.0646370176074623  
0.3007645189785457 0.1371543105428110 0.0645133183474059  
0.5117228659282941 0.9573846355206013 0.2829234342365403  
0.5161857412273309 0.1399978897566287 0.2781533178181737  
0.6427231062087826 0.5587080915577157 0.2818359513492614  
0.6912333731791562 0.5701826153882019 0.0993757091810696  
0.7987738121584037 0.5536283440588993 0.9832635147893122  
0.9068942270634700 0.5784602005997124 0.0953306869196097  
0.8950656050435097 0.5608486950317002 0.2925463381225961  
0.7702572260403009 0.5305110016850979 0.2468732657979923  
0.6452318951239308 0.3282810869185677 0.2512864878298868  
0.6951433077706265 0.3400971131356086 0.0722067889880357  
0.8113751093902816 0.3521279028384952 0.9790313975536595  
0.9147350765956501 0.3230498123275757 0.0976972719580353  
0.8921741041369998 0.3522253427726626 0.3127912230535705  
0.7728541703492817 0.3602849293212935 0.2311019034080848

**Structure files (CONTCAR) involved in this work:**

|                    |                    |                    |
|--------------------|--------------------|--------------------|
| 0.6766181870558992 | 0.4486623182157930 | 0.1825211727149000 |
| 0.9178638947320882 | 0.4565079398661370 | 0.1702404296095249 |
| 0.5665666920681331 | 0.6283689516545259 | 0.4061471264801377 |
| 0.5753036395924904 | 0.4968903927649356 | 0.4303929682706088 |
| 0.6073257511233944 | 0.3673731474107607 | 0.4322995826357848 |
| 0.7971818129279202 | 0.6289166811865082 | 0.3742485556749437 |
| 0.8176891696189809 | 0.5011768996971558 | 0.4277351573777699 |
| 0.7842591286715315 | 0.3704033318082478 | 0.4294362085964122 |
| 0.0116781754041043 | 0.5480448181248435 | 0.2107815691497090 |
| 0.0156217032340728 | 0.3590643673031140 | 0.2422238384101278 |
| 0.8587671296608850 | 0.4367980661361632 | 0.7757974817855342 |
| 0.8025010345986604 | 0.4361757773595652 | 0.5983541559337625 |
| 0.6964942980209726 | 0.4623028165494274 | 0.4838903218658383 |
| 0.5930436601819677 | 0.4309706115438481 | 0.6014268992755986 |
| 0.6051756961929005 | 0.4441685057344653 | 0.7985519328575206 |
| 0.7306608835370242 | 0.4707712891017803 | 0.7549565338335135 |
| 0.8620669813422960 | 0.6764464470882975 | 0.7393054302542721 |
| 0.8054527895227171 | 0.6546491229626632 | 0.5675495827569945 |
| 0.6872190828323396 | 0.6477338524764086 | 0.4816835511439839 |
| 0.5810973551190607 | 0.6700240909129372 | 0.5944533916118387 |
| 0.6066451894365460 | 0.6609432618960375 | 0.7890181042477133 |
| 0.7323622096488782 | 0.6452575624930161 | 0.7328792916094887 |
| 0.8253535535384996 | 0.5529837488007597 | 0.6923437581778428 |
| 0.5838671333953461 | 0.5510616451898706 | 0.6819983607926923 |
| 0.9325575035926387 | 0.3737864111038291 | 0.9120512064458995 |
| 0.9153553456854091 | 0.5058501811859134 | 0.9271816179967967 |
| 0.8937381133524189 | 0.6373932018370219 | 0.9228681399947773 |
| 0.6989277895998295 | 0.3703236989672193 | 0.8790218057819436 |
| 0.6835216930413245 | 0.4980448882031627 | 0.9359586240643596 |
| 0.6985348863053372 | 0.6320854729836902 | 0.9257012188406105 |
| 0.4882571619638049 | 0.4607456117344588 | 0.7181633773710941 |
| 0.4849414297695715 | 0.6374250585270564 | 0.7201445608957104 |
| 0.6425237111074887 | 0.9393534757807774 | 0.2809814239822324 |
| 0.6969993066471724 | 0.9330346667433427 | 0.1023684062244483 |
| 0.8016090908857084 | 0.9443642395224361 | 0.9788352608907680 |
| 0.9041993972500576 | 0.9327832877125521 | 0.1043917045912535 |
| 0.8971973609995987 | 0.9437106557142894 | 0.3019057718553280 |
| 0.7713426555435553 | 0.9664283518874314 | 0.2568495089263154 |
| 0.6422618934047691 | 0.1723795077879128 | 0.2522034766662124 |
| 0.6937773350556569 | 0.1580578436204145 | 0.0732430984176087 |
| 0.8110900962229023 | 0.1467033265408491 | 0.9840838260913453 |
| 0.9188156418717174 | 0.1684356553500630 | 0.0931357632024757 |
| 0.8959518092196243 | 0.1657557484477657 | 0.2893054214151288 |
| 0.7713607934807272 | 0.1460230131030856 | 0.2334434958206098 |
| 0.6802609771555673 | 0.0520610115377425 | 0.1916471768347604 |
| 0.9163488253564880 | 0.0520272873293841 | 0.1888129693433388 |
| 0.5675531525234049 | 0.8757848733386773 | 0.4141360428519336 |
| 0.5833782300482732 | 0.0065774202568961 | 0.4315955403706528 |
| 0.6002894808822350 | 0.1385727182518436 | 0.4347411460687268 |
| 0.8045283244072142 | 0.8713882899368963 | 0.3888903920841345 |
| 0.8182384215240279 | 1.0008058019324579 | 0.4357242898399135 |
| 0.8044949465698943 | 0.1346677554540300 | 0.4266000703693203 |
| 0.0123538123938616 | 0.9600794659819530 | 0.2147967717912281 |

**Structure files (CONTCAR) involved in this work:**

|                    |                    |                    |
|--------------------|--------------------|--------------------|
| 0.0161158520034867 | 0.1382210453900321 | 0.2189072249518110 |
| 0.8570118510866405 | 0.0576479815146503 | 0.7787046890325615 |
| 0.8043130388772607 | 0.0721325876722132 | 0.5997913756251800 |
| 0.7016320924170077 | 0.0563670184092701 | 0.4742447940428663 |
| 0.6005381651423456 | 0.0714484161886117 | 0.6031085343295253 |
| 0.6051370240737231 | 0.0545833885360386 | 0.8007523453370826 |
| 0.7292815823539744 | 0.0301101569874831 | 0.7507005126628736 |
| 0.8576596205447153 | 0.8336088883872699 | 0.7580155846948409 |
| 0.8040102802588398 | 0.8339320238255942 | 0.5799329404601534 |
| 0.6896701106343760 | 0.8528726444017178 | 0.4831584395862211 |
| 0.5851394436675873 | 0.8296718929166488 | 0.5997496677280978 |
| 0.6046528267740996 | 0.8437000032981365 | 0.7948105205520613 |
| 0.7291373649843291 | 0.8619638901284463 | 0.7385736031668720 |
| 0.8208642681959407 | 0.9492242298667715 | 0.6754345391089857 |
| 0.5820387524039993 | 0.9509237333341253 | 0.6791308132787567 |
| 0.9314936246289163 | 0.1257114053160172 | 0.9067665701683456 |
| 0.9191127071382864 | 0.9945522315550799 | 0.9296389817940941 |
| 0.9037229155795676 | 0.8626118266907851 | 0.9390707915221296 |
| 0.7001457302934847 | 0.1286750060378162 | 0.8794028286354304 |
| 0.6867108341450152 | 0.0014987245592433 | 0.9349898452638021 |
| 0.6976577401825276 | 0.8673639121766439 | 0.9327163511892868 |
| 0.4905917762502752 | 0.0466784687799625 | 0.7117086856922195 |
| 0.4843935044217247 | 0.8642788804331646 | 0.7179998756595205 |
| 0.3572898013561580 | 0.4426645280377096 | 0.7203591024174258 |
| 0.3107122870226983 | 0.4342598440706839 | 0.9046965953710382 |
| 0.2001478119779617 | 0.4330632686178815 | 0.0175096698896537 |
| 0.0938104541622533 | 0.4301756346972681 | 0.8997776770380309 |
| 0.1068551679322463 | 0.4401915947897068 | 0.7026376932087436 |
| 0.2299311294195539 | 0.4680244391672244 | 0.7574868551647873 |
| 0.3586177788621159 | 0.6716136636802804 | 0.7433747629970460 |
| 0.3087712195072207 | 0.6642615682483785 | 0.9239206907949074 |
| 0.1908377948636395 | 0.6510410346136253 | 0.0111395772680523 |
| 0.0844385616096091 | 0.6703864777304294 | 0.8975610564068938 |
| 0.1063746054509603 | 0.6581142452933739 | 0.7033296823878247 |
| 0.2301426243272653 | 0.6438777728163095 | 0.7665699267405445 |
| 0.3230767417947694 | 0.5536975788248945 | 0.8164649164034775 |
| 0.0830965439013280 | 0.5491691353645285 | 0.8135866258505693 |
| 0.4327251824431110 | 0.3729635326401303 | 0.5967232074554716 |
| 0.4164225318750312 | 0.5027403727061288 | 0.5636587971012802 |
| 0.4015296685072567 | 0.6355085259256373 | 0.5630178892601461 |
| 0.2060658850904222 | 0.3742559982034363 | 0.6196503105289387 |
| 0.1869181960885271 | 0.5029921182068169 | 0.5760457148836408 |
| 0.2031293701939770 | 0.6363735715598927 | 0.5708069878289104 |
| 0.9890210389486659 | 0.4554255856710523 | 0.7818616343652939 |
| 0.9854595001814295 | 0.6362895701750303 | 0.7762987731154012 |
| 0.1414833186002538 | 0.5684242926735603 | 0.2228661115534116 |
| 0.1888629061182450 | 0.5673982366367566 | 0.4053710347586261 |
| 0.3006309246014829 | 0.5546768674547152 | 0.5130517744245189 |
| 0.4057075429925326 | 0.5709315055129163 | 0.3933492326035016 |
| 0.3936093930794362 | 0.5571692851634639 | 0.1954840534276631 |
| 0.2698588729363725 | 0.5422917189267585 | 0.2546469082041240 |
| 0.1443922563984489 | 0.3299178009934107 | 0.2482556231279792 |
| 0.1946921822722776 | 0.3494113337869941 | 0.4261644132779037 |

**Structure files (CONTCAR) involved in this work:**

|                    |                    |                    |
|--------------------|--------------------|--------------------|
| 0.3150176224728877 | 0.3555857304692311 | 0.5085345901021782 |
| 0.4260991670612919 | 0.3349587363478143 | 0.4065928560409811 |
| 0.3990927018939996 | 0.3377235035162374 | 0.2129588339185423 |
| 0.2736065755219814 | 0.3602844474165298 | 0.2665757477848114 |
| 0.1785835025549928 | 0.4521725280580032 | 0.3027669186649786 |
| 0.4188472122883780 | 0.4515920092782717 | 0.3113899903671368 |
| 0.0693786274397569 | 0.6326226450084232 | 0.0872326611193828 |
| 0.0923629212432829 | 0.5041560078140239 | 0.0641594411291849 |
| 0.0898746542243478 | 0.3715525365523412 | 0.0753369642213493 |
| 0.3011851417423090 | 0.6346422644690329 | 0.1176756619597854 |
| 0.3045520281946785 | 0.5054511539079943 | 0.0700364049524316 |
| 0.3100069101899146 | 0.3705652478398158 | 0.0750962019832482 |
| 0.5109888979769528 | 0.5466325964988035 | 0.2754516483318575 |
| 0.5206189557668889 | 0.3677269069105867 | 0.2789144928159969 |
| 0.4382802975598021 | 0.7505876868423432 | 0.6401128703568829 |
| 0.1973006200845863 | 0.7523268461178440 | 0.6597129907854137 |
| 0.2702759443824592 | 0.7550021874890152 | 0.0564808522838405 |
| 0.1093625400699490 | 0.7539236698419378 | 0.0479221093340997 |
| 0.0630622326264447 | 0.2527105412776274 | 0.1440673482805762 |
| 0.3043667583755186 | 0.2514493715522885 | 0.1602611944249556 |
| 0.2331333070576969 | 0.2543069913307989 | 0.5548185519407255 |
| 0.3940266213860320 | 0.2511466823768037 | 0.5521755731788369 |
| 0.5638304469558884 | 0.2530045464453167 | 0.3578295154452815 |
| 0.8026284958715544 | 0.2536919897989557 | 0.3440356627990089 |
| 0.7297643306002921 | 0.2492327101796490 | 0.9377584713676894 |
| 0.8921920608136751 | 0.2490605748615963 | 0.9385558124391027 |
| 0.9404967532534303 | 0.7510539064757817 | 0.8519486150233134 |
| 0.6971818817651007 | 0.7514487061718944 | 0.8418395544248333 |
| 0.7689779123230606 | 0.7493475008283048 | 0.4371206202551317 |
| 0.6059671951242471 | 0.7514531403092327 | 0.4438458101107205 |
| 0.0121271229360419 | 0.4718839709799278 | 0.4445963720056892 |
| 0.9188573865697969 | 0.3440267580807569 | 0.5472329741721188 |
| 0.9896633507356408 | 0.3690407382780445 | 0.4369931239628315 |
| 0.0112328226548212 | 0.5206462704575585 | 0.4454300113953823 |
| 0.8817341832581410 | 0.3479233404352640 | 0.5934472848024193 |
| 0.0864272820178630 | 0.3276523736704496 | 0.5805882440351469 |
| 0.0152797758858239 | 0.2718293335262663 | 0.5924890444739465 |
| 0.0849626309698270 | 0.2491428946487823 | 0.5115018878511538 |
| 0.0947051675894735 | 0.2507640192319648 | 0.6435000841968505 |
| 0.0694732252883862 | 0.2749799103043505 | 0.5803734445728618 |

**Figure S2 Cu/ZSM-5**

1.0000000000000000

20.0219993591000005 0.0000000000000000 0.0000000000000000

0.0000000000000000 19.8990001678000006 0.0000000000000000

0.0000000000000000 0.0000000000000000 13.3830003737999998

Si O Al Cu C H

94 195 2 3 1 4

Direct

0.4212825525090770 0.0561317673341371 0.6441535022839826

0.3042374174461980 0.0283765289033295 0.7917563228785008

0.2786933387903653 0.0630838068549574 0.0116858689888918

0.1182760299265263 0.0646011255251488 0.0074709835631245

0.0643114847598788 0.0266245535785336 0.7947034164895784

**Structure files (CONTCAR) involved in this work:**

|                    |                    |                    |
|--------------------|--------------------|--------------------|
| 0.1798874715544327 | 0.0548420301088441 | 0.6558805461599840 |
| 0.4183667748115866 | 0.8274317133416973 | 0.6659187652223937 |
| 0.3041324568391875 | 0.8703620557748152 | 0.8093741807518687 |
| 0.2680086433822045 | 0.8294799148624432 | 0.0280475701534355 |
| 0.1138477619312872 | 0.8265853405996476 | 0.0133152352378266 |
| 0.0641807141732265 | 0.8657025426823416 | 0.7969947199259324 |
| 0.1850363670084617 | 0.8283380138617645 | 0.6727808314804270 |
| 0.0763083295815577 | 0.9424342738426417 | 0.1469620399496526 |
| 0.1945558972410758 | 0.9707264862560985 | 0.2930449570841332 |
| 0.2193403552968188 | 0.9363067443610763 | 0.5113607521676109 |
| 0.3787831483597830 | 0.9321895819988737 | 0.5085996744603972 |
| 0.4334836949185563 | 0.9703053948580231 | 0.2994871127931017 |
| 0.3194236296462333 | 0.9450844353016131 | 0.1579127570922000 |
| 0.0802960169864970 | 0.1717455861613974 | 0.1640191352661650 |
| 0.1958109472281493 | 0.1289736950082124 | 0.3079565845000272 |
| 0.2308908516173626 | 0.1714817834884581 | 0.5245124087202925 |
| 0.3856144450597556 | 0.1730017428969747 | 0.5076550101830906 |
| 0.4352265476728817 | 0.1277879026603301 | 0.2974802654689234 |
| 0.3164232397153666 | 0.1693775261173596 | 0.1726100999565463 |
| 0.5771577831144817 | 0.5584466858275945 | 0.3510427214327298 |
| 0.6955222355926548 | 0.5282215847982916 | 0.2127111557685670 |
| 0.7166386789287209 | 0.5507181407796911 | 0.9831944246014573 |
| 0.8741220062359747 | 0.5644947837595732 | 0.9897178396433481 |
| 0.9305735983869140 | 0.5300343054622025 | 0.2016141274342301 |
| 0.8197408217403044 | 0.5597641783461418 | 0.3442183492117371 |
| 0.5809679671101692 | 0.3264823789426395 | 0.3287366329971061 |
| 0.6979179586840257 | 0.3709748212983808 | 0.1966988909266195 |
| 0.7341586050336174 | 0.3293740940912764 | 0.9799224057936327 |
| 0.8882085922852742 | 0.3303295041910306 | 0.9945916706315348 |
| 0.9367571047205351 | 0.3715348188532485 | 0.2064977499559728 |
| 0.8191753635825675 | 0.3307338034958789 | 0.3338168502824547 |
| 0.9251445904981573 | 0.4449292154766465 | 0.8566457218319620 |
| 0.8068701636898152 | 0.4690491866240108 | 0.7134923689185528 |
| 0.7812533258446129 | 0.4404771659682638 | 0.4915993150399562 |
| 0.6210429514656548 | 0.4336977895932477 | 0.4876951522076589 |
| 0.5647566924924047 | 0.4649472987188416 | 0.6989856332820252 |
| 0.6788223722699941 | 0.4341546675650710 | 0.8375550714465665 |
| 0.7993105838577105 | 0.6264584621470222 | 0.6966562153981722 |
| 0.7649016787948858 | 0.6692266462915823 | 0.4761692205015344 |
| 0.6099953828831601 | 0.6730132352375872 | 0.4867143647117093 |
| 0.5636682482248679 | 0.6232834239604198 | 0.7002482915280467 |
| 0.6770942661042628 | 0.6676084841021434 | 0.8316789772312305 |
| 0.5789074095639776 | 0.9416368694649261 | 0.3463007088113537 |
| 0.6949728710299540 | 0.9734582924324033 | 0.2036670415679680 |
| 0.7187364799595503 | 0.9505206990595768 | 0.9776998183885252 |
| 0.8790966172683321 | 0.9484200280161773 | 0.9852713322675847 |
| 0.9324105997217569 | 0.9694111894210956 | 0.2008483431613990 |
| 0.8160587920868534 | 0.9353067280568281 | 0.3300013953970650 |
| 0.5801094500130030 | 0.1736981723694870 | 0.3219897187257060 |
| 0.6981103944558419 | 0.1304594193648299 | 0.1908416502967734 |
| 0.7369450050883187 | 0.1677940843676479 | 0.9740634525878360 |
| 0.8921333800326634 | 0.1761359543012392 | 0.9798436148112254 |
| 0.9380346001818859 | 0.1280433018913653 | 0.1968983562749870 |

**Structure files (CONTCAR) involved in this work:**

|                    |                    |                    |
|--------------------|--------------------|--------------------|
| 0.8200982745158939 | 0.1749017204800377 | 0.3232566321303356 |
| 0.9225563817751345 | 0.0663346750438480 | 0.8436783475406002 |
| 0.8073680157790835 | 0.0323421584194911 | 0.6972242018190061 |
| 0.7830309527716244 | 0.0594244790457128 | 0.4759207855232692 |
| 0.6230712025486658 | 0.0671938050166854 | 0.4813160895750069 |
| 0.5656471695058600 | 0.0352396780477993 | 0.6924337455242737 |
| 0.6828762958395181 | 0.0661802821243393 | 0.8220834085155772 |
| 0.9156640978330958 | 0.8307337131738906 | 0.8321151446173618 |
| 0.8019534838608211 | 0.8737841183284345 | 0.6905280433059471 |
| 0.7663094457774505 | 0.8302167618780327 | 0.4771023391706373 |
| 0.6100090843746848 | 0.8278689516684371 | 0.4893736488525469 |
| 0.5605054041645019 | 0.8768724152321462 | 0.7015821380828683 |
| 0.4209435621583755 | 0.4424197903617286 | 0.6490931759772811 |
| 0.3043321723316928 | 0.4717978207341661 | 0.7954269124771732 |
| 0.2810123593638795 | 0.4368944294564330 | 0.0164262959419532 |
| 0.1207658072057781 | 0.4334797814515730 | 0.0119032746381189 |
| 0.0689631817679116 | 0.4703749752394540 | 0.7998819917002162 |
| 0.1813040853997414 | 0.4451142230781717 | 0.6586930137854655 |
| 0.4199104998693486 | 0.6730561750649182 | 0.6677399083271575 |
| 0.3067087563203963 | 0.6294374933677791 | 0.8121502829368905 |
| 0.2682785156332340 | 0.6711489360752670 | 0.0291859655948419 |
| 0.1145396255882794 | 0.6732363047820191 | 0.0102414546675691 |
| 0.0671750891544424 | 0.6294181644338649 | 0.7962891252995281 |
| 0.1876415322491378 | 0.6700815198078682 | 0.6723375660968491 |
| 0.0758894853333901 | 0.5576054971099786 | 0.1443606950633240 |
| 0.1932660740829760 | 0.5284760983514418 | 0.2923675934888625 |
| 0.2204692759667151 | 0.5624226286115314 | 0.5112949810250067 |
| 0.3795706620649226 | 0.5657206057709687 | 0.5110970534161644 |
| 0.4340018458631396 | 0.5298886214410039 | 0.3005308317682890 |
| 0.3193854965102028 | 0.5561947764493945 | 0.1601088095101613 |
| 0.0801465118335384 | 0.3259447489532916 | 0.1684027767193287 |
| 0.1958097189938633 | 0.3701448356212301 | 0.3091212211614180 |
| 0.2329726686347244 | 0.3293728262100195 | 0.5263340154190053 |
| 0.3877961087584037 | 0.3260744476843980 | 0.5118526199067464 |
| 0.4374870152129912 | 0.3719666066716819 | 0.3003229383729084 |
| 0.3180586965215466 | 0.3287494972218404 | 0.1754955858535878 |
| 0.3557236951254443 | 0.0638071528563152 | 0.7146233315650019 |
| 0.3080506534122206 | 0.0666948813465740 | 0.8987473894186460 |
| 0.1982951095620571 | 0.0527940817631779 | 0.0104832003678919 |
| 0.0917285733065061 | 0.0652774822486344 | 0.8934330174082787 |
| 0.1037299222762509 | 0.0538850102511734 | 0.6970100683030408 |
| 0.2287232541748422 | 0.0346206045449120 | 0.7482920885940035 |
| 0.3573078858942199 | 0.8268371805404474 | 0.7457832392035377 |
| 0.3066233045447005 | 0.8447179216290197 | 0.9240320106346852 |
| 0.1905157180615712 | 0.8536963828111681 | 0.0189846230534993 |
| 0.0890259577234523 | 0.8292899850235006 | 0.8985141182548120 |
| 0.1067426910105825 | 0.8386314032218160 | 0.7017124269963808 |
| 0.2293349434484798 | 0.8591319792286821 | 0.7643333778365385 |
| 0.3236132607440022 | 0.9495269491879541 | 0.8040963626663753 |
| 0.0737560570238588 | 0.9461946996991369 | 0.8091466224909911 |
| 0.4298440324438780 | 0.1237913994524655 | 0.5774620404838838 |
| 0.4162442906464676 | 0.9918297957920309 | 0.5695911623858454 |
| 0.3930263808668524 | 0.8600934626413785 | 0.5609514510457060 |

**Structure files (CONTCAR) involved in this work:**

|                    |                    |                    |
|--------------------|--------------------|--------------------|
| 0.1972007420920626 | 0.1296137751401788 | 0.6153005514415181 |
| 0.1858484190269534 | 0.0008730864931712 | 0.5656151417207096 |
| 0.2015468407213548 | 0.8669402669618488 | 0.5689308002670235 |
| 0.9858882356964231 | 0.0435100321970002 | 0.7765776057858808 |
| 0.9867833099244215 | 0.8450659867531815 | 0.7777595334889170 |
| 0.1423444483407595 | 0.9361378022935729 | 0.2162456028629709 |
| 0.1894929168160913 | 0.9313929613441807 | 0.3988916373567264 |
| 0.2993996449936097 | 0.9481357470438785 | 0.5083048370107192 |
| 0.4069750637048730 | 0.9279662226333327 | 0.3953321775566295 |
| 0.3956476895737606 | 0.9464095622172548 | 0.1984717337293656 |
| 0.2701195118895929 | 0.9644872503934182 | 0.2500621399750924 |
| 0.1436671795671415 | 0.1699968501734515 | 0.2389040504907251 |
| 0.1907163263189656 | 0.1576649607934952 | 0.4209915755222876 |
| 0.3081637983842631 | 0.1479436201651990 | 0.5096819120519173 |
| 0.4132599102926158 | 0.1723048592540339 | 0.3937123014808258 |
| 0.3942238099631402 | 0.1536594948778812 | 0.1996248852287805 |
| 0.2709679284070960 | 0.1403161117578536 | 0.2642938105422866 |
| 0.1763691775861423 | 0.0497825681200993 | 0.3065966632091184 |
| 0.4188856588224286 | 0.0494794212670605 | 0.3206493140214299 |
| 0.0669254259990352 | 0.8730030857397481 | 0.0842523932155725 |
| 0.0820123763593442 | 0.0044026948358662 | 0.0685322856936297 |
| 0.0988661743848127 | 0.1361190537789213 | 0.0582558230845556 |
| 0.3036779907173748 | 0.8698106486979237 | 0.1184136607574302 |
| 0.3118884141224990 | 0.9988512259756492 | 0.0674416502030476 |
| 0.2969949071706723 | 0.1329271622048511 | 0.0680286535706976 |
| 0.5124164156421244 | 0.9567227422795344 | 0.2808984487710596 |
| 0.5145748785317378 | 0.1368190329790758 | 0.2756276566641850 |
| 0.6417624732890101 | 0.5696377413948439 | 0.2786268705933058 |
| 0.6912004862986829 | 0.5566003585357185 | 0.0981661404549787 |
| 0.7965086951429220 | 0.5413453132887156 | 0.9731447879117521 |
| 0.8962298866168695 | 0.5663239088492933 | 0.1054746022727176 |
| 0.8959100704029556 | 0.5569755278907751 | 0.3034607471780972 |
| 0.7709362228412006 | 0.5402663369615759 | 0.2510883928037370 |
| 0.6423627972937811 | 0.3244504739722629 | 0.2497627340221619 |
| 0.6953120946694599 | 0.3565713503634302 | 0.0780970791502540 |
| 0.8110011622947256 | 0.3557546228836190 | 0.9864598680828790 |
| 0.9122430135997699 | 0.3285422317234654 | 0.1101018074430964 |
| 0.8970138638952772 | 0.3442158400777355 | 0.3044547609660445 |
| 0.7721781540497309 | 0.3554507619226848 | 0.2405798126342097 |
| 0.6775565736423832 | 0.4490038485552237 | 0.2168119049062787 |
| 0.9187234708412552 | 0.4499314246022429 | 0.1879765362478097 |
| 0.5633239578466666 | 0.6263988520449643 | 0.4152431152017426 |
| 0.5883409762712569 | 0.4961873837568464 | 0.4273540466168572 |
| 0.6055732932709386 | 0.3638055462175912 | 0.4300428421405197 |
| 0.8035717944062808 | 0.6351207496160598 | 0.3824058788862062 |
| 0.8104350168589050 | 0.5056995784373952 | 0.4337031607595508 |
| 0.8008676747206023 | 0.3715749645965222 | 0.4345286281055497 |
| 0.0091970898878201 | 0.5476129639447942 | 0.2114075800832959 |
| 0.0166628110262757 | 0.3624964241650171 | 0.2223253492313833 |
| 0.8595255732244875 | 0.4322860462926408 | 0.7878208493509424 |
| 0.8142451473537534 | 0.4378784610046514 | 0.6021437985166544 |
| 0.7005899482170940 | 0.4465379844534866 | 0.4983458104863583 |
| 0.5871843859835516 | 0.4273233795775707 | 0.5969316036866353 |

**Structure files (CONTCAR) involved in this work:**

|                    |                    |                     |
|--------------------|--------------------|---------------------|
| 0.6039594201527559 | 0.4316435823868955 | 0.7929114412407967  |
| 0.7306260102981199 | 0.4555405602648452 | 0.7503584852186993  |
| 0.8512701324181690 | 0.6766596238469239 | 0.7465076858149209  |
| 0.7956962421762274 | 0.6385143247260094 | 0.5776158089355796  |
| 0.6865323355559524 | 0.6482601296031555 | 0.4712360713097983  |
| 0.5892713284592294 | 0.6648288099654249 | 0.6033085346615150  |
| 0.6000013349727116 | 0.6525880444977824 | 0.8005300060326321  |
| 0.7246311137121250 | 0.6360980190982688 | 0.7458332218473528  |
| 0.8222814772290524 | 0.5488369809228075 | 0.7160769882263234  |
| 0.5826719337854599 | 0.5443555309224833 | 0.6885873542171079  |
| 0.9352392985353262 | 0.3804081332635210 | 0.9298173315796893  |
| 0.9189595919418858 | 0.5118208413294781 | 0.9264125013155574  |
| 0.8915795648079720 | 0.6386024210586436 | 0.9417883297232230  |
| 0.6980527004250345 | 0.3610182302907108 | 0.8821515465324976  |
| 0.6791058610847653 | 0.4906611830370655 | 0.9264802511907717  |
| 0.6915562974667065 | 0.6251891367461969 | 0.9398757859692700  |
| 0.4857474366365725 | 0.4537570235876959 | 0.7200694370634955  |
| 0.4836561408761935 | 0.6320725829153834 | 0.7125205073462271  |
| 0.6412760343909504 | 0.9318602855459516 | 0.2696197120495070  |
| 0.6828306121806081 | 0.9576179566274996 | 0.0860750288311877  |
| 0.7987409569001888 | 0.9586608352936468 | -0.0122591695727503 |
| 0.9074352544717667 | 0.9359575873510025 | 0.0966712474201502  |
| 0.8935608735202140 | 0.9353926191987364 | 0.2944694198629856  |
| 0.7702720105905883 | 0.9495665303720852 | 0.2311288571802973  |
| 0.6377623871418410 | 0.1753010747651047 | 0.2361611959639422  |
| 0.6983404521279163 | 0.1357878153908824 | 0.0699507969033865  |
| 0.8156200431190840 | 0.1475735468173510 | 0.9786815701214056  |
| 0.9229916033313863 | 0.1628791571506221 | 0.0897091171448093  |
| 0.8967186223663660 | 0.1668403663165423 | 0.2844311698829268  |
| 0.7703507201428401 | 0.1562384073002265 | 0.2308423754672072  |
| 0.6857954906060049 | 0.0531993733582640 | 0.2261200431121007  |
| 0.9161915390845555 | 0.0495439959315667 | 0.1969139752308870  |
| 0.5679316214787932 | 0.8735278149304488 | 0.4106560556674834  |
| 0.5922721895865487 | 0.0035125537553528 | 0.4220673955766072  |
| 0.6071757993152616 | 0.1360062776147425 | 0.4211556321260956  |
| 0.7972356645838610 | 0.8626465691799258 | 0.3759101961889273  |
| 0.8039845246290601 | 0.9938941645930228 | 0.4118288415913290  |
| 0.8060911914883238 | 0.1274829058054834 | 0.4190411549658914  |
| 0.0114198231609945 | 0.9547000875087150 | 0.2172868198371315  |
| 0.0177110041922975 | 0.1343026869622152 | 0.2187450044400247  |
| 0.8575916853579009 | 0.0717037692943578 | 0.7721275941045080  |
| 0.8207120823486108 | 0.0567601945249191 | 0.5832476918715815  |
| 0.7030482926064834 | 0.0587603894080261 | 0.4928278532846375  |
| 0.5878781044874777 | 0.0726006435989925 | 0.5896363629917781  |
| 0.6061420703724169 | 0.0695146341421064 | 0.7847831460003918  |
| 0.7308457172498356 | 0.0516739372762828 | 0.7267090707078845  |
| 0.8594586947975047 | 0.8297618162419850 | 0.7463679492803733  |
| 0.8080511315499304 | 0.8596566679189304 | 0.5710259768759605  |
| 0.6879646259266965 | 0.8510083135390822 | 0.4861680907795064  |
| 0.5812103098803234 | 0.8349248703302287 | 0.6012546722331819  |
| 0.5958868545113446 | 0.8466756895493156 | 0.7989753669684443  |
| 0.7294688846652606 | 0.8546919910095381 | 0.7311878812641636  |
| 0.8204065753921430 | 0.9526565264635674 | 0.7110329521571270  |



**Structure files (CONTCAR) involved in this work:**

|                    |                    |                    |
|--------------------|--------------------|--------------------|
| 0.5811262574738820 | 0.9555255098832189 | 0.6837488216586567 |
| 0.9362170034127095 | 0.1394303173396910 | 0.8938167908222884 |
| 0.9122126576222159 | 0.0154221639167194 | 0.9376416145088782 |
| 0.9014070457119003 | 0.8854738253574655 | 0.9176762171120642 |
| 0.7028721959481360 | 0.1371033247430329 | 0.8741876740550752 |
| 0.6887584050712452 | 0.0047133666434939 | 0.9015802953253627 |
| 0.7008156401688388 | 0.8736831395041310 | 0.9403577328561560 |
| 0.4867994387619337 | 0.0481404451916146 | 0.7142614549497445 |
| 0.4792742244474514 | 0.8709913893835517 | 0.7124984649494102 |
| 0.3549555244877363 | 0.4351282113538242 | 0.7182938739310019 |
| 0.3076128064157077 | 0.4332817445970212 | 0.9020979627790260 |
| 0.2005425778489177 | 0.4458553249143078 | 0.0205230448989300 |
| 0.0980538621313264 | 0.4298343596890630 | 0.8961437862845972 |
| 0.1049716040156266 | 0.4432083855295602 | 0.6989828750119340 |
| 0.2288502485294332 | 0.4672125849194487 | 0.7517863872456555 |
| 0.3616976468517550 | 0.6725454170415132 | 0.7515029088383933 |
| 0.3082455889680461 | 0.6550751267419287 | 0.9266967878792516 |
| 0.1911921121961184 | 0.6463065706928973 | 0.0180823708614815 |
| 0.0910388729931625 | 0.6713799152773766 | 0.8949175493364894 |
| 0.1101207031582077 | 0.6558643858238317 | 0.7003154558017417 |
| 0.2331562642215244 | 0.6412238248320568 | 0.7639293265099796 |
| 0.3259143409204415 | 0.5501122759657495 | 0.8072465438301061 |
| 0.0827320248990645 | 0.5499955974740198 | 0.8158316440026298 |
| 0.4309112432745357 | 0.3731673904200004 | 0.5866961763718523 |
| 0.4160221184341901 | 0.5053127425987527 | 0.5719071853851517 |
| 0.3930947398630335 | 0.6372517408641796 | 0.5659453132207516 |
| 0.2013713597779596 | 0.3709190397055615 | 0.6189198037894710 |
| 0.1865263183060639 | 0.4993381480346034 | 0.5686692323583377 |
| 0.2061450270462562 | 0.6329218740317549 | 0.5678724921199049 |
| 0.9898855970060619 | 0.4542836374198987 | 0.7858179212779193 |
| 0.9896172348534514 | 0.6428947127249950 | 0.7760120012512212 |
| 0.1404511165761311 | 0.5639015012393980 | 0.2170262719421907 |
| 0.1886992364946405 | 0.5660394397982300 | 0.3997640571615532 |
| 0.3004175923891220 | 0.5493900457212003 | 0.5057249716685985 |
| 0.4100905612598150 | 0.5705995987042397 | 0.3993266923857504 |
| 0.3952010775535229 | 0.5570008992407959 | 0.2023937501279471 |
| 0.2690343689807460 | 0.5356752122825550 | 0.2503321317156307 |
| 0.1425290255077845 | 0.3265016045269671 | 0.2454671588840684 |
| 0.1921699315196212 | 0.3457183778510749 | 0.4243572366640752 |
| 0.3105295795927993 | 0.3516245346009938 | 0.5102970025176966 |
| 0.4186855060539676 | 0.3301605091590469 | 0.4002758104791678 |
| 0.3958403481095411 | 0.3414341398195043 | 0.2062190962395432 |
| 0.2707830542106248 | 0.3577165590470398 | 0.2651975669870301 |
| 0.1754643171218221 | 0.4490270667027822 | 0.3019484332422587 |
| 0.4186192595824196 | 0.4504512876553310 | 0.3170955409127739 |
| 0.0671948330949250 | 0.6261634988862483 | 0.0796921056876051 |
| 0.0824073374256991 | 0.4946265143564329 | 0.0679366706643753 |
| 0.1003011367992693 | 0.3630536879665996 | 0.0646803534467853 |
| 0.3028337077450724 | 0.6312736680347794 | 0.1208849133418406 |
| 0.3145335591058266 | 0.5020505357579869 | 0.0695718466121015 |
| 0.3021843447662149 | 0.3674110497662701 | 0.0713660297348586 |
| 0.5130436673580877 | 0.5430096330153700 | 0.2807060705627772 |
| 0.5172033218860244 | 0.3646777598256344 | 0.2785405674818594 |

**Structure files (CONTCAR) involved in this work:**

|                    |                    |                    |
|--------------------|--------------------|--------------------|
| 0.4403442194925138 | 0.7501492313143295 | 0.6432678309220012 |
| 0.2017481261464789 | 0.7495590881804389 | 0.6566514654250891 |
| 0.2719785430348975 | 0.7503745651391248 | 0.0545986190488210 |
| 0.1088645193664444 | 0.7495775783802531 | 0.0522950484553711 |
| 0.0609453627571186 | 0.2491862512502602 | 0.1405940486801041 |
| 0.3044012446966548 | 0.2493621867486794 | 0.1585995494275110 |
| 0.2270623730258086 | 0.2503584206595098 | 0.5534839267049557 |
| 0.3917701993638908 | 0.2490264380118939 | 0.5508207064231990 |
| 0.5610720975079045 | 0.2497240889948536 | 0.3550635447727816 |
| 0.8069026655807222 | 0.2519104143241924 | 0.3572730974070330 |
| 0.7295057877408516 | 0.2486782225348813 | 0.9730523178757197 |
| 0.8938604428144495 | 0.2549888551823161 | 0.9509860335585008 |
| 0.9176687798237647 | 0.7561142603773380 | 0.8870990051859616 |
| 0.6901639085528987 | 0.7442882807657649 | 0.8614162974868681 |
| 0.7741669383623254 | 0.7494859951146755 | 0.4706162682342885 |
| 0.6015335735832393 | 0.7504488967896957 | 0.4530938214639897 |
| 0.7975245184467412 | 0.6719618244363809 | 0.0654564744108777 |
| 0.7010927170486954 | 0.7555168234517895 | 0.1393063456168963 |
| 0.8124541354109571 | 0.8000864565023050 | 0.0134278251462754 |
| 0.9184610494556789 | 0.6753316942116414 | 0.8251551748113264 |
| 0.6780524725313328 | 0.8286939868795662 | 0.8266507249154373 |
| 0.7078097974348172 | 0.6852699285051053 | 0.0600857529715444 |
| 0.7255071048320418 | 0.8125980586660092 | 0.0449670758735192 |
| 0.8509161374491621 | 0.7214887394132115 | 0.9875429366182881 |
| 0.8724122247613085 | 0.7525894209996653 | 0.2405642359092360 |
| 0.8869164739018380 | 0.7044641627645001 | 0.2070988380349696 |
| 0.8926106610047652 | 0.7943335127097292 | 0.1963786201147831 |
| 0.8177954083000002 | 0.7558235714911290 | 0.2412141337886085 |
| 0.8914561903123422 | 0.7554219232954057 | 0.3171879505126763 |

**Figure S3 Zn/ZSM-5**

1.0000000000000000

20.0219993591000005 0.0000000000000000 0.0000000000000000

0.0000000000000000 19.8990001678000006 0.0000000000000000

0.0000000000000000 0.0000000000000000 13.3830003737999998

Si O Al Zn C H

94 193 2 2 1 4

**Direct**

0.4218186602566483 0.0599765837453815 0.6483216376438793

0.3045098407176811 0.0316041740610530 0.7921584561884162

0.2816092984760112 0.0571455974861769 0.0168266121053747

0.1216984391702727 0.0641716913584923 0.0118705092302155

0.0672759849947027 0.0309570096465680 0.8004621133454539

0.1800169218185337 0.0641266608096812 0.6642833501239035

0.4184374587658655 0.8273684480357085 0.6692939635693143

0.3009863083629723 0.8728496697282359 0.8022135701270008

0.2669233467132521 0.8305941574840643 0.0211194616427317

0.1111550922781760 0.8263008756285022 0.0140138964539082

0.0656763473284197 0.8737352614645392 0.7998728938205825

0.1793098979072175 0.8287963753029006 0.6664870174770315

0.0756779556501185 0.9416012217208649 0.1486680320217622

0.1941868545115464 0.9701904163859744 0.2911830586290219

0.2166685091549052 0.9429608047653113 0.5161636441790397

0.3769358102533380 0.9352825943117258 0.5135453095368279

**Structure files (CONTCAR) involved in this work:**

|                    |                    |                    |
|--------------------|--------------------|--------------------|
| 0.4329991178338163 | 0.9689019501462639 | 0.3015596570070841 |
| 0.3194176544011040 | 0.9362324373030165 | 0.1644409726474330 |
| 0.0805924211563433 | 0.1738916081595001 | 0.1666709525874735 |
| 0.1972239736037142 | 0.1292316106065660 | 0.3015660516686485 |
| 0.2310972049594215 | 0.1697302544582064 | 0.5194813184215701 |
| 0.3864156939523221 | 0.1737950099437527 | 0.5092510138574652 |
| 0.4348494698593821 | 0.1273408848832860 | 0.2962900129375161 |
| 0.3185846957233144 | 0.1723749127638062 | 0.1667348161229552 |
| 0.5775054869824235 | 0.5558362808398902 | 0.3551589514070135 |
| 0.6911218250733041 | 0.5277425559219380 | 0.2026261228410793 |
| 0.7152637914808595 | 0.5679648479290031 | 0.9863039535253645 |
| 0.8748207243440888 | 0.5695023050687067 | 0.9876644864214245 |
| 0.9255958490100445 | 0.5280814540849544 | 0.1953800001737369 |
| 0.8130970988530976 | 0.5537017592508607 | 0.3420558319186247 |
| 0.5736937386479580 | 0.3292234684695057 | 0.3322678050835507 |
| 0.6954018629928083 | 0.3732302177040723 | 0.1954664897737745 |
| 0.7320337497964845 | 0.3278198782466991 | 0.9787958033421839 |
| 0.8865167833262791 | 0.3257904953715387 | 0.9839894256445418 |
| 0.9395919155537096 | 0.3720966238526420 | 0.1892518752525577 |
| 0.9209712795037864 | 0.4452250566750044 | 0.8561945226029670 |
| 0.7994560887795126 | 0.4742686285729383 | 0.7184515131385206 |
| 0.7808474276271752 | 0.4376737119114161 | 0.4926884329654861 |
| 0.6231252179621396 | 0.4295115542031593 | 0.4883235995026947 |
| 0.5710176053348196 | 0.4695047983509038 | 0.6996680134699363 |
| 0.6753566705362396 | 0.4468819320329809 | 0.8566854813309591 |
| 0.9213544886983107 | 0.6770413091000772 | 0.8356354123596391 |
| 0.7678688795994902 | 0.6708248433034623 | 0.4661653745958485 |
| 0.6132051670007631 | 0.6734149445160735 | 0.4879650155909489 |
| 0.5600955692308818 | 0.6276268371290011 | 0.6980754685845524 |
| 0.6705992221457083 | 0.6752393691490776 | 0.8285363088181121 |
| 0.5773510470922627 | 0.9453802558236336 | 0.3580102451233241 |
| 0.6977043803580567 | 0.9745773163324694 | 0.2152141818725288 |
| 0.7190827825450290 | 0.9396184633735993 | 0.9932687828405018 |
| 0.8788043207021171 | 0.9351726102652790 | 0.9947298252829985 |
| 0.9309624684484120 | 0.9720127370943801 | 0.2048836966980963 |
| 0.8218097916451123 | 0.9464455600094366 | 0.3538329034752411 |
| 0.5779993249182674 | 0.1743050878164580 | 0.3294894057139346 |
| 0.6971036145968965 | 0.1325863711972431 | 0.1933842661315454 |
| 0.7324198053139656 | 0.1712418054636936 | 0.9720997530485758 |
| 0.8869683624513046 | 0.1731058670000284 | 0.9828050218831722 |
| 0.9348057476178442 | 0.1305216205759447 | 0.1982077189324407 |
| 0.8185937154930053 | 0.1739849686883239 | 0.3324468001221187 |
| 0.9230758235828611 | 0.0541405820479787 | 0.8553990042734587 |
| 0.8015905936935550 | 0.0253872656063438 | 0.7109090401282960 |
| 0.7807603091714806 | 0.0644548175899406 | 0.4924459397453928 |
| 0.6205280023947116 | 0.0697257217052320 | 0.4899182910581839 |
| 0.5671670812516012 | 0.0329086634601614 | 0.6986380666519084 |
| 0.6778755696293043 | 0.0543874259690564 | 0.8489200746386955 |
| 0.9225232738689781 | 0.8295793410396886 | 0.8385135821483093 |
| 0.8029947902268353 | 0.8674516558663958 | 0.6958626773551614 |
| 0.7686578657006451 | 0.8280014982266246 | 0.4774150341091632 |
| 0.6139999220284754 | 0.8273027908041843 | 0.4901722906820191 |
| 0.5631334641605286 | 0.8758122704436307 | 0.6978884643308433 |

**Structure files (CONTCAR) involved in this work:**

|                    |                    |                    |
|--------------------|--------------------|--------------------|
| 0.6779208875358781 | 0.8332893140743564 | 0.8338394781662317 |
| 0.4238659644089639 | 0.4421574461298270 | 0.6428769399770962 |
| 0.3061703830504964 | 0.4694088962808916 | 0.7879163130125788 |
| 0.2809345147670015 | 0.4447605819096888 | 0.0123996967293529 |
| 0.1232255170498668 | 0.4363565598105967 | 0.0113589389916410 |
| 0.0649817808283197 | 0.4703922961277769 | 0.8016932038051318 |
| 0.1783091286449881 | 0.4368720509450779 | 0.6629135417033618 |
| 0.4149918784418186 | 0.6735814814512818 | 0.6666490740492806 |
| 0.3003516084628786 | 0.6278220618041612 | 0.8009125550726794 |
| 0.2669899113344767 | 0.6692913126362211 | 0.0201209629563153 |
| 0.1115432012183080 | 0.6725580306404322 | 0.0108520251502908 |
| 0.0642427870172900 | 0.6289255028754605 | 0.7967639861081734 |
| 0.1793711922732299 | 0.6715677779494493 | 0.6647243466133342 |
| 0.0722451694863741 | 0.5574638064994009 | 0.1473549094645404 |
| 0.1913492818421323 | 0.5307320277931619 | 0.2893616838464447 |
| 0.2148191505590205 | 0.5568631394361940 | 0.5149590767110931 |
| 0.3736255175518775 | 0.5662551700498145 | 0.5133016233418496 |
| 0.4295745558483913 | 0.5307180673215377 | 0.3046792241071903 |
| 0.3188730862732854 | 0.5634627566507028 | 0.1625602451098000 |
| 0.0849987082296918 | 0.3270080567421788 | 0.1599532432759562 |
| 0.1966052709038106 | 0.3719090422694398 | 0.3004756578295972 |
| 0.2299879583960079 | 0.3309683634622007 | 0.5194518418344745 |
| 0.3844751064897247 | 0.3274640711350486 | 0.5064369970640649 |
| 0.4301789464154296 | 0.3736879345253175 | 0.2947124580024558 |
| 0.3164077159589819 | 0.3300762904082334 | 0.1627285407597893 |
| 0.3579571664824635 | 0.0702637466167305 | 0.7215194727740466 |
| 0.3156895482387854 | 0.0547412277873973 | 0.9068830085230333 |
| 0.2012626574472204 | 0.0499265376801638 | 0.0078128327857451 |
| 0.0916800226160384 | 0.0703313556889413 | 0.9000703967495776 |
| 0.1032820750422190 | 0.0633800889279629 | 0.7030384461925753 |
| 0.2287817686101385 | 0.0509287727814671 | 0.7595984152403938 |
| 0.3596293741900451 | 0.8278230629361752 | 0.7527263530365785 |
| 0.3013236591215753 | 0.8614828742063839 | 0.9216390643803084 |
| 0.1883653201089810 | 0.8512253365577028 | 0.0235581346492809 |
| 0.0880962253870437 | 0.8319188266132612 | 0.8983887815779291 |
| 0.1024893750657490 | 0.8411909569658853 | 0.7025481187169774 |
| 0.2285617691726173 | 0.8508184051007665 | 0.7578633763109278 |
| 0.3159446061728164 | 0.9512570690501755 | 0.7773853775245783 |
| 0.0876092472845998 | 0.9519890639242102 | 0.8113041797533274 |
| 0.4321146020274012 | 0.1275377631137700 | 0.5818284967877676 |
| 0.4121025163509053 | 0.9962414875487968 | 0.5741448034491472 |
| 0.3929292036480282 | 0.8642386788918760 | 0.5680188588373355 |
| 0.1957519494518774 | 0.1375488800435646 | 0.6171838506476195 |
| 0.1896272081484709 | 0.0057416981102189 | 0.5813154312342310 |
| 0.1950550438240086 | 0.8720412192899635 | 0.5665658674740024 |
| 0.9873537311612972 | 0.0397016309633749 | 0.7847209368775545 |
| 0.9851177567675391 | 0.8687992820132250 | 0.7864625569368208 |
| 0.1399786804752313 | 0.9321462117063585 | 0.2212437591473068 |
| 0.1831369863959344 | 0.9472296109172234 | 0.4060661567407880 |
| 0.2971930874395328 | 0.9480567003914523 | 0.5084397989230436 |
| 0.4073735942975323 | 0.9311884775901015 | 0.4019067720930530 |
| 0.3958233670106160 | 0.9370588870564417 | 0.2046809043681839 |
| 0.2696550539631429 | 0.9498133261174326 | 0.2585385686613546 |

**Structure files (CONTCAR) involved in this work:**

|                    |                    |                    |
|--------------------|--------------------|--------------------|
| 0.1394460955361430 | 0.1741780554441120 | 0.2500176031474624 |
| 0.1938812073887313 | 0.1406342292156954 | 0.4210351561304472 |
| 0.3093492802715541 | 0.1479148823938138 | 0.5154178963602367 |
| 0.4128258488969966 | 0.1688700878352223 | 0.3952840826809507 |
| 0.3956156315000006 | 0.1584852370538544 | 0.2001653109429149 |
| 0.2703721156092989 | 0.1518822514218439 | 0.2603428901802701 |
| 0.1836066738785718 | 0.0506282064530785 | 0.2761149282790505 |
| 0.4155390732127460 | 0.0486036369565232 | 0.3102302743024584 |
| 0.0645781236979975 | 0.8726035375263207 | 0.0854820677875953 |
| 0.0854559137126386 | 0.0028405786883421 | 0.0701023306672490 |
| 0.1060699796027055 | 0.1345437516217022 | 0.0676995213224644 |
| 0.3044074781303030 | 0.8625146145902418 | 0.1173703566537765 |
| 0.3102805731638358 | 0.9945440832624410 | 0.0810346480649984 |
| 0.3006297446832598 | 0.1283615012419493 | 0.0683919244602601 |
| 0.5125843916924504 | 0.9566873437797291 | 0.2870220744420689 |
| 0.5148959954988175 | 0.1348545684794319 | 0.2793392389525499 |
| 0.6374342375782934 | 0.5639736110809069 | 0.2750150332209497 |
| 0.6997109951564953 | 0.5748315630607382 | 0.1047986531413591 |
| 0.7953271577959719 | 0.5607243653543683 | 0.9661763986725247 |
| 0.8895843421005816 | 0.5715948704900892 | 0.1074540105362182 |
| 0.8890132493051138 | 0.5427478677172514 | 0.3032006067714854 |
| 0.7626716548771711 | 0.5250071934024606 | 0.2603193407900411 |
| 0.6379010865812508 | 0.3357555867645203 | 0.2606208918241031 |
| 0.6973646008826714 | 0.3359421903118729 | 0.0871275397670258 |
| 0.8096795226750679 | 0.3529297563865658 | 0.9824664587636813 |
| 0.9142831134712743 | 0.3254706925697300 | 0.0973073384370846 |
| 0.9066939021821049 | 0.3465127656761557 | 0.2918464260010016 |
| 0.7662600656753753 | 0.3707984774371159 | 0.2505754232202060 |
| 0.6707000893073605 | 0.4511202277882319 | 0.1765847909812564 |
| 0.9181230901200224 | 0.4496966803994274 | 0.1658825836087792 |
| 0.5684325864387588 | 0.6264318821266426 | 0.4147561589750800 |
| 0.5947736472144668 | 0.4974027224054451 | 0.4362097384115650 |
| 0.5875468638110100 | 0.3638971873278439 | 0.4409831203917242 |
| 0.8007928499194880 | 0.6321038253752705 | 0.3703781796937402 |
| 0.8020219611379591 | 0.5144300852886965 | 0.4515291392611996 |
| 0.8330564138083207 | 0.3856724142781776 | 0.4404987851012505 |
| 0.0034439662758264 | 0.5487432277882379 | 0.2107447222316908 |
| 0.0205405186023230 | 0.3694334431401881 | 0.1966662186291091 |
| 0.8556178150090602 | 0.4373829743482563 | 0.7852224581841126 |
| 0.7940649779108018 | 0.4356901828357856 | 0.6115078832880901 |
| 0.7035930926323931 | 0.4237686405967768 | 0.4661279199827925 |
| 0.6091056487150728 | 0.4315664983211111 | 0.6075176871198827 |
| 0.6021003655236651 | 0.4447425739195945 | 0.8054617001458239 |
| 0.7277029226353839 | 0.4729489953729851 | 0.7719038081027857 |
| 0.8594540517354503 | 0.6791831613296379 | 0.7606526688285631 |
| 0.8125062738847937 | 0.6484823029704098 | 0.5650315255763557 |
| 0.6910120354084444 | 0.6473553893362687 | 0.4842893676218954 |
| 0.5852081364327083 | 0.6694707126417319 | 0.6008624756974250 |
| 0.5926556389268843 | 0.6603451642966907 | 0.7982086236025134 |
| 0.7172583213359297 | 0.6532925899646131 | 0.7359015834429519 |
| 0.8212946035972749 | 0.5517706016004262 | 0.6947069519577485 |
| 0.5823050409240421 | 0.5496592884961565 | 0.6848217493555255 |
| 0.9322789539352071 | 0.3746887336772463 | 0.9145878051214592 |

**Structure files (CONTCAR) involved in this work:**

|                    |                    |                    |
|--------------------|--------------------|--------------------|
| 0.9131181950967002 | 0.5058647386032125 | 0.9366883685156998 |
| 0.9028777244923100 | 0.6388210117430314 | 0.9402818022322694 |
| 0.6932108844651045 | 0.3721826111250962 | 0.8952532060568097 |
| 0.6772415198803190 | 0.5003736755394982 | 0.9480328155119269 |
| 0.6876118596961776 | 0.6341066887429904 | 0.9305581789132602 |
| 0.4924074796234832 | 0.4509901146912464 | 0.7053749898396064 |
| 0.4792494703980573 | 0.6316553984889992 | 0.7068803177283673 |
| 0.6433737065337953 | 0.9399319956454435 | 0.2886166496020173 |
| 0.6980078047862334 | 0.9341254853298098 | 0.1099132287039890 |
| 0.7993870648007139 | 0.9487388434257886 | 0.9810848467086836 |
| 0.8985686348327384 | 0.9304691171881582 | 0.1119268974944029 |
| 0.8971162448080181 | 0.9482726683728177 | 0.3093223204542853 |
| 0.7713311029321344 | 0.9691341150555185 | 0.2650438358348640 |
| 0.6396382452454167 | 0.1745394948854937 | 0.2514346433616750 |
| 0.6960014286184747 | 0.1569002306195466 | 0.0779654213977395 |
| 0.8099440282467809 | 0.1468152807523525 | 0.9794499298899700 |
| 0.9138761186415008 | 0.1700285416244785 | 0.0967246015980411 |
| 0.8953027826377079 | 0.1610267731885139 | 0.2937250544222017 |
| 0.7697018260424997 | 0.1459842382013266 | 0.2430829964199506 |
| 0.6786737916664245 | 0.0530007706556361 | 0.1986401336907508 |
| 0.9175973453192833 | 0.0512813528994460 | 0.1847161788801675 |
| 0.5687194205638556 | 0.8752352716758792 | 0.4193767585760934 |
| 0.5818716513546174 | 0.0070116450689972 | 0.4375645752285059 |
| 0.6000412705040590 | 0.1391264819065865 | 0.4341212931258400 |
| 0.8064260020929012 | 0.8704387083647908 | 0.3914168166113622 |
| 0.8155744741274727 | 0.9966852878706500 | 0.4487044469731487 |
| 0.8066193029500208 | 0.1303203875860955 | 0.4340825007624148 |
| 0.0101313784634200 | 0.9560657066226121 | 0.2161409118585522 |
| 0.0148413742170222 | 0.1392302992505304 | 0.2156629484181867 |
| 0.8566196620428321 | 0.0559026682160253 | 0.7867567335897472 |
| 0.8014666919774877 | 0.0702593070053967 | 0.6096204251846162 |
| 0.7002144916294322 | 0.0568178362076045 | 0.4808452052820564 |
| 0.5980036667811430 | 0.0761875577155906 | 0.6061507846032246 |
| 0.6028864256010847 | 0.0531403259797149 | 0.8031849529504276 |
| 0.7281914961216986 | 0.0283417584974987 | 0.7619305369648399 |
| 0.8603647151866622 | 0.8312732077880829 | 0.7612866603343652 |
| 0.8052041259261169 | 0.8344484270194951 | 0.5849941528983407 |
| 0.6914283162729631 | 0.8527272406027084 | 0.4864424363408482 |
| 0.5876218209577320 | 0.8295528158168167 | 0.6046630463451793 |
| 0.6028143115061486 | 0.8540951847939092 | 0.7986573473508005 |
| 0.7299281910405967 | 0.8544226185070223 | 0.7453022091272685 |
| 0.8184581171215906 | 0.9472513468906342 | 0.6866374303100489 |
| 0.5785147469548891 | 0.9539263921889660 | 0.6719898266235281 |
| 0.9323980251909678 | 0.1264835454727569 | 0.9100762691367709 |
| 0.9190062104478064 | 0.9964513266255096 | 0.9414655857227107 |
| 0.9003918197286763 | 0.8646832633507558 | 0.9430585815217817 |
| 0.6953757612329626 | 0.1305206205257405 | 0.8829539565058370 |
| 0.6820732416116519 | 0.0048441644165426 | 0.9453288745947509 |
| 0.6960350490029039 | 0.8712280524930461 | 0.9375260157690003 |
| 0.4883347145849325 | 0.0484716769180628 | 0.7149825328666917 |
| 0.4836119705939685 | 0.8648061160536983 | 0.7158373979366939 |
| 0.3614122298795809 | 0.4317068233407944 | 0.7190152133545431 |
| 0.3158694249768946 | 0.4459330866454645 | 0.9029408662929536 |

**Structure files (CONTCAR) involved in this work:**

0.2011043707531951 0.4578384889368218 0.0015685050493440  
0.0889993885275402 0.4320979483128504 0.9020263083206154  
0.1023184062282889 0.4376695218985012 0.7056391190325055  
0.2306433932450879 0.4500300509394778 0.7537038801156586  
0.3580823764387691 0.6747730451758422 0.7530452235264855  
0.3008019331766902 0.6381175237573208 0.9204240963988759  
0.1886098743510412 0.6477373254829236 0.0228180633372049  
0.0897235960369764 0.6698766871079599 0.8943326044257272  
0.1021274972057319 0.6581043494882806 0.6980219117278654  
0.2274242345058645 0.6485330283663939 0.7569758131183802  
0.3168972541122242 0.5499432636927931 0.7741988017987302  
0.0828291423026071 0.5498317924715002 0.8101388265898498  
0.4322072670747757 0.3761997553580145 0.5722928386379478  
0.4137362275258539 0.5080593661173903 0.5730804851300626  
0.3843030768784301 0.6386545148660381 0.5667392332600848  
0.1921587035651980 0.3633188050205881 0.6151132550996071  
0.1835634468734124 0.4956161029183337 0.5794362445739788  
0.1964433691952130 0.6289119267568078 0.5645847075136601  
0.9850834822331586 0.4601334754088921 0.7846681960806616  
0.9842208277560101 0.6378257905022783 0.7820178792890495  
0.1346196586748652 0.5684284447378327 0.2232254128583785  
0.1821455576828632 0.5543077520608416 0.4043063787533218  
0.2950532441116829 0.5469117104091742 0.5096232252073497  
0.4031570834207204 0.5720559775789780 0.4012436375236976  
0.3946416239638570 0.5620826206758873 0.2057099142530420  
0.2661645683214400 0.5506890936981156 0.2532751158875946  
0.1396439628245589 0.3256970360325973 0.2494572373296502  
0.1947236749470354 0.3598747298329605 0.4195611770257798  
0.3079674385132397 0.3537823856047562 0.5193090781394338  
0.4059334255879450 0.3289098871918811 0.3896092350954072  
0.3933619898037381 0.3468454648248286 0.1937844090830536  
0.2697277799347467 0.3511993111061898 0.2575711966414523  
0.1809346593481967 0.4502432494564476 0.2756142348085194  
0.4100765461136652 0.4516611993748329 0.3161476294245634  
0.0641534987619643 0.6235905141252334 0.0770065009393116  
0.0834804621257648 0.4917316799083293 0.0776108932289850  
0.1174807057170814 0.3623857876035130 0.0616166223945148  
0.3053351582184634 0.6373709260143677 0.1155469510854955  
0.3121679687375871 0.5050490354117259 0.0787547009239230  
0.2953350686312900 0.3721652582339101 0.0635930280393539  
0.5098537291870588 0.5385238077136032 0.2943314874362575  
0.5102431637435603 0.3662122628472657 0.2791185514930352  
0.4365278667118879 0.7501571388211840 0.6408092267139197  
0.1906304780640080 0.7502461149307036 0.6388876225331351  
0.2754128687688334 0.7498802064542173 0.0228274342443901  
0.1036110449720729 0.7489968353097415 0.0509004302401811  
0.0642516008032180 0.2505090677648371 0.1330124452714375  
0.3080039143100259 0.2508337313407547 0.1377147001110473  
0.2234574297970077 0.2503589328837319 0.5252353741487225  
0.3915786616538409 0.2510713879295228 0.5470741217285828  
0.5563845013818121 0.2510718556081720 0.3535910438469450  
0.8054767753062899 0.2513376112671971 0.3570910028214710  
0.7279448089713243 0.2501630141831065 0.9434060146602169

**Structure files (CONTCAR) involved in this work:**

0.8912171165514711 0.2497175399505546 0.9411287309305891  
0.9446542942207847 0.7530966761505460 0.8639990761412213  
0.6809211976768170 0.7538043613677935 0.8562033357216564  
0.7725641727755230 0.7498156463828363 0.4435023904423459  
0.6089385061520503 0.7505349074113767 0.4492863927741545  
0.9334971210530315 0.5039386392555419 0.5248393094479682  
0.8237671825279063 0.3333886877647955 0.3289490571204537  
0.7971583348734788 0.6385684489944946 0.6986392469811271  
0.9341740958252901 0.4077383253579222 0.4479199917056516  
0.8685856961657006 0.5654376911534420 0.5599431518263702  
0.0310960073217315 0.3994238833644052 0.4405413216831837  
0.0550111121261877 0.4194549668659359 0.5080730688172163  
1.0464023566869469 0.4302006084970610 0.3761801975624048  
0.0474563881091878 0.3475443033702754 0.4281182639840929  
0.9750439333322276 0.5050999817500402 0.5625922766920897

**Figure S3 Fe/ZSM-5**

1.0000000000000000

20.0219993591000005 0.0000000000000000 0.0000000000000000

0.0000000000000000 19.8990001678000006 0.0000000000000000

0.0000000000000000 0.0000000000000000 13.3830003737999998

Si O Al Fe C H

94 193 2 2 1 4

**Direct**

0.4237099829211577 0.0562430535919277 0.6452374954247700

0.3061061236940126 0.0279807846678354 0.7913730511605871

0.2810683940454748 0.0623220918310336 0.0120783237600889

0.1203688899883202 0.0662690784581039 0.0084613788552226

0.0675749041816884 0.0311143759260949 0.7956724881149263

0.1822628147593572 0.0570916975557993 0.6567124837310468

0.4195558302189115 0.8270897104531205 0.6649351926267673

0.3051991737418678 0.8694708063626692 0.8085222660316571

0.2684011230992461 0.8294269457081661 0.0265144979246085

0.1140091317537313 0.8266599276900261 0.0114749450812513

0.0655057499258391 0.8721464166290495 0.7983738599167862

0.1838892854476529 0.8286467390151729 0.6729974668197151

0.0793102178074361 0.9425821139506553 0.1461574705158330

0.1964588921093541 0.9703408273123307 0.2933596981621303

0.2197216021945695 0.9377536266219842 0.5125683436620854

0.3792632734682607 0.9335453376174860 0.5085460499183009

0.4347868955657374 0.9691842448180019 0.2983384884623939

0.3201752705695975 0.9434268123551409 0.1590680902936930

0.0817528313796849 0.1721199765403136 0.1680758664414995

0.1984762521261108 0.1285019847247211 0.3078682446436584

0.2352034073122431 0.1714241862395970 0.5241153455752008

0.3898487247802623 0.1730976091114663 0.5092859029964713

0.4383434052736969 0.1274933459955778 0.2977028017287012

0.3193293249445084 0.1693943484097453 0.1720358319323335

0.5781929130287836 0.5551518196549604 0.3537677551544345

0.6958714009017477 0.5273072506902924 0.2042420166049018

0.7184012822448461 0.5582309285614528 0.9872050232998389

0.8776589590954994 0.5688758789013784 0.9933835591960550

0.9347902869092333 0.5303749577346369 0.2025601162119177

0.8186684216695597 0.5562933383184637 0.3383847393686809



**Structure files (CONTCAR) involved in this work:**

|                    |                    |                    |
|--------------------|--------------------|--------------------|
| 0.5800704488800884 | 0.3279761986708533 | 0.3381663417207098 |
| 0.6995408168452245 | 0.3687211542942070 | 0.1973229362460523 |
| 0.7320750432646745 | 0.3229435299695640 | 0.9816882330387847 |
| 0.8863347947817291 | 0.3290891320466990 | 0.9954526608312377 |
| 0.9373492412460667 | 0.3723858840256961 | 0.2055112281683113 |
| 0.8207314533912177 | 0.3309941185048152 | 0.3347396898974617 |
| 0.9232538457938806 | 0.4464309796628178 | 0.8573807010444443 |
| 0.8027996502299263 | 0.4701103829777351 | 0.7146065228831801 |
| 0.7796859225803513 | 0.4387490492315095 | 0.4899541216361041 |
| 0.6185375930283689 | 0.4335293829372973 | 0.4958131035872229 |
| 0.5667849803338807 | 0.4704935333507209 | 0.7099039491430745 |
| 0.6790323466711756 | 0.4358457917203005 | 0.8486541631661840 |
| 0.7993450652153258 | 0.6295016323199144 | 0.6913103652210664 |
| 0.7669379017143270 | 0.6670083033885782 | 0.4719960763659867 |
| 0.6118575714559004 | 0.6721942785938451 | 0.4856563305571190 |
| 0.5646137277876482 | 0.6293270217876736 | 0.7033907734939689 |
| 0.6817356835969857 | 0.6714429469463430 | 0.8276565134293150 |
| 0.5795479730031657 | 0.9413410868132942 | 0.3484345161819949 |
| 0.6955481458486085 | 0.9718180466235934 | 0.2028762301978115 |
| 0.7233441626867266 | 0.9424634878165563 | 0.9819924216127809 |
| 0.8801643885354858 | 0.9442806371744469 | 0.9861816253143227 |
| 0.9359236374791503 | 0.9686355469605957 | 0.1986775079477146 |
| 0.8189495188511010 | 0.9364862100224303 | 0.3298361226359052 |
| 0.5824644513427083 | 0.1739851826101976 | 0.3246069025610321 |
| 0.6980917058169085 | 0.1303075296883864 | 0.1886357920229828 |
| 0.7382611631345103 | 0.1644211255291975 | 0.9710274839428198 |
| 0.8927729474652547 | 0.1748548259638039 | 0.9830704662814042 |
| 0.9397269015825211 | 0.1271306388056239 | 0.1979671156454376 |
| 0.8199973481536668 | 0.1731605736946763 | 0.3220390599517006 |
| 0.9243127537852689 | 0.0629685443506059 | 0.8435064233285320 |
| 0.8094015166544671 | 0.0291819080356859 | 0.6963820673765712 |
| 0.7835942021343677 | 0.0584038270772440 | 0.4763028332570614 |
| 0.6237280320195592 | 0.0661730769702526 | 0.4823386512438522 |
| 0.5678658494707762 | 0.0322646790690839 | 0.6925153667969844 |
| 0.6847950658019002 | 0.0560352725093324 | 0.8256205329006281 |
| 0.9175466287534362 | 0.8316719384601063 | 0.8285057203386347 |
| 0.8066891062592658 | 0.8717242653920129 | 0.6822695526170608 |
| 0.7692768822693407 | 0.8279077796658393 | 0.4703608810288218 |
| 0.6136838036619269 | 0.8263590695558105 | 0.4884798723613212 |
| 0.5638053764505819 | 0.8742403643237177 | 0.6994305124071072 |
| 0.4236127983003504 | 0.4424471494831910 | 0.6523953195304221 |
| 0.3061704692004846 | 0.4719611868740489 | 0.7970550661227113 |
| 0.2833022941339852 | 0.4383847090206553 | 0.0187760191218329 |
| 0.1228684391107553 | 0.4333527463537935 | 0.0156902607869235 |
| 0.0691228902162713 | 0.4676982674065566 | 0.8040735852993990 |
| 0.1822863013850238 | 0.4421292153850995 | 0.6646865315138136 |
| 0.4199411987814601 | 0.6735670106123143 | 0.6692047396958065 |
| 0.3063910269451312 | 0.6304605910271940 | 0.8120564694455362 |
| 0.2683330652560845 | 0.6704203026377018 | 0.0290333962067573 |
| 0.1141394392794031 | 0.6724553527506847 | 0.0107857871201854 |
| 0.0663202230343293 | 0.6256674057123149 | 0.7982186295458740 |
| 0.1858995993118179 | 0.6699240178262547 | 0.6741916564175533 |
| 0.0789592809049596 | 0.5580106352405320 | 0.1491643279102215 |

**Structure files (CONTCAR) involved in this work:**

|                    |                    |                    |
|--------------------|--------------------|--------------------|
| 0.1955743805392870 | 0.5289734599660444 | 0.2956246755022200 |
| 0.2212815022403494 | 0.5598866966269174 | 0.5167047846957205 |
| 0.3805186899592434 | 0.5638461253654250 | 0.5132657607040807 |
| 0.4347457169880543 | 0.5301729230273688 | 0.3014851831888506 |
| 0.3203864692238015 | 0.5583041233379097 | 0.1642629621854649 |
| 0.0815738830824694 | 0.3259588988869728 | 0.1731361587137215 |
| 0.1974503199010875 | 0.3706008626645815 | 0.3110572236381006 |
| 0.2362641502991512 | 0.3305004730876865 | 0.5288375221075723 |
| 0.3911102726226995 | 0.3267883027418603 | 0.5158653287762482 |
| 0.4381887193146642 | 0.3722606751603518 | 0.3016996237061474 |
| 0.3194528771983077 | 0.3281153789974845 | 0.1759183815489883 |
| 0.3581664567003818 | 0.0639775274126817 | 0.7156780888626993 |
| 0.3110746366747252 | 0.0644415654720771 | 0.8995324546517146 |
| 0.2004164011230808 | 0.0550532817032513 | 0.0095129471051305 |
| 0.0926751796938080 | 0.0705499103627395 | 0.8950740673743343 |
| 0.1061842629738444 | 0.0591509704785461 | 0.6978569854995430 |
| 0.2304299665980488 | 0.0356455517372145 | 0.7491787518732761 |
| 0.3595873006469606 | 0.8264478597354388 | 0.7465661999783347 |
| 0.3085265780788428 | 0.8465846286486339 | 0.9244577765803862 |
| 0.1908923981324098 | 0.8531627214747816 | 0.0147153822224507 |
| 0.0867839098393692 | 0.8311018542073876 | 0.8978970295878030 |
| 0.1059813967866997 | 0.8421497641116941 | 0.7028545627319679 |
| 0.2303934336451384 | 0.8551797990186929 | 0.7651660936744148 |
| 0.3239019802626582 | 0.9486147728486860 | 0.7994285882317087 |
| 0.0820448314459497 | 0.9513936615540588 | 0.8117767123959957 |
| 0.4337630558026749 | 0.1246741467939513 | 0.5807805677502570 |
| 0.4171574672149831 | 0.9933771029591010 | 0.5683411982785239 |
| 0.3935569575305417 | 0.8619741585339068 | 0.5621333470029304 |
| 0.2017611151728200 | 0.1312970650798134 | 0.6166202180382238 |
| 0.1865429158997459 | 0.0025951808882477 | 0.5667988232913207 |
| 0.2019670288688874 | 0.8686441065710346 | 0.5708807847520280 |
| 0.9887856199822663 | 0.0450961750148780 | 0.7753148502050612 |
| 0.9857743509860248 | 0.8619241814543308 | 0.7813140563874800 |
| 0.1456178947208887 | 0.9354567511586426 | 0.2147490603111213 |
| 0.1894649194158458 | 0.9324661617835489 | 0.4002071718225500 |
| 0.2998235175005932 | 0.9493694797134358 | 0.5085780076866451 |
| 0.4072575039902224 | 0.9286012671146336 | 0.3952506114084152 |
| 0.3968610920317103 | 0.9442104331920936 | 0.1977985294800131 |
| 0.2725884061880625 | 0.9631115411025417 | 0.2531852025567066 |
| 0.1452220939286730 | 0.1709468029500427 | 0.2427911853676967 |
| 0.1947680965727382 | 0.1549292151248603 | 0.4219778263264902 |
| 0.3124590966749793 | 0.1478592584706978 | 0.5104209086879048 |
| 0.4176838517509124 | 0.1709484716585670 | 0.3956281865823044 |
| 0.3971181620946723 | 0.1556412581441486 | 0.2014260343352708 |
| 0.2731748805548530 | 0.1401934331251821 | 0.2628476804470468 |
| 0.1783337833546643 | 0.0495793268526958 | 0.3035510399302492 |
| 0.4212574651419876 | 0.0488567973128786 | 0.3168429044796806 |
| 0.0684454646506124 | 0.8728696061039227 | 0.0847349930405141 |
| 0.0851823727341963 | 0.0040270845965381 | 0.0667107720668235 |
| 0.1009511028663818 | 0.1364199476307281 | 0.0628127912401252 |
| 0.3024742867062850 | 0.8685892839980489 | 0.1194548017912632 |
| 0.3116059301024603 | 0.9972176804090506 | 0.0688845699305835 |
| 0.3018008456504810 | 0.1316704604668711 | 0.0677737009324247 |

**Structure files (CONTCAR) involved in this work:**

|                    |                    |                    |
|--------------------|--------------------|--------------------|
| 0.5135292513046882 | 0.9536789840497278 | 0.2805920725590875 |
| 0.5178546490270531 | 0.1360896990449386 | 0.2767328793541375 |
| 0.6448182432718247 | 0.5592176234335580 | 0.2849356186790064 |
| 0.6870813431546101 | 0.5671438566559801 | 0.0986937414310169 |
| 0.7988426452380116 | 0.5508650755204786 | 0.9952637853473036 |
| 0.9067933876579747 | 0.5717533359013077 | 0.1062717318359944 |
| 0.8961966624351928 | 0.5550202977575812 | 0.3027222845897786 |
| 0.7723004678402871 | 0.5370613165679267 | 0.2425236212028987 |
| 0.6461364135449200 | 0.3323558895648395 | 0.2692116105278821 |
| 0.6950124995702337 | 0.3338112461495966 | 0.0883249141036357 |
| 0.8081531622028586 | 0.3518328863767138 | 0.9898784579780382 |
| 0.9120814882666706 | 0.3284605499282257 | 0.1104198671173603 |
| 0.8981866753702188 | 0.3465708674831783 | 0.3049976745455333 |
| 0.7741046707443966 | 0.3593771707203743 | 0.2438292670536239 |
| 0.6811384366423550 | 0.4479402574640307 | 0.1881586226597833 |
| 0.9212834165649989 | 0.4509777342907490 | 0.1831818488069173 |
| 0.5669532599587235 | 0.6262258237473949 | 0.4111313664312968 |
| 0.5839590898817103 | 0.4956929280963960 | 0.4365192597785888 |
| 0.5953548820659792 | 0.3629558106211143 | 0.4455815792483423 |
| 0.8008442264099178 | 0.6321884551367379 | 0.3743477646525351 |
| 0.8078804790257078 | 0.5029492279149120 | 0.4282203727187493 |
| 0.8029575094736678 | 0.3686121272646749 | 0.4388797816817496 |
| 0.0135467603324630 | 0.5461535986639456 | 0.2189005308084342 |
| 0.0170417421217965 | 0.3629636369539684 | 0.2227692601316521 |
| 0.8589839726071499 | 0.4355471236298357 | 0.7854361778368031 |
| 0.8101507491944339 | 0.4411650533350093 | 0.6019641401927964 |
| 0.6988575173346604 | 0.4425453996949009 | 0.4908752953857776 |
| 0.5937322635323001 | 0.4324756000165124 | 0.6105491858897313 |
| 0.6028778976208132 | 0.4393941818187469 | 0.8080998085157344 |
| 0.7289096925391850 | 0.4507554055210348 | 0.7555903384769183 |
| 0.8531488998558059 | 0.6757424303026929 | 0.7447715603055363 |
| 0.8035255363224093 | 0.6385164025067180 | 0.5708316882741332 |
| 0.6886136645608401 | 0.6461178929337195 | 0.4777913578391931 |
| 0.5860056072233487 | 0.6654901930737066 | 0.5997358544775395 |
| 0.6031376420808136 | 0.6655920806419617 | 0.7969103078845008 |
| 0.7239180071367136 | 0.6501040296252368 | 0.7288573557026555 |
| 0.8124461961824618 | 0.5507347365182461 | 0.7188676584482925 |
| 0.5842208118026782 | 0.5501177457198602 | 0.7005353278687141 |
| 0.9306904986844180 | 0.3813811447525102 | 0.9302945966849075 |
| 0.9166390608889786 | 0.5139876285133432 | 0.9258053639976822 |
| 0.8894733102672362 | 0.6437779781832508 | 0.9456508381868403 |
| 0.6922160263003703 | 0.3615659907886803 | 0.8936265756409971 |
| 0.6886630608701061 | 0.4907210967326040 | 0.9372819404761192 |
| 0.6990047636173710 | 0.6241996640770524 | 0.9230660819983003 |
| 0.4873037814358290 | 0.4573507830331855 | 0.7240792772718353 |
| 0.4845907221306084 | 0.6367345848355188 | 0.7187143031022044 |
| 0.6437344733049941 | 0.9321848510244943 | 0.2749722981200296 |
| 0.6847056300117471 | 0.9464591878566929 | 0.0887021474390348 |
| 0.8015171804615429 | 0.9619580212591855 | 0.9973967082970111 |
| 0.9133516566743791 | 0.9324152765311752 | 0.0949472174796646 |
| 0.8960983398481829 | 0.9358743005522047 | 0.2923384514208536 |
| 0.7719950222502455 | 0.9544797446765474 | 0.2341483153055777 |
| 0.6407396807625220 | 0.1763193175450647 | 0.2399032696498569 |

**Structure files (CONTCAR) involved in this work:**

|                    |                    |                    |
|--------------------|--------------------|--------------------|
| 0.6964087363500776 | 0.1402895512882159 | 0.0686383117608007 |
| 0.8167627454827929 | 0.1453621769986042 | 0.9851837767925281 |
| 0.9249178379727641 | 0.1649505488363292 | 0.0930013808792027 |
| 0.8971839065686429 | 0.1621425915299564 | 0.2874951561501541 |
| 0.7715191101582730 | 0.1527312557259614 | 0.2288612349843858 |
| 0.6827183475110529 | 0.0520972995799999 | 0.2156382963992347 |
| 0.9190936611310849 | 0.0483854097863172 | 0.1903581401185434 |
| 0.5699289022228081 | 0.8733796576605423 | 0.4138536752943560 |
| 0.5883239913661252 | 0.0046508829152129 | 0.4233799700567438 |
| 0.6095083755834120 | 0.1361327051016560 | 0.4239998457632008 |
| 0.7996883292800356 | 0.8617695833319429 | 0.3693632787272429 |
| 0.8100941027372547 | 0.9925571881552373 | 0.4167459776430315 |
| 0.8031129588628334 | 0.1272940124297487 | 0.4186820104691210 |
| 0.0149572116551904 | 0.9553340481429387 | 0.2176650230302956 |
| 0.0191334714630834 | 0.1340919756388924 | 0.2220187590060007 |
| 0.8584618709534432 | 0.0683747375002818 | 0.7735271522671413 |
| 0.8191647306893532 | 0.0601771397306088 | 0.5852128829962787 |
| 0.7033572960929908 | 0.0526052762129338 | 0.4885456016686645 |
| 0.5917737594351283 | 0.0725489906933217 | 0.5928876730214203 |
| 0.6081228332273566 | 0.0618237189538160 | 0.7884035887465044 |
| 0.7320755671347450 | 0.0397690702649952 | 0.7299020936958432 |
| 0.8627623382901225 | 0.8273239425042285 | 0.7408415657430302 |
| 0.8131878753472834 | 0.8545806564361644 | 0.5637908625393661 |
| 0.6915491278505491 | 0.8500808023220976 | 0.4831157886406002 |
| 0.5862793238007424 | 0.8304570928473706 | 0.6016353839954077 |
| 0.6010568772271226 | 0.8475277070213580 | 0.7980829113679462 |
| 0.7331779785646978 | 0.8552659828921381 | 0.7220723479890016 |
| 0.8281435294054393 | 0.9500757757710279 | 0.6998471881894300 |
| 0.5821310433828079 | 0.9528050658405763 | 0.6765889107371961 |
| 0.9358169646685490 | 0.1345007081534684 | 0.8995207247550552 |
| 0.9173022395428596 | 0.0053267390433871 | 0.9292637574649446 |
| 0.8898592166170624 | 0.8748313311623260 | 0.9237580557712041 |
| 0.7076256033977739 | 0.1267949286500407 | 0.8744836269173424 |
| 0.6888920901439017 | 0.9951222861173294 | 0.9061291560387907 |
| 0.7174551919255181 | 0.8665949006477784 | 0.9357725936620558 |
| 0.4891653380725188 | 0.0458560557310264 | 0.7147181408562442 |
| 0.4828767454441601 | 0.8670983137163958 | 0.7115013730720977 |
| 0.3570139558096727 | 0.4349436951296060 | 0.7205449712233170 |
| 0.3129726782026367 | 0.4371030280194269 | 0.9060371305282651 |
| 0.2027324746276763 | 0.4461335056040972 | 0.0176871785445696 |
| 0.0960962376994350 | 0.4276795064874117 | 0.9020690984929295 |
| 0.1058585859176119 | 0.4387709119544097 | 0.7046537943325266 |
| 0.2298234394004317 | 0.4634283559391343 | 0.7582003088448930 |
| 0.3610795438221814 | 0.6745605948844658 | 0.7521906705610300 |
| 0.3095618969998485 | 0.6514738123784324 | 0.9286878170071700 |
| 0.1911003381889599 | 0.6462724847708418 | 0.0166920657050693 |
| 0.0882713800224824 | 0.6688515737023273 | 0.8967998294963759 |
| 0.1088217750230117 | 0.6535249840273304 | 0.7024744915418517 |
| 0.2322648101860073 | 0.6458475035257345 | 0.7679598188228074 |
| 0.3249093521876784 | 0.5513632483468779 | 0.8005060105624563 |
| 0.0853364305394223 | 0.5470375810565296 | 0.8182017786765460 |
| 0.4349764542135157 | 0.3724164001728001 | 0.5920805571991306 |
| 0.4179117784645464 | 0.5032956116681863 | 0.5719833160644376 |

**Structure files (CONTCAR) involved in this work:**

|                    |                    |                    |
|--------------------|--------------------|--------------------|
| 0.3945019147484151 | 0.6346514508574006 | 0.5694399543697868 |
| 0.2032917722390045 | 0.3684693574038316 | 0.6237086167248870 |
| 0.1876019474951357 | 0.4974057281063106 | 0.5759517271371559 |
| 0.2070015597396077 | 0.6307180528299409 | 0.5724881177974159 |
| 0.9897315462017723 | 0.4537519389995375 | 0.7893938556200282 |
| 0.9882393631501418 | 0.6353414947135325 | 0.7783197464939695 |
| 0.1440986137849359 | 0.5663803859217302 | 0.2202706540139512 |
| 0.1886549867010580 | 0.5624302568606802 | 0.4056320908370059 |
| 0.3012720555012841 | 0.5473246831295313 | 0.5095316905938035 |
| 0.4105837928875409 | 0.5697047678760909 | 0.4012961703650063 |
| 0.3967854475088362 | 0.5601385162379138 | 0.2042456596549851 |
| 0.2719332683147370 | 0.5383746537841878 | 0.2572306529843368 |
| 0.1419706230218788 | 0.3255895145240034 | 0.2538665187331234 |
| 0.1959512799868411 | 0.3513167875297443 | 0.4283697982668937 |
| 0.3140184229438943 | 0.3529553558461153 | 0.5165718688176916 |
| 0.4202920683828477 | 0.3319886005877284 | 0.4034305569709915 |
| 0.3969984961474067 | 0.3396490947347168 | 0.2086997459480424 |
| 0.2714874705025129 | 0.3554238346186058 | 0.2658448207775851 |
| 0.1778355433776793 | 0.4492451596196044 | 0.2970297971657035 |
| 0.4178106487823913 | 0.4506934015440388 | 0.3144296941902640 |
| 0.0683760166164545 | 0.6263770827019415 | 0.0843077832177920 |
| 0.0860413981275069 | 0.4951323849215573 | 0.0726129103645990 |
| 0.1049663947980389 | 0.3632349328531688 | 0.0712146580536617 |
| 0.3016725673120909 | 0.6325518687444724 | 0.1236403204934594 |
| 0.3145632559163695 | 0.5031233397607799 | 0.0755444408149736 |
| 0.3042414895799325 | 0.3686163992161168 | 0.0731387298334460 |
| 0.5141596410323723 | 0.5412411233782365 | 0.2825763364456306 |
| 0.5180629806667147 | 0.3648898771796532 | 0.2809865807843295 |
| 0.4389732137980292 | 0.7499115453702019 | 0.6383294803940840 |
| 0.1962585370827509 | 0.7494645740617097 | 0.6530131109022147 |
| 0.2721484486634661 | 0.7500932393121240 | 0.0507008242896545 |
| 0.1084213163342746 | 0.7495917189599742 | 0.0497485672893293 |
| 0.0621177243586153 | 0.2494074843142510 | 0.1442288604362564 |
| 0.3057874287127347 | 0.2489857230799759 | 0.1559245686319978 |
| 0.2308495082480048 | 0.2506704198096048 | 0.5491309152096826 |
| 0.3955703326217696 | 0.2491757916118242 | 0.5519331341508268 |
| 0.5622516851240650 | 0.2497139711163410 | 0.3572196202420206 |
| 0.8084454855925917 | 0.2512870839630055 | 0.3517649782820615 |
| 0.7313629987517202 | 0.2442866764722036 | 0.9530832820837297 |
| 0.8945503438590994 | 0.2535525350734095 | 0.9516600315919116 |
| 0.9277356124030564 | 0.7565903763009544 | 0.8770234121533765 |
| 0.6999077455684616 | 0.7479224703797599 | 0.8657149012214527 |
| 0.7755399056835882 | 0.7472286826339829 | 0.4588452954263907 |
| 0.6065409033728497 | 0.7494925950202901 | 0.4490173101617654 |
| 0.8123830569364392 | 0.7761624229607308 | 0.0993304275984838 |
| 0.9189227888375590 | 0.6735678623259088 | 0.8256832613874103 |
| 0.6841171534078976 | 0.8324638946486115 | 0.8220090295441859 |
| 0.8671056872210983 | 0.7384211709067243 | 0.9988151768809276 |
| 0.7482720552550283 | 0.7730272879198899 | 0.9949127480830409 |
| 0.6771674110788597 | 0.7534615776626121 | 0.0925141386049328 |
| 0.6305309239241004 | 0.7542332120708087 | 0.0491843084974410 |
| 0.6783136661086818 | 0.7941903694824882 | 0.1481673487962775 |
| 0.6853209994157190 | 0.7038559774990945 | 0.1265657883625737 |

**Structure files (CONTCAR) involved in this work:**

0.8030927476483890 0.7531963113984459 0.1623845227021578

**Figure S3 Ga/ZSM-5**

1.0000000000000000

20.0219993591000005 0.0000000000000000 0.0000000000000000

0.0000000000000000 19.8990001678000006 0.0000000000000000

0.0000000000000000 0.0000000000000000 13.3830003737999998

Si O Al Ga H C

94 192 2 1 5 1

**Direct**

0.4216212035856611 0.0584469494234572 0.6500332543469400

0.3050277053059343 0.0294673743362070 0.7958225349237723

0.2807623109693781 0.0570904467633419 0.0184879231793704

0.1207365767478460 0.0632610419700768 0.0127236279895623

0.0661603102828918 0.0290867200070559 0.7999153911826430

0.1809707713340458 0.0602132587271357 0.6652756655958616

0.4205273774754312 0.8272627650256664 0.6735267502852170

0.3030350079154732 0.8705045004521051 0.8092667790379515

0.2668509897097804 0.8296818640676655 0.0277461667954791

0.1119870447803155 0.8269476297210292 0.0174353310646653

0.0632576427288355 0.8704569615078834 0.8024030522125222

0.1810017921262363 0.8266317048714165 0.6751656457966173

0.0765518957730406 0.9418201542217580 0.1530615806763055

0.1942615570908398 0.9700196139716464 0.2976241161467255

0.2176545145515547 0.9384978624501910 0.5199649507655653

0.3781872172586346 0.9330428042097485 0.5158974495733870

0.4334571635063585 0.9677930198275936 0.3040851591070702

0.3187481321680717 0.9381138608617864 0.1672671069792485

0.0810029949110970 0.1734322961483403 0.1660002021549753

0.1961175551651132 0.1295368442724669 0.3075091716939712

0.2317744169435574 0.1704422020383395 0.5245818716804650

0.3867057890297003 0.1730809371531737 0.5106101187065052

0.4370714725770355 0.1263790569696547 0.2993808741626008

0.3182635534937890 0.1689798527737418 0.1728905437862168

0.5826678419312959 0.5549553155601055 0.3484974127210457

0.6931572442093866 0.5316509684324994 0.1884214604811261

0.7171084554683805 0.5651870660252015 0.9733616022031575

0.8747047631581418 0.5643812138789638 0.9830599259421150

0.9307940475941721 0.5312093928527230 0.1924689234748590

0.8144907603822398 0.5585651231811020 0.3268546242110962

0.5757869793052228 0.3291341991351276 0.3272371458567473

0.6985648752743085 0.3757177489954434 0.1976975071235151

0.7339313188453378 0.3272422197363658 0.9814194651650789

0.8862783355733560 0.3262957757868989 0.9778650487570655

0.9364229356180870 0.3731610624010629 0.1894588886795763

0.9297004434382283 0.4427000830041337 0.8515628358605665

0.7846069677132622 0.4405697403917083 0.4841374765421436

0.6254098009179514 0.4296371837899891 0.4873253409479510

0.5686959530713159 0.4677286523516674 0.6995802242206016

0.6736228932116728 0.4373305789404896 0.8489261464479679

0.9186428571682015 0.6726775872809282 0.8268356467041310

0.8015036477333451 0.6357218951655349 0.6902146311027885

0.7659931566214752 0.6664806778543086 0.4714132540717454

0.6110661507936732 0.6709528670221636 0.4854184521030311

**Structure files (CONTCAR) involved in this work:**

|                    |                    |                    |
|--------------------|--------------------|--------------------|
| 0.5646828770323437 | 0.6259929253800839 | 0.7013365154873779 |
| 0.6833425973084920 | 0.6802287615889968 | 0.8206947133629952 |
| 0.5773415318833832 | 0.9428057259962049 | 0.3585111730482052 |
| 0.6947701632402637 | 0.9713217343216116 | 0.2132504384256456 |
| 0.7206351304177454 | 0.9420603541743335 | 0.9919719628347102 |
| 0.8802743534546074 | 0.9338820154768955 | 0.9935771865595109 |
| 0.9323629081976683 | 0.9697657329563016 | 0.2046605807823030 |
| 0.8190918350726522 | 0.9413640571594069 | 0.3483566916842161 |
| 0.5808518107040491 | 0.1738253676509048 | 0.3277333800650902 |
| 0.6963563795467854 | 0.1279960991907569 | 0.1901485972798925 |
| 0.7331930221587564 | 0.1699820977064089 | 0.9712868335125346 |
| 0.8879020523103459 | 0.1724571971422375 | 0.9854054853526043 |
| 0.9359990547849132 | 0.1283246160017584 | 0.1987971689218549 |
| 0.8171673112574076 | 0.1672355201063394 | 0.3271166264461550 |
| 0.9233719359234648 | 0.0546932329089861 | 0.8550994763046391 |
| 0.8044905191529321 | 0.0264523633110973 | 0.7106639828300549 |
| 0.7809879228760050 | 0.0595661272428529 | 0.4907462374721177 |
| 0.6207075119657406 | 0.0685182934030561 | 0.4893387125284748 |
| 0.5668672692624628 | 0.0330882953024408 | 0.6980615688682432 |
| 0.6800243259860820 | 0.0561971327297861 | 0.8439999966542860 |
| 0.9189205878827628 | 0.8257074992152568 | 0.8368887800281841 |
| 0.8037339180635481 | 0.8690550787885613 | 0.6936197052463239 |
| 0.7679657825406376 | 0.8262312225298603 | 0.4769033881941872 |
| 0.6130943284012391 | 0.8255872343642641 | 0.4931666747384770 |
| 0.5635636628528695 | 0.8765182747632522 | 0.6999153754192371 |
| 0.6803176769824794 | 0.8363982041397471 | 0.8304878161560019 |
| 0.4211198381098679 | 0.4416602520641938 | 0.6446645070500441 |
| 0.3096902698809830 | 0.4680324530859425 | 0.7966927565048642 |
| 0.2849376472842502 | 0.4407488106159858 | 0.0196926977441118 |
| 0.1283420235103584 | 0.4359361956459173 | 0.0123745718604566 |
| 0.0764614894980074 | 0.4730617708485709 | 0.8047354211038561 |
| 0.1868070948362295 | 0.4431518677179964 | 0.6618746363323396 |
| 0.4227817754901115 | 0.6731825197078866 | 0.6719658397017972 |
| 0.3039201760352463 | 0.6263415376241737 | 0.8029675478901037 |
| 0.2672424247303173 | 0.6693443350126244 | 0.0224863579641376 |
| 0.1128186209382681 | 0.6740282670082897 | 0.0134158838925519 |
| 0.0654072778600292 | 0.6295141263867171 | 0.8041601291016574 |
| 0.1804488981709182 | 0.6685963236681803 | 0.6688094248802794 |
| 0.0761014338519495 | 0.5560302244191982 | 0.1441226218870263 |
| 0.1950172107602106 | 0.5281431410917958 | 0.2887407324951403 |
| 0.2199932283303038 | 0.5632858095403680 | 0.5094942756498416 |
| 0.3801571321274187 | 0.5700509017829591 | 0.5104237137758169 |
| 0.4356917871346844 | 0.5294295700794324 | 0.3025870105504581 |
| 0.3234776739934925 | 0.5597162082516594 | 0.1629440750357497 |
| 0.0835877931496043 | 0.3270571443523458 | 0.1613266067809989 |
| 0.1950084520171042 | 0.3686999157766893 | 0.3071786490310265 |
| 0.2309560039865343 | 0.3304570957132922 | 0.5256502670872402 |
| 0.3852213968773704 | 0.3268875585865160 | 0.5088129034415113 |
| 0.4311956883791661 | 0.3728756084877561 | 0.2965574400952898 |
| 0.3153128672128231 | 0.3264490330098075 | 0.1706477197869930 |
| 0.3572284862553093 | 0.0674269730320580 | 0.7224799748252930 |
| 0.3145957066534066 | 0.0574623394041542 | 0.9084487978110700 |
| 0.2004117122783758 | 0.0493453090472566 | 0.0102175493052704 |

**Structure files (CONTCAR) involved in this work:**

|                    |                    |                    |
|--------------------|--------------------|--------------------|
| 0.0912613637514516 | 0.0668567439809124 | 0.9005024264268011 |
| 0.1041671301420389 | 0.0603802750647465 | 0.7034799231992016 |
| 0.2288843021727972 | 0.0446273295651805 | 0.7606847604592130 |
| 0.3601148575067780 | 0.8262941711554024 | 0.7543257806146748 |
| 0.3054424198352008 | 0.8542625699357564 | 0.9276246283883386 |
| 0.1890608218628193 | 0.8531022154829848 | 0.0207503089955403 |
| 0.0846194699402166 | 0.8316001878889540 | 0.9039758371011979 |
| 0.1034604973979450 | 0.8372674150523388 | 0.7086563742603736 |
| 0.2292677384920487 | 0.8516932520170485 | 0.7661148210708491 |
| 0.3193626855968320 | 0.9492163214728824 | 0.7894568275824300 |
| 0.0826430645607037 | 0.9494020576188167 | 0.8106145218533898 |
| 0.4309773753501585 | 0.1266767180617479 | 0.5847874783664004 |
| 0.4129939118732758 | 0.9950001017017936 | 0.5748765000011758 |
| 0.3957586334089589 | 0.8623770550953208 | 0.5703891910190123 |
| 0.1984073709916766 | 0.1336794397849742 | 0.6201234494870731 |
| 0.1895615637736837 | 0.0030233804131756 | 0.5802685926595592 |
| 0.1962859804621092 | 0.8687174382658017 | 0.5738970366982420 |
| 0.9869368219398704 | 0.0419417168736050 | 0.7822989967354873 |
| 0.9832427230531209 | 0.8623372880116673 | 0.7854776191698016 |
| 0.1418559509582916 | 0.9330905447237527 | 0.2236211696040150 |
| 0.1850466678289495 | 0.9396243067836393 | 0.4090389579835709 |
| 0.2981694005284295 | 0.9443008123610875 | 0.5137839404875115 |
| 0.4070302840257269 | 0.9291294919390986 | 0.4032689193967847 |
| 0.3953794688969098 | 0.9386322341487247 | 0.2062219494176806 |
| 0.2703984527392150 | 0.9558057722565638 | 0.2614475354777563 |
| 0.1412098973346825 | 0.1731178060901908 | 0.2470994908731730 |
| 0.1912149596074302 | 0.1494636433383291 | 0.4244711158365358 |
| 0.3093935319306237 | 0.1473882514258270 | 0.5125151605797585 |
| 0.4158447874519995 | 0.1688234467354447 | 0.3980129079201469 |
| 0.3958086557464256 | 0.1556205127599856 | 0.2038211460009366 |
| 0.2708980965584494 | 0.1463660096983545 | 0.2663946467605792 |
| 0.1795060888105500 | 0.0502832507300430 | 0.2937142107278410 |
| 0.4186922333472126 | 0.0477696854239351 | 0.3165358029614937 |
| 0.0660964629152221 | 0.8725638596875605 | 0.0906075499281555 |
| 0.0846145840470143 | 0.0032790699232078 | 0.0742987242604279 |
| 0.1045229403986224 | 0.1346849925979273 | 0.0653837973568205 |
| 0.3017357986222682 | 0.8637858765506605 | 0.1244979193099950 |
| 0.3101750301383697 | 0.9935173022131041 | 0.0796076596135645 |
| 0.2996278891357691 | 0.1271618431562307 | 0.0730061052672430 |
| 0.5124767673156075 | 0.9536197710296759 | 0.2875993733733438 |
| 0.5167134998861207 | 0.1349564018279370 | 0.2793332765977709 |
| 0.6429221293809838 | 0.5647813725021180 | 0.2695153646345040 |
| 0.6856558521717087 | 0.5734058549752944 | 0.0848934623919784 |
| 0.7959455674106639 | 0.5460514629076771 | 0.9844458398335911 |
| 0.9042115875253104 | 0.5727677020587399 | 0.0953944183331880 |
| 0.8923263318513972 | 0.5565484211222280 | 0.2930552626959246 |
| 0.7692034760507976 | 0.5397338529791894 | 0.2305973448861021 |
| 0.6358200982337845 | 0.3368995160617829 | 0.2481931829444186 |
| 0.7181163390036787 | 0.3322794261080627 | 0.0994830229452090 |
| 0.8102694158877770 | 0.3537806959380232 | 0.9600133064140871 |
| 0.9071536605507803 | 0.3315936064196910 | 0.0941759899518420 |
| 0.9035550375622652 | 0.3424125579180727 | 0.2891124685399880 |
| 0.7616409608872067 | 0.3776303752424622 | 0.2714900531900262 |



**Structure files (CONTCAR) involved in this work:**

|                    |                    |                    |
|--------------------|--------------------|--------------------|
| 0.6763048588482906 | 0.4526144547102747 | 0.1693120477189481 |
| 0.9167063955377789 | 0.4519759693714890 | 0.1741807015938526 |
| 0.5688175738063935 | 0.6253796298463182 | 0.4066083129883895 |
| 0.6033830740645045 | 0.4979598796934739 | 0.4303017162339838 |
| 0.5939472866887204 | 0.3642735104947118 | 0.4337434164237153 |
| 0.7964469801458082 | 0.6318995555840613 | 0.3712214972641367 |
| 0.8032559798575142 | 0.5041254666860910 | 0.4167379080295951 |
| 0.8310005897815609 | 0.3738214962171862 | 0.4426123181323576 |
| 0.0097650503113896 | 0.5452457057840547 | 0.2120494022443062 |
| 0.0174459766911496 | 0.3681332515023411 | 0.1948613337097203 |
| 0.8746759132753593 | 0.4363365139764936 | 0.7613863645516905 |
| 0.8162412084577485 | 0.4468858342765901 | 0.5950468225203984 |
| 0.7070585116869890 | 0.4218838295853434 | 0.4842081207627899 |
| 0.6006416800576232 | 0.4313314365684086 | 0.6017628262792322 |
| 0.5990307733279538 | 0.4348923140796646 | 0.8002795563302594 |
| 0.7291749379127607 | 0.4364013923794617 | 0.7626739787305304 |
| 0.8648822969182692 | 0.6765839881988174 | 0.7365683854683385 |
| 0.8072063884592837 | 0.6403958042140193 | 0.5686049586787807 |
| 0.6880995102395600 | 0.6445194252904382 | 0.4846846986945270 |
| 0.5802550689960868 | 0.6636718462162248 | 0.5964930673673217 |
| 0.6069414038614679 | 0.6602604272026218 | 0.7914071703357749 |
| 0.7312511154623959 | 0.6717989305013650 | 0.7228253369674120 |
| 0.8029249889438588 | 0.5599501167663119 | 0.7303177325413494 |
| 0.5857725860474995 | 0.5475059775922464 | 0.6922935658453613 |
| 0.9365037965182827 | 0.3716259250433179 | 0.9098138054311460 |
| 0.9134541359844764 | 0.5025097061483110 | 0.9285228007820877 |
| 0.8880633361264929 | 0.6336637253848042 | 0.9231898214135076 |
| 0.6804719822826799 | 0.3717241233115083 | 0.9203259469912736 |
| 0.6782984865027066 | 0.5055640692460711 | 0.9160134711380864 |
| 0.7091795633731864 | 0.6356540179957524 | 0.9143297906826368 |
| 0.4887975624619449 | 0.4569970263516202 | 0.7056171230497689 |
| 0.4851971199788571 | 0.6341651978709344 | 0.7248488945661062 |
| 0.6426477989857082 | 0.9344510571527556 | 0.2879001620192905 |
| 0.6932292521201819 | 0.9343257087048609 | 0.1053258333503999 |
| 0.8012001123005088 | 0.9514219849480110 | 0.9897186408506149 |
| 0.9051823317061430 | 0.9280374319494652 | 0.1083735983368873 |
| 0.8948145951689143 | 0.9446424065518555 | 0.3054198968494984 |
| 0.7696649833536593 | 0.9654870219222438 | 0.2588600318206092 |
| 0.6421838998146617 | 0.1739462648103885 | 0.2488049773192879 |
| 0.6948260946881595 | 0.1503434968871232 | 0.0738940111228727 |
| 0.8108811147503086 | 0.1465169608450258 | 0.9812163158883505 |
| 0.9142006280516305 | 0.1702085109839936 | 0.0997635015365474 |
| 0.8954327652300121 | 0.1569015953578858 | 0.2948074369229812 |
| 0.7708895838742295 | 0.1372092690494092 | 0.2363011664785819 |
| 0.6738419187822033 | 0.0497729620003438 | 0.2014771364699353 |
| 0.9191693024560069 | 0.0491073751593497 | 0.1833513762926935 |
| 0.5678269715571160 | 0.8744256017685287 | 0.4235473555046102 |
| 0.5829317451383517 | 0.0064386415336309 | 0.4342511842229023 |
| 0.6038645886778076 | 0.1382272881112614 | 0.4315483217705132 |
| 0.8025523229547724 | 0.8649345072999111 | 0.3833959796867586 |
| 0.8120319124191723 | 0.9908708922620841 | 0.4442009498506806 |
| 0.8045115786318832 | 0.1252655166250524 | 0.4296213440708296 |
| 0.0114337378036403 | 0.9553337732747826 | 0.2222011167952383 |

**Structure files (CONTCAR) involved in this work:**

|                    |                    |                    |
|--------------------|--------------------|--------------------|
| 0.0158648119792895 | 0.1383234382223913 | 0.2166797930971870 |
| 0.8562660611695870 | 0.0610288992950638 | 0.7881020441951635 |
| 0.8078334447250554 | 0.0662025186479421 | 0.6049491799289627 |
| 0.7001474476695574 | 0.0535066186195634 | 0.4883099380457528 |
| 0.5942317513049165 | 0.0764574915678999 | 0.6034108306275922 |
| 0.6043875198138604 | 0.0545800511125379 | 0.8007057702531704 |
| 0.7291080635745868 | 0.0308110086308428 | 0.7548538504453567 |
| 0.8570560882038694 | 0.8269062417824777 | 0.7591205273255580 |
| 0.8077524351903541 | 0.8428282371510464 | 0.5794370910289323 |
| 0.6905615373889057 | 0.8504296357526663 | 0.4881596306399207 |
| 0.5868647905098433 | 0.8284243280528596 | 0.6079669415131176 |
| 0.6038045605631660 | 0.8553490965909392 | 0.8005772071723394 |
| 0.7287013499398945 | 0.8576849952787712 | 0.7375364255907649 |
| 0.8242182417836382 | 0.9479080996385586 | 0.6971989366939481 |
| 0.5797528235148042 | 0.9542040928308571 | 0.6719164428972605 |
| 0.9340335428402506 | 0.1248021782841764 | 0.9153203468173750 |
| 0.9199202900137371 | 0.9935429867781924 | 0.9356529657516717 |
| 0.8969314691402027 | 0.8625059777742871 | 0.9402361659544755 |
| 0.6983544300263990 | 0.1322892563010897 | 0.8772776860538735 |
| 0.6860052017310506 | 0.0074268332957030 | 0.9410110193292852 |
| 0.7010617445526368 | 0.8745313187930464 | 0.9322238223484695 |
| 0.4880153719410212 | 0.0474076118245189 | 0.7172981259124112 |
| 0.4840037418132637 | 0.8674892570069053 | 0.7204791252888326 |
| 0.3610790867721227 | 0.4285928253963172 | 0.7238852349207343 |
| 0.3165768277124279 | 0.4377122904851670 | 0.9083601230164143 |
| 0.2058977969600041 | 0.4593764223515976 | 0.0171557770672456 |
| 0.1059152337186756 | 0.4288678556139619 | 0.8963306276406364 |
| 0.1100649350971594 | 0.4521276618629364 | 0.6988612788826304 |
| 0.2335572532355733 | 0.4561773956957690 | 0.7589422009255548 |
| 0.3588741502851919 | 0.6718251006952981 | 0.7461669655492001 |
| 0.3031240220934123 | 0.6486466263768222 | 0.9187439528152813 |
| 0.1892988793547331 | 0.6462723725891887 | 0.0180506985747499 |
| 0.0871127210467628 | 0.6756570398789506 | 0.8985201209670722 |
| 0.1036303793707384 | 0.6563662017939534 | 0.7046625345756038 |
| 0.2303305469970082 | 0.6377125095149381 | 0.7537590786269043 |
| 0.3260173280718006 | 0.5480248686250140 | 0.7936520233833350 |
| 0.0872045284902335 | 0.5523417460645507 | 0.8280678970591921 |
| 0.4323467151025859 | 0.3747031589171632 | 0.5771815496228295 |
| 0.4036073651818051 | 0.5044164795332137 | 0.5724156274208668 |
| 0.4033789365746500 | 0.6381193168774951 | 0.5665128594854235 |
| 0.1963985969392509 | 0.3671030933006720 | 0.6208433972497932 |
| 0.2029610736072161 | 0.4962135778687833 | 0.5735320458065606 |
| 0.1912608685881567 | 0.6303692124390271 | 0.5630143665746171 |
| 0.9978891089760751 | 0.4565468683802644 | 0.7904136353930123 |
| 0.9853018479722012 | 0.6338988738435447 | 0.7862592554416158 |
| 0.1412286656799395 | 0.5640082428555151 | 0.2154444321372743 |
| 0.1847005025618882 | 0.5570442251154306 | 0.4008820250333320 |
| 0.2999887131001543 | 0.5691588326167797 | 0.4972284773017717 |
| 0.4153893519814480 | 0.5706389177323404 | 0.4021608628797190 |
| 0.3987988539225515 | 0.5639983934143462 | 0.2075162835930047 |
| 0.2709347430806969 | 0.5438660452591083 | 0.2529035206126539 |
| 0.1365660848312079 | 0.3259904043745678 | 0.2531657952800457 |
| 0.190948088888756  | 0.3530643043506854 | 0.4256750214636833 |

**Structure files (CONTCAR) involved in this work:**

|                    |                    |                    |
|--------------------|--------------------|--------------------|
| 0.3085662905404323 | 0.3539476484423160 | 0.5166061756470887 |
| 0.4091673560047069 | 0.3292197603315953 | 0.3934476600019302 |
| 0.3923856986286662 | 0.3437066318462367 | 0.1991121466036609 |
| 0.2682631589191216 | 0.3471570148908666 | 0.2654088036174925 |
| 0.1817034807754391 | 0.4477285313477062 | 0.2854671046968291 |
| 0.4118374072659333 | 0.4514592812872676 | 0.3140106225414229 |
| 0.0661623104763957 | 0.6247102455486249 | 0.0799398376285056 |
| 0.0832096571054757 | 0.4927579592610398 | 0.0675960201592623 |
| 0.1176589461408513 | 0.3630677577800481 | 0.0645144344657483 |
| 0.3050031918991213 | 0.6315147407889078 | 0.1133684309283162 |
| 0.3228736581721740 | 0.4995338650105804 | 0.0811000783108113 |
| 0.2944273217552559 | 0.3676372647561971 | 0.0709734805281062 |
| 0.5160625048053070 | 0.5330105401762811 | 0.2874263500920348 |
| 0.5106902559325539 | 0.3652562344304092 | 0.2782254673213698 |
| 0.4422386573357497 | 0.7506064769736993 | 0.6488182902701685 |
| 0.1948595497430037 | 0.7478467727595769 | 0.6519252530966003 |
| 0.2727100161956656 | 0.7492490424020474 | 0.0406423451292952 |
| 0.1081630169413811 | 0.7498678358924313 | 0.0568749947886449 |
| 0.0642352722176391 | 0.2502474105538802 | 0.1335433664886759 |
| 0.3065215999624920 | 0.2474463452690593 | 0.1464237862989184 |
| 0.2260082977078053 | 0.2504628521177190 | 0.5429505230817586 |
| 0.3908831388651119 | 0.2503210742903925 | 0.5491158981689026 |
| 0.5603558263359467 | 0.2509616054119991 | 0.3513375002572112 |
| 0.8004005097049356 | 0.2448095938121915 | 0.3462631837666905 |
| 0.7281092261829427 | 0.2494219889838991 | 0.9476329841394880 |
| 0.8930804579698615 | 0.2486859886663551 | 0.9427935453076728 |
| 0.9377861355281166 | 0.7482526837014267 | 0.8624113505049738 |
| 0.6861063495559124 | 0.7575359807889754 | 0.8563294030368896 |
| 0.7720636609980911 | 0.7465524824202595 | 0.4553207094633130 |
| 0.6066071459139211 | 0.7491325052600705 | 0.4518081606677285 |
| 0.8212243355155748 | 0.3259424571626085 | 0.3219099646234682 |
| 0.7989928011862110 | 0.4748840970783583 | 0.7190433353654062 |
| 0.9042572856502776 | 0.3932989213803266 | 0.6299120530420451 |
| 0.8844806364102679 | 0.3180989243015306 | 0.6448836891851669 |
| 0.9848930922260102 | 0.4892492367173037 | 0.5927874142047692 |
| 0.0165775301541207 | 0.4129692598456076 | 0.5411600856247591 |
| 0.8785699035056010 | 0.3858826329114027 | 0.4351031548510262 |
| 0.9527148383209202 | 0.4592912364162413 | 0.4779331753068565 |
| 0.9715109698715908 | 0.4435202324917953 | 0.5516655911126386 |

**Figure S3 Mn/ZSM-5**

1.0000000000000000

20.0219993591000005 0.0000000000000000 0.0000000000000000

0.0000000000000000 19.8990001678000006 0.0000000000000000

0.0000000000000000 0.0000000000000000 13.3830003737999998

Si O Al C Mo H

94 192 2 3 4 4

**Direct**

0.4235505408174077 0.0562340983452740 0.6543456082012001

0.3047451871618271 0.0294164526280216 0.7969487307125327

0.2810883582430784 0.0586481515442774 0.0219844976995976

0.1203416986461088 0.0656304000712736 0.0193855503425318

0.0662958723610195 0.0276429696585770 0.8071907986696747

0.1785498897163834 0.0621678836863286 0.6693621286894342

**Structure files (CONTCAR) involved in this work:**

0.4158391403503640 0.8261894376979655 0.6654011765494238  
0.3033731971840746 0.8702018914718374 0.8080697065014552  
0.2705410115199433 0.8302536553471429 0.0260216248890434  
0.1161592989594517 0.8251933241656183 0.0123790670041268  
0.0676013158961498 0.8701098453374034 0.7996769568336043  
0.1842228473618931 0.8274776584833907 0.6726707034444984  
0.0788709705408540 0.9386215799500863 0.1518693614595395  
0.1943977497511732 0.9676878941843887 0.2977746785039578  
0.2175728455399069 0.9428754929146063 0.5208947210949340  
0.3760744813908634 0.9352621743040763 0.5149726505806581  
0.4333356213764411 0.9701772627251929 0.3044393986626695  
0.3187566897779035 0.9375449241635180 0.1699803297501749  
0.0791884163127501 0.1724926653566416 0.1757499241546216  
0.1980724221260406 0.1264521483043195 0.3068626166122924  
0.2320249383430270 0.1675969436001933 0.5258459926576068  
0.3868752919492965 0.1713169384641407 0.5181459197483087  
0.4361865597768187 0.1286339609918793 0.3046293333217145  
0.3202757372184588 0.1712550149060743 0.1732682087593390  
0.5786201676706924 0.5591717071777799 0.3498871269533310  
0.6922697375846356 0.5281185888512339 0.2027254468571830  
0.7179669191366385 0.5565308323332346 0.9805900715308199  
0.8765581411860245 0.5669635538553488 0.9816631972075873  
0.9337929172499264 0.5377327710782797 0.1909376389914697  
0.8165388916703744 0.5641514782466797 0.3258367203585508  
0.5835090133620408 0.3265353930797488 0.3341213053298399  
0.6969224515354159 0.3711251345645049 0.1966690112858893  
0.7328984080764166 0.3292317819737880 0.9802271496799583  
0.8890465885597388 0.3262023865930881 0.9879178908491161  
0.9368947236937888 0.3791950776193123 0.1980110297655162  
0.8210040676033671 0.3340592499276669 0.3304531717713181  
0.9222079223317892 0.4415607790880224 0.8496189362521820  
0.8052173642384682 0.4715133484439819 0.7051261724033530  
0.7836035206470631 0.4470469245357780 0.4817377279383743  
0.6241508090991700 0.4377303776984973 0.4885887689746978  
0.5684951326784509 0.4676992792950848 0.7012095773897589  
0.6845795675355398 0.4332800420220628 0.8324020762446195  
0.9258612077824694 0.6720714716289523 0.8227582768444131  
0.7638116560665411 0.6697726391482807 0.4683844921129936  
0.6113215202195075 0.6724743097505326 0.4875821507050323  
0.5639625798815381 0.6267435518248934 0.7015254698861156  
0.6791930668600069 0.6769136033277768 0.8360662051477116  
0.5769293807266074 0.9424290994853836 0.3545552330104478  
0.6956473562567799 0.9747712686570639 0.2141261170567211  
0.7135080324464056 0.9414379608534162 0.9878387832640233  
0.8730164667868504 0.9295412857912783 0.9903710033591701  
0.9339186578052457 0.9646242783785937 0.2033764823680217  
0.8194329346757185 0.9391322671356238 0.3387537982007184  
0.5820614836979658 0.1736160002782063 0.3376970949261102  
0.6997549864031010 0.1318298315514520 0.2025820708955024  
0.7321931408378854 0.1679831261137574 0.9845037209434323  
0.8883562309796187 0.1701832438574278 0.9940719820534479  
0.9363537748987071 0.1241152936629277 0.2097359724318317  
0.8202337470993500 0.1764357803145203 0.3322004373108525

**Structure files (CONTCAR) involved in this work:**

|                    |                    |                    |
|--------------------|--------------------|--------------------|
| 0.9185761354786068 | 0.0564469723343300 | 0.8549637773267252 |
| 0.8066204576649908 | 0.0375199826232498 | 0.7049296867008342 |
| 0.7823016813867353 | 0.0617719359904701 | 0.4827819462662524 |
| 0.6233807408476792 | 0.0638219137887961 | 0.4925685785245859 |
| 0.5688468440064791 | 0.0297815008749274 | 0.7041953472118795 |
| 0.6852354871657711 | 0.0641669287221212 | 0.8355368361620094 |
| 0.9229996632320902 | 0.8255615485459895 | 0.8342993556690187 |
| 0.7627466069485606 | 0.8289068499292902 | 0.4821396607128532 |
| 0.6114388455231194 | 0.8278269214383134 | 0.4887260849222438 |
| 0.5606891805677049 | 0.8720801102053659 | 0.7015274400792829 |
| 0.6646410011125287 | 0.8296839592752351 | 0.8512861979012297 |
| 0.4247348732896427 | 0.4409474603039433 | 0.6511937135663688 |
| 0.3063495220154206 | 0.4694800521808980 | 0.7958837212236644 |
| 0.2826233411313414 | 0.4401541493337187 | 0.0184753566397549 |
| 0.1222364185252170 | 0.4312309182931033 | 0.0158875836134793 |
| 0.0689223116009154 | 0.4675257488064270 | 0.8033186036841804 |
| 0.1822834314297867 | 0.4354877286162945 | 0.6675470360412603 |
| 0.4197320907114156 | 0.6724316961909254 | 0.6687039817946729 |
| 0.3048970158743116 | 0.6291718007251078 | 0.8091767445204965 |
| 0.2736264555406785 | 0.6693661407680261 | 0.0276858358812211 |
| 0.1197787367892263 | 0.6712331362142302 | 0.0126849266161413 |
| 0.0730623912110251 | 0.6249950201748543 | 0.8008251613500764 |
| 0.1863873097792108 | 0.6702502296719078 | 0.6729689077463902 |
| 0.0800229449397153 | 0.5578823217525309 | 0.1505768281638646 |
| 0.1959157662890429 | 0.5310983525860634 | 0.2974279157644612 |
| 0.2225334547715598 | 0.5554152106147114 | 0.5209189836189435 |
| 0.3813253328736666 | 0.5628950358092647 | 0.5133736879555749 |
| 0.4353349059814178 | 0.5279126943373156 | 0.3030309549526103 |
| 0.3203942675562592 | 0.5608364276918195 | 0.1667806578388349 |
| 0.0794350645034328 | 0.3271879916951567 | 0.1730504420450197 |
| 0.1976653073721566 | 0.3719273080364680 | 0.3072100425818369 |
| 0.2334484910932269 | 0.3289313029882773 | 0.5238137279663028 |
| 0.3884504307811813 | 0.3247342429854579 | 0.5162129876016264 |
| 0.4380098863349475 | 0.3699501358884372 | 0.3047993292355192 |
| 0.3205223526210739 | 0.3285556854666232 | 0.1736891825891948 |
| 0.3594763694310124 | 0.0669444001621874 | 0.7272917206986497 |
| 0.3138488848920912 | 0.0539195483266658 | 0.9114774140438315 |
| 0.2003805423269381 | 0.0554924540097943 | 0.0162652529562901 |
| 0.0909318148436411 | 0.0663181701317502 | 0.9071586718926524 |
| 0.1022604469221810 | 0.0618034754732833 | 0.7108000148928547 |
| 0.2292183172417323 | 0.0479049276354935 | 0.7621490568430861 |
| 0.3587787067636337 | 0.8250470489385786 | 0.7516668031278202 |
| 0.3089244245691523 | 0.8566784701253053 | 0.9268199363269806 |
| 0.1924982863652304 | 0.8529317850100397 | 0.0187151933605086 |
| 0.0901625418167611 | 0.8281089216977140 | 0.8979026515283377 |
| 0.1055984278868679 | 0.8383127832334388 | 0.7020434495667540 |
| 0.2290080592796676 | 0.8488428612643516 | 0.7690485678443645 |
| 0.3166802062026541 | 0.9489662334074633 | 0.7845897159054206 |
| 0.0878918378205096 | 0.9486070015665392 | 0.8134129436137992 |
| 0.4335494994408169 | 0.1238542297719767 | 0.5876267371885620 |
| 0.4139705682384842 | 0.9924162847063169 | 0.5800989256635670 |
| 0.3855359954444305 | 0.8617246553193033 | 0.5656930449308967 |
| 0.1942299216106163 | 0.1355486666773704 | 0.6218647344197671 |

**Structure files (CONTCAR) involved in this work:**

|                    |                    |                    |
|--------------------|--------------------|--------------------|
| 0.1863540757259742 | 0.0038231816339687 | 0.5856608171346981 |
| 0.2030084851223319 | 0.8710360093623793 | 0.5744557595518611 |
| 0.9860115499878174 | 0.0344634155268421 | 0.7957096730250458 |
| 0.9875985655748013 | 0.8630290012183943 | 0.7843268736853394 |
| 0.1425684017350187 | 0.9283729161017873 | 0.2249808109477210 |
| 0.1821867478192395 | 0.9432161966415626 | 0.4117611694934098 |
| 0.2973338866707206 | 0.9542442843322840 | 0.5089292299431347 |
| 0.4082417549721886 | 0.9314846430978909 | 0.4042797854043402 |
| 0.3956216641395360 | 0.9402540226168322 | 0.2069824800653454 |
| 0.2706569507325850 | 0.9496820968562338 | 0.2664142984109841 |
| 0.1409682225639535 | 0.1717915998169036 | 0.2540975527725373 |
| 0.1958885705108793 | 0.1391015978567582 | 0.4260171886779782 |
| 0.3100448344554983 | 0.1445476320943372 | 0.5250006441485034 |
| 0.4121449058081728 | 0.1691049646837644 | 0.4033283384985789 |
| 0.3974278241805780 | 0.1591767869732134 | 0.2077015203493041 |
| 0.2713728255327844 | 0.1471635374384068 | 0.2642252232799244 |
| 0.1819267496865353 | 0.0479208911692983 | 0.2837064950136101 |
| 0.4174028748032408 | 0.0497830604447985 | 0.3173155210111078 |
| 0.0693523768713903 | 0.8718708851574771 | 0.0832762187561471 |
| 0.0862385167862492 | 0.0042532201727687 | 0.0810713761943118 |
| 0.1013323110231314 | 0.1367633699270595 | 0.0715422483361994 |
| 0.3046232323136864 | 0.8636955359915092 | 0.1235977149311709 |
| 0.3067210456544686 | 0.9949519981493992 | 0.0863607776554211 |
| 0.3045552841195766 | 0.1288635436420236 | 0.0724334664113639 |
| 0.5123276576526283 | 0.9576270191630019 | 0.2854311595576728 |
| 0.5162561755642389 | 0.1374966521780904 | 0.2901248099064936 |
| 0.6428337291374516 | 0.5691115730172969 | 0.2771487776913278 |
| 0.6797160365955469 | 0.5501302410670995 | 0.0878846563787428 |
| 0.7978882032649509 | 0.5556290612052945 | 1.0005284469672600 |
| 0.9134332710940836 | 0.5776351624741497 | 0.0890799586606614 |
| 0.8930837374804202 | 0.5681086430888195 | 0.2858740319588092 |
| 0.7696262323954108 | 0.5439177543881237 | 0.2314389451053170 |
| 0.6415745367905542 | 0.3234808620234616 | 0.2494592143977536 |
| 0.6953568492868865 | 0.3602795660311726 | 0.0771977462385538 |
| 0.8114504054586568 | 0.3502730607638325 | 0.9823980248770212 |
| 0.9159322056464357 | 0.3347906325896579 | 0.1014617739528601 |
| 0.8968601514225583 | 0.3521459194648039 | 0.2958426275304096 |
| 0.7711284791705538 | 0.3524361350218551 | 0.2380336829251869 |
| 0.6777407435327972 | 0.4486064317904972 | 0.2216323116336563 |
| 0.9188534163801824 | 0.4577140918628026 | 0.1778148972583871 |
| 0.5660717363654171 | 0.6289915671474403 | 0.4103244157651476 |
| 0.5876138133549486 | 0.4990902173092482 | 0.4306876506813810 |
| 0.6099024509664371 | 0.3673436110307747 | 0.4311917937945740 |
| 0.7951947554251596 | 0.6379661035037330 | 0.3668308961164754 |
| 0.8112690087240167 | 0.5088069458212948 | 0.4140949375884744 |
| 0.8015229096299815 | 0.3756414746017003 | 0.4298911788231611 |
| 0.0123174582746819 | 0.5498220719178187 | 0.2159468418039557 |
| 0.0165745063347949 | 0.3695524769858517 | 0.2180525483168310 |
| 0.8602739396356341 | 0.4324162888315337 | 0.7737411306806211 |
| 0.8196278371255572 | 0.4502506589760552 | 0.5894752606401006 |
| 0.7032934751763433 | 0.4537519509495128 | 0.4930496117438500 |
| 0.5932164396728370 | 0.4304017626979836 | 0.5997406284445027 |
| 0.6070324152242927 | 0.4373454928864478 | 0.7976263247256519 |

**Structure files (CONTCAR) involved in this work:**

|                    |                    |                     |
|--------------------|--------------------|---------------------|
| 0.7312641078344956 | 0.4426515464551440 | 0.7342604908423088  |
| 0.8813028537173004 | 0.6732691573862188 | 0.7200025939797869  |
| 0.8101645888718169 | 0.6508071958902143 | 0.5631218871482399  |
| 0.6876489908078284 | 0.6432522246285068 | 0.4856483923516018  |
| 0.5825412829101121 | 0.6671428191454855 | 0.5998384666229148  |
| 0.6042806305558653 | 0.6582648677942043 | 0.7948292462359194  |
| 0.7341899258784619 | 0.6730762929011693 | 0.7483918734565339  |
| 0.8088805824830335 | 0.5508374169640341 | 0.7229214708862395  |
| 0.5825784675956769 | 0.5477432009274370 | 0.6890560220495493  |
| 0.9330020207402590 | 0.3715457705703633 | 0.9112087995019343  |
| 0.9099497379438465 | 0.5017652352191204 | 0.9294372974167466  |
| 0.8868759478890630 | 0.6335662345940208 | 0.9124089078413780  |
| 0.6976016018036487 | 0.3594962393341586 | 0.8811913689028856  |
| 0.6990346382199493 | 0.4913049387334316 | 0.9143419688172957  |
| 0.6959362500423178 | 0.6258307501255497 | 0.9280260116032193  |
| 0.4897189727916875 | 0.4528193833215611 | 0.7209125762741283  |
| 0.4837310765743049 | 0.6351290359445363 | 0.7188494064018522  |
| 0.6414694414513264 | 0.9348786964196584 | 0.2815922970986043  |
| 0.6840251872238660 | 0.9619644944302804 | 0.0968704557369501  |
| 0.7925761701176230 | 0.9234184828609194 | -0.0023479997965541 |
| 0.9050455242393548 | 0.9318166826609672 | 0.1019287664208390  |
| 0.8965362966523370 | 0.9290192508843722 | 0.3001251263658423  |
| 0.7701093233217674 | 0.9471644490165174 | 0.2443472269265045  |
| 0.6400600595949107 | 0.1746332436810450 | 0.2529535431450028  |
| 0.6948777472596004 | 0.1371415913357635 | 0.0823883684607040  |
| 0.8106804851580653 | 0.1461554087199676 | 0.9866082241157262  |
| 0.9136226923750651 | 0.1624294304289428 | 0.1086632254424561  |
| 0.8969632222518678 | 0.1566113007037802 | 0.3042901882000927  |
| 0.7726953975842427 | 0.1601956170809082 | 0.2360760178179745  |
| 0.6915605044300508 | 0.0543563057774449 | 0.2401259883798907  |
| 0.9178084163300319 | 0.0443828309274772 | 0.2041783280119639  |
| 0.5644939197582743 | 0.8727237819391946 | 0.4155386136828687  |
| 0.5858721460330168 | 0.0029373466276200 | 0.4346914771033086  |
| 0.6080475261247061 | 0.1344820409040240 | 0.4367315119780648  |
| 0.8092661995488920 | 0.8650856227726822 | 0.3929726876550130  |
| 0.8139320921598532 | 0.9999137007585096 | 0.4171133914201970  |
| 0.7956280400870005 | 0.1330126577353695 | 0.4278504514649578  |
| 0.0121136099474601 | 0.9479254238673277 | 0.2196823328484198  |
| 0.0163422792310329 | 0.1325201642946855 | 0.2257589377873797  |
| 0.8612242138359034 | 0.0762851165369530 | 0.7749178937706536  |
| 0.8189837969071554 | 0.0623501962110748 | 0.5900532442135971  |
| 0.7029282028763223 | 0.0481623808831199 | 0.4935694169227413  |
| 0.5949546756840752 | 0.0694518483284411 | 0.6053716057697963  |
| 0.6074380809709923 | 0.0565179383912052 | 0.8031588483552266  |
| 0.7312068336923555 | 0.0611694395372648 | 0.7356687302306868  |
| 0.8635485319351367 | 0.8298094654847067 | 0.7517899931528855  |
| 0.7943351402234274 | 0.8489973732019033 | 0.5894513339194125  |
| 0.6872855718666337 | 0.8585976192369129 | 0.4775224946865914  |
| 0.5875352773921364 | 0.8310647105353632 | 0.6040664676678772  |
| 0.5896182855492812 | 0.8391886320203129 | 0.8035823646983508  |
| 0.7181437493081462 | 0.8536966093052951 | 0.7698329237140165  |
| 0.8152071833110386 | 0.9583342082195327 | 0.7180937420545876  |
| 0.5832797985861448 | 0.9500712256715258 | 0.6891005971687912  |

**Structure files (CONTCAR) involved in this work:**

|                    |                    |                    |
|--------------------|--------------------|--------------------|
| 0.9341682793968288 | 0.1224378548419650 | 0.9232034865126123 |
| 0.8948140714298998 | 0.9959097908393113 | 0.9286411795785154 |
| 0.9022991763731937 | 0.8620881802646171 | 0.9380864853483192 |
| 0.6951432327882426 | 0.1371983125752882 | 0.8874800771101742 |
| 0.7061637881412114 | 0.0050130857818561 | 0.9130484896579558 |
| 0.6710715027535998 | 0.8766764778673719 | 0.9514253793963009 |
| 0.4898100929355614 | 0.0443866505172635 | 0.7217119265968213 |
| 0.4796574551253742 | 0.8681738671179983 | 0.7061793801986914 |
| 0.3590933013742736 | 0.4334675043137822 | 0.7214931001334298 |
| 0.3174000924356381 | 0.4426680360895867 | 0.9089688763582449 |
| 0.2021218118006198 | 0.4417174262000526 | 0.0086445569760153 |
| 0.0906862643478774 | 0.4291324993223687 | 0.9049524129030279 |
| 0.1057280837943901 | 0.4342854764299403 | 0.7070866548926862 |
| 0.2305605802878305 | 0.4511131698967316 | 0.7625171068230631 |
| 0.3599116663901683 | 0.6732395503388942 | 0.7504079045472849 |
| 0.3114225031939835 | 0.6440762754831966 | 0.9273918869765758 |
| 0.1961495439420420 | 0.6446736726791964 | 0.0245722426808694 |
| 0.0988555497520916 | 0.6680945604677506 | 0.8959191309086738 |
| 0.1078150495608226 | 0.6560875061006478 | 0.6998825494442952 |
| 0.2304652182254221 | 0.6511983796043277 | 0.7712160347324216 |
| 0.3175268606153971 | 0.5501575547219220 | 0.7871977399755797 |
| 0.0918956114539561 | 0.5461205297164466 | 0.8126903950577493 |
| 0.4336847187034653 | 0.3717336808403369 | 0.5881987267466551 |
| 0.4193483553690310 | 0.5033490257652417 | 0.5732974202091626 |
| 0.3944210458920431 | 0.6343758394659571 | 0.5681363361763759 |
| 0.1992698580307564 | 0.3620099749801154 | 0.6218278097521631 |
| 0.1907074631519228 | 0.4935694481073675 | 0.5833939430888082 |
| 0.2088657285532367 | 0.6264609222427495 | 0.5769959564223907 |
| 0.9892881936371140 | 0.4592060601117180 | 0.7861415678560140 |
| 0.9931064230984630 | 0.6316900079197411 | 0.7921829556891680 |
| 0.1422998054725514 | 0.5692044876995366 | 0.2263866782535567 |
| 0.1872193030170337 | 0.5563785524815973 | 0.4118126699543933 |
| 0.3023323041422548 | 0.5448841428088476 | 0.5100283447312051 |
| 0.4103971366275171 | 0.5691541541781849 | 0.4009291806001126 |
| 0.3968743141574445 | 0.5538917165205897 | 0.2038361564238786 |
| 0.2714817610622048 | 0.5484331291372680 | 0.2620292963886838 |
| 0.1399939025310077 | 0.3279805783348024 | 0.2534667317697293 |
| 0.1948590651248246 | 0.3567402893432850 | 0.4257314240733397 |
| 0.3114835159770706 | 0.3512938925049434 | 0.5175469966536360 |
| 0.4166392312174364 | 0.3271208690668964 | 0.4028739086383525 |
| 0.3974213719770245 | 0.3408744583824641 | 0.2086421109542183 |
| 0.2710213320429338 | 0.3518233804097263 | 0.2641827704228635 |
| 0.1826766631069838 | 0.4508322490933272 | 0.2867766191977603 |
| 0.4198704091190255 | 0.4486224284308425 | 0.3219530675592335 |
| 0.0716864367940509 | 0.6237729781687668 | 0.0795955615249580 |
| 0.0897382643712238 | 0.4921512791408836 | 0.0802891501425481 |
| 0.1045831504030992 | 0.3598043937812540 | 0.0682427638821080 |
| 0.3100585515828391 | 0.6365030030957430 | 0.1239503190460324 |
| 0.3058633625922804 | 0.5061697411696242 | 0.0798850279702208 |
| 0.3059268373548825 | 0.3713825658367780 | 0.0730719466191654 |
| 0.5138358014862088 | 0.5418542542680872 | 0.2818755198133173 |
| 0.5176433476980772 | 0.3617803908839222 | 0.2853700687775937 |
| 0.4372096268918799 | 0.7496114702306761 | 0.6388410056300425 |



**Structure files (CONTCAR) involved in this work:**

|                     |                    |                    |
|---------------------|--------------------|--------------------|
| 0.1950198376383839  | 0.7490020736894669 | 0.6432658378202831 |
| 0.2771120974219672  | 0.7499795981230013 | 0.0365313220261469 |
| 0.1122003305140226  | 0.7481728422347581 | 0.0515490812382937 |
| 0.0582582576645998  | 0.2496292365581417 | 0.1523483906448463 |
| 0.3080431804364953  | 0.2499199014230396 | 0.1480132954076628 |
| 0.2261648408397932  | 0.2483345364196868 | 0.5313560933954372 |
| 0.3919681467495681  | 0.2481774152131155 | 0.5576342716740454 |
| 0.5653670897793783  | 0.2504918016558930 | 0.3690904389231383 |
| 0.8153501984282721  | 0.2552174456632907 | 0.3597269028645913 |
| 0.7251683636819377  | 0.2485478567792644 | 0.9813743192759918 |
| 0.8963704516854739  | 0.2474805631985985 | 0.9577132613958670 |
| 0.9418701234170013  | 0.7480018712731084 | 0.8604773231146499 |
| 0.6750135648569507  | 0.7519465887649249 | 0.8849569391476504 |
| 0.7612804535154158  | 0.7507833992883322 | 0.4510864052635743 |
| 0.6091481913403778  | 0.7504071498984289 | 0.4517686855056502 |
| 0.8016805024702676  | 0.6344076498914121 | 0.6925537345313405 |
| 0.7912917378106163  | 0.8757967795178982 | 0.7159596580558595 |
| -0.0075730848317282 | 0.8436440562860757 | 0.5063657399898827 |
| 0.9542557436406487  | 0.7216962167959566 | 0.4238020558881791 |
| 0.0939906439951475  | 0.6985507920860562 | 0.4299432111348023 |
| 0.9151196369881852  | 0.8137711858120340 | 0.4210398354149204 |
| 0.0264449428370573  | 0.7544579644151859 | 0.5241184558861472 |
| 0.9021588816166491  | 0.8187045930318383 | 0.5859362083444660 |
| 0.9201494508611966  | 0.7109194854385718 | 0.5752116119319176 |
| 0.1440097828736782  | 0.7102012139277439 | 0.4612240091771558 |
| 0.0870091657148279  | 0.6436931558737999 | 0.4325311718630473 |
| -0.0428337123037193 | 0.6874840363413216 | 0.3593333572168549 |
| 0.0938364821560916  | 0.7144515450411721 | 0.3512164018976059 |

**Figure S3 La/ZSM-5**

1.0000000000000000

20.0219993591000005 0.0000000000000000 0.0000000000000000

0.0000000000000000 19.8990001678000006 0.0000000000000000

0.0000000000000000 0.0000000000000000 13.3830003737999998

Si Al O La H C

95 1 194 1 6 1

**Direct**

|                    |                    |                    |
|--------------------|--------------------|--------------------|
| 0.4254819013154419 | 0.0578109484353502 | 0.6405689649341182 |
| 0.3053079510188978 | 0.0312208259849286 | 0.7857424660886881 |
| 0.2805738193872762 | 0.0685626986019391 | 0.0059519064459422 |
| 0.1200031073650549 | 0.0701137179168408 | 0.0054951895017976 |
| 0.0687750006913792 | 0.0325908539325692 | 0.7939000519857244 |
| 0.1802122815238869 | 0.0579160862552783 | 0.6474941554511798 |
| 0.4202876205275777 | 0.8282276653293192 | 0.6648199308977061 |
| 0.3039763778552791 | 0.8734221876775260 | 0.8065132401359486 |
| 0.2670107365109923 | 0.8336887958089779 | 0.0246429801484424 |
| 0.1128327153806066 | 0.8310894191929120 | 0.0105173079509493 |
| 0.0640561486544674 | 0.8750553727491873 | 0.7975298776998815 |
| 0.1822690686773498 | 0.8321504013164543 | 0.6719566773009988 |
| 0.0770919929125494 | 0.9480322450349935 | 0.1439979187097808 |
| 0.1968757418375643 | 0.9755715216436674 | 0.2917158338120218 |
| 0.2199187871730699 | 0.9377089447347419 | 0.5096386535434693 |
| 0.3796756941383934 | 0.9344316448572970 | 0.5080308972875083 |
| 0.4316003822038285 | 0.9732575862206658 | 0.2981405872682739 |

**Structure files (CONTCAR) involved in this work:**

0.3202151985757004 0.9513716290334379 0.1507922720492962  
0.0795977793063080 0.1745902947350687 0.1648157208265638  
0.1980784023739608 0.1319274800408317 0.3067346239474371  
0.2344103526459861 0.1763891409675523 0.5224047667303395  
0.3883720031538438 0.1756119099713560 0.5083629139525948  
0.4362078473949962 0.1308760561020129 0.2976520610423520  
0.3187274273585144 0.1715069724878436 0.1685486391081326  
0.5759053644373293 0.5570763901484088 0.3484829745323688  
0.6956951688030720 0.5270221018418471 0.2027923583327388  
0.7190953519232919 0.5650457041577934 0.9847099141013983  
0.8792903722389385 0.5684873203971375 0.9848980961130651  
0.9322704542309862 0.5328310655584845 0.1931932657046094  
0.8202235120287459 0.5548197876476888 0.3379461896543684  
0.5841853513632610 0.3293965915946921 0.3308612774124791  
0.6982684255506951 0.3700091609547720 0.1851148309677402  
0.7347091801701883 0.3278942025297655 0.9681473842597685  
0.8887920721925269 0.3247273917622956 0.9850023147095190  
0.8138575817343351 0.3323523218325506 0.3295886559601622  
0.9239831666116954 0.4434769363253395 0.8524313338635814  
0.8054305254245530 0.4735790307084084 0.7062662728862341  
0.7766704531413535 0.4411133792364225 0.4859813323451766  
0.6190164602474455 0.4381102076965873 0.4889813664266958  
0.5668757864586732 0.4720662424214400 0.7001324299617148  
0.6805528648931052 0.4456741256105918 0.8422877867002911  
0.9212067550140463 0.6744155640654799 0.8246149671989906  
0.8048848567672132 0.6314984131579872 0.6850238697078656  
0.7650505240874582 0.6708258064367040 0.4668489343478794  
0.6107154605772027 0.6742426588652506 0.4821938642610035  
0.5643994571128362 0.6295770451406331 0.6966951107374921  
0.6835071108399539 0.6725390117075459 0.8234658861904367  
0.5765537942946070 0.9453407906287367 0.3520308650269999  
0.6976209400510498 0.9732020934789803 0.2086936558798306  
0.7208114885359396 0.9360914976330218 0.9877169766369981  
0.8810369784761988 0.9342621062560966 0.9874993474464857  
0.9315867081961151 0.9732360703959237 0.2008569108731813  
0.8222298564045655 0.9462879527931839 0.3485850510208293  
0.5806103762787491 0.1751325467749327 0.3311789038025748  
0.6972155560067712 0.1311963464564528 0.1881632458690877  
0.7339209952125348 0.1712112805562866 0.9700296927292296  
0.8882621922946725 0.1731347701148089 0.9811030074036208  
0.8179664325496978 0.1742130630181292 0.3241893094173675  
0.9238831793503396 0.0553483348505079 0.8480189157431385  
0.8029421560208785 0.0271333446614408 0.7029491503550467  
0.7823210913475612 0.0662756918381143 0.4846264432272585  
0.6226379727705468 0.0678281542662877 0.4860736180821110  
0.5704056196341734 0.0305989895397767 0.6972081861532762  
0.6805415922114327 0.0531339686790212 0.8449611882123139  
0.9215218920216331 0.8291777420732009 0.8319270498358059  
0.8024946104660799 0.8705557528802365 0.6892821060870448  
0.7667273994474978 0.8272721637426664 0.4732468061294480  
0.6121250488000290 0.8276511335213317 0.4852893265710547  
0.5640941196079698 0.8725797656720320 0.6976306764501011  
0.6816816185184478 0.8312897315346246 0.8271159805753509

**Structure files (CONTCAR) involved in this work:**

|                    |                    |                    |
|--------------------|--------------------|--------------------|
| 0.4227923309097480 | 0.4461570531950217 | 0.6497068310820598 |
| 0.3045704510208098 | 0.4757465100861060 | 0.7983882569913333 |
| 0.2818088228945094 | 0.4358740463785410 | 0.0163064156830165 |
| 0.1201756643476463 | 0.4351187420570788 | 0.0144178953984984 |
| 0.0688646224128450 | 0.4699301881311473 | 0.8007374001215048 |
| 0.1825217603202935 | 0.4477658427926529 | 0.6607165126023493 |
| 0.4211960044835829 | 0.6734435330972219 | 0.6659089454217991 |
| 0.3042812641696105 | 0.6334760416106420 | 0.8110793816661679 |
| 0.2675321461581250 | 0.6768550211864007 | 0.0259443623776452 |
| 0.1133477516341800 | 0.6769119537001185 | 0.0100442325166857 |
| 0.0652546163884894 | 0.6285738952611460 | 0.7978934334822116 |
| 0.1838384445696764 | 0.6731062541124078 | 0.6735003608226048 |
| 0.0782870997951360 | 0.5619927468669520 | 0.1461966070463002 |
| 0.1952087139695687 | 0.5326093340835446 | 0.2938810712450629 |
| 0.2206282504199917 | 0.5662008936169188 | 0.5149800604324145 |
| 0.3810879010554777 | 0.5663123247628423 | 0.5078059436435484 |
| 0.4325356494175216 | 0.5313146084731787 | 0.2944835870181614 |
| 0.3181380722827837 | 0.5596758980050465 | 0.1558243190014278 |
| 0.0791870280185884 | 0.3293500164359446 | 0.1766512550197098 |
| 0.2001847439046044 | 0.3739541405326563 | 0.3082925097206804 |
| 0.2373562569326528 | 0.3336087153517277 | 0.5264721222661390 |
| 0.3917285638749972 | 0.3289758266064184 | 0.5162308228147332 |
| 0.4409398972231134 | 0.3735411206948591 | 0.3024993364027261 |
| 0.3225691606597996 | 0.3300366276194339 | 0.1767298953377212 |
| 0.9359974263780817 | 0.1314675996059555 | 0.1970450526908695 |
| 0.9331347525512496 | 0.3721111598124876 | 0.1984865535672603 |
| 0.3606144445973029 | 0.0644979844730227 | 0.7124532425817939 |
| 0.3049737188816541 | 0.0723084380275830 | 0.8905592661000411 |
| 0.2001209108659349 | 0.0595625388491262 | 0.0136061979949159 |
| 0.0969252522166448 | 0.0741084294352595 | 0.8897015689651471 |
| 0.1050921943186196 | 0.0584582042204259 | 0.6927582030743732 |
| 0.2316668486631988 | 0.0362629960310000 | 0.7358357942187449 |
| 0.3578547094552909 | 0.8313194008174576 | 0.7417065356145747 |
| 0.3064112061200543 | 0.8455718751362122 | 0.9201253142676912 |
| 0.1897581784286099 | 0.8581491612100665 | 0.0117562167300266 |
| 0.0840597728806954 | 0.8338270271545034 | 0.8976055617203950 |
| 0.1043962715985060 | 0.8441192227302559 | 0.7024607157421715 |
| 0.2293707053850220 | 0.8626668367153916 | 0.7605266456292524 |
| 0.3235571149138585 | 0.9526392472904753 | 0.8046044066489961 |
| 0.0839632099780936 | 0.9533638805033635 | 0.8125643691289068 |
| 0.4344647027947369 | 0.1264340077538272 | 0.5760073341547923 |
| 0.4192168367316217 | 0.9950892034520289 | 0.5634400623446439 |
| 0.4004802802924435 | 0.8636055869054508 | 0.5594109487538653 |
| 0.1965777223302588 | 0.1328695863878325 | 0.6072684619703157 |
| 0.1837999096630318 | 0.0036439425192491 | 0.5568218224225295 |
| 0.1976118416693524 | 0.8692530198785469 | 0.5664266643648918 |
| 0.9892818377386386 | 0.0447343076392847 | 0.7783708095236228 |
| 0.9841750818128634 | 0.8672229656527410 | 0.7782518973264599 |
| 0.1420477880853643 | 0.9442720750246124 | 0.2159453933998558 |
| 0.1978817894712463 | 0.9308718190507793 | 0.3932796611475977 |
| 0.3001646384066003 | 0.9477026764617901 | 0.5199769083817558 |
| 0.4005423537800654 | 0.9308404753999606 | 0.3911310673603033 |
| 0.3958195310574054 | 0.9512335586687094 | 0.1944550584858327 |

**Structure files (CONTCAR) involved in this work:**

0.2701611992738877 0.9740322025365457 0.2401781398765161  
0.1429996393065187 0.1696114702867077 0.2390241013254864  
0.1977160691449781 0.1678944587497787 0.4150974629784255  
0.3112394897911271 0.1496630331378504 0.5130460372568042  
0.4134768929113172 0.1759495500989281 0.3930627579680880  
0.3962100618814658 0.1564904873877453 0.1987262247965770  
0.2714150802498569 0.1389291266775823 0.2551662707532972  
0.1785078510827213 0.0531096849705831 0.3183694807477727  
0.4191479983157612 0.0526503459312611 0.3205943146170934  
0.0683069751596650 0.8770769361683157 0.0852703083610749  
0.0836505849607207 0.0075349067447222 0.0612999566058046  
0.0974414880432511 0.1398842467984847 0.0582371617848175  
0.3023201309745211 0.8761791454189817 0.1131310905545775  
0.3157492837788267 0.0038981526919426 0.0581471896045802  
0.3025710774676614 0.1380282087434700 0.0605655400275556  
0.5106426745987550 0.9575787606387077 0.2840970354114527  
0.5159432341325801 0.1399183787975093 0.2790362850104850  
0.6430875832015299 0.5593735403484835 0.2811597303340582  
0.6929009374436950 0.5696454149433235 0.0993963792002166  
0.7993602828830695 0.5552336503883560 0.9806930114665937  
0.9052135599578867 0.5773448182291808 0.0985617718998914  
0.8957053152155521 0.5589141960422072 0.2956042234222556  
0.7704816577635518 0.5302198550693596 0.2491774864527281  
0.6450059858065852 0.3283615604056941 0.2514442659384786  
0.6962778894253252 0.3395549158101052 0.0734325902126692  
0.8116743792648707 0.3522928283215621 0.9782198527263020  
0.9147166970093341 0.3224856534549110 0.0976708685591514  
0.8927473822137997 0.3482765715524706 0.3125634222354007  
0.7725598222434685 0.3612886818954362 0.2335000431947799  
0.6769115998526822 0.4487582921047102 0.1826538179760466  
0.9178623146839768 0.4551538752852569 0.1731619626376834  
0.5668665105675789 0.6279584626238339 0.4071014575533721  
0.5783574667322157 0.4967391880828263 0.4307337240407443  
0.6083236003301441 0.3667335677142072 0.4329027017202792  
0.7985496140217611 0.6287508208071519 0.3765977960053856  
0.8172681196100100 0.5009790929471366 0.4303999246196278  
0.7883429461355228 0.3691812325703993 0.4318464723359206  
0.0117337636666133 0.5474091020425679 0.2109766168055820  
0.0170607308702599 0.3596649463799989 0.2417958695283656  
0.8598918936785348 0.4372514895037808 0.7774493036497053  
0.8078484674084297 0.4331712352070475 0.5990585223847725  
0.6978363363323458 0.4590120871923035 0.4906099026274156  
0.5914486787085773 0.4303593640831288 0.6021152231720450  
0.6050361075653019 0.4445208277979854 0.7986934425256189  
0.7308654012324103 0.4673117264766830 0.7519573912078156  
0.8613319773502940 0.6743614540129479 0.7430270259556887  
0.8049391709530008 0.6559069967644999 0.5699085034861691  
0.6876840954145900 0.6477536050731907 0.4811666554948845  
0.5821671428139418 0.6701991193412736 0.5951683144928975  
0.6062424546969247 0.6606440796752003 0.7900321404084978  
0.7317984433477290 0.6436167658556967 0.7350950765629046  
0.8240885767606861 0.5519819832697697 0.6901079956258888  
0.5838477176657653 0.5510133541054490 0.6818293531828502

**Structure files (CONTCAR) involved in this work:**

0.9331819576158940 0.3734082934326468 0.9124656729525287  
0.9159454702793938 0.5055483190058084 0.9300628927535766  
0.8969062236430217 0.6375602455896626 0.9262437301113019  
0.6983114937494629 0.3708139700996808 0.8808142971369698  
0.6847241859694067 0.4997885745188092 0.9327295344063807  
0.6980499778540141 0.6339607274630971 0.9280513416089126  
0.4875133876349019 0.4613899120417357 0.7191293754807571  
0.4850163133756304 0.6375299512129189 0.7196342608135002  
0.6414279872533242 0.9396684726985317 0.2801405333939345  
0.6997937610337065 0.9316602081932985 0.1044434966969015  
0.8010817339483157 0.9446159852563182 0.9749011986459259  
0.9018281538243059 0.9338534073854035 0.1042276280187451  
0.8968987287076416 0.9441490409061721 0.3015531879347900  
0.7703329839171089 0.9686480758075618 0.2613942417620169  
0.6422349970253093 0.1715549139423982 0.2531720283452062  
0.6947791900180051 0.1596111637168742 0.0749112407428362  
0.8110584519094827 0.1466841003629614 0.9829500206527215  
0.9180865926320705 0.1691758651987968 0.0933347934899328  
0.8956699621161203 0.1665660241093042 0.2893521370197654  
0.7711343446733860 0.1433630749141794 0.2357581455114605  
0.6794282345435769 0.0515792423754719 0.1884846815139121  
0.9151950312568178 0.0528569705433381 0.1889705511936735  
0.5673424537468934 0.8756473435657784 0.4138807188186125  
0.5833941042204868 0.0063993965677424 0.4321011355717577  
0.6002206505766301 0.1384060896901567 0.4355522245777395  
0.8049958665864382 0.8718933269261674 0.3900978166832672  
0.8201801543517264 0.0008911281934331 0.4389167496824213  
0.8059424323918107 0.1346703324313870 0.4288310692435477  
0.0113636435720055 0.9609274091470725 0.2120120107342933  
0.0157955566548708 0.1382592622578965 0.2180894077859782  
0.8581227667318466 0.0583373735638136 0.7778827885223427  
0.8017632670227515 0.0726045268858760 0.6020439780870753  
0.7022549567691274 0.0560850152737003 0.4708910755517716  
0.6032769783659682 0.0710415902292164 0.6035494631927668  
0.6050092669584906 0.0539077534048742 0.8011901454680709  
0.7300921479269187 0.0288278552099121 0.7557602919819707  
0.8573915697951338 0.8338791587385540 0.7587300695023235  
0.8032325733889538 0.8340102466965726 0.5811197822778044  
0.6896259736706679 0.8529132896965016 0.4824524663662494  
0.5852998289569280 0.8295413467340081 0.5995150889415924  
0.6041670342299451 0.8438273412376929 0.7946808822781983  
0.7289281618570790 0.8631087268242211 0.7398442601576117  
0.8209900746873279 0.9495772700034668 0.6757693063390868  
0.5825635620982819 0.9508331256431848 0.6784520916300657  
0.9319850266752189 0.1259079459550116 0.9071423903812071  
0.9191900337782584 0.9947956238555532 0.9293616148052085  
0.9039156784471218 0.8628858061295707 0.9395454395048493  
0.6989099254014686 0.1283725383697949 0.8815796684437287  
0.6846960369435908 0.0013821091291547 0.9386487915314587  
0.6964474825518768 0.8672557745372945 0.9337449774600397  
0.4914935940162337 0.0472611782480790 0.7087898419311525  
0.4842469761427070 0.8649011251022884 0.7169193638949638  
0.3566086661139232 0.4439528490007518 0.7189514375823191

**Structure files (CONTCAR) involved in this work:**

|                    |                    |                    |
|--------------------|--------------------|--------------------|
| 0.3087356149853547 | 0.4336835073362537 | 0.9019851522180307 |
| 0.2009717558212745 | 0.4341019569434921 | 0.0209874322925499 |
| 0.0960800588979042 | 0.4305317166960924 | 0.8991044851614596 |
| 0.1065369227218579 | 0.4417870523162213 | 0.7017795833613750 |
| 0.2293074362898552 | 0.4704118497877020 | 0.7542730221935052 |
| 0.3584855641598655 | 0.6714202447807831 | 0.7419053806494250 |
| 0.3074989756571179 | 0.6662232247908464 | 0.9216089606073152 |
| 0.1907272110347158 | 0.6512190485407647 | 0.0123529505651539 |
| 0.0851469809376773 | 0.6713811918218259 | 0.8968270139799031 |
| 0.1061558726436678 | 0.6581981804598203 | 0.7022480091073430 |
| 0.2299929802657172 | 0.6437145836564366 | 0.7639894773346143 |
| 0.3226478570046662 | 0.5541894642260666 | 0.8177772139955913 |
| 0.0831850911568825 | 0.5498773370706559 | 0.8150730670638446 |
| 0.4328996913521075 | 0.3733798813875195 | 0.5969868954518363 |
| 0.4172599852706186 | 0.5032870124089742 | 0.5630316857220317 |
| 0.4024248352263289 | 0.6360882833969339 | 0.5617464440076891 |
| 0.2055392601789830 | 0.3750668737830590 | 0.6187803796832745 |
| 0.1862972761429348 | 0.5036469596257868 | 0.5729257834743925 |
| 0.2024340548273829 | 0.6370074431501294 | 0.5684187217204307 |
| 0.9897589313985584 | 0.4556666557376333 | 0.7837761473957011 |
| 0.9857431927327351 | 0.6367466532271350 | 0.7761679995421018 |
| 0.1415217807332854 | 0.5687969352816014 | 0.2214517444261431 |
| 0.1909693361651201 | 0.5683121794726256 | 0.4023978256324598 |
| 0.3009713152476715 | 0.5553980625336919 | 0.5140447201248539 |
| 0.4054448118442111 | 0.5710045491598140 | 0.3926521977862508 |
| 0.3948271598190328 | 0.5577828348240647 | 0.1947997768486693 |
| 0.2702631227248156 | 0.5419998104638533 | 0.2502965313644346 |
| 0.1460733383902252 | 0.3301100295676128 | 0.2460806770922926 |
| 0.1968206765347215 | 0.3503933198360210 | 0.4241531479417999 |
| 0.3149474238867914 | 0.3558877042233430 | 0.5103538785899459 |
| 0.4254774607956027 | 0.3355100017623254 | 0.4069486772641102 |
| 0.3999888706714500 | 0.3374054274819477 | 0.2122130719668738 |
| 0.2747253328612660 | 0.3615577585995597 | 0.2638262586701416 |
| 0.1788649535856011 | 0.4525872793079191 | 0.3007563940440733 |
| 0.4185017487222711 | 0.4515919549730322 | 0.3104751241413207 |
| 0.0685862033829126 | 0.6320412174046169 | 0.0856142061928210 |
| 0.0915153355472655 | 0.5034820328440114 | 0.0640164702964234 |
| 0.0903183511266100 | 0.3709447741939425 | 0.0739023971102657 |
| 0.3028715343347757 | 0.6345697440957619 | 0.1146084009315240 |
| 0.3079395319171764 | 0.5051481376402679 | 0.0670463030951363 |
| 0.3115644993235159 | 0.3702063648177112 | 0.0726648541340801 |
| 0.5115857219037195 | 0.5456311888212659 | 0.2769478209217753 |
| 0.5206915144706729 | 0.3679662094786737 | 0.2804488772205881 |
| 0.4387341441101902 | 0.7508283172938692 | 0.6400522895756287 |
| 0.1967468590815851 | 0.7526991123740632 | 0.6585598894659941 |
| 0.2701898637206895 | 0.7553864461568019 | 0.0570025081103965 |
| 0.1089971330748743 | 0.7539907457858698 | 0.0484767768508478 |
| 0.0630236690294390 | 0.2527163356560146 | 0.1440213527184991 |
| 0.3049010303728524 | 0.2515159682926917 | 0.1592109668504902 |
| 0.2332253172577767 | 0.2546907829577031 | 0.5546681526795334 |
| 0.3946507408810653 | 0.2512831506450248 | 0.5523196734280685 |
| 0.5640525332682924 | 0.2527726989394567 | 0.3582213191277472 |
| 0.8002143578199625 | 0.2525909690337845 | 0.3437469567381458 |

**Structure files (CONTCAR) involved in this work:**

0.7298961053459821 0.2493863979081343 0.9371975731736963  
0.8920442822762671 0.2490520747898179 0.9376949872807808  
0.9401804198423391 0.7512766511208203 0.8521047966099319  
0.6970635157334247 0.7518717504445039 0.8404119566247021  
0.7695807659850639 0.7496050080788359 0.4374277094048971  
0.6061751038456240 0.7513257540055442 0.4437342187903573  
0.0231326733818003 0.4703854130906223 0.4661096513380517  
0.9118742182858344 0.3371511380497211 0.5703547430637282  
0.9947228061382849 0.3707239592549290 0.4327305326673983  
0.0244377450271377 0.5188018305647784 0.4574596363719924  
0.8739493152583920 0.3627521576467188 0.5974076249422543  
0.0902092898395111 0.3030798973649599 0.5855055770892545  
0.9305009922887597 0.3098248016480784 0.6239109049629351  
0.0892583106977149 0.2553440380383848 0.4731587049039723  
0.0257796371082866 0.2437070389200379 0.5630447605412990  
0.0570171878703502 0.2826606921696393 0.5268897987770742

**Figure S3 Cu/ZSM-5**

1.0000000000000000

20.0219993591000005 0.0000000000000000 0.0000000000000000  
0.0000000000000000 19.8990001678000006 0.0000000000000000  
0.0000000000000000 0.0000000000000000 13.3830003737999998

Si O Al Cu C H  
94 195 2 3 1 4

**Direct**

0.4227694072502425 0.0550218810075512 0.6403500735474557  
0.3028122997893631 0.0269104231506635 0.7846884412212297  
0.2798109521282683 0.0649220015169598 0.0048199231254185  
0.1199879057015123 0.0667692386707382 0.0046960089554461  
0.0694617700935074 0.0296569702011831 0.7933902236534824  
0.1789590440033714 0.0528510806624009 0.6451418134325757  
0.4210725021001617 0.8270730703550716 0.6630423760127705  
0.3039288126545516 0.8696162625758087 0.8046333359467942  
0.2673364130376318 0.8294160329364912 0.0238823487784492  
0.1128638347572027 0.8271079814139711 0.0104728469486719  
0.0655452418974057 0.8725181152720765 0.7974366921436451  
0.1820620566893099 0.8285337691305792 0.6678707167206722  
0.0767968290950029 0.9450007391710510 0.1421045607801903  
0.1970574594260274 0.9732719955792748 0.2874418734957205  
0.2186343495549480 0.9344036238495792 0.5063371904403268  
0.3779718471507066 0.9317017352862665 0.5073033131915280  
0.4298127504780542 0.9703031584348784 0.2973094208333437  
0.3206518839660127 0.9483195281307077 0.1473801332638487  
0.0793150624548741 0.1714004016586732 0.1622310818266478  
0.1969773702180828 0.1299318255330213 0.3045100200201815  
0.2325584017873888 0.1725512880308786 0.5208725629004465  
0.3871383794541460 0.1733056219533203 0.5067731851636541  
0.4350301417107777 0.1275565205222390 0.2964040906474270  
0.3180212912946054 0.1694157679665134 0.1668619539086870  
0.5753516132453400 0.5562406722650935 0.3540737094170446  
0.6972872433545071 0.5269736341886025 0.2189472421356655  
0.7141967444772203 0.5507577675143317 0.9872050454438959  
0.8722967542727800 0.5683726952490359 0.9930006329061650  
0.9286282510362484 0.5279088299134495 0.2045734326090825

**Structure files (CONTCAR) involved in this work:**

|                    |                    |                    |
|--------------------|--------------------|--------------------|
| 0.8203971024675761 | 0.5629221430412896 | 0.3498037713760220 |
| 0.5810907100668445 | 0.3251145597573584 | 0.3287179945491635 |
| 0.7025669049196207 | 0.3689663145701917 | 0.2039013413343455 |
| 0.7321411244834375 | 0.3292331102489510 | 0.9849153224312273 |
| 0.8886595527228237 | 0.3305250780613271 | 0.9966440623845326 |
| 0.9360440035666693 | 0.3696315037532666 | 0.2097832355859458 |
| 0.8220033714254446 | 0.3258777041997743 | 0.3401957684587752 |
| 0.9243166893175344 | 0.4480660708683495 | 0.8605325813376092 |
| 0.8066387346159045 | 0.4665210890687404 | 0.7148993189627667 |
| 0.7804334101316577 | 0.4397114010247773 | 0.4926148268771701 |
| 0.6203817155487535 | 0.4311938465359464 | 0.4892053666777938 |
| 0.5642342971777317 | 0.4642555171858662 | 0.6990611935773173 |
| 0.6781170180924695 | 0.4327750680143972 | 0.8380197113797154 |
| 0.7967778130832411 | 0.6246817128908470 | 0.7091205409062256 |
| 0.7670787801205331 | 0.6705348323363702 | 0.4863255451067991 |
| 0.6120591388882256 | 0.6723411816563559 | 0.4878117529715498 |
| 0.5630930596863168 | 0.6221233438996858 | 0.6988007471491353 |
| 0.6718236626810644 | 0.6649618866900279 | 0.8375460832134275 |
| 0.5758753342713406 | 0.9410940461223704 | 0.3482550353710090 |
| 0.6935728534977158 | 0.9712231042433014 | 0.2042818809033287 |
| 0.7189420877302936 | 0.9502250031999044 | 0.9809412322027086 |
| 0.8769583803570421 | 0.9471209315108222 | 0.9812300817068137 |
| 0.9329986171650034 | 0.9684948951142078 | 0.1937074124330500 |
| 0.8164640652998294 | 0.9296007891577649 | 0.3239911325691813 |
| 0.5804630646153223 | 0.1714742440517465 | 0.3214955853726983 |
| 0.7011146048757276 | 0.1282759840978566 | 0.1955583471176069 |
| 0.7357819961088484 | 0.1682723559065499 | 0.9776387472972609 |
| 0.8933175400769768 | 0.1776729270174450 | 0.9767644255156220 |
| 0.9370933167372471 | 0.1264362489887584 | 0.1939190160596733 |
| 0.8226958831623626 | 0.1722674727994672 | 0.3296393186344951 |
| 0.9242293269267982 | 0.0652615070264672 | 0.8400605266896364 |
| 0.8067753888809782 | 0.0303450042563686 | 0.6982772995023366 |
| 0.7831832202668030 | 0.0525827664075436 | 0.4730684413468044 |
| 0.6232818831333444 | 0.0657896666705152 | 0.4809256185857564 |
| 0.5671767992266625 | 0.0341179259443614 | 0.6921887589187947 |
| 0.6830472033606841 | 0.0658264375735312 | 0.8240163068889367 |
| 0.9179803841662066 | 0.8338955145466721 | 0.8252051548302417 |
| 0.8018875788231774 | 0.8723693537054573 | 0.6927305883001525 |
| 0.7673738926161342 | 0.8312123262356823 | 0.4772614975915833 |
| 0.6112001957860775 | 0.8271114223330279 | 0.4881130759736833 |
| 0.5647814323357555 | 0.8757298062085690 | 0.7023080957280221 |
| 0.4200027953464973 | 0.4438913922492242 | 0.6470655288237831 |
| 0.3001183483155606 | 0.4733092315004358 | 0.7904148202281528 |
| 0.2796331382894829 | 0.4355075486281761 | 0.0115003975861396 |
| 0.1204359985820547 | 0.4327766916180856 | 0.0106796317107783 |
| 0.0700891986856511 | 0.4701436309170834 | 0.7998496014434778 |
| 0.1774082601227258 | 0.4467526224417958 | 0.6496405606327266 |
| 0.4192724938082418 | 0.6718990601408511 | 0.6623992396810681 |
| 0.3027241172728925 | 0.6300262825778786 | 0.8063048445824115 |
| 0.2677421770411831 | 0.6727936174865313 | 0.0258503944153444 |
| 0.1140794651307006 | 0.6734106957037733 | 0.0110183189565873 |
| 0.0639123680037442 | 0.6282172602459528 | 0.7994632573626831 |
| 0.1807910468674137 | 0.6695858635709444 | 0.6680042395651163 |



**Structure files (CONTCAR) involved in this work:**

|                    |                     |                    |
|--------------------|---------------------|--------------------|
| 0.0740767237230051 | 0.5561363945235825  | 0.1413587365508990 |
| 0.1947379838715817 | 0.5274947370430172  | 0.2860026690245894 |
| 0.2162850549414764 | 0.5633833583155270  | 0.5074255858208069 |
| 0.3757496318011010 | 0.5655930966067754  | 0.5094470387827292 |
| 0.4301199326533961 | 0.5282697727012364  | 0.2989134550067086 |
| 0.3210107938316379 | 0.5544604636014083  | 0.1488764842111003 |
| 0.0791280914706931 | 0.3259727759324715  | 0.1664102806518081 |
| 0.1970970212205716 | 0.3694557330257416  | 0.3054063066576022 |
| 0.2328086753072213 | 0.3288933689700942  | 0.5237310552446166 |
| 0.3876631144262638 | 0.3261185439827757  | 0.5115093925817306 |
| 0.4372968598620963 | 0.3704593721471340  | 0.2993378456638339 |
| 0.3193377241002032 | 0.3285433768190454  | 0.1706731120458056 |
| 0.3568948831672653 | 0.0608776737035764  | 0.7102317317863971 |
| 0.3010173102012120 | 0.0697592440978202  | 0.8880627963981723 |
| 0.1996677446915313 | 0.0545020139078425  | 0.0167654205893618 |
| 0.0987014599661352 | 0.0714192584166830  | 0.8883029217715014 |
| 0.1040692586773680 | 0.0553528400403190  | 0.6907970765145031 |
| 0.2294958258756042 | 0.0289593662172429  | 0.7332738551094905 |
| 0.3593647120534790 | 0.8286690244762396  | 0.7415577655710355 |
| 0.3044589563917443 | 0.8404803532244183  | 0.9176164388876814 |
| 0.1897634492787655 | 0.8533167357236650  | 0.0144565854609068 |
| 0.0862721408372560 | 0.8303677828821213  | 0.8966713241938835 |
| 0.1049376713133996 | 0.8416566244632708  | 0.7013598624834188 |
| 0.2304490289893243 | 0.8588726424208960  | 0.7549949805990132 |
| 0.3226797233727962 | 0.9491089226310864  | 0.8065475372222146 |
| 0.0859766323567288 | 0.9508478864518701  | 0.8131828821708027 |
| 0.4314475280701171 | 0.1238292621352388  | 0.5761467658445256 |
| 0.4181234967607834 | 0.9920246587195881  | 0.5630391242457520 |
| 0.3975963150912512 | 0.8600810360985509  | 0.5572650256222599 |
| 0.1972337255102838 | 0.1276871389678806  | 0.6064453176019532 |
| 0.1806261765692292 | -0.0006428125727354 | 0.5533722306182797 |
| 0.1963483348720025 | 0.8653035668032316  | 0.5614899139764732 |
| 0.9901851814223026 | 0.0428473896141261  | 0.7788253874671133 |
| 0.9859559316044838 | 0.8674965119994832  | 0.7798435221799382 |
| 0.1428797142810135 | 0.9410821788866125  | 0.2114377779844825 |
| 0.1983215464317476 | 0.9286910414341633  | 0.3890763386717862 |
| 0.2985169599476325 | 0.9458910607845027  | 0.5195861467545981 |
| 0.3981173713697470 | 0.9282546161615504  | 0.3900687880268147 |
| 0.3957028325175020 | 0.9481345445969405  | 0.1925011739662864 |
| 0.2702238491590863 | 0.9722340173169670  | 0.2356343489033759 |
| 0.1427817305412232 | 0.1688770173427200  | 0.2365504204809841 |
| 0.1947068023259839 | 0.1635230673759530  | 0.4145320294636288 |
| 0.3097394491966882 | 0.1482538424445011  | 0.5083583882649431 |
| 0.4142467342667959 | 0.1727966577000641  | 0.3925337536105806 |
| 0.3953736107010464 | 0.1547739473406561  | 0.1980581287806182 |
| 0.2707736834405682 | 0.1386695089607872  | 0.2550701722769920 |
| 0.1777158284547279 | 0.0507992139225736  | 0.3125159219348042 |
| 0.4164687253978890 | 0.0496837017281007  | 0.3189673926742747 |
| 0.0673877788798354 | 0.8738193484126899  | 0.0834552968961824 |
| 0.0812940355681336 | 0.0050658239233910  | 0.0597624091171096 |
| 0.0984247413532322 | 0.1375152746288686  | 0.0556540507793515 |
| 0.3033532350997872 | 0.8727672112118660  | 0.1107035223241225 |
| 0.3170112448599747 | 1.0001920493213035  | 0.0537574126259671 |

**Structure files (CONTCAR) involved in this work:**

|                    |                    |                    |
|--------------------|--------------------|--------------------|
| 0.3018973425675336 | 0.1341344134150559 | 0.0600875565061074 |
| 0.5086707934365969 | 0.9546739212321191 | 0.2842596930188530 |
| 0.5148391583909804 | 0.1340727419893243 | 0.2763910793792801 |
| 0.6384526138619260 | 0.5655090918594052 | 0.2786776999918920 |
| 0.6893233076911629 | 0.5442842752199926 | 0.1012401395693744 |
| 0.7942673103115495 | 0.5486721842777319 | 0.9732056678717521 |
| 0.8916982269220569 | 0.5633395036961035 | 0.1100691191911111 |
| 0.8960103924984752 | 0.5569829538717985 | 0.3069417600852877 |
| 0.7694691560388478 | 0.5550690339315696 | 0.2549532993024653 |
| 0.6423686177539419 | 0.3247790287656400 | 0.2495994060741046 |
| 0.6988592690774660 | 0.3630209382609953 | 0.0836131754398919 |
| 0.8104087766820645 | 0.3509077372289633 | 0.9843036416553476 |
| 0.9098304608053548 | 0.3275432549943713 | 0.1135818041571901 |
| 0.8993549586309734 | 0.3409206180513402 | 0.3094144635660908 |
| 0.7746414017312112 | 0.3424261106172390 | 0.2435637772152260 |
| 0.6922529956421115 | 0.4467913996797374 | 0.2386732813860118 |
| 0.9158925055018965 | 0.4479496750041945 | 0.1945937044377419 |
| 0.5649718807969253 | 0.6243314140210287 | 0.4192218174874742 |
| 0.5867696691027215 | 0.4933215065762274 | 0.4290036981469268 |
| 0.6055571901779111 | 0.3612302923163139 | 0.4312171068504087 |
| 0.8110342697041449 | 0.6376422483012096 | 0.3960834438112707 |
| 0.8067848871753950 | 0.5054652600606481 | 0.4325567962449209 |
| 0.8009582118002946 | 0.3714319217708377 | 0.4348943039019717 |
| 0.0073101874822340 | 0.5460497090271614 | 0.2084541299869682 |
| 0.0164315642642135 | 0.3628388697117872 | 0.2218522056115469 |
| 0.8606465688174498 | 0.4313958778589418 | 0.7891785127726656 |
| 0.8155358076089837 | 0.4381887294915855 | 0.6018311519957723 |
| 0.6998371406990676 | 0.4443386067034279 | 0.5014974986742069 |
| 0.5863873335793079 | 0.4248974884981075 | 0.5983163136752147 |
| 0.6029361045048823 | 0.4313014700994983 | 0.7937469976259913 |
| 0.7308671908674363 | 0.4483201629785317 | 0.7492611450206129 |
| 0.8469168329799509 | 0.6728470816008174 | 0.7659733773182692 |
| 0.7928268359247428 | 0.6404496763150062 | 0.5907839371653831 |
| 0.6892368088945796 | 0.6494482400761546 | 0.4698218710743093 |
| 0.5928630448533665 | 0.6642936610879570 | 0.6050904990187798 |
| 0.5954363031442337 | 0.6519929493579421 | 0.8018848954137500 |
| 0.7210884421627586 | 0.6314526956793223 | 0.7564375547714044 |
| 0.8192172512634132 | 0.5464530718657238 | 0.7205340607169973 |
| 0.5833466206847528 | 0.5434340544218451 | 0.6874765002968286 |
| 0.9336155320840991 | 0.3863479733760771 | 0.9393514151509295 |
| 0.9157994706210411 | 0.5177681435473023 | 0.9240867417763282 |
| 0.8905749617463367 | 0.6464183552831493 | 0.9617184332657970 |
| 0.6945659759917933 | 0.3604687391348746 | 0.8881714901928305 |
| 0.6807723939118174 | 0.4923929523394089 | 0.9213811873884462 |
| 0.6819926383996343 | 0.6241761568609766 | 0.9485857215886923 |
| 0.4847423636275404 | 0.4551692383011324 | 0.7183489040002484 |
| 0.4827649641368266 | 0.6299319040877881 | 0.7059511522892241 |
| 0.6375145477306391 | 0.9328199606770511 | 0.2700721621321034 |
| 0.6789570386702872 | 0.9609817099336041 | 0.0857222004735814 |
| 0.7980813260794229 | 0.9625619860590531 | 1.0003385461869956 |
| 0.9132242364652948 | 0.9339720588865760 | 0.0878082223859160 |
| 0.8930345254060859 | 0.9323099801457434 | 0.2844482075651015 |
| 0.7666437013677685 | 0.9388614942702457 | 0.2280676006074482 |

**Structure files (CONTCAR) involved in this work:**

|                    |                    |                    |
|--------------------|--------------------|--------------------|
| 0.6375240689215214 | 0.1711649159800700 | 0.2349237005379394 |
| 0.7041081210481513 | 0.1309389842700773 | 0.0747379375673412 |
| 0.8154943109435219 | 0.1538899961729451 | 0.9716528623081645 |
| 0.9208367518396343 | 0.1628736666091611 | 0.0883669392860484 |
| 0.8977657282283165 | 0.1636463516629746 | 0.2847711407963612 |
| 0.7701366444473817 | 0.1597972459641064 | 0.2385735406890884 |
| 0.6931211001467938 | 0.0508130908672152 | 0.2330698997757902 |
| 0.9142351601842083 | 0.0480967075568728 | 0.1905763409887600 |
| 0.5659236477425492 | 0.8732011167397249 | 0.4139963489148227 |
| 0.5882958056013998 | 0.0035657210394999 | 0.4234526402382918 |
| 0.6083061841890969 | 0.1352168902363154 | 0.4215282145630058 |
| 0.8034902165012436 | 0.8568674304932480 | 0.3751161622917546 |
| 0.8032239265169085 | 0.9891352407976861 | 0.4038571883571376 |
| 0.8093404196695666 | 0.1214221509135488 | 0.4214393835932305 |
| 0.0123029043685530 | 0.9571607705700496 | 0.2135066600465539 |
| 0.0170084080971582 | 0.1320441607434975 | 0.2145108410740885 |
| 0.8617891852915972 | 0.0710725666688661 | 0.7636849623211956 |
| 0.8194244525421579 | 0.0457400839397345 | 0.5808533815809480 |
| 0.7030484207639093 | 0.0540146541659163 | 0.4880633297310000 |
| 0.5910807416186029 | 0.0725932269467513 | 0.5911572282820603 |
| 0.6062201368193902 | 0.0676214584863353 | 0.7864976520997248 |
| 0.7324582249597916 | 0.0570230265474511 | 0.7284776805443827 |
| 0.8657136248182381 | 0.8295993094801777 | 0.7327914411989001 |
| 0.8025125498578164 | 0.8681157087040916 | 0.5709960260840747 |
| 0.6885229014540843 | 0.8505724957321722 | 0.4740470688121038 |
| 0.5887041685049488 | 0.8335174850744488 | 0.6035126532972090 |
| 0.5994404813826654 | 0.8485273432518470 | 0.8023605996621780 |
| 0.7334444223456934 | 0.8444928412985344 | 0.7379587320848543 |
| 0.8139576845425208 | 0.9511697384149880 | 0.7239339868967077 |
| 0.5834419461371056 | 0.9546461907058854 | 0.6821809722681302 |
| 0.9364166365799752 | 0.1379510537537692 | 0.8927258513026968 |
| 0.9106368832354006 | 0.0124972041631188 | 0.9302877475033217 |
| 0.8860713843761198 | 0.8817089755178784 | 0.9122087770857679 |
| 0.6993495055236489 | 0.1362902166316987 | 0.8805322388807991 |
| 0.6910744129032913 | 0.0010671899532201 | 0.8976214850390734 |
| 0.7085480156573746 | 0.8709917446230275 | 0.9471243856651942 |
| 0.4878840261128226 | 0.0462438751291319 | 0.7110960454261511 |
| 0.4834906501620885 | 0.8680100201155072 | 0.7101994431722521 |
| 0.3540473637351619 | 0.4384177425290285 | 0.7165477424633095 |
| 0.2970365637971966 | 0.4301906960621537 | 0.8934081409786341 |
| 0.1997264375875677 | 0.4444118286386419 | 0.0296283654437095 |
| 0.1035646202380453 | 0.4290350797609194 | 0.8926864298398273 |
| 0.1025139295393041 | 0.4435032104284955 | 0.6957638821554548 |
| 0.2273924841106544 | 0.4728978067150685 | 0.7372679643956271 |
| 0.3597771125225536 | 0.6694370139088918 | 0.7440955934443543 |
| 0.3015868918459043 | 0.6622854108004221 | 0.9171501722857370 |
| 0.1905272115695546 | 0.6468705477840826 | 0.0235924260646237 |
| 0.0923704229904824 | 0.6704081141173608 | 0.8954218103901154 |
| 0.1038239609530777 | 0.6564765472076147 | 0.7011042997570021 |
| 0.2302089409596869 | 0.6389241952210720 | 0.7536016268916287 |
| 0.3215748665157225 | 0.5505935310272327 | 0.8132007014446830 |
| 0.0844195469236170 | 0.5494636906736015 | 0.8163649750853489 |
| 0.4301030897400417 | 0.3739972202384766 | 0.5861225661958483 |

**Structure files (CONTCAR) involved in this work:**

|                    |                    |                    |
|--------------------|--------------------|--------------------|
| 0.4152303172050765 | 0.5057646305979856 | 0.5676297381919063 |
| 0.3942653453457455 | 0.6379789971040386 | 0.5582395522268710 |
| 0.1984799908815531 | 0.3722597485762635 | 0.6121762979389354 |
| 0.1781785021692030 | 0.4991275266108902 | 0.5563698529065372 |
| 0.1951930912620269 | 0.6331213271831262 | 0.5613494474191747 |
| 0.9906008389102176 | 0.4545781623348676 | 0.7925157301616489 |
| 0.9850286038405379 | 0.6373497486930129 | 0.7893364194606615 |
| 0.1384399276407016 | 0.5605420779253359 | 0.2141218847881789 |
| 0.1949308060660213 | 0.5684436644230166 | 0.3907272642073156 |
| 0.2962845955782813 | 0.5510604179113234 | 0.5188258709843678 |
| 0.3984141949543310 | 0.5682848352387551 | 0.3933684422462155 |
| 0.3955884534848181 | 0.5531007191193311 | 0.1959198666222019 |
| 0.2679562146141244 | 0.5334933188432869 | 0.2352051350627349 |
| 0.1431919973830166 | 0.3277386166565515 | 0.2400576361937835 |
| 0.1940312787611482 | 0.3416012189344952 | 0.4188921698826702 |
| 0.3104011560861763 | 0.3517466901582199 | 0.5101095620865431 |
| 0.4180164621568442 | 0.3290515992457456 | 0.3994543593877790 |
| 0.3968850937799531 | 0.3399688096017229 | 0.2039607156089183 |
| 0.2715304542176858 | 0.3583141637515181 | 0.2590733328491622 |
| 0.1775214689232344 | 0.4486597482907691 | 0.3040963590747394 |
| 0.4172657779353446 | 0.4485729846433504 | 0.3158790783852554 |
| 0.0657647558339756 | 0.6265900052928877 | 0.0803930095080919 |
| 0.0798137656099489 | 0.4947310203867520 | 0.0619169472369170 |
| 0.0967112802867281 | 0.3626265757074695 | 0.0612529501624401 |
| 0.3076578144726756 | 0.6302012742619549 | 0.1096657179306306 |
| 0.3171086580351858 | 0.5013493328234717 | 0.0567094166032858 |
| 0.3051350730659527 | 0.3671426770860068 | 0.0657646433205783 |
| 0.5092791486375817 | 0.5437352452044329 | 0.2870970833328406 |
| 0.5173033814351393 | 0.3638698028237217 | 0.2794917882665067 |
| 0.4406318896564165 | 0.7490819046421214 | 0.6412738865391747 |
| 0.1957093835090447 | 0.7490126359329846 | 0.6532774409123835 |
| 0.2713967348809324 | 0.7512470013474178 | 0.0569932686039592 |
| 0.1069298723955643 | 0.7502878941338244 | 0.0509127094923154 |
| 0.0592984461284264 | 0.2490023997090267 | 0.1413971978099290 |
| 0.3048042525199379 | 0.2493032101651523 | 0.1542068631735932 |
| 0.2281756495596057 | 0.2504644222518549 | 0.5554642298058821 |
| 0.3927134454158177 | 0.2491809879486478 | 0.5508858042207349 |
| 0.5613436501038411 | 0.2479430586104331 | 0.3523352119093467 |
| 0.8136021996162567 | 0.2479888307557180 | 0.3727267115321095 |
| 0.7222761028830751 | 0.2485762276075876 | 0.9840106323091491 |
| 0.9009565713405128 | 0.2567057365930764 | 0.9495358565470537 |
| 0.9318698793137211 | 0.7616739620525708 | 0.8744299864714246 |
| 0.6859472713270219 | 0.7411329348152277 | 0.8710886942251672 |
| 0.7768875185037140 | 0.7506829033299411 | 0.4831407145555855 |
| 0.6014337168194043 | 0.7494094795036736 | 0.4533770358931185 |
| 0.7759164314062410 | 0.6705749678661987 | 0.0852568015798898 |
| 0.6787388731556095 | 0.7741629091585867 | 0.1119341169784948 |
| 0.8328702476102405 | 0.7995477171617676 | 0.0928912195305877 |
| 0.9173673687236459 | 0.6791550324289298 | 0.8389856662307762 |
| 0.6800227884978431 | 0.8267494868258313 | 0.8354157435423444 |
| 0.6888827223830623 | 0.6988686799535758 | 0.0448782023036522 |
| 0.7492538013706180 | 0.8174476167321609 | 0.0580466595553251 |
| 0.8605505700619253 | 0.7211135421369727 | 1.0457389678951079 |

**Structure files (CONTCAR) involved in this work:**

0.9421091738681975 0.7448489318804086 0.1227664981997722  
0.7768361897911026 0.6675117452538954 0.1583702108573951  
0.9631243172856370 0.7897309986320207 0.0881470793093713  
0.9230959429452861 0.7525191731770735 0.1985082413518168  
0.9686929559947048 0.6975897773703637 0.1090611570210945

**Figure 1(b) Zn/ZSM-5**

1.0000000000000000

20.0219993591000005 0.0000000000000000 0.0000000000000000

0.0000000000000000 19.8990001678000006 0.0000000000000000

0.0000000000000000 0.0000000000000000 13.3830003737999998

Si O Al Zn C H

94 193 2 2 1 4

**Direct**

0.4222315956906888 0.0600205156779385 0.6487854637370913  
0.3045012476925999 0.0322728876529955 0.7920110987578940  
0.2818657752749729 0.0569911233374105 0.0173973885070961  
0.1220366809981945 0.0646375585515379 0.0127024921004119  
0.0675227261455376 0.0317126074237008 0.8009059730707019  
0.1799319270717094 0.0652367480117991 0.6643628476806259  
0.4185470336617413 0.8276324771860039 0.6690150291323881  
0.3005674918896972 0.8733884740772896 0.8006464007003021  
0.2670572896507950 0.8306460767130091 0.0197645765926929  
0.1111488062166020 0.8264922470011626 0.0122511798790656  
0.0657960190755553 0.8745829848196881 0.7984341708504152  
0.1788158747427852 0.8289575359443325 0.6643465807818393  
0.0758808265854396 0.9415247346645308 0.1483358592874305  
0.1945178006034802 0.9702573503470594 0.2901488647036715  
0.2162536364009456 0.9438179629746244 0.5158842037005352  
0.3765283622632671 0.9356409060964369 0.5137380583773019  
0.4331462081474707 0.9684316074021273 0.3016654043894743  
0.3197667874931087 0.9357082933593539 0.1643855778715639  
0.0813835300565583 0.1738802783358495 0.1671514063743340  
0.1982414818409581 0.1288746277472329 0.3005557469396014  
0.2313949460795215 0.1697710701341047 0.5181122059719335  
0.3870875865329422 0.1737303182847238 0.5092430094284298  
0.4354348396722320 0.1269186706316908 0.2959778521220139  
0.3194348723868560 0.1724839917400661 0.1664440985485536  
0.5775657651960358 0.5556291375728190 0.3562433140995118  
0.6911664267681564 0.5272240292931422 0.2018331748169959  
0.7149018885076122 0.5687466265068272 0.9869202444663995  
0.8746660661026374 0.5716225208334758 0.9876157290602383  
0.9260979495963239 0.5304817072750423 0.1943521716043006  
0.8123324354244109 0.5522662515616440 0.3416848915342858  
0.5735169538511834 0.3290087480807520 0.3326970397492731  
0.6947120263311936 0.3726039350798545 0.1937292376226636  
0.7304165988855472 0.3273558047000320 0.9795838798106099  
0.8849556184572327 0.3263097782193150 0.9928689801521209  
0.9405473387596138 0.3761665441566485 0.1916250414106703  
0.9202498587157568 0.4447731311709951 0.8602290136918966  
0.8010556064841640 0.4734520932184035 0.7195371546317918  
0.7773510899729130 0.4373875225389444 0.4942691282497138  
0.6195229526841475 0.4289410070526531 0.4903103121484984  
0.5697252864861174 0.4696337751174794 0.7020700685261435

**Structure files (CONTCAR) involved in this work:**

0.6764133516277968 0.4477438730034380 0.8566076602795012  
0.9214669997805226 0.6777647209649632 0.8343511058374536  
0.7709815808687911 0.6690080225214183 0.4669765620662024  
0.6157341753338719 0.6731970324963737 0.4882693268855781  
0.5611492054323972 0.6279263991548523 0.6978929749763659  
0.6733194123714217 0.6744063445162389 0.8258554458958441  
0.5777571908336669 0.9451275416304852 0.3586403039453238  
0.6983344431163763 0.9739883057462562 0.2153940557534988  
0.7191879195250289 0.9380997500026527 0.9935420117796910  
0.8789899937396792 0.9346240901775669 0.9951795297196204  
0.9312709894759058 0.9705212528316134 0.2048150446026911  
0.8223692928731829 0.9465585664451398 0.3552303047466858  
0.5782648871081011 0.1737933433582603 0.3298724062502489  
0.6980681020436651 0.1321315831276810 0.1939929607452378  
0.7325360200974381 0.1712790532729801 0.9728420857873586  
0.8872924436894705 0.1734922280885325 0.9857008005114680  
0.9362552082056899 0.1283030779676535 0.1987948867280135  
0.8205991310862721 0.1726659023863183 0.3318686542863619  
0.9230733049166269 0.0549406207224494 0.8571264073934006  
0.8022985938807640 0.0263524798759124 0.7115502993782129  
0.7807058194754772 0.0654282421397593 0.4930427937157971  
0.6205386738203155 0.0697215408780324 0.4903912479196337  
0.5677486792877054 0.0322706343191112 0.6991474816920152  
0.6782999630398039 0.0534983648656173 0.8498241909314678  
0.9232556154012808 0.8302079554486773 0.8383935143947663  
0.8036875550047045 0.8691853224296789 0.6967808285260174  
0.7706093449475496 0.8270704852665202 0.4789466854090999  
0.6157371629899228 0.8268491375358838 0.4905538744257796  
0.5639416821093322 0.8750842979576171 0.6979636621705632  
0.6788885371370207 0.8332667001956593 0.8329208894178796  
0.4234652054761412 0.4420111021516682 0.6455736933925373  
0.3055060462636973 0.4694686426822835 0.7891408450671514  
0.2810321597832238 0.4454465570042859 0.0144755492645434  
0.1231238978403628 0.4370074258667705 0.0135697377099462  
0.0645280945443856 0.4686704025337660 0.8022392663690922  
0.1783069114589197 0.4355665477073838 0.6647917674434514  
0.4154282229323188 0.6737329992368452 0.6674559110768287  
0.3002362316956070 0.6278885093265238 0.8004922719581689  
0.2670545181388161 0.6694130549711498 0.0195621097078843  
0.1114691977166761 0.6725498131392876 0.0100580794430295  
0.0639651950583390 0.6276676152699711 0.7958462783338168  
0.1790492403077475 0.6716485362035711 0.6639356336453339  
0.0724103620807574 0.5585036693395222 0.1487071009987147  
0.1916736213115570 0.5310096529388600 0.2898985405040328  
0.2148379708835843 0.5558542154887833 0.5164235562236970  
0.3736924408231050 0.5657196715652351 0.5149697218740601  
0.4300429532120291 0.5317971560847691 0.3051893086063832  
0.3189859494504368 0.5645530454816490 0.1638548127195897  
0.0852896405331839 0.3270328733602879 0.1624379592929331  
0.1974473789059755 0.3726241340314367 0.3007199567281833  
0.2306292763022742 0.3311991622399076 0.5188040934000143  
0.3856283271663632 0.3277286193349838 0.5070205376009413  
0.4312017504912988 0.3743163985736111 0.2944024371849986

**Structure files (CONTCAR) involved in this work:**

0.3169576304332402 0.3301209392345960 0.1630237535487157  
0.3587223656454850 0.0708019817664016 0.7225417309613033  
0.3156900957622607 0.0541181000854965 0.9073263126121001  
0.2014694580022333 0.0496410518277391 0.0090307507805459  
0.0922788615215330 0.0704922368026509 0.9007997727055749  
0.1032587155745487 0.0648003206176115 0.7036596478675229  
0.2291474352821725 0.0531605449446985 0.7595300734138597  
0.3600719251571762 0.8286895275674412 0.7529316903414988  
0.3004737337639526 0.8623528345471941 0.9201450794160656  
0.1884318844502374 0.8507861514668343 0.0232013947121354  
0.0885540179934292 0.8324259036250212 0.8965023360515790  
0.1022021044804586 0.8419745553429002 0.7008840857966960  
0.2286852041928969 0.8506518023776347 0.7551834000309082  
0.3147653360751561 0.9519197268266414 0.7754799055505985  
0.0881297034459647 0.9527335876210766 0.8102015081921634  
0.4326065859911166 0.1275548349030401 0.5821801810371060  
0.4116508639051411 0.9965851461718144 0.5743632821214293  
0.3926385566507050 0.8646450357017890 0.5681127624408192  
0.1954376058232014 0.1383944389262191 0.6159524024455030  
0.1894370672022659 0.0059833146323479 0.5826630962469151  
0.1943124748748417 0.8723736762686833 0.5644056871104496  
0.9874920273267214 0.0404833937223294 0.7866959331002470  
0.9851708131433190 0.8702011041306292 0.7856540247623970  
0.1402405985583643 0.9318461768280892 0.2207397710351577  
0.1828513811729400 0.9495469705943889 0.4058055944296852  
0.2968069848859707 0.9485107605107119 0.5084383986728466  
0.4070006952843161 0.9314184886093124 0.4021890139225116  
0.3961003407665309 0.9362092428980964 0.2049128268972668  
0.2697944826198376 0.9485099660564884 0.2585575068107487  
0.1404422413693772 0.1744774899081883 0.2501117663730343  
0.1948100693676932 0.1388311928206161 0.4202990189850294  
0.3097965283596899 0.1484590163450085 0.5158629256792612  
0.4132829893513745 0.1682802211058344 0.3951448218388698  
0.3964697100573019 0.1585307388306861 0.1998482780531862  
0.2713666078167078 0.1522735662563915 0.2603824351428251  
0.1847739541166309 0.0506483399918972 0.2724395884360487  
0.4158154922844701 0.0482302379552537 0.3091962595633008  
0.0649181240030691 0.8733735420284694 0.0832559402259112  
0.0850142106396892 0.0042180987168053 0.0720176133513232  
0.1070036022697562 0.1357531209601619 0.0672312736196569  
0.3048555913644419 0.8624080330962021 0.1158676923341287  
0.3107145419176899 0.9947755551483510 0.0821459281121412  
0.3010041653530507 0.1284423376725704 0.0683219407073512  
0.5126876188772537 0.9556957263504177 0.2880000615734754  
0.5155702201259444 0.1339343706190223 0.2792202812682633  
0.6386590132598495 0.5614166257833324 0.2779420969758885  
0.6971091164094629 0.5755245385964121 0.1048037957531898  
0.7951544586835529 0.5611254688682505 0.9694128408848198  
0.8906773482061220 0.5747511235228481 0.1073207956845904  
0.8884851293199330 0.5397953200416695 0.3024937125785803  
0.7639059838739380 0.5249673752585823 0.2557960421762397  
0.6394846249252858 0.3363920050133776 0.2646688345712629  
0.6924839208949362 0.3345185882002784 0.0858754840375916

**Structure files (CONTCAR) involved in this work:**

0.8079063705919342 0.3520017550135217 0.9902940388763549  
0.9106907063796019 0.3251113486786326 0.1086096212627749  
0.9073939712203527 0.3603215570492993 0.3009986217585421  
0.7675480605425844 0.3690974938506221 0.2434686409429070  
0.6709082432544325 0.4506098653406876 0.1748848754077875  
0.9216891337266477 0.4524860792498498 0.1593574919469989  
0.5707683029520310 0.6266966927603298 0.4147895786972767  
0.5907337291962007 0.4966125507184569 0.4380401562205084  
0.5846951937944592 0.3629851788306233 0.4424432677399063  
0.8012408901177149 0.6311172409417073 0.3684218601403327  
0.7983735792468115 0.5124771017208428 0.4487761536616065  
0.8260585463652147 0.3825151620402347 0.4419874976327511  
0.0036837158115028 0.5510840078089642 0.2129027900832914  
0.0207905685406650 0.3689914699494892 0.2017794707944781  
0.8551078629624997 0.4346530145184768 0.7888145177369164  
0.7928884081181152 0.4354639313164801 0.6125868129133044  
0.6997693228960616 0.4238372963606204 0.4695283550358950  
0.6050721631105732 0.4302397676100408 0.6091931297145007  
0.6028182398900656 0.4449887140409938 0.8064213815439789  
0.7288776133236812 0.4747485349962287 0.7727071808275185  
0.8599443447067168 0.6799906406682691 0.7588305176790908  
0.8164450917998599 0.6442584152622473 0.5633956446344370  
0.6935042130288354 0.6472840306745177 0.4861661187480175  
0.5865558342097501 0.6692333633243549 0.6005016048081002  
0.5948717762313592 0.6606629476322714 0.7970326144422794  
0.7196882663263811 0.6494246805468322 0.7345835347442190  
0.8265942219962670 0.5498375756829550 0.6959861958074886  
0.5818464963038498 0.5494705559295309 0.6854012848811611  
0.9306647628835962 0.3770701253502733 0.9266925735345733  
0.9130212388976404 0.5085987337958969 0.9353121870324804  
0.9016046864352836 0.6411593931369645 0.9398214835936168  
0.6948149043298066 0.3728486339598961 0.8943811454327057  
0.6774483173715082 0.5009010627107842 0.9483618904815497  
0.6888161485068142 0.6350789322963676 0.9300794459712814  
0.4909487719813600 0.4518026733636337 0.7104680208382886  
0.4804020480393461 0.6329939714721716 0.7074703844310430  
0.6434840386903038 0.9402410984809662 0.2886756001044574  
0.6986846894691171 0.9331324341728343 0.1104799622989280  
0.7994743298353564 0.9470352510715555 0.9804124961371704  
0.8979596344237919 0.9290111419561236 0.1126674416415457  
0.8975463586595543 0.9488303467766809 0.3101684349877789  
0.7715798602780165 0.9681993350409052 0.2662678508084296  
0.6408432628217565 0.1735082296470160 0.2534705538959203  
0.6964789164902270 0.1577752278598359 0.0792356892337898  
0.8102625399500956 0.1475062658848867 0.9806613413223219  
0.9139036122449814 0.1697233644614941 0.0997617024138263  
0.8972228448465285 0.1559349461004115 0.2965514541019669  
0.7709419957681319 0.1451972584140380 0.2432501105837006  
0.6800637239320614 0.0524837235607058 0.1975040903807217  
0.9192690352574912 0.0495838445238686 0.1815446244358590  
0.5702758922446216 0.8750677405167442 0.4203784325301584  
0.5819165759072276 0.0071036868165700 0.4377258776934955  
0.5995237211704861 0.1393310007094944 0.4354253427132667



**Structure files (CONTCAR) involved in this work:**

|                    |                    |                    |
|--------------------|--------------------|--------------------|
| 0.8082266627946429 | 0.8704934346332525 | 0.3936706418667235 |
| 0.8161259181517537 | 0.9981217639539232 | 0.4486677377289938 |
| 0.8056561376983331 | 0.1321978174122681 | 0.4355025916557771 |
| 0.0102677566043715 | 0.9541095842745673 | 0.2164010037507755 |
| 0.0162186741083722 | 0.1378930309835619 | 0.2157608872650771 |
| 0.8569844273148522 | 0.0574232944225426 | 0.7876271738729012 |
| 0.8012140628811142 | 0.0713696423106965 | 0.6102937407928358 |
| 0.7002660054454186 | 0.0570940815838562 | 0.4806658386885861 |
| 0.5984776720289414 | 0.0757679895419821 | 0.6068274870630225 |
| 0.6033849542813555 | 0.0526151412415472 | 0.8037246170233201 |
| 0.7289378847056724 | 0.0280685334479576 | 0.7628485652783599 |
| 0.8598658319475593 | 0.8325005932221931 | 0.7637156352032842 |
| 0.8062760027202351 | 0.8349472323506361 | 0.5869288671733329 |
| 0.6932545985984154 | 0.8518355888632748 | 0.4865792368709800 |
| 0.5890505082949089 | 0.8290424295048533 | 0.6049076870278027 |
| 0.6031279308793860 | 0.8528594733086650 | 0.7989998247743293 |
| 0.7301028669284819 | 0.8586908822920358 | 0.7458051070838162 |
| 0.8205913561229105 | 0.9486939225228181 | 0.6861820177416126 |
| 0.5794663486089955 | 0.9533316503785144 | 0.6727340341383186 |
| 0.9325993527126903 | 0.1272873076314925 | 0.9121733332561316 |
| 0.9182578913890594 | 0.9970063451453018 | 0.9428268877747478 |
| 0.9024019648872051 | 0.8646686538457734 | 0.9439455305229617 |
| 0.6957296337103257 | 0.1294723209689207 | 0.8847419805781431 |
| 0.6821784286703518 | 0.0033754777205409 | 0.9455871941582666 |
| 0.6956701724675354 | 0.8694896042053821 | 0.9386543411928143 |
| 0.4888291876713122 | 0.0477559812307062 | 0.7149522221099645 |
| 0.4842676839095913 | 0.8644428183946208 | 0.7148442668131464 |
| 0.3604169393341384 | 0.4311167827079251 | 0.7204711147723251 |
| 0.3156042757394789 | 0.4476899622315189 | 0.9048258558922712 |
| 0.2010957681279478 | 0.4584104290534740 | 0.0054011647575516 |
| 0.0901614552203566 | 0.4325070364911656 | 0.9037205268424124 |
| 0.1023158518484131 | 0.4349311289488834 | 0.7072016588292578 |
| 0.2301170479393559 | 0.4486817555061040 | 0.7562332673046038 |
| 0.3589663018542694 | 0.6744639600983119 | 0.7545606884781448 |
| 0.3002616096802685 | 0.6371094035891228 | 0.9202363523231012 |
| 0.1886016651494795 | 0.6483338852608419 | 0.0234949942833375 |
| 0.0901930746432329 | 0.6681612619160285 | 0.8935888449796976 |
| 0.1021251050387419 | 0.6575422131324582 | 0.6978238418568125 |
| 0.2278752060632101 | 0.6499843585216484 | 0.7560802595390043 |
| 0.3156461975552686 | 0.5498763370728441 | 0.7727107018601226 |
| 0.0817907064092664 | 0.5483622602089862 | 0.8079229088687351 |
| 0.4324906965142208 | 0.3760707411694955 | 0.5749834223260948 |
| 0.4137020139543242 | 0.5076011809934778 | 0.5750409417793924 |
| 0.3843682052204085 | 0.6381165219793808 | 0.5683373898653774 |
| 0.1930794180536455 | 0.3625348186070853 | 0.6154708924746155 |
| 0.1836960144439810 | 0.4950638307070180 | 0.5822280266966572 |
| 0.1964617466157275 | 0.6283622169023397 | 0.5644332350500211 |
| 0.9849051158698073 | 0.4559688149457901 | 0.7887874299901808 |
| 0.9840198359603255 | 0.6371904557488242 | 0.7824201762334085 |
| 0.1348113104769866 | 0.5691909723505203 | 0.2246197345811769 |
| 0.1820531259413970 | 0.5518536241938882 | 0.4058589812853279 |
| 0.2951215437883731 | 0.5461985021498369 | 0.5108148155434877 |
| 0.4035118543677815 | 0.5715506264090703 | 0.4031055474741675 |

**Structure files (CONTCAR) involved in this work:**

0.3946126386250672 0.5639073998166306 0.2072077045892172  
0.2662595403180718 0.5524370197948962 0.2548374291876291  
0.1400299759995964 0.3258446870494138 0.2516436542663501  
0.1952613559536682 0.3624727485292812 0.4202791465304450  
0.3087515961282249 0.3533185123066740 0.5188207108253194  
0.4078349484381025 0.3302043093491031 0.3905261104314700  
0.3937628039325921 0.3469476461445009 0.1943068966304640  
0.2702730603734247 0.3508453627187705 0.2582184906766551  
0.1818501923879189 0.4505699028166915 0.2730062902964272  
0.4114108054674217 0.4524093277864870 0.3149058009791721  
0.0643564575627626 0.6239873133457996 0.0773057576903496  
0.0828784238397897 0.4920229833164358 0.0800387237777304  
0.1166033723142696 0.3629470217898821 0.0639765868946156  
0.3053742862128180 0.6379582264868832 0.1153302418302728  
0.3126030540530677 0.5051204509726049 0.0816069912400729  
0.2956564774023182 0.3724062150335896 0.0642196164628948  
0.5100358068208083 0.5408959156547845 0.2936163421817095  
0.5110994758510585 0.3661992984219894 0.2771239150039856  
0.4358755966227194 0.7503560283961320 0.6402897737052544  
0.1893524422943793 0.7503003846669222 0.6366010642599970  
0.2760570643499688 0.7499779024025252 0.0204944620995534  
0.1026838307727773 0.7492199061545166 0.0486675229358994  
0.0637939328353231 0.2507624765394045 0.1356077535020178  
0.3087110608285292 0.2509512743042997 0.1374589573330978  
0.2230935754765913 0.2505144000989211 0.5207611977746226  
0.3927882111928688 0.2510806136547014 0.5464893269166907  
0.5560413448172967 0.2506393667993306 0.3518825809168249  
0.8120446496648209 0.2512743224127766 0.3507687158188352  
0.7275054084075252 0.2499502795431543 0.9425131699982220  
0.8921090976668662 0.2510159876648129 0.9478567456160170  
0.9460099876452364 0.7536546577640559 0.8616944239831241  
0.6848556358855677 0.7534186761669736 0.8498779357498694  
0.7759873995867964 0.7486285336733370 0.4467111728951567  
0.6110298765359677 0.7502411118147339 0.4493102058457430  
0.9360285405464893 0.4975130542617143 0.5153702015760789  
0.8224576200824829 0.3348931679795021 0.3283149264224365  
0.8000090870480385 0.6358886402201445 0.6963214477525461  
0.9257223077509795 0.4184275279130043 0.4283374774303687  
0.8782922131611326 0.5611525886095515 0.5614789117031607  
0.0345494630853952 0.4246758578370449 0.4469638086174773  
0.0719820983274333 0.4452921595330606 0.4989136687178296  
0.0502067024040226 0.4382353005199771 0.3710143376400958  
0.0381147823186014 0.3697912720205833 0.4568296332109122  
0.9914107604529701 0.4698654186585214 0.4921681110281060

**Figure 1(b) Fe/ZSM-5**

1.0000000000000000

20.0219993591000005 0.0000000000000000 0.0000000000000000

0.0000000000000000 19.8990001678000006 0.0000000000000000

0.0000000000000000 0.0000000000000000 13.3830003737999998

Si O Al Fe C H

94 193 2 2 1 4

Direct

0.4240509578453535 0.0559207755249671 0.6444932144151279

**Structure files (CONTCAR) involved in this work:**

|                    |                    |                    |
|--------------------|--------------------|--------------------|
| 0.3060830112265017 | 0.0279877266182693 | 0.7912800510676774 |
| 0.2810634372913808 | 0.0634771710321883 | 0.0112490700472714 |
| 0.1203722503776186 | 0.0665777538862354 | 0.0079950024320218 |
| 0.0678951362047197 | 0.0305958303722109 | 0.7957650711128798 |
| 0.1821784621723393 | 0.0561326114204041 | 0.6553986294031272 |
| 0.4204499163476471 | 0.8271722399523213 | 0.6651560666966095 |
| 0.3053174470983875 | 0.8695921031570149 | 0.8086547895008827 |
| 0.2688412269469111 | 0.8292693264294727 | 0.0269901183000025 |
| 0.1145609015564627 | 0.8266603229817331 | 0.0126480396333224 |
| 0.0663623234852506 | 0.8717654399174359 | 0.7995123173850265 |
| 0.1840580848029733 | 0.8286600491736247 | 0.6728358793674271 |
| 0.0793290880787312 | 0.9431254695028931 | 0.1459241913938104 |
| 0.1970544600916301 | 0.9708155661100928 | 0.2928865339863242 |
| 0.2200696950161380 | 0.9368264813425401 | 0.5119458646419518 |
| 0.3799267362928466 | 0.9330424319346345 | 0.5081787634763955 |
| 0.4347096605652798 | 0.9696132240277837 | 0.2980892667582966 |
| 0.3208599566805538 | 0.9447308235341098 | 0.1572479904371988 |
| 0.0817253681583180 | 0.1720330327223909 | 0.1677002764618798 |
| 0.1986408950419688 | 0.1288075181468127 | 0.3081034797482373 |
| 0.2350286529080525 | 0.1716828531252809 | 0.5244019517036477 |
| 0.3896698888494333 | 0.1731923391807326 | 0.5093753426962585 |
| 0.4383488686688359 | 0.1277990870372472 | 0.2978881234633143 |
| 0.3193337457194613 | 0.1695946758109956 | 0.1722490631219212 |
| 0.5779804883204218 | 0.5550486109454096 | 0.3548840525803852 |
| 0.6958152133798692 | 0.5267977043985760 | 0.2054926685183534 |
| 0.7180630078261626 | 0.5575672881331108 | 0.9887668041012615 |
| 0.8770615430392681 | 0.5688623613164427 | 0.9941245658482067 |
| 0.9346993850989903 | 0.5304466237741350 | 0.2028058446140454 |
| 0.8187596766719508 | 0.5560812926651908 | 0.3391591237323556 |
| 0.5799799216551116 | 0.3280085946475076 | 0.3386777594212245 |
| 0.6995494989953590 | 0.3683685643565860 | 0.1978164027391810 |
| 0.7316010309566214 | 0.3219559117662397 | 0.9821565146138402 |
| 0.8861316001062225 | 0.3291266946557995 | 0.9956680144620489 |
| 0.9372551027402810 | 0.3725264339870591 | 0.2055567457315471 |
| 0.8208832547256343 | 0.3312157139550165 | 0.3352488147813527 |
| 0.9232489120419100 | 0.4470047545048139 | 0.8578466994418575 |
| 0.8022955328730537 | 0.4702155263309368 | 0.7153500273582092 |
| 0.7794954144068915 | 0.4387997998297987 | 0.4904436809784781 |
| 0.6184158619645928 | 0.4335821929931683 | 0.4963104873209192 |
| 0.5669459366242537 | 0.4702736902122679 | 0.7103599866049737 |
| 0.6785102170545330 | 0.4354391014645709 | 0.8499056592185659 |
| 0.7991917209949093 | 0.6298427205796608 | 0.6916328498879515 |
| 0.7664714574827188 | 0.6670145836553824 | 0.4720002233136956 |
| 0.6116877044301661 | 0.6720502692338054 | 0.4863692896226773 |
| 0.5647467650367699 | 0.6289763366191647 | 0.7041876086587552 |
| 0.6816119212708439 | 0.6709609053395176 | 0.8291085310785770 |
| 0.5791714514276984 | 0.9412856307529925 | 0.3496930599916792 |
| 0.6952646409961597 | 0.9724880153817610 | 0.2051989430645612 |
| 0.7226025806155428 | 0.9417986572915604 | 0.9845359441137677 |
| 0.8797779798080757 | 0.9443572243977043 | 0.9863751424416251 |
| 0.9358780148643724 | 0.9686899241585737 | 0.1984737920325074 |
| 0.8191549684073538 | 0.9363445208025296 | 0.3300118779526362 |
| 0.5824278969638813 | 0.1742016468520395 | 0.3249509499746335 |

**Structure files (CONTCAR) involved in this work:**

|                    |                    |                    |
|--------------------|--------------------|--------------------|
| 0.6982159715285716 | 0.1304983308314904 | 0.1901871042226124 |
| 0.7384255176707063 | 0.1634349932957350 | 0.9721999034268236 |
| 0.8932725937210535 | 0.1750542781863139 | 0.9828440740856125 |
| 0.9399542636738347 | 0.1271182742560856 | 0.1977442401807293 |
| 0.8205034198771215 | 0.1735204245082245 | 0.3223040489612501 |
| 0.9242288305663159 | 0.0630423695004030 | 0.8435471831570427 |
| 0.8096302674170101 | 0.0289306330540891 | 0.6961351548543885 |
| 0.7839888469704694 | 0.0585273175279139 | 0.4759494703338447 |
| 0.6239869014765979 | 0.0662147553429836 | 0.4825488357828700 |
| 0.5682996013446387 | 0.0321221667555426 | 0.6927653142431216 |
| 0.6850675581330806 | 0.0542548574481964 | 0.8259835239167453 |
| 0.9179827527698062 | 0.8319235038839176 | 0.8282215402901099 |
| 0.8070603964468392 | 0.8714305142409745 | 0.6836296288135979 |
| 0.7685219525174388 | 0.8278214347959002 | 0.4704878630895988 |
| 0.6132845608907328 | 0.8263303481895650 | 0.4891769004309509 |
| 0.5643223953660831 | 0.8741612202907895 | 0.7005643830902673 |
| 0.4236984658852660 | 0.4428687496161847 | 0.6517783215446137 |
| 0.3059116030523798 | 0.4723384655523180 | 0.7967637438798946 |
| 0.2832788147835284 | 0.4378523248826326 | 0.0180120716052687 |
| 0.1229220989439496 | 0.4332811364931591 | 0.0156346814114408 |
| 0.0694719568811941 | 0.4680672746121832 | 0.8043336762217255 |
| 0.1820283698505371 | 0.4431044173757838 | 0.6632133676073163 |
| 0.4204050261267511 | 0.6733814003189570 | 0.6694701439262617 |
| 0.3063852520880597 | 0.6307177363010905 | 0.8127476335759288 |
| 0.2687776141384446 | 0.6710408815272100 | 0.0299708929956011 |
| 0.1146987311535501 | 0.6726845607894180 | 0.0118750662906628 |
| 0.0667357456035764 | 0.6260115712882129 | 0.7996108936027702 |
| 0.1858216053290642 | 0.6697960973605822 | 0.6746041867640609 |
| 0.0788270704700234 | 0.5577293829571560 | 0.1488736820648485 |
| 0.1959480386998772 | 0.5287952121765428 | 0.2950123158232958 |
| 0.2213439100908773 | 0.5605705885992389 | 0.5159158477747279 |
| 0.3808114377842413 | 0.5642245450703930 | 0.5128717276708048 |
| 0.4347243680035626 | 0.5299772711325955 | 0.3013844311829849 |
| 0.3209911554347650 | 0.5573668156367897 | 0.1626218201401799 |
| 0.0814863532811279 | 0.3259964861256721 | 0.1728603400634428 |
| 0.1973737750819072 | 0.3705416810254316 | 0.3114828350702614 |
| 0.2361177350421821 | 0.3302499001432591 | 0.5294358361142735 |
| 0.3909266760982872 | 0.3267876890167707 | 0.5161032859524095 |
| 0.4381267092105492 | 0.3722039564179800 | 0.3020337907053834 |
| 0.3193739784217841 | 0.3284056890201730 | 0.1761617141460500 |
| 0.3585295407092886 | 0.0628812467503435 | 0.7150818665935649 |
| 0.3100780604860690 | 0.0663354078659623 | 0.8981341946129174 |
| 0.2004509665171208 | 0.0555168751766691 | 0.0104761562281499 |
| 0.0935424066566578 | 0.0708462527933267 | 0.8941185352003610 |
| 0.1061608401680141 | 0.0576766535880829 | 0.6970265159837369 |
| 0.2307500063016003 | 0.0346983713713154 | 0.7473976047976701 |
| 0.3595957409503421 | 0.8274662628771182 | 0.7451948746875889 |
| 0.3081604499683688 | 0.8440563212829929 | 0.9234159495098591 |
| 0.1913924445962657 | 0.8533195396381688 | 0.0159400386866563 |
| 0.0877921320500775 | 0.8305371925644199 | 0.8987362444788060 |
| 0.1063005426708082 | 0.8419814889639938 | 0.7034308232660240 |
| 0.2307010671776242 | 0.8566303488053877 | 0.7638308984904021 |
| 0.3240939118992403 | 0.9488843555744962 | 0.8035271433567347 |

**Structure files (CONTCAR) involved in this work:**

|                    |                    |                    |
|--------------------|--------------------|--------------------|
| 0.0825117896963523 | 0.9510283996367292 | 0.8133884658533573 |
| 0.4336512063445074 | 0.1246500148557532 | 0.5806331434147984 |
| 0.4178843786274218 | 0.9933133600849019 | 0.5670226075344538 |
| 0.3961372744290642 | 0.8616599395615023 | 0.5611486705085748 |
| 0.2011498698894989 | 0.1305422832712466 | 0.6155527407390550 |
| 0.1865068959045617 | 0.0019067470636184 | 0.5650851446755346 |
| 0.2010581192632386 | 0.8677918537199639 | 0.5695865522247873 |
| 0.9889457534412665 | 0.0442610645709979 | 0.7763529409176452 |
| 0.9867663495950284 | 0.8612027295472819 | 0.7822892442390524 |
| 0.1457237490955763 | 0.9366266384298769 | 0.2144082266832964 |
| 0.1912745406402790 | 0.9315780293743743 | 0.3987793872849599 |
| 0.3003125647549125 | 0.9478675933715603 | 0.5109841217534300 |
| 0.4062355725541706 | 0.9285339485989458 | 0.3939406624236347 |
| 0.3974123216067162 | 0.9456193447772691 | 0.1965724573017575 |
| 0.2728123106097096 | 0.9644945672929355 | 0.2507964468086438 |
| 0.1455987781235504 | 0.1704687644929192 | 0.2416043052840171 |
| 0.1948985219863140 | 0.1569387568338697 | 0.4213694154494548 |
| 0.3122602137487593 | 0.1479479643911347 | 0.5105586788875611 |
| 0.4174609871515428 | 0.1713297375524405 | 0.3956504048286388 |
| 0.3971398021901112 | 0.1556335936456385 | 0.2013774635751372 |
| 0.2733571370950231 | 0.1397199957763819 | 0.2627376288368737 |
| 0.1786695225974206 | 0.0497916988149046 | 0.3063408850600567 |
| 0.4214786642833631 | 0.0491942771518007 | 0.3176515992077890 |
| 0.0687798109836148 | 0.8731347002148183 | 0.0850851604642733 |
| 0.0849979263989407 | 0.0042432920497344 | 0.0658125513881216 |
| 0.1003325190816724 | 0.1366768913011309 | 0.0619395032091742 |
| 0.3037962784393012 | 0.8697700509766534 | 0.1178146876754544 |
| 0.3126366315626717 | 0.9983667032255726 | 0.0668135510642527 |
| 0.3017660844070030 | 0.1326789098077375 | 0.0673441234869869 |
| 0.5134774366716135 | 0.9538132906079090 | 0.2812935350765446 |
| 0.5178443041433528 | 0.1364596968336166 | 0.2767751889762963 |
| 0.6448754930903448 | 0.5584617205250638 | 0.2865882657622771 |
| 0.6867974746004262 | 0.5667719475413475 | 0.1000752891730938 |
| 0.7984943967894721 | 0.5495895056284797 | 0.9961281427515463 |
| 0.9067098265039277 | 0.5718008711228068 | 0.1065076686798458 |
| 0.8961939471908282 | 0.5546449632035645 | 0.3031814986291646 |
| 0.7722378179641350 | 0.5361820737007237 | 0.2437621726759673 |
| 0.6461425617566751 | 0.3322795409758070 | 0.2700036715852772 |
| 0.6950449568697596 | 0.3329632308027969 | 0.0891560359261074 |
| 0.8077010524449720 | 0.3508513213024643 | 0.9895794457086088 |
| 0.9116246770763802 | 0.3284648380534274 | 0.1107725196169963 |
| 0.8982790423215220 | 0.3470061276907962 | 0.3053989141906908 |
| 0.7741313835814976 | 0.3592757337551764 | 0.2442765316946348 |
| 0.6810271349159920 | 0.4475307012302866 | 0.1882031605066749 |
| 0.9213062059974074 | 0.4510742333717800 | 0.1828580333025086 |
| 0.5665946521601510 | 0.6262786030946348 | 0.4117966254092901 |
| 0.5832355231517716 | 0.4958841319826214 | 0.4381933920066655 |
| 0.5950231019963081 | 0.3631463015959656 | 0.4460154262135245 |
| 0.8005509014958530 | 0.6317566089142017 | 0.3750954727429481 |
| 0.8084248290228171 | 0.5029835521101148 | 0.4295559292466173 |
| 0.8029562416593257 | 0.3686990386318545 | 0.4394188829862091 |
| 0.0135077231222364 | 0.5461407155413924 | 0.2188420133586579 |
| 0.0169663667785589 | 0.3629772029656798 | 0.2225403338231435 |

**Structure files (CONTCAR) involved in this work:**

|                    |                    |                    |
|--------------------|--------------------|--------------------|
| 0.8591812495940019 | 0.4362412670468622 | 0.7855163250695463 |
| 0.8091204984117737 | 0.4407566305944099 | 0.6029839214708548 |
| 0.6986501648397530 | 0.4427906609366118 | 0.4899479463414738 |
| 0.5944357849387608 | 0.4321701182802935 | 0.6114408834290336 |
| 0.6024605448457387 | 0.4389616649312190 | 0.8088780807010297 |
| 0.7287639993033955 | 0.4506514983318047 | 0.7574618911399343 |
| 0.8533883163019115 | 0.6755667736589817 | 0.7452096087254206 |
| 0.8030925643779899 | 0.6393970165872565 | 0.5714426644350777 |
| 0.6882506751340761 | 0.6455781984299838 | 0.4782120476002786 |
| 0.5861116261825033 | 0.6653277838070805 | 0.6007030068891186 |
| 0.6031290294720211 | 0.6650490814257426 | 0.7982065983738440 |
| 0.7241091581204196 | 0.6509309245010648 | 0.7303466691400987 |
| 0.8113960639504844 | 0.5509195878912425 | 0.7187188219270110 |
| 0.5847270401453937 | 0.5498824945158537 | 0.7013846159970822 |
| 0.9300942987571621 | 0.3821097620131141 | 0.9311478886930501 |
| 0.9166075865207900 | 0.5149278357378247 | 0.9255547670447162 |
| 0.8875166888712412 | 0.6440854938823367 | 0.9462377520190112 |
| 0.6915436361793551 | 0.3610917868799319 | 0.8947347086618297 |
| 0.6876080234246869 | 0.4905914402804064 | 0.9383765942058113 |
| 0.6992689967525167 | 0.6242302513401290 | 0.9251585448500447 |
| 0.4873374295028258 | 0.4576655734721153 | 0.7235572298881612 |
| 0.4847283133461534 | 0.6363058063904846 | 0.7196768438486554 |
| 0.6435192169001196 | 0.9320969420468261 | 0.2764911398196687 |
| 0.6835413524930661 | 0.9490984283691813 | 0.0902136004258810 |
| 0.8008216745579465 | 0.9607149926934171 | 0.9984092631885182 |
| 0.9136661395906673 | 0.9326667420705795 | 0.0944871364609000 |
| 0.8961194364787624 | 0.9358575343962016 | 0.2920069223310247 |
| 0.7717415002323067 | 0.9543546045864714 | 0.2347164627249017 |
| 0.6407626124421048 | 0.1769718295531246 | 0.2402982204608999 |
| 0.6968333950685238 | 0.1389177430395702 | 0.0699042084069237 |
| 0.8172052355083602 | 0.1457233737092756 | 0.9860469541495852 |
| 0.9258441711273919 | 0.1648133250202876 | 0.0924078913065334 |
| 0.8975054951137946 | 0.1627561391439794 | 0.2868422171921028 |
| 0.7716788980867073 | 0.1533229909038536 | 0.2294757393862184 |
| 0.6827316133656910 | 0.0526838488878256 | 0.2198306422718943 |
| 0.9188473716110767 | 0.0484979965396151 | 0.1905158945962224 |
| 0.5690173183709627 | 0.8733365026715274 | 0.4150857274509264 |
| 0.5880910180764184 | 0.0045341938941136 | 0.4246267304555100 |
| 0.6093229410095833 | 0.1360562667782997 | 0.4241607453490230 |
| 0.7997642314099682 | 0.8621884683124218 | 0.3708075458840272 |
| 0.8106603694893463 | 0.9928361083127946 | 0.4164538739112446 |
| 0.8039765562428123 | 0.1274864329055835 | 0.4188588832860858 |
| 0.0150015399964419 | 0.9558825553324913 | 0.2173661722251455 |
| 0.0193550638826532 | 0.1338872195466925 | 0.2221004254722454 |
| 0.8586712224577314 | 0.0683517678047316 | 0.7729733787679141 |
| 0.8191474279820327 | 0.0601721662743260 | 0.5851488778839765 |
| 0.7036671036635295 | 0.0528124076025165 | 0.4875280797541888 |
| 0.5927678335652010 | 0.0725499806871644 | 0.5936141786264260 |
| 0.6083682527390246 | 0.0611740473584557 | 0.7892336089978358 |
| 0.7322439324735018 | 0.0391327947951761 | 0.7297687730713165 |
| 0.8643308445273541 | 0.8269519923636558 | 0.7392183325403515 |
| 0.8113279146906816 | 0.8535352908851409 | 0.5654889581371360 |
| 0.6908773491152588 | 0.8505798338330386 | 0.4828515677821996 |

**Structure files (CONTCAR) involved in this work:**

0.5867026242190957 0.8301911723974221 0.6029094279457717  
0.6014879518806706 0.8475938918428522 0.7994543492576128  
0.7347146378309044 0.8554275155847272 0.7284274172555087  
0.8286496371618675 0.9498770669065087 0.6993837185485852  
0.5825821055048916 0.9526143701336449 0.6770846471106476  
0.9358476746148419 0.1349362984595760 0.8984690654196782  
0.9159827210483464 0.0063391951236784 0.9303143588899735  
0.8895638128860310 0.8760539086188183 0.9215534435254514  
0.7083188145271448 0.1241832632297536 0.8767572291115244  
0.6888873766949239 0.9915069142385763 0.9037102717545847  
0.7149543725078468 0.8641798810776150 0.9435670854840693  
0.4895282300906296 0.0457390729640427 0.7140681010557507  
0.4834457764544177 0.8669616004348339 0.7131188206503842  
0.3570070387419522 0.4361842801440245 0.7197860544827672  
0.3113836353535174 0.4352980939110543 0.9044052061327001  
0.2027417287679278 0.4463464588060933 0.0195065358173858  
0.0972556423814198 0.4275564269822864 0.9014018935574789  
0.1057556850955726 0.4400481118762657 0.7039619002137653  
0.2299107161538784 0.4652893231134803 0.7558326402384833  
0.3608980249546603 0.6740219884795341 0.7512902691695226  
0.3094749987052304 0.6543091828965896 0.9282831963867221  
0.1916486321800223 0.6464931850077253 0.0178910347626559  
0.0892562745597168 0.6694292517604506 0.8975940348271174  
0.1086988384856322 0.6537331067641636 0.7032295185226833  
0.2322650612982345 0.6447438348117663 0.7676922308728568  
0.3251936708596338 0.5514625977425138 0.8048357634863986  
0.0855123207128382 0.5473590765483022 0.8196298539907345  
0.4347934038580878 0.3725289662881289 0.5921851947749978  
0.4184524622437199 0.5034016225398957 0.5707036713153949  
0.3957868191482882 0.6349175251437233 0.5688708779661878  
0.2028880712357663 0.3691345334088224 0.6233070203747666  
0.1869890887742019 0.4975957983611086 0.5732638107823286  
0.2062256864638261 0.6310134104670770 0.5722527053820016  
0.9900391081960397 0.4539247570377411 0.7904713284545508  
0.9885153701753528 0.6356438824958444 0.7806993990362540  
0.1442520647078155 0.5656483253436630 0.2194685845745199  
0.1902577057846327 0.5640786331372657 0.4039359979958492  
0.3014529106437888 0.5480843266544111 0.5111874223037989  
0.4098196939986061 0.5701270563024544 0.4002721608453863  
0.3972275904316958 0.5591447803708450 0.2032837499749470  
0.2720171392149690 0.5367487578027876 0.2546285264645459  
0.1420867028041501 0.3259649602276509 0.2532132102608539  
0.1960041300084807 0.3494557248444883 0.4281179326808994  
0.3138107259581139 0.3529105423847549 0.5169199773575296  
0.4200431453048661 0.3318367290006863 0.4036081942851129  
0.3969491078393704 0.3398852998487947 0.2088266766168922  
0.2714157459234878 0.3564767976824786 0.2655258093180299  
0.1775064388705563 0.4493087687270606 0.3000345106799092  
0.4178755575363177 0.4506022589328121 0.3154050175944534  
0.0685641365887327 0.6262657819127991 0.0843097465188376  
0.0854360309934706 0.4949222417491387 0.0719899503057030  
0.1046392300244338 0.3630743425176888 0.0706317447330506  
0.3027163971789675 0.6318922802444322 0.1228354655983306

**Structure files (CONTCAR) involved in this work:**

```

0.3157708825264977 0.5027841780645497 0.0729174472959054
0.3043779902073963 0.3682736735374817 0.0727837054336792
0.5141984027391204 0.5410703595725729 0.2831949594714152
0.5179820229509172 0.3647738889592975 0.2812157254338254
0.4397620706390319 0.7498146445894878 0.6397919467874559
0.1968915264204824 0.7493712037196464 0.6545704011386468
0.2723415461774010 0.7503747786625301 0.0545045616965784
0.1089653056696548 0.7496886914770967 0.0514038311784024
0.0620635977619388 0.2493842077945292 0.1444736071211312
0.3055435807167682 0.2492114065090199 0.1573372526795194
0.2310005942493176 0.2506215346050518 0.5519113325024068
0.3954717515069573 0.2491981171294495 0.5523183948921764
0.5621131004404371 0.2497936107851173 0.3580270444097378
0.8089103672547359 0.2515037232671052 0.3525714360092438
0.7302972554478744 0.2431984498844917 0.9534424044328389
0.8950809520267060 0.2537749488795881 0.9515416270538465
0.9266583261551147 0.7567913426493278 0.8779168530798855
0.6990829095088917 0.7472985850852731 0.8694203841721007
0.7741239019607632 0.7472039733645326 0.4585388172725917
0.6063248004268521 0.7493978103608916 0.4500214461112833
0.8216493959736468 0.7801498487339268 0.0978548022631675
0.9187518906270902 0.6734384462193436 0.8267283247576808
0.6840074986277694 0.8321231722208610 0.8257333425030232
0.8643243320688230 0.7389045325540911 0.9970969802706318
0.7437515711963345 0.7725060202073003 1.0033034054016483
0.6998291837403188 0.7441206934340113 0.1482231080420904
0.7178112123600519 0.7100233111570179 0.2072994843866929
0.6614391384247985 0.7156221716474397 0.1068848739528634
0.6767730133385508 0.7885424295733533 0.1828084882588411
0.7704895937935965 0.7606141260977268 0.1338120651690392

```

**Figure 1(b) Ga/ZSM-5**

```

1.0000000000000000
 20.0219993591000005 0.0000000000000000 0.0000000000000000
 0.0000000000000000 19.8990001678000006 0.0000000000000000
 0.0000000000000000 0.0000000000000000 13.3830003737999998
Si O Al Ga H C
94 192 2 1 5 1

```

**Direct**

```

0.4224751064944764 0.0582089579760333 0.6482505988448554
0.3051207303668143 0.0290087195617479 0.7931755222206042
0.2814524247497194 0.0573973157256899 0.0162989618795743
0.1214164180986371 0.0631223049634646 0.0113074932842919
0.0669223026077090 0.0287309634525345 0.7993065700657161
0.1805494581053215 0.0597185765146836 0.6620036393638562
0.4210586796117458 0.8273792794891354 0.6729645934929676
0.3032647339271743 0.8700315238843989 0.8083834216216683
0.2674528456943518 0.8298960438734234 0.0277306072912525
0.1124505573841544 0.8265301934469979 0.0177770132809332
0.0639579713410862 0.8701897284650328 0.8028638430733057
0.1810528510654405 0.8265842575537866 0.6741154559770649
0.0767500653049010 0.9421782647996908 0.1512610840714638
0.1948151667405718 0.9704763692902777 0.2957671635278590
0.2180479700265464 0.9382154233583777 0.5179303203505103

```



**Structure files (CONTCAR) involved in this work:**

|                    |                    |                    |
|--------------------|--------------------|--------------------|
| 0.3786845039150170 | 0.9326906207685125 | 0.5149901467597305 |
| 0.4342185013805983 | 0.9682222875078706 | 0.3037753536085566 |
| 0.3200282821116666 | 0.9394160834073464 | 0.1651351481320687 |
| 0.0813118590442458 | 0.1741485534633937 | 0.1638170113074113 |
| 0.1960369655204118 | 0.1297737458785334 | 0.3062805556967226 |
| 0.2315816424982818 | 0.1709386974304211 | 0.5238811299341821 |
| 0.3863400128356535 | 0.1732257192263343 | 0.5100806284895897 |
| 0.4368354195432406 | 0.1269395918461324 | 0.2990171157796848 |
| 0.3183845367040073 | 0.1686879183189364 | 0.1712097795859973 |
| 0.5831953767062337 | 0.5552568766818329 | 0.3496180640719931 |
| 0.6963803731759126 | 0.5310721501115045 | 0.1914543249162704 |
| 0.7176297046096674 | 0.5658230151860708 | 0.9754691359545897 |
| 0.8747493280430428 | 0.5634328986163116 | 0.9831919134723643 |
| 0.9295891105823697 | 0.5289274234624258 | 0.1933330404714893 |
| 0.8163406028003912 | 0.5576992609636363 | 0.3337783296729415 |
| 0.5763924201944893 | 0.3310802830823562 | 0.3305467218630859 |
| 0.7040836178877745 | 0.3761033776440643 | 0.2042006195776160 |
| 0.7334801682940665 | 0.3274410026968021 | 0.9884525668124082 |
| 0.8859601151235060 | 0.3266050071817459 | 0.9763503839331134 |
| 0.9394213617575031 | 0.3720842867302931 | 0.1870132864334544 |
| 0.9301195014562779 | 0.4439302711558807 | 0.8480338242690565 |
| 0.7822574991670229 | 0.4378100131228906 | 0.4827342912800723 |
| 0.6237862474110160 | 0.4306458073576230 | 0.4891464729431200 |
| 0.5706642935749431 | 0.4676887811834138 | 0.7027998807845720 |
| 0.6716724157778741 | 0.4382953430654104 | 0.8589800952237170 |
| 0.9194907519258515 | 0.6733772804177975 | 0.8303095524831754 |
| 0.8012170660731257 | 0.6404694255766763 | 0.6903330518860091 |
| 0.7682399301935874 | 0.6698165386337281 | 0.4694492751003814 |
| 0.6132406908769990 | 0.6713898614908126 | 0.4845730634401426 |
| 0.5670269607829281 | 0.6261421693539696 | 0.7023241946083006 |
| 0.6839872366683757 | 0.6824319006965448 | 0.8236576961361263 |
| 0.5780499376759148 | 0.9441264888623706 | 0.3601423071420847 |
| 0.6969676725841920 | 0.9745223496693687 | 0.2175877973904832 |
| 0.7203412945220409 | 0.9437761934927233 | 0.9951345237576632 |
| 0.8801310419596937 | 0.9347859129940768 | 0.9951776272936463 |
| 0.9326301196905298 | 0.9719548768069252 | 0.2053976173645000 |
| 0.8216128279004651 | 0.9453988826071209 | 0.3527661310713929 |
| 0.5805577792776491 | 0.1756014814619576 | 0.3291209361008327 |
| 0.6974453526054334 | 0.1314399481629434 | 0.1933796530083313 |
| 0.7328606173178903 | 0.1711426877560820 | 0.9724797647215574 |
| 0.8873953917170143 | 0.1732253461051501 | 0.9846131565389676 |
| 0.9356232392405768 | 0.1304950801542015 | 0.1986269266042245 |
| 0.8189029372794504 | 0.1719484932374687 | 0.3312357357975975 |
| 0.9239081070695679 | 0.0548546268371425 | 0.8563404424549302 |
| 0.8036304086477715 | 0.0270400702835780 | 0.7125958357892047 |
| 0.7816146140564718 | 0.0630395234963458 | 0.4927104579314897 |
| 0.6214340547000350 | 0.0696416335272230 | 0.4897587505968302 |
| 0.5681487121619340 | 0.0333709771845097 | 0.6984906801475560 |
| 0.6792991455028208 | 0.0568886201469749 | 0.8477016781902679 |
| 0.9195348701204301 | 0.8265879457446027 | 0.8395164695301152 |
| 0.8031576069193223 | 0.8695526230490959 | 0.6963943992466767 |
| 0.7683199377256933 | 0.8281104791359981 | 0.4781230482026006 |
| 0.6136053856950670 | 0.8264825907099662 | 0.4939637333617700 |

**Structure files (CONTCAR) involved in this work:**

|                    |                    |                    |
|--------------------|--------------------|--------------------|
| 0.5637187618341964 | 0.8769570077764658 | 0.7004710105017460 |
| 0.6792509798977191 | 0.8376189530282354 | 0.8349600801368843 |
| 0.4221006717419525 | 0.4417574385675413 | 0.6444426696508797 |
| 0.3106216301150390 | 0.4677590512495958 | 0.7967912764932081 |
| 0.2854655464136731 | 0.4407357189139128 | 0.0189968908024840 |
| 0.1296626824026698 | 0.4363748034825995 | 0.0099410185093868 |
| 0.0770610100476022 | 0.4730138955937023 | 0.8020467523636666 |
| 0.1882363480440679 | 0.4438108465208395 | 0.6598870872091426 |
| 0.4248616399459207 | 0.6731587360373648 | 0.6710205699064669 |
| 0.3045208645859788 | 0.6263559559364951 | 0.8011125237272010 |
| 0.2685328637023648 | 0.6698913682550508 | 0.0219296086785847 |
| 0.1142286652619126 | 0.6735959287711895 | 0.0141292787474871 |
| 0.0664985543365332 | 0.6298448784508097 | 0.8043766182347797 |
| 0.1804964218685262 | 0.6684875249986164 | 0.6665384105486180 |
| 0.0755289478668218 | 0.5551185444109756 | 0.1425436133009946 |
| 0.1956986396773009 | 0.5279084336145872 | 0.2862144340608820 |
| 0.2208830446637998 | 0.5640977598562603 | 0.5077412118454913 |
| 0.3811484475325984 | 0.5705533537146452 | 0.5106274651850807 |
| 0.4366451546477451 | 0.5285300035869391 | 0.3023296406790820 |
| 0.3252245024175405 | 0.5595413846145840 | 0.1604834286347590 |
| 0.0860262861000736 | 0.3276120525679738 | 0.1578604405651143 |
| 0.1961498948541907 | 0.3682970286196736 | 0.3062412761928500 |
| 0.2317807778323777 | 0.3306409793227688 | 0.5239996610650843 |
| 0.3862177892707989 | 0.3269307308616438 | 0.5068148689094621 |
| 0.4331429247514615 | 0.3719609486496760 | 0.2942967655701555 |
| 0.3157912154805621 | 0.3261860080362467 | 0.1706853936351138 |
| 0.3579919999573624 | 0.0666696044665282 | 0.7206397408806617 |
| 0.3135178780192889 | 0.0583829821023577 | 0.9051729936705232 |
| 0.2010462409960014 | 0.0488481531836566 | 0.0112634071010096 |
| 0.0934874659110034 | 0.0674268839511196 | 0.8982339144989793 |
| 0.1039460265393060 | 0.0589346799758076 | 0.7012307172009286 |
| 0.2292185767890602 | 0.0433313003985494 | 0.7561883245484917 |
| 0.3603420847604207 | 0.8258875312801244 | 0.7533224659683373 |
| 0.3054307874948255 | 0.8537065821553346 | 0.9266939417199840 |
| 0.1894799551342845 | 0.8527795930268502 | 0.0214984113823892 |
| 0.0856076433878104 | 0.8309573303158054 | 0.9039695018451430 |
| 0.1036402026121706 | 0.8371112067728722 | 0.7084805003763154 |
| 0.2295603567274656 | 0.8513575393758769 | 0.7649148776542720 |
| 0.3197224361998203 | 0.9487722626283307 | 0.7889836253566518 |
| 0.0834676054661527 | 0.9491149894284270 | 0.8113846218146490 |
| 0.4313272347204031 | 0.1264916785441030 | 0.5828854356501874 |
| 0.4140669109403488 | 0.9945430744091862 | 0.5734811378417699 |
| 0.3962945921151518 | 0.8619651033581216 | 0.5693849357440598 |
| 0.1969196242832587 | 0.1338323276881853 | 0.6181769674310899 |
| 0.1890800094606553 | 0.0036703772717846 | 0.5752336348919711 |
| 0.1959761465421719 | 0.8691015735637018 | 0.5731536894957923 |
| 0.9875322390656230 | 0.0416839527568795 | 0.7837468584453032 |
| 0.9838489678192125 | 0.8623688318311605 | 0.7868019999807749 |
| 0.1423550615387562 | 0.9339702702254111 | 0.2213627142022840 |
| 0.1869586051265212 | 0.9377736770844419 | 0.4060418470042835 |
| 0.2986429731734962 | 0.9440773944237096 | 0.5142541602193925 |
| 0.4069075895255462 | 0.9289289620265796 | 0.4019636494017426 |
| 0.3964277629815239 | 0.9396533397969709 | 0.2052290892024336 |

**Structure files (CONTCAR) involved in this work:**

|                    |                    |                    |
|--------------------|--------------------|--------------------|
| 0.2709576461515967 | 0.9585840888742643 | 0.2578189077690500 |
| 0.1414218013594659 | 0.1732139197057036 | 0.2450915120815335 |
| 0.1917599886136588 | 0.1514362106977023 | 0.4225752092067562 |
| 0.3091190866546584 | 0.1472705649755203 | 0.5136837678476504 |
| 0.4140943443461348 | 0.1694292321599189 | 0.3967524239047094 |
| 0.3958122490491487 | 0.1551294730551210 | 0.2025283126067384 |
| 0.2708119597387723 | 0.1450995176836653 | 0.2639178933225769 |
| 0.1785919452337658 | 0.0504825795715123 | 0.2955528955128054 |
| 0.4195215304794896 | 0.0481497402916037 | 0.3169083889206623 |
| 0.0661971820411140 | 0.8722435899155824 | 0.0903929276241988 |
| 0.0845498044840172 | 0.0027181272006808 | 0.0708477325903067 |
| 0.1045363060527988 | 0.1343483395648800 | 0.0639519059592051 |
| 0.3026940446282721 | 0.8648599763777637 | 0.1235022426776218 |
| 0.3125788664398785 | 0.9939408701262639 | 0.0759115577480171 |
| 0.3003323481544791 | 0.1275880348872481 | 0.0703950377013209 |
| 0.5134399620088427 | 0.9543763825997381 | 0.2884005090698621 |
| 0.5163770285477032 | 0.1370950148548461 | 0.2801855126444825 |
| 0.6438356524836475 | 0.5622420877260177 | 0.2708152253801387 |
| 0.6917899523933295 | 0.5755323357774283 | 0.0897737565125907 |
| 0.7962782149765860 | 0.5434244879970584 | 0.9768021799073938 |
| 0.8999693127727370 | 0.5707246454718399 | 0.0980015071879124 |
| 0.8938315962915655 | 0.5509487876073196 | 0.2981790192183250 |
| 0.7710067333508970 | 0.5393426882126815 | 0.2377706142359299 |
| 0.6413921522893604 | 0.3412737927733141 | 0.2616201052835326 |
| 0.7190999262624276 | 0.3290203937031066 | 0.1072362133654793 |
| 0.8095301579288668 | 0.3545127512676819 | 0.9653915177023330 |
| 0.9122570709445105 | 0.3310513633318801 | 0.0897746042834432 |
| 0.9097238897414911 | 0.3401952287322015 | 0.2870286606520024 |
| 0.7693655189164960 | 0.3799372453855431 | 0.2731191384315407 |
| 0.6818029755209253 | 0.4520505115105921 | 0.1688291147792930 |
| 0.9167708650286642 | 0.4501683770487829 | 0.1712831972968886 |
| 0.5705598067939545 | 0.6269839855931250 | 0.4048317679159352 |
| 0.6014513688895181 | 0.5002177689023143 | 0.4355666956364947 |
| 0.5861715391597140 | 0.3673010177438216 | 0.4389104691941279 |
| 0.8022251525927639 | 0.6332646346410050 | 0.3734374459202811 |
| 0.8013598511921806 | 0.5072805885094855 | 0.4277741820322206 |
| 0.8338242935660896 | 0.3769518175669637 | 0.4497930130203363 |
| 0.0086488184844080 | 0.5446965904742430 | 0.2091462947942198 |
| 0.0208370114176899 | 0.3705176338829080 | 0.1897369580006401 |
| 0.8740898665402372 | 0.4411220295956276 | 0.7571155588542920 |
| 0.8060691672881384 | 0.4423172527136688 | 0.6011398019652633 |
| 0.7043319182519074 | 0.4202291005305708 | 0.4760434636099291 |
| 0.6058579427502707 | 0.4324205058924390 | 0.6065792152744434 |
| 0.5988606524073948 | 0.4341278003129264 | 0.8046483858218546 |
| 0.7302956796900092 | 0.4381661665657814 | 0.7773361657041082 |
| 0.8658041622990503 | 0.6769178231349587 | 0.7402192765469422 |
| 0.8086959550008541 | 0.6485424081177225 | 0.5698019801009335 |
| 0.6906959562145735 | 0.6460175774364653 | 0.4810821026954035 |
| 0.5840529761438302 | 0.6616149435741302 | 0.5963041326650801 |
| 0.6081549240614301 | 0.6620370041331642 | 0.7922103109976949 |
| 0.7322764514814624 | 0.6776832077821853 | 0.7255331608151927 |
| 0.7988340724543521 | 0.5633693739140719 | 0.7244299043440556 |
| 0.5880390911364731 | 0.5474694203991128 | 0.6979138376580204 |

**Structure files (CONTCAR) involved in this work:**

|                     |                    |                    |
|---------------------|--------------------|--------------------|
| 0.9333726028125119  | 0.3715796978109622 | 0.9027282811951904 |
| 0.9160301051923212  | 0.5034447285765522 | 0.9267148964177460 |
| 0.8892705470388439  | 0.6338354422783460 | 0.9265834108221986 |
| 0.6788292545412085  | 0.3734539845871483 | 0.9318360978350564 |
| 0.6731791766745353  | 0.5075196722864320 | 0.9241630783117911 |
| 0.7102335338654834  | 0.6359094075267854 | 0.9150536694063324 |
| 0.4906840534464637  | 0.4568469527821100 | 0.7033283364895658 |
| 0.4873642156282867  | 0.6345645935340729 | 0.7240743495726831 |
| 0.6443050422684510  | 0.9374281110814248 | 0.2912108190382899 |
| 0.6964561049711893  | 0.9367990562624883 | 0.1102243514349141 |
| 0.8009819270969178  | 0.9512698251608408 | 0.9868643194336966 |
| 0.9029243685151352  | 0.9298072592931992 | 0.1110653045595423 |
| 0.8969790062643475  | 0.9477968724932071 | 0.3082528570357229 |
| 0.7715781681546319  | 0.9693975173995075 | 0.2640874087445160 |
| 0.6415153766664061  | 0.1764371779909210 | 0.2497468474377675 |
| 0.6961143892463471  | 0.1521181072118326 | 0.0764540708115751 |
| 0.8105166931460331  | 0.1469434339243944 | 0.9794427615310581 |
| 0.9129801020578349  | 0.1718949452519336 | 0.0993851685052987 |
| 0.8962445859483705  | 0.1585080707811554 | 0.2958276106404954 |
| 0.7709448749556549  | 0.1435300591891665 | 0.2410240231962502 |
| 0.6761659537774262  | 0.0528708362530998 | 0.2054346341149966 |
| 0.9194157525701061  | 0.0511059021881620 | 0.1830361638510395 |
| 0.5684237007507403  | 0.8751778217055498 | 0.4239426990244418 |
| 0.5824283141291451  | 0.0073703741181500 | 0.4369300097969819 |
| 0.6030592120405515  | 0.1392083769092894 | 0.4326868271724935 |
| 0.8045711826295595  | 0.8694772702219156 | 0.3889425514468512 |
| 0.8159539363029767  | 0.9952862677336397 | 0.4482924773726010 |
| 0.8059291977336346  | 0.1291390073048369 | 0.4334062609098977 |
| 0.01182194996433360 | 0.9567216437612798 | 0.2201662048376270 |
| 0.0156591942332251  | 0.1404487608984718 | 0.2147480319749966 |
| 0.8570040581811812  | 0.0602883994604127 | 0.7888795150485863 |
| 0.8044372706683901  | 0.0694092515960110 | 0.6089937004653818 |
| 0.7009748676022338  | 0.0551226536370943 | 0.4841177775198344 |
| 0.5975781242525408  | 0.0769800162941304 | 0.6053721930952991 |
| 0.6041115604524557  | 0.0541027363441189 | 0.8027653034730037 |
| 0.7293102977917232  | 0.0302002211548457 | 0.7606606743597070 |
| 0.8573658280716970  | 0.8288868313971223 | 0.7624337942705511 |
| 0.8061676896606519  | 0.8402221830893942 | 0.5837329204586909 |
| 0.6908380161572814  | 0.8520674035744527 | 0.4891127703147600 |
| 0.5871052245488402  | 0.8288395745491108 | 0.6086526161607860 |
| 0.6030623676176556  | 0.8552513179307452 | 0.8016128294854020 |
| 0.7289275326245962  | 0.8589289281491026 | 0.7435597866923397 |
| 0.8228213464127523  | 0.9487240424088268 | 0.6942807503935714 |
| 0.5807900445168149  | 0.9544463192579793 | 0.6723791161166300 |
| 0.9342323179078676  | 0.1254647108343482 | 0.9155201247783891 |
| 0.9204093106823070  | 0.9944136583341906 | 0.9380563597680616 |
| 0.8985941835971187  | 0.8633652285765276 | 0.9432685054321674 |
| 0.6966314524421269  | 0.1335828226186503 | 0.8793816701680326 |
| 0.6851728431330253  | 0.0096925294725266 | 0.9464730961312292 |
| 0.6973556510726838  | 0.8767221525430565 | 0.9369850530672920 |
| 0.4890868189057291  | 0.0479095461329499 | 0.7152144134080980 |
| 0.4839500135884268  | 0.8684878729821723 | 0.7200074866604610 |
| 0.3627930519685666  | 0.4286105438991686 | 0.7249124808632400 |

**Structure files (CONTCAR) involved in this work:**

|                    |                    |                    |
|--------------------|--------------------|--------------------|
| 0.3166317407242117 | 0.4357515245112096 | 0.9075431322320693 |
| 0.2068125133540262 | 0.4614133937688669 | 0.0151296014456967 |
| 0.1065847045728855 | 0.4290753904317536 | 0.8938994553465189 |
| 0.1111259005988866 | 0.4529154235443358 | 0.6960337599746321 |
| 0.2347219013324948 | 0.4568614810638483 | 0.7571223120536581 |
| 0.3604402216389470 | 0.6704897827696992 | 0.7441438372305826 |
| 0.3019768684096701 | 0.6513244051302972 | 0.9155804469938119 |
| 0.1906865041571380 | 0.6460502422173749 | 0.0216429617549006 |
| 0.0905578825053105 | 0.6752290506475018 | 0.8981678742194478 |
| 0.1039929612773625 | 0.6564267789504076 | 0.7041807212463728 |
| 0.2316159243087440 | 0.6367748009066430 | 0.7491274901108550 |
| 0.3266534615169092 | 0.5478310439358283 | 0.7964765187694347 |
| 0.0870544744629369 | 0.5521165592260557 | 0.8266745070869600 |
| 0.4323574871565155 | 0.3750741371453622 | 0.5761927388174560 |
| 0.4030060727272266 | 0.5049498153139521 | 0.5739637595598360 |
| 0.4068307616935819 | 0.6384435543878373 | 0.5647911067019181 |
| 0.1981006332372724 | 0.3676985161969052 | 0.6195675930008971 |
| 0.2046775318054788 | 0.4964907079161064 | 0.5712197788650795 |
| 0.1894757208309451 | 0.6303665620209825 | 0.5602522006216230 |
| 0.9984093395814292 | 0.4557510805658083 | 0.7857993408737316 |
| 0.9862559151766569 | 0.6352003393422170 | 0.7891429018486916 |
| 0.1401106563002989 | 0.5628140420681966 | 0.2149929523342553 |
| 0.1868848880327924 | 0.5570328467831790 | 0.3984645977190003 |
| 0.3008537939379217 | 0.5723572546580866 | 0.4985016798997723 |
| 0.4156519026592835 | 0.5690738281213198 | 0.4020370361489729 |
| 0.3998672063178205 | 0.5632526315519952 | 0.2073492918993110 |
| 0.2708870540998035 | 0.5445099128329250 | 0.2482506407826205 |
| 0.1384374132650235 | 0.3256513285519678 | 0.2504592390864983 |
| 0.1905810609458441 | 0.3528587658410978 | 0.4247814290746734 |
| 0.3093230461501004 | 0.3538338182248015 | 0.5121874843682402 |
| 0.4121288327994222 | 0.3286995778912180 | 0.3922820089052750 |
| 0.3931954904548946 | 0.3429433247243351 | 0.1976697024688528 |
| 0.2699449436392462 | 0.3464555193305226 | 0.2670119265523717 |
| 0.1833603803766194 | 0.4473440064827738 | 0.2839087710583261 |
| 0.4134565403658680 | 0.4503837001709943 | 0.3126051893692137 |
| 0.0664285022763931 | 0.6239712144854933 | 0.0783442423926618 |
| 0.0833848858023055 | 0.4920888420659493 | 0.0656103303900299 |
| 0.1213397245026069 | 0.3629960484441793 | 0.0613714241576007 |
| 0.3087917870225461 | 0.6314231336076590 | 0.1096446590441434 |
| 0.3250249591075799 | 0.4992149153497006 | 0.0787630915024907 |
| 0.2933259811802980 | 0.3681544482566648 | 0.0724392553443824 |
| 0.5169412571356219 | 0.5331029649538408 | 0.2880084667665928 |
| 0.5125386130298362 | 0.3643901137852806 | 0.2732707296884722 |
| 0.4437150199843711 | 0.7508802758595062 | 0.6491186922964627 |
| 0.1948457636287691 | 0.7478259821792618 | 0.6501972426966244 |
| 0.2736865160812274 | 0.7495980918011179 | 0.0421894940207341 |
| 0.1085444838787601 | 0.7494411029707355 | 0.0573690867923022 |
| 0.0657760451177321 | 0.2510126470108135 | 0.1301419673547047 |
| 0.3065279217136848 | 0.2473213376966333 | 0.1457607580083786 |
| 0.2265221078704959 | 0.2508807798350566 | 0.5431878259432353 |
| 0.3909411470629047 | 0.2505209439573423 | 0.5483609407333369 |
| 0.5610787402950456 | 0.2527509251601601 | 0.3538520869473345 |
| 0.8053508006877907 | 0.2494623091012813 | 0.3536284365466212 |

**Structure files (CONTCAR) involved in this work:**

0.7275953920410455 0.2507062007963207 0.9490720696933677  
0.8916748004373773 0.2491022519641215 0.9398728305558016  
0.9379531806977296 0.7490783411525264 0.8657268662259989  
0.6853706646037928 0.7589986024062624 0.8630392447734736  
0.7722694115162619 0.7495485870846462 0.4485259395127302  
0.6075176634858355 0.7498958491607205 0.4532433345876490  
0.8292204056980603 0.3309902293991626 0.3322762514663355  
0.7948056438200898 0.4786886295295543 0.7226123543994351  
0.8830583594953294 0.3839162335281219 0.6350546453952962  
0.8796330100223739 0.3086857134900834 0.6634321072703337  
0.9689640343300709 0.4541597624605470 0.5855167286006363  
-0.0101482309850990 0.3846369943444344 0.5063626023969712  
0.8926182747414301 0.3956043847004313 0.4876807989305228  
0.9436849110449153 0.4567459465124153 0.4629521943713741  
0.9505236320711836 0.4207458641249623 0.5250895707475980

**Figure 1(b) Mo/ZSM-5**

1.0000000000000000

20.0219993591000005 0.0000000000000000 0.0000000000000000

0.0000000000000000 19.8990001678000006 0.0000000000000000

0.0000000000000000 0.0000000000000000 13.3830003737999998

Si O Al C Mo H

94 192 2 3 4 4

## Direct

0.4238057369159199 0.0556641141216816 0.6539201333236233

0.3045510856640627 0.0288483804001982 0.7954091861024485

0.2816914096651573 0.0583120535931331 0.0206840018932936

0.1209353560783491 0.0660973542241235 0.0182362195599321

0.0660895877307872 0.0279762563977765 0.8070812084120190

0.1781873775617015 0.0621245640725604 0.6685407398058060

0.4169421767915013 0.8262161039028902 0.6649051528636958

0.3044646877636845 0.8696228886145124 0.8074657856180668

0.2708391068397729 0.8303806720617880 0.0254127663875445

0.1162115785501436 0.8252327727373509 0.0127595030989115

0.0676444443935749 0.8703349615116184 0.8003525449038394

0.1844649272056199 0.8269672231929588 0.6720943014221402

0.0788902199575717 0.9392251972856281 0.1510638679471225

0.1944427508183942 0.9675845330881940 0.2974472405164822

0.2174609403453819 0.9428226951109976 0.5206208422992459

0.3757293786233523 0.9349366555803849 0.5150607474873302

0.4329410230547366 0.9698013983278779 0.3049102431055295

0.3188171693095911 0.9373418664595159 0.1695062522561936

0.0797130357267514 0.1725668449101515 0.1753241814929526

0.1988241249099780 0.1264644111229638 0.3059509927653276

0.2324304943415167 0.1677842542937355 0.5256537156486044

0.3874146803614788 0.1711305530930090 0.5184675119962675

0.4361831546155991 0.1281649701026991 0.3049636526624563

0.3212404049217328 0.1708335929499591 0.1716292226788375

0.5793184843929474 0.5591313453848110 0.3497744102123150

0.6931921261204425 0.5276213027000866 0.2027324246972763

0.7181699280344629 0.5558916942158949 0.9804117982660007

0.8766492337956304 0.5668675991392950 0.9824092790780758

0.9340790630517440 0.5368625154204467 0.1911575439343347

0.8171863707434086 0.5640969775979812 0.3258177719959812

**Structure files (CONTCAR) involved in this work:**

0.5836637124432176 0.3264490383904173 0.3334456889648672  
0.6979224548159930 0.3705108955290792 0.1973294047726577  
0.7329946170720758 0.3291487756262661 0.9804422112298016  
0.8891355541444725 0.3261781251830111 0.9871738381376514  
0.9368941743929595 0.3785107017365117 0.1974026349943392  
0.8217912680880619 0.3332651927717141 0.3314543649984873  
0.9225965859745937 0.4418944417385194 0.8495979486418256  
0.8052906348661394 0.4711952444918999 0.7048863047436066  
0.7838009251026195 0.4468449414309263 0.4816870298951976  
0.6243854728828954 0.4373584680277231 0.4883424979495441  
0.5688016068324618 0.4678776657322777 0.7005621292611149  
0.6847599195255930 0.4326597457311422 0.8319103611915424  
0.9260598996231661 0.6716832959468506 0.8241509955526709  
0.7649628815952850 0.6699282865718938 0.4686697248981144  
0.6125818976381813 0.6727028355292192 0.4874407687657336  
0.5648815119772544 0.6268616332562404 0.7009559465272508  
0.6797873651886782 0.6769156683844693 0.8367882883376401  
0.5768765576979366 0.9429036083229558 0.3554595543589393  
0.6963815084203265 0.9748432727713210 0.2150404805483354  
0.7130550732310773 0.9413474028719158 0.9883634053092177  
0.8725573662865629 0.9294191513941635 0.9905037973073954  
0.9336063884110345 0.9660060949525925 0.2022356654714034  
0.8198649918809816 0.9387316603893926 0.3393785470754438  
0.5820500857198299 0.1734007640112868 0.3378329365870391  
0.7006210233783787 0.1319852064437884 0.2031297345824561  
0.7325503125781546 0.1678888307652880 0.9853314418736909  
0.8887156883845817 0.1708304770633434 0.9940493091575174  
0.9367116221870899 0.1252304991383694 0.2087252905472303  
0.8206387656276763 0.1764602323219047 0.3326309178420599  
0.9182996717192851 0.0564188505039154 0.8552798854056133  
0.8065162908854790 0.0376700053708765 0.7048289104384009  
0.7816356692953131 0.0614255774440053 0.4830896244127816  
0.6228548215023698 0.0644107940348753 0.4934289850335133  
0.5689077147548585 0.0299912338528911 0.7048338714139373  
0.6851561347779660 0.0642144584089424 0.8359377902531158  
0.9230664643789485 0.8253857794946868 0.8357055622861516  
0.7641271181303223 0.8287298689955619 0.4821561688944130  
0.6133506529083453 0.8281377079392068 0.4883944439397858  
0.5624840537301717 0.8722976550102287 0.7008559784840345  
0.6646118715056830 0.8297975861046022 0.8526005503762573  
0.4250048196890154 0.4408869023540907 0.6508674939727135  
0.3070067528601126 0.4693998012085523 0.7955281043524258  
0.2833487849705225 0.4403113821154846 0.0180716577166717  
0.1231598723603809 0.4308949385241922 0.0152360797353912  
0.0694517409749525 0.4669959269372207 0.8038888805121043  
0.1827817164571754 0.4355566930146095 0.6677321953839115  
0.4204807891602410 0.6724411302798705 0.6686876138909807  
0.3053773961077036 0.6289365867705036 0.8077055002588167  
0.2739550291571885 0.6693511168619850 0.0272210684849071  
0.1200942911394053 0.6713541003498784 0.0136561443175499  
0.0736232272822794 0.6243433798280883 0.8024907137470196  
0.1856216368138475 0.6696630740482374 0.6709683387550393  
0.0801514721491502 0.5573752465667201 0.1494374682175768

**Structure files (CONTCAR) involved in this work:**

|                    |                    |                    |
|--------------------|--------------------|--------------------|
| 0.1964997040559502 | 0.5304320429553701 | 0.2955891721978773 |
| 0.2219835088822440 | 0.5552052933856184 | 0.5195639104562330 |
| 0.3811183844854808 | 0.5630648367003903 | 0.5131338305593001 |
| 0.4356903937779881 | 0.5279765119146510 | 0.3032206360104948 |
| 0.3211188073234861 | 0.5611640558724050 | 0.1662900476992049 |
| 0.0800270246756806 | 0.3271143676361917 | 0.1735267678327859 |
| 0.1982931668065573 | 0.3713942158941525 | 0.3069548422354815 |
| 0.2342248464891337 | 0.3291205618656572 | 0.5240725456056678 |
| 0.3894385336880575 | 0.3244812227043903 | 0.5164921152237542 |
| 0.4383132105237269 | 0.3699998748177079 | 0.3047765128432333 |
| 0.3211270065418852 | 0.3280839726636013 | 0.1728808706958186 |
| 0.3593298716371801 | 0.0664689191334091 | 0.7259930302862285 |
| 0.3142769632582564 | 0.0526327936708999 | 0.9101566838173248 |
| 0.2009912207293001 | 0.0562706405750188 | 0.0146659225248446 |
| 0.0912285650323281 | 0.0672635828408020 | 0.9062061432048388 |
| 0.1019482455598847 | 0.0615118388605152 | 0.7101212836505199 |
| 0.2290473922154992 | 0.0478875711232330 | 0.7611393804770462 |
| 0.3617628987321380 | 0.8252954872732224 | 0.7539314869468724 |
| 0.3090337632639335 | 0.8578308961374264 | 0.9266926129448801 |
| 0.1926657171585019 | 0.8527298435241213 | 0.0186743260726359 |
| 0.0900891193786158 | 0.8280342803102874 | 0.8983253692758869 |
| 0.1064076500536909 | 0.8392618215069539 | 0.7031020557753429 |
| 0.2310258446060978 | 0.8456585730621110 | 0.7676636530267575 |
| 0.3158703460640253 | 0.9483790900036190 | 0.7817822604186335 |
| 0.0874149142026921 | 0.9488883247255354 | 0.8146591375197797 |
| 0.4341713746335825 | 0.1232763532004330 | 0.5872557393181139 |
| 0.4144543904155606 | 0.9919326735051763 | 0.5793538029025126 |
| 0.3844584111471894 | 0.8614737313711670 | 0.5664356205317921 |
| 0.1938481167779843 | 0.1354531396343235 | 0.6208170395237292 |
| 0.1856620676131318 | 0.0036799124054388 | 0.5848706617844405 |
| 0.2032601849224404 | 0.8709331131714731 | 0.5743138882456152 |
| 0.9858107204487412 | 0.0346820539625238 | 0.7959378450885090 |
| 0.9875879139638595 | 0.8625803387473746 | 0.7843705495367443 |
| 0.1421930418673758 | 0.9286815202822987 | 0.2248879291088445 |
| 0.1823501403413816 | 0.9426482464401655 | 0.4112724404124221 |
| 0.2971707716423099 | 0.9547090200818162 | 0.5092442903704302 |
| 0.4073747789846054 | 0.9305709502721985 | 0.4040446329858324 |
| 0.3956112344283668 | 0.9404250676863762 | 0.2067110015816278 |
| 0.2705674993578017 | 0.9493090238554511 | 0.2657815868300270 |
| 0.1415346165836383 | 0.1717527487762066 | 0.2535930477860427 |
| 0.1973343007378679 | 0.1394157089770477 | 0.4249948050218386 |
| 0.3104679772516986 | 0.1448714050239827 | 0.5264496538715898 |
| 0.4118183204401527 | 0.1689673907529574 | 0.4032046181706186 |
| 0.3981024922709653 | 0.1586622002068858 | 0.2073891548294880 |
| 0.2718402854396033 | 0.1467422184066207 | 0.2619383871909278 |
| 0.1823488124101689 | 0.0478695413252815 | 0.2838010950308675 |
| 0.4169973577284378 | 0.0494086426051722 | 0.3182215652792834 |
| 0.0693932496206300 | 0.8720550784663881 | 0.0833589769356994 |
| 0.0872614514965567 | 0.0042436424079037 | 0.0793596931680706 |
| 0.1018250603052334 | 0.1368947728106104 | 0.0711226207676172 |
| 0.3049597386771984 | 0.8633414690558108 | 0.1233313157395999 |
| 0.3064376265280098 | 0.9945395218634699 | 0.0857067045998469 |
| 0.3061890609693387 | 0.1283589896303958 | 0.0706127392914387 |



**Structure files (CONTCAR) involved in this work:**

|                    |                    |                    |
|--------------------|--------------------|--------------------|
| 0.5119449858904828 | 0.9571988949924911 | 0.2866308080375656 |
| 0.5163041480747292 | 0.1367220635461739 | 0.2910514999735114 |
| 0.6431484617505876 | 0.5685669425121738 | 0.2762860329497655 |
| 0.6797960336402603 | 0.5480698254740912 | 0.0874316346933530 |
| 0.7980113931143460 | 0.5551176996218908 | 0.0008829685435497 |
| 0.9136063691210139 | 0.5771558985250540 | 0.0897059695898785 |
| 0.8938329037449949 | 0.5664777948912851 | 0.2866994599367893 |
| 0.7702454256503923 | 0.5450868149080961 | 0.2307406394668826 |
| 0.6416284943706522 | 0.3232673434293456 | 0.2487342643749282 |
| 0.6963241415772359 | 0.3608818332807317 | 0.0776430380473247 |
| 0.8115508585731964 | 0.3502244504645567 | 0.9810154936362656 |
| 0.9155818435694193 | 0.3338459649702058 | 0.1011716681184799 |
| 0.8974004440525666 | 0.3515975783968389 | 0.2958240734008065 |
| 0.7716058731639269 | 0.3499047907311858 | 0.2386715700830864 |
| 0.6801299913565687 | 0.4480683277166888 | 0.2239707133837310 |
| 0.9187717971035326 | 0.4569180299166817 | 0.1767312376513469 |
| 0.5674654976931967 | 0.6291665193212304 | 0.4100236997953016 |
| 0.5882436545696584 | 0.4990094682800168 | 0.4305012891034914 |
| 0.6101468663985254 | 0.3670601931348352 | 0.4306538614428953 |
| 0.7960259695553347 | 0.6376430388830480 | 0.3675699780827332 |
| 0.8107881700591901 | 0.5084833569832413 | 0.4135457794108234 |
| 0.8020485607677087 | 0.3755032226804840 | 0.4300460572881421 |
| 0.0129184262832526 | 0.5480934678179377 | 0.2152524952719633 |
| 0.0166849805800750 | 0.3693021344952174 | 0.2170366443047528 |
| 0.8608912787308961 | 0.4328053705453937 | 0.7733936477011258 |
| 0.8200960824210590 | 0.4503787114585568 | 0.5892082652718382 |
| 0.7035109574129887 | 0.4530186421626926 | 0.4936778599170477 |
| 0.5929711113877590 | 0.4300669193798048 | 0.5992187609951259 |
| 0.6072665634522186 | 0.4373223499408359 | 0.7968756712690984 |
| 0.7318867798984983 | 0.4409116934255910 | 0.7340191958872812 |
| 0.8819674541470414 | 0.6723099817736935 | 0.7211909662361811 |
| 0.8114167938287349 | 0.6523374574973283 | 0.5640193202153874 |
| 0.6888234857911044 | 0.6433237234855140 | 0.4865228634829922 |
| 0.5832953948560657 | 0.6675273634901943 | 0.5994574675765549 |
| 0.6051682231062555 | 0.6581014122480608 | 0.7944443628496797 |
| 0.7352611504420160 | 0.6736126756218557 | 0.7497511713450608 |
| 0.8076914460692239 | 0.5505862872381208 | 0.7225772104478356 |
| 0.5833828863005407 | 0.5478315916437848 | 0.6880471687541505 |
| 0.9333700354202836 | 0.3720142578447845 | 0.9115172483199857 |
| 0.9103414666263777 | 0.5022357500457955 | 0.9290733971586236 |
| 0.8865997419580033 | 0.6338448127225100 | 0.9138567666675985 |
| 0.6968656805639715 | 0.3590326510605015 | 0.8818102737864062 |
| 0.6996698527525642 | 0.4911741748277816 | 0.9128443337816294 |
| 0.6959712393168974 | 0.6255481223202187 | 0.9287675492939135 |
| 0.4898634056430138 | 0.4538297260209531 | 0.7203780003883994 |
| 0.4846224130227662 | 0.6352043718453320 | 0.7183614345311556 |
| 0.6411132776281060 | 0.9361587878045623 | 0.2819460540409102 |
| 0.6846188759939319 | 0.9627208220396579 | 0.0976454779494508 |
| 0.7921352103621989 | 0.9228616672789606 | 0.9966710742335394 |
| 0.9040686802711624 | 0.9319201596826796 | 0.1022326202026610 |
| 0.8970025896777887 | 0.9315963786179918 | 0.3001895802054436 |
| 0.7699980594454604 | 0.9452343562839899 | 0.2453177183718555 |
| 0.6399334204846447 | 0.1736039645712266 | 0.2530117266035999 |

**Structure files (CONTCAR) involved in this work:**

|                    |                    |                    |
|--------------------|--------------------|--------------------|
| 0.6952899345225222 | 0.1365220209290400 | 0.0828847802829244 |
| 0.8111208801214886 | 0.1463904638579667 | 0.9878955299048429 |
| 0.9145312194189346 | 0.1652622266960354 | 0.1087421719737001 |
| 0.8972247137967279 | 0.1562730295455019 | 0.3042332380817839 |
| 0.7728013285501422 | 0.1626659714040398 | 0.2359193471430414 |
| 0.6946009541434464 | 0.0544862444608773 | 0.2415772379585341 |
| 0.9176588362535530 | 0.0457771433969678 | 0.1999179582488345 |
| 0.5653942139721689 | 0.8731547854416543 | 0.4168275993589681 |
| 0.5851736795216729 | 0.0037378780944158 | 0.4352151754462504 |
| 0.6080554911439019 | 0.1351944366872493 | 0.4376519756141458 |
| 0.8114303939842028 | 0.8645424536061337 | 0.3938106682304435 |
| 0.8125379720943204 | 0.9988943300543985 | 0.4183592105724143 |
| 0.7951800780639515 | 0.1319770283211296 | 0.4265415582095212 |
| 0.0119605947658059 | 0.9495742994974132 | 0.2179733190396064 |
| 0.0167435471595890 | 0.1328365876807188 | 0.2254026420205181 |
| 0.8610246998072865 | 0.0763453011202777 | 0.7751703772596574 |
| 0.8186477866911619 | 0.0629793202622117 | 0.5901373460676139 |
| 0.7022684383720260 | 0.0483526573825527 | 0.4950413288194326 |
| 0.5941407594386040 | 0.0702202516212702 | 0.6060293292758241 |
| 0.6072223366223619 | 0.0574257036082556 | 0.8036047694530217 |
| 0.7310616384595173 | 0.0608334218087630 | 0.7360643332122598 |
| 0.8630860603866574 | 0.8302224068521062 | 0.7539716635245163 |
| 0.7947143428321497 | 0.8478136766673998 | 0.5904098984199173 |
| 0.6889428744741120 | 0.8591197219815823 | 0.4752550651316461 |
| 0.5912602083436336 | 0.8314398641782627 | 0.6045712955269665 |
| 0.5898582534056989 | 0.8392704571493746 | 0.8037957542851530 |
| 0.7185555672920160 | 0.8546122828785430 | 0.7723474140438222 |
| 0.8154109319410950 | 0.9584391002440437 | 0.7169476834704521 |
| 0.5847198256083128 | 0.9505061874518671 | 0.6897629335809446 |
| 0.9341398003170455 | 0.1220388656023051 | 0.9241944314648711 |
| 0.8944458827571707 | 0.9955872883600684 | 0.9283514013922998 |
| 0.9028433516580998 | 0.8619769344392229 | 0.9393946232392317 |
| 0.6958497872671434 | 0.1370975104260908 | 0.8880108211851406 |
| 0.7054153043554222 | 0.0046656392481538 | 0.9131682455439142 |
| 0.6700777635635037 | 0.8765539448341181 | 0.9532099900544158 |
| 0.4896114080095312 | 0.0433948532412355 | 0.7221241294928347 |
| 0.4814463978966615 | 0.8684208168200673 | 0.7021589431442548 |
| 0.3594810167184505 | 0.4328035103868682 | 0.7213325683436248 |
| 0.3184655720942327 | 0.4431646831798288 | 0.9088136018190673 |
| 0.2029501444531228 | 0.4418533889188156 | 0.0071703862170456 |
| 0.0912199273492028 | 0.4273525089540518 | 0.9045351337097142 |
| 0.1061833940929978 | 0.4345577829239207 | 0.7069584407518722 |
| 0.2310425350430185 | 0.4512534689952624 | 0.7627158657271645 |
| 0.3610876802929357 | 0.6734314036367208 | 0.7511671324846189 |
| 0.3101869212207243 | 0.6432520163208915 | 0.9261802214671149 |
| 0.1963944530044329 | 0.6449810073633800 | 0.0271270561841809 |
| 0.1006687752437011 | 0.6680508802874429 | 0.8962598162595610 |
| 0.1076126948636237 | 0.6547285904957220 | 0.7004181151971894 |
| 0.2315049040985163 | 0.6508621673542160 | 0.7672323907523058 |
| 0.3184423381393725 | 0.5500265225306918 | 0.7854792465275094 |
| 0.0925254289313748 | 0.5455245029823841 | 0.8151045746558465 |
| 0.4347390035104298 | 0.3716333875330336 | 0.5882000203303155 |
| 0.4184552698677180 | 0.5029251176960770 | 0.5725299539104722 |

**Structure files (CONTCAR) involved in this work:**

|                    |                    |                    |
|--------------------|--------------------|--------------------|
| 0.3944699681262613 | 0.6342360810708021 | 0.5686060777025344 |
| 0.1998793619718957 | 0.3620992056827028 | 0.6220655594836807 |
| 0.1912055538360855 | 0.4936435545380936 | 0.5835772488205367 |
| 0.2060749579793605 | 0.6267746569500984 | 0.5730182441529611 |
| 0.9898558194941911 | 0.4592072390243123 | 0.7863330844353134 |
| 0.9936487861460043 | 0.6312151417827738 | 0.7953851851425109 |
| 0.1426963977709593 | 0.5685069548592557 | 0.2249626704817471 |
| 0.1867773215200365 | 0.5546789165390260 | 0.4103624880257964 |
| 0.3018990897347424 | 0.5460982141469595 | 0.5092529153639475 |
| 0.4103889255606731 | 0.5693561112272421 | 0.4008085963038878 |
| 0.3974317719543565 | 0.5538002123032165 | 0.2037474514414616 |
| 0.2719296784677824 | 0.5493307586362437 | 0.2614760901730643 |
| 0.1395910926428658 | 0.3274610708774775 | 0.2557117710450221 |
| 0.1963412981765275 | 0.3579931494699795 | 0.4259906731200163 |
| 0.3124104485583521 | 0.3508718347889432 | 0.5185084333375684 |
| 0.4171213963984461 | 0.3270706224319703 | 0.4028649500322540 |
| 0.3977542331951323 | 0.3408690397072204 | 0.2086323251351452 |
| 0.2711442164530727 | 0.3501235524109227 | 0.2634192403745270 |
| 0.1841719854929332 | 0.4501581641720336 | 0.2837258387815722 |
| 0.4201187581410992 | 0.4486771276730345 | 0.3221371996911733 |
| 0.0714983652106235 | 0.6238945356201191 | 0.0797486352716691 |
| 0.0903853336362284 | 0.4924608989267423 | 0.0777952624462420 |
| 0.1065526131271193 | 0.3599831882378112 | 0.0696899512987063 |
| 0.3114841149206894 | 0.6367958038390320 | 0.1228055478290393 |
| 0.3061769758581461 | 0.5063213758678968 | 0.0798679004688305 |
| 0.3065090028230993 | 0.3715656435309046 | 0.0728466869352486 |
| 0.5141491073386074 | 0.5420712691942594 | 0.2824178709633144 |
| 0.5178917651862948 | 0.3620225535063685 | 0.2849719126243794 |
| 0.4377529768945501 | 0.7495304688907883 | 0.6380392291597405 |
| 0.1926947557330123 | 0.7484733054582484 | 0.6402843660219747 |
| 0.2778690167615950 | 0.7500291197908616 | 0.0344273558023211 |
| 0.1121435054708262 | 0.7482997349888850 | 0.0523508234954605 |
| 0.0589897517474029 | 0.2496895237990497 | 0.1517554598120962 |
| 0.3093658662697503 | 0.2495158058683212 | 0.1459057585569128 |
| 0.2262456324422274 | 0.2485411638809564 | 0.5309889636731854 |
| 0.3932451283187178 | 0.2479479762756096 | 0.5579466060086029 |
| 0.5651713990316315 | 0.2504309828946214 | 0.3680393376614642 |
| 0.8169104486214044 | 0.2547931134495833 | 0.3630793554769376 |
| 0.7251718855933409 | 0.2484580436669569 | 0.9827665254186997 |
| 0.8964758783312439 | 0.2476802543123083 | 0.9553923929720074 |
| 0.9420793340054687 | 0.7478401390367697 | 0.8611621871075820 |
| 0.6750369204633456 | 0.7519505690027655 | 0.8857622929000299 |
| 0.7621453439582055 | 0.7507590100852959 | 0.4508700978653932 |
| 0.6105637092163826 | 0.7506748656584482 | 0.4515973277299979 |
| 0.8021959019036947 | 0.6344246771186042 | 0.6930817359690914 |
| 0.7910252141435609 | 0.8760767407202231 | 0.7160698612940151 |
| 0.9931685239834210 | 0.8432495340340102 | 0.5112564088176720 |
| 0.9540434067148090 | 0.7248853152226310 | 0.4211899712992947 |
| 0.0971185340996367 | 0.6986658185065130 | 0.4010272501747775 |
| 0.9163807794784522 | 0.8138726671351926 | 0.4227861517076291 |
| 0.0260669717712653 | 0.7543380545802030 | 0.5235053964883425 |
| 0.9040474266255829 | 0.8179396946626692 | 0.5938000345487607 |
| 0.9202759628306072 | 0.7128906158776508 | 0.5765415520421180 |

**Structure files (CONTCAR) involved in this work:**

0.1425726951779219 0.7162520228065027 0.4399336961441082  
0.0978986235713108 0.6435967123953009 0.3997103222246360  
0.0183493076951096 0.7059378637006717 0.3951488280951000  
0.0994418207395799 0.7183411139612129 0.3242569270399442

**Figure 1(b) La/ZSM-5**

1.0000000000000000

20.0219993591000005 0.0000000000000000 0.0000000000000000

0.0000000000000000 19.8990001678000006 0.0000000000000000

0.0000000000000000 0.0000000000000000 13.3830003737999998

Si Al O La H C

95 1 194 1 6 1

**Direct**

0.4254519941532713 0.0578418464708669 0.6402422588410760

0.3050809546166097 0.0311823653866767 0.7852092278776617

0.2805172942811598 0.0685345938645099 0.0054591294972926

0.1200689130129357 0.0698131435889365 0.0048856791005454

0.0686919424760870 0.0324884571032805 0.7934875965313802

0.1798460614364751 0.0574504029174367 0.6466130327764051

0.4202767497452671 0.8283172416923062 0.6644090181952201

0.3038062257859197 0.8734125795668451 0.8060310670223797

0.2669766013598812 0.8337796099814079 0.0243039376716032

0.1128705412516683 0.8312378248577721 0.0102050578771745

0.0639952047577727 0.8750110117875199 0.7972239666157467

0.1820764413405974 0.8320646186191053 0.6713079642001752

0.0768780939038537 0.9480383014810900 0.1435229192728007

0.1969179817775475 0.9756066914578315 0.2908991022719816

0.2197193945482964 0.9374716295345300 0.5089226169868295

0.3794138921017130 0.9345116976988248 0.5077639580617918

0.4315178500391587 0.9733973217873503 0.2980308729515060

0.3204305862520244 0.9515251393973873 0.1500341269546292

0.0795097590259784 0.1743570484389940 0.1637844876762663

0.1979224592231816 0.1319621950568152 0.3060413082011037

0.2338975732633661 0.1761821705420613 0.5218468829795477

0.3880507394785691 0.1757491270386017 0.5080744054670731

0.4361645017507635 0.1309999238027819 0.2975298602030927

0.3187348823696876 0.1714919053594041 0.1681249287868438

0.5757620544008765 0.5570160648042912 0.3488285263900953

0.6960188958271029 0.5270268568545863 0.2035033915323150

0.7187169513637590 0.5650538693257725 0.9855390208613590

0.8789231585564067 0.5686404512058779 0.9849933826796390

0.9321670222371773 0.5331821277153327 0.1932307774507764

0.8204812015972297 0.5546042992233188 0.3388686390025813

0.5842890508663622 0.3295139462250693 0.3313197043630229

0.6987664008617716 0.3699391974707857 0.1854840897954688

0.7344145011110079 0.3280012750736840 0.9683321074788767

0.8884610632511504 0.3248358566088344 0.9848532816351419

0.8137154252245685 0.3330257041527883 0.3308345432990805

0.9236382576847783 0.4436221892670186 0.8525614187849030

0.8050737258283446 0.4742167685890327 0.7069458940827809

0.7761284149327002 0.4413769439182195 0.4868423574060404

0.6187790246177483 0.4384752044833850 0.4889585585853102

0.5669656966032576 0.4721166207845659 0.7003757567106185

0.6802528192187147 0.4461607414162935 0.8436749413129002

**Structure files (CONTCAR) involved in this work:**

0.9211147910784776 0.6747059533399555 0.8251232311900726  
0.8050167774502741 0.6319578980335525 0.6859431761800304  
0.7653293021543917 0.6708176544078298 0.4675533784577306  
0.6109272667829462 0.6742272087849720 0.4825169247440191  
0.5643060928937290 0.6296935872703728 0.6968922155576588  
0.6833211883191594 0.6725832450194137 0.8238854623931170  
0.5765883696176135 0.9453792885284233 0.3520598262960586  
0.6977246663863880 0.9733665593178205 0.2088104372509172  
0.7206548121445664 0.9362509528967099 0.9877160834322720  
0.8808347219474664 0.9343555876581053 0.9873041285420289  
0.9313945701415601 0.9732111883735635 0.2005539959134056  
0.8223192711394954 0.9463080951481032 0.3488127299514225  
0.5806263819431763 0.1752465599232684 0.3312809959993732  
0.6975169496548578 0.1314840801358757 0.1885675167925890  
0.7338781768543302 0.1713995355640577 0.9700775311011605  
0.8882237106146696 0.1733472271301503 0.9808753024412531  
0.8184682044931975 0.1745164581202005 0.3247350381813707  
0.9238363282750796 0.0555036027186627 0.8481876479290159  
0.8028757795362543 0.0271785722531416 0.7033490166150373  
0.7825383724426969 0.0663478830321667 0.4847578821507730  
0.6228769968923886 0.0678460352239382 0.4859694696718053  
0.5705826600530494 0.0306412994198785 0.6970074381380148  
0.6803633497225184 0.0532750406260452 0.8452199430874908  
0.9215057228965607 0.8292050202273975 0.8319198443998782  
0.8024472353850817 0.8705359934568226 0.6895358332184546  
0.7668084509103197 0.8272750817177150 0.4732928848151145  
0.6122326637931367 0.8276305519504856 0.4851007795248861  
0.5641976169932365 0.8725887496587117 0.6974245841856359  
0.6815488208551226 0.8312761521685567 0.8273826215867358  
0.4226933126757157 0.4462940679163332 0.6498478977224473  
0.0795097590259784 0.1743570484389940 0.1637844876762663  
0.1979224592231816 0.1319621950568152 0.3060413082011037  
0.2338975732633661 0.1761821705420613 0.5218468829795477  
0.3880507394785691 0.1757491270386017 0.5080744054670731  
0.4361645017507635 0.130999238027819 0.2975298602030927  
0.3187348823696876 0.1714919053594041 0.1681249287868438  
0.5757620544008765 0.5570160648042912 0.3488285263900953  
0.6960188958271029 0.5270268568545863 0.2035033915323150  
0.7187169513637590 0.5650538693257725 0.9855390208613590  
0.8789231585564067 0.5686404512058779 0.9849933826796390  
0.9321670222371773 0.5331821277153327 0.1932307774507764  
0.8204812015972297 0.5546042992233188 0.3388686390025813  
0.5842890508663622 0.3295139462250693 0.3313197043630229  
0.6987664008617716 0.3699391974707857 0.1854840897954688  
0.7344145011110079 0.3280012750736840 0.9683321074788767  
0.8884610632511504 0.3248358566088344 0.9848532816351419  
0.8137154252245685 0.3330257041527883 0.3308345432990805  
0.9236382576847783 0.4436221892670186 0.8525614187849030  
0.8050737258283446 0.4742167685890327 0.7069458940827809  
0.7761284149327002 0.4413769439182195 0.4868423574060404  
0.6187790246177483 0.4384752044833850 0.4889585585853102  
0.5669656966032576 0.4721166207845659 0.7003757567106185  
0.6802528192187147 0.4461607414162935 0.8436749413129002

**Structure files (CONTCAR) involved in this work:**

0.9211147910784776 0.6747059533399555 0.8251232311900726  
0.8050167774502741 0.6319578980335525 0.6859431761800304  
0.7653293021543917 0.6708176544078298 0.4675533784577306  
0.6109272667829462 0.6742272087849720 0.4825169247440191  
0.5643060928937290 0.6296935872703728 0.6968922155576588  
0.6833211883191594 0.6725832450194137 0.8238854623931170  
0.5765883696176135 0.9453792885284233 0.3520598262960586  
0.6977246663863880 0.9733665593178205 0.2088104372509172  
0.7206548121445664 0.9362509528967099 0.9877160834322720  
0.8808347219474664 0.9343555876581053 0.9873041285420289  
0.9313945701415601 0.9732111883735635 0.2005539959134056  
0.8223192711394954 0.9463080951481032 0.3488127299514225  
0.5806263819431763 0.1752465599232684 0.3312809959993732  
0.6975169496548578 0.1314840801358757 0.1885675167925890  
0.7338781768543302 0.1713995355640577 0.9700775311011605  
0.8882237106146696 0.1733472271301503 0.9808753024412531  
0.8184682044931975 0.1745164581202005 0.3247350381813707  
0.9238363282750796 0.0555036027186627 0.8481876479290159  
0.8028757795362543 0.0271785722531416 0.7033490166150373  
0.7825383724426969 0.0663478830321667 0.4847578821507730  
0.6228769968923886 0.0678460352239382 0.4859694696718053  
0.5705826600530494 0.0306412994198785 0.6970074381380148  
0.6803633497225184 0.0532750406260452 0.8452199430874908  
0.9215057228965607 0.8292050202273975 0.8319198443998782  
0.8024472353850817 0.8705359934568226 0.6895358332184546  
0.7668084509103197 0.8272750817177150 0.4732928848151145  
0.6122326637931367 0.8276305519504856 0.4851007795248861  
0.5641976169932365 0.8725887496587117 0.6974245841856359  
0.6815488208551226 0.8312761521685567 0.8273826215867358  
0.4226933126757157 0.4462940679163332 0.6498478977224473  
0.3042261787490625 0.4758880224869603 0.7984077222598476  
0.2813963577251558 0.4361101111512201 0.0165043016592257  
0.1198232249830572 0.4354402776949460 0.0143321699115422  
0.0686597072780710 0.4701235754540891 0.8008781393714632  
0.1820998521359889 0.4479839691118302 0.6601674022300500  
0.4210942875069603 0.6734616756644344 0.6656303189564590  
0.3041318909665863 0.6335913642982707 0.8110244844544774  
0.2675261862949375 0.6770433511610490 0.0257945670339033  
0.1134305658396919 0.6771280157017044 0.0099009096332857  
0.0650456484780955 0.6286682541744515 0.7980561249351161  
0.1836170963997195 0.6730124335114375 0.6733389395833927  
0.0780989679216372 0.5622259436245376 0.1458237138848159  
0.1954095062119863 0.5324176073761606 0.2933290238059958  
0.2205109091634313 0.5661516992978300 0.5145000338664980  
0.3809565605956458 0.5663156605358909 0.5077367825767093  
0.4325483409080382 0.5315374932369561 0.2942158106116465  
0.3182662760287779 0.5597929374876643 0.1552994752559986  
0.0784921744311759 0.3291247092753861 0.1757488606740599  
0.1995269742662120 0.3735603501219729 0.3083721819296227  
0.2362876361506862 0.3332541616356721 0.5263743279104220  
0.3909467797105141 0.3291028722284301 0.5159158221771784  
0.4409488567201567 0.3736599395051780 0.3023726237299841  
0.3222952259477671 0.3299500574746830 0.1770108707260498

**Structure files (CONTCAR) involved in this work:**

|                    |                    |                    |
|--------------------|--------------------|--------------------|
| 0.9359021849824539 | 0.1314316606761874 | 0.1966693773212564 |
| 0.9322752645741137 | 0.3723500473645168 | 0.1978957002813405 |
| 0.3606625993410782 | 0.0644058089011359 | 0.7123555020530864 |
| 0.3041937442173551 | 0.0726081063869239 | 0.8897386867363298 |
| 0.2001360723121122 | 0.0592319346513621 | 0.0139702345876803 |
| 0.0975073610017112 | 0.0739748581090961 | 0.8889035527257879 |
| 0.1047994117465344 | 0.0582274111583510 | 0.6920843109007319 |
| 0.2316460288919702 | 0.0359251230374405 | 0.7344551096151457 |
| 0.3578708263737150 | 0.8314962437743126 | 0.7413502323078360 |
| 0.3060829891958251 | 0.8452607960702323 | 0.9194743383086238 |
| 0.1897577084249788 | 0.8584225505596138 | 0.0116804366159222 |
| 0.0842343050952668 | 0.8338419251523693 | 0.8972570427268221 |
| 0.1042763010674409 | 0.8440712082316252 | 0.7020725053982930 |
| 0.2293187312789620 | 0.8627153055258842 | 0.7596156195428904 |
| 0.3232558417112059 | 0.9526751364549129 | 0.8047728566412214 |
| 0.0839827930082751 | 0.9532920173907906 | 0.8121690216872536 |
| 0.4340390911927776 | 0.1265899015413440 | 0.5758076479730174 |
| 0.4190008536203066 | 0.9952126051052789 | 0.5629825964582656 |
| 0.4002974061805483 | 0.8636762745535902 | 0.5590348984188495 |
| 0.1959335188073931 | 0.1324789363599359 | 0.6063000186675300 |
| 0.1831146238400824 | 0.0032576131460617 | 0.5558189440959542 |
| 0.1973386500965790 | 0.8689468220072553 | 0.5655365855035204 |
| 0.9892389533923748 | 0.0448198083394289 | 0.7784888747885147 |
| 0.9841161177250960 | 0.8673272816639745 | 0.7781627090592392 |
| 0.1419311885030228 | 0.9444487912939109 | 0.2153411947434717 |
| 0.1982227882468442 | 0.9307621773604551 | 0.3923341020106419 |
| 0.2998940539433655 | 0.9477955214630003 | 0.5201338063741336 |
| 0.4000524188581464 | 0.9309953777630160 | 0.3907864940878637 |
| 0.3959047849840365 | 0.9514912315695301 | 0.1941123464859336 |
| 0.2701012838529768 | 0.9742782086001013 | 0.2390719011229072 |
| 0.1428587691154468 | 0.1696253926887479 | 0.2383065058957952 |
| 0.1971563594761642 | 0.1681305613924040 | 0.4144201077288815 |
| 0.3108028622816715 | 0.1500072210521384 | 0.5126986381529774 |
| 0.4130986646030383 | 0.1760922051655594 | 0.3927968566125041 |
| 0.3961667885002920 | 0.1565188866109440 | 0.1984894640470286 |
| 0.2713254916339942 | 0.1391039372431488 | 0.2548417202144735 |
| 0.1785511665877596 | 0.0531218833456385 | 0.3179217839649744 |
| 0.4190241935736750 | 0.0527870809727619 | 0.3205306960273724 |
| 0.0681440208317711 | 0.8770583052288886 | 0.0848776501329315 |
| 0.0833818593929004 | 0.0073992746315667 | 0.0605774762301475 |
| 0.0974741079954051 | 0.1396820168080656 | 0.0573609858535690 |
| 0.3026667936006581 | 0.8763038063879028 | 0.1124111106468463 |
| 0.3161514487186821 | 0.0039292473656049 | 0.0571709511309372 |
| 0.3025408505596419 | 0.1379539923272338 | 0.0602091257285214 |
| 0.5105399446330863 | 0.9577020942352329 | 0.2844203479572893 |
| 0.5158567735865850 | 0.1401098855185745 | 0.2791357009584239 |
| 0.6431078721084214 | 0.5588259215168575 | 0.2819494475095651 |
| 0.6931965300561714 | 0.5701521051231004 | 0.1005270186978491 |
| 0.7990333398364096 | 0.5552450651660499 | 0.9805574983090232 |
| 0.9047020067289063 | 0.5775869448321159 | 0.0987603400262147 |
| 0.8958860287835431 | 0.5587769669664747 | 0.2959793779791880 |
| 0.7707714752894500 | 0.5304002936105195 | 0.2498194961957594 |
| 0.6454627222680092 | 0.3287296040007988 | 0.2525002778462941 |

**Structure files (CONTCAR) involved in this work:**

|                    |                    |                    |
|--------------------|--------------------|--------------------|
| 0.6961187878069254 | 0.3394193571424990 | 0.0738234673921203 |
| 0.8113971976748696 | 0.3524146738288331 | 0.9780862593652536 |
| 0.9139560032954723 | 0.3222319797926888 | 0.0978853841065859 |
| 0.8926926480381699 | 0.3504376856652175 | 0.3136745446437437 |
| 0.7733219766155582 | 0.3606200351015915 | 0.2327339226280720 |
| 0.6775992500865660 | 0.4487540411646130 | 0.1828268635452700 |
| 0.9184448872135368 | 0.4554902375759352 | 0.1725158008791696 |
| 0.5670886475663908 | 0.6279318284976466 | 0.4074859787891849 |
| 0.5770101833768012 | 0.4965433691630227 | 0.4308882894860697 |
| 0.6076457344688079 | 0.3668248357378760 | 0.4336539026329322 |
| 0.7989534669052714 | 0.6286208042262498 | 0.3775664179143112 |
| 0.8176957599575839 | 0.5006090182243805 | 0.4307456844041325 |
| 0.7858107532924414 | 0.3697587488288332 | 0.4310667357202903 |
| 0.0116688249623644 | 0.5479625391918943 | 0.2108278778423022 |
| 0.0161428441228469 | 0.3584325293888631 | 0.2415896496980340 |
| 0.8599189957799578 | 0.4372604616978863 | 0.7772265123153365 |
| 0.8053563001373231 | 0.4348812032037725 | 0.6001056131846565 |
| 0.6971764885464764 | 0.4603489632271889 | 0.4889172221883573 |
| 0.5916514320400937 | 0.4305868982864714 | 0.6023831594685567 |
| 0.6049304973594587 | 0.4447893713768046 | 0.7991591082200865 |
| 0.7310129199384033 | 0.4692887917379736 | 0.7550771432278878 |
| 0.8611818981376136 | 0.6754621468367048 | 0.7437488023777968 |
| 0.8051703136951893 | 0.6562400534143792 | 0.5707342171479610 |
| 0.6878946789069164 | 0.6478533771883843 | 0.4819281312743306 |
| 0.5820931468902776 | 0.6703328068566565 | 0.5953649319690051 |
| 0.6060338472646456 | 0.6608147068432504 | 0.7902774489758353 |
| 0.7316892287784382 | 0.6441386254241012 | 0.7353256693974121 |
| 0.8247996327564192 | 0.5527374459683484 | 0.6924064466409738 |
| 0.5836125671184901 | 0.5511435682386575 | 0.6821171480804135 |
| 0.9331331085908577 | 0.3739404125144138 | 0.9134909900123344 |
| 0.9157925734526066 | 0.5059062385703185 | 0.9300449264142374 |
| 0.8967639005529620 | 0.6378574265681457 | 0.9267093617336194 |
| 0.6978415937935487 | 0.3710513092637341 | 0.8813679655627271 |
| 0.6835913496433292 | 0.4996364570014223 | 0.9351544115933358 |
| 0.6976039823152005 | 0.6337791768476341 | 0.9283360813738414 |
| 0.4875221708118387 | 0.4611066930980590 | 0.7190480120616545 |
| 0.4848337628107957 | 0.6376187527419900 | 0.7195314328350916 |
| 0.6413022085309247 | 0.9398480961542790 | 0.2798651153866297 |
| 0.6999189698856039 | 0.9318577978996193 | 0.1045383328241491 |
| 0.8009213690713832 | 0.9448079276055393 | 0.9744796292708974 |
| 0.9015486768235298 | 0.9337388222983810 | 0.1040987428171693 |
| 0.8969343220776209 | 0.9443176877699030 | 0.3015187908842947 |
| 0.7703426961736280 | 0.9685631325375684 | 0.2617205440969989 |
| 0.6422522967309844 | 0.1716612643100419 | 0.2532758541717698 |
| 0.6951083313153550 | 0.1598017525750958 | 0.0752832160444683 |
| 0.8110558810623772 | 0.1468154540716671 | 0.9824895861001642 |
| 0.9179143640999856 | 0.1694013714979311 | 0.0932803392040986 |
| 0.8961076635916682 | 0.1664672337213567 | 0.2894665566923492 |
| 0.7713159322559341 | 0.1438973069764550 | 0.2364141356055839 |
| 0.6798544111662390 | 0.0518189059055120 | 0.1888455351350680 |
| 0.9151211444399168 | 0.0528295378615204 | 0.1883914046712775 |
| 0.5673827098222561 | 0.8755844135480425 | 0.4136829790693546 |
| 0.5835130652089972 | 0.0063461534729273 | 0.4322697941732105 |



**Structure files (CONTCAR) involved in this work:**

|                    |                    |                    |
|--------------------|--------------------|--------------------|
| 0.6001008835593833 | 0.1383561509483556 | 0.4355986454846281 |
| 0.8052489866917403 | 0.8718567605272760 | 0.3902599249917315 |
| 0.8203594959167465 | 0.0008712117086368 | 0.4391722006272504 |
| 0.8063779629328888 | 0.1346594974817990 | 0.4290605692832100 |
| 0.0112081740668865 | 0.9609395844099438 | 0.2115655193804529 |
| 0.0158133330973967 | 0.1382161532409820 | 0.2174834983128630 |
| 0.8580773982426576 | 0.0585013177915168 | 0.7781523627688550 |
| 0.8016054515252339 | 0.0724080818647709 | 0.6022843529568540 |
| 0.7024591270660007 | 0.0562470009201629 | 0.4704305227812368 |
| 0.6037238651008924 | 0.0710154883832903 | 0.6035338299370887 |
| 0.6048811691465128 | 0.0539889740110796 | 0.8011517735018961 |
| 0.7300386127230415 | 0.0288841808175557 | 0.7562341872380424 |
| 0.8574491221905745 | 0.8336653810445720 | 0.7586541825540719 |
| 0.8031415234301623 | 0.8342226943006559 | 0.5812448746072951 |
| 0.6896849755983265 | 0.8529681828836424 | 0.4821453635584847 |
| 0.5854372151914154 | 0.8295719043874757 | 0.5993443086254246 |
| 0.6040668889135310 | 0.8437736273520661 | 0.7945819963929088 |
| 0.7289106429991714 | 0.8629591425311270 | 0.7401340924673055 |
| 0.8210239196732577 | 0.9495660667557799 | 0.6765633070229577 |
| 0.5826697135276526 | 0.9508515562277312 | 0.6783936955247611 |
| 0.9322063439725787 | 0.1259464228379197 | 0.9074871823790293 |
| 0.9191967063722800 | 0.9948620736769577 | 0.9294441365606784 |
| 0.9037684082315403 | 0.8630030948617965 | 0.9393711247171546 |
| 0.6985585095225456 | 0.1285008207408601 | 0.8819406328059762 |
| 0.6843250259566953 | 0.0014732504948509 | 0.9388680833658640 |
| 0.6961903353640863 | 0.8674130104089144 | 0.9338983770263224 |
| 0.4916063834050946 | 0.0473705538268735 | 0.7080561582695323 |
| 0.4842737576162626 | 0.8649808475937752 | 0.7163315764537416 |
| 0.3565858872438559 | 0.4442745965762664 | 0.7193606144871336 |
| 0.3074915011424451 | 0.4334114831739557 | 0.9017458720520828 |
| 0.2005698099879073 | 0.4344372598597045 | 0.0226379711752097 |
| 0.0967260140570485 | 0.4305490980666750 | 0.8986169035659718 |
| 0.1060747207413818 | 0.4424348624246178 | 0.7012251992455590 |
| 0.2292280832973403 | 0.4707193799683136 | 0.7530771489497002 |
| 0.3582918024391703 | 0.6712349460085316 | 0.7414564694400132 |
| 0.3074756210294779 | 0.6665855161319312 | 0.9213955307007462 |
| 0.1907751257045935 | 0.6512694885964520 | 0.0120929495296649 |
| 0.0851758478952182 | 0.6715920397599799 | 0.8967567945364595 |
| 0.1059727297377853 | 0.6580048698245992 | 0.7021508779285416 |
| 0.2298601096228181 | 0.6437094764733123 | 0.7637591371637922 |
| 0.3222006699316906 | 0.5542431329426418 | 0.8185352098575026 |
| 0.0830823227011138 | 0.5500198847906810 | 0.8154621450179689 |
| 0.4318183300911576 | 0.3734506943098989 | 0.5969643213072051 |
| 0.4171968046734186 | 0.5034135668156345 | 0.5631454493839647 |
| 0.4022607119524771 | 0.6361834504894962 | 0.5613876392325634 |
| 0.2042221321580540 | 0.3749031980511999 | 0.6183024883339070 |
| 0.1856329856124471 | 0.5033739562275819 | 0.5715136708099674 |
| 0.2020052143946146 | 0.6367589298950657 | 0.5682224575252798 |
| 0.9896807344697330 | 0.4557688764850446 | 0.7842586036874574 |
| 0.9855427804789492 | 0.6368218296800769 | 0.7764615635869964 |
| 0.1416526287611914 | 0.5682024042824181 | 0.2207059997215411 |
| 0.1911702966892845 | 0.5684219722987925 | 0.4017246744992103 |
| 0.3008006362738361 | 0.5552125451676521 | 0.5145459745987931 |

**Structure files (CONTCAR) involved in this work:**

0.4048452850898985 0.5708435154926023 0.3923981458843364  
0.3948647742329000 0.5579358660620984 0.1944277613920878  
0.2703981671703043 0.5415117748559517 0.2496306735056456  
0.1450140886420857 0.3302007645398124 0.2461583068181813  
0.1946628206983920 0.3494359244782566 0.4243206165738196  
0.3137717393493420 0.3553530662821662 0.5096460047355461  
0.4248349317487018 0.3359069509487260 0.4068539986421112  
0.3996706800220905 0.3375039557764298 0.2123782582980158  
0.2741141751200140 0.3604826236746911 0.2647648060150597  
0.1790374998902970 0.4523922263837267 0.3015105963807907  
0.4186686839801355 0.4517672324695942 0.3098933153531523  
0.0687203346445521 0.6324727783113684 0.0857615865639667  
0.0907655999946507 0.5038440164484735 0.0631986411497951  
0.0895236779820606 0.3714023703638744 0.0737284436872802  
0.3028199301502427 0.6347662577878950 0.1145362398943292  
0.3080747837986749 0.5055558358132350 0.0660944206208719  
0.3111568507632831 0.3707069450228664 0.0734893559098114  
0.5114509372275636 0.5463768374671591 0.2768558119643941  
0.5206318498248697 0.3677329794025444 0.2804654605936170  
0.4385450511463527 0.7508740299959399 0.6397490290578859  
0.1965637670050276 0.7525740138981649 0.6581143152102078  
0.2700970798330477 0.7555403499595765 0.0570204490700591  
0.1092119681707524 0.7541858808516043 0.0483016634580698  
0.0631164547938792 0.2524940127361363 0.1425995394932948  
0.3048868165404263 0.2514893142627003 0.1585298578271937  
0.2313117951874739 0.2544193387910059 0.5547777952418425  
0.3939223441696917 0.2514287302387647 0.5520245646272841  
0.5640054975259093 0.2528401950380645 0.3583382359299749  
0.8016128807025793 0.2529783129760895 0.3441511596180883  
0.7296780839658545 0.2495056755086270 0.9372457639615372  
0.8920681012344271 0.2492145498468979 0.9375883846367897  
0.9406305247664744 0.7514629270577767 0.8525921474538114  
0.6968307428917885 0.7519093049839591 0.8412631341120401  
0.7697076349438400 0.7495773441057643 0.4377275273764710  
0.6062840416092613 0.7512640173542032 0.4437447819484714  
0.0205028564625011 0.4687272182221571 0.4628763853349526  
0.9134438470327426 0.3315514391692710 0.5542689593484280  
0.9932092422465625 0.3695358395714570 0.4314023168022724  
0.0274757494552585 0.5169618839065127 0.4633981011080003  
0.8919310753152242 0.3519015570550169 0.6120942130373770  
0.0704839643433752 0.3065721394179419 0.6146459387620283  
0.9612525292600339 0.3066100388647953 0.5724571829350960  
0.0732917476882119 0.2648550946108199 0.4977462666827427  
0.0233233362937703 0.2325993262664057 0.5931591306043815  
0.0389528484642291 0.2805675280975644 0.5590403584447161

**Figure 1(b) Cu/ZSM-5**

Si O Al Cu C H

1.0000000000000000

20.0219999999999985 0.0000000000000000 0.0000000000000000

0.0000000000000000 19.8990000000000009 0.0000000000000000

0.0000000000000000 0.0000000000000000 13.3829999999999991

94 195 2 3 1 4

Selective dynamics

**Structure files (CONTCAR) involved in this work:**

Direct

|                    |                    |                    |   |   |   |
|--------------------|--------------------|--------------------|---|---|---|
| 0.4215703113503950 | 0.0545690962273506 | 0.6397872959642331 | T | T | T |
| 0.3016288954356063 | 0.0270693091261372 | 0.7845152817928720 | T | T | T |
| 0.2789502840393868 | 0.0651815892416149 | 0.0043701136411149 | T | T | T |
| 0.1189504234775317 | 0.0655483484167682 | 0.0037711300291386 | T | T | T |
| 0.0654541328760021 | 0.0256411774804883 | 0.7920570322185867 | T | T | T |
| 0.1772636573418263 | 0.0512201254185066 | 0.6446655394481180 | T | T | T |
| 0.4200532160614323 | 0.8279282144166816 | 0.6619839204305303 | T | T | T |
| 0.3036447631279683 | 0.8701030678429589 | 0.8048459466996954 | T | T | T |
| 0.2682551785575650 | 0.8289020328658807 | 0.0237649698209634 | T | T | T |
| 0.1137597887176617 | 0.8265588806297749 | 0.0111425537500581 | T | T | T |
| 0.0636357514628860 | 0.8647455228266869 | 0.7950274761703934 | T | T | T |
| 0.1840838881665544 | 0.8282407928051260 | 0.6673503033875724 | T | T | T |
| 0.0759139325212377 | 0.9443295054976744 | 0.1425481102900756 | T | T | T |
| 0.1968357518778120 | 0.9726602795472317 | 0.2866704972650986 | T | T | T |
| 0.2193188895265167 | 0.9339597073060658 | 0.5048630228939136 | T | T | T |
| 0.3785245866940916 | 0.9312556081328036 | 0.5056450563845554 | T | T | T |
| 0.4308246467538860 | 0.9709131302697809 | 0.2962081972405186 | T | T | T |
| 0.3208625998711635 | 0.9485284399460495 | 0.1462815696200369 | T | T | T |
| 0.0796517435708473 | 0.1713078700493375 | 0.1592479704283927 | T | T | T |
| 0.1968406313875529 | 0.1295647115711663 | 0.3035787317279027 | T | T | T |
| 0.2296837093139869 | 0.1720122602158716 | 0.5210868579140541 | T | T | T |
| 0.3846443738293341 | 0.1727377221279617 | 0.5064539599225258 | T | T | T |
| 0.4343022292548316 | 0.1279305711944984 | 0.2965951390799569 | T | T | T |
| 0.3178790973732130 | 0.1693160556612949 | 0.1669748088409657 | T | T | T |
| 0.5748457321496585 | 0.5558577429746957 | 0.3599634938654732 | T | T | T |
| 0.6951339770482345 | 0.5270409519226008 | 0.2232751653203190 | T | T | T |
| 0.7144179840119441 | 0.5513305722268040 | 0.9944202607217065 | T | T | T |
| 0.8732499963890091 | 0.5673222367019100 | 0.9918591559893919 | T | T | T |
| 0.9326220876783012 | 0.5308457156997117 | 0.2021037978032887 | T | T | T |
| 0.8215934094447541 | 0.5608368578675947 | 0.3473431799861931 | T | T | T |
| 0.5814342406949343 | 0.3250682025574973 | 0.3317552074760358 | T | T | T |
| 0.7000297076454742 | 0.3696247577635736 | 0.2047337954097370 | T | T | T |
| 0.7332528668923001 | 0.3318739422630179 | 0.9863645775694713 | T | T | T |
| 0.8880725359488826 | 0.3318927616013622 | 0.9985151886149950 | T | T | T |
| 0.9367118454585850 | 0.3724809061181678 | 0.2094277266913162 | T | T | T |
| 0.8214844451641889 | 0.3282790616964212 | 0.3397580004205897 | T | T | T |
| 0.9250040729334286 | 0.4458569296418947 | 0.8592398064769537 | T | T | T |
| 0.8080130196726584 | 0.4672679843071737 | 0.7157129213010051 | T | T | T |
| 0.7814296735531351 | 0.4401215074500274 | 0.4922619462487758 | T | T | T |
| 0.6218698187043845 | 0.4311826792852460 | 0.4908350163930111 | T | T | T |
| 0.5665611487752534 | 0.4644942038729731 | 0.7001741808255313 | T | T | T |
| 0.6792957380435157 | 0.4358035020886503 | 0.8411499145861941 | T | T | T |
| 0.7979528626048482 | 0.6234309873889641 | 0.7035503629412220 | T | T | T |
| 0.7648601754236166 | 0.6696856201649021 | 0.4828808587776820 | T | T | T |
| 0.6094221083090147 | 0.6742630652322469 | 0.4898412362884410 | T | T | T |
| 0.5683918560182373 | 0.6227431157933658 | 0.7025350789326010 | T | T | T |
| 0.6771893430712809 | 0.6663449797131397 | 0.8448791957575538 | T | T | T |
| 0.5774741771808768 | 0.9420758645456285 | 0.3441894327274660 | T | T | T |
| 0.6959485050651432 | 0.9738389338986877 | 0.2035087121066101 | T | T | T |
| 0.7182985746053089 | 0.9528388239447244 | 0.9756909116594616 | T | T | T |
| 0.8785972417206425 | 0.9497529322206442 | 0.9815473851999831 | T | T | T |
| 0.9315357264885771 | 0.9686632293549855 | 0.1968912773931583 | T | T | T |

**Structure files (CONTCAR) involved in this work:**

|                    |                    |                    |   |   |   |
|--------------------|--------------------|--------------------|---|---|---|
| 0.8165326506253203 | 0.9309295569428984 | 0.3288953599769202 | T | T | T |
| 0.5799114077161768 | 0.1723739747983078 | 0.3238434206861524 | T | T | T |
| 0.7001277277903143 | 0.1310110089078332 | 0.1945952922494383 | T | T | T |
| 0.7355554370209397 | 0.1703789897329708 | 0.9774510734528939 | T | T | T |
| 0.8916373308300999 | 0.1782801614669203 | 0.9785950782980042 | T | T | T |
| 0.9375450735323717 | 0.1269077068951097 | 0.1944740026355990 | T | T | T |
| 0.8223110660082404 | 0.1737663304533971 | 0.3268284781594106 | T | T | T |
| 0.9230867183352858 | 0.0680390988904505 | 0.8433414734580084 | T | T | T |
| 0.8054403075969758 | 0.0340949081586396 | 0.6990401024339984 | T | T | T |
| 0.7831195454387586 | 0.0551080442208449 | 0.4749863236114827 | T | T | T |
| 0.6232336965093956 | 0.0656790922083149 | 0.4814177134575717 | T | T | T |
| 0.5657366257252527 | 0.0360766503109661 | 0.6946468721998159 | T | T | T |
| 0.6814156303717388 | 0.0705354488819944 | 0.8231876155217931 | T | T | T |
| 0.9145585624614566 | 0.8324702744914643 | 0.8270310988796190 | T | T | T |
| 0.7980456553888704 | 0.8756181618454767 | 0.6919281865713541 | T | T | T |
| 0.7682997709225531 | 0.8278714561116034 | 0.4780566568182855 | T | T | T |
| 0.6084795850341359 | 0.8266786383033341 | 0.4866909349599982 | T | T | T |
| 0.5620213056946662 | 0.8776561965296443 | 0.7028076778416088 | T | T | T |
| 0.4221106729314437 | 0.4430794249248562 | 0.6468048715112094 | T | T | T |
| 0.3025195976874488 | 0.4726754953854879 | 0.7910356911487366 | T | T | T |
| 0.2813663979546272 | 0.4354395046247553 | 0.0116637466018326 | T | T | T |
| 0.1218006834833597 | 0.4335351121474384 | 0.0117711509036849 | T | T | T |
| 0.0707000601454155 | 0.4714386711657982 | 0.8006826872363544 | T | T | T |
| 0.1789861959345246 | 0.4474845021916022 | 0.6505979789720554 | T | T | T |
| 0.4233387405512636 | 0.6726093757084584 | 0.6653690704664290 | T | T | T |
| 0.3064257173189544 | 0.6292631296278045 | 0.8079038232862674 | T | T | T |
| 0.2691892108010157 | 0.6722064945088251 | 0.0269884750124745 | T | T | T |
| 0.1153981587028967 | 0.6736214505718728 | 0.0131401379461517 | T | T | T |
| 0.0675679047052477 | 0.6304875132220884 | 0.7992341873981467 | T | T | T |
| 0.1856969424185761 | 0.6699714474255396 | 0.6676630562631906 | T | T | T |
| 0.0770797126872858 | 0.5569128970583848 | 0.1440299499317935 | T | T | T |
| 0.1976297186888973 | 0.5269204373565287 | 0.2865200053617004 | T | T | T |
| 0.2196489967689544 | 0.5636738779832020 | 0.5080464180245521 | T | T | T |
| 0.3790041822186824 | 0.5659012354052543 | 0.5110507554933001 | T | T | T |
| 0.4314334246987906 | 0.5288406142828386 | 0.2999339527583275 | T | T | T |
| 0.3230527838510909 | 0.5537975059324328 | 0.1491507263298554 | T | T | T |
| 0.0795951535703820 | 0.3262545040065215 | 0.1666716974447142 | T | T | T |
| 0.1974718451285195 | 0.3692815944740127 | 0.3059355181574013 | T | T | T |
| 0.2319408759023331 | 0.3285123120677757 | 0.5250109224452852 | T | T | T |
| 0.3869724257522085 | 0.3254983757506282 | 0.5126416221332780 | T | T | T |
| 0.4374618740054753 | 0.3709914779344320 | 0.3012935714203061 | T | T | T |
| 0.3201877763047964 | 0.3286112649719377 | 0.1717634720146964 | T | T | T |
| 0.3552756034326769 | 0.0603394117896507 | 0.7087410801110783 | T | T | T |
| 0.2999275015718764 | 0.0706548866418455 | 0.8873867816112193 | T | T | T |
| 0.1988229639795187 | 0.0542304505140911 | 0.0160855663650475 | T | T | T |
| 0.0980015354061805 | 0.0649488006643110 | 0.8869434027564288 | T | T | T |
| 0.1022502734542643 | 0.0494794086649075 | 0.6901581918255584 | T | T | T |
| 0.2282539589066876 | 0.0287191017063216 | 0.7330648454531757 | T | T | T |
| 0.3578240657148292 | 0.8290852633002479 | 0.7395531629730007 | T | T | T |
| 0.3048871013275828 | 0.8395059175053345 | 0.9169204922650219 | T | T | T |
| 0.1906863148697532 | 0.8529903811031926 | 0.0149200001390710 | T | T | T |
| 0.0880989082846611 | 0.8277181549221961 | 0.8965350222559557 | T | T | T |
| 0.1064207948386094 | 0.8385600159115750 | 0.6994875062673466 | T | T | T |

**Structure files (CONTCAR) involved in this work:**

|                    |                    |                    |   |   |   |
|--------------------|--------------------|--------------------|---|---|---|
| 0.2297800130756835 | 0.8607802667989566 | 0.7557745334766965 | T | T | T |
| 0.3219612192650724 | 0.9496361848932643 | 0.8082855335328739 | T | T | T |
| 0.0727365128868867 | 0.9451901581978951 | 0.8092488166766540 | T | T | T |
| 0.4295775644513931 | 0.1227948445174721 | 0.5740954534194258 | T | T | T |
| 0.4184672609658874 | 0.9907314300974682 | 0.5637543059582465 | T | T | T |
| 0.3965216828765372 | 0.8589277680687979 | 0.5548537470337438 | T | T | T |
| 0.1931936722428644 | 0.1268220201541464 | 0.6057756711389785 | T | T | T |
| 0.1810122785061830 | 0.9986259401041060 | 0.5519804578139839 | T | T | T |
| 0.1979123860931735 | 0.8649564734176538 | 0.5609473857968202 | T | T | T |
| 0.9873032159284310 | 0.0449156776030104 | 0.7786679828988292 | T | T | T |
| 0.9866195915666757 | 0.8437443257052720 | 0.7739797790804275 | T | T | T |
| 0.1418714656487630 | 0.9403481632394406 | 0.2121252617109393 | T | T | T |
| 0.1985062947831216 | 0.9276965901940859 | 0.3879383085156990 | T | T | T |
| 0.2991384735255159 | 0.9462748782371515 | 0.5164986939278424 | T | T | T |
| 0.4002657671211113 | 0.9281225159740263 | 0.3890321812442920 | T | T | T |
| 0.3959198247492527 | 0.9491883739606621 | 0.1916878333354204 | T | T | T |
| 0.2696915698030308 | 0.9717492959421100 | 0.2339273448829668 | T | T | T |
| 0.1438340454454763 | 0.1674912044687935 | 0.2322219571553155 | T | T | T |
| 0.1928522465314068 | 0.1634273354667538 | 0.4135753944864092 | T | T | T |
| 0.3071199837786884 | 0.1478638590915310 | 0.5098647083674929 | T | T | T |
| 0.4109525877712799 | 0.1729689430740712 | 0.3916781676792652 | T | T | T |
| 0.3953544706953713 | 0.1538061956299890 | 0.1967333209170628 | T | T | T |
| 0.2712187948774504 | 0.1389193447164240 | 0.2562270537983529 | T | T | T |
| 0.1780136377936809 | 0.0502863003991971 | 0.3122047694424098 | T | T | T |
| 0.4169107866725654 | 0.0498801627608071 | 0.3196368707614418 | T | T | T |
| 0.0675490370637764 | 0.8741614806482242 | 0.0814118466612994 | T | T | T |
| 0.0803547472682075 | 0.0056062246857932 | 0.0625250868211844 | T | T | T |
| 0.0970231931238257 | 0.1374500016760262 | 0.0515260724597252 | T | T | T |
| 0.3048349348393408 | 0.8727307766884230 | 0.1095150058672024 | T | T | T |
| 0.3167327090531458 | 0.0005368377476859 | 0.0527220779498504 | T | T | T |
| 0.3004891806298434 | 0.1342893258082739 | 0.0604210151787520 | T | T | T |
| 0.5097803565072840 | 0.9563465813289551 | 0.2815192817697535 | T | T | T |
| 0.5141458532325743 | 0.1355689926486386 | 0.2781804483182626 | T | T | T |
| 0.6400483454501695 | 0.5667145521057464 | 0.2889879237834029 | T | T | T |
| 0.6852299684311250 | 0.5482968807311325 | 0.1068189096490341 | T | T | T |
| 0.7946763973260936 | 0.5457734731659875 | 0.9898213620710743 | T | T | T |
| 0.9023890645048817 | 0.5688328406238580 | 0.1043049812140125 | T | T | T |
| 0.8967678055218297 | 0.5593169088702872 | 0.3023485476330605 | T | T | T |
| 0.7701653986117262 | 0.5485005824391684 | 0.2546660993516562 | T | T | T |
| 0.6419289831551351 | 0.3229565934681046 | 0.2511598610777502 | T | T | T |
| 0.6969276443497425 | 0.3630427485981966 | 0.0844231168617672 | T | T | T |
| 0.8107428869961520 | 0.3563585084813414 | 0.9890940859299430 | T | T | T |
| 0.9106460456304633 | 0.3288012216732252 | 0.1146731413252541 | T | T | T |
| 0.8982917098073544 | 0.3462786370838866 | 0.3092467828242198 | T | T | T |
| 0.7733374994058948 | 0.3469991247890688 | 0.2448629335237006 | T | T | T |
| 0.6846840774952450 | 0.4468807964811582 | 0.2376370426531401 | T | T | T |
| 0.9185737010068863 | 0.4509500517674237 | 0.1896091129301090 | T | T | T |
| 0.5623898001162577 | 0.6219065329879543 | 0.4288137834454577 | T | T | T |
| 0.5838920907142607 | 0.4914963162647930 | 0.4327709558339626 | T | T | T |
| 0.6079832494366071 | 0.3608136073345626 | 0.4334395396149315 | T | T | T |
| 0.8087216410392750 | 0.6345027185764243 | 0.3949648530986792 | T | T | T |
| 0.8127725868919901 | 0.5029994755270116 | 0.4311523690454692 | T | T | T |
| 0.7998008098139379 | 0.3699643545616632 | 0.4380537940634493 | T | T | T |

**Structure files (CONTCAR) involved in this work:**

|                    |                    |                    |   |   |   |
|--------------------|--------------------|--------------------|---|---|---|
| 0.0116678425538771 | 0.5462188413793930 | 0.2139748010839751 | T | T | T |
| 0.0168765904148911 | 0.3629856057261838 | 0.2225425723194115 | T | T | T |
| 0.8615527818468246 | 0.4290827048043056 | 0.7873132396624188 | T | T | T |
| 0.8141758693067921 | 0.4386302066247359 | 0.6028296052325927 | T | T | T |
| 0.7008833214054746 | 0.4485923951519366 | 0.4969292040772624 | T | T | T |
| 0.5914833643685528 | 0.4235657228604834 | 0.6021942957196198 | T | T | T |
| 0.6040471854299102 | 0.4338049474992223 | 0.7975977521503403 | T | T | T |
| 0.7318776783010313 | 0.4535160341169869 | 0.7530593508681004 | T | T | T |
| 0.8536679687887139 | 0.6756711158179245 | 0.7373496698299826 | T | T | T |
| 0.7795589883161216 | 0.6316271579930512 | 0.5866940423641858 | T | T | T |
| 0.6862890245872169 | 0.6596601399673742 | 0.4576041749753849 | T | T | T |
| 0.6004031395171394 | 0.6650041705148930 | 0.6101220211616663 | T | T | T |
| 0.6019459038700153 | 0.6481891468603994 | 0.8074696323534791 | T | T | T |
| 0.7293025322800012 | 0.6313644288355400 | 0.7691080189192721 | T | T | T |
| 0.8246535080024934 | 0.5468250747798420 | 0.7212780836575139 | T | T | T |
| 0.5849443148599706 | 0.5435602820410350 | 0.6862004558234411 | T | T | T |
| 0.9351533665776517 | 0.3839709946202551 | 0.9373885698396229 | T | T | T |
| 0.9141068954475914 | 0.5145927648700981 | 0.9232020143625230 | T | T | T |
| 0.8848622092868658 | 0.6413687581064329 | 0.9403174920327753 | T | T | T |
| 0.6966421998089943 | 0.3630462923810141 | 0.8887697540684951 | T | T | T |
| 0.6807523835186532 | 0.4946824167895005 | 0.9261251042117872 | T | T | T |
| 0.6897214538444428 | 0.6279054353618329 | 0.9576201530664782 | T | T | T |
| 0.4870918250595349 | 0.4542199258822190 | 0.7174352832059278 | T | T | T |
| 0.4883353963548845 | 0.6335633257227480 | 0.7097893926041552 | T | T | T |
| 0.6386427821259544 | 0.9342972154823174 | 0.2653061521925641 | T | T | T |
| 0.6840358187982412 | 0.9634081123149492 | 0.0847942834035016 | T | T | T |
| 0.7985422522513341 | 0.9608600441233697 | 0.9836156439290866 | T | T | T |
| 0.9066686546409000 | 0.9349543024260052 | 0.0928574133063911 | T | T | T |
| 0.8934689267573415 | 0.9334973615107024 | 0.2904575111288850 | T | T | T |
| 0.7687074965624575 | 0.9429343031516035 | 0.2316647258379086 | T | T | T |
| 0.6370259255148064 | 0.1730561210040820 | 0.2373727395397771 | T | T | T |
| 0.7005781001887500 | 0.1349692382532901 | 0.0736716562471068 | T | T | T |
| 0.8145718964868914 | 0.1518109097501759 | 0.9748912334495747 | T | T | T |
| 0.9209330825091755 | 0.1630960327637551 | 0.0889141851572954 | T | T | T |
| 0.8980250226606885 | 0.1645622524835563 | 0.2847108870552184 | T | T | T |
| 0.7701497280132964 | 0.1623173443638832 | 0.2347843188807396 | T | T | T |
| 0.6930923407889540 | 0.0534187777329290 | 0.2318033973817043 | T | T | T |
| 0.9146694487654612 | 0.0486613735049662 | 0.1937274001007093 | T | T | T |
| 0.5682549197584803 | 0.8735419115349459 | 0.4077631797458551 | T | T | T |
| 0.5908774289755659 | 0.0033490192803700 | 0.4209772676217957 | T | T | T |
| 0.6079132180272238 | 0.1353275525272675 | 0.4229947535844455 | T | T | T |
| 0.8018083849543072 | 0.8572356472664220 | 0.3760344290017973 | T | T | T |
| 0.8035694383627119 | 0.9891949924727633 | 0.4109798644352551 | T | T | T |
| 0.8072684052069452 | 0.1226669742472909 | 0.4178306577586769 | T | T | T |
| 0.0108458083240106 | 0.9552922600689636 | 0.2130101514406643 | T | T | T |
| 0.0176077814576782 | 0.1326210687361712 | 0.2136418569204557 | T | T | T |
| 0.8591965511293160 | 0.0722678185892009 | 0.7696378081141835 | T | T | T |
| 0.8199665482591564 | 0.0526517202813812 | 0.5829591168412768 | T | T | T |
| 0.7030620402940886 | 0.0553581059430305 | 0.4913415640652926 | T | T | T |
| 0.5887088007293697 | 0.0705768694234579 | 0.5901153812361570 | T | T | T |
| 0.6047200345915333 | 0.0739215819772708 | 0.7852957248631139 | T | T | T |
| 0.7306398343829295 | 0.0599889238547687 | 0.7278227638344941 | T | T | T |
| 0.8591703646587338 | 0.8324062244803314 | 0.7401639989573349 | T | T | T |

**Structure files (CONTCAR) involved in this work:**

|                    |                    |                    |   |   |   |
|--------------------|--------------------|--------------------|---|---|---|
| 0.8016976473287365 | 0.8676187424826044 | 0.5709295347649553 | T | T | T |
| 0.6881887843031161 | 0.8399190766276703 | 0.4743488548670928 | T | T | T |
| 0.5859548354327656 | 0.8407930589034633 | 0.6000271260350598 | T | T | T |
| 0.5945512124047939 | 0.8436093221475233 | 0.7995457269145085 | T | T | T |
| 0.7278345470993913 | 0.8506246295124312 | 0.7337068758210438 | T | T | T |
| 0.8124654784459679 | 0.9542760306342529 | 0.7196538833386348 | T | T | T |
| 0.5832239135742868 | 0.9567255624864949 | 0.6934697973397376 | T | T | T |
| 0.9356877248677187 | 0.1418059893637788 | 0.8922476904192528 | T | T | T |
| 0.9121165207799622 | 0.0181404897784790 | 0.9383959996943897 | T | T | T |
| 0.9021921805651081 | 0.8890889015703872 | 0.9104559508872396 | T | T | T |
| 0.6991823605070958 | 0.1410643638119883 | 0.8785748833682603 | T | T | T |
| 0.6884713211981196 | 0.0069076583484073 | 0.8986296452134910 | T | T | T |
| 0.6994803605319421 | 0.8757800656210234 | 0.9416052989375557 | T | T | T |
| 0.4861936156998847 | 0.0476368429891905 | 0.7119716703842754 | T | T | T |
| 0.4804985394246520 | 0.8719334751813810 | 0.7086599347196489 | T | T | T |
| 0.3564427817854248 | 0.4380667958179815 | 0.7169078764506448 | T | T | T |
| 0.2992405056169591 | 0.4292934021659734 | 0.8937818662874689 | T | T | T |
| 0.2013595614682014 | 0.4446239835017027 | 0.0289140856063018 | T | T | T |
| 0.1040165002045194 | 0.4307150661976698 | 0.8939103805266471 | T | T | T |
| 0.1040620324893418 | 0.4460080053585866 | 0.6967891577168994 | T | T | T |
| 0.2297042515987722 | 0.4725359434364920 | 0.7379665217122287 | T | T | T |
| 0.3641904466382007 | 0.6688126004377057 | 0.7474683487575255 | T | T | T |
| 0.3038696682106642 | 0.6609549083718895 | 0.9190113553349666 | T | T | T |
| 0.1919304989854234 | 0.6467546943334070 | 0.0235575045718064 | T | T | T |
| 0.0939342659193493 | 0.6715513083647161 | 0.8970785733074789 | T | T | T |
| 0.1090879436432117 | 0.6573061534429382 | 0.7021276130015160 | T | T | T |
| 0.2348477579756648 | 0.6384757205611845 | 0.7526512326939211 | T | T | T |
| 0.3245294956208142 | 0.5496986930237090 | 0.8145268189222272 | T | T | T |
| 0.0836390872392111 | 0.5510472851832143 | 0.8176442223949766 | T | T | T |
| 0.4308312383568506 | 0.3727586697543340 | 0.5863942898708343 | T | T | T |
| 0.4180443528099189 | 0.5048275839332446 | 0.5670430758601228 | T | T | T |
| 0.3991301149649693 | 0.6373078454190232 | 0.5616794942328597 | T | T | T |
| 0.1976043769982014 | 0.3722829939332358 | 0.6130847741553166 | T | T | T |
| 0.1810065681761916 | 0.4997740716561715 | 0.5572616482693572 | T | T | T |
| 0.1983095241351397 | 0.6339078888857387 | 0.5603421977077003 | T | T | T |
| 0.9914810296820546 | 0.4545494591224593 | 0.7920565180235416 | T | T | T |
| 0.9897234959178681 | 0.6438850195251665 | 0.7829105737008386 | T | T | T |
| 0.1426522368827585 | 0.5618645514096376 | 0.2143354303859377 | T | T | T |
| 0.1991619970139530 | 0.5678500643108836 | 0.3911002730553351 | T | T | T |
| 0.2995101090415082 | 0.5519856469741149 | 0.5218542015755604 | T | T | T |
| 0.4000418722536997 | 0.5694067280215608 | 0.3942583241002020 | T | T | T |
| 0.3977072286561472 | 0.5532094638342246 | 0.1960568669152513 | T | T | T |
| 0.2710297641082209 | 0.5306721119436527 | 0.2357297416867269 | T | T | T |
| 0.1434133215757217 | 0.3274823953523726 | 0.2409374754724143 | T | T | T |
| 0.1940989371971418 | 0.3416727026122440 | 0.4195341600942787 | T | T | T |
| 0.3097426283339951 | 0.3511684407818806 | 0.5131437521939041 | T | T | T |
| 0.4165673556546893 | 0.3290905187935306 | 0.4002633335740177 | T | T | T |
| 0.3976839026832285 | 0.3406922292456870 | 0.2050872429055884 | T | T | T |
| 0.2719784726346331 | 0.3578756671432237 | 0.2600144084780650 | T | T | T |
| 0.1781099776440827 | 0.4485739576485437 | 0.3042207953958109 | T | T | T |
| 0.4179927521072763 | 0.4492666867381431 | 0.3177742287818442 | T | T | T |
| 0.0674372369315400 | 0.6265623952399656 | 0.0820005120494936 | T | T | T |
| 0.0819178083625945 | 0.4951745709370617 | 0.0647916098650263 | T | T | T |

**Structure files (CONTCAR) involved in this work:**

|                    |                    |                    |   |   |   |
|--------------------|--------------------|--------------------|---|---|---|
| 0.0979018628289562 | 0.3632816228379266 | 0.0619979572780130 | T | T | T |
| 0.3083290897525227 | 0.6297193386814010 | 0.1118292772825564 | T | T | T |
| 0.3192913076386555 | 0.5014085127060453 | 0.0559885834736636 | T | T | T |
| 0.3061947462264816 | 0.3671526630937871 | 0.0668137269513544 | T | T | T |
| 0.5106987528526953 | 0.5443164442364401 | 0.2884598253910303 | T | T | T |
| 0.5176892989287298 | 0.3644048735883574 | 0.2835195216228587 | T | T | T |
| 0.4421010588478500 | 0.7503183753308770 | 0.6430140033418821 | T | T | T |
| 0.2011868273896585 | 0.7493402757071265 | 0.6537520294937458 | T | T | T |
| 0.2729110060593962 | 0.7508592967106975 | 0.0573101416614327 | T | T | T |
| 0.1085540919783779 | 0.7502916634066945 | 0.0536354857470901 | T | T | T |
| 0.0601673142089348 | 0.2493022958442165 | 0.1401913092315517 | T | T | T |
| 0.3057185099650421 | 0.2493961128590227 | 0.1549145507660383 | T | T | T |
| 0.2257693139639111 | 0.2499761805929676 | 0.5560508233658534 | T | T | T |
| 0.3912957401895292 | 0.2483377111097740 | 0.5512677105447716 | T | T | T |
| 0.5606180737555291 | 0.2483811175945808 | 0.3567476593646535 | T | T | T |
| 0.8140388061126956 | 0.2497236613351530 | 0.3688309293921513 | T | T | T |
| 0.7261501129913618 | 0.2511369966928957 | 0.9833321085222057 | T | T | T |
| 0.8956028348061951 | 0.2574751777553643 | 0.9522578893108996 | T | T | T |
| 0.9138869078886157 | 0.7581304514973273 | 0.8828866849949596 | T | T | T |
| 0.6885926774348977 | 0.7439416412234029 | 0.8692890976115151 | T | T | T |
| 0.7854401320936187 | 0.7482368422209675 | 0.4859524686151190 | T | T | T |
| 0.5889650777338242 | 0.7497335841889052 | 0.4580630991548089 | T | T | T |
| 0.7992522994031619 | 0.6860225289837104 | 0.0863620934510675 | T | T | T |
| 0.6965087036409915 | 0.7630609332143513 | 0.1485157985691357 | T | T | T |
| 0.8133397875663186 | 0.8074994473257602 | 0.0159470020186140 | T | T | T |
| 0.9163859078767838 | 0.6761725774050130 | 0.8245700664510882 | T | T | T |
| 0.6766627078646372 | 0.8279217996022858 | 0.8314353657745569 | T | T | T |
| 0.7041393028416679 | 0.6905457765633708 | 0.0705909285240311 | T | T | T |
| 0.7259457107961939 | 0.8160697239830734 | 0.0513278524041375 | T | T | T |
| 0.8491591799609041 | 0.7275164083667182 | 0.9870997472003349 | T | T | T |
| 0.8727135951915758 | 0.7355061769285697 | 0.2233275137172630 | T | T | T |
| 0.8286733930833251 | 0.7075630751243148 | 0.1590436361017156 | T | T | T |
| 0.8744318455727068 | 0.7878146400724261 | 0.1987253088947752 | T | T | T |
| 0.8457960922720086 | 0.7256478167720811 | 0.2928132924045062 | T | T | T |
| 0.9190718977259237 | 0.7069445400773456 | 0.2138406650935762 | T | T | T |

**Figure S6(a) IS as same as Figure S2 Zn/ZSM-5****Figure S6(a) TS**

1.0000000000000000

20.0219993591000005 0.0000000000000000 0.0000000000000000

0.0000000000000000 19.8990001678000006 0.0000000000000000

0.0000000000000000 0.0000000000000000 13.3830003737999998

Si O Al Zn C H

94 193 2 2 1 4

## Direct

0.4225501123524456 0.0599165354770691 0.6487164025125568

0.3045902298180718 0.0319330375009994 0.7912812517311634

0.2821855003833723 0.0564048078393069 0.0171540321347230

0.1222744071484424 0.0651111975919456 0.0130796844788433

0.0676452736444824 0.0322368890417532 0.8012397603015055

0.1799768658747939 0.0653477339839530 0.6640496903011389

0.4185521862900739 0.8275660062122404 0.6687357173949088

0.3006571970324857 0.8732440930665611 0.7999478531549719

0.2671780161073094 0.8306180925327087 0.0187305380616644



**Structure files (CONTCAR) involved in this work:**

|                    |                    |                    |
|--------------------|--------------------|--------------------|
| 0.1112553897150814 | 0.8268153366370222 | 0.0117273900185757 |
| 0.0655964199667885 | 0.8749344258208335 | 0.7981769953658319 |
| 0.1786593163325702 | 0.8290670492937640 | 0.6640776245485075 |
| 0.0760728303845230 | 0.9418279049634549 | 0.1482805608733688 |
| 0.1950473843230336 | 0.9699908162304978 | 0.2899028807517955 |
| 0.2164037693259250 | 0.9439117807753472 | 0.5158107236905073 |
| 0.3766353613348968 | 0.9357037328916491 | 0.5136650871046536 |
| 0.4330576674041957 | 0.9682103916074867 | 0.3012913623230753 |
| 0.3199832442607721 | 0.9349332608415772 | 0.1640450023975578 |
| 0.0815069194936345 | 0.1739103128069393 | 0.1679752668191930 |
| 0.1990816601734278 | 0.1286723991583022 | 0.3001982860893681 |
| 0.2318908216358040 | 0.1701744748621767 | 0.5179917311738023 |
| 0.3881117904820485 | 0.1740781605330405 | 0.5093323546334391 |
| 0.4357244386401011 | 0.1266452124905376 | 0.2957102221138399 |
| 0.3201208307782426 | 0.1722346858407915 | 0.1655176663790274 |
| 0.5755114956132326 | 0.5554208145186442 | 0.3581708022934211 |
| 0.6886427341209135 | 0.5270758526037317 | 0.2018863441926098 |
| 0.7122080103426784 | 0.5692058762983871 | 0.9888172273289062 |
| 0.8728182350665448 | 0.5720156179150462 | 0.9875864797043052 |
| 0.9263903525651261 | 0.5309386343841671 | 0.1944069309136111 |
| 0.8104573094815865 | 0.5526292928325084 | 0.3376780311854971 |
| 0.5722023464250634 | 0.3287609945460699 | 0.3327938683943793 |
| 0.6922291515542938 | 0.3727037084265006 | 0.1924844548770565 |
| 0.7292092276932437 | 0.3272180959317666 | 0.9800380320353388 |
| 0.8839834639691659 | 0.3267100602508123 | 0.9924559451953445 |
| 0.9397620289578973 | 0.3761211888041459 | 0.1924766242808802 |
| 0.9182918536508585 | 0.4452135329721877 | 0.8574942823633614 |
| 0.7994137510816263 | 0.4741638732551346 | 0.7168977971565220 |
| 0.7733587192752353 | 0.4379056096999865 | 0.4912825927277640 |
| 0.6153682661677250 | 0.4290285634366360 | 0.4915233713234793 |
| 0.5682276468161394 | 0.4696558732275429 | 0.7041468179803826 |
| 0.6759280729538973 | 0.4477412699894876 | 0.8566645520955630 |
| 0.9200345422335033 | 0.6778620474657474 | 0.8326822932507338 |
| 0.7691578202191469 | 0.6693218282086789 | 0.4646444088963730 |
| 0.6140632511845824 | 0.6734821851460056 | 0.4880762263438876 |
| 0.5604540282350051 | 0.6279195720077323 | 0.6985344435781504 |
| 0.6727837690182339 | 0.6749987656363563 | 0.8257403454373915 |
| 0.5775793107771072 | 0.9452759317054260 | 0.3588965065277553 |
| 0.6980100962750845 | 0.9736536153139339 | 0.2159540046380863 |
| 0.7194201132208125 | 0.9381781207454479 | 0.9939843956780617 |
| 0.8793240959672676 | 0.9346204446303845 | 0.9953428199004972 |
| 0.9315292984694622 | 0.9705942979156940 | 0.2048396127274849 |
| 0.8224348873753697 | 0.9469148891823853 | 0.3554697524866105 |
| 0.5783166510315532 | 0.1736012164884958 | 0.3300864718133398 |
| 0.6975951174446067 | 0.1313766297419352 | 0.1939297731559244 |
| 0.7320827848373679 | 0.1711294697566058 | 0.9732959999973677 |
| 0.8868112505630721 | 0.1738560078385752 | 0.9862512678374189 |
| 0.9362990731839979 | 0.1283791333132389 | 0.1988519173441595 |
| 0.8198928648112151 | 0.1720328864368915 | 0.3306747133249950 |
| 0.9230035234880476 | 0.0552561220879332 | 0.8575155317772319 |
| 0.8024020734136278 | 0.0264146981639979 | 0.7111975879340396 |
| 0.7807322974877265 | 0.0657565305952673 | 0.4931334560628072 |
| 0.6205983427915637 | 0.0699645671021371 | 0.4906225903052722 |

**Structure files (CONTCAR) involved in this work:**

|                    |                    |                    |
|--------------------|--------------------|--------------------|
| 0.5678606446463212 | 0.0322665109988196 | 0.6993789183421555 |
| 0.6785859758012069 | 0.0534254505077168 | 0.8498254303170769 |
| 0.9230551994552670 | 0.8302975219219543 | 0.8379668834765062 |
| 0.8031729822909173 | 0.8693998491282396 | 0.6965506095825046 |
| 0.7700803764899433 | 0.8271562769909143 | 0.4786521794100250 |
| 0.6151807080641948 | 0.8271137520409353 | 0.4909028870944838 |
| 0.5638788040474763 | 0.8752077882616049 | 0.6982786884248066 |
| 0.6786238033842028 | 0.8337576429134573 | 0.8332523820853027 |
| 0.4226411714954776 | 0.4423273936716295 | 0.6476425676770771 |
| 0.3051911151687245 | 0.4696507790677700 | 0.7908886180381278 |
| 0.2804700529110683 | 0.4457655732940378 | 0.0160680452126762 |
| 0.1223996946191885 | 0.4372922779752138 | 0.0165349869603215 |
| 0.0639911682977517 | 0.4683786618820042 | 0.8049873016940599 |
| 0.1787047668297680 | 0.4348958462044516 | 0.6679693553167564 |
| 0.4149895429306794 | 0.6737296015692414 | 0.6672066411380790 |
| 0.2993890193242665 | 0.6278265341212083 | 0.7998097563746218 |
| 0.2666670270557865 | 0.6693697613988709 | 0.0184614250781021 |
| 0.1110441787504268 | 0.6727497433415083 | 0.0105709032226521 |
| 0.0629966759883123 | 0.6273376515286136 | 0.7966983155602563 |
| 0.1778909777144873 | 0.6716703915085057 | 0.6643285063260834 |
| 0.0723233094658396 | 0.5593808353904421 | 0.1512350436132226 |
| 0.1916283591553861 | 0.5311846302645077 | 0.2915758611210297 |
| 0.2144212247259238 | 0.5553702717229062 | 0.5185184301044825 |
| 0.3733641353346430 | 0.5656042034088690 | 0.5153305122382315 |
| 0.4295467509533258 | 0.5321651139560302 | 0.3043322923810364 |
| 0.3179479576777356 | 0.5655244245573143 | 0.1653357994934943 |
| 0.0844140099717627 | 0.3272484555493382 | 0.1660492789379956 |
| 0.1977159775819267 | 0.3729139588482098 | 0.3014199246913996 |
| 0.2310499081626585 | 0.3315267852191927 | 0.5195316306048305 |
| 0.3866203160060661 | 0.3281300637611624 | 0.5081922854992370 |
| 0.4306823869215209 | 0.3745587817713467 | 0.2938094763868490 |
| 0.3166530204885194 | 0.3295375003496179 | 0.1624899600483168 |
| 0.3588476748140119 | 0.0707046656252226 | 0.7221386347854849 |
| 0.3157147848917461 | 0.0530255173434164 | 0.9069058386211026 |
| 0.2016858092110705 | 0.0498644235975952 | 0.0095777338290924 |
| 0.0927992065630099 | 0.0709312861099164 | 0.9009969744859671 |
| 0.1034133796786708 | 0.0651324009620835 | 0.7038341765358832 |
| 0.2292853461521421 | 0.0531173884734373 | 0.7590711657054721 |
| 0.3601467767900271 | 0.8283210684151590 | 0.7527623870637081 |
| 0.3006452578035576 | 0.8628939047610249 | 0.9195783278015419 |
| 0.1886056055832042 | 0.8509335808487748 | 0.0223990041807543 |
| 0.0884546050083452 | 0.8325222592365402 | 0.8960074893964582 |
| 0.1021673348373981 | 0.8427620458624726 | 0.7004511840142578 |
| 0.2287418946211438 | 0.8501789223778569 | 0.7549417410751964 |
| 0.3147770609188132 | 0.9516418501898602 | 0.7737445407664305 |
| 0.0877045320156446 | 0.9531009650288028 | 0.8105799969208510 |
| 0.4332435876220632 | 0.1273630528258640 | 0.5820286056803149 |
| 0.4121853435263606 | 0.9964253829446027 | 0.5742702074072467 |
| 0.3924539095138976 | 0.8645767818128209 | 0.5679233029356113 |
| 0.1957651099723692 | 0.1384177907628127 | 0.6154639204444203 |
| 0.1890908792727773 | 0.0059052908348628 | 0.5825099922723045 |
| 0.1947453297622498 | 0.8722875568685171 | 0.5641597228148090 |
| 0.9876679673868854 | 0.0414259052381199 | 0.7873277452008721 |

**Structure files (CONTCAR) involved in this work:**

|                    |                    |                    |
|--------------------|--------------------|--------------------|
| 0.9850361064020582 | 0.8700959039295318 | 0.7850181077059240 |
| 0.1405477780164461 | 0.9319827619381134 | 0.2203980870568563 |
| 0.1831711562343563 | 0.9494623065366627 | 0.4055887424015107 |
| 0.2969580775614009 | 0.9490761806799259 | 0.5087082496693603 |
| 0.4068290288949982 | 0.9313806946860975 | 0.4019433823106308 |
| 0.3963226854354863 | 0.9355606963998749 | 0.2045583348171564 |
| 0.2701214991679570 | 0.9474559566342245 | 0.2584231677013995 |
| 0.1407421158200815 | 0.1739786534601867 | 0.2506726382531626 |
| 0.1963011886696621 | 0.1384909032819404 | 0.4199620998669725 |
| 0.3105424286080418 | 0.1499013499513427 | 0.5169771506482806 |
| 0.4135560644089579 | 0.1680127466687882 | 0.3949067973690256 |
| 0.3971296201147471 | 0.1588035409864590 | 0.1996025422967143 |
| 0.2719118516744788 | 0.1523891325087385 | 0.2593831484754578 |
| 0.1860275410822784 | 0.0504149254315474 | 0.2720257764943428 |
| 0.4155201771387302 | 0.0480199104748175 | 0.3082342672052606 |
| 0.0651946196958610 | 0.8738691540815864 | 0.0826912450923524 |
| 0.0850239897394432 | 0.0047984459134242 | 0.0723982092969601 |
| 0.1071821016461373 | 0.1362689384641287 | 0.0675709331719302 |
| 0.3051080850404607 | 0.8616917069782779 | 0.1152423307580584 |
| 0.3106820487056062 | 0.9940731261682517 | 0.0819859614144333 |
| 0.3021939369690171 | 0.1277246126707235 | 0.0676999708249304 |
| 0.5126602005970952 | 0.9557370150995914 | 0.2879260109596091 |
| 0.5159901333892047 | 0.1330570628601535 | 0.2795112377218744 |
| 0.6392028080569299 | 0.5591108237614403 | 0.2844228695798482 |
| 0.6899203372520331 | 0.5761977342742244 | 0.1052050524425261 |
| 0.7927968839055077 | 0.5614171760132546 | 0.9773966997957667 |
| 0.8932625729760238 | 0.5753152800808222 | 0.1055301247529873 |
| 0.8870561650192309 | 0.5413610942954955 | 0.3006007242506180 |
| 0.7635688971878279 | 0.5259286639351249 | 0.2491504905370167 |
| 0.6385534153097607 | 0.3362901251294300 | 0.2657761154238070 |
| 0.6891523397985047 | 0.3346522283752777 | 0.0846367769547072 |
| 0.8065952124038879 | 0.3515662595971149 | 0.9934192428697997 |
| 0.9121589533275355 | 0.3259404362163518 | 0.1066051136316040 |
| 0.9038000949083966 | 0.3589565577014904 | 0.2989603881270392 |
| 0.7655698796670307 | 0.3693451408884456 | 0.2400373388078628 |
| 0.6680045356172789 | 0.4506271339696930 | 0.1746000445140510 |
| 0.9224363493837258 | 0.4528362374510917 | 0.1599644671532494 |
| 0.5686893089705092 | 0.6271428651061440 | 0.4148956645880403 |
| 0.5843943792555926 | 0.4965973881494727 | 0.4416240288590597 |
| 0.5818566890831656 | 0.3626019238245159 | 0.4429720049171759 |
| 0.7986344569193680 | 0.6312454007252991 | 0.3658079954935495 |
| 0.7954229324908556 | 0.5120167320417973 | 0.4437602404216630 |
| 0.8205759324579470 | 0.3813801545640657 | 0.4398579435997380 |
| 0.0037165334036563 | 0.5517995344817357 | 0.2154899969525251 |
| 0.0198067161045390 | 0.3684134213276729 | 0.2066470367489338 |
| 0.8545249545844179 | 0.4346124001374667 | 0.7834827115788517 |
| 0.7897495183104456 | 0.4372021371177983 | 0.6094286229357185 |
| 0.6953453279880774 | 0.4258500461443982 | 0.4685792295893949 |
| 0.6017368741947983 | 0.4293088012731124 | 0.6106181786684176 |
| 0.6020301587607406 | 0.4444079840776309 | 0.8075336859183545 |
| 0.7279916582283525 | 0.4749791187667303 | 0.7723978208631808 |
| 0.8600277422921854 | 0.6810034698240206 | 0.7545087932333937 |
| 0.8144804029633830 | 0.6445737839041270 | 0.5610899479814403 |

**Structure files (CONTCAR) involved in this work:**

|                    |                    |                    |
|--------------------|--------------------|--------------------|
| 0.6917973134126416 | 0.6477856894867096 | 0.4848237877578971 |
| 0.5855274237409943 | 0.6687965577147278 | 0.6005806404666414 |
| 0.5942586248008745 | 0.6614959932012611 | 0.7969993366646674 |
| 0.7191120852285101 | 0.6503153041931033 | 0.7342990357787658 |
| 0.8249813515244512 | 0.5506226304309003 | 0.6946291076308166 |
| 0.5813851823655019 | 0.5493827636414819 | 0.6874179721327438 |
| 0.9279654146392928 | 0.3775423170105267 | 0.9239719043046850 |
| 0.9092331278947323 | 0.5091324820557279 | 0.9318355712037960 |
| 0.8974835146016110 | 0.6416205949132094 | 0.9371831372995978 |
| 0.6950956158239191 | 0.3728958673361727 | 0.8937178258426621 |
| 0.6765499050548424 | 0.5009368698495299 | 0.9482647766038053 |
| 0.6881393166483910 | 0.6353988453626949 | 0.9297423362493964 |
| 0.4892396264387328 | 0.4531374948077209 | 0.7141422971460302 |
| 0.4796428426390769 | 0.6328647493293043 | 0.7081793343728642 |
| 0.6434047583241798 | 0.9393807085686143 | 0.2892213505894700 |
| 0.6987869441420989 | 0.9330443589152462 | 0.1108418550856510 |
| 0.7997436017850680 | 0.9467241417383497 | 0.9809370225755476 |
| 0.8984358902559381 | 0.9288237035483351 | 0.1127696984539162 |
| 0.8975386766106308 | 0.9490838862721306 | 0.3100925913909113 |
| 0.7713222468818944 | 0.9683557860927003 | 0.2667832309693122 |
| 0.6412370999552660 | 0.1735029336709405 | 0.2542354831863768 |
| 0.6954889407102807 | 0.1571534971980060 | 0.0792097029500028 |
| 0.8098302986224688 | 0.1475884684114517 | 0.9821929656118267 |
| 0.9140787858558813 | 0.1701403989235453 | 0.1000113293018812 |
| 0.8968874595311188 | 0.1557780777167201 | 0.2964934072595519 |
| 0.7710246682215038 | 0.1430140448304674 | 0.2421398175572921 |
| 0.6787465240948489 | 0.0519271535575740 | 0.1980423031180065 |
| 0.9195434298511714 | 0.0496147925512223 | 0.1811232048048107 |
| 0.5694535604106410 | 0.8757094601068915 | 0.4217042322767356 |
| 0.5819287945750579 | 0.0076965236328105 | 0.4371508593419962 |
| 0.5996948254127857 | 0.1397771086216203 | 0.4360684177665546 |
| 0.8083464858416481 | 0.8709884572619875 | 0.3945247516235503 |
| 0.8164725983136190 | 0.9986685133188669 | 0.4486796035747170 |
| 0.8052072213494462 | 0.1325605109201290 | 0.4352651859169588 |
| 0.0105261087536431 | 0.9540734921612396 | 0.2166712183640719 |
| 0.0162833357269196 | 0.1377342507812113 | 0.2161428924198858 |
| 0.8570808113104571 | 0.0571185818143006 | 0.7876129718794254 |
| 0.8013893339498938 | 0.0718441429305479 | 0.6103322477766767 |
| 0.7002925369829698 | 0.0570438731059648 | 0.4811750573612770 |
| 0.5984777823186016 | 0.0758270747050366 | 0.6070686894912568 |
| 0.6035864376062894 | 0.0523394011294693 | 0.8039969078542845 |
| 0.7290832052065257 | 0.0279672006075880 | 0.7626905841715114 |
| 0.8593713897344946 | 0.8331012403318476 | 0.7638972956462311 |
| 0.8051745884434578 | 0.8342234923514265 | 0.5872441855415098 |
| 0.6927067100715198 | 0.8519501694195309 | 0.4858117866633750 |
| 0.5893902001958305 | 0.8289318717969303 | 0.6057421601114622 |
| 0.6027457727553015 | 0.8532408730770575 | 0.7997020890244655 |
| 0.7296501973747698 | 0.8596174722263977 | 0.7461421379611547 |
| 0.8204062284117349 | 0.9487992107327540 | 0.6848275654982484 |
| 0.5794512896159750 | 0.9533664473356546 | 0.6725878470450363 |
| 0.9319755489651604 | 0.1276518775577557 | 0.9125228567900693 |
| 0.9183561450800914 | 0.9972415160450810 | 0.9431474209085852 |
| 0.9028969960113534 | 0.8648046529281220 | 0.9437937995462278 |

**Structure files (CONTCAR) involved in this work:**

|                    |                    |                    |
|--------------------|--------------------|--------------------|
| 0.6959638715476258 | 0.1294597445081920 | 0.8844227227337068 |
| 0.6827295738680277 | 0.0035948391192315 | 0.9459144113899718 |
| 0.6955661605211113 | 0.8697171432617884 | 0.9390767949423081 |
| 0.4889486558364780 | 0.0477635589319116 | 0.7153855166677315 |
| 0.4841518195233783 | 0.8645530198539479 | 0.7145657775376485 |
| 0.3594527702255488 | 0.4306116888202589 | 0.7220004252431594 |
| 0.3160166146353161 | 0.4499785490701204 | 0.9071988200392065 |
| 0.2004596726310521 | 0.4579129312164888 | 0.0059830341253077 |
| 0.0879818329535507 | 0.4329431689746912 | 0.9076526760789387 |
| 0.1030811484202027 | 0.4331229946971712 | 0.7120905578450465 |
| 0.2299177547096266 | 0.4472808369361957 | 0.7601054164787479 |
| 0.3578674377707972 | 0.6744918570153604 | 0.7534150581751556 |
| 0.3000319845539073 | 0.6363567785711759 | 0.9197069004347476 |
| 0.1882199874713878 | 0.6483757645420689 | 0.0223688515604240 |
| 0.0887504799960865 | 0.6678292698493007 | 0.8945926273192916 |
| 0.1009729696446775 | 0.6574069216837031 | 0.6984856719801831 |
| 0.2267851044197814 | 0.6502057968211785 | 0.7565146203269714 |
| 0.3144027909120452 | 0.5498533312890158 | 0.7710941380851839 |
| 0.0815773071700907 | 0.5480760871804069 | 0.8081642678448501 |
| 0.4328671213105151 | 0.3766327234102392 | 0.5768843942331121 |
| 0.4125389844767167 | 0.5076515836600749 | 0.5767936286630775 |
| 0.3843412519125269 | 0.6382806028867329 | 0.5676637521283434 |
| 0.1933894825371834 | 0.3625801492457263 | 0.6164231241024631 |
| 0.1841972196574607 | 0.4954146478932323 | 0.5870186584036962 |
| 0.1952748046764362 | 0.6281800282338429 | 0.5648959638773898 |
| 0.9844583283929492 | 0.4563570343327689 | 0.7887938946584131 |
| 0.9830086218605393 | 0.6362999908897770 | 0.7834410040957953 |
| 0.1346669651412477 | 0.5699533160130239 | 0.2273311734112041 |
| 0.1809512244807523 | 0.5496282598264454 | 0.4083893686435506 |
| 0.2946472429434122 | 0.5465769528577946 | 0.5109294521092157 |
| 0.4037042091301375 | 0.5705742984970638 | 0.4037803831392708 |
| 0.3937422915209173 | 0.5656712501564399 | 0.2077758616311163 |
| 0.2658625060680400 | 0.5545634063974076 | 0.2576418923215805 |
| 0.1394422242321983 | 0.3261029253200150 | 0.2549368856675658 |
| 0.1964504817544701 | 0.3645187655540979 | 0.4214495857706290 |
| 0.3094244811107476 | 0.3525679100589471 | 0.5208726076335510 |
| 0.4079988891450735 | 0.3316427829289882 | 0.3914541555830905 |
| 0.3933143077326041 | 0.3461105495830756 | 0.1944621042185730 |
| 0.2698361213541305 | 0.3498231567094925 | 0.2577752456584753 |
| 0.1828048436344593 | 0.4508409786766769 | 0.2722041121522150 |
| 0.4106173416127489 | 0.4527978037604765 | 0.3120961217380084 |
| 0.0644762857526072 | 0.6247748894246908 | 0.0795497434579232 |
| 0.0830678753938151 | 0.4929554350010046 | 0.0827719320868994 |
| 0.1156100205212985 | 0.3636238885917303 | 0.0677737842503786 |
| 0.3044172568574359 | 0.6383239420800115 | 0.1149650749211930 |
| 0.3109885747689459 | 0.5048569642561281 | 0.0853200841600995 |
| 0.2955491740525229 | 0.3723084063325235 | 0.0640408348228237 |
| 0.5094491254105146 | 0.5416175339591592 | 0.2915559973977811 |
| 0.5104654890656412 | 0.3662275244666778 | 0.2760042636915371 |
| 0.4358683766018575 | 0.7502603514125228 | 0.6401551874006748 |
| 0.1882252223462103 | 0.7502182943998957 | 0.6364905101645688 |
| 0.2759494866112622 | 0.7498980193391214 | 0.0181466081329771 |
| 0.1027901290912055 | 0.7496094888240402 | 0.0484628906810355 |

**Structure files (CONTCAR) involved in this work:**

|                    |                    |                    |
|--------------------|--------------------|--------------------|
| 0.0638215559077371 | 0.2509664562056972 | 0.1377866503451182 |
| 0.3089269439336483 | 0.2505147409348939 | 0.1356650637638143 |
| 0.2224727589886043 | 0.2508990874448402 | 0.5197469261079852 |
| 0.3952790403615618 | 0.2513561798202752 | 0.5463658901788357 |
| 0.5550985526433280 | 0.2502599402849676 | 0.3513220760525113 |
| 0.8093697297115107 | 0.2505433023199428 | 0.3475374622835160 |
| 0.7267532311558510 | 0.2497905832241847 | 0.9430527821314012 |
| 0.8910207263465467 | 0.2512668290890641 | 0.9477380522330981 |
| 0.9453169167957609 | 0.7534668834922083 | 0.8606543028668810 |
| 0.6847102562913552 | 0.7539091723860989 | 0.8499990315514308 |
| 0.7750181742041248 | 0.7489634093419412 | 0.4449098798544729 |
| 0.6094606832283267 | 0.7506080581210075 | 0.4495175775457302 |
| 0.9324835272212352 | 0.4964119185795688 | 0.5102655038154775 |
| 0.8191936709010879 | 0.3342227512972671 | 0.3255709614310127 |
| 0.7990588321116586 | 0.6367553783901694 | 0.6943556341108061 |
| 0.9208284672302245 | 0.4135843759020982 | 0.4316709722541550 |
| 0.8754306509283309 | 0.5616720527780301 | 0.5574936063389548 |
| 0.0293299940591187 | 0.4866359396633148 | 0.5153497541858633 |
| 0.0510783514115237 | 0.4492169615759816 | 0.5651041121649856 |
| 0.0587125398721619 | 0.4972941652699361 | 0.4483948899588184 |
| 1.0007741632850993 | 0.4274795487635984 | 0.4622426153358342 |
| 0.0213809060584297 | 0.5335404900694823 | 0.5575082862562359 |

**Figure S6(a) FS**

Si O Al Zn C H

1.0000000000000000

20.0219999999999985 0.0000000000000000 0.0000000000000000

0.0000000000000000 19.8990000000000009 0.0000000000000000

0.0000000000000000 0.0000000000000000 13.3829999999999991

94 193 2 2 1 4

Selective dynamics

Direct

|                    |                    |                    |   |   |   |
|--------------------|--------------------|--------------------|---|---|---|
| 0.4227767912639683 | 0.0598193632324528 | 0.6486277642447016 | T | T | T |
| 0.3046988158611332 | 0.0320787010825334 | 0.7911409750519248 | T | T | T |
| 0.2822405212913830 | 0.0567212220297451 | 0.0171075314156072 | T | T | T |
| 0.1222071272148749 | 0.0655444642867082 | 0.0131041438856125 | T | T | T |
| 0.0677496269245599 | 0.0323201311821840 | 0.8011575756822522 | T | T | T |
| 0.1800462035445134 | 0.0657009838242661 | 0.6640278739485526 | T | T | T |
| 0.4186500666737402 | 0.8275053592123075 | 0.6685159936424757 | T | T | T |
| 0.3005859305674322 | 0.8733971892007562 | 0.7994618410072154 | T | T | T |
| 0.2671411771229557 | 0.8307471422669130 | 0.0182856260636732 | T | T | T |
| 0.1111878964279065 | 0.8270264198731574 | 0.0117299436089550 | T | T | T |
| 0.0657203470544440 | 0.8750722837282916 | 0.7980804186919517 | T | T | T |
| 0.1786021195980562 | 0.8291771205361700 | 0.6636161737687643 | T | T | T |
| 0.0759821777126857 | 0.9420182847588457 | 0.1482331790225958 | T | T | T |
| 0.1949574712462891 | 0.9699077208346264 | 0.2896007299813121 | T | T | T |
| 0.2163782767615255 | 0.9442049267013519 | 0.5157178150004459 | T | T | T |
| 0.3766509271910978 | 0.9356884500213259 | 0.5135106331075940 | T | T | T |
| 0.4329039082373057 | 0.9683541401254827 | 0.3010486111987495 | T | T | T |
| 0.3198457087952845 | 0.9348994235574775 | 0.1638887820450447 | T | T | T |
| 0.0811298549680407 | 0.1741776969843256 | 0.1682006286880082 | T | T | T |
| 0.1990570674822984 | 0.1284554054162522 | 0.2994968648226246 | T | T | T |
| 0.2316022790332710 | 0.1700181173707984 | 0.5173118509512188 | T | T | T |
| 0.3878688263917136 | 0.1739542410391847 | 0.5095334885785986 | T | T | T |

**Structure files (CONTCAR) involved in this work:**

|                    |                    |                    |   |   |   |
|--------------------|--------------------|--------------------|---|---|---|
| 0.4355209290325050 | 0.1267845543576389 | 0.2957809654889950 | T | T | T |
| 0.3202084048776729 | 0.1726036752308172 | 0.1651661976270322 | T | T | T |
| 0.5755707480901000 | 0.5557152761486022 | 0.3572831217279501 | T | T | T |
| 0.6890940951543517 | 0.5262453315988619 | 0.2028301900805911 | T | T | T |
| 0.7139572471407586 | 0.5687288512875864 | 0.9888402785123949 | T | T | T |
| 0.8742524822579364 | 0.5716387077193811 | 0.9867454052190531 | T | T | T |
| 0.9270986025916125 | 0.5310462252808745 | 0.1940406821305311 | T | T | T |
| 0.8116325154841648 | 0.5524192853238497 | 0.3375523471311060 | T | T | T |
| 0.5729025253930330 | 0.3282767563723450 | 0.3320533835462844 | T | T | T |
| 0.6925693586846267 | 0.3724718755982869 | 0.1920777575490432 | T | T | T |
| 0.7306826685641379 | 0.3275629420141797 | 0.9785740031807246 | T | T | T |
| 0.8854909696133240 | 0.3266167545463537 | 0.9922538545452030 | T | T | T |
| 0.9398781602417547 | 0.3761711998079895 | 0.1942718394630814 | T | T | T |
| 0.9195560275918554 | 0.4447163319409581 | 0.8575592655732481 | T | T | T |
| 0.8005800920499440 | 0.4732813209522531 | 0.7171789694579589 | T | T | T |
| 0.7754240814062544 | 0.4369786824579171 | 0.4911143020844691 | T | T | T |
| 0.6171880115829759 | 0.4295043901688944 | 0.4898271590591272 | T | T | T |
| 0.5694812707878197 | 0.4695640940141371 | 0.7019877520856674 | T | T | T |
| 0.6770275185415651 | 0.4481632868815623 | 0.8556948624502714 | T | T | T |
| 0.9209310278158895 | 0.6776262711192822 | 0.8314286325815134 | T | T | T |
| 0.7691452608310601 | 0.6692099964213627 | 0.4642011346298405 | T | T | T |
| 0.6141478305500284 | 0.6737542150075142 | 0.4882036860831364 | T | T | T |
| 0.5611281992729320 | 0.6277235403474036 | 0.6980383615850412 | T | T | T |
| 0.6744265199156024 | 0.6736443312897936 | 0.8253219662337796 | T | T | T |
| 0.5775446906570068 | 0.9453828303786045 | 0.3585863911477939 | T | T | T |
| 0.6980368106726688 | 0.9734161469140464 | 0.2153661230793323 | T | T | T |
| 0.7195068739362367 | 0.9370292068299678 | 0.9935670267861818 | T | T | T |
| 0.8794523431317761 | 0.9340981323022506 | 0.9950228750753977 | T | T | T |
| 0.9312940772201588 | 0.9710662668035663 | 0.2046965540297702 | T | T | T |
| 0.8224785305380913 | 0.9470387485622117 | 0.3554846725576014 | T | T | T |
| 0.5782929527788044 | 0.1733309306833564 | 0.3304746052216043 | T | T | T |
| 0.6976322169855464 | 0.1311066504453945 | 0.1937529849451071 | T | T | T |
| 0.7322799777181962 | 0.1712630536150009 | 0.9733492718645577 | T | T | T |
| 0.8870939109582007 | 0.1737917018741463 | 0.9862180268815931 | T | T | T |
| 0.9360353717951193 | 0.1288543093745491 | 0.1992567297034621 | T | T | T |
| 0.8194586113263586 | 0.1726177664853451 | 0.3304715521090830 | T | T | T |
| 0.9230556382121909 | 0.0550309360932663 | 0.8571512747883495 | T | T | T |
| 0.8024825234322844 | 0.0266095997783643 | 0.7106458515984330 | T | T | T |
| 0.7808505211091209 | 0.0661546502113037 | 0.4927187493772290 | T | T | T |
| 0.6207946647441018 | 0.0698378257710437 | 0.4906396977619521 | T | T | T |
| 0.5682297076624330 | 0.0318631120402261 | 0.6995374147972309 | T | T | T |
| 0.6787875124549301 | 0.0529659723411859 | 0.8499502265627615 | T | T | T |
| 0.9233146422767513 | 0.8302924022502647 | 0.8379218823509570 | T | T | T |
| 0.8032839375476514 | 0.8697325618036611 | 0.6965757324161411 | T | T | T |
| 0.7703923497159478 | 0.8271274921077453 | 0.4788419301664207 | T | T | T |
| 0.6153485808299548 | 0.8271509703189600 | 0.4904857215163778 | T | T | T |
| 0.5641476710259585 | 0.8747057323779249 | 0.6982516761870557 | T | T | T |
| 0.6789902261651795 | 0.8330204586645855 | 0.8327050526994558 | T | T | T |
| 0.4230962035479418 | 0.4421704189792598 | 0.6470495223835321 | T | T | T |
| 0.3049970932421034 | 0.4695174222547342 | 0.7900194595287695 | T | T | T |
| 0.2799992694008658 | 0.4459661155297704 | 0.0153270319380025 | T | T | T |
| 0.1219324810010704 | 0.4369251600412879 | 0.0148095373044420 | T | T | T |
| 0.0640766994389184 | 0.4684808595047963 | 0.8031495462349744 | T | T | T |

**Structure files (CONTCAR) involved in this work:**

|                    |                    |                    |   |   |   |
|--------------------|--------------------|--------------------|---|---|---|
| 0.1781161692197595 | 0.4347523537800683 | 0.6661054237319689 | T | T | T |
| 0.4154353330349992 | 0.6735723535630650 | 0.6677019827502191 | T | T | T |
| 0.2997133128468344 | 0.6277693629654710 | 0.7999204002881671 | T | T | T |
| 0.2666244399578558 | 0.6694684101947881 | 0.0183346260362283 | T | T | T |
| 0.1109732943016529 | 0.6730054749362647 | 0.0102999451005930 | T | T | T |
| 0.0636930309613277 | 0.6273258428241585 | 0.7963362677901722 | T | T | T |
| 0.1785208332492418 | 0.6718610735121403 | 0.6638160959248361 | T | T | T |
| 0.0727419614279323 | 0.5592826375217291 | 0.1499377507038636 | T | T | T |
| 0.1915792235541852 | 0.5314019459090904 | 0.2910973808117350 | T | T | T |
| 0.2143525149601093 | 0.5553545798050004 | 0.5175842476692110 | T | T | T |
| 0.3733105225192730 | 0.5656003071659200 | 0.5152918683309213 | T | T | T |
| 0.4293028271186244 | 0.5323461364690779 | 0.3043583434989893 | T | T | T |
| 0.3176062383065232 | 0.5657541095491969 | 0.1651534244930267 | T | T | T |
| 0.0842418010416653 | 0.3276775704721847 | 0.1658895694135770 | T | T | T |
| 0.1978502618588604 | 0.3732154556699769 | 0.3009372420525005 | T | T | T |
| 0.2303571607568727 | 0.3313385117894148 | 0.5189455208239142 | T | T | T |
| 0.3858984255424248 | 0.3278809706183379 | 0.5082911562541478 | T | T | T |
| 0.4305340540154919 | 0.3746063234311502 | 0.2945072833784557 | T | T | T |
| 0.3168745175602665 | 0.3299837542792304 | 0.1624980489086175 | T | T | T |
| 0.3593143850316555 | 0.0706844972440378 | 0.7224464513378651 | T | T | T |
| 0.3158418315753370 | 0.0526643890468178 | 0.9069485871363659 | T | T | T |
| 0.2017145697678839 | 0.0508458284766352 | 0.0094733523721477 | T | T | T |
| 0.0927568726499361 | 0.0710091341580867 | 0.9009618059036578 | T | T | T |
| 0.1035246262958984 | 0.0652222323152064 | 0.7038481187649624 | T | T | T |
| 0.2295591580844539 | 0.0538341362884087 | 0.7589518202269916 | T | T | T |
| 0.3602353323460978 | 0.8285326894338731 | 0.7525155539862576 | T | T | T |
| 0.3004299468593727 | 0.8631614009586989 | 0.9190996109023660 | T | T | T |
| 0.1885595862790620 | 0.8510781673433836 | 0.0225050677256888 | T | T | T |
| 0.0884844402089398 | 0.8326445930867695 | 0.8959447145850453 | T | T | T |
| 0.1021448215823345 | 0.8426700394256290 | 0.7003804995753855 | T | T | T |
| 0.2287598629941109 | 0.8500917059722927 | 0.7544558494912867 | T | T | T |
| 0.3145034758845779 | 0.9517719944292808 | 0.7730206056033483 | T | T | T |
| 0.0879406870049291 | 0.9531714567689928 | 0.8104261472486396 | T | T | T |
| 0.4332781484707631 | 0.1273035820753783 | 0.5819957718016565 | T | T | T |
| 0.4122047488466363 | 0.9963969131427917 | 0.5741018106204432 | T | T | T |
| 0.3927260531295627 | 0.8645392245112399 | 0.5676340752014007 | T | T | T |
| 0.1953980087107706 | 0.1387248808552245 | 0.6150490346800990 | T | T | T |
| 0.1893789274447100 | 0.0060990433937716 | 0.5827881770650040 | T | T | T |
| 0.1944414334739600 | 0.8725655006614869 | 0.5638038059926148 | T | T | T |
| 0.9877701957717743 | 0.0413029110655704 | 0.7870585683678728 | T | T | T |
| 0.9851172097586400 | 0.8703088418661777 | 0.7849566976518301 | T | T | T |
| 0.1401617502115667 | 0.9317161441124953 | 0.2208134253231286 | T | T | T |
| 0.1831166019445310 | 0.9501638928598595 | 0.4055942460408236 | T | T | T |
| 0.2969666029785269 | 0.9489199038917032 | 0.5086708033429880 | T | T | T |
| 0.4067533795352380 | 0.9314936751487376 | 0.4017257698452853 | T | T | T |
| 0.3962159361185105 | 0.9356544456315670 | 0.2043149074904033 | T | T | T |
| 0.2699066350470302 | 0.9467409846854267 | 0.2583688778218252 | T | T | T |
| 0.1405565152428693 | 0.1738056474185825 | 0.2506015660548883 | T | T | T |
| 0.1966509082635717 | 0.1374471080257110 | 0.4193981415730320 | T | T | T |
| 0.3103242802930188 | 0.1498308543539774 | 0.5173456438053989 | T | T | T |
| 0.4132508842609473 | 0.1679796601839669 | 0.3950582405238869 | T | T | T |
| 0.3971663403370532 | 0.1591719927779071 | 0.1996785478721360 | T | T | T |
| 0.2717500478542766 | 0.1525408561817416 | 0.2585817959052329 | T | T | T |



**Structure files (CONTCAR) involved in this work:**

|                    |                    |                    |   |   |   |
|--------------------|--------------------|--------------------|---|---|---|
| 0.1863207379313899 | 0.0502361016806784 | 0.2704734077153993 | T | T | T |
| 0.4152564160540617 | 0.0481303253669902 | 0.3078870670661931 | T | T | T |
| 0.0650300214687635 | 0.8740563894055999 | 0.0825854686598832 | T | T | T |
| 0.0854690944196518 | 0.0048547189956169 | 0.0723339451375982 | T | T | T |
| 0.1065457171109412 | 0.1365830501979102 | 0.0675100337430797 | T | T | T |
| 0.3053307321395833 | 0.8617053655562120 | 0.1146298810134609 | T | T | T |
| 0.3102380083464386 | 0.9943121878030245 | 0.0823690378109353 | T | T | T |
| 0.3027900214297340 | 0.1280766336256960 | 0.0670951122830625 | T | T | T |
| 0.5125279793189480 | 0.9558712748063881 | 0.2878789220766807 | T | T | T |
| 0.5158252799055297 | 0.1330296529707634 | 0.2799507280663499 | T | T | T |
| 0.6390000921069553 | 0.5601633293444533 | 0.2829042479178211 | T | T | T |
| 0.6935288627051320 | 0.5751774048469626 | 0.1060960435097319 | T | T | T |
| 0.7943375124268054 | 0.5605341737375109 | 0.9752886940523978 | T | T | T |
| 0.8941840202096957 | 0.5754330513243237 | 0.1047518646640062 | T | T | T |
| 0.8880805793974796 | 0.5443570907427445 | 0.2998905418162436 | T | T | T |
| 0.7630269300812190 | 0.5226253704126890 | 0.2539100637672533 | T | T | T |
| 0.6379603758189003 | 0.3345680206624896 | 0.2620665540739798 | T | T | T |
| 0.6908410112096961 | 0.3359500664335865 | 0.0830734516231920 | T | T | T |
| 0.8080948760209744 | 0.3517202789852866 | 0.9916749125146949 | T | T | T |
| 0.9133563603295514 | 0.3265877561442465 | 0.1061822151975167 | T | T | T |
| 0.9044349499024229 | 0.3579972762790769 | 0.2992595705422538 | T | T | T |
| 0.7651221576388344 | 0.3701373245961202 | 0.2421741161158534 | T | T | T |
| 0.6671110060702483 | 0.4503154589066217 | 0.1753617398012870 | T | T | T |
| 0.9218111236237145 | 0.4529751698733250 | 0.1612390648776562 | T | T | T |
| 0.5690189646563992 | 0.6269681120278278 | 0.4154023732693000 | T | T | T |
| 0.5848456919814571 | 0.4962822498103757 | 0.4397765517472184 | T | T | T |
| 0.5854958952530421 | 0.3622481686060714 | 0.4415852104376299 | T | T | T |
| 0.7972031892186139 | 0.6306232289623991 | 0.3649519498838619 | T | T | T |
| 0.8009601309049499 | 0.5117914335453216 | 0.4464732277208041 | T | T | T |
| 0.8222615931847806 | 0.3800864655383510 | 0.4416922815075631 | T | T | T |
| 0.0045040487987874 | 0.5514855750865855 | 0.2150938868693526 | T | T | T |
| 0.0203354723334555 | 0.3696751216940491 | 0.2065919949497855 | T | T | T |
| 0.8548830175065295 | 0.4341161365465893 | 0.7849272469186765 | T | T | T |
| 0.7920462647990726 | 0.4360086108494818 | 0.6094642664914689 | T | T | T |
| 0.6974217126499574 | 0.4290140446805758 | 0.4666336217387705 | T | T | T |
| 0.6041544271849361 | 0.4294287310345208 | 0.6090833542576644 | T | T | T |
| 0.6033550395246601 | 0.4450726236636623 | 0.8058550440595984 | T | T | T |
| 0.7289846606929521 | 0.4764530069853763 | 0.7713948880699258 | T | T | T |
| 0.8610955010948310 | 0.6803421455286185 | 0.7528206702441478 | T | T | T |
| 0.8155243695207475 | 0.6428253085844609 | 0.5588998893800994 | T | T | T |
| 0.6919781260423622 | 0.6480177865403122 | 0.4859926686646774 | T | T | T |
| 0.5858742655322116 | 0.6696726067308409 | 0.6008707505795527 | T | T | T |
| 0.5959274646595006 | 0.6596787336802187 | 0.7968971091937699 | T | T | T |
| 0.7210025476348320 | 0.6475759512509938 | 0.7347301748543713 | T | T | T |
| 0.8275916611878055 | 0.5490628199186726 | 0.6907836575511064 | T | T | T |
| 0.5817980205771673 | 0.5493106127297348 | 0.6841929051554031 | T | T | T |
| 0.9298232262313062 | 0.3769656121179136 | 0.9231680298921150 | T | T | T |
| 0.9109673059948115 | 0.5086498294552994 | 0.9319049559686741 | T | T | T |
| 0.8984423693399541 | 0.6412251412593802 | 0.9357836689817296 | T | T | T |
| 0.6970361207218662 | 0.3732608150679837 | 0.8914361805080351 | T | T | T |
| 0.6774800741700731 | 0.5008774236116221 | 0.9479801512884451 | T | T | T |
| 0.6895806143303707 | 0.6353097881334975 | 0.9306387105839482 | T | T | T |
| 0.4906980670095631 | 0.4523364781061296 | 0.7116951915617722 | T | T | T |

**Structure files (CONTCAR) involved in this work:**

|                    |                    |                    |   |   |   |
|--------------------|--------------------|--------------------|---|---|---|
| 0.4804362785579353 | 0.6330386576551891 | 0.7084836795151045 | T | T | T |
| 0.6431906458817305 | 0.9394489491796245 | 0.2885734038801918 | T | T | T |
| 0.6991548156268920 | 0.9323312234475354 | 0.1106012859302311 | T | T | T |
| 0.7998081255050040 | 0.9453567943297918 | 0.9799195091890257 | T | T | T |
| 0.8982433713609765 | 0.9292741364065665 | 0.1125961817285836 | T | T | T |
| 0.8974811958709005 | 0.9490190621806152 | 0.3098248865360754 | T | T | T |
| 0.7711049412903849 | 0.9680962967402562 | 0.2669473014469315 | T | T | T |
| 0.6411326980984445 | 0.1727145217170317 | 0.2545572428965924 | T | T | T |
| 0.6956678498977193 | 0.1578484008284712 | 0.0794451875455585 | T | T | T |
| 0.8100188808419182 | 0.1477333012151052 | 0.9820391204459121 | T | T | T |
| 0.9141126747427208 | 0.1702930544157726 | 0.1000136257073770 | T | T | T |
| 0.8965478835576950 | 0.1567950448593766 | 0.2963985126961226 | T | T | T |
| 0.7709880949024325 | 0.1421910386808229 | 0.2423229336737742 | T | T | T |
| 0.6787871808119619 | 0.0515554401389362 | 0.1962825542520351 | T | T | T |
| 0.9189221414218035 | 0.0500749777235594 | 0.1817703327934265 | T | T | T |
| 0.5696354881919166 | 0.8757970987804040 | 0.4214888275754108 | T | T | T |
| 0.5820469126543438 | 0.0076597245941982 | 0.4370121914005712 | T | T | T |
| 0.5995091194432590 | 0.1397257649981454 | 0.4366937477866616 | T | T | T |
| 0.8087265384123612 | 0.8710846545024487 | 0.3950538029446337 | T | T | T |
| 0.8166440941949070 | 0.9990201137834610 | 0.4483630473588902 | T | T | T |
| 0.8051616122655795 | 0.1331247511745901 | 0.4352639955407915 | T | T | T |
| 0.0103096022679305 | 0.9546321820051804 | 0.2161956099626394 | T | T | T |
| 0.0160475555727808 | 0.1377844327246885 | 0.2164301197331011 | T | T | T |
| 0.8572084675437317 | 0.0571197179744069 | 0.7871124619158310 | T | T | T |
| 0.8013076573261405 | 0.0721873116160980 | 0.6100072517280957 | T | T | T |
| 0.7004434489523506 | 0.0570855020832863 | 0.4804574458054785 | T | T | T |
| 0.5991449072309740 | 0.0752711052607805 | 0.6073115524009088 | T | T | T |
| 0.6037171287454313 | 0.0520739445730286 | 0.8042790858524428 | T | T | T |
| 0.7292445584396381 | 0.0280859424144358 | 0.7623978829728927 | T | T | T |
| 0.8593430324985403 | 0.8335422726142624 | 0.7643922493940279 | T | T | T |
| 0.8051433588419022 | 0.8337810276734959 | 0.5877297803890978 | T | T | T |
| 0.6929700970042586 | 0.8516875600434072 | 0.4854177843330734 | T | T | T |
| 0.5897144969889165 | 0.8287475293149376 | 0.6053675731129269 | T | T | T |
| 0.6029273284349179 | 0.8520466021854582 | 0.7994890503569471 | T | T | T |
| 0.7297472249817164 | 0.8605169310796518 | 0.7463522405919506 | T | T | T |
| 0.8204919174921107 | 0.9490119612071558 | 0.6837034775730771 | T | T | T |
| 0.5799702655478390 | 0.9528759500316422 | 0.6732483227571906 | T | T | T |
| 0.9320231474707634 | 0.1271642409973768 | 0.9127732547466749 | T | T | T |
| 0.9181905906383496 | 0.9965725948736731 | 0.9421195300513311 | T | T | T |
| 0.9035268213062845 | 0.8640413128718499 | 0.9444709478230854 | T | T | T |
| 0.6959850903202524 | 0.1289290521684461 | 0.8852590179226210 | T | T | T |
| 0.6829323375918871 | 0.0024154424350982 | 0.9452272723554506 | T | T | T |
| 0.6953942390989379 | 0.8682924737500270 | 0.9393053843882406 | T | T | T |
| 0.4892865653430476 | 0.0473736023847062 | 0.7149179931016136 | T | T | T |
| 0.4844009379058942 | 0.8642210687327352 | 0.7143557722431901 | T | T | T |
| 0.3604664360105678 | 0.4309521454147036 | 0.7225697446641096 | T | T | T |
| 0.3156431227514463 | 0.4500957268796913 | 0.9065232440188504 | T | T | T |
| 0.2000183311511842 | 0.4572981956300607 | 0.0039159575805206 | T | T | T |
| 0.0875970006907524 | 0.4324272918722351 | 0.9057024701656188 | T | T | T |
| 0.1022799329159578 | 0.4341965952889941 | 0.7090442940794353 | T | T | T |
| 0.2299919912498980 | 0.4469835331132809 | 0.7578638030032517 | T | T | T |
| 0.3588309883703393 | 0.6741475057000890 | 0.7546141044305128 | T | T | T |
| 0.2999623664430499 | 0.6359858798617000 | 0.9198831647594132 | T | T | T |

**Structure files (CONTCAR) involved in this work:**

|                    |                    |                    |   |   |   |
|--------------------|--------------------|--------------------|---|---|---|
| 0.1881254076171883 | 0.6485891064320163 | 0.0221655877662037 | T | T | T |
| 0.0887413183139087 | 0.6682395977767438 | 0.8942123291004437 | T | T | T |
| 0.1016755322233541 | 0.6573043285397497 | 0.6981240963345794 | T | T | T |
| 0.2275160020888223 | 0.6510153566502218 | 0.7561181791435962 | T | T | T |
| 0.3140429665354461 | 0.5498232841673670 | 0.7705040737795984 | T | T | T |
| 0.0820337260783089 | 0.5481246383437243 | 0.8083986822036604 | T | T | T |
| 0.4326216629993141 | 0.3764156589624289 | 0.5762728080685394 | T | T | T |
| 0.4126960913652337 | 0.5075791807093661 | 0.5764019945814535 | T | T | T |
| 0.3844804743227446 | 0.6379959550233479 | 0.5684810558967738 | T | T | T |
| 0.1926040613373294 | 0.3620186405523633 | 0.6158824301458465 | T | T | T |
| 0.1839001177884569 | 0.4951662470363893 | 0.5851030010735150 | T | T | T |
| 0.1956880530025855 | 0.6281540017489418 | 0.5646146604625085 | T | T | T |
| 0.9843845006697446 | 0.4570306415757808 | 0.7866741913726987 | T | T | T |
| 0.9837488466376664 | 0.6361785415172515 | 0.7818761959023418 | T | T | T |
| 0.1351251420047614 | 0.5701194083664071 | 0.2257636016486560 | T | T | T |
| 0.1805632207127734 | 0.5503039806860555 | 0.4076458550368032 | T | T | T |
| 0.2946445017467738 | 0.5465142261348336 | 0.5104100222156388 | T | T | T |
| 0.4036036560906746 | 0.5710837401638874 | 0.4036680525502144 | T | T | T |
| 0.3935222779436497 | 0.5652675333518270 | 0.2073053095977063 | T | T | T |
| 0.2659649422285242 | 0.5549568185987908 | 0.2579645432470952 | T | T | T |
| 0.1399999710175660 | 0.3262766185891309 | 0.2537854808753486 | T | T | T |
| 0.1966191513622488 | 0.3651617973075734 | 0.4209322615833799 | T | T | T |
| 0.3088353100140643 | 0.3522656933846368 | 0.5218669362235152 | T | T | T |
| 0.4069929512741459 | 0.3314247672022958 | 0.3913981115842217 | T | T | T |
| 0.3936307997815572 | 0.3465297190268742 | 0.1944956203035612 | T | T | T |
| 0.2702014956848611 | 0.3501844995698448 | 0.2578984286068011 | T | T | T |
| 0.1830412784485915 | 0.4511294486016024 | 0.2713508040486309 | T | T | T |
| 0.4107621672268609 | 0.4529458359419127 | 0.3129991303204555 | T | T | T |
| 0.0642734079327267 | 0.6249430738212663 | 0.0789035815005859 | T | T | T |
| 0.0831192130686243 | 0.4932145666160850 | 0.0807076837232428 | T | T | T |
| 0.1150706582924229 | 0.3635546514499491 | 0.0667583448786912 | T | T | T |
| 0.3043474298128314 | 0.6387693800717416 | 0.1151504477160241 | T | T | T |
| 0.3096901712189034 | 0.5055077404787801 | 0.0846362800020778 | T | T | T |
| 0.2956981573113123 | 0.3728750209872093 | 0.0641567434887743 | T | T | T |
| 0.5092202854163266 | 0.5421626692850129 | 0.2913410288529246 | T | T | T |
| 0.5104646277956806 | 0.3663481804344171 | 0.2780864034871895 | T | T | T |
| 0.4358676025255761 | 0.7501365016598933 | 0.6401097521233127 | T | T | T |
| 0.1882846048646595 | 0.7504034096005013 | 0.6355383382723727 | T | T | T |
| 0.2759166656541787 | 0.7500054440198989 | 0.0172855822871380 | T | T | T |
| 0.1026593827076220 | 0.7498022227857326 | 0.0484197753376960 | T | T | T |
| 0.0634255204738921 | 0.2512708184414718 | 0.1384068582052129 | T | T | T |
| 0.3091238363256480 | 0.2509517881991819 | 0.1355402219294935 | T | T | T |
| 0.2218538263601589 | 0.2506941672641797 | 0.5175498073025876 | T | T | T |
| 0.3949789039637577 | 0.2512085469826735 | 0.5466381553071062 | T | T | T |
| 0.5553102076474054 | 0.2500663002274881 | 0.3518028183424676 | T | T | T |
| 0.8075735575144670 | 0.2509984900164726 | 0.3462866225291480 | T | T | T |
| 0.7271450359044926 | 0.2499280489359756 | 0.9424592732696591 | T | T | T |
| 0.8917990408035259 | 0.2510959082679153 | 0.9475035961261923 | T | T | T |
| 0.9456658412250565 | 0.7533123562903090 | 0.8594130005569892 | T | T | T |
| 0.6862439786677956 | 0.7529475886486482 | 0.8468669569347693 | T | T | T |
| 0.7757607859911473 | 0.7487675630112598 | 0.4451802617680581 | T | T | T |
| 0.6096799948065972 | 0.7506539298124956 | 0.4487883251533419 | T | T | T |
| 0.9357218136135529 | 0.4946217822916743 | 0.5061740124323181 | T | T | T |

**Structure files (CONTCAR) involved in this work:**

|                    |                    |                    |   |   |   |
|--------------------|--------------------|--------------------|---|---|---|
| 0.8207545039124369 | 0.3345799116090993 | 0.3250439184709634 | T | T | T |
| 0.8007630188210331 | 0.6356604338680294 | 0.6926365986984220 | T | T | T |
| 0.9260765091569120 | 0.3923982249113936 | 0.4624112547167405 | T | T | T |
| 0.8710674526980794 | 0.5556208447969175 | 0.5524678646971596 | T | T | T |
| 0.0064151884993895 | 0.5103528224499624 | 0.5080274996454796 | T | T | T |
| 0.0333760325600163 | 0.4704224171756241 | 0.5480735561993946 | T | T | T |
| 0.0254857655540691 | 0.5138207415092717 | 0.4309641915680301 | T | T | T |
| 0.9841262078075387 | 0.3499139697127024 | 0.5021417847355913 | T | T | T |
| 0.0159960606596390 | 0.5585299220945354 | 0.5457531513854204 | T | T | T |

**Figure S6(b) IS as same as Figure S2 Cu/ZSM-5****Figure S6(b) TS**

Si O Al Cu C H

|                     |                     |                     |   |   |   |
|---------------------|---------------------|---------------------|---|---|---|
| 1.0000000000000000  |                     |                     |   |   |   |
| 20.0219993591000005 | 0.0000000000000000  | 0.0000000000000000  |   |   |   |
| 0.0000000000000000  | 19.8990001678000006 | 0.0000000000000000  |   |   |   |
| 0.0000000000000000  | 0.0000000000000000  | 13.3830003737999998 |   |   |   |
| 94                  | 195                 | 2                   | 3 | 1 | 4 |

Direct

|                    |                    |                    |
|--------------------|--------------------|--------------------|
| 0.4210347115187439 | 0.0537548747395575 | 0.6404277718687533 |
| 0.3008597917610476 | 0.0256628267385770 | 0.7852952023765843 |
| 0.2793475603061978 | 0.0635401776746175 | 0.0051375829015472 |
| 0.1193431682811342 | 0.0632092348124934 | 0.0049265688662701 |
| 0.0653332705792951 | 0.0244953330994191 | 0.7929368683555774 |
| 0.1769806234346639 | 0.0510260505087604 | 0.6449394912259810 |
| 0.4210802135310484 | 0.8261464063436892 | 0.6644032710099731 |
| 0.3014721039859197 | 0.8682818462608272 | 0.8032533720546546 |
| 0.2700730876830247 | 0.8269467614925445 | 0.0248698282636936 |
| 0.1158689985706166 | 0.8252239443657094 | 0.0165585023976759 |
| 0.0628731532188058 | 0.8635193907335367 | 0.8018454560878087 |
| 0.1797626951269980 | 0.8272442744492537 | 0.6677191278984980 |
| 0.0759047369336720 | 0.9426087963957098 | 0.1453448742130642 |
| 0.1980573524288841 | 0.9709981953109343 | 0.2872781880794935 |
| 0.2189356942101574 | 0.9328397436979132 | 0.5072443710675977 |
| 0.3784564342072702 | 0.9293932822259684 | 0.5081756582643824 |
| 0.4300778738455420 | 0.9695209241825219 | 0.2991683208719831 |
| 0.3227777526547227 | 0.9466630162174128 | 0.1452942957850752 |
| 0.0794480532785724 | 0.1696640127816485 | 0.1598872104541327 |
| 0.1973181113293784 | 0.1284632205116580 | 0.3038767104467469 |
| 0.2287131550015070 | 0.1713195966535055 | 0.5218513966459939 |
| 0.3835984178344984 | 0.1720735572172148 | 0.5079495622627880 |
| 0.4345050823074564 | 0.1264973749357184 | 0.2989187573597964 |
| 0.3189343662500750 | 0.1679702357505087 | 0.1676814213679698 |
| 0.5731884837259817 | 0.5550106017441249 | 0.3556718591956013 |
| 0.6940166773264999 | 0.5240208497723523 | 0.2204505299215360 |
| 0.7118067034636028 | 0.5466231797820693 | 0.9896329296147196 |
| 0.8684446571447196 | 0.5618157669539254 | 0.9868003726416199 |
| 0.9296117677271362 | 0.5289420913969689 | 0.1966843368089226 |
| 0.8210098529781068 | 0.5601927456039154 | 0.3454402178949333 |
| 0.5807764286977637 | 0.3242200069456626 | 0.3286234194133439 |
| 0.6976932552475390 | 0.3669563736468918 | 0.1988502587071140 |
| 0.7321432379272689 | 0.3293836010117023 | 0.9821264297316111 |
| 0.8867789018570448 | 0.3292745448382458 | 0.9944206030037223 |
| 0.9354717586175184 | 0.3705255399323333 | 0.2053429127211091 |

**Structure files (CONTCAR) involved in this work:**

0.8187696157025953 0.3271772104251625 0.3335336081275156  
0.9231620214743013 0.4430315147369013 0.8541238924826758  
0.8055354944478007 0.4652097097326003 0.7109085280905756  
0.7795335157585629 0.4403442089810249 0.4879498145720919  
0.6208662021804346 0.4314207139038672 0.4859648644834044  
0.5660263320204397 0.4619180750160260 0.6961300406713565  
0.6769735703201663 0.4327091196299628 0.8375630997144601  
0.7976294947871860 0.6218576253729694 0.6961946551015573  
0.7650626004876233 0.6709306854340392 0.4763019768800783  
0.6102950843104268 0.6738340614561177 0.4846090094732901  
0.5712873012469518 0.6201925042733125 0.6975425498659528  
0.6783577430521592 0.6640427321002923 0.8427744098095190  
0.5768588148126534 0.9412478498203611 0.3510777554287898  
0.6925737213939887 0.9710352340134197 0.2064402681266684  
0.7187399047586149 0.9496603141675145 0.9814071986987175  
0.8762311741919685 0.9474659085209109 0.9852276407778479  
0.9313747672411670 0.9686010141988362 0.1975350431007494  
0.8154714311799037 0.9332874443356304 0.3305421142382365  
0.5796593325214617 0.1721583135580788 0.3270467805988397  
0.6982832848558078 0.1284584720867467 0.1972433946192347  
0.7346428464088020 0.1676404411566325 0.9790841880908436  
0.8900792411250137 0.1760089309637060 0.9813460776151004  
0.9367585045606162 0.1267750518307379 0.1965721092021016  
0.8216108821505269 0.1719340502079748 0.3300319569812642  
0.9233891665485708 0.0650070368442049 0.8458816280027804  
0.8056624281252762 0.0312933156527999 0.7032736219812182  
0.7832076717324041 0.0560456632942223 0.4795882058866887  
0.6232208200639887 0.0667172485993066 0.4844946326980258  
0.5651394640168197 0.0337395827022005 0.6956879627544376  
0.6804128565814638 0.0652324671885983 0.8272249124149735  
0.9102445934425416 0.8288332628051491 0.8328865242819470  
0.7997252776922174 0.8735560578882879 0.6922879220698299  
0.7679958586618783 0.8276865944327915 0.4781573666317456  
0.6078220128519619 0.8247346188725149 0.4935468353257665  
0.5631423198129323 0.8752425744811910 0.7084987550450538  
0.4207737230906930 0.4434178377811739 0.6421753643220712  
0.3004644617177530 0.4709607714456449 0.7874921191543101  
0.2795116052200843 0.4318729499669996 0.0063550281142133  
0.1198969558317636 0.4311542145038660 0.0070146510429985  
0.0683470835074300 0.4707814820275862 0.7973854961551375  
0.1768752753001344 0.4477733694630414 0.6456445328377252  
0.4246156495866262 0.6701395639641402 0.6623988084601329  
0.3058218304601061 0.6274880830953399 0.8041482222500765  
0.2705822402368008 0.6707919980018333 0.0244019286955467  
0.1174502022724325 0.6720715285485157 0.0121642836199618  
0.0677774371777956 0.6303068061014562 0.8000922716442356  
0.1839861618225847 0.6687293590516444 0.6631758982909808  
0.0750321927938459 0.5550074557844851 0.1389653257500712  
0.1961413818716587 0.5260036485349243 0.2821651419709559  
0.2181954232783735 0.5640540759730690 0.5034585377878886  
0.3773851667803088 0.5664016939793702 0.5071971801582623  
0.4295847755568826 0.5269424850303929 0.2980082235350800  
0.3225057345219760 0.5504385655715782 0.1427886000878652

**Structure files (CONTCAR) involved in this work:**

|                    |                    |                    |
|--------------------|--------------------|--------------------|
| 0.0783007832070083 | 0.3249910476522633 | 0.1632431515029492 |
| 0.1969129072421179 | 0.3682296159608937 | 0.3024202127866912 |
| 0.2298788168604327 | 0.3276712891978134 | 0.5218706817410046 |
| 0.3849639509385031 | 0.3246832162740402 | 0.5098598614700178 |
| 0.4361608626171623 | 0.3699091513134280 | 0.3004136419886718 |
| 0.3200062588206352 | 0.3277180690869109 | 0.1687175193856613 |
| 0.3549631610848746 | 0.0583008216036956 | 0.7098906647394079 |
| 0.2995901500946221 | 0.0693659679814402 | 0.8879927428995800 |
| 0.1992543993595528 | 0.0525574370597324 | 0.0177696649045315 |
| 0.0985264088401207 | 0.0632041739878981 | 0.8879854057355555 |
| 0.1019743646595783 | 0.0470238389798255 | 0.6902449555302035 |
| 0.2276878648603572 | 0.0284431845596418 | 0.7335842313181203 |
| 0.3563449794529131 | 0.8282949037867787 | 0.7374523419823371 |
| 0.3019114406268334 | 0.8366726784480785 | 0.9146151009041745 |
| 0.1924910688277731 | 0.8519398474981179 | 0.0252228675029589 |
| 0.0931380840769008 | 0.8283575912674394 | 0.9009276411091731 |
| 0.1024828414580113 | 0.8363285680412365 | 0.7036940482662736 |
| 0.2277136926437736 | 0.8592019579074220 | 0.7539366587097237 |
| 0.3196784547928442 | 0.9478158297986022 | 0.8089667053512580 |
| 0.0713319078293171 | 0.9442045384887949 | 0.8115822808382973 |
| 0.4286647580575714 | 0.1228511850265460 | 0.5767182719574905 |
| 0.4176650532990530 | 0.9909652266404396 | 0.5625489371232769 |
| 0.4018317067750811 | 0.8583890894598973 | 0.5562376839718300 |
| 0.1915084951295879 | 0.1271856498860258 | 0.6072493112018490 |
| 0.1828099217039341 | 0.9999605369412078 | 0.5506155528255073 |
| 0.1910657934423690 | 0.8656967730475099 | 0.5619686806479941 |
| 0.9875205948415285 | 0.0451245937803738 | 0.7786498207377628 |
| 0.9850850782202577 | 0.8424078739781793 | 0.7916876657079477 |
| 0.1408997578682520 | 0.9388087571810781 | 0.2165983844302980 |
| 0.2016817002881198 | 0.9269965306945702 | 0.3891892929094994 |
| 0.2988548877443925 | 0.9400733588959590 | 0.5256345068030807 |
| 0.3961633178875815 | 0.9271601843348094 | 0.3899229745992118 |
| 0.3971255653190874 | 0.9492820052099135 | 0.1927494365465497 |
| 0.2696768529190813 | 0.9680309783227223 | 0.2313061962245603 |
| 0.1437834407484341 | 0.1658697892189986 | 0.2326583161671514 |
| 0.1924996982183335 | 0.1618606566852067 | 0.4140333577683815 |
| 0.3061474603106402 | 0.1467824107105857 | 0.5119469759015126 |
| 0.4101883099299566 | 0.1715763582666434 | 0.3933700661304669 |
| 0.3962316971617151 | 0.1520490320463349 | 0.1982347582739160 |
| 0.2717037687756255 | 0.1387753023553174 | 0.2571395721119918 |
| 0.1801141773383747 | 0.0488968751796532 | 0.3117494850554917 |
| 0.4169896389210597 | 0.0485864213061190 | 0.3225904087060442 |
| 0.0678586574661850 | 0.8714927091396317 | 0.0862766593902161 |
| 0.0812797555754511 | 0.0026718025261936 | 0.0633572091529107 |
| 0.0963987520359702 | 0.1346777144926198 | 0.0528523905910114 |
| 0.3106913232270992 | 0.8705370447748459 | 0.1067396814089383 |
| 0.3176069544112373 | 0.9987397797361218 | 0.0520508927963917 |
| 0.3014032042703531 | 0.1323231405492417 | 0.0616002387916135 |
| 0.5090435439819391 | 0.9535715099442471 | 0.2879282862139908 |
| 0.5145724970304729 | 0.1338887612738934 | 0.2818235337910671 |
| 0.6383457474985498 | 0.5640420012049073 | 0.2844466556645840 |
| 0.6855145844487744 | 0.5454903885360012 | 0.1039222988051113 |
| 0.7915857108625651 | 0.5350069559175396 | 0.9807193740872795 |

**Structure files (CONTCAR) involved in this work:**

|                    |                    |                    |
|--------------------|--------------------|--------------------|
| 0.8974249793589253 | 0.5656144786994303 | 0.0993076283800436 |
| 0.8954640406260357 | 0.5571112430451911 | 0.2982072273190108 |
| 0.7684527718293721 | 0.5443766291085474 | 0.2555938028589226 |
| 0.6392199276500906 | 0.3203257862119332 | 0.2447799575282920 |
| 0.6941768099052551 | 0.3609915777329378 | 0.0784875538825377 |
| 0.8095120365727966 | 0.3540131939926591 | 0.9868429104364711 |
| 0.9109452147450848 | 0.3267074005019320 | 0.1098708620030510 |
| 0.8960261113545651 | 0.3440451209873731 | 0.3042085246081321 |
| 0.7712332682699065 | 0.3431684695496111 | 0.2368891173557972 |
| 0.6829080356383170 | 0.4438473860835985 | 0.2339016197745202 |
| 0.9167888160936072 | 0.4487164096882008 | 0.1852848346517391 |
| 0.5628837005666428 | 0.6219469686399524 | 0.4233247204761973 |
| 0.5805490515213191 | 0.4907066303429679 | 0.4290721901112460 |
| 0.6104484915852660 | 0.3608539127213538 | 0.4275791524352741 |
| 0.8094701860268601 | 0.6351225157321719 | 0.3895782806966792 |
| 0.8139074634867278 | 0.5044072097501270 | 0.4332512747353953 |
| 0.7955640995230171 | 0.3714052994949000 | 0.4285380919646965 |
| 0.0085186628938622 | 0.5452132921286507 | 0.2063141821269851 |
| 0.0155881869588497 | 0.3612803770995934 | 0.2200656082350987 |
| 0.8591857434403601 | 0.4275200019473739 | 0.7828857001466906 |
| 0.8101666338230499 | 0.4333116082362567 | 0.5995719938549970 |
| 0.6992106867157941 | 0.4521321194021664 | 0.4918121464150212 |
| 0.5900557519923946 | 0.4219618324810989 | 0.5966877689883534 |
| 0.6023330146305133 | 0.4277052015134797 | 0.7919050629001190 |
| 0.7298235224573377 | 0.4540845196686698 | 0.7515721197308629 |
| 0.8556141366162756 | 0.6723846629393834 | 0.7277280775046704 |
| 0.7753852525466075 | 0.6320710760983609 | 0.5809792119108117 |
| 0.6867178620202681 | 0.6644818487058529 | 0.4463865447638591 |
| 0.6056120369671004 | 0.6596493900678073 | 0.6043430419238136 |
| 0.6033825760903651 | 0.6484398346775095 | 0.8017453327751787 |
| 0.7313604944776828 | 0.6303894721705485 | 0.7669277910931498 |
| 0.8233424638905461 | 0.5445357863330041 | 0.7101390789671567 |
| 0.5873785658838924 | 0.5405361508721814 | 0.6865397626366984 |
| 0.9334639578053732 | 0.3802626093656729 | 0.9306604083313359 |
| 0.9133804335315319 | 0.5111383608493891 | 0.9199475105945433 |
| 0.8778760889618846 | 0.6356446206143740 | 0.9328859107485659 |
| 0.6968166758649423 | 0.3598812676934178 | 0.8830707728335482 |
| 0.6743178715125631 | 0.4903929538148359 | 0.9243678638933559 |
| 0.6878917996215564 | 0.6231486418014159 | 0.9530120450622367 |
| 0.4861011584587888 | 0.4542407347202216 | 0.7121962434829020 |
| 0.4911836356843745 | 0.6312005075931325 | 0.7010760934621437 |
| 0.6381250371695265 | 0.9302970876552087 | 0.2724784352531783 |
| 0.6803562398530238 | 0.9556153965377739 | 0.0884843693793179 |
| 0.7974501288532083 | 0.9656743965509651 | 0.9951675195081424 |
| 0.9074591260436502 | 0.9324276798501498 | 0.0945857980866310 |
| 0.8925095019020152 | 0.9349490765417593 | 0.2918487794060772 |
| 0.7676724324965052 | 0.9459070423563649 | 0.2334827699083885 |
| 0.6375569456309116 | 0.1729714995705592 | 0.2418324345110348 |
| 0.6992633780784010 | 0.1347857024145579 | 0.0767452737911064 |
| 0.8134912750389918 | 0.1481375002556681 | 0.9779874663692038 |
| 0.9187121187212146 | 0.1651159897875794 | 0.0932121954487453 |
| 0.8976149230025670 | 0.1621838436220568 | 0.2891633959452061 |
| 0.7700802525833780 | 0.1539820317755920 | 0.2394433335503094 |

**Structure files (CONTCAR) involved in this work:**

|                    |                    |                    |
|--------------------|--------------------|--------------------|
| 0.6853503181252810 | 0.0507812617576745 | 0.2301279914694250 |
| 0.9144292622244322 | 0.0483253986882968 | 0.1908841934028692 |
| 0.5671853054834437 | 0.8756874712350777 | 0.4210730813551410 |
| 0.5907748773771898 | 0.0054237710713684 | 0.4219825902518042 |
| 0.6076756125638000 | 0.1369233029845794 | 0.4277387718701761 |
| 0.7995195629093864 | 0.8596214875862709 | 0.3763847613354270 |
| 0.8039069267952877 | 0.9915852591155224 | 0.4126976209111406 |
| 0.8080872831337867 | 0.1247004128957803 | 0.4261691021200499 |
| 0.0104400158360630 | 0.9547795004589126 | 0.2147226347355130 |
| 0.0169019909604299 | 0.1321480513157140 | 0.2149039196297977 |
| 0.8582490665847873 | 0.0705976221915339 | 0.7746205944142938 |
| 0.8195166453552328 | 0.0512345995199258 | 0.5876330673566414 |
| 0.7030640319470775 | 0.0562019306436747 | 0.4940604300023018 |
| 0.5892277140066741 | 0.0706087614116733 | 0.5935839795742688 |
| 0.6038354511658843 | 0.0689529967106636 | 0.7889540047617303 |
| 0.7300148094726505 | 0.0542740496607860 | 0.7323337244251102 |
| 0.8617000213244526 | 0.8294742058062151 | 0.7366100529813632 |
| 0.8010845827362064 | 0.8678768078518464 | 0.5709932907857492 |
| 0.6874611747193631 | 0.8366355948939871 | 0.4775610456282674 |
| 0.5883301371800700 | 0.8344142629348726 | 0.6095035030549580 |
| 0.5975348452542683 | 0.8465723208530000 | 0.8079427956073444 |
| 0.7299435383445777 | 0.8486631908705323 | 0.7359723954145250 |
| 0.8154884624493633 | 0.9516274047123784 | 0.7224268553768887 |
| 0.5818724484161778 | 0.9542854210403064 | 0.6900006425872933 |
| 0.9356854081507979 | 0.1371438211289000 | 0.8995200898829929 |
| 0.9145228861706118 | 0.0109529573685986 | 0.9361283485902674 |
| 0.8873911669463123 | 0.8825302527889586 | 0.9157736872107317 |
| 0.6981763473835617 | 0.1357880357386440 | 0.8821132594048376 |
| 0.6864234205776957 | 0.0011260324086766 | 0.9025686004783300 |
| 0.7083043410878617 | 0.8709662687208836 | 0.9454413830023277 |
| 0.4856907372817089 | 0.0458664282586047 | 0.7123297871188404 |
| 0.4817515307178992 | 0.8675957432437154 | 0.7159580654147458 |
| 0.3553781116723709 | 0.4385809289867169 | 0.7128694159163430 |
| 0.2965997466023792 | 0.4252527838733300 | 0.8881283923183123 |
| 0.1996064673397279 | 0.4407022800385316 | 0.0245127622886200 |
| 0.1022906133288007 | 0.4288818112513988 | 0.8890398439952661 |
| 0.1021109469122214 | 0.4481062138472613 | 0.6923475039550113 |
| 0.2282347160850582 | 0.4715479047080374 | 0.7328799170779876 |
| 0.3672424847651503 | 0.6634661334334484 | 0.7469615804946144 |
| 0.3006474361557641 | 0.6622901329343405 | 0.9129565933000132 |
| 0.1934627310250407 | 0.6448249182710442 | 0.0276704990714681 |
| 0.1001645717224632 | 0.6710663230817828 | 0.8943503237805063 |
| 0.1082642386694253 | 0.6534762301372774 | 0.6999284293030338 |
| 0.2362972244119322 | 0.6372721804982869 | 0.7436869285614762 |
| 0.3210586460220047 | 0.5475813083596576 | 0.8162071235815189 |
| 0.0795185831738676 | 0.5501508834878948 | 0.8189145196419708 |
| 0.4291845822724630 | 0.3733316674562959 | 0.5810915048162556 |
| 0.4165652594866689 | 0.5052938170283698 | 0.5627823881432321 |
| 0.3985404830849855 | 0.6375787515181819 | 0.5576834011251656 |
| 0.1941180577920313 | 0.3723081376823236 | 0.6077821307463617 |
| 0.1796178412110570 | 0.5000417038171293 | 0.5523521720415029 |
| 0.1954687606903559 | 0.6344684276104221 | 0.5541985090086651 |
| 0.9895923664244567 | 0.4521060871059147 | 0.7868326382076610 |



**Structure files (CONTCAR) involved in this work:**

0.9904638855571976 0.6480474622956302 0.7895668481395365  
0.1390697275971319 0.5594617745914670 0.2124132025610176  
0.1992499967741212 0.5678656479758519 0.3859260074523976  
0.2979288688556515 0.5531158993312645 0.5199625851370666  
0.3969775854921786 0.5695596356147619 0.3895910284968204  
0.3963006971318158 0.5462913232650758 0.1917355003595972  
0.2682162592114700 0.5303868745263679 0.2277183967512644  
0.1429779193130532 0.3276278568800214 0.2356811953640793  
0.1930600324029350 0.3388498972972361 0.4150637592176201  
0.3077306213153837 0.3505556316918891 0.5110273040861234  
0.4137986714319846 0.3258956114569612 0.3967142180930335  
0.3971274300185729 0.3422195270099458 0.2017828073918694  
0.2713639520402113 0.3571260827150604 0.2562874504303432  
0.1782254867041673 0.4476313023919803 0.3031873351216320  
0.4174284288753789 0.4478480922830270 0.3218186482795287  
0.0670618603044662 0.6246156731696793 0.0762170777192787  
0.0810800292004296 0.4932373995205199 0.0602686688266079  
0.0946655822926266 0.3613712159594329 0.0572940302847958  
0.3128962475308148 0.6268870334966816 0.1039611243776437  
0.3171926072594684 0.4981950538654259 0.0497174481634773  
0.3050814558799177 0.3641965603397365 0.0624058687914448  
0.5083390274482394 0.5442513349296692 0.2854421426428887  
0.5163750374562067 0.3635910219823490 0.2828815322837669  
0.4420213210051864 0.7485464255072367 0.6443310917848553  
0.1971181875602349 0.7486605166219729 0.6513934421821851  
0.2751283089440783 0.7488456246535983 0.0577140429474239  
0.1096998520201791 0.7481183688887945 0.0550737919695280  
0.0601730085687824 0.2474248611561504 0.1388013722640755  
0.3073837193144298 0.2479776947676140 0.1541148993374938  
0.2244460081574554 0.2495229406155896 0.5554446843567465  
0.3895567635242072 0.2481358761161026 0.5511895376113526  
0.5592335792030860 0.2483003528266292 0.3571316281983896  
0.8112202710097455 0.2490847778446245 0.3652806854166689  
0.7256606903234439 0.2484906452566440 0.9799007726183291  
0.8929802849616356 0.2542858660435680 0.9493905055240029  
0.9061670490336639 0.7541807050006932 0.8865820028970629  
0.6903325309288525 0.7414768848680732 0.8701204397476121  
0.7881563105103042 0.7487582953483527 0.4831125406113257  
0.5856004073412194 0.7494102257873614 0.4603645393742445  
0.7956374935521674 0.6661593697124103 0.0776739171234642  
0.6939132938355775 0.7543681871125095 0.1520546661584678  
0.8142720792175248 0.7934483905937253 0.0616726070980360  
0.9130585061461215 0.6744418746843256 0.8226259962734239  
0.6794945878409464 0.8259059154301515 0.8342505641121020  
0.7068171806049290 0.6850162652155048 0.0728244985282863  
0.7205896481573526 0.8126466555678579 0.0578517587165348  
0.8451473688935304 0.7173905056284489 0.9942000719089520  
0.8943600796688348 0.7703918873183156 0.2036618003519902  
0.8640268665416796 0.7368273467155051 0.2497001821573589  
0.8492371243033391 0.7881376551948827 0.1368536814605785  
0.9073292938673323 0.8185809832786787 0.2372777036534696  
0.9354080426780053 0.7459940926526615 0.1637595308423771

**Figure S6(b) FS**

**Structure files (CONTCAR) involved in this work:**

Si O Al Cu C H  
1.0000000000000000  
20.0219993591000005 0.0000000000000000 0.0000000000000000  
0.0000000000000000 19.8990001678000006 0.0000000000000000  
0.0000000000000000 0.0000000000000000 13.3830003737999998  
94 195 2 3 1 4

Selective dynamics

Direct

|                    |                    |                    |   |   |   |
|--------------------|--------------------|--------------------|---|---|---|
| 0.4226207352104502 | 0.0540114333852369 | 0.6414247976986076 | T | T | T |
| 0.3036030387795936 | 0.0267454608348812 | 0.7877543717681890 | T | T | T |
| 0.2798777533497522 | 0.0644159065024425 | 0.0071673274014108 | T | T | T |
| 0.1197803733480570 | 0.0655279087307216 | 0.0043368787778144 | T | T | T |
| 0.0666372480852738 | 0.0262357740733715 | 0.7929197684870757 | T | T | T |
| 0.1793934263645356 | 0.0511963718275662 | 0.6489125866385356 | T | T | T |
| 0.4212059981045660 | 0.8268779519609830 | 0.6638411882759813 | T | T | T |
| 0.3058662817455842 | 0.8693630348780681 | 0.8078432220333184 | T | T | T |
| 0.2681633699206990 | 0.8285991671903813 | 0.0255749045866730 | T | T | T |
| 0.1138112026155822 | 0.8259781880165620 | 0.0092978965201642 | T | T | T |
| 0.0661580547328507 | 0.8661493963188371 | 0.7931065691818043 | T | T | T |
| 0.1871783559588940 | 0.8271212654015516 | 0.6688365189230951 | T | T | T |
| 0.0769221135745005 | 0.9434361477727078 | 0.1417784419818672 | T | T | T |
| 0.1959204803420110 | 0.9714966371756889 | 0.2892080654054037 | T | T | T |
| 0.2206502869752046 | 0.9334766191806309 | 0.5065779868738076 | T | T | T |
| 0.3798178245784126 | 0.9309571202425929 | 0.5060853818982223 | T | T | T |
| 0.4328252929347214 | 0.9693382078352197 | 0.2968948711365582 | T | T | T |
| 0.3203781688695062 | 0.9471016657544020 | 0.1510884032702048 | T | T | T |
| 0.0804454716359394 | 0.1708141836321048 | 0.1613335687324310 | T | T | T |
| 0.1968183748789786 | 0.1286169465735079 | 0.3057367423482477 | T | T | T |
| 0.2315213932047546 | 0.1708830662174893 | 0.5224620910663733 | T | T | T |
| 0.3864254560931538 | 0.1720469723748445 | 0.5075447251303864 | T | T | T |
| 0.4356387582916927 | 0.1266731336348700 | 0.2972505283977509 | T | T | T |
| 0.3178952233169176 | 0.1686577233856232 | 0.1697773928578862 | T | T | T |
| 0.5759357052389208 | 0.5552872828070653 | 0.3575053111361029 | T | T | T |
| 0.6960435183503836 | 0.5237555653841127 | 0.2216979347185317 | T | T | T |
| 0.7173712964727276 | 0.5520138637002897 | 0.9932730611212367 | T | T | T |
| 0.8758204001473482 | 0.5683546199752679 | 0.9911895306606056 | T | T | T |
| 0.9313039304042013 | 0.5279913880838861 | 0.2022576811873683 | T | T | T |
| 0.8230054865851739 | 0.5522232642455732 | 0.3550525476871761 | T | T | T |
| 0.5814669965542786 | 0.3240589950101318 | 0.3337703097909552 | T | T | T |
| 0.6974802189045504 | 0.3673094686195452 | 0.1994884215830240 | T | T | T |
| 0.7332093530161130 | 0.3273522076861773 | 0.9816591144758203 | T | T | T |
| 0.8873020797606626 | 0.3306803139163683 | 0.9983891666248221 | T | T | T |
| 0.9365175118252860 | 0.3700697127764293 | 0.2084715669524102 | T | T | T |
| 0.8194003865989450 | 0.3282867690462194 | 0.3360370613778573 | T | T | T |
| 0.9256338827817019 | 0.4461794311032734 | 0.8610800625507409 | T | T | T |
| 0.8069989794949316 | 0.4670308673047933 | 0.7175128228641162 | T | T | T |
| 0.7821825520830302 | 0.4353724382249623 | 0.4968283088229152 | T | T | T |
| 0.6225468196361702 | 0.4318351454239399 | 0.4913486734454625 | T | T | T |
| 0.5677422223514073 | 0.4651561847031669 | 0.7015156611866912 | T | T | T |
| 0.6793843841528463 | 0.4364573360927628 | 0.8466343562634389 | T | T | T |
| 0.7995024548037181 | 0.6233207397519750 | 0.7021456111976200 | T | T | T |
| 0.7647790667673848 | 0.6671735574388209 | 0.4787369904207938 | T | T | T |
| 0.6098539214775524 | 0.6722188212987590 | 0.4880456121875558 | T | T | T |

**Structure files (CONTCAR) involved in this work:**

|                    |                    |                    |   |   |   |
|--------------------|--------------------|--------------------|---|---|---|
| 0.5650169024929701 | 0.6231531648883206 | 0.7007994525973805 | T | T | T |
| 0.6777607248698779 | 0.6634450515102828 | 0.8366005444891748 | T | T | T |
| 0.5789197116643825 | 0.9397286671840124 | 0.3429639956074080 | T | T | T |
| 0.6949226645904096 | 0.9717830273645083 | 0.2002937000611172 | T | T | T |
| 0.7204650033273019 | 0.9471552213000958 | 0.9732916445802529 | T | T | T |
| 0.8799336379938958 | 0.9506333974136973 | 0.9784210772783734 | T | T | T |
| 0.9322701647233743 | 0.9687149657764553 | 0.1939381575041869 | T | T | T |
| 0.8172740105303671 | 0.9333982165105564 | 0.3274537968690107 | T | T | T |
| 0.5806969779719137 | 0.1717091732431174 | 0.3235477409328920 | T | T | T |
| 0.6980891155422451 | 0.1289666776670134 | 0.1907683564544660 | T | T | T |
| 0.7373519594456103 | 0.1662887337451291 | 0.9737404239522359 | T | T | T |
| 0.8926249999416502 | 0.1774176104323657 | 0.9765497834967283 | T | T | T |
| 0.9385936710463375 | 0.1267841336297872 | 0.1915014761601383 | T | T | T |
| 0.8213402199692470 | 0.1721337281241827 | 0.3215468776748293 | T | T | T |
| 0.9239445467033168 | 0.0669303938373398 | 0.8430636782080347 | T | T | T |
| 0.8073464307210724 | 0.0298972688332140 | 0.6959431659411540 | T | T | T |
| 0.7845859532268251 | 0.0564096681462604 | 0.4747967516972547 | T | T | T |
| 0.6244355883692113 | 0.0639906620532295 | 0.4799448085996752 | T | T | T |
| 0.5668715906088480 | 0.0330707493018665 | 0.6924641732816073 | T | T | T |
| 0.6828782197191906 | 0.0632359775874164 | 0.8212425837121914 | T | T | T |
| 0.9185986463599034 | 0.8334035354856137 | 0.8235826703874616 | T | T | T |
| 0.8014383163048522 | 0.8705307684915331 | 0.6865396308354942 | T | T | T |
| 0.7678100684208307 | 0.8269762560657585 | 0.4706444799461257 | T | T | T |
| 0.6109158751648838 | 0.8264383497931015 | 0.4857188846874105 | T | T | T |
| 0.5647190840305514 | 0.8744844189060967 | 0.7021291135315901 | T | T | T |
| 0.4227554689897043 | 0.4422392804791284 | 0.6484460495236150 | T | T | T |
| 0.3035351038801653 | 0.4720586134363052 | 0.7928862500699845 | T | T | T |
| 0.2811094294201615 | 0.4351290929501532 | 0.0143754766331420 | T | T | T |
| 0.1214197873519335 | 0.4328002490341659 | 0.0119088627763635 | T | T | T |
| 0.0704479543809651 | 0.4698262445949043 | 0.8002537714149690 | T | T | T |
| 0.1800955301912582 | 0.4456759773284379 | 0.6527647640458693 | T | T | T |
| 0.4210346086801875 | 0.6720415311287947 | 0.6659117341931052 | T | T | T |
| 0.3059666204788281 | 0.6289564485590944 | 0.8101007666038603 | T | T | T |
| 0.2688748562275010 | 0.6715561997002898 | 0.0283914383536584 | T | T | T |
| 0.1150496196934462 | 0.6727918958517414 | 0.0114436524535927 | T | T | T |
| 0.0665621280880359 | 0.6292633943257879 | 0.7975017694499904 | T | T | T |
| 0.1861622335278417 | 0.6685818920046351 | 0.6703258305702682 | T | T | T |
| 0.0762075459948040 | 0.5563333900164869 | 0.1430662808764834 | T | T | T |
| 0.1958006887291091 | 0.5269297103826396 | 0.2888780232529935 | T | T | T |
| 0.2199811237821763 | 0.5619733141049835 | 0.5086856861631949 | T | T | T |
| 0.3794843801821536 | 0.5646540065905953 | 0.5108762067801592 | T | T | T |
| 0.4331615251808122 | 0.5279640234547557 | 0.2999291502553764 | T | T | T |
| 0.3218384240006271 | 0.5541068478855264 | 0.1536551531460778 | T | T | T |
| 0.0797902559086834 | 0.3255174548700567 | 0.1676769351590958 | T | T | T |
| 0.1974643973709752 | 0.3689061475016397 | 0.3075992772582890 | T | T | T |
| 0.2328904351407636 | 0.3276370737997716 | 0.5257582623985438 | T | T | T |
| 0.3878120790304785 | 0.3249872964809654 | 0.5127589652598170 | T | T | T |
| 0.4380696099798158 | 0.3701517506278098 | 0.3012350096706783 | T | T | T |
| 0.3199547047775327 | 0.3280132475946961 | 0.1736080718166707 | T | T | T |
| 0.3564361770107961 | 0.0600762613734009 | 0.7107710320091221 | T | T | T |
| 0.3039241121252838 | 0.0691749943770738 | 0.8915650641539933 | T | T | T |
| 0.1995694889766342 | 0.0537433471000872 | 0.0142951230728458 | T | T | T |
| 0.0971502174962388 | 0.0664806422426830 | 0.8883878689700964 | T | T | T |

**Structure files (CONTCAR) involved in this work:**

|                    |                     |                    |   |   |   |
|--------------------|---------------------|--------------------|---|---|---|
| 0.1036905872838842 | 0.0513007680494749  | 0.6919092910129341 | T | T | T |
| 0.2292561517365553 | 0.0296090813493678  | 0.7393823721500834 | T | T | T |
| 0.3605748689870889 | 0.8280329027085612  | 0.7441785168595005 | T | T | T |
| 0.3069224090103050 | 0.8402864829288156  | 0.9207798680294207 | T | T | T |
| 0.1906853890625475 | 0.8524618665243384  | 0.0134746938155088 | T | T | T |
| 0.0878524080164927 | 0.8275360691071131  | 0.8948896888191651 | T | T | T |
| 0.1094990442801540 | 0.8397306623456346  | 0.6984779473484409 | T | T | T |
| 0.2322204243224561 | 0.8586597890119306  | 0.7587578879431519 | T | T | T |
| 0.3238408165336540 | 0.9489704388873488  | 0.8087969280060368 | T | T | T |
| 0.0770503597178519 | 0.9461448228757837  | 0.8101877177921084 | T | T | T |
| 0.4307713261786344 | 0.1227695436397343  | 0.5770515288621614 | T | T | T |
| 0.4187920983632830 | 0.9909277034609907  | 0.5642782303923637 | T | T | T |
| 0.3958140590451448 | 0.8593013956176812  | 0.5586494111769325 | T | T | T |
| 0.1965925954932644 | 0.1261500065372088  | 0.6089125161092769 | T | T | T |
| 0.1833962181799384 | -0.0029543700863472 | 0.5583568240949845 | T | T | T |
| 0.2031890225689549 | 0.8634825399250303  | 0.5628985880228569 | T | T | T |
| 0.9880030885241264 | 0.0432810119517297  | 0.7782793744678915 | T | T | T |
| 0.9891733943218225 | 0.8478792352663824  | 0.7677322648232727 | T | T | T |
| 0.1422753903627191 | 0.9388385854555442  | 0.2126139966099437 | T | T | T |
| 0.1948831508020325 | 0.9279164692383022  | 0.3917541619514271 | T | T | T |
| 0.3004589027070147 | 0.9472463997493711  | 0.5107831727774348 | T | T | T |
| 0.4044211569471526 | 0.9262321884469087  | 0.3909037644085455 | T | T | T |
| 0.3959117784617843 | 0.9470578013767312  | 0.1942970305931104 | T | T | T |
| 0.2700979664411471 | 0.9692131702165693  | 0.2406645792490704 | T | T | T |
| 0.1441277415326436 | 0.1679031363807058  | 0.2354581937876415 | T | T | T |
| 0.1929683943072044 | 0.1610222510763919  | 0.4166048348259964 | T | T | T |
| 0.3088715173349086 | 0.1472592766689182  | 0.5091310057688183 | T | T | T |
| 0.4136736049691606 | 0.1713426775663841  | 0.3933697361353627 | T | T | T |
| 0.3953599988171957 | 0.1529725669953520  | 0.1989110975177972 | T | T | T |
| 0.2713814830511090 | 0.1379858767550233  | 0.2590650284015693 | T | T | T |
| 0.1770156214862309 | 0.0495198332200731  | 0.3115669163047389 | T | T | T |
| 0.4187057200889808 | 0.0484157724099685  | 0.3199865302621460 | T | T | T |
| 0.0678999431516992 | 0.8734584984102123  | 0.0803257278212118 | T | T | T |
| 0.0818010099931568 | 0.0049536471435708  | 0.0625123982644260 | T | T | T |
| 0.0985877262683408 | 0.1369116679190576  | 0.0540574801033217 | T | T | T |
| 0.3030261216591660 | 0.8717780744743373  | 0.1135536452305731 | T | T | T |
| 0.3156860666070087 | 0.9998699408848010  | 0.0587384716619937 | T | T | T |
| 0.3003056074903561 | 0.1338332562683626  | 0.0631992217606283 | T | T | T |
| 0.5117061910040936 | 0.9553091737696513  | 0.2796293003422904 | T | T | T |
| 0.5151787319406740 | 0.1351211634500349  | 0.2766310509694886 | T | T | T |
| 0.6419901329223401 | 0.5647347376009469  | 0.2874797180317634 | T | T | T |
| 0.6971435408731590 | 0.5573582050130647  | 0.1103692126585908 | T | T | T |
| 0.7971869129844444 | 0.5484689373297342  | 0.9775868914067867 | T | T | T |
| 0.8968037394953178 | 0.5666424567990789  | 0.1080190605251659 | T | T | T |
| 0.8969286153156819 | 0.5533571432204153  | 0.3054430023205821 | T | T | T |
| 0.7704619577904642 | 0.5298411863744561  | 0.2679804601283161 | T | T | T |
| 0.6430662872093272 | 0.3210931733000108  | 0.2553921034958919 | T | T | T |
| 0.6940972473333733 | 0.3506247368008553  | 0.0817372148496933 | T | T | T |
| 0.8096868260212484 | 0.3547587844867255  | 0.9905216323731686 | T | T | T |
| 0.9108735497280385 | 0.3256267153286991  | 0.1141437298163926 | T | T | T |
| 0.8969391308403452 | 0.3450129107757399  | 0.3079422507447093 | T | T | T |
| 0.7721244974659224 | 0.3534667596509217  | 0.2433774418473111 | T | T | T |
| 0.6756398917225545 | 0.4453197876023882  | 0.2162666603331790 | T | T | T |

**Structure files (CONTCAR) involved in this work:**

|                    |                    |                    |   |   |   |
|--------------------|--------------------|--------------------|---|---|---|
| 0.9188869420063175 | 0.4482839209411006 | 0.1860376703417163 | T | T | T |
| 0.5622631722148482 | 0.6233576645789451 | 0.4214497011346942 | T | T | T |
| 0.5844945104804035 | 0.4929143504377195 | 0.4346906024521209 | T | T | T |
| 0.6064141031324397 | 0.3615042552128153 | 0.4350497655158896 | T | T | T |
| 0.8064180707560029 | 0.6276990380119084 | 0.3925114249685810 | T | T | T |
| 0.8204265549365670 | 0.4990881434823488 | 0.4464361367754302 | T | T | T |
| 0.7995946758889120 | 0.3663695230274667 | 0.4386122138761416 | T | T | T |
| 0.0099515406451846 | 0.5456771220337061 | 0.2112129502978935 | T | T | T |
| 0.0165210036579482 | 0.3612010103474109 | 0.2237914147128259 | T | T | T |
| 0.8605645055097663 | 0.4316367369570796 | 0.7919446211170117 | T | T | T |
| 0.8087571809688491 | 0.4284174148855152 | 0.6106679577945981 | T | T | T |
| 0.7020749413547427 | 0.4484381281514722 | 0.4917429561321843 | T | T | T |
| 0.5953441886791658 | 0.4244069417636864 | 0.6047010673504731 | T | T | T |
| 0.6045794425782161 | 0.4371157592599575 | 0.8013049698015335 | T | T | T |
| 0.7316906914247271 | 0.4602071729606518 | 0.7615748480093112 | T | T | T |
| 0.8505684041385239 | 0.6734740815975534 | 0.7535381538179786 | T | T | T |
| 0.7904309207702700 | 0.6426866056343579 | 0.5860352532718266 | T | T | T |
| 0.6862958024961607 | 0.6481523544459609 | 0.4681735242744386 | T | T | T |
| 0.5925319398533937 | 0.6661489662780634 | 0.6062594152215023 | T | T | T |
| 0.6007941039090517 | 0.6503568451914862 | 0.8026842015235488 | T | T | T |
| 0.7263248600877437 | 0.6257212142050047 | 0.7578665011468396 | T | T | T |
| 0.8260698787907856 | 0.5457313840757604 | 0.7070925705238181 | T | T | T |
| 0.5835574769338053 | 0.5444540547620554 | 0.6848213648085417 | T | T | T |
| 0.9340868672257242 | 0.3841995682820482 | 0.9394466891439570 | T | T | T |
| 0.9188523174687468 | 0.5160231845160269 | 0.9245869962354040 | T | T | T |
| 0.8910082852924969 | 0.6442247255717071 | 0.9499174440127165 | T | T | T |
| 0.6971536421447160 | 0.3615364220488720 | 0.8856681896187708 | T | T | T |
| 0.6815602625354995 | 0.4889923150760858 | 0.9408533663722530 | T | T | T |
| 0.6870944231513352 | 0.6239633854424649 | 0.9487207063890202 | T | T | T |
| 0.4884686565293090 | 0.4525783699350113 | 0.7177364586836205 | T | T | T |
| 0.4848967967314746 | 0.6318978926895782 | 0.7121175375654990 | T | T | T |
| 0.6404320388152659 | 0.9300399357388469 | 0.2646658989437897 | T | T | T |
| 0.6856862305317702 | 0.9572207957291775 | 0.0822958338433724 | T | T | T |
| 0.8000075294892579 | 0.9631249283526502 | 0.9799198231480989 | T | T | T |
| 0.9066914761318959 | 0.9326976112232545 | 0.0908267028811953 | T | T | T |
| 0.8940352161116399 | 0.9344104808274161 | 0.2879774447561285 | T | T | T |
| 0.7699795286405567 | 0.9476259396104049 | 0.2304107587630425 | T | T | T |
| 0.6380098179608348 | 0.1737511703199460 | 0.2371933451754314 | T | T | T |
| 0.6984413495445078 | 0.1355535775127049 | 0.0701771680932061 | T | T | T |
| 0.8164679854251070 | 0.1482304882505938 | 0.9791153421801332 | T | T | T |
| 0.9253661589305395 | 0.1633229772245433 | 0.0851253469998143 | T | T | T |
| 0.8974078941746808 | 0.1642421745474981 | 0.2802927778544723 | T | T | T |
| 0.7704447745879253 | 0.1546066562486487 | 0.2303638996237189 | T | T | T |
| 0.6860414611832010 | 0.0513917991870026 | 0.2246633284735947 | T | T | T |
| 0.9154503029441059 | 0.0484600819303751 | 0.1880156308905500 | T | T | T |
| 0.5677398870096086 | 0.8720934362690173 | 0.4084472840240019 | T | T | T |
| 0.5936359487323281 | 0.0012110414638943 | 0.4188763232305950 | T | T | T |
| 0.6085397443177168 | 0.1334651152076099 | 0.4216375720321233 | T | T | T |
| 0.8014360552441654 | 0.8589595571637061 | 0.3704603250393206 | T | T | T |
| 0.8062032263819212 | 0.9899514766185488 | 0.4124015436394862 | T | T | T |
| 0.8082583906364810 | 0.1236740001490467 | 0.4164179158779466 | T | T | T |
| 0.0112207082658205 | 0.9547227259660267 | 0.2109091708949925 | T | T | T |
| 0.0182055819982993 | 0.1318958414803125 | 0.2149413496223493 | T | T | T |

**Structure files (CONTCAR) involved in this work:**

|                    |                     |                    |   |   |   |
|--------------------|---------------------|--------------------|---|---|---|
| 0.8587789940929034 | 0.0668263532165131  | 0.7717239929008285 | T | T | T |
| 0.8216506427092254 | 0.0554513554535264  | 0.5825420664516319 | T | T | T |
| 0.7045067875645407 | 0.0553868222752313  | 0.4905050631330030 | T | T | T |
| 0.5891036853778427 | 0.0683396810636641  | 0.5880711750395143 | T | T | T |
| 0.6064260151548838 | 0.0701176147148529  | 0.7832701576909328 | T | T | T |
| 0.7313284647881581 | 0.0508695903180984  | 0.7254819382461550 | T | T | T |
| 0.8617499504194088 | 0.8283772724576677  | 0.7389122684390137 | T | T | T |
| 0.8066250662304716 | 0.8566285385873162  | 0.5666947641660965 | T | T | T |
| 0.6892841435677427 | 0.8472124863316922  | 0.4747730181607823 | T | T | T |
| 0.5868184411260255 | 0.8355138817721337  | 0.5996166347648484 | T | T | T |
| 0.5988635415382931 | 0.8422915583126004  | 0.7990576922961848 | T | T | T |
| 0.7305803178685424 | 0.8489661679387431  | 0.7301770763719824 | T | T | T |
| 0.8178490519686153 | 0.9497914830806948  | 0.7063048206513842 | T | T | T |
| 0.5844508707547826 | 0.9537369323287344  | 0.6885598927941619 | T | T | T |
| 0.9350343415710761 | 0.1423020094952845  | 0.8870776728969884 | T | T | T |
| 0.9152494607834494 | 0.0199062610407982  | 0.9421713054007366 | T | T | T |
| 0.9041920681964767 | 0.8927805663443008  | 0.9027194795041434 | T | T | T |
| 0.7040910402900912 | 0.1328682004038854  | 0.8756701876368962 | T | T | T |
| 0.6865973847127637 | -0.0010324413469067 | 0.8959939065509263 | T | T | T |
| 0.7077509952314144 | 0.8689314298529959  | 0.9411121029286745 | T | T | T |
| 0.4876517495965589 | 0.0454060653685329  | 0.7122651933941924 | T | T | T |
| 0.4832360090306036 | 0.8688477712423596  | 0.7096485837889369 | T | T | T |
| 0.3575028720602049 | 0.4367065440008962  | 0.7195335552388076 | T | T | T |
| 0.3010232675436926 | 0.4303715470216520  | 0.8971462084891307 | T | T | T |
| 0.2009277627014217 | 0.4437876228177933  | 0.0290418083302796 | T | T | T |
| 0.1037454058419503 | 0.4297370031578672  | 0.8940726209908605 | T | T | T |
| 0.1047597186307631 | 0.4439296218271677  | 0.6973117013483617 | T | T | T |
| 0.2303169188861790 | 0.4704758609418795  | 0.7410154440116387 | T | T | T |
| 0.3615706635958573 | 0.6701986049952698  | 0.7477296220947198 | T | T | T |
| 0.3056779345074174 | 0.6591379959030104  | 0.9222355989530151 | T | T | T |
| 0.1916670856326843 | 0.6461226394202986  | 0.0219440301216307 | T | T | T |
| 0.0929924639242660 | 0.6699517383462107  | 0.8957714177880380 | T | T | T |
| 0.1087341785950228 | 0.6559670486777159  | 0.7007237064442937 | T | T | T |
| 0.2328665712104408 | 0.6379071253025745  | 0.7591459949124091 | T | T | T |
| 0.3253520148318033 | 0.5495728366451855  | 0.8130042467475144 | T | T | T |
| 0.0821654142143673 | 0.5496877148772447  | 0.8155790955890065 | T | T | T |
| 0.4312785884716055 | 0.3725190674144235  | 0.5865713219845771 | T | T | T |
| 0.4178592144978097 | 0.5046080361531196  | 0.5700846888218568 | T | T | T |
| 0.3960517010452081 | 0.6364344944160307  | 0.5629435969121641 | T | T | T |
| 0.1993353138793225 | 0.3707014642133691  | 0.6152435771159340 | T | T | T |
| 0.1826845355806555 | 0.4980966096699390  | 0.5597829023269048 | T | T | T |
| 0.2021157065241972 | 0.6318699843669390  | 0.5645813315695855 | T | T | T |
| 0.9913996320465547 | 0.4518001114845960  | 0.7915985102474570 | T | T | T |
| 0.9888301243692050 | 0.6434999047263416  | 0.7811211533688005 | T | T | T |
| 0.1411582154696805 | 0.5606471874616051  | 0.2148341297566397 | T | T | T |
| 0.1944234253760189 | 0.5675605573347889  | 0.3939309241964737 | T | T | T |
| 0.3000582357847679 | 0.5488425426807834  | 0.5137659106590600 | T | T | T |
| 0.4052342714681217 | 0.5687475075551451  | 0.3963272976490542 | T | T | T |
| 0.3969980944606293 | 0.5538864483111023  | 0.1987920543398929 | T | T | T |
| 0.2701696075744661 | 0.5324689584147989  | 0.2415717416471573 | T | T | T |
| 0.1436917545533851 | 0.3273165825856781  | 0.2417775683945964 | T | T | T |
| 0.1939418762851910 | 0.3412626518900215  | 0.4212413934519472 | T | T | T |
| 0.3105158326382331 | 0.3505134526710529  | 0.5123524867400727 | T | T | T |

**Structure files (CONTCAR) involved in this work:**

|                    |                    |                    |   |   |   |
|--------------------|--------------------|--------------------|---|---|---|
| 0.4175898258310011 | 0.3284322056938022 | 0.4004732858751617 | T | T | T |
| 0.3976903960942752 | 0.3399381491423761 | 0.2056109667168367 | T | T | T |
| 0.2721614691908951 | 0.3576459249347761 | 0.2621825927833464 | T | T | T |
| 0.1777963920383900 | 0.4481096418330745 | 0.3056972077289577 | T | T | T |
| 0.4186455891239700 | 0.4485111801476416 | 0.3173542104544493 | T | T | T |
| 0.0673071412044612 | 0.6262018155765726 | 0.0814074382028991 | T | T | T |
| 0.0815732695789811 | 0.4948418841795386 | 0.0637416798679462 | T | T | T |
| 0.0972891766353509 | 0.3629147776928264 | 0.0629542737381885 | T | T | T |
| 0.3064968504466485 | 0.6296601292053394 | 0.1153501801051766 | T | T | T |
| 0.3176325243966362 | 0.5007981347445071 | 0.0617809174316634 | T | T | T |
| 0.3053505082474665 | 0.3663742484093037 | 0.0686987497035788 | T | T | T |
| 0.5126171808477825 | 0.5414917250320798 | 0.2849391578496188 | T | T | T |
| 0.5181906511517266 | 0.3627949528637425 | 0.2829957940258140 | T | T | T |
| 0.4414184436272382 | 0.7490981599917650 | 0.6418178301631576 | T | T | T |
| 0.2021995430460589 | 0.7477651276650343 | 0.6557652332621758 | T | T | T |
| 0.2721108458539320 | 0.7503117286881580 | 0.0578687481111643 | T | T | T |
| 0.1082244768449252 | 0.7496417664668896 | 0.0512404612000171 | T | T | T |
| 0.0608328237711921 | 0.2485651322684094 | 0.1409553498907280 | T | T | T |
| 0.3054759553785201 | 0.2486946916055635 | 0.1577510917338927 | T | T | T |
| 0.2273606434374461 | 0.2490128130173576 | 0.5562462137467123 | T | T | T |
| 0.3924493458318601 | 0.2479177106399889 | 0.5515240722232366 | T | T | T |
| 0.5611984581977792 | 0.2472491348469978 | 0.3591260322981805 | T | T | T |
| 0.8091820322511332 | 0.2489803956704886 | 0.3571136346020587 | T | T | T |
| 0.7290171480491987 | 0.2470725580160374 | 0.9686788811004736 | T | T | T |
| 0.8942847074265027 | 0.2567588003191620 | 0.9498735193370023 | T | T | T |
| 0.9216102835564672 | 0.7610572226810558 | 0.8832352488400759 | T | T | T |
| 0.6939547316675310 | 0.7399992550973539 | 0.8622829282434734 | T | T | T |
| 0.7770132665926113 | 0.7463938115837501 | 0.4618321635632127 | T | T | T |
| 0.5992931146184499 | 0.7488382568014060 | 0.4521164623037755 | T | T | T |
| 0.7860526478278667 | 0.6972058800413753 | 0.0781954056498647 | T | T | T |
| 0.6698117912854592 | 0.7669812841811641 | 0.1246201912607460 | T | T | T |
| 0.8282231476993079 | 0.8205051089709008 | 0.0399717739294236 | T | T | T |
| 0.9183325818680990 | 0.6780278526759880 | 0.8309414379803487 | T | T | T |
| 0.6810985840613004 | 0.8249846329648860 | 0.8301248642909479 | T | T | T |
| 0.6871032889503890 | 0.6921235480373834 | 0.0575707434839571 | T | T | T |
| 0.7355281332233106 | 0.8131182360046907 | 0.0659435347550457 | T | T | T |
| 0.8575128718496502 | 0.7326173766469524 | 0.9966032031400601 | T | T | T |
| 0.8052557872444858 | 0.6890404052657308 | 0.1816948966676366 | T | T | T |
| 0.8024336326420758 | 0.6359235830364983 | 0.2014780914808876 | T | T | T |
| 0.8554868515850028 | 0.8367788472266091 | 0.0957970957254741 | T | T | T |
| 0.7725549723112107 | 0.7190622370399541 | 0.2302615674696290 | T | T | T |
| 0.8571751629845870 | 0.7057849318859686 | 0.1925489232699904 | T | T | T |

**Figure S7 IS**

Si Al O Zn H C

1.0000000000000000

20.0219999999999985 0.0000000000000000 0.0000000000000000

0.0000000000000000 19.8990000000000009 0.0000000000000000

0.0000000000000000 0.0000000000000000 13.3829999999999991

94 2 192 1 4 1

Selective dynamics

Direct

0.2672864914172786 0.8305765348550681 0.0252984628691927 T T T

0.3032414515251736 0.8708222016185171 0.8070377401990101 T T T

**Structure files (CONTCAR) involved in this work:**

|                    |                    |                    |   |   |   |
|--------------------|--------------------|--------------------|---|---|---|
| 0.9403878215489508 | 0.3764418089030842 | 0.1875623915810386 | T | T | T |
| 0.8845390969317602 | 0.3253360092615060 | 0.9906629607618088 | T | T | T |
| 0.7300858986969530 | 0.3259548905941331 | 0.9738867314982400 | T | T | T |
| 0.6928842394974486 | 0.3712615749806225 | 0.1864304399659497 | T | T | T |
| 0.5749112527485208 | 0.3288240532517340 | 0.3303676483625494 | T | T | T |
| 0.8118736281184681 | 0.5540786552419451 | 0.3367187015488080 | T | T | T |
| 0.9292678705935761 | 0.5304680121297517 | 0.1880409127074907 | T | T | T |
| 0.8743919407586723 | 0.5728981636687013 | 0.9855730495397955 | T | T | T |
| 0.7139745638988022 | 0.5673326100612226 | 0.9834682577089647 | T | T | T |
| 0.6900044050593092 | 0.5265372920226233 | 0.1985875844595339 | T | T | T |
| 0.4194989232193601 | 0.8271294156102524 | 0.6688500066577001 | T | T | T |
| 0.5751399718869854 | 0.5557043235908785 | 0.3530497925686141 | T | T | T |
| 0.1812049357215470 | 0.0618421332313605 | 0.6666294284635540 | T | T | T |
| 0.0677520147561329 | 0.0310219218671451 | 0.8022791989403892 | T | T | T |
| 0.3174650630410257 | 0.1723282551232476 | 0.1724314663976133 | T | T | T |
| 0.4357776073034109 | 0.1277626704466576 | 0.2983040497634440 | T | T | T |
| 0.3872626902838867 | 0.1740414052623095 | 0.5115451446276241 | T | T | T |
| 0.2323376221617760 | 0.1706662148473498 | 0.5251465496459309 | T | T | T |
| 0.1965662928338476 | 0.1300045909917377 | 0.3079042317291873 | T | T | T |
| 0.0812461893241840 | 0.1728302272604626 | 0.1685439742210966 | T | T | T |
| 0.3196311845144914 | 0.9387871932062529 | 0.1663970345425826 | T | T | T |
| 0.1220681428832018 | 0.0647939744550611 | 0.0134339685199886 | T | T | T |
| 0.4341097374827175 | 0.9694096425970592 | 0.3016715323528076 | T | T | T |
| 0.3785341609918014 | 0.9360954850549349 | 0.5136024409716182 | T | T | T |
| 0.2184583398989051 | 0.9414594358120280 | 0.5186180366754157 | T | T | T |
| 0.1949576281043445 | 0.9705879512760915 | 0.2956597251589019 | T | T | T |
| 0.0776217490867915 | 0.9417376325153213 | 0.1504995019253253 | T | T | T |
| 0.2817545785915488 | 0.0590044418237362 | 0.0188424208331623 | T | T | T |
| 0.3151163840703689 | 0.3302525770814342 | 0.1701086517988810 | T | T | T |
| 0.1912777812495238 | 0.5293636346534497 | 0.2928526691736035 | T | T | T |
| 0.2160465840982700 | 0.5583419544909289 | 0.5156855215364433 | T | T | T |
| 0.3745094170705290 | 0.5654023422490220 | 0.5134596324112091 | T | T | T |
| 0.4300489273078500 | 0.5309987775705610 | 0.3033822270562543 | T | T | T |
| 0.3177870790107008 | 0.5606399965127445 | 0.1629521086420973 | T | T | T |
| 0.0841221145828434 | 0.3257345069977604 | 0.1656175039011340 | T | T | T |
| 0.1951411751568509 | 0.3709543431713379 | 0.3081537298500150 | T | T | T |
| 0.2310793475209003 | 0.3311152581685374 | 0.5262265873998039 | T | T | T |
| 0.3855681804950736 | 0.3281504064450823 | 0.5103234164974443 | T | T | T |
| 0.4317024036515762 | 0.3738155426654447 | 0.2974635271207914 | T | T | T |
| 0.0739750154455695 | 0.5590423302348548 | 0.1476995569489198 | T | T | T |
| 0.1772700415331327 | 0.4407566509189151 | 0.6641593691115827 | T | T | T |
| 0.4163776370980420 | 0.6735833718707974 | 0.6655068449460686 | T | T | T |
| 0.3036220328534867 | 0.6297015256664388 | 0.8071568358750016 | T | T | T |
| 0.2664972494693075 | 0.6701164929607236 | 0.0248869087242337 | T | T | T |
| 0.1123869512798662 | 0.6735317279843839 | 0.0099097599227739 | T | T | T |
| 0.0632643643895285 | 0.6280235830520219 | 0.7984069578494817 | T | T | T |
| 0.1818569520863669 | 0.6705656215964159 | 0.6705457744405785 | T | T | T |
| 0.4211859319141900 | 0.4428748746542586 | 0.6483482010503675 | T | T | T |
| 0.3037456746375822 | 0.4709907354093154 | 0.7923203284405609 | T | T | T |
| 0.2796633213738559 | 0.4426830260815505 | 0.0153703803745697 | T | T | T |
| 0.1214539214114845 | 0.4360722709549270 | 0.0142165137193178 | T | T | T |
| 0.0638022857916086 | 0.4695123497721819 | 0.8047503277283181 | T | T | T |
| 0.3055545567076736 | 0.0303399423625197 | 0.7961867573173915 | T | T | T |



**Structure files (CONTCAR) involved in this work:**

|                    |                    |                    |   |   |   |
|--------------------|--------------------|--------------------|---|---|---|
| 0.6138324912663520 | 0.8269259055809546 | 0.4885945095101917 | T | T | T |
| 0.5642494320492483 | 0.8742744909758017 | 0.6975831989260969 | T | T | T |
| 0.6812698797891039 | 0.8315774545575763 | 0.8290759874190626 | T | T | T |
| 0.9229170711274582 | 0.0530329969230358 | 0.8555690572760413 | T | T | T |
| 0.8029817996957599 | 0.0242957302581715 | 0.7066374146774012 | T | T | T |
| 0.7806663813289658 | 0.0658274795082734 | 0.4907362875164542 | T | T | T |
| 0.6203938978556126 | 0.0696776340494183 | 0.4900812563812000 | T | T | T |
| 0.5673556878040380 | 0.0316712351982472 | 0.6987196454805686 | T | T | T |
| 0.6799530717845592 | 0.0519673965429137 | 0.8457344417075136 | T | T | T |
| 0.9231210328424636 | 0.8295747711792294 | 0.8332826089531443 | T | T | T |
| 0.8042251924122330 | 0.8669321917652186 | 0.6886283156169162 | T | T | T |
| 0.7681140614457801 | 0.8268131811332348 | 0.4714518238564138 | T | T | T |
| 0.8802115181764782 | 0.9328686350206862 | 0.9940263747637376 | T | T | T |
| 0.9330249237507611 | 0.9683297610019708 | 0.2021954401233240 | T | T | T |
| 0.8210690881033001 | 0.9476381171487899 | 0.3493391429105203 | T | T | T |
| 0.5788517696250994 | 0.1739540933533320 | 0.3292670004854950 | T | T | T |
| 0.6965581799670455 | 0.1307860775919475 | 0.1903757590911974 | T | T | T |
| 0.7327549314557622 | 0.1697989806849448 | 0.9705969016053974 | T | T | T |
| 0.8875263330358528 | 0.1723421082852299 | 0.9846465180364835 | T | T | T |
| 0.9368924184284303 | 0.1252384929865046 | 0.1957313940601451 | T | T | T |
| 0.8201208331034009 | 0.1697122260218397 | 0.3266303840441834 | T | T | T |
| 0.5780913045844993 | 0.9453802313347460 | 0.3569554117411921 | T | T | T |
| 0.6970562474335034 | 0.9733299371427059 | 0.2112911899473671 | T | T | T |
| 0.7203176148106099 | 0.9367880952502345 | 0.9914469656897485 | T | T | T |
| 0.1815179841772757 | 0.8285771372468602 | 0.6715704454771780 | T | T | T |
| 0.0659156501123775 | 0.8744176285233243 | 0.8000949830395186 | T | T | T |
| 0.7689029896694382 | 0.6712300986157330 | 0.4613850108444799 | T | T | T |
| 0.6140814640285486 | 0.6728809374904333 | 0.4800070350787921 | T | T | T |
| 0.5625625776852312 | 0.6273060460771329 | 0.6935377358482381 | T | T | T |
| 0.6758887356930136 | 0.6731589056244897 | 0.8200546483047090 | T | T | T |
| 0.1126231184524109 | 0.8273015323070139 | 0.0127841035014776 | T | T | T |
| 0.9186647846315756 | 0.4449575079679963 | 0.8599651412340659 | T | T | T |
| 0.8025983330048460 | 0.4759461789462247 | 0.7174054960769926 | T | T | T |
| 0.7756527690751275 | 0.4392668654729820 | 0.4954400311361752 | T | T | T |
| 0.6154818083121624 | 0.4324052736961459 | 0.4915237294188916 | T | T | T |
| 0.5658835014449419 | 0.4690539023877051 | 0.7039302030303626 | T | T | T |
| 0.6773180968348630 | 0.4451150069761030 | 0.8488288871014699 | T | T | T |
| 0.9202989314000017 | 0.6781885091296749 | 0.8289651857597538 | T | T | T |
| 0.4224347591743620 | 0.0597077721108704 | 0.6502243218380974 | T | T | T |
| 0.8182253201083534 | 0.3328628132166874 | 0.3226978715471040 | T | T | T |
| 0.8032757945986196 | 0.6349200122154631 | 0.6864000090021567 | T | T | T |
| 0.8088995581537880 | 0.5068391634666481 | 0.4386009155951114 | T | T | T |
| 0.8027172849125186 | 0.6316417373252375 | 0.3635741559152528 | T | T | T |
| 0.5913198609248300 | 0.3639055470936119 | 0.4375706444839856 | T | T | T |
| 0.5827151169309535 | 0.4978239676314417 | 0.4386293937418787 | T | T | T |
| 0.5666332080184607 | 0.6280735415245073 | 0.4068498917904589 | T | T | T |
| 0.9261473534280248 | 0.4530250642303700 | 0.1510925916370001 | T | T | T |
| 0.6703640532921242 | 0.4497717439094795 | 0.1723121689270063 | T | T | T |
| 0.7661054064510303 | 0.3670704956629741 | 0.2349728937665930 | T | T | T |
| 0.9020253259243144 | 0.3671547566294520 | 0.2959888708561532 | T | T | T |
| 0.9107010756042817 | 0.3243399868865817 | 0.1069972327641142 | T | T | T |
| 0.8074259985954412 | 0.3504081168533774 | 0.9892810626487695 | T | T | T |
| 0.6897551252728376 | 0.3346591649012867 | 0.0779878966623835 | T | T | T |

**Structure files (CONTCAR) involved in this work:**

|                    |                    |                    |   |   |   |
|--------------------|--------------------|--------------------|---|---|---|
| 0.6385632823251257 | 0.3339061253842700 | 0.2572090424740912 | T | T | T |
| 0.7649841560013495 | 0.5267897014408642 | 0.2486406752556259 | T | T | T |
| 0.8902014692058984 | 0.5326761139472420 | 0.3001446593469224 | T | T | T |
| 0.8933098809254049 | 0.5770268238754511 | 0.1059631577652355 | T | T | T |
| 0.7949188237315847 | 0.5613081547706229 | 0.9762914599172421 | T | T | T |
| 0.6912489385555117 | 0.5736453739807361 | 0.1002210422742899 | T | T | T |
| 0.6396286639208556 | 0.5576698400883622 | 0.2803981677819617 | T | T | T |
| 0.5155535882184873 | 0.1351695605845293 | 0.2785228170947588 | T | T | T |
| 0.5134586879245218 | 0.9570437153087193 | 0.2856159574672515 | T | T | T |
| 0.2993408569536847 | 0.1299168878788529 | 0.0726077799966623 | T | T | T |
| 0.3112629940618936 | 0.9962010772499811 | 0.0815495731621752 | T | T | T |
| 0.3023794067318274 | 0.8652427290092959 | 0.1212324154145286 | T | T | T |
| 0.1074657286607174 | 0.1360415324475570 | 0.0680233521841678 | T | T | T |
| 0.0856722463751804 | 0.0045067551563486 | 0.0738993827295123 | T | T | T |
| 0.0671724671208443 | 0.8733207251779342 | 0.0859985042308396 | T | T | T |
| 0.4165596557697804 | 0.0490688311810311 | 0.3116923581051674 | T | T | T |
| 0.1812706458232823 | 0.0510429043777763 | 0.2886698650116781 | T | T | T |
| 0.2704439445626441 | 0.1495682519339496 | 0.2661708136486460 | T | T | T |
| 0.3950030746932104 | 0.1595344298374912 | 0.2039161025100310 | T | T | T |
| 0.4155472380236624 | 0.1689436741879094 | 0.3985738992223225 | T | T | T |
| 0.3100588435202359 | 0.1481003944614615 | 0.5143300137165294 | T | T | T |
| 0.1922638319127238 | 0.1471427963614055 | 0.4258488782115433 | T | T | T |
| 0.1401157506752023 | 0.1741554787140911 | 0.2515666341219238 | T | T | T |
| 0.2710768155776158 | 0.9546190834965071 | 0.2611514149263643 | T | T | T |
| 0.3963659407507304 | 0.9382323263447384 | 0.2048561278837180 | T | T | T |
| 0.4084823897927061 | 0.9314317198761830 | 0.4017701514973440 | T | T | T |
| 0.2987392219318482 | 0.9492200194946326 | 0.5100233648097993 | T | T | T |
| 0.1845938373314784 | 0.9430452082713350 | 0.4084753084408298 | T | T | T |
| 0.1426014146229825 | 0.9331390539538665 | 0.2219534098856848 | T | T | T |
| 0.9857351300833379 | 0.8706135905835675 | 0.7837665424373738 | T | T | T |
| 0.9879652598401550 | 0.0398211834394233 | 0.7858298720948346 | T | T | T |
| 0.1994772781883508 | 0.8705497051467963 | 0.5712064958482808 | T | T | T |
| 0.1894770441277633 | 0.0044275854829968 | 0.5817837686505117 | T | T | T |
| 0.1988581155936592 | 0.1353671587570545 | 0.6216969306253722 | T | T | T |
| 0.3947278893945609 | 0.8654552560528822 | 0.5684700452115508 | T | T | T |
| 0.6076796042872018 | 0.7508802370221924 | 0.4460945691578472 | T | T | T |
| 0.7709384347941636 | 0.7502347954661742 | 0.4311019153702318 | T | T | T |
| 0.6865152105444186 | 0.7520459160072358 | 0.8478005687873611 | T | T | T |
| 0.9464728761757903 | 0.7535339464257276 | 0.8581985614544897 | T | T | T |
| 0.8925624345630316 | 0.2499841022307637 | 0.9466160881998672 | T | T | T |
| 0.7282320590913544 | 0.2481999976716356 | 0.9389755210478127 | T | T | T |
| 0.8144324650773672 | 0.2491107725471596 | 0.3410315197417722 | T | T | T |
| 0.5573371567251869 | 0.2509121299391472 | 0.3526036252863290 | T | T | T |
| 0.3910745119281964 | 0.2513744027582026 | 0.5495884124127673 | T | T | T |
| 0.4138249759867998 | 0.9974675378801499 | 0.5730638714698773 | T | T | T |
| 0.2259200322757967 | 0.2509435385075943 | 0.5404956501876639 | T | T | T |
| 0.3047443899018143 | 0.2510894015495745 | 0.1471433541911533 | T | T | T |
| 0.0626456138072820 | 0.2497841464604890 | 0.1380424419809703 | T | T | T |
| 0.1074795673623396 | 0.7499515801476089 | 0.0507544104270422 | T | T | T |
| 0.2720333032352462 | 0.7502022672570505 | 0.0390570879972408 | T | T | T |
| 0.1922525621014009 | 0.7495827198209588 | 0.6465538985317705 | T | T | T |
| 0.4362560408932344 | 0.7502009705016821 | 0.6375766299655865 | T | T | T |
| 0.5113932502573362 | 0.3661993762034366 | 0.2780526858664837 | T | T | T |

**Structure files (CONTCAR) involved in this work:**

|                    |                    |                    |   |   |   |
|--------------------|--------------------|--------------------|---|---|---|
| 0.5095628422520498 | 0.5402879489398793 | 0.2860331769740018 | T | T | T |
| 0.2942364257798796 | 0.3714713502656667 | 0.0701786274742471 | T | T | T |
| 0.4319404819530178 | 0.1285130326215738 | 0.5863376330493911 | T | T | T |
| 0.3133879295201243 | 0.5047787065426514 | 0.0749764621351933 | T | T | T |
| 0.3006546455406242 | 0.6349421389822569 | 0.1212190244650961 | T | T | T |
| 0.1127034949751254 | 0.3630028691023030 | 0.0666683893902431 | T | T | T |
| 0.0808999945820167 | 0.4927817342386650 | 0.0775213288221668 | T | T | T |
| 0.0656492221178605 | 0.6257299125227208 | 0.0795527740373094 | T | T | T |
| 0.4116782349956566 | 0.4518443666501775 | 0.3167186298792195 | T | T | T |
| 0.1751836088660758 | 0.4492013484273145 | 0.2895022924691175 | T | T | T |
| 0.2690571249012955 | 0.3541771639252509 | 0.2647138726278380 | T | T | T |
| 0.3925088334052046 | 0.3453990879409652 | 0.1995352192343317 | T | T | T |
| 0.4103449392976832 | 0.3304061217437670 | 0.3951138656975721 | T | T | T |
| 0.0885067293809362 | 0.9523217621669560 | 0.8141868069626654 | T | T | T |
| 0.3085794104308615 | 0.3547331097562588 | 0.5174335801410499 | T | T | T |
| 0.1915175343320212 | 0.3548076058975190 | 0.4262974517402406 | T | T | T |
| 0.1399259963243917 | 0.3245407381734138 | 0.2529715650189198 | T | T | T |
| 0.2667529892925350 | 0.5418446415738992 | 0.2536312076519018 | T | T | T |
| 0.3933295467079286 | 0.5616154615553641 | 0.2056279428618252 | T | T | T |
| 0.4050949880820751 | 0.5713092719008517 | 0.4019223310479706 | T | T | T |
| 0.2958182988044244 | 0.5454129899420447 | 0.5087392318068352 | T | T | T |
| 0.1832739637585084 | 0.5594342262684140 | 0.4046651049160173 | T | T | T |
| 0.1370329679606189 | 0.5672377573366850 | 0.2224041435228646 | T | T | T |
| 0.3186613877306856 | 0.9499290228176605 | 0.7887331801140742 | T | T | T |
| 0.2296467517610393 | 0.8511845101704182 | 0.7641060291105840 | T | T | T |
| 0.9840852831858065 | 0.6371022995490655 | 0.7804654429409186 | T | T | T |
| 0.9843299595164379 | 0.4559584511718963 | 0.7892518803531721 | T | T | T |
| 0.2006360765585179 | 0.6295555410347480 | 0.5693346904808319 | T | T | T |
| 0.1815570051237735 | 0.4964744805313705 | 0.5758025914796379 | T | T | T |
| 0.1953087066442480 | 0.3667266426779117 | 0.6213190269594746 | T | T | T |
| 0.3841110514666878 | 0.6377135837344107 | 0.5672601686956594 | T | T | T |
| 0.4136253507769075 | 0.5071351450598003 | 0.5744961990032892 | T | T | T |
| 0.4316407000263816 | 0.3757382335264593 | 0.5806194558117151 | T | T | T |
| 0.0804429140364382 | 0.5488411514747522 | 0.8169389604887206 | T | T | T |
| 0.1042719142792614 | 0.8423473851516601 | 0.7037815586566143 | T | T | T |
| 0.3204986250839027 | 0.5507459105426511 | 0.7891466538655063 | T | T | T |
| 0.2299089659854951 | 0.6473642358246742 | 0.7628106030639659 | T | T | T |
| 0.1047133978278716 | 0.6545779964176962 | 0.7010867414538721 | T | T | T |
| 0.0876117859625856 | 0.6706659285715337 | 0.8951934404916025 | T | T | T |
| 0.1888691950810526 | 0.6462356191737181 | 0.0173506211001397 | T | T | T |
| 0.3055830783636796 | 0.6460302880429809 | 0.9253130244649135 | T | T | T |
| 0.3606112693706847 | 0.6744661364935668 | 0.7536505683817039 | T | T | T |
| 0.2269993809753586 | 0.4596321158933376 | 0.7558371870565898 | T | T | T |
| 0.1005780169043905 | 0.4398702482914752 | 0.7052082888306916 | T | T | T |
| 0.0905999889874825 | 0.4300847101940155 | 0.9029625685642785 | T | T | T |
| 0.0866138550381911 | 0.8317545361278131 | 0.8986882871677734 | T | T | T |
| 0.1996568087291330 | 0.4565173115460254 | 0.0100973540586339 | T | T | T |
| 0.3112354567586788 | 0.4401010815034461 | 0.9038790927740408 | T | T | T |
| 0.3554855357681664 | 0.4327595757053649 | 0.7184083338823970 | T | T | T |
| 0.1895361124218972 | 0.8537213981936289 | 0.0181250285808303 | T | T | T |
| 0.4847984690196593 | 0.8630436757593849 | 0.7174864665204508 | T | T | T |
| 0.4886964986573940 | 0.0476802285534167 | 0.7171839060014888 | T | T | T |
| 0.6996139276244812 | 0.8683879165246625 | 0.9340257421162800 | T | T | T |

**Structure files (CONTCAR) involved in this work:**

|                    |                    |                    |   |   |   |
|--------------------|--------------------|--------------------|---|---|---|
| 0.6845475165220969 | 0.0019152605382953 | 0.9411854784949538 | T | T | T |
| 0.6983460419304158 | 0.1277046085737835 | 0.8808851545567080 | T | T | T |
| 0.3062663288391147 | 0.8541382733164347 | 0.9251788888130154 | T | T | T |
| 0.9001364620306272 | 0.8636435654506456 | 0.9382032542775963 | T | T | T |
| 0.9192776370239888 | 0.9956512017571899 | 0.9420760708442133 | T | T | T |
| 0.9312703650282474 | 0.1260165993347348 | 0.9094586363889375 | T | T | T |
| 0.5783229510981495 | 0.9527947476490747 | 0.6716518274031545 | T | T | T |
| 0.8197553505325937 | 0.9469891078438508 | 0.6778003643348481 | T | T | T |
| 0.7314205177493071 | 0.8562043350148603 | 0.7401489610139997 | T | T | T |
| 0.6053413507552932 | 0.8524638328944341 | 0.7969565730929050 | T | T | T |
| 0.5873917867533803 | 0.8285314085261438 | 0.6031802409022323 | T | T | T |
| 0.6911406622874269 | 0.8522594676752131 | 0.4847104343051433 | T | T | T |
| 0.8057580997503067 | 0.8329427733821433 | 0.5785312175397925 | T | T | T |
| 0.3601250927740592 | 0.8270973002877313 | 0.7513058349295658 | T | T | T |
| 0.8618349848705038 | 0.8322706791438931 | 0.7550709317981098 | T | T | T |
| 0.7291734330313476 | 0.0269053564263012 | 0.7567004876700448 | T | T | T |
| 0.6043954533758963 | 0.0518730923931137 | 0.8021771029197354 | T | T | T |
| 0.5967007048890312 | 0.0755451851589970 | 0.6057420977448231 | T | T | T |
| 0.7001331973448709 | 0.0568788110297998 | 0.4831269969493399 | T | T | T |
| 0.8040729243267366 | 0.0711094424344362 | 0.6068982248540796 | T | T | T |
| 0.8570298606931392 | 0.0534383070802714 | 0.7856381567817181 | T | T | T |
| 0.2293962870194941 | 0.0463706376842555 | 0.7617745959545117 | T | T | T |
| 0.0163899369030967 | 0.1358673878923616 | 0.2162248171887802 | T | T | T |
| 0.1043675200062234 | 0.0629520094281177 | 0.7049582155862864 | T | T | T |
| 0.0120301034321061 | 0.9534364732617142 | 0.2190796952220220 | T | T | T |
| 0.8031232810252875 | 0.1335474399086785 | 0.4328239705720898 | T | T | T |
| 0.8155730318468224 | 0.9999079688381046 | 0.4419055684512667 | T | T | T |
| 0.8046105947810407 | 0.8723773405784464 | 0.3874119178512793 | T | T | T |
| 0.6002985780400417 | 0.1394334503171220 | 0.4345802255592400 | T | T | T |
| 0.5824240584516546 | 0.0075470799930072 | 0.4355964908162139 | T | T | T |
| 0.5684831971598563 | 0.8759292365191204 | 0.4191740584545073 | T | T | T |
| 0.9211247219676195 | 0.0468455253358950 | 0.1740110827100774 | T | T | T |
| 0.6770287173012647 | 0.0515482086663309 | 0.1933786601677106 | T | T | T |
| 0.7701558939369818 | 0.1423540287877547 | 0.2385852653655064 | T | T | T |
| 0.0916346971813816 | 0.0707636315913379 | 0.9019901002257322 | T | T | T |
| 0.8963718231966714 | 0.1499676468565684 | 0.2938587205840112 | T | T | T |
| 0.9157688858306789 | 0.1687894513656782 | 0.0980109507107885 | T | T | T |
| 0.8104196429499515 | 0.1467731459642866 | 0.9828176715346596 | T | T | T |
| 0.6946631153554187 | 0.1569682547653435 | 0.0757530505365309 | T | T | T |
| 0.6409979867081201 | 0.1732145842879308 | 0.2518800323399369 | T | T | T |
| 0.7715510304703758 | 0.9698904120231940 | 0.2588119096061791 | T | T | T |
| 0.8968794035389164 | 0.9485938110697597 | 0.3063969931250191 | T | T | T |
| 0.9028508905462503 | 0.9246479702576001 | 0.1098994010622456 | T | T | T |
| 0.8007237925246133 | 0.9472900354323106 | 0.9857652570791501 | T | T | T |
| 0.6958360976915235 | 0.9318238623612384 | 0.1069028483964485 | T | T | T |
| 0.2015540858838863 | 0.0502471533683737 | 0.0094396260518912 | T | T | T |
| 0.6442285333136835 | 0.9394049715917288 | 0.2878248829890167 | T | T | T |
| 0.3158876309827706 | 0.0582377622208247 | 0.9089041144870554 | T | T | T |
| 0.4817307095099206 | 0.6331642889404938 | 0.7038411288876982 | T | T | T |
| 0.4865492096827559 | 0.4539417169688154 | 0.7176684792966294 | T | T | T |
| 0.6885804294412409 | 0.6329028556012987 | 0.9250681143797782 | T | T | T |
| 0.6817152120152306 | 0.4979134025587342 | 0.9410029702117059 | T | T | T |
| 0.6959647773196328 | 0.3700787986545434 | 0.8864472511896774 | T | T | T |

**Structure files (CONTCAR) involved in this work:**

|                    |                    |                    |   |   |   |
|--------------------|--------------------|--------------------|---|---|---|
| 0.9002469465752451 | 0.6416193505174030 | 0.9353974593234863 | T | T | T |
| 0.9121898796439837 | 0.5085285084023558 | 0.9358749215684643 | T | T | T |
| 0.3579557004764052 | 0.0679641645137686 | 0.7227618192414240 | T | T | T |
| 0.9302356610156267 | 0.3770710975085858 | 0.9263996680969071 | T | T | T |
| 0.5810768848293523 | 0.5479435480417896 | 0.6850816110550049 | T | T | T |
| 0.8267780353544142 | 0.5511493584898033 | 0.7055712055705645 | T | T | T |
| 0.7223467770630181 | 0.6485647658845132 | 0.7303893639779816 | T | T | T |
| 0.5968206875886545 | 0.6612842877859626 | 0.7908708939475748 | T | T | T |
| 0.5877830811656348 | 0.6656616036423540 | 0.5935862699782615 | T | T | T |
| 0.6906940264658771 | 0.6464588050777534 | 0.4678923719770653 | T | T | T |
| 0.8093137591619515 | 0.6527379111830397 | 0.5592521270655479 | T | T | T |
| 0.8598603147123770 | 0.6827105497727685 | 0.7533345860756875 | T | T | T |
| 0.7268035564815583 | 0.4681924573179432 | 0.7593153164535932 | T | T | T |
| 0.6015686904887313 | 0.4430812135829659 | 0.8054928698111845 | T | T | T |
| 0.5952191588859631 | 0.4278186653077899 | 0.6079488128495392 | T | T | T |
| 0.6966465515809757 | 0.4384444274927554 | 0.4797649213064522 | T | T | T |
| 0.8023483270845025 | 0.4372051809113945 | 0.6082277515021239 | T | T | T |
| 0.8538103344059549 | 0.4335947233848268 | 0.7893948809102479 | T | T | T |
| 0.0192816136982645 | 0.3665090362066909 | 0.2084627993694982 | T | T | T |
| 0.0054726252963266 | 0.5515972849610347 | 0.2142244289749846 | T | T | T |
| 0.8162807070719229 | 0.3801745836216334 | 0.4363681244679679 | T | T | T |
| 0.8962856921283112 | 0.4427938389592743 | 0.3908928847993571 | T | T | T |
| 0.9250739055951519 | 0.4385901580943235 | 0.5400729034773510 | T | T | T |
| 0.9980381260882756 | 0.4575172699324511 | 0.4541379407196626 | T | T | T |
| 0.9993557896981485 | 0.4685489751452894 | 0.5825987844305909 | T | T | T |
| 0.9493485375926797 | 0.5258475094952099 | 0.5123318703194161 | T | T | T |
| 0.9659643378651249 | 0.4734433378581671 | 0.5175059888693688 | T | T | T |

**Figure S7 TS**

Si Al O Zn H C

1.0000000000000000

20.0219999999999985 0.0000000000000000 0.0000000000000000

0.0000000000000000 19.8990000000000009 0.0000000000000000

0.0000000000000000 0.0000000000000000 13.3829999999999991

94 2 192 1 4 1

Selective dynamics

Direct

|                    |                    |                    |   |   |   |
|--------------------|--------------------|--------------------|---|---|---|
| 0.2677371500926237 | 0.8303223110210548 | 0.0253084666495777 | T | T | T |
| 0.3034298628266957 | 0.8707385704054085 | 0.8067548414403418 | T | T | T |
| 0.9383333324784685 | 0.3782722614175511 | 0.1848899998263258 | T | T | T |
| 0.8842452732482665 | 0.3265201657951673 | 0.9877336465116826 | T | T | T |
| 0.7304382669049128 | 0.3265161489047016 | 0.9820872638334806 | T | T | T |
| 0.6953620436813289 | 0.3737387370474100 | 0.1976468035083913 | T | T | T |
| 0.5723099676494643 | 0.3297175085768559 | 0.3322429499533529 | T | T | T |
| 0.8116844159011100 | 0.5538002618834162 | 0.3317802826607105 | T | T | T |
| 0.9297843706972778 | 0.5322842837597956 | 0.1821678744058157 | T | T | T |
| 0.8719415465098621 | 0.5729540705187910 | 0.9816826835987651 | T | T | T |
| 0.7118828651831931 | 0.5697836713531033 | 0.9831807594331781 | T | T | T |
| 0.6901815885098069 | 0.5283174788559902 | 0.1957056188482378 | T | T | T |
| 0.4195236702078444 | 0.8273156362927444 | 0.6682449088942976 | T | T | T |
| 0.5766462067856812 | 0.5547194455187299 | 0.3542529236097122 | T | T | T |
| 0.1811113156869831 | 0.0618848190110680 | 0.6661920186857836 | T | T | T |
| 0.0679274436266765 | 0.0310426688928899 | 0.8022766920066428 | T | T | T |
| 0.3173775743769675 | 0.1722395179805719 | 0.1716471332703548 | T | T | T |

**Structure files (CONTCAR) involved in this work:**

|                    |                    |                    |   |   |   |
|--------------------|--------------------|--------------------|---|---|---|
| 0.4356252963214672 | 0.1278157948758425 | 0.2976505276696790 | T | T | T |
| 0.3869972912414126 | 0.1738979249925836 | 0.5108569002866237 | T | T | T |
| 0.2321245779535673 | 0.1703977287261802 | 0.5243824254584964 | T | T | T |
| 0.1965134922590818 | 0.1302033851278199 | 0.3070877227466838 | T | T | T |
| 0.0816789563015808 | 0.1734557125625566 | 0.1676005065559564 | T | T | T |
| 0.3200732976240997 | 0.9386628080564903 | 0.1659414768208395 | T | T | T |
| 0.1223259367881862 | 0.0647806230976688 | 0.0132268875583000 | T | T | T |
| 0.4342230865848496 | 0.9695183391673200 | 0.3017348974200265 | T | T | T |
| 0.3784227460951417 | 0.9359830285403770 | 0.5135618952598274 | T | T | T |
| 0.2184427702951766 | 0.9417753769951609 | 0.5180362135248114 | T | T | T |
| 0.1952160550179418 | 0.9709109264407914 | 0.2947380007709407 | T | T | T |
| 0.0777690629763416 | 0.9419003942780338 | 0.1502262263652122 | T | T | T |
| 0.2818600609740031 | 0.0585330491883419 | 0.0182525770735627 | T | T | T |
| 0.3139404254762042 | 0.3301573214971235 | 0.1679652072378909 | T | T | T |
| 0.1918586663007129 | 0.5298641889946176 | 0.2921244884428709 | T | T | T |
| 0.2163697811540957 | 0.5586105251697440 | 0.5148012039893111 | T | T | T |
| 0.3748389634967309 | 0.5662795121173417 | 0.5125295132419301 | T | T | T |
| 0.4306657531393444 | 0.5303710081973864 | 0.3042125375170009 | T | T | T |
| 0.3190556060276227 | 0.5601806379334684 | 0.1627861963015387 | T | T | T |
| 0.0831881623760045 | 0.3265384774329595 | 0.1637297790349839 | T | T | T |
| 0.1940147387861025 | 0.3712137725089892 | 0.3072643870634334 | T | T | T |
| 0.2305652180014990 | 0.3309411359132966 | 0.5253338816658453 | T | T | T |
| 0.3847853142664620 | 0.3277889921063231 | 0.5089575456282228 | T | T | T |
| 0.4297395625027448 | 0.3738451711991006 | 0.2968205010458776 | T | T | T |
| 0.0749361922541358 | 0.5592902300082561 | 0.1460988460559769 | T | T | T |
| 0.1779971991490128 | 0.4406307574669452 | 0.6631596205011664 | T | T | T |
| 0.4169024554553033 | 0.6737884680277209 | 0.6654898864937221 | T | T | T |
| 0.3039211671760380 | 0.6298200368617758 | 0.8061960199842407 | T | T | T |
| 0.2672981862139170 | 0.6698074760502077 | 0.0246152666412101 | T | T | T |
| 0.1131944429988399 | 0.6738654812281017 | 0.0092739179720579 | T | T | T |
| 0.0637186056428240 | 0.6286503638580440 | 0.7980544652912569 | T | T | T |
| 0.1819731098841565 | 0.6708591744221212 | 0.6698772735559151 | T | T | T |
| 0.4218142903689759 | 0.4429330664751524 | 0.6456082787515931 | T | T | T |
| 0.3049286674301234 | 0.4711662428273826 | 0.7908671894493330 | T | T | T |
| 0.2801393696484172 | 0.4428638078942437 | 0.0139334629050586 | T | T | T |
| 0.1222065232997089 | 0.4364335776530396 | 0.0126315002037248 | T | T | T |
| 0.0646055775352763 | 0.4702501098557618 | 0.8033113671535552 | T | T | T |
| 0.3056024936728739 | 0.0302713351549658 | 0.7956400996828787 | T | T | T |
| 0.6143505211225934 | 0.8268339717017991 | 0.4889396076469065 | T | T | T |
| 0.5641018705943881 | 0.8756823693486753 | 0.6967140495327581 | T | T | T |
| 0.6798417754777655 | 0.8346170688757023 | 0.8307281807256914 | T | T | T |
| 0.9230494634749757 | 0.0533911912129636 | 0.8557671856678521 | T | T | T |
| 0.8030277995610092 | 0.0254266768561398 | 0.7061867518666468 | T | T | T |
| 0.7811380044698272 | 0.0672090781193084 | 0.4903235634732158 | T | T | T |
| 0.6206803384232837 | 0.0707523983478572 | 0.4899648506204178 | T | T | T |
| 0.5676501688494633 | 0.0326976511932129 | 0.6983215539935437 | T | T | T |
| 0.6801672594383105 | 0.0541708347848625 | 0.8455993544655367 | T | T | T |
| 0.9233617270800565 | 0.8302819597922845 | 0.8348640083017086 | T | T | T |
| 0.8035886465113257 | 0.8680261785702039 | 0.6907178179018857 | T | T | T |
| 0.7693150392320933 | 0.8258265813733980 | 0.4738299699365160 | T | T | T |
| 0.8805803504999039 | 0.9334904997699387 | 0.9951729715563128 | T | T | T |
| 0.9333767299267083 | 0.9688182412467813 | 0.2034852923570709 | T | T | T |
| 0.8220584445531223 | 0.9472764088870758 | 0.3512115285962428 | T | T | T |

**Structure files (CONTCAR) involved in this work:**

|                    |                    |                    |   |   |   |
|--------------------|--------------------|--------------------|---|---|---|
| 0.5783338618778617 | 0.1746615510699578 | 0.3288085600513147 | T | T | T |
| 0.6972976946598305 | 0.1327888049591258 | 0.1922284560916648 | T | T | T |
| 0.7323521490191265 | 0.1706512707299833 | 0.9714776449780501 | T | T | T |
| 0.8873271888474241 | 0.1729162303620490 | 0.9842539546890208 | T | T | T |
| 0.9371908788192933 | 0.1259510057606948 | 0.1956096954445194 | T | T | T |
| 0.8216180208836252 | 0.1724688682142299 | 0.3276772976544823 | T | T | T |
| 0.5784001937534361 | 0.9459047530380236 | 0.3578553799524544 | T | T | T |
| 0.6979046055194117 | 0.9743498500493609 | 0.2136052141111902 | T | T | T |
| 0.7204796479745342 | 0.9394263581279263 | 0.9924542218834547 | T | T | T |
| 0.1817355278357952 | 0.8287126757446721 | 0.6708746833382909 | T | T | T |
| 0.0663432731210681 | 0.8743990067479509 | 0.8000701124058293 | T | T | T |
| 0.7693914357389677 | 0.6693359217371230 | 0.4620617970570288 | T | T | T |
| 0.6139126025590086 | 0.6727366671968013 | 0.4797783694959672 | T | T | T |
| 0.5629378386909755 | 0.6275260245916487 | 0.6942724015812468 | T | T | T |
| 0.6752076488425124 | 0.6771188161662394 | 0.8200170871186179 | T | T | T |
| 0.1130239254295260 | 0.8274155243415564 | 0.0128650853531075 | T | T | T |
| 0.9192347454362126 | 0.4452954647762483 | 0.8571512638740226 | T | T | T |
| 0.8000127818395765 | 0.4780901105216776 | 0.7238701254320293 | T | T | T |
| 0.7759539674541155 | 0.4398627729428323 | 0.4952439890454427 | T | T | T |
| 0.6170325643166825 | 0.4304736034537044 | 0.4919118998030552 | T | T | T |
| 0.5673438151893828 | 0.4690442112635225 | 0.7039172683174053 | T | T | T |
| 0.6734697847631695 | 0.4444773163253436 | 0.8564230582433944 | T | T | T |
| 0.9196946044842965 | 0.6792992533960648 | 0.8256971311356284 | T | T | T |
| 0.4225565910760837 | 0.0596529920276601 | 0.6498907721759511 | T | T | T |
| 0.8224750974605501 | 0.3363717727879473 | 0.3334950336538791 | T | T | T |
| 0.8021443588862259 | 0.6371805608887058 | 0.6883189185976987 | T | T | T |
| 0.8065679731688307 | 0.5024485216648846 | 0.4274935705027790 | T | T | T |
| 0.8028341583729004 | 0.6305766096178244 | 0.3634165618314404 | T | T | T |
| 0.5854038700659611 | 0.3639761021363088 | 0.4411587756961498 | T | T | T |
| 0.5874904124634702 | 0.4981425540165721 | 0.4409625103779461 | T | T | T |
| 0.5667725680967378 | 0.6274942628477267 | 0.4064987380407209 | T | T | T |
| 0.9254395160794044 | 0.4547720297890603 | 0.1459721887097835 | T | T | T |
| 0.6729943450437533 | 0.4506944581036307 | 0.1693375236671706 | T | T | T |
| 0.7637450345640222 | 0.3750062822196000 | 0.2604740829798853 | T | T | T |
| 0.9015897581641302 | 0.3731953916813874 | 0.2950145207417464 | T | T | T |
| 0.9069117510166970 | 0.3260608539451955 | 0.1059106995634303 | T | T | T |
| 0.8077307850189253 | 0.3530347088944873 | 0.9810639620416282 | T | T | T |
| 0.7019302434994615 | 0.3306424548707866 | 0.0950451645998614 | T | T | T |
| 0.6369202537600211 | 0.3378562788728149 | 0.2619869971654729 | T | T | T |
| 0.7669811556290617 | 0.5311129411638991 | 0.2387444369700313 | T | T | T |
| 0.8915496993745082 | 0.5353658963646862 | 0.2957306186237253 | T | T | T |
| 0.8943351716866079 | 0.5794053148311702 | 0.1008572752256782 | T | T | T |
| 0.7925326320040020 | 0.5590011512966943 | 0.9793442752087621 | T | T | T |
| 0.6872656939538625 | 0.5768614004851058 | 0.0990066269536033 | T | T | T |
| 0.6409895329189150 | 0.5569378501561039 | 0.2811391219847591 | T | T | T |
| 0.5154593932925888 | 0.1352156640967561 | 0.2779861917368705 | T | T | T |
| 0.5137018719744696 | 0.9574580302194681 | 0.2865892704299435 | T | T | T |
| 0.2991306317774196 | 0.1293629787658522 | 0.0723804692775732 | T | T | T |
| 0.3117682603262034 | 0.9956647271153324 | 0.0804182744359924 | T | T | T |
| 0.3030074284619552 | 0.8649490634241719 | 0.1211808037017546 | T | T | T |
| 0.1083167803108364 | 0.1362090603879412 | 0.0676785351981035 | T | T | T |
| 0.0855072045031664 | 0.0047310891425665 | 0.0736510276383594 | T | T | T |
| 0.0673115198512714 | 0.8734624233355681 | 0.0857291496796306 | T | T | T |

**Structure files (CONTCAR) involved in this work:**

|                    |                    |                    |   |   |   |
|--------------------|--------------------|--------------------|---|---|---|
| 0.4164329142777491 | 0.0491425737848413 | 0.3112815814565429 | T | T | T |
| 0.1812299492354443 | 0.0513216279170554 | 0.2868269294050189 | T | T | T |
| 0.2704547337715097 | 0.1499780683226000 | 0.2657965855744772 | T | T | T |
| 0.3949272748568720 | 0.1595056377254973 | 0.2031503567070662 | T | T | T |
| 0.4152718901466286 | 0.1689802765100074 | 0.3978623815447480 | T | T | T |
| 0.3098500285349141 | 0.1478260822600237 | 0.5136721150156986 | T | T | T |
| 0.1920520059753152 | 0.1464477890168507 | 0.4252864086383281 | T | T | T |
| 0.1402994959907767 | 0.1749707231172030 | 0.2510986696476979 | T | T | T |
| 0.2713788654280794 | 0.9549296338802790 | 0.2604077169583695 | T | T | T |
| 0.3967627674539506 | 0.9382028823470057 | 0.2047504213344065 | T | T | T |
| 0.4084170738917474 | 0.9315824415772885 | 0.4017405128576979 | T | T | T |
| 0.2987360317655186 | 0.9497736066934714 | 0.5099468772407381 | T | T | T |
| 0.1848950496898105 | 0.9435732289283536 | 0.4076777983081419 | T | T | T |
| 0.1429476002343578 | 0.9331696947170787 | 0.2212364010413136 | T | T | T |
| 0.9861059029396276 | 0.8705070024847077 | 0.7842445921870708 | T | T | T |
| 0.9881117705430712 | 0.0397998948136230 | 0.7862590320090830 | T | T | T |
| 0.1994677387468698 | 0.8708362560380271 | 0.5705222142113671 | T | T | T |
| 0.1891353508755954 | 0.0045999961080384 | 0.5811437062701663 | T | T | T |
| 0.1987253637674384 | 0.1354280918756964 | 0.6212758398819611 | T | T | T |
| 0.3938394867305868 | 0.8648542602468290 | 0.5676546346292799 | T | T | T |
| 0.6069270344185957 | 0.7508328569954525 | 0.4465525883386541 | T | T | T |
| 0.7735817518950805 | 0.7489134966658409 | 0.4349107029338538 | T | T | T |
| 0.6839126280660934 | 0.7553908804644073 | 0.8516170400151197 | T | T | T |
| 0.9459523215078791 | 0.7538773262640193 | 0.8590821029838798 | T | T | T |
| 0.8924231989321181 | 0.2505740468474384 | 0.9461738401308927 | T | T | T |
| 0.7273988784180572 | 0.2496230858399578 | 0.9434093329942119 | T | T | T |
| 0.8187558786262563 | 0.2519515419769527 | 0.3441135325179557 | T | T | T |
| 0.5558898612485613 | 0.2513222517287986 | 0.3520279352128245 | T | T | T |
| 0.3907628410980670 | 0.2512235888070068 | 0.5490902198176352 | T | T | T |
| 0.4142378717810369 | 0.9967464913775960 | 0.5737903455973651 | T | T | T |
| 0.2256059873660161 | 0.2506985839891424 | 0.5388891854113912 | T | T | T |
| 0.3047737166497722 | 0.2508245617386659 | 0.1452366181497748 | T | T | T |
| 0.0627827544675053 | 0.2502192593990449 | 0.1362506739044024 | T | T | T |
| 0.1079254413392921 | 0.7500737133883228 | 0.0508519021205082 | T | T | T |
| 0.2728240499782949 | 0.7499245679864037 | 0.0388801683008783 | T | T | T |
| 0.1926521389971511 | 0.7498093979785534 | 0.6455151341336455 | T | T | T |
| 0.4372539623625236 | 0.7503916602406955 | 0.6380284100111392 | T | T | T |
| 0.5093827470182091 | 0.3663021286355200 | 0.2774377693806435 | T | T | T |
| 0.5107555351598334 | 0.5370222611416108 | 0.2889693821586169 | T | T | T |
| 0.2932619766297787 | 0.3709359989571887 | 0.0675776263812054 | T | T | T |
| 0.4317553326800896 | 0.1281811130892734 | 0.5852573513347264 | T | T | T |
| 0.3143683040719989 | 0.5038479235349993 | 0.0754758148808467 | T | T | T |
| 0.3021805893617768 | 0.6343607080963006 | 0.1201756640296188 | T | T | T |
| 0.1137408659304453 | 0.3634790394538230 | 0.0657715371335048 | T | T | T |
| 0.0817120690065895 | 0.4929709538199626 | 0.0763276101049343 | T | T | T |
| 0.0660586354349979 | 0.6258622304470181 | 0.0779783586940414 | T | T | T |
| 0.4101139478289288 | 0.4517575722418754 | 0.3185724124086994 | T | T | T |
| 0.1755472756947324 | 0.4497975975910364 | 0.2887489880887672 | T | T | T |
| 0.2671648815732290 | 0.3532746418333729 | 0.2620871698653286 | T | T | T |
| 0.3909638595891153 | 0.3467323694275286 | 0.1978226533760489 | T | T | T |
| 0.4080553893653102 | 0.3291149637159106 | 0.3929575220234623 | T | T | T |
| 0.0888036431471192 | 0.9523718253027347 | 0.8140856797608289 | T | T | T |
| 0.3080504687488461 | 0.3546623595121799 | 0.5174004326241937 | T | T | T |



**Structure files (CONTCAR) involved in this work:**

|                    |                    |                    |   |   |   |
|--------------------|--------------------|--------------------|---|---|---|
| 0.1912968735939614 | 0.3548663357764528 | 0.4253447744846781 | T | T | T |
| 0.1372271863207704 | 0.3259872328836790 | 0.2535364093232651 | T | T | T |
| 0.2674908222172632 | 0.5422417216887427 | 0.2532431580687866 | T | T | T |
| 0.3947433231644741 | 0.5608377264002883 | 0.2054937439660684 | T | T | T |
| 0.4059008545201851 | 0.5723910443107446 | 0.4012488521557759 | T | T | T |
| 0.2962280150113272 | 0.5464853935948570 | 0.5072000561226991 | T | T | T |
| 0.1836008091162985 | 0.5600488805741706 | 0.4037749348495295 | T | T | T |
| 0.1375950188440956 | 0.5676405963895654 | 0.2213772771744422 | T | T | T |
| 0.3188156563720432 | 0.9498703371409495 | 0.7885533930777571 | T | T | T |
| 0.2299369770520079 | 0.8511991681137813 | 0.7633967406322703 | T | T | T |
| 0.9843802109205414 | 0.6375333640998803 | 0.7816746884624736 | T | T | T |
| 0.9851937998479918 | 0.4571282794170420 | 0.7881327408385292 | T | T | T |
| 0.2004531520348505 | 0.6295344703675585 | 0.5689051093811235 | T | T | T |
| 0.1829649361009750 | 0.4961097983676894 | 0.5745809369193894 | T | T | T |
| 0.1948709619348043 | 0.3661975885905634 | 0.6206207575995253 | T | T | T |
| 0.3845102626426565 | 0.6383355392784666 | 0.5669964347373603 | T | T | T |
| 0.4137349171380913 | 0.5076006107656731 | 0.5728546619513983 | T | T | T |
| 0.4315351990807371 | 0.3760014651787765 | 0.5772292257462970 | T | T | T |
| 0.0813378865102127 | 0.5495588445740902 | 0.8163221463034982 | T | T | T |
| 0.1045470915877334 | 0.8424003079687087 | 0.7035539173270088 | T | T | T |
| 0.3211260877997797 | 0.5510498397923558 | 0.7870067673394798 | T | T | T |
| 0.2301941567167889 | 0.6476345532886448 | 0.7619997683883600 | T | T | T |
| 0.1047291921210799 | 0.6555326545343254 | 0.7005330002261911 | T | T | T |
| 0.0888139016842334 | 0.6713935422273917 | 0.8944165564745956 | T | T | T |
| 0.1895206382903825 | 0.6462794202191822 | 0.0179077354577017 | T | T | T |
| 0.3057403966931768 | 0.6456018699481018 | 0.9245298217403619 | T | T | T |
| 0.3609945864150462 | 0.6749275357419707 | 0.7534250914720625 | T | T | T |
| 0.2283979024075630 | 0.4590421589504094 | 0.7542825570353014 | T | T | T |
| 0.1017138321763333 | 0.4402870500618430 | 0.7047482199111502 | T | T | T |
| 0.0908977871562295 | 0.4305251316059833 | 0.9018078496704457 | T | T | T |
| 0.0873637849714997 | 0.8318415088248091 | 0.8985989569051530 | T | T | T |
| 0.2002694359345344 | 0.4575244993945494 | 0.0078782713791940 | T | T | T |
| 0.3124132180012034 | 0.4409492722236754 | 0.9028833287129205 | T | T | T |
| 0.3571213152276507 | 0.4328717381584331 | 0.7176903084709237 | T | T | T |
| 0.1899900588990249 | 0.8535897180875470 | 0.0187367607914041 | T | T | T |
| 0.4845759604366592 | 0.8644236734693456 | 0.7154672936013660 | T | T | T |
| 0.4889816008973527 | 0.0486077066245580 | 0.7168766511288313 | T | T | T |
| 0.6980568712743527 | 0.8716777265364467 | 0.9352459515521280 | T | T | T |
| 0.6861214252959613 | 0.0052470286501498 | 0.9421349923422319 | T | T | T |
| 0.6976114629865608 | 0.1303566276006449 | 0.8800622603440850 | T | T | T |
| 0.3063045704759569 | 0.8539740815625471 | 0.9248762620568366 | T | T | T |
| 0.9015847202664835 | 0.8642210420386756 | 0.9404387261022910 | T | T | T |
| 0.9192362577726574 | 0.9963958930858259 | 0.9428146606120504 | T | T | T |
| 0.9311376078271559 | 0.1266131411020819 | 0.9090802220358893 | T | T | T |
| 0.5783557394119444 | 0.9540048588174407 | 0.6698224420913128 | T | T | T |
| 0.8187020615521717 | 0.9479775734760164 | 0.6767957954073083 | T | T | T |
| 0.7306494033385691 | 0.8581545027488148 | 0.7420992943142035 | T | T | T |
| 0.6041708717205037 | 0.8553528510095814 | 0.7975856892571345 | T | T | T |
| 0.5884065687653166 | 0.8290708808006280 | 0.6038535484718983 | T | T | T |
| 0.6920016082486536 | 0.8509800542857319 | 0.4840139870031848 | T | T | T |
| 0.8053406720219479 | 0.8321036112445906 | 0.5820590084724553 | T | T | T |
| 0.3604982683494157 | 0.8270979646536365 | 0.7512580420447267 | T | T | T |
| 0.8611584991982386 | 0.8347111991037633 | 0.7585673403176615 | T | T | T |

**Structure files (CONTCAR) involved in this work:**

|                    |                    |                    |   |   |   |
|--------------------|--------------------|--------------------|---|---|---|
| 0.7293602664491777 | 0.0292304491189172 | 0.7564980849157393 | T | T | T |
| 0.6045626101526793 | 0.0524053356910669 | 0.8021838048454548 | T | T | T |
| 0.5972513213516898 | 0.0768429153016460 | 0.6057740525515449 | T | T | T |
| 0.7005555581777642 | 0.0587197742017239 | 0.4826530015246574 | T | T | T |
| 0.8046010896398816 | 0.0723208450570203 | 0.6065188048234903 | T | T | T |
| 0.8574212074950007 | 0.0536546621280979 | 0.7853430096215793 | T | T | T |
| 0.2294551079387198 | 0.0462232360198401 | 0.7610878762176355 | T | T | T |
| 0.0167778931029032 | 0.1364749496891973 | 0.2150934656171107 | T | T | T |
| 0.1043394200774967 | 0.0630231349772348 | 0.7048242347521448 | T | T | T |
| 0.0124424280616992 | 0.9537692238902612 | 0.2192781506703964 | T | T | T |
| 0.8037449476939736 | 0.1351173027529308 | 0.4326933136935899 | T | T | T |
| 0.8158548114712827 | 1.0011427952318621 | 0.4416849132402502 | T | T | T |
| 0.8066494969472430 | 0.8722465994346155 | 0.3915344666279612 | T | T | T |
| 0.6000450318231796 | 0.1402002706903401 | 0.4340443556717962 | T | T | T |
| 0.5829606389544401 | 0.0081584534837314 | 0.4363069251420015 | T | T | T |
| 0.5691707743734946 | 0.8764225151791525 | 0.4201271672354081 | T | T | T |
| 0.9212108372548364 | 0.0473935957640247 | 0.1757908299930757 | T | T | T |
| 0.6795996040694613 | 0.0533238585379455 | 0.2000787569294082 | T | T | T |
| 0.7706055665725753 | 0.1478350278989150 | 0.2392523648633720 | T | T | T |
| 0.0918518797804454 | 0.0709277910100517 | 0.9018275757471205 | T | T | T |
| 0.8972486149050799 | 0.1514397372860458 | 0.2938046370706701 | T | T | T |
| 0.9155427349299559 | 0.1690114194121420 | 0.0976082656266454 | T | T | T |
| 0.8101383453079166 | 0.1475606163950466 | 0.9820630698340873 | T | T | T |
| 0.6945796643032278 | 0.1556351095148840 | 0.0761614314837798 | T | T | T |
| 0.6406560158886491 | 0.1751352511745544 | 0.2517049706330309 | T | T | T |
| 0.7724269009540118 | 0.9678450726958254 | 0.2600382719301477 | T | T | T |
| 0.8978128655530431 | 0.9486402083578748 | 0.3079737093922220 | T | T | T |
| 0.9027736701487796 | 0.9255065770449173 | 0.1112214966020067 | T | T | T |
| 0.8010813424385685 | 0.9476075911587180 | 0.9864107199881501 | T | T | T |
| 0.6955961915389089 | 0.9349956769696530 | 0.1076022280747687 | T | T | T |
| 0.2016723858216151 | 0.0494941494382026 | 0.0091016442941542 | T | T | T |
| 0.6444795919637223 | 0.9400052252574516 | 0.2886714610553002 | T | T | T |
| 0.3158827953234423 | 0.0583260523536336 | 0.9082598624416427 | T | T | T |
| 0.4819869801026117 | 0.6327205982671541 | 0.7035713707356025 | T | T | T |
| 0.4880035174690542 | 0.4535615019953541 | 0.7128350024977133 | T | T | T |
| 0.6910382180357237 | 0.6361673171736898 | 0.9232895972251094 | T | T | T |
| 0.6758379820968393 | 0.5025502741907272 | 0.9409116234296427 | T | T | T |
| 0.6869525019406416 | 0.3716602772836001 | 0.9061824529668883 | T | T | T |
| 0.8946085459614680 | 0.6417734311960006 | 0.9288760748056760 | T | T | T |
| 0.9102123715170297 | 0.5087012754150871 | 0.9327323502461835 | T | T | T |
| 0.3580183945420309 | 0.0679331379860684 | 0.7222816627081389 | T | T | T |
| 0.9312272247021512 | 0.3775784752586210 | 0.9243191324036663 | T | T | T |
| 0.5825634738590063 | 0.5482780866928486 | 0.6881341388837656 | T | T | T |
| 0.8203259169532671 | 0.5548231134044760 | 0.7257680097627205 | T | T | T |
| 0.7215911108668263 | 0.6569033419646184 | 0.7279730145525547 | T | T | T |
| 0.5964502700436926 | 0.6627730098070861 | 0.7913403171715928 | T | T | T |
| 0.5879292536629190 | 0.6649350546468726 | 0.5934160266076729 | T | T | T |
| 0.6905232820941979 | 0.6468313948497847 | 0.4666294851937812 | T | T | T |
| 0.8084592101923957 | 0.6462821917999753 | 0.5591176716652856 | T | T | T |
| 0.8622752999795760 | 0.6865031505603514 | 0.7451780175034657 | T | T | T |
| 0.7269795915893870 | 0.4608374490229519 | 0.7692505390819702 | T | T | T |
| 0.5995456534460436 | 0.4417140100555798 | 0.8071181046025230 | T | T | T |
| 0.6006569702905107 | 0.4288490749194839 | 0.6098155136931580 | T | T | T |

**Structure files (CONTCAR) involved in this work:**

|                    |                    |                    |   |   |   |
|--------------------|--------------------|--------------------|---|---|---|
| 0.6982399880061119 | 0.4285820202272165 | 0.4734845205847985 | T | T | T |
| 0.7969816161933434 | 0.4493801756502549 | 0.6089151942014093 | T | T | T |
| 0.8561407797626026 | 0.4329729665370475 | 0.7831303296447555 | T | T | T |
| 0.0172960929178620 | 0.3669803872110726 | 0.2035001206198907 | T | T | T |
| 0.0058707676185562 | 0.5517424460962439 | 0.2115087345894001 | T | T | T |
| 0.8238017976346086 | 0.3758729138655817 | 0.4571766225622770 | T | T | T |
| 0.9148097667744116 | 0.4552315378574924 | 0.3836312184712480 | T | T | T |
| 0.8824810963675030 | 0.3961771000492287 | 0.4869550672738833 | T | T | T |
| 0.9885527606894333 | 0.3924996521599062 | 0.5125801292702682 | T | T | T |
| 0.9189385466523680 | 0.4117038030058940 | 0.5907512240126755 | T | T | T |
| 0.9622593266282572 | 0.4770566726270494 | 0.5409870611253149 | T | T | T |
| 0.9453316805385841 | 0.4257775834545196 | 0.5212725177189236 | T | T | T |

**Figure S7 FS**

Si Al O Zn H C

1.0000000000000000

20.0219999999999985 0.0000000000000000 0.0000000000000000

0.0000000000000000 19.8990000000000009 0.0000000000000000

0.0000000000000000 0.0000000000000000 13.3829999999999991

94 2 192 1 4 1

Selective dynamics

Direct

|                    |                    |                    |   |   |   |
|--------------------|--------------------|--------------------|---|---|---|
| 0.2678638866464722 | 0.8305388386462660 | 0.0257600659575473 | T | T | T |
| 0.3039590917776484 | 0.8705760730082084 | 0.8077266444552818 | T | T | T |
| 0.9376805821667640 | 0.3787388330945742 | 0.1886307857791885 | T | T | T |
| 0.8845824322826932 | 0.3257686364600815 | 0.9914447335792087 | T | T | T |
| 0.7307901488611240 | 0.3263209203979411 | 0.9697748841912782 | T | T | T |
| 0.6893694551107648 | 0.3710201984326352 | 0.1832203699706478 | T | T | T |
| 0.5763507742046705 | 0.3278055950357886 | 0.3289303570526497 | T | T | T |
| 0.8139715621527732 | 0.5477133488559464 | 0.3281399562517196 | T | T | T |
| 0.9322792464548585 | 0.5322194178578613 | 0.1820873549465034 | T | T | T |
| 0.8757882377146035 | 0.5729615273740293 | 0.9808149065841354 | T | T | T |
| 0.7155183651390804 | 0.5648561534724048 | 0.9792624444955229 | T | T | T |
| 0.6889361026608869 | 0.5257053049786181 | 0.1955258535412697 | T | T | T |
| 0.4204195855912112 | 0.8266102773843267 | 0.6694222051069382 | T | T | T |
| 0.5760837500688575 | 0.5563427394134016 | 0.3491881540908850 | T | T | T |
| 0.1820022719019516 | 0.0617270948160459 | 0.6677502526399657 | T | T | T |
| 0.0679362769853697 | 0.0314429350831259 | 0.8023555606812997 | T | T | T |
| 0.3176020541853738 | 0.1718992760064508 | 0.1736113572364076 | T | T | T |
| 0.4359291146612400 | 0.1275637486402480 | 0.2997452925701726 | T | T | T |
| 0.3875884872086532 | 0.1736508454849168 | 0.5128473542904798 | T | T | T |
| 0.2327806287287316 | 0.1703647955650701 | 0.5258765751428507 | T | T | T |
| 0.1966192188304593 | 0.1296802646960042 | 0.3089605645620840 | T | T | T |
| 0.0815179652811064 | 0.1726033446700289 | 0.1694644051143263 | T | T | T |
| 0.3194473730644211 | 0.9388093184629741 | 0.1673856042377114 | T | T | T |
| 0.1221553904707130 | 0.0650937915594569 | 0.0136839882599359 | T | T | T |
| 0.4342314376846677 | 0.9691677987838510 | 0.3023896156233808 | T | T | T |
| 0.3788510463564794 | 0.9351863990536390 | 0.5139582352496681 | T | T | T |
| 0.2187390346712572 | 0.9409115273476948 | 0.5196362978558787 | T | T | T |
| 0.1951553290320621 | 0.9703827511635629 | 0.2968800860078146 | T | T | T |
| 0.0784383636563932 | 0.9416479766292229 | 0.1510275102490628 | T | T | T |
| 0.2817259469676466 | 0.0590606095353866 | 0.0193701561458685 | T | T | T |
| 0.3156093949924340 | 0.3298476378369757 | 0.1720123042139916 | T | T | T |
| 0.1919012699938733 | 0.5298904660432651 | 0.2953769213994752 | T | T | T |

**Structure files (CONTCAR) involved in this work:**

|                    |                    |                    |   |   |   |
|--------------------|--------------------|--------------------|---|---|---|
| 0.2181467507016782 | 0.5581448889824721 | 0.5168788310357698 | T | T | T |
| 0.3763879839124123 | 0.5655273608833149 | 0.5124119466022833 | T | T | T |
| 0.4315930718165162 | 0.5313763633211120 | 0.3026844847293066 | T | T | T |
| 0.3173558726163726 | 0.5609743498380383 | 0.1658174335387038 | T | T | T |
| 0.0817063367489229 | 0.3259461677222276 | 0.1690589512941483 | T | T | T |
| 0.1945315265259930 | 0.3713162952570390 | 0.3094136994057535 | T | T | T |
| 0.2313825674414486 | 0.3309969206692914 | 0.5275036314035210 | T | T | T |
| 0.3856821894099256 | 0.3276953036497983 | 0.5130183265873438 | T | T | T |
| 0.4317974420267093 | 0.3740740622366822 | 0.3006454518258134 | T | T | T |
| 0.0766492712854309 | 0.5598494212614541 | 0.1474049616637782 | T | T | T |
| 0.1793169369332302 | 0.4400117822517909 | 0.6667018907386765 | T | T | T |
| 0.4173012603252753 | 0.6730289062622961 | 0.6667298004966333 | T | T | T |
| 0.3046146412711880 | 0.6297011644321838 | 0.8088401994681277 | T | T | T |
| 0.2674461059332714 | 0.6700666529942189 | 0.0254732978457456 | T | T | T |
| 0.1134920664599584 | 0.6737406630182461 | 0.0082943062101832 | T | T | T |
| 0.0640040548921391 | 0.6270766859684407 | 0.7977850707944693 | T | T | T |
| 0.1833393946328094 | 0.6699964918101728 | 0.6720890243491203 | T | T | T |
| 0.4214494632113281 | 0.4428052799358618 | 0.6490910518362704 | T | T | T |
| 0.3050288375108535 | 0.4708739482060068 | 0.7948622281525091 | T | T | T |
| 0.2804405317783542 | 0.4419494469646711 | 0.0171376737040051 | T | T | T |
| 0.1215099315121059 | 0.4350361711967556 | 0.0146799428679635 | T | T | T |
| 0.0646495673326389 | 0.4686388733020235 | 0.8048003036680035 | T | T | T |
| 0.3058344726364228 | 0.0301181681560326 | 0.7973082590303108 | T | T | T |
| 0.6144582450182150 | 0.8258449000897036 | 0.4870685634209525 | T | T | T |
| 0.5653953059201627 | 0.8737583380580372 | 0.6969491898719914 | T | T | T |
| 0.6827661625805261 | 0.8302882201286274 | 0.8266038694182672 | T | T | T |
| 0.9230106812946666 | 0.0530683610022136 | 0.8539937944156863 | T | T | T |
| 0.8040898419292590 | 0.0240380447152038 | 0.7031909282065734 | T | T | T |
| 0.7812314910460336 | 0.0644719253126432 | 0.4876368470514910 | T | T | T |
| 0.6206357706223122 | 0.0690968801343851 | 0.4898539641600674 | T | T | T |
| 0.5669307722536731 | 0.0312587981985606 | 0.6982518548246734 | T | T | T |
| 0.6810224270227960 | 0.0528728904529706 | 0.8415038354675654 | T | T | T |
| 0.9232318147020894 | 0.8295054809795313 | 0.8308125396436826 | T | T | T |
| 0.8048477020130587 | 0.8655705185175302 | 0.6849027808940763 | T | T | T |
| 0.7695037820418710 | 0.8229497010044153 | 0.4679707738110789 | T | T | T |
| 0.8807789135601644 | 0.9324864706731606 | 0.9926329114433207 | T | T | T |
| 0.9339646352783070 | 0.9671894385446876 | 0.2007140718084823 | T | T | T |
| 0.8203697645220704 | 0.9445005586472076 | 0.3446978649372552 | T | T | T |
| 0.5791555225547367 | 0.1737717430469929 | 0.3298342247065891 | T | T | T |
| 0.6966049390736737 | 0.1307940933246975 | 0.1898262871201458 | T | T | T |
| 0.7330868087637987 | 0.1693073691050870 | 0.9705564591638054 | T | T | T |
| 0.8877900353369189 | 0.1721419373373604 | 0.9849696356698052 | T | T | T |
| 0.9377586906039896 | 0.1238290216982320 | 0.1949263412459024 | T | T | T |
| 0.8212060538517455 | 0.1695236015346144 | 0.3247201707478369 | T | T | T |
| 0.5786208036104388 | 0.9446867982850921 | 0.3553778087859422 | T | T | T |
| 0.6965412044638641 | 0.9720616375354684 | 0.2078657180713003 | T | T | T |
| 0.7210318968402963 | 0.9367813157091939 | 0.9883860972725624 | T | T | T |
| 0.1819189561791585 | 0.8281848587986237 | 0.6727763851505397 | T | T | T |
| 0.0661180002970847 | 0.8748599850421183 | 0.8004834447187414 | T | T | T |
| 0.7682196032172846 | 0.6661077128014007 | 0.4599353640364460 | T | T | T |
| 0.6127072214537286 | 0.6724428096750723 | 0.4794793890080961 | T | T | T |
| 0.5628553623501324 | 0.6267101752923989 | 0.6929011874116333 | T | T | T |
| 0.6773063400812184 | 0.6721614853021346 | 0.8182679166323095 | T | T | T |

**Structure files (CONTCAR) involved in this work:**

|                    |                    |                    |   |   |   |
|--------------------|--------------------|--------------------|---|---|---|
| 0.1133287750676407 | 0.8275122649457157 | 0.0128151352953240 | T | T | T |
| 0.9204112382687849 | 0.4434082625188817 | 0.8589106657029156 | T | T | T |
| 0.8061646980713283 | 0.4733943037020716 | 0.7155025935119372 | T | T | T |
| 0.7776627254741532 | 0.4390700572525387 | 0.4955268172978491 | T | T | T |
| 0.6175321606267550 | 0.4337378311612907 | 0.4888389428063573 | T | T | T |
| 0.5657816525268753 | 0.4688383437928518 | 0.7001921545710589 | T | T | T |
| 0.6795509508130614 | 0.4424327866830981 | 0.8404039707134067 | T | T | T |
| 0.9209560465715086 | 0.6784301455261493 | 0.8231377474886025 | T | T | T |
| 0.4222638239593522 | 0.0589709330883669 | 0.6507998684751862 | T | T | T |
| 0.8185976016003418 | 0.3331044329029841 | 0.3150417810498451 | T | T | T |
| 0.8045231788495742 | 0.6328969957774327 | 0.6847687491253526 | T | T | T |
| 0.8154487618561234 | 0.4909138788897452 | 0.4200411834194269 | T | T | T |
| 0.7986991012213709 | 0.6226244602265073 | 0.3641548524407890 | T | T | T |
| 0.6021291562394165 | 0.3639099066225140 | 0.4314795087800286 | T | T | T |
| 0.5838553991977931 | 0.4968304145178021 | 0.4323416987114777 | T | T | T |
| 0.5657128216648739 | 0.6272993667773199 | 0.4061958426661287 | T | T | T |
| 0.9288581133272507 | 0.4544560156220433 | 0.1450640897748025 | T | T | T |
| 0.6646849832250000 | 0.4491122405792637 | 0.1764235236266435 | T | T | T |
| 0.7612426666881842 | 0.3671331318416259 | 0.2366791777848096 | T | T | T |
| 0.8963134265509687 | 0.3754190070789293 | 0.2958003404221125 | T | T | T |
| 0.9067579720997399 | 0.3255026303116446 | 0.1098571223490417 | T | T | T |
| 0.8077445251175643 | 0.3514055396701571 | 0.9851508926269826 | T | T | T |
| 0.6899250180198354 | 0.3385576808297650 | 0.0722990045100732 | T | T | T |
| 0.6348149521779413 | 0.3285791651526874 | 0.2463507141004113 | T | T | T |
| 0.7655348347871247 | 0.5237872144516569 | 0.2393591825885422 | T | T | T |
| 0.8923342417200679 | 0.5364886482806809 | 0.2909945340250082 | T | T | T |
| 0.8988045855904510 | 0.5793726386210045 | 0.0987020058606973 | T | T | T |
| 0.7963711135940840 | 0.5595475801882450 | 0.9784888529901664 | T | T | T |
| 0.6884303002114492 | 0.5693304079564616 | 0.0939612643624800 | T | T | T |
| 0.6415163405148839 | 0.5608849186553566 | 0.2781859111930055 | T | T | T |
| 0.5156363782518377 | 0.1354136280778052 | 0.2793585290458299 | T | T | T |
| 0.5134823418045896 | 0.9566621449617141 | 0.2853901491369342 | T | T | T |
| 0.2992265540950969 | 0.1298242023774474 | 0.0735680754528520 | T | T | T |
| 0.3104079207281504 | 0.9961779489852243 | 0.0826719044391494 | T | T | T |
| 0.3024691201907813 | 0.8652475590640146 | 0.1221448564976407 | T | T | T |
| 0.1079874499220116 | 0.1364063012412557 | 0.0685138193798049 | T | T | T |
| 0.0863884540255938 | 0.0046121709994749 | 0.0746766781651419 | T | T | T |
| 0.0679898614586001 | 0.8731860164580343 | 0.0867221569233303 | T | T | T |
| 0.4172042275552367 | 0.0488386248978628 | 0.3141358534605944 | T | T | T |
| 0.1812455288172506 | 0.0507695282923800 | 0.2893872570325701 | T | T | T |
| 0.2705270536053978 | 0.1491915882235443 | 0.2673001481985433 | T | T | T |
| 0.3950646051201960 | 0.1586436616154210 | 0.2050689264260312 | T | T | T |
| 0.4159921601177734 | 0.1690815196968310 | 0.3998139706845150 | T | T | T |
| 0.3104653930470033 | 0.1475828684971718 | 0.5149571104458806 | T | T | T |
| 0.1924296448428967 | 0.1464363871017212 | 0.4270129338560800 | T | T | T |
| 0.1402133943967458 | 0.1739688960579099 | 0.2527599144812800 | T | T | T |
| 0.2713884507807975 | 0.9544478420316256 | 0.2627905176701754 | T | T | T |
| 0.3963298999032898 | 0.9387906352628372 | 0.2052236515025634 | T | T | T |
| 0.4089273648769500 | 0.9305900709017189 | 0.4021433418252711 | T | T | T |
| 0.2990445289472830 | 0.9478481425183517 | 0.5101734978680939 | T | T | T |
| 0.1845304501180593 | 0.9429564997356968 | 0.4097050835880756 | T | T | T |
| 0.1432828852954415 | 0.9328302681201410 | 0.2226025193071330 | T | T | T |
| 0.9859576151804851 | 0.8715762384816468 | 0.7837075714627011 | T | T | T |

**Structure files (CONTCAR) involved in this work:**

|                    |                    |                    |   |   |   |
|--------------------|--------------------|--------------------|---|---|---|
| 0.9882819665832822 | 0.0406160528412675 | 0.7845161495526060 | T | T | T |
| 0.1995085923434890 | 0.8701281800929092 | 0.5722011035904621 | T | T | T |
| 0.1907014228715981 | 0.0041880476612823 | 0.5831477061846547 | T | T | T |
| 0.1997961256909311 | 0.1352398633148594 | 0.6229521729082799 | T | T | T |
| 0.3956112934889114 | 0.8646687457617829 | 0.5688148715024502 | T | T | T |
| 0.6060508781442536 | 0.7501199349007486 | 0.4444260226017623 | T | T | T |
| 0.7735514815336078 | 0.7455322715938048 | 0.4303724327832016 | T | T | T |
| 0.6872277009781675 | 0.7509294049131695 | 0.8473592622645670 | T | T | T |
| 0.9468720836296823 | 0.7534999582306742 | 0.8548516127539718 | T | T | T |
| 0.8928050179992896 | 0.2500911955430546 | 0.9484490996557806 | T | T | T |
| 0.7291056374091369 | 0.2477661328318783 | 0.9398370325712553 | T | T | T |
| 0.8185000356500644 | 0.2495606661161997 | 0.3404544658358791 | T | T | T |
| 0.5582231943722097 | 0.2506475459873062 | 0.3556712795715577 | T | T | T |
| 0.3914066219915915 | 0.2507949879255765 | 0.5517136357617678 | T | T | T |
| 0.4136576330412846 | 0.9968833449844351 | 0.5733840746525433 | T | T | T |
| 0.2264076454441584 | 0.2506434121988330 | 0.5402419299861186 | T | T | T |
| 0.3055410501966729 | 0.2507050706953633 | 0.1486598515708927 | T | T | T |
| 0.0619115714816004 | 0.2495068206030469 | 0.1407694927910371 | T | T | T |
| 0.1088518015660290 | 0.7500398708529151 | 0.0497848332756739 | T | T | T |
| 0.2727960918471503 | 0.7502135897898252 | 0.0397700875831580 | T | T | T |
| 0.1925973896656755 | 0.7492144522040030 | 0.6481408046958606 | T | T | T |
| 0.4374206944097614 | 0.7496184828577933 | 0.6389096783993228 | T | T | T |
| 0.5117207013087299 | 0.3667464748754365 | 0.2835755335956968 | T | T | T |
| 0.5109012858232532 | 0.5403990394592803 | 0.2814999096984951 | T | T | T |
| 0.2964789408046182 | 0.3708995367215140 | 0.0713274138871963 | T | T | T |
| 0.4323107669412762 | 0.1278362538964940 | 0.5872299175349853 | T | T | T |
| 0.3111229300946104 | 0.5046350608188079 | 0.0789193389436331 | T | T | T |
| 0.2999794978631266 | 0.6350377223475037 | 0.1232064555493433 | T | T | T |
| 0.1096997539937701 | 0.3632862821559842 | 0.0698498780120402 | T | T | T |
| 0.0838436350325842 | 0.4939482551060569 | 0.0769587190420027 | T | T | T |
| 0.0674668414965649 | 0.6263669134125537 | 0.0792288487982195 | T | T | T |
| 0.4126076839291131 | 0.4524670260505476 | 0.3181047492590993 | T | T | T |
| 0.1760716890997455 | 0.4497476321659695 | 0.2897018270984720 | T | T | T |
| 0.2679986151531605 | 0.3532948240527570 | 0.2649551164739174 | T | T | T |
| 0.3928096434732845 | 0.3450575023336928 | 0.2030104509979036 | T | T | T |
| 0.4101770312525643 | 0.3305532149666994 | 0.3977941610808681 | T | T | T |
| 0.0886704292402488 | 0.9527862363305107 | 0.8144417254248291 | T | T | T |
| 0.3089761062509197 | 0.3545460078726806 | 0.5199010145708941 | T | T | T |
| 0.1922060052853136 | 0.3554528914894592 | 0.4277235496792504 | T | T | T |
| 0.1378719011013732 | 0.3256944286189696 | 0.2559904106669093 | T | T | T |
| 0.2679939337745919 | 0.5431418418710872 | 0.2588634780865042 | T | T | T |
| 0.3935752318682933 | 0.5617313558538904 | 0.2059225271152559 | T | T | T |
| 0.4092281348713082 | 0.5721019367772147 | 0.4022776118891800 | T | T | T |
| 0.2977961405706803 | 0.5463719294106657 | 0.5039516867604602 | T | T | T |
| 0.1825134396030989 | 0.5587447950492749 | 0.4076858193968999 | T | T | T |
| 0.1392592906818484 | 0.5684034823003765 | 0.2229226979902734 | T | T | T |
| 0.3190404831030256 | 0.9497586181503980 | 0.7894266745858191 | T | T | T |
| 0.2303006032640059 | 0.8509139582038520 | 0.7650184257295481 | T | T | T |
| 0.9851892195962986 | 0.6369529619180192 | 0.7777485243747859 | T | T | T |
| 0.9855939446685591 | 0.4538187871803536 | 0.7880164827801758 | T | T | T |
| 0.2041509007270392 | 0.6293022728843702 | 0.5715631310993198 | T | T | T |
| 0.1866654242451417 | 0.4960162764887641 | 0.5793961149926922 | T | T | T |
| 0.1962470112154255 | 0.3657605729228054 | 0.6234976810418471 | T | T | T |

**Structure files (CONTCAR) involved in this work:**

|                    |                    |                    |   |   |   |
|--------------------|--------------------|--------------------|---|---|---|
| 0.3857962420525414 | 0.6372684738151323 | 0.5679561597189919 | T | T | T |
| 0.4138685415654811 | 0.5062958868241152 | 0.5738778568937187 | T | T | T |
| 0.4322380935139440 | 0.3749416340468570 | 0.5830657573961766 | T | T | T |
| 0.0803004379877408 | 0.5481146488562137 | 0.8191447018559778 | T | T | T |
| 0.1047299020125656 | 0.8423469715084528 | 0.7048349156558564 | T | T | T |
| 0.3209487409600489 | 0.5507823237574787 | 0.7898193572392611 | T | T | T |
| 0.2307263631303782 | 0.6480664647698565 | 0.7659244627623865 | T | T | T |
| 0.1063228265135990 | 0.6525442137879247 | 0.7007319650734001 | T | T | T |
| 0.0877480830830476 | 0.6708164287559301 | 0.8940973541800011 | T | T | T |
| 0.1899966087955410 | 0.6464150049778676 | 0.0146762300280226 | T | T | T |
| 0.3079757834388934 | 0.6458300362780635 | 0.9271362792252467 | T | T | T |
| 0.3612403981214927 | 0.6743634229374260 | 0.7542594986013714 | T | T | T |
| 0.2284420921377152 | 0.4575795404762386 | 0.7599070968136498 | T | T | T |
| 0.1028972935889114 | 0.4397658173281822 | 0.7067754349928552 | T | T | T |
| 0.0903081655485385 | 0.4290282301797644 | 0.9038287088868926 | T | T | T |
| 0.0864685992598009 | 0.8324012727269671 | 0.8992892620774242 | T | T | T |
| 0.2002870645003897 | 0.4525866945381306 | 0.0090257172366664 | T | T | T |
| 0.3140973202463690 | 0.4412517415820578 | 0.9069194931541121 | T | T | T |
| 0.3564668599587066 | 0.4328553880559171 | 0.7202270133125034 | T | T | T |
| 0.1902331744683307 | 0.8540822643133535 | 0.0176334529682542 | T | T | T |
| 0.4860137741690497 | 0.8624963803648531 | 0.7172498173597767 | T | T | T |
| 0.4882801566151032 | 0.0462899634219925 | 0.7181534616351150 | T | T | T |
| 0.7030587551498210 | 0.8680266296424635 | 0.9300335725364880 | T | T | T |
| 0.6867128888592599 | 0.0012695607805447 | 0.9346637364363031 | T | T | T |
| 0.6994149313976342 | 0.1279849029875791 | 0.8795126977981704 | T | T | T |
| 0.3072862525303816 | 0.8539438281417386 | 0.9258896660090131 | T | T | T |
| 0.8981706699134075 | 0.8632810189138115 | 0.9349653384505704 | T | T | T |
| 0.9193627853085253 | 0.9952256310100189 | 0.9397195750819315 | T | T | T |
| 0.9306231850822714 | 0.1260165561770685 | 0.9083641497686967 | T | T | T |
| 0.5791747692339032 | 0.9524865838527682 | 0.6719850510928186 | T | T | T |
| 0.8190635530589792 | 0.9460634284594081 | 0.6766529588189309 | T | T | T |
| 0.7320145711579311 | 0.8531443629052297 | 0.7355338025900047 | T | T | T |
| 0.6067200795661908 | 0.8517958604304630 | 0.7960607327119975 | T | T | T |
| 0.5889114851342780 | 0.8286518007333074 | 0.6020898341469778 | T | T | T |
| 0.6924833312900990 | 0.8483528784426660 | 0.4811721648468086 | T | T | T |
| 0.8073614573577956 | 0.8321203487637456 | 0.5744773620321714 | T | T | T |
| 0.3610554361419843 | 0.8271448935461122 | 0.7518962384269445 | T | T | T |
| 0.8628977674463904 | 0.8317017285827564 | 0.7510401988262684 | T | T | T |
| 0.7294600060794280 | 0.0302376858651056 | 0.7499833626281441 | T | T | T |
| 0.6049369153683024 | 0.0530809666206162 | 0.8001935466604351 | T | T | T |
| 0.5945868877799163 | 0.0750297331453913 | 0.6041649209993032 | T | T | T |
| 0.7005511080731518 | 0.0571033336490184 | 0.4865139589300549 | T | T | T |
| 0.8085595202817566 | 0.0692465485905547 | 0.6019163504430065 | T | T | T |
| 0.8572944791948723 | 0.0531059873056202 | 0.7835288070954753 | T | T | T |
| 0.2295517005935174 | 0.0462593974667752 | 0.7636210852808587 | T | T | T |
| 0.0171112737207060 | 0.1340425773147373 | 0.2161582620266401 | T | T | T |
| 0.1050090445771980 | 0.0631882945276743 | 0.7053375260957605 | T | T | T |
| 0.0129144869183133 | 0.9534810626371673 | 0.2198275157357399 | T | T | T |
| 0.8026455358045290 | 0.1330861611064830 | 0.4301852109605131 | T | T | T |
| 0.8129463232571257 | 0.9981662166974351 | 0.4354491472523160 | T | T | T |
| 0.8048765482624280 | 0.8690430253071124 | 0.3831574823396156 | T | T | T |
| 0.6014296614360192 | 0.1390024467514931 | 0.4343855971413154 | T | T | T |
| 0.5842378811097413 | 0.0069625556439420 | 0.4334875123145804 | T | T | T |

**Structure files (CONTCAR) involved in this work:**

|                    |                    |                    |   |   |   |
|--------------------|--------------------|--------------------|---|---|---|
| 0.5695055023913794 | 0.8756293358543764 | 0.4184124187783796 | T | T | T |
| 0.9211314624727363 | 0.0456872936928345 | 0.1727714374423923 | T | T | T |
| 0.6786967621440610 | 0.0513041852290432 | 0.1948995470498061 | T | T | T |
| 0.7704251776264154 | 0.1447159543217923 | 0.2364281210740432 | T | T | T |
| 0.0908175381016686 | 0.0710461143338700 | 0.9027343699832219 | T | T | T |
| 0.8970402694069708 | 0.1485113688725556 | 0.2930218944365973 | T | T | T |
| 0.9168717742596151 | 0.1680447825318893 | 0.0978090439183180 | T | T | T |
| 0.8106639375896585 | 0.1464842382256097 | 0.9843022823835871 | T | T | T |
| 0.6938714984037035 | 0.1560411073411730 | 0.0747610113359476 | T | T | T |
| 0.6409323221865729 | 0.1727912192203983 | 0.2516521089132493 | T | T | T |
| 0.7716167445430629 | 0.9651255827415482 | 0.2523816237039780 | T | T | T |
| 0.8965933860449319 | 0.9466442434316390 | 0.3035890886928878 | T | T | T |
| 0.9061645643662356 | 0.9233573198973456 | 0.1070316173709081 | T | T | T |
| 0.8013445446516941 | 0.9481423097490668 | 0.9896239028042881 | T | T | T |
| 0.6922488669478216 | 0.9328539919792924 | 0.1017634579680907 | T | T | T |
| 0.2016096369442913 | 0.0507282791200230 | 0.0081533354097537 | T | T | T |
| 0.6440021326482592 | 0.9381701317667215 | 0.2847850428084504 | T | T | T |
| 0.3166813631490192 | 0.0579719594365879 | 0.9099599194212264 | T | T | T |
| 0.4822285368640871 | 0.6322378917108756 | 0.7061498501308093 | T | T | T |
| 0.4868500242326420 | 0.4546976759423263 | 0.7180809132071511 | T | T | T |
| 0.6910431813448192 | 0.6311868864845966 | 0.9221183699850124 | T | T | T |
| 0.6863063824646939 | 0.4956592883622111 | 0.9314574411235347 | T | T | T |
| 0.6968058467868643 | 0.3672339636303668 | 0.8789047101348091 | T | T | T |
| 0.8978739280068918 | 0.6417711178697887 | 0.9276908528239112 | T | T | T |
| 0.9131208577924208 | 0.5085520906117849 | 0.9311083658802787 | T | T | T |
| 0.3578073660676347 | 0.0677240262550610 | 0.7231739961203619 | T | T | T |
| 0.9318275987736454 | 0.3768087951177445 | 0.9286160128858160 | T | T | T |
| 0.5818931980470644 | 0.5475416510813472 | 0.6811178771078298 | T | T | T |
| 0.8273276929008616 | 0.5496883087201611 | 0.7110011029999049 | T | T | T |
| 0.7237094579650368 | 0.6484943572210575 | 0.7280449615954990 | T | T | T |
| 0.5982397707330418 | 0.6596986004593351 | 0.7899533891433200 | T | T | T |
| 0.5861447927204088 | 0.6663184231401725 | 0.5930574286981454 | T | T | T |
| 0.6890780801539098 | 0.6457238943873681 | 0.4688014236029444 | T | T | T |
| 0.8088464485925630 | 0.6452252327058733 | 0.5564126242413912 | T | T | T |
| 0.8620130999477090 | 0.6835687492479776 | 0.7447461051693695 | T | T | T |
| 0.7286046626135161 | 0.4617559508447510 | 0.7480882669372733 | T | T | T |
| 0.6033517120188584 | 0.4418457435695870 | 0.7994423579196385 | T | T | T |
| 0.5917610768339200 | 0.4270074428617650 | 0.6024173835822203 | T | T | T |
| 0.6987317131776715 | 0.4462502981187885 | 0.4884718205357969 | T | T | T |
| 0.8110795522494744 | 0.4368590522169162 | 0.6035589430150869 | T | T | T |
| 0.8553277264468181 | 0.4300705509777102 | 0.7888172389482561 | T | T | T |
| 0.0156018048015060 | 0.3643668177078381 | 0.2126696687311359 | T | T | T |
| 0.0080635033447529 | 0.5518529467441158 | 0.2126567341121904 | T | T | T |
| 0.8006070628084730 | 0.3627869454329894 | 0.4465156052866049 | T | T | T |
| 0.9296412101227898 | 0.4527989821579350 | 0.3923048691391073 | T | T | T |
| 0.8065698466675463 | 0.3267187298704992 | 0.4952912776373388 | T | T | T |
| 1.0191274342925307 | 0.3952725913351541 | 0.4908233009437600 | T | T | T |
| 0.9788522689204128 | 0.4575622952489921 | 0.5667751190753040 | T | T | T |
| 0.0393978187900907 | 0.4823767766418523 | 0.4751065717862865 | T | T | T |
| 0.9991806005957479 | 0.4467107404045900 | 0.4923479758381175 | T | T | T |

**Figure 2(a) Zn-IS**

1.0000000000000000

20.0219993591000005 0.0000000000000000 0.0000000000000000



**Structure files (CONTCAR) involved in this work:**

0.0000000000000000 19.8990001678000006 0.0000000000000000  
0.0000000000000000 0.0000000000000000 13.3830003737999998  
93 3 194 2 5 1

## Selective dynamics

## Direct

|                    |                    |                    |   |   |   |
|--------------------|--------------------|--------------------|---|---|---|
| 0.4247171342385609 | 0.0567724569997377 | 0.6465395174485217 | T | T | T |
| 0.3054056157095704 | 0.0256479993467039 | 0.7911183933717073 | T | T | T |
| 0.2825575388532212 | 0.0594281293448225 | 0.0125672329076761 | T | T | T |
| 0.1229298077557921 | 0.0639051383725257 | 0.0113757860173090 | T | T | T |
| 0.0704269480429186 | 0.0297499681934660 | 0.7993441709580587 | T | T | T |
| 0.1810333105536111 | 0.0550014032957023 | 0.6551700533223683 | T | T | T |
| 0.4202160073502469 | 0.8260675734208204 | 0.6671810717978207 | T | T | T |
| 0.3049370330367807 | 0.8672810577753711 | 0.8095066190231408 | T | T | T |
| 0.2664271640313789 | 0.8269406217032967 | 0.0268223286225902 | T | T | T |
| 0.1120832714365616 | 0.8254746289974899 | 0.0088339740683553 | T | T | T |
| 0.0665513808223774 | 0.8725820867121192 | 0.7954119358023127 | T | T | T |
| 0.1843259051127119 | 0.8278179176710542 | 0.6697275836377192 | T | T | T |
| 0.0772433284238064 | 0.9414081207150388 | 0.1455846523768564 | T | T | T |
| 0.1958543119862939 | 0.9711274099500958 | 0.2901174903736755 | T | T | T |
| 0.2200855818926548 | 0.9376039143020319 | 0.5115059204639297 | T | T | T |
| 0.3795409924432102 | 0.9349870013027706 | 0.5110839110884396 | T | T | T |
| 0.4328066934997769 | 0.9679604377279782 | 0.2988947746936491 | T | T | T |
| 0.3208038455941585 | 0.9419410232975277 | 0.1560286896668877 | T | T | T |
| 0.0813036366382971 | 0.1725549875185322 | 0.1651634905321259 | T | T | T |
| 0.1959782859522301 | 0.1290830107619653 | 0.3073684505755517 | T | T | T |
| 0.2344833063876027 | 0.1702177932698493 | 0.5243217395146986 | T | T | T |
| 0.3891698862612279 | 0.1728808539403271 | 0.5101530752001732 | T | T | T |
| 0.4370895886230983 | 0.1261481864515873 | 0.2972271902094843 | T | T | T |
| 0.3177907052053255 | 0.1690314747324751 | 0.1712168334801231 | T | T | T |
| 0.5774695079203310 | 0.5550401976591585 | 0.3487433109361096 | T | T | T |
| 0.6942513778003400 | 0.5239783184100122 | 0.1974229504565240 | T | T | T |
| 0.7153213938939325 | 0.5675284994894120 | 0.9813677180220582 | T | T | T |
| 0.8729418373569175 | 0.5721647880354931 | 0.9823740465415013 | T | T | T |
| 0.8059904167009651 | 0.5526750758433479 | 0.3451704711194151 | T | T | T |
| 0.5746982696335777 | 0.3267727396932692 | 0.3266049073365770 | T | T | T |
| 0.6950961586496751 | 0.3698693957919627 | 0.1857373714636337 | T | T | T |
| 0.7305388439979142 | 0.3257350757707426 | 0.9735518745832760 | T | T | T |
| 0.8853355644995539 | 0.3254788786115747 | 0.9940218674077882 | T | T | T |
| 0.9386039888765318 | 0.3742962383295530 | 0.1944625706611994 | T | T | T |
| 0.9210725124804187 | 0.4442264743230695 | 0.8599811664698928 | T | T | T |
| 0.8017511998731007 | 0.4700096414752803 | 0.7161688124825336 | T | T | T |
| 0.7734628192552591 | 0.4348319556823328 | 0.4920011019173611 | T | T | T |
| 0.6140157219201723 | 0.4295674684309677 | 0.4869301910409994 | T | T | T |
| 0.5654429550584773 | 0.4687721739339824 | 0.7004894351665518 | T | T | T |
| 0.6765898632135527 | 0.4475795008851300 | 0.8508606865923780 | T | T | T |
| 0.9204614867869840 | 0.6763989610915874 | 0.8245428349889501 | T | T | T |
| 0.7628989085594879 | 0.6702416332427633 | 0.4652455519252536 | T | T | T |
| 0.6093233048212816 | 0.6730500719665417 | 0.4839406754386558 | T | T | T |
| 0.5587547867971671 | 0.6271710411271330 | 0.6959184644365070 | T | T | T |
| 0.6785677947714023 | 0.6700926868159225 | 0.8181625059783604 | T | T | T |
| 0.5778628853718111 | 0.9438166026501229 | 0.3534352861653730 | T | T | T |
| 0.6984161655578817 | 0.9704151886370278 | 0.2089016122133351 | T | T | T |
| 0.7220494774854593 | 0.9322045460941529 | 0.9886398849860631 | T | T | T |

**Structure files (CONTCAR) involved in this work:**

|                    |                    |                    |   |   |   |
|--------------------|--------------------|--------------------|---|---|---|
| 0.8823772543335086 | 0.9325791749660619 | 0.9909505806235058 | T | T | T |
| 0.9328568674985930 | 0.9682445004493657 | 0.2022189270336920 | T | T | T |
| 0.8221504719818002 | 0.9446120952826380 | 0.3504891769564931 | T | T | T |
| 0.5803478930394822 | 0.1711436576510538 | 0.3278270239208045 | T | T | T |
| 0.6989694737406649 | 0.1278046432477817 | 0.1888533169585535 | T | T | T |
| 0.7335087455853557 | 0.1700796999409229 | 0.9694927027803466 | T | T | T |
| 0.8886325146039386 | 0.1729814233085715 | 0.9831103018753348 | T | T | T |
| 0.9372952151412800 | 0.1263196247352028 | 0.1964202231599441 | T | T | T |
| 0.8200494791032222 | 0.1688765484795901 | 0.3259945725124209 | T | T | T |
| 0.9249197740042867 | 0.0545757420431001 | 0.8543120251090703 | T | T | T |
| 0.8050899883835557 | 0.0250421755138305 | 0.7062037048062544 | T | T | T |
| 0.7824028549854706 | 0.0635621006762404 | 0.4892025782100007 | T | T | T |
| 0.6220893894107495 | 0.0674464984376032 | 0.4878193413010221 | T | T | T |
| 0.5696206583929472 | 0.0293084102123652 | 0.6979035071125336 | T | T | T |
| 0.6813963346867808 | 0.0500042689674112 | 0.8463208603401291 | T | T | T |
| 0.9248203115150319 | 0.8289068314449589 | 0.8307816901566363 | T | T | T |
| 0.8042419214289357 | 0.8688090098566870 | 0.6905309267172403 | T | T | T |
| 0.7672050135211820 | 0.8265281727307099 | 0.4743750250938311 | T | T | T |
| 0.6131251585679343 | 0.8265100305896175 | 0.4873493232061323 | T | T | T |
| 0.5646771815077258 | 0.8719519082365186 | 0.6976102639606526 | T | T | T |
| 0.6821979005947990 | 0.8296178532892498 | 0.8263236987704263 | T | T | T |
| 0.4218600672697581 | 0.4428594745741565 | 0.6422532517493957 | T | T | T |
| 0.3023815810768439 | 0.4710795941764033 | 0.7871461185153289 | T | T | T |
| 0.2794960018307587 | 0.4361368994777986 | 0.0071571690508919 | T | T | T |
| 0.1210758262272978 | 0.4353227385950149 | 0.0095687763226293 | T | T | T |
| 0.0655821563761374 | 0.4685660705909834 | 0.7972707980131939 | T | T | T |
| 0.1772408602549032 | 0.4434256643432415 | 0.6526090812384817 | T | T | T |
| 0.4171584629976953 | 0.6724063500921379 | 0.6616504207232955 | T | T | T |
| 0.3010181428986393 | 0.6289943416042413 | 0.8030132696604170 | T | T | T |
| 0.2663418600407753 | 0.6698009787393954 | 0.0210506058094316 | T | T | T |
| 0.1119588506753801 | 0.6715630132946289 | 0.0055902266619962 | T | T | T |
| 0.0629506639909866 | 0.6272199821663320 | 0.7931308753588396 | T | T | T |
| 0.1806027127135584 | 0.6690159889357474 | 0.6665810861657810 | T | T | T |
| 0.0743169688059861 | 0.5568958370471374 | 0.1462261378653315 | T | T | T |
| 0.1954150374865059 | 0.5267434347404100 | 0.2858612004059520 | T | T | T |
| 0.2180436831057422 | 0.5607940752265314 | 0.5089758852872419 | T | T | T |
| 0.3778371158474995 | 0.5651626756234402 | 0.5074383348697211 | T | T | T |
| 0.4309637982198767 | 0.5280242972710666 | 0.2958567279399001 | T | T | T |
| 0.3209589831276441 | 0.5526805163251067 | 0.1496106336770554 | T | T | T |
| 0.0826095343661553 | 0.3260697714455097 | 0.1605266494021362 | T | T | T |
| 0.1952541183487938 | 0.3688347356119925 | 0.3055783728545713 | T | T | T |
| 0.2327523021859648 | 0.3283029358294360 | 0.5232099935203453 | T | T | T |
| 0.3871554351697333 | 0.3266041082100658 | 0.5052837837663218 | T | T | T |
| 0.4329796494751405 | 0.3700854597337335 | 0.2906534893222277 | T | T | T |
| 0.3141420771503757 | 0.3276315370308841 | 0.1662209590995440 | T | T | T |
| 0.9267579678700392 | 0.5336631235330935 | 0.1916212030522492 | T | T | T |
| 0.8183314465279993 | 0.3300622069728247 | 0.3229065511286150 | T | T | T |
| 0.8041464014101688 | 0.6323877597057190 | 0.6815103167294519 | T | T | T |
| 0.3592724223849054 | 0.0607428536143631 | 0.7175291921292679 | T | T | T |
| 0.3074060361029530 | 0.0645239127535042 | 0.8975503095287242 | T | T | T |
| 0.2022747818921116 | 0.0481817080956233 | 0.0185311097470922 | T | T | T |
| 0.0990511584555513 | 0.0695621138647680 | 0.8962226381344234 | T | T | T |
| 0.1055439153680130 | 0.0587388652848329 | 0.6989300989756114 | T | T | T |

**Structure files (CONTCAR) involved in this work:**

|                    |                    |                    |   |   |   |
|--------------------|--------------------|--------------------|---|---|---|
| 0.2307864367896636 | 0.0314368430254384 | 0.7445356889818495 | T | T | T |
| 0.3607564932293035 | 0.8251319983152806 | 0.7490855161347618 | T | T | T |
| 0.3066853989899491 | 0.8420675465795167 | 0.9242346995466258 | T | T | T |
| 0.1893018239784626 | 0.8511403217773869 | 0.0131811587797800 | T | T | T |
| 0.0855464639538066 | 0.8299776516614331 | 0.8947806019605111 | T | T | T |
| 0.1067017114922778 | 0.8421165284883259 | 0.6996539389326850 | T | T | T |
| 0.2313359004042921 | 0.8534610497628587 | 0.7616401318585778 | T | T | T |
| 0.3235733075765084 | 0.9466011485856497 | 0.8041167894985081 | T | T | T |
| 0.0876448120293254 | 0.9504114338899770 | 0.8128871955053095 | T | T | T |
| 0.4326309887837916 | 0.1273246943311020 | 0.5866447067385605 | T | T | T |
| 0.4191678841095836 | 0.9958323628190447 | 0.5659366785105058 | T | T | T |
| 0.3955168221075978 | 0.8643820370200118 | 0.5665627114677317 | T | T | T |
| 0.2014720869586568 | 0.1291869737893767 | 0.6162180430383309 | T | T | T |
| 0.1827821070157936 | 0.0007739945340931 | 0.5643792843175641 | T | T | T |
| 0.2025745382082396 | 0.8672248190307854 | 0.5670308029966015 | T | T | T |
| 0.9906664090941404 | 0.0408582371583258 | 0.7866857318102705 | T | T | T |
| 0.9867122556197406 | 0.8668792430728152 | 0.7744201559322765 | T | T | T |
| 0.1430884867018426 | 0.9348025531977388 | 0.2156936162486558 | T | T | T |
| 0.1937332971643372 | 0.9326387787922904 | 0.3970624824641202 | T | T | T |
| 0.3000809340470066 | 0.9510640189630656 | 0.5153258007233109 | T | T | T |
| 0.4046287150102814 | 0.9284976155150703 | 0.3965671834562517 | T | T | T |
| 0.3962767756821047 | 0.9390499506295928 | 0.1996050603099213 | T | T | T |
| 0.2709312834883942 | 0.9661434354537455 | 0.2450054915021893 | T | T | T |
| 0.1415304697425265 | 0.1726885629208444 | 0.2460599713554243 | T | T | T |
| 0.1939302641211844 | 0.1541424167272426 | 0.4222703022961526 | T | T | T |
| 0.3119033943467996 | 0.1471623858797168 | 0.5104236158153730 | T | T | T |
| 0.4187745904623210 | 0.1675055168790978 | 0.3979973465856483 | T | T | T |
| 0.3954727027915759 | 0.1580296714742083 | 0.2038326839599064 | T | T | T |
| 0.2703340756086495 | 0.1411038889106804 | 0.2612795756585488 | T | T | T |
| 0.1760121391088159 | 0.0499718778679532 | 0.3017601747331509 | T | T | T |
| 0.4170989829832186 | 0.0477055540147293 | 0.3118103508463721 | T | T | T |
| 0.0674849233284789 | 0.8722235851733495 | 0.0825506961633793 | T | T | T |
| 0.0830236952175947 | 0.0037487561262719 | 0.0675065815465043 | T | T | T |
| 0.1056370840372647 | 0.1352149831334230 | 0.0636959711217108 | T | T | T |
| 0.3004509154268375 | 0.8673763280127036 | 0.1184784338470491 | T | T | T |
| 0.3186782620111060 | 0.9949443317850352 | 0.0637174792224024 | T | T | T |
| 0.3028216760500014 | 0.1288182350744729 | 0.0681911113774786 | T | T | T |
| 0.5122116864821505 | 0.9549259220781390 | 0.2845078543670834 | T | T | T |
| 0.5169189100593546 | 0.1328725614086474 | 0.2762084959329477 | T | T | T |
| 0.6416736911554726 | 0.5571157496497529 | 0.2751124143020574 | T | T | T |
| 0.7010741863196500 | 0.5726624978259794 | 0.1010129836476486 | T | T | T |
| 0.7942429620444396 | 0.5573668676108620 | 0.9573077263673243 | T | T | T |
| 0.8862377411960192 | 0.5781875908531287 | 0.0998568207435658 | T | T | T |
| 0.8872291774244868 | 0.5536491751144962 | 0.3144268452120978 | T | T | T |
| 0.7672476526127466 | 0.5189546837796699 | 0.2533560645604458 | T | T | T |
| 0.6415543019086152 | 0.3348684103559545 | 0.2607591772864998 | T | T | T |
| 0.6895908658476159 | 0.3324960701863171 | 0.0775704838083050 | T | T | T |
| 0.8077844133270919 | 0.3495486175817283 | 0.9895764145197856 | T | T | T |
| 0.9104699183079655 | 0.3227280589937267 | 0.1098816148977564 | T | T | T |
| 0.9066768670078567 | 0.3514511988818633 | 0.3050040533501044 | T | T | T |
| 0.7688617919525181 | 0.3648632781862978 | 0.2319080816425957 | T | T | T |
| 0.6726110671127647 | 0.4482856467008123 | 0.1681136061034677 | T | T | T |
| 0.9149430634357539 | 0.4491433385715648 | 0.1733286460734408 | T | T | T |

**Structure files (CONTCAR) involved in this work:**

|                    |                    |                    |   |   |   |
|--------------------|--------------------|--------------------|---|---|---|
| 0.5696146586385816 | 0.6274658880851012 | 0.4028806801082769 | T | T | T |
| 0.5870400409881886 | 0.4977760506339162 | 0.4345335739708294 | T | T | T |
| 0.5823387397224742 | 0.3636766397594294 | 0.4348705169746753 | T | T | T |
| 0.7854544624581410 | 0.6298814897105688 | 0.3637747757773709 | T | T | T |
| 0.7980648048676552 | 0.5093007765697887 | 0.4493682404499476 | T | T | T |
| 0.8175645251011255 | 0.3782807898340133 | 0.4356172272991224 | T | T | T |
| 0.0094572341736011 | 0.5523915310141374 | 0.2162181179504202 | T | T | T |
| 0.0190692518990447 | 0.3668037148480359 | 0.2059796891909661 | T | T | T |
| 0.8560507377677398 | 0.4329503823779932 | 0.7866593236645304 | T | T | T |
| 0.7947517137325566 | 0.4303617702138378 | 0.6095818029252312 | T | T | T |
| 0.6949886864888107 | 0.4258898897586042 | 0.4737065045837231 | T | T | T |
| 0.5956052343429756 | 0.4288883525217456 | 0.6042672232126715 | T | T | T |
| 0.6033659798026387 | 0.4423388354843724 | 0.8001606745674561 | T | T | T |
| 0.7295432458915730 | 0.4761578809652971 | 0.7668828871791926 | T | T | T |
| 0.8620401533555931 | 0.6789272064076081 | 0.7440111897996772 | T | T | T |
| 0.8135280686962982 | 0.6494266801678449 | 0.5536997686836945 | T | T | T |
| 0.6868334430291074 | 0.6481838440310702 | 0.4925737003450968 | T | T | T |
| 0.5748281920999736 | 0.6664238670572981 | 0.5923402935194214 | T | T | T |
| 0.5997388165497984 | 0.6611579268960576 | 0.7873155900319826 | T | T | T |
| 0.7254764760803473 | 0.6370464444384790 | 0.7333170408923374 | T | T | T |
| 0.8349594010344582 | 0.5439690866675631 | 0.6821263931694963 | T | T | T |
| 0.5786854309712859 | 0.5484031846607927 | 0.6842801647626738 | T | T | T |
| 0.9304890289932884 | 0.3774545837353843 | 0.9285472812991491 | T | T | T |
| 0.9138869510253471 | 0.5095421000770810 | 0.9306542803132841 | T | T | T |
| 0.8972588116651942 | 0.6409076654169222 | 0.9282793926437101 | T | T | T |
| 0.6981732026474056 | 0.3731465933044754 | 0.8873109565935978 | T | T | T |
| 0.6751049393492455 | 0.5011380171799089 | 0.9418181244187307 | T | T | T |
| 0.6884776774970472 | 0.6351442342961808 | 0.9278057099373775 | T | T | T |
| 0.4865167920350861 | 0.4524737934333854 | 0.7142477061257099 | T | T | T |
| 0.4787750837754582 | 0.6335728608545084 | 0.7165456843822745 | T | T | T |
| 0.6428434591102904 | 0.9371967937551835 | 0.2818814672142281 | T | T | T |
| 0.7007319913776270 | 0.9278877740993058 | 0.1054342307214704 | T | T | T |
| 0.8023824129365954 | 0.9409538670488948 | 0.9765796547240241 | T | T | T |
| 0.9016352818591842 | 0.9267964658032773 | 0.1083363971359669 | T | T | T |
| 0.8974927161738797 | 0.9446403983667769 | 0.3055889531872527 | T | T | T |
| 0.7712044081984868 | 0.9667449555620363 | 0.2619760747864746 | T | T | T |
| 0.6433631562304847 | 0.1686358065400630 | 0.2523052536949216 | T | T | T |
| 0.6973820523089306 | 0.1578695762352982 | 0.0763157553470547 | T | T | T |
| 0.8114534925110147 | 0.1474732298245160 | 0.9787123778803586 | T | T | T |
| 0.9161204483046640 | 0.1670946767840555 | 0.0963611528492203 | T | T | T |
| 0.8976678000842727 | 0.1559887200425529 | 0.2924125351164475 | T | T | T |
| 0.7725247239741949 | 0.1370884485879532 | 0.2380310225851414 | T | T | T |
| 0.6795099774954935 | 0.0484059543416076 | 0.1867704320010542 | T | T | T |
| 0.9197455652357290 | 0.0474385184693371 | 0.1814477787304520 | T | T | T |
| 0.5681480492271397 | 0.8747614474779040 | 0.4168204504756375 | T | T | T |
| 0.5843790694654390 | 0.0056561783364537 | 0.4321172951966271 | T | T | T |
| 0.6003325192168204 | 0.1373718655872817 | 0.4344359114254486 | T | T | T |
| 0.8062488409180139 | 0.8692085846314558 | 0.3897496015491797 | T | T | T |
| 0.8173579003306934 | 0.9963431261336457 | 0.4438524774513357 | T | T | T |
| 0.8071446150027342 | 0.1299954863779588 | 0.4311631824525061 | T | T | T |
| 0.0120591990576713 | 0.9526706826458083 | 0.2155541373157565 | T | T | T |
| 0.0171472432225738 | 0.1352114838710958 | 0.2147956414811420 | T | T | T |
| 0.8598840768600977 | 0.0553739941026225 | 0.7826526985121403 | T | T | T |

**Structure files (CONTCAR) involved in this work:**

|                    |                     |                    |   |   |   |
|--------------------|---------------------|--------------------|---|---|---|
| 0.8042059523850669 | 0.0707033333305085  | 0.6056828532938877 | T | T | T |
| 0.7019052900007292 | 0.0555420068305908  | 0.4786068006290684 | T | T | T |
| 0.5997198814579667 | 0.0718351291165609  | 0.6041956773684203 | T | T | T |
| 0.6061161426953187 | 0.0499880942372697  | 0.8015633355425973 | T | T | T |
| 0.7317865172731306 | 0.0268613220639412  | 0.7576605995195962 | T | T | T |
| 0.8596740304559911 | 0.8326207010784104  | 0.7594957886133323 | T | T | T |
| 0.8046150367290893 | 0.8324099024121751  | 0.5817616988168389 | T | T | T |
| 0.6904015747897811 | 0.8526273132471154  | 0.4842529701874061 | T | T | T |
| 0.5869655196996133 | 0.8270606776976949  | 0.6018623334130716 | T | T | T |
| 0.6050565668254195 | 0.8467995039856235  | 0.7961629284988314 | T | T | T |
| 0.7305445665557856 | 0.8619347103899795  | 0.7405488419123722 | T | T | T |
| 0.8230863295318945 | 0.9477759396745158  | 0.6775029962992711 | T | T | T |
| 0.5813202332571591 | 0.9501044288579661  | 0.6737473342839368 | T | T | T |
| 0.9332216667002466 | 0.1275386605531338  | 0.9077015267143531 | T | T | T |
| 0.9189016644329330 | 0.9974867238655322  | 0.9409903478245186 | T | T | T |
| 0.9086532740760302 | 0.8644809201560754  | 0.9373976579829228 | T | T | T |
| 0.6979492228310107 | 0.1257209981898833  | 0.8832893505774754 | T | T | T |
| 0.6861348216721143 | -0.0023115177738859 | 0.9393288529021115 | T | T | T |
| 0.6985113018219911 | 0.8630996910965687  | 0.9345094750073047 | T | T | T |
| 0.4908328088730761 | 0.0454517593265694  | 0.7143163374244060 | T | T | T |
| 0.4849837965874103 | 0.8627317604679087  | 0.7164263717974118 | T | T | T |
| 0.3551495345152666 | 0.4368339664324226  | 0.7104739782878335 | T | T | T |
| 0.3050047642330417 | 0.4303627664181177  | 0.8922810011890203 | T | T | T |
| 0.2001739486032394 | 0.4538151914453849  | 0.0116365012400196 | T | T | T |
| 0.0945160644466235 | 0.4306720871037673  | 0.8953958328539641 | T | T | T |
| 0.1015849402465671 | 0.4401469658386920  | 0.6969205760327724 | T | T | T |
| 0.2272359586757985 | 0.4664329191874015  | 0.7420768382757517 | T | T | T |
| 0.3532882407328883 | 0.6710935031755398  | 0.7357570998914065 | T | T | T |
| 0.3045950633988562 | 0.6585162959079145  | 0.9154961318101128 | T | T | T |
| 0.1891566673395157 | 0.6458397340893079  | 0.0089304991912792 | T | T | T |
| 0.0857039041251395 | 0.6692118141045633  | 0.8911175713134589 | T | T | T |
| 0.1024267871179808 | 0.6567812794930072  | 0.6957356704442640 | T | T | T |
| 0.2261546408216270 | 0.6388351167803988  | 0.7572269528528889 | T | T | T |
| 0.3212245721586433 | 0.5498461740949947  | 0.8033891795980511 | T | T | T |
| 0.0808475255539201 | 0.5483209376700654  | 0.8082256685916375 | T | T | T |
| 0.4318618403563994 | 0.3748474299001296  | 0.5766077576150170 | T | T | T |
| 0.4182094994577794 | 0.5061375022929959  | 0.5655527600065829 | T | T | T |
| 0.3970456724250203 | 0.6372126831725432  | 0.5561821446003294 | T | T | T |
| 0.1975018636936723 | 0.3691138154773160  | 0.6135765479281136 | T | T | T |
| 0.1805536826434102 | 0.4973558247749709  | 0.5613271160705181 | T | T | T |
| 0.1969152250367379 | 0.6311065374674342  | 0.5619070740168545 | T | T | T |
| 0.9854699277203786 | 0.4540347611603212  | 0.7864660111366500 | T | T | T |
| 0.9833138325156801 | 0.6348431192306379  | 0.7745865172348843 | T | T | T |
| 0.1420569504683148 | 0.5636362409933063  | 0.2135064896346066 | T | T | T |
| 0.1950208384688755 | 0.5649693725799921  | 0.3930860897834629 | T | T | T |
| 0.2983765401920662 | 0.5499921831542111  | 0.5180798507306258 | T | T | T |
| 0.4004625002083470 | 0.5678970994710157  | 0.3914388028540811 | T | T | T |
| 0.3961637143140320 | 0.5559288217528949  | 0.1946724746609364 | T | T | T |
| 0.2699833160323705 | 0.5308454113356696  | 0.2385031271826002 | T | T | T |
| 0.1407511237573994 | 0.3253925085709432  | 0.2444143916769679 | T | T | T |
| 0.1927897370118735 | 0.3432175937867614  | 0.4201939705860710 | T | T | T |
| 0.3099376139672010 | 0.3524703839977008  | 0.5099286376460962 | T | T | T |
| 0.4129596038244667 | 0.3279877393781236  | 0.3904017302515089 | T | T | T |

**Structure files (CONTCAR) involved in this work:**

|                    |                    |                    |   |   |   |
|--------------------|--------------------|--------------------|---|---|---|
| 0.3918758221874523 | 0.3424126102431072 | 0.1942324429605073 | T | T | T |
| 0.2691819864804607 | 0.3559475896380704 | 0.2588384745432337 | T | T | T |
| 0.1755920462771897 | 0.4479452409880191 | 0.2996218204067483 | T | T | T |
| 0.4155999925140840 | 0.4485259769618052 | 0.3106966007413337 | T | T | T |
| 0.0672849428659301 | 0.6238814697074316 | 0.0766315259008550 | T | T | T |
| 0.0800666399018848 | 0.4918685344618855 | 0.0715766303598225 | T | T | T |
| 0.1092079548529333 | 0.3616064144964595 | 0.0588389585158894 | T | T | T |
| 0.3022154430791627 | 0.6266104386127653 | 0.1080871358738202 | T | T | T |
| 0.3198261879731455 | 0.4972648718162905 | 0.0604161343897952 | T | T | T |
| 0.2940786106434420 | 0.3649700556940262 | 0.0625171101759367 | T | T | T |
| 0.5107723299057541 | 0.5400957583417029 | 0.2842370823629431 | T | T | T |
| 0.5120150202445153 | 0.3601835102068696 | 0.2668288423551011 | T | T | T |
| 0.4380940504119782 | 0.7493052965405671 | 0.6371602397081328 | T | T | T |
| 0.1954059832450513 | 0.7482650926732300 | 0.6498060336637004 | T | T | T |
| 0.2701470550392434 | 0.7478920560867577 | 0.0540329923468061 | T | T | T |
| 0.1063165892011850 | 0.7482429243130452 | 0.0464426744865814 | T | T | T |
| 0.0620322045028387 | 0.2491986317516057 | 0.1353119461917418 | T | T | T |
| 0.3025409308148541 | 0.2477992103247715 | 0.1507203217916934 | T | T | T |
| 0.2294367736597127 | 0.2493263734054249 | 0.5510452044715790 | T | T | T |
| 0.3933510895794000 | 0.2503808479960129 | 0.5470370911869946 | T | T | T |
| 0.5602279528749504 | 0.2484493408505623 | 0.3495536244322755 | T | T | T |
| 0.8058629984841348 | 0.2468486480452422 | 0.3429266802292085 | T | T | T |
| 0.7273719224199384 | 0.2483112205338114 | 0.9357722814722778 | T | T | T |
| 0.8937185170415689 | 0.2507935979797633 | 0.9469345500843800 | T | T | T |
| 0.9456182758976800 | 0.7518655219730247 | 0.8530177502048227 | T | T | T |
| 0.6941879439381089 | 0.7496778020130339 | 0.8332863432459597 | T | T | T |
| 0.7685367632477421 | 0.7490486315193325 | 0.4371678617169596 | T | T | T |
| 0.6068758243701395 | 0.7502454172707222 | 0.4455396920606699 | T | T | T |
| 0.9550899684958660 | 0.4726034284773477 | 0.5026186425443518 | T | T | T |
| 0.9428482019211549 | 0.6327293023630104 | 0.4332867086327201 | T | T | T |
| 0.9198891608987342 | 0.4106903689346336 | 0.4189073176846362 | T | T | T |
| 0.9004505948338024 | 0.5175069836462628 | 0.5841660800504547 | T | T | T |
| 0.9143086275118524 | 0.5868831949258102 | 0.3637573971912240 | T | T | T |
| 0.0212785263671792 | 0.6455728948074314 | 0.3363743763129970 | T | T | T |
| 0.0290445536407693 | 0.6916780367223941 | 0.4512322576689278 | T | T | T |
| 0.9722189672911370 | 0.7200124457039265 | 0.3547938510412234 | T | T | T |
| 0.9095788354044090 | 0.6588313278925555 | 0.4707182019439903 | T | T | T |
| 0.9946682888129916 | 0.6761022354933681 | 0.3916647818010092 | T | T | T |

**Figure 2(a) Zn-TS**

1.0000000000000000

20.0219993591000005 0.0000000000000000 0.0000000000000000

0.0000000000000000 19.8990001678000006 0.0000000000000000

0.0000000000000000 0.0000000000000000 13.3830003737999998

93 3 194 2 5 1

## Selective dynamics

## Direct

|                    |                    |                    |   |   |   |
|--------------------|--------------------|--------------------|---|---|---|
| 0.4248002841479378 | 0.0561787980228706 | 0.6445286540159375 | T | T | T |
| 0.3037717690835264 | 0.0249286850886851 | 0.7880209903831334 | T | T | T |
| 0.2827624913990209 | 0.0604132097444172 | 0.0091430336020337 | T | T | T |
| 0.1236261204619822 | 0.0619263950848340 | 0.0088326711899738 | T | T | T |
| 0.0715791046536861 | 0.0282913195497205 | 0.7971190062031218 | T | T | T |
| 0.1798042473865757 | 0.0537444538305901 | 0.6489302708362397 | T | T | T |
| 0.4210580746670016 | 0.8266028093578505 | 0.6643412783243604 | T | T | T |

**Structure files (CONTCAR) involved in this work:**

|                    |                    |                    |   |   |   |
|--------------------|--------------------|--------------------|---|---|---|
| 0.3039229220954947 | 0.8668552225458508 | 0.8070594929168727 | T | T | T |
| 0.2660089902017638 | 0.8260961329926996 | 0.0246354240026420 | T | T | T |
| 0.1115428339754841 | 0.8245005376523651 | 0.0095869187503773 | T | T | T |
| 0.0659754889004069 | 0.8715323803284448 | 0.7959950914782086 | T | T | T |
| 0.1827221030298663 | 0.8276722062168598 | 0.6676460030124193 | T | T | T |
| 0.0768118218007509 | 0.9409298097976933 | 0.1440838965750843 | T | T | T |
| 0.1971294032518538 | 0.9710562092174979 | 0.2873034497923145 | T | T | T |
| 0.2196420413362499 | 0.9365800922395223 | 0.5085859935138171 | T | T | T |
| 0.3790964423692761 | 0.9350204851523090 | 0.5091941092869150 | T | T | T |
| 0.4314691379732871 | 0.9686639741983158 | 0.2970716235445233 | T | T | T |
| 0.3217837488826313 | 0.9433852294182863 | 0.1495323345533656 | T | T | T |
| 0.0810133808998040 | 0.1699629178799179 | 0.1624693956903639 | T | T | T |
| 0.1966682290662097 | 0.1282665794871274 | 0.3060428625212615 | T | T | T |
| 0.2339594373693336 | 0.1710603458549811 | 0.5228951581668716 | T | T | T |
| 0.3886701932195338 | 0.1732700737021242 | 0.5105490076825304 | T | T | T |
| 0.4365368932680915 | 0.1269529795626248 | 0.2968544497085397 | T | T | T |
| 0.3178037728032618 | 0.1687684860664948 | 0.1692475260601216 | T | T | T |
| 0.5748863435336365 | 0.5555884947733098 | 0.3504267721661996 | T | T | T |
| 0.6899445314124126 | 0.5260088022193057 | 0.2015643898840244 | T | T | T |
| 0.7158008483420046 | 0.5682888547597037 | 0.9838252913223118 | T | T | T |
| 0.8732339402247005 | 0.5733578257240861 | 0.9858347409118013 | T | T | T |
| 0.8100355500942845 | 0.5485331947791066 | 0.3504927759117116 | T | T | T |
| 0.5739978144113767 | 0.3277454529489571 | 0.3274149966915316 | T | T | T |
| 0.6943037268533971 | 0.3718441712686838 | 0.1882601691425537 | T | T | T |
| 0.7312774021873103 | 0.3266615696520597 | 0.9759930424278140 | T | T | T |
| 0.8861746463124079 | 0.3245718762495398 | 0.9947161901805568 | T | T | T |
| 0.9428391268618200 | 0.3745990145832317 | 0.1884350431080372 | T | T | T |
| 0.9205194159998749 | 0.4445979509080119 | 0.8636101793065429 | T | T | T |
| 0.8017116768440342 | 0.4694813111118658 | 0.7185928562915841 | T | T | T |
| 0.7749183452918514 | 0.4345144949543713 | 0.4968158452639476 | T | T | T |
| 0.6161924029854575 | 0.4293728038446171 | 0.4877343076100344 | T | T | T |
| 0.5666295743339551 | 0.4692762172211949 | 0.7014791835860195 | T | T | T |
| 0.6769803143712237 | 0.4475210425518250 | 0.8525754007307310 | T | T | T |
| 0.9204559833557417 | 0.6761648871483514 | 0.8290710300228922 | T | T | T |
| 0.7689753710114122 | 0.6694913053080624 | 0.4628818014906259 | T | T | T |
| 0.6137456012834779 | 0.6720567895461744 | 0.4804917856991476 | T | T | T |
| 0.5625827319601260 | 0.6276841864775181 | 0.6942731035647447 | T | T | T |
| 0.6753141437917360 | 0.6702590832983237 | 0.8242809830732090 | T | T | T |
| 0.5772365440659420 | 0.9439795895964165 | 0.3540300453727424 | T | T | T |
| 0.6978943515953143 | 0.9716247017409650 | 0.2094938097312782 | T | T | T |
| 0.7206096589847603 | 0.9339298113420191 | 0.9889399319502566 | T | T | T |
| 0.8807240920668782 | 0.9326423646381758 | 0.9904748852048093 | T | T | T |
| 0.9321823504408112 | 0.9684326557443325 | 0.2002910035668777 | T | T | T |
| 0.8224188043739505 | 0.9461078552756356 | 0.3499654939812925 | T | T | T |
| 0.5793508905423814 | 0.1724216974869030 | 0.3280850602403387 | T | T | T |
| 0.6990171187358436 | 0.1298859586336433 | 0.1907078623077205 | T | T | T |
| 0.7332914564248960 | 0.1706551445174485 | 0.9704724418556394 | T | T | T |
| 0.8881509118902567 | 0.1725771890742443 | 0.9827050578271112 | T | T | T |
| 0.9365830425635732 | 0.1258444182902451 | 0.1955983678544210 | T | T | T |
| 0.8213648311529729 | 0.1721407896433446 | 0.3271455121913741 | T | T | T |
| 0.9251973420045171 | 0.0539001099796024 | 0.8537165484466617 | T | T | T |
| 0.8046120146265208 | 0.0251120467594978 | 0.7054926065949666 | T | T | T |
| 0.7819738889390084 | 0.0661240517366742 | 0.4877648583363594 | T | T | T |

**Structure files (CONTCAR) involved in this work:**

|                    |                    |                    |   |   |   |
|--------------------|--------------------|--------------------|---|---|---|
| 0.6218082108234647 | 0.0680458316114708 | 0.4867529721982677 | T | T | T |
| 0.5700858411596521 | 0.0291809986844243 | 0.6967585843815960 | T | T | T |
| 0.6807291447769004 | 0.0513866214652818 | 0.8466734860725280 | T | T | T |
| 0.9236588145084103 | 0.8289083159004544 | 0.8308530109309588 | T | T | T |
| 0.8035635539681942 | 0.8681308132178206 | 0.6895821995467698 | T | T | T |
| 0.7685968927837419 | 0.8256575687022052 | 0.4727613217360693 | T | T | T |
| 0.6141718614480908 | 0.8257680396491242 | 0.4863184486597666 | T | T | T |
| 0.5654593635229830 | 0.8717164441227864 | 0.6966591741973738 | T | T | T |
| 0.6817554915829439 | 0.8294136273614627 | 0.8276837971555284 | T | T | T |
| 0.4217667297318859 | 0.4435467822206581 | 0.6434631316515448 | T | T | T |
| 0.3011203833823127 | 0.4712923767094320 | 0.7866312454186741 | T | T | T |
| 0.2778616988315387 | 0.4357119957604074 | 0.0075394638372603 | T | T | T |
| 0.1199866185885443 | 0.4350288530837534 | 0.0119124115098028 | T | T | T |
| 0.0648408357640200 | 0.4692585181859352 | 0.7985216926612043 | T | T | T |
| 0.1751250391410209 | 0.4439229524431194 | 0.6514339195131065 | T | T | T |
| 0.4179211212396088 | 0.6724135319996808 | 0.6583728930400242 | T | T | T |
| 0.3021733780906251 | 0.6288579144686027 | 0.8017813668954590 | T | T | T |
| 0.2654815752554169 | 0.6696569037760807 | 0.0206256208455051 | T | T | T |
| 0.1113211090009436 | 0.6707354184587884 | 0.0061912479495835 | T | T | T |
| 0.0621416269035298 | 0.6279063240628869 | 0.7928287286169855 | T | T | T |
| 0.1802767419695073 | 0.6692877956627690 | 0.6642699172597684 | T | T | T |
| 0.0722404837613220 | 0.5561042053792472 | 0.1465144321394194 | T | T | T |
| 0.1945029949980496 | 0.5247002359751447 | 0.2843582342359692 | T | T | T |
| 0.2144812955968319 | 0.5603492731549270 | 0.5088719813584734 | T | T | T |
| 0.3734892719222958 | 0.5649891542884597 | 0.5094467996011564 | T | T | T |
| 0.4260221196877475 | 0.5260866544139786 | 0.2992352446279898 | T | T | T |
| 0.3205792390757057 | 0.5518122033711145 | 0.1471781954804477 | T | T | T |
| 0.0845596131465363 | 0.3229820706058666 | 0.1595308806307613 | T | T | T |
| 0.1963052729292860 | 0.3672996370756045 | 0.3042766069777066 | T | T | T |
| 0.2322650384564455 | 0.3283532190730337 | 0.5230320831618952 | T | T | T |
| 0.3866958142648203 | 0.3268109692041107 | 0.5061871043958365 | T | T | T |
| 0.4316920196287065 | 0.3690693427032218 | 0.2913162133295608 | T | T | T |
| 0.3143744249439344 | 0.3271595152011533 | 0.1658911613749636 | T | T | T |
| 0.9231421483011636 | 0.5288138712892024 | 0.1921004420680839 | T | T | T |
| 0.8218443279663199 | 0.3354914709188146 | 0.3227612789376088 | T | T | T |
| 0.8003231741877257 | 0.6323572156476983 | 0.6888588687427945 | T | T | T |
| 0.3595569881856892 | 0.0581415025179262 | 0.7160128232274543 | T | T | T |
| 0.3026347794071608 | 0.0667913994074033 | 0.8920836023357352 | T | T | T |
| 0.2029614722083448 | 0.0479191836645844 | 0.0221322077221724 | T | T | T |
| 0.1032382476372799 | 0.0677755269250196 | 0.8921972617930597 | T | T | T |
| 0.1048465683235550 | 0.0563748347600027 | 0.6947165341757889 | T | T | T |
| 0.2307680865649056 | 0.0285863733356038 | 0.7357273089014533 | T | T | T |
| 0.3601425799396942 | 0.8271328199410130 | 0.7439873810454729 | T | T | T |
| 0.3047682753562149 | 0.8376367010378957 | 0.9197546780658234 | T | T | T |
| 0.1887174841956286 | 0.8504608541508809 | 0.0131561023567673 | T | T | T |
| 0.0847923645737065 | 0.8291926958205751 | 0.8957474029140328 | T | T | T |
| 0.1050947230673707 | 0.8391925232884068 | 0.7002337492385513 | T | T | T |
| 0.2305524011411504 | 0.8541319523908499 | 0.7575587000889143 | T | T | T |
| 0.3212619101873498 | 0.9464450010768777 | 0.8085966152840117 | T | T | T |
| 0.0890684040054038 | 0.9489366919870820 | 0.8106266810134277 | T | T | T |
| 0.4321210606698760 | 0.1276366716762570 | 0.5869375913159183 | T | T | T |
| 0.4190372465464497 | 0.9966555299180346 | 0.5614742533111048 | T | T | T |
| 0.3988027324263357 | 0.8646392528808238 | 0.5623359112475164 | T | T | T |



**Structure files (CONTCAR) involved in this work:**

|                    |                    |                    |   |   |   |
|--------------------|--------------------|--------------------|---|---|---|
| 0.1991753719157159 | 0.1285921134101805 | 0.6118034917739225 | T | T | T |
| 0.1809071862568785 | 0.0009601740406029 | 0.5558578239055647 | T | T | T |
| 0.1977499501660660 | 0.8672013326507866 | 0.5639152646007083 | T | T | T |
| 0.9918547497105824 | 0.0401075919964845 | 0.7879862298677467 | T | T | T |
| 0.9859946822282403 | 0.8677246963836853 | 0.7765060716984838 | T | T | T |
| 0.1422859306108780 | 0.9358036386299801 | 0.2151915133345528 | T | T | T |
| 0.1988726152312693 | 0.9293620543979210 | 0.3918300577303486 | T | T | T |
| 0.2994149380899140 | 0.9485835414237024 | 0.5212173671039314 | T | T | T |
| 0.3997194214040740 | 0.9294398338881220 | 0.3926456913629733 | T | T | T |
| 0.3965088584545144 | 0.9406099988100250 | 0.1958713182453706 | T | T | T |
| 0.2703858510879593 | 0.9687522756772301 | 0.2358387564547862 | T | T | T |
| 0.1418474040805744 | 0.1692266327243653 | 0.2420546631529759 | T | T | T |
| 0.1950933985870180 | 0.1578782387728172 | 0.4185269331894708 | T | T | T |
| 0.3113641876411711 | 0.1474975011906118 | 0.5110723987106380 | T | T | T |
| 0.4177555104613806 | 0.1677277245176144 | 0.3980862202172507 | T | T | T |
| 0.3953551758828431 | 0.1591161694203846 | 0.2031629214753519 | T | T | T |
| 0.2706211701726847 | 0.1384076135417310 | 0.2578277289478791 | T | T | T |
| 0.1770510487830689 | 0.0489481616635155 | 0.3074395047652208 | T | T | T |
| 0.4164350077393418 | 0.0484618640913225 | 0.3103390449036159 | T | T | T |
| 0.0670769626039406 | 0.8702166837166111 | 0.0847612347484616 | T | T | T |
| 0.0832605781057651 | 0.0007130422857737 | 0.0618932841414043 | T | T | T |
| 0.1034157422421563 | 0.1324286252247630 | 0.0603983946456020 | T | T | T |
| 0.3017577538302967 | 0.8684463885636355 | 0.1127701059731594 | T | T | T |
| 0.3212511116479034 | 0.9956958583769580 | 0.0561283509492238 | T | T | T |
| 0.3044289113071563 | 0.1295246032119291 | 0.0647009579027229 | T | T | T |
| 0.5108223422818151 | 0.9544420356175412 | 0.2863628655545055 | T | T | T |
| 0.5162847720156412 | 0.1336705703709225 | 0.2761200142966118 | T | T | T |
| 0.6312587367707483 | 0.5625100677386566 | 0.2647386004581807 | T | T | T |
| 0.7049835986044043 | 0.5716174188168687 | 0.1039170039679775 | T | T | T |
| 0.7946484616482993 | 0.5637878354541440 | 0.9547120332086199 | T | T | T |
| 0.8831208087920956 | 0.5776706051040130 | 0.1045089988089627 | T | T | T |
| 0.8837907676556603 | 0.5263948447550645 | 0.3114569707263382 | T | T | T |
| 0.7559862659974289 | 0.5218808014781768 | 0.2713070480658715 | T | T | T |
| 0.6405872241966921 | 0.3344689307383259 | 0.2608580777920984 | T | T | T |
| 0.6901539829564883 | 0.3349566391423917 | 0.0794306845726894 | T | T | T |
| 0.8087995352530479 | 0.3495503798038614 | 0.9923293678832732 | T | T | T |
| 0.9126392678648058 | 0.3196119251922124 | 0.1099985483834826 | T | T | T |
| 0.9067510958140869 | 0.3644249445599381 | 0.2989661838663547 | T | T | T |
| 0.7679097090472272 | 0.3677327145291733 | 0.2347876102393731 | T | T | T |
| 0.6693834459007100 | 0.4496547991361534 | 0.1726260703024494 | T | T | T |
| 0.9297629038074295 | 0.4481875454746907 | 0.1469971719339940 | T | T | T |
| 0.5663896580445404 | 0.6267555830874139 | 0.4083821955168424 | T | T | T |
| 0.5934025925058880 | 0.4981834105305322 | 0.4325839274683116 | T | T | T |
| 0.5821075946377545 | 0.3646663594025129 | 0.4354499496134749 | T | T | T |
| 0.8042553506975850 | 0.6289040054509196 | 0.3696470493931839 | T | T | T |
| 0.7965648983378699 | 0.5114832893881494 | 0.4608102684803727 | T | T | T |
| 0.8215338278404822 | 0.3830506938787758 | 0.4353509448114172 | T | T | T |
| 0.0067771440541488 | 0.5550474933361653 | 0.2188889226148590 | T | T | T |
| 0.0218167601156837 | 0.3611851232244807 | 0.2103577999221995 | T | T | T |
| 0.8553695177424979 | 0.4336084405800690 | 0.7912955100861404 | T | T | T |
| 0.7962194775108127 | 0.4275654617629499 | 0.6140946665319743 | T | T | T |
| 0.6968567686137361 | 0.4217247754490264 | 0.4782010023417970 | T | T | T |
| 0.5956496001840236 | 0.4296191583857192 | 0.6044627495071609 | T | T | T |

**Structure files (CONTCAR) involved in this work:**

|                    |                    |                    |   |   |   |
|--------------------|--------------------|--------------------|---|---|---|
| 0.6033413195108640 | 0.4425004050081033 | 0.8021976923262677 | T | T | T |
| 0.7288812492355495 | 0.4756395824198711 | 0.7675411223051247 | T | T | T |
| 0.8580502883220704 | 0.6765755038664438 | 0.7560294873115649 | T | T | T |
| 0.8089404796066366 | 0.6524008012577158 | 0.5634387150731146 | T | T | T |
| 0.6906696363487708 | 0.6460300133373130 | 0.4712286326224240 | T | T | T |
| 0.5877302707485828 | 0.6665223562820559 | 0.5945965881253185 | T | T | T |
| 0.5965671251652012 | 0.6623114522540674 | 0.7915953446845500 | T | T | T |
| 0.7215091013907644 | 0.6361210600456343 | 0.7399417709262677 | T | T | T |
| 0.8317072672934005 | 0.5444558117068010 | 0.6849453679272108 | T | T | T |
| 0.5817046064792951 | 0.5485867331346952 | 0.6860550819605483 | T | T | T |
| 0.9312122866922794 | 0.3768385087591228 | 0.9296440929100621 | T | T | T |
| 0.9127169569358030 | 0.5096809727514496 | 0.9345197874703711 | T | T | T |
| 0.9041971425499554 | 0.6411906104346342 | 0.9361513476748932 | T | T | T |
| 0.6988213016326538 | 0.3730495120698850 | 0.8886332387234672 | T | T | T |
| 0.6775178123528813 | 0.5006387331195584 | 0.9442629462838666 | T | T | T |
| 0.6838153917568340 | 0.6350799848103138 | 0.9339314902500644 | T | T | T |
| 0.4871147378489378 | 0.4540694876100894 | 0.7135000512169803 | T | T | T |
| 0.4817120380904353 | 0.6331024420414800 | 0.7045465347069404 | T | T | T |
| 0.6418882346631424 | 0.9385307277748641 | 0.2817826406844726 | T | T | T |
| 0.6989228110769520 | 0.9296885656962921 | 0.1054907094787317 | T | T | T |
| 0.8009663707035659 | 0.9434725094843499 | 0.9776508586906164 | T | T | T |
| 0.9010013787622710 | 0.9260054433749466 | 0.1074444282585146 | T | T | T |
| 0.8977149511734591 | 0.9454818847382342 | 0.3045059036347770 | T | T | T |
| 0.7709742304200216 | 0.9660016178057000 | 0.2611045755884815 | T | T | T |
| 0.6424153775618604 | 0.1703599027853466 | 0.2527628746443234 | T | T | T |
| 0.6973489250243008 | 0.1581712746220098 | 0.0772868507103479 | T | T | T |
| 0.8110205130140528 | 0.1468513723904550 | 0.9780855338946203 | T | T | T |
| 0.9152176330118381 | 0.1674049014567629 | 0.0963989883479762 | T | T | T |
| 0.8979077034370796 | 0.1535866391732451 | 0.2934396760159818 | T | T | T |
| 0.7720394920159981 | 0.1416396481865208 | 0.2401697551337164 | T | T | T |
| 0.6805488773836423 | 0.0502215914204587 | 0.1900414612127020 | T | T | T |
| 0.9187805779016661 | 0.0472233498048247 | 0.1777560682319602 | T | T | T |
| 0.5687953826078688 | 0.8745925797214549 | 0.4169466097295221 | T | T | T |
| 0.5834922061090634 | 0.0060083389668014 | 0.4324473900155236 | T | T | T |
| 0.5990340937359161 | 0.1379905104437552 | 0.4344062389799382 | T | T | T |
| 0.8076720390856184 | 0.8711252130377835 | 0.3913537202392520 | T | T | T |
| 0.8183924097397093 | 1.0003128284101837 | 0.4402204912969660 | T | T | T |
| 0.8056715803509529 | 0.1344354500396851 | 0.4329865215680538 | T | T | T |
| 0.0116199449145516 | 0.9533568695137646 | 0.2133309944486042 | T | T | T |
| 0.0166614976584443 | 0.1340235053221737 | 0.2134675338842613 | T | T | T |
| 0.8612345423658758 | 0.0546322295071210 | 0.7798904963290948 | T | T | T |
| 0.8026980552684246 | 0.0708311535414832 | 0.6050125975654589 | T | T | T |
| 0.7016180050549183 | 0.0565782188663957 | 0.4753641516863874 | T | T | T |
| 0.6005994775425417 | 0.0719214893529785 | 0.6036532150302414 | T | T | T |
| 0.6058238223794536 | 0.0509140020247663 | 0.8004365866003467 | T | T | T |
| 0.7322519355086324 | 0.0279218843146625 | 0.7596715457127466 | T | T | T |
| 0.8600335043357406 | 0.8322553740891434 | 0.7569883160350913 | T | T | T |
| 0.8046650256467680 | 0.8317552807299632 | 0.5811171198304961 | T | T | T |
| 0.6915391063081602 | 0.8513000540096209 | 0.4821020131697289 | T | T | T |
| 0.5880621275544853 | 0.8268868761718361 | 0.6010564513200770 | T | T | T |
| 0.6049144691598597 | 0.8467354789242827 | 0.7960150524708363 | T | T | T |
| 0.7304496153733698 | 0.8598311083844257 | 0.7408333720555730 | T | T | T |
| 0.8210881619182320 | 0.9474716653511994 | 0.6766086987509022 | T | T | T |

**Structure files (CONTCAR) involved in this work:**

|                    |                    |                    |   |   |   |
|--------------------|--------------------|--------------------|---|---|---|
| 0.5822222089162241 | 0.9499419956923894 | 0.6732937789481195 | T | T | T |
| 0.9329424766561976 | 0.1265949678722572 | 0.9080321090760261 | T | T | T |
| 0.9186587506892940 | 0.9963626888854903 | 0.9396583797607859 | T | T | T |
| 0.9049541084275051 | 0.8637841957006286 | 0.9369505271240148 | T | T | T |
| 0.6967529037870493 | 0.1271194845299759 | 0.8840357666226822 | T | T | T |
| 0.6842032561062847 | 0.9990932563171842 | 0.9397744862784035 | T | T | T |
| 0.6980455225558150 | 0.8647145302871762 | 0.9345384563404986 | T | T | T |
| 0.4909369009015541 | 0.0443184856368064 | 0.7117853199715224 | T | T | T |
| 0.4855876024462975 | 0.8624345077934850 | 0.7152598083822677 | T | T | T |
| 0.3558140777719588 | 0.4366548563267027 | 0.7135257903652312 | T | T | T |
| 0.2991781408294373 | 0.4295350448707459 | 0.8909308474401143 | T | T | T |
| 0.1988872697155471 | 0.4543599221458339 | 0.0188610386382354 | T | T | T |
| 0.0957019257102816 | 0.4331439658771772 | 0.8968944285414127 | T | T | T |
| 0.1006869671087788 | 0.4391474983891201 | 0.6991119092596287 | T | T | T |
| 0.2273081843908502 | 0.4692646059202400 | 0.7365335710427865 | T | T | T |
| 0.3573977582838230 | 0.6699159572837180 | 0.7387612383696622 | T | T | T |
| 0.3016433229666629 | 0.6601164213694684 | 0.9132587118214061 | T | T | T |
| 0.1883249156341813 | 0.6445857273232343 | 0.0111638625484474 | T | T | T |
| 0.0854218174446352 | 0.6687147783823328 | 0.8918415052296592 | T | T | T |
| 0.1026713248709780 | 0.6586324508825194 | 0.6970165182338670 | T | T | T |
| 0.2289311966785355 | 0.6380220987950176 | 0.7495872441301525 | T | T | T |
| 0.3210903518715288 | 0.5495160478286576 | 0.8063256236435861 | T | T | T |
| 0.0807455185470955 | 0.5491610824601955 | 0.8061692169281696 | T | T | T |
| 0.4311899295835470 | 0.3758161193383444 | 0.5767993612435984 | T | T | T |
| 0.4154906531755501 | 0.5070654982573699 | 0.5671999163066139 | T | T | T |
| 0.3927568830404179 | 0.6381290683079572 | 0.5544450780533079 | T | T | T |
| 0.1961864398189982 | 0.3701371288361290 | 0.6116156026352880 | T | T | T |
| 0.1747366722604662 | 0.4979863388010594 | 0.5596947105567375 | T | T | T |
| 0.1906713845179968 | 0.6320430712410621 | 0.5565011272631815 | T | T | T |
| 0.9850284701669069 | 0.4549962659785584 | 0.7903482911363953 | T | T | T |
| 0.9828317177185097 | 0.6365040827596139 | 0.7735797680237498 | T | T | T |
| 0.1388187092468904 | 0.5628118648300010 | 0.2165775943364770 | T | T | T |
| 0.1947600099260228 | 0.5638332889346707 | 0.3912562158184293 | T | T | T |
| 0.2941230510858313 | 0.5498541052526594 | 0.5251907230447136 | T | T | T |
| 0.3916444733986830 | 0.5659362882538662 | 0.3918741446266595 | T | T | T |
| 0.3946272727669793 | 0.5546156306926029 | 0.1957319209928285 | T | T | T |
| 0.2675499953991521 | 0.5298410865101142 | 0.2335918781785279 | T | T | T |
| 0.1450480672671019 | 0.3221886410673104 | 0.2398722523932122 | T | T | T |
| 0.1930508988699097 | 0.3419056506384932 | 0.4188435199059041 | T | T | T |
| 0.3094207126840207 | 0.3528104283653437 | 0.5106693936285819 | T | T | T |
| 0.4123241595434398 | 0.3267085060762949 | 0.3911888769537368 | T | T | T |
| 0.3924163767921749 | 0.3402657326261779 | 0.1936596434768001 | T | T | T |
| 0.2710611687414785 | 0.3572769847553206 | 0.2592268304511938 | T | T | T |
| 0.1744800116388558 | 0.4461913855630650 | 0.2985805290328533 | T | T | T |
| 0.4101152993263325 | 0.4465386993511385 | 0.3114085617872292 | T | T | T |
| 0.0661859788712030 | 0.6231010770071936 | 0.0773564622689135 | T | T | T |
| 0.0773989741882452 | 0.4902060921327185 | 0.0753464591608135 | T | T | T |
| 0.1080010386231182 | 0.3605467864570749 | 0.0575505111384607 | T | T | T |
| 0.3029632918098553 | 0.6259715972283511 | 0.1054668434622989 | T | T | T |
| 0.3202551894111582 | 0.4967816782812850 | 0.0575005409134459 | T | T | T |
| 0.2940619253381359 | 0.3646523454126309 | 0.0622629007765583 | T | T | T |
| 0.5055131301744874 | 0.5376278805867994 | 0.2951418080240383 | T | T | T |
| 0.5110446540241388 | 0.3618709733827591 | 0.2686684992889399 | T | T | T |

**Structure files (CONTCAR) involved in this work:**

|                    |                    |                    |   |   |   |
|--------------------|--------------------|--------------------|---|---|---|
| 0.4378432385291454 | 0.7495576530287945 | 0.6346046456956341 | T | T | T |
| 0.1953295440060376 | 0.7483546401206136 | 0.6457766986915767 | T | T | T |
| 0.2689089778771777 | 0.7474528761720476 | 0.0554904527867670 | T | T | T |
| 0.1058510654467418 | 0.7472257492063715 | 0.0476216220991187 | T | T | T |
| 0.0640553022777535 | 0.2467476338957348 | 0.1315849729102327 | T | T | T |
| 0.3007500259394937 | 0.2475404844904917 | 0.1512310812691883 | T | T | T |
| 0.2289703814166693 | 0.2496938857787190 | 0.5528938892772512 | T | T | T |
| 0.3927090065293078 | 0.2506315643663423 | 0.5483905660193455 | T | T | T |
| 0.5583170159036450 | 0.2494639410950990 | 0.3502593810288915 | T | T | T |
| 0.8133149548871710 | 0.2511494104592790 | 0.3411658101618461 | T | T | T |
| 0.7278643932907718 | 0.2491240915039653 | 0.9386436527999126 | T | T | T |
| 0.8932805914920227 | 0.2501779767991640 | 0.9457234039492741 | T | T | T |
| 0.9457263204718592 | 0.7523651309843011 | 0.8532323672871978 | T | T | T |
| 0.6925742883301956 | 0.7496108291775898 | 0.8390880711734924 | T | T | T |
| 0.7725156073563257 | 0.7487967996782204 | 0.4336526594987289 | T | T | T |
| 0.6080772691656146 | 0.7496812928567287 | 0.4441854998716140 | T | T | T |
| 0.9554735105115931 | 0.4903737428009997 | 0.4986315829819721 | T | T | T |
| 0.0261469867479520 | 0.6817572420732462 | 0.4529285133096245 | T | T | T |
| 0.9176500079937617 | 0.4346501831824298 | 0.4034032781595074 | T | T | T |
| 0.8942809985389916 | 0.5267432897747800 | 0.5794446758658176 | T | T | T |
| 1.0013941556819830 | 0.7237536650742833 | 0.4436034704851584 | T | T | T |
| 0.9924768329534840 | 0.5844534386951211 | 0.3882584627719892 | T | T | T |
| 0.0700841112416045 | 0.6198952971924009 | 0.3299265757486196 | T | T | T |
| 0.9872163546547906 | 0.6575607068507082 | 0.2986325076257161 | T | T | T |
| 0.0732411178598793 | 0.6935761183856500 | 0.4630366898034560 | T | T | T |
| 0.0168402404003668 | 0.6238211744461514 | 0.3446790108889859 | T | T | T |

**Figure 2(a) Zn-FS**

1.0000000000000000

20.0219993591000005 0.0000000000000000 0.0000000000000000

0.0000000000000000 19.8990001678000006 0.0000000000000000

0.0000000000000000 0.0000000000000000 13.3830003737999998

93 3 194 2 5 1

Selective dynamics

Direct

|                    |                    |                     |   |   |   |
|--------------------|--------------------|---------------------|---|---|---|
| 0.4256349182715002 | 0.0563075356499563 | 0.6462980909082828  | T | T | T |
| 0.3059397887765535 | 0.0254359932631752 | 0.7904319946452001  | T | T | T |
| 0.2837623299542656 | 0.0588175020639684 | 0.0118760698892173  | T | T | T |
| 0.1252900964723646 | 0.0611642242372865 | 0.0105941992133784  | T | T | T |
| 0.0713775364093794 | 0.0283711822670707 | 0.7994723369587584  | T | T | T |
| 0.1811316441010575 | 0.0537775518413645 | 0.6539204934748887  | T | T | T |
| 0.4203327813279186 | 0.8256574397627918 | 0.6651247648187715  | T | T | T |
| 0.3058782931071126 | 0.8675146758175672 | 0.8089961854728045  | T | T | T |
| 0.2665627811684778 | 0.8270283326561613 | 0.0259337134995573  | T | T | T |
| 0.1124639421430015 | 0.8256169895460611 | 0.0081756523644501  | T | T | T |
| 0.0673013638565493 | 0.8710321563904280 | 0.7942246101863167  | T | T | T |
| 0.1859459446244480 | 0.8279797827868379 | 0.6687868556041261  | T | T | T |
| 0.0779631527681485 | 0.9406771131621221 | 0.1453340079084921  | T | T | T |
| 0.1976383938642930 | 0.9705935169725002 | 0.2885100721628346  | T | T | T |
| 0.2208233596205163 | 0.9375492024561952 | 0.5102019647465247  | T | T | T |
| 0.3797010717918908 | 0.9348047845650598 | 0.51111117690684845 | T | T | T |
| 0.4338720906717891 | 0.9675924743712011 | 0.2992238447380337  | T | T | T |
| 0.3231913212497846 | 0.9423054220694115 | 0.1539044706540351  | T | T | T |
| 0.0839577275565902 | 0.1703281997078557 | 0.1633965111521439  | T | T | T |

**Structure files (CONTCAR) involved in this work:**

|                    |                    |                    |   |   |   |
|--------------------|--------------------|--------------------|---|---|---|
| 0.1971158856600642 | 0.1282208427320468 | 0.3084978023339427 | T | T | T |
| 0.2349812937541088 | 0.1697922390487842 | 0.5251909019690322 | T | T | T |
| 0.3897015285556801 | 0.1724283220471727 | 0.5092337623007850 | T | T | T |
| 0.4373135962737393 | 0.1257921179082951 | 0.2959462270184722 | T | T | T |
| 0.3176246342498342 | 0.1685843159548959 | 0.1713485901533714 | T | T | T |
| 0.5740657633737644 | 0.5543718492540504 | 0.3558890757611249 | T | T | T |
| 0.6862946951801052 | 0.5256509956113573 | 0.1977226023153639 | T | T | T |
| 0.7132317092699939 | 0.5684794388926326 | 0.9842126304780795 | T | T | T |
| 0.8723731234235418 | 0.5726266323134123 | 0.9836930026955345 | T | T | T |
| 0.8069698214749713 | 0.5484066359626679 | 0.3408605499473812 | T | T | T |
| 0.5734871729881557 | 0.3267779854767010 | 0.3287839896801228 | T | T | T |
| 0.6937709968674751 | 0.3717335145852085 | 0.1900753544050204 | T | T | T |
| 0.7311247720447482 | 0.3266030016192543 | 0.9794827560163404 | T | T | T |
| 0.8858764103291749 | 0.3259590327330784 | 0.9981374493479399 | T | T | T |
| 0.9450762220153182 | 0.3753776709902935 | 0.1927635862881387 | T | T | T |
| 0.9195923750393122 | 0.4440586419165853 | 0.8609829622521581 | T | T | T |
| 0.8016758548814511 | 0.4713179162937522 | 0.7179815226909526 | T | T | T |
| 0.7716180082146499 | 0.4352620578702130 | 0.4947330348208843 | T | T | T |
| 0.6133464846028964 | 0.4266194288781791 | 0.4900742769786372 | T | T | T |
| 0.5659586284114125 | 0.4678070705677859 | 0.7033784046457342 | T | T | T |
| 0.6763763958337043 | 0.4474425736489195 | 0.8535947364445221 | T | T | T |
| 0.9180832996566262 | 0.6780424656939432 | 0.8250293215265861 | T | T | T |
| 0.7719993625202952 | 0.6665205738426521 | 0.4623446085200070 | T | T | T |
| 0.6162801744168583 | 0.6716430904426973 | 0.4865408923560897 | T | T | T |
| 0.5625308666089897 | 0.6263149137559418 | 0.6974044110767286 | T | T | T |
| 0.6761473338131434 | 0.6727250104539438 | 0.8213360802865497 | T | T | T |
| 0.5799458592772092 | 0.9435982495106869 | 0.3554638179384894 | T | T | T |
| 0.7009052679098634 | 0.9716015691634036 | 0.2113443601637521 | T | T | T |
| 0.7228951172358620 | 0.9341671846208633 | 0.9894519504532816 | T | T | T |
| 0.8835178218183369 | 0.9334199346031288 | 0.9931252733767545 | T | T | T |
| 0.9340972344375394 | 0.9680422240330118 | 0.2040242705961032 | T | T | T |
| 0.8246637766786556 | 0.9451254746247847 | 0.3536781812928877 | T | T | T |
| 0.5798367789389169 | 0.1713237699397001 | 0.3268694518569978 | T | T | T |
| 0.7009798483818501 | 0.1305025004084772 | 0.1908771683115689 | T | T | T |
| 0.7337768021411737 | 0.1709703455431074 | 0.9702495675485575 | T | T | T |
| 0.8884998053900164 | 0.1733098682114566 | 0.9837395035517239 | T | T | T |
| 0.9386110857581753 | 0.1258554529917926 | 0.1963166550000999 | T | T | T |
| 0.8236093687669769 | 0.1735267408226948 | 0.3264642424851555 | T | T | T |
| 0.9252376169688821 | 0.0554761972642862 | 0.8555827555983819 | T | T | T |
| 0.8058002950001342 | 0.0270634740296343 | 0.7050406819759510 | T | T | T |
| 0.7836983204819812 | 0.0674005114814720 | 0.4881065650990078 | T | T | T |
| 0.6231047796164425 | 0.0684726020659865 | 0.4881030683151077 | T | T | T |
| 0.5706720421070755 | 0.0301278251914208 | 0.6974547450105344 | T | T | T |
| 0.6824640647365399 | 0.0522258683824249 | 0.8460469408346514 | T | T | T |
| 0.9256149446199633 | 0.8301757696939313 | 0.8333543973724219 | T | T | T |
| 0.8039035483466513 | 0.8705381324648582 | 0.6943000325366055 | T | T | T |
| 0.7727070997213583 | 0.8244526440563086 | 0.4786761378829480 | T | T | T |
| 0.6172586545798514 | 0.8249723908690515 | 0.4879134141493133 | T | T | T |
| 0.5652485083346092 | 0.8731099100765283 | 0.6953021087304183 | T | T | T |
| 0.6802591156640611 | 0.8323135987411594 | 0.8282928870933662 | T | T | T |
| 0.4213697623529561 | 0.4424311914542788 | 0.6464239758555442 | T | T | T |
| 0.3010100180557986 | 0.4707892880971487 | 0.7897170218868690 | T | T | T |
| 0.2772532484716327 | 0.4368069939906898 | 0.0113412603286596 | T | T | T |

**Structure files (CONTCAR) involved in this work:**

|                    |                    |                    |   |   |   |
|--------------------|--------------------|--------------------|---|---|---|
| 0.1190924922090969 | 0.4375382373074431 | 0.0161313640441051 | T | T | T |
| 0.0643291622066691 | 0.4691964064469107 | 0.7991625324181776 | T | T | T |
| 0.1757054958275859 | 0.4423154950580126 | 0.6545695081003414 | T | T | T |
| 0.4178458421802353 | 0.6715551621952303 | 0.6606375024221085 | T | T | T |
| 0.3019785816202513 | 0.6283595873476504 | 0.8047358530185611 | T | T | T |
| 0.2653279026096718 | 0.6699576868346063 | 0.0222648896910338 | T | T | T |
| 0.1112501935804020 | 0.6718967045076051 | 0.0086354710152295 | T | T | T |
| 0.0606659546404467 | 0.6283320837947457 | 0.7938329758113767 | T | T | T |
| 0.1806502431001156 | 0.6701501687978707 | 0.6685071784363448 | T | T | T |
| 0.0770851788402685 | 0.5591167206057263 | 0.1510971795037163 | T | T | T |
| 0.1970052709075486 | 0.5241808788233796 | 0.2902913293360939 | T | T | T |
| 0.2148312192605320 | 0.5594789357058730 | 0.5150285076009664 | T | T | T |
| 0.3729969733273603 | 0.5635314582234404 | 0.5131753700410688 | T | T | T |
| 0.4252502951648446 | 0.5275380810788548 | 0.3012942577783955 | T | T | T |
| 0.3205674120010080 | 0.5529371794989352 | 0.1498821267225761 | T | T | T |
| 0.0855865126994016 | 0.3226830705097429 | 0.1619381518868865 | T | T | T |
| 0.1976520399122773 | 0.3667593735760910 | 0.3069058126443259 | T | T | T |
| 0.2331225530706105 | 0.3273276380820044 | 0.5247201985736482 | T | T | T |
| 0.3876609999499773 | 0.3263125533703948 | 0.5070538773113308 | T | T | T |
| 0.4326512606759793 | 0.3698426197933536 | 0.2916224272850127 | T | T | T |
| 0.3149969111640465 | 0.3271238819140379 | 0.1684981307103734 | T | T | T |
| 0.9226186848804077 | 0.5288500619925693 | 0.1908787774933856 | T | T | T |
| 0.8219465217443906 | 0.3372308928275707 | 0.3235272872910733 | T | T | T |
| 0.8009750287438779 | 0.6328265516563564 | 0.6888290196252186 | T | T | T |
| 0.3600870889336462 | 0.0604399497974262 | 0.7171966874186388 | T | T | T |
| 0.3066879111749351 | 0.0655378602060663 | 0.8960895462527110 | T | T | T |
| 0.2041580380239089 | 0.0432737594282544 | 0.0192975253148339 | T | T | T |
| 0.1023259919931198 | 0.0677439674097570 | 0.8951590027505499 | T | T | T |
| 0.1057521585093750 | 0.0571053203220146 | 0.6982918909467223 | T | T | T |
| 0.2316715306647767 | 0.0293573381475808 | 0.7419415734890881 | T | T | T |
| 0.3615339612616282 | 0.8253294957796051 | 0.7482764170756405 | T | T | T |
| 0.3066687748793389 | 0.8403085369168857 | 0.9227620367707459 | T | T | T |
| 0.1895172504578002 | 0.8516825506280614 | 0.0124095410671645 | T | T | T |
| 0.0863568819827350 | 0.8282932062443703 | 0.8936852713837907 | T | T | T |
| 0.1075525056587256 | 0.8403166103341613 | 0.6982604787239345 | T | T | T |
| 0.2320954696746486 | 0.8556608880614142 | 0.7602858596242598 | T | T | T |
| 0.3250830369660134 | 0.9467787950412885 | 0.8063591533442697 | T | T | T |
| 0.0881666968928533 | 0.9487789692794958 | 0.8117946963602694 | T | T | T |
| 0.4332300141911385 | 0.1261920861028006 | 0.5846422752261269 | T | T | T |
| 0.4204690870795609 | 0.9943164717633441 | 0.5672906936210220 | T | T | T |
| 0.3944213756262697 | 0.8632364074896889 | 0.5646091300789425 | T | T | T |
| 0.2016166437671232 | 0.1281953403958211 | 0.6161767273474323 | T | T | T |
| 0.1820758191262724 | 0.0003981633709668 | 0.5617659098589738 | T | T | T |
| 0.2028719278460922 | 0.8672145059947134 | 0.5656108747245641 | T | T | T |
| 0.9915897783427278 | 0.0399261414844102 | 0.7899797601659154 | T | T | T |
| 0.9877075381042454 | 0.8646217312535094 | 0.7721522654995242 | T | T | T |
| 0.1443012850286834 | 0.9344635504101076 | 0.2146283047393029 | T | T | T |
| 0.1966366283602595 | 0.9311823641656543 | 0.3948477284071724 | T | T | T |
| 0.3005040877373397 | 0.9521926980425462 | 0.5168772975188333 | T | T | T |
| 0.4040073811280288 | 0.9287139374717491 | 0.3962644255913189 | T | T | T |
| 0.3982099890445363 | 0.9382938532081662 | 0.1992470228245053 | T | T | T |
| 0.2722076504748971 | 0.9670058395909704 | 0.2412908042167732 | T | T | T |
| 0.1426052131770627 | 0.1712111831373938 | 0.2466801796541227 | T | T | T |

**Structure files (CONTCAR) involved in this work:**

|                    |                    |                    |   |   |   |
|--------------------|--------------------|--------------------|---|---|---|
| 0.1946111499657313 | 0.1545621870598606 | 0.4227159626143858 | T | T | T |
| 0.3123577969372359 | 0.1468692822365520 | 0.5106010814935240 | T | T | T |
| 0.4186036532495294 | 0.1673330922716040 | 0.3965592975680773 | T | T | T |
| 0.3955908040249020 | 0.1573905126747805 | 0.2022760108654973 | T | T | T |
| 0.2714775558886090 | 0.1400153304071798 | 0.2624332168323797 | T | T | T |
| 0.1773854595936259 | 0.0490304799679890 | 0.3035767551177487 | T | T | T |
| 0.4175546498201756 | 0.0473033102181752 | 0.3108735896984676 | T | T | T |
| 0.0675627183102317 | 0.8716325305305076 | 0.0821154140833502 | T | T | T |
| 0.0831883849651475 | 0.0022257876156343 | 0.0658936336346579 | T | T | T |
| 0.1099206598900425 | 0.1324726983568502 | 0.0635162860409602 | T | T | T |
| 0.3018231648701705 | 0.8680734816431642 | 0.1158015660072750 | T | T | T |
| 0.3230336095658608 | 0.9956548000438401 | 0.0617796930862996 | T | T | T |
| 0.3012573962720633 | 0.1288211320983854 | 0.0682243575315784 | T | T | T |
| 0.5133936620956212 | 0.9542233515208944 | 0.2880322330755018 | T | T | T |
| 0.5171075169968347 | 0.1320720170583554 | 0.2746835134957287 | T | T | T |
| 0.6321662490063098 | 0.5584125230058835 | 0.2727039389449223 | T | T | T |
| 0.6928487027722195 | 0.5745154449445493 | 0.1014422988859048 | T | T | T |
| 0.7929239824277116 | 0.5567687703252673 | 0.9689753799157841 | T | T | T |
| 0.8913769473643934 | 0.5800979355692488 | 0.1000364549529202 | T | T | T |
| 0.8822338647261685 | 0.5281455721143908 | 0.3071812357356810 | T | T | T |
| 0.7581214382667051 | 0.5236902436920613 | 0.2537955975047030 | T | T | T |
| 0.6414302209113082 | 0.3353003950233553 | 0.2657431233448620 | T | T | T |
| 0.6898703932940843 | 0.3321599393898787 | 0.0833773898545341 | T | T | T |
| 0.8082784244009179 | 0.3501425311463633 | 0.9974669804693291 | T | T | T |
| 0.9130496562427527 | 0.3221016748260203 | 0.1134072392755278 | T | T | T |
| 0.9061601919006496 | 0.3691632939849602 | 0.3015551781384633 | T | T | T |
| 0.7676105243046002 | 0.3700505301300998 | 0.2363721610373320 | T | T | T |
| 0.6674435903661509 | 0.4487391941660414 | 0.1696350965572143 | T | T | T |
| 0.9386834361052585 | 0.4496269689429395 | 0.1488730327485417 | T | T | T |
| 0.5701950958026065 | 0.6255470378265184 | 0.4143491580971387 | T | T | T |
| 0.5877535771450156 | 0.4951938244457312 | 0.4369194384031970 | T | T | T |
| 0.5793848526175515 | 0.3614660220811599 | 0.4387944766833690 | T | T | T |
| 0.8002515141737426 | 0.6286970874321954 | 0.3624029773476430 | T | T | T |
| 0.7891312380842253 | 0.5114597828649210 | 0.4495080021521206 | T | T | T |
| 0.8197185193599803 | 0.3830730636730194 | 0.4372933080610604 | T | T | T |
| 0.0089075155903227 | 0.5586534313207214 | 0.2278604674912877 | T | T | T |
| 0.0226414228028200 | 0.3573732635894633 | 0.2178609748819318 | T | T | T |
| 0.8550424060852944 | 0.4321640285259730 | 0.7881924120257419 | T | T | T |
| 0.7927065375531149 | 0.4328643709846806 | 0.6114377846525795 | T | T | T |
| 0.6938065497531499 | 0.4200765988879426 | 0.4765462535143383 | T | T | T |
| 0.5944738541339990 | 0.4269473195685636 | 0.6072153644681652 | T | T | T |
| 0.6029786404931449 | 0.4403897667716423 | 0.8030982283444164 | T | T | T |
| 0.7290610578753423 | 0.4748879266062396 | 0.7700045063275860 | T | T | T |
| 0.8591047393026875 | 0.6828592369411921 | 0.7453582339087743 | T | T | T |
| 0.8171758567344489 | 0.6390091396024439 | 0.5566032875820629 | T | T | T |
| 0.6940419571403659 | 0.6465156932718313 | 0.4819766160244236 | T | T | T |
| 0.5884343799255928 | 0.6668300397212282 | 0.5994993436987133 | T | T | T |
| 0.5970159459798300 | 0.6596521674870418 | 0.7954522234964740 | T | T | T |
| 0.7209052663797637 | 0.6434236546102496 | 0.7310899011388282 | T | T | T |
| 0.8295900271516938 | 0.5469372654045835 | 0.6918594225016295 | T | T | T |
| 0.5813753081621047 | 0.5471661285833811 | 0.6868748026420431 | T | T | T |
| 0.9296359886179045 | 0.3781014450201843 | 0.9314436995640248 | T | T | T |
| 0.9120433290669138 | 0.5105062652915838 | 0.9298218888260823 | T | T | T |

**Structure files (CONTCAR) involved in this work:**

|                    |                    |                    |   |   |   |
|--------------------|--------------------|--------------------|---|---|---|
| 0.8938874709332191 | 0.6415329368039668 | 0.9275650960753892 | T | T | T |
| 0.6984022653909228 | 0.3741702987684936 | 0.8942033695481392 | T | T | T |
| 0.6732085521304346 | 0.5029664303870911 | 0.9420445348162755 | T | T | T |
| 0.6913658840585263 | 0.6370488239292456 | 0.9285366446266117 | T | T | T |
| 0.4864553937835798 | 0.4534185674654666 | 0.7167452623400909 | T | T | T |
| 0.4817977807507349 | 0.6325977894975930 | 0.7074417775267471 | T | T | T |
| 0.6442611251539331 | 0.9387195123371426 | 0.2825875185511380 | T | T | T |
| 0.7018347572849147 | 0.9311330531724056 | 0.1062068581239830 | T | T | T |
| 0.8035175525195249 | 0.9380930361081551 | 0.9764162595238659 | T | T | T |
| 0.9017480780766175 | 0.9269201774205382 | 0.1107765984498494 | T | T | T |
| 0.8999922908750925 | 0.9451384955918148 | 0.3085005639343970 | T | T | T |
| 0.7734197131689254 | 0.9636126086565883 | 0.2638462162941509 | T | T | T |
| 0.6435290786524054 | 0.1700008996879324 | 0.2526701691507499 | T | T | T |
| 0.6976906025171357 | 0.1574278289678457 | 0.0767582191064842 | T | T | T |
| 0.8115180995230056 | 0.1470916443869995 | 0.9781395455608501 | T | T | T |
| 0.9159854533463611 | 0.1664015333699769 | 0.0968981007967413 | T | T | T |
| 0.9002986364777447 | 0.1546749576898334 | 0.2938494379235921 | T | T | T |
| 0.7741402885793198 | 0.1444838956429085 | 0.2385617538725545 | T | T | T |
| 0.6846032792097653 | 0.0504669534828592 | 0.1932107519810606 | T | T | T |
| 0.9212553587748145 | 0.0469574465164019 | 0.1819136271550339 | T | T | T |
| 0.5726789633895381 | 0.8735614753327013 | 0.4171727082159903 | T | T | T |
| 0.5862344679819851 | 0.0050723085407866 | 0.4348778238993734 | T | T | T |
| 0.5993935133615264 | 0.1374050242014012 | 0.4336206824886817 | T | T | T |
| 0.8112117638760284 | 0.8702382980139685 | 0.3971553423005777 | T | T | T |
| 0.8191821606119184 | 1.0005969495490423 | 0.4420482855826638 | T | T | T |
| 0.8071054777327478 | 0.1351072612332543 | 0.4314163892035416 | T | T | T |
| 0.0133493353050550 | 0.9517815980550031 | 0.2162301655909693 | T | T | T |
| 0.0188214393495286 | 0.1343171425960267 | 0.2117224289515788 | T | T | T |
| 0.8613114293594581 | 0.0557920095561602 | 0.7817566352922046 | T | T | T |
| 0.8056859113348707 | 0.0731126087346947 | 0.6048429499245342 | T | T | T |
| 0.7031686707125067 | 0.0583214296022926 | 0.4778400499083562 | T | T | T |
| 0.6013632651769409 | 0.0734086209574041 | 0.6048592971884712 | T | T | T |
| 0.6069761391073860 | 0.0493257750454117 | 0.8019583251739322 | T | T | T |
| 0.7326296909564778 | 0.0301807673763977 | 0.7566178830613502 | T | T | T |
| 0.8587282976749022 | 0.8369175260096828 | 0.7669696584182295 | T | T | T |
| 0.8067674585981369 | 0.8312847599965694 | 0.5881521696349146 | T | T | T |
| 0.6951178791782625 | 0.8487454765648630 | 0.4841146120145280 | T | T | T |
| 0.5904015631261023 | 0.8273085987380706 | 0.6021590141591774 | T | T | T |
| 0.6036016885496884 | 0.8500826538993478 | 0.7965900364589510 | T | T | T |
| 0.7298299907227079 | 0.8635544963244496 | 0.7431057337171328 | T | T | T |
| 0.8218356894550247 | 0.9492932185910057 | 0.6763143970357340 | T | T | T |
| 0.5813829163259202 | 0.9511970587328088 | 0.6703479727510900 | T | T | T |
| 0.9335652852996160 | 0.1289727068460036 | 0.9071757273718085 | T | T | T |
| 0.9175237371583522 | 1.0001091627794871 | 0.9443972806499253 | T | T | T |
| 0.9144120624710470 | 0.8671724544098880 | 0.9400694661548789 | T | T | T |
| 0.6971645125595239 | 0.1284351483066956 | 0.8826956939067452 | T | T | T |
| 0.6898942465780048 | 0.0010694835113434 | 0.9400107751523904 | T | T | T |
| 0.6956711253257477 | 0.8662698245183950 | 0.9362321938664729 | T | T | T |
| 0.4918475294126106 | 0.0462857917462904 | 0.7142367672721002 | T | T | T |
| 0.4854141088534299 | 0.8630056373881375 | 0.7116745856527921 | T | T | T |
| 0.3554949256303466 | 0.4356074298000921 | 0.7167256671726135 | T | T | T |
| 0.2983830194638388 | 0.4298012074325238 | 0.8948301489523522 | T | T | T |
| 0.1981720748403590 | 0.4559142271886230 | 0.0238991458591395 | T | T | T |



**Structure files (CONTCAR) involved in this work:**

|                    |                    |                    |   |   |   |
|--------------------|--------------------|--------------------|---|---|---|
| 0.0944547525488562 | 0.4378207167762684 | 0.9018992426038080 | T | T | T |
| 0.1018771016363980 | 0.4356900950677501 | 0.7037115686845997 | T | T | T |
| 0.2272950222766412 | 0.4683921249379032 | 0.7398682434895991 | T | T | T |
| 0.3571254663636632 | 0.6689547800722659 | 0.7406313768002616 | T | T | T |
| 0.3033754343063784 | 0.6589355516474622 | 0.9168651008031515 | T | T | T |
| 0.1880008249757534 | 0.6449193279420484 | 0.0109680073689449 | T | T | T |
| 0.0810912276669710 | 0.6653822198617749 | 0.8977123236190114 | T | T | T |
| 0.1029587692228055 | 0.6627306749517841 | 0.7030997805565447 | T | T | T |
| 0.2279629790135857 | 0.6384880744921456 | 0.7561989616511258 | T | T | T |
| 0.3210597878943737 | 0.5489759242464278 | 0.8085573242932778 | T | T | T |
| 0.0793364124297971 | 0.5493339664762528 | 0.8008605332674832 | T | T | T |
| 0.4310753452924600 | 0.3745207190068520 | 0.5802750157102111 | T | T | T |
| 0.4159870044264249 | 0.5056199644143596 | 0.5694035644825263 | T | T | T |
| 0.3934720669307296 | 0.6367629265419575 | 0.5567370353231605 | T | T | T |
| 0.1980345117104966 | 0.3689653163079765 | 0.6142495987743626 | T | T | T |
| 0.1743008771910622 | 0.4964575264335706 | 0.5631075352498428 | T | T | T |
| 0.1925819050536300 | 0.6305118126302305 | 0.5639489518281525 | T | T | T |
| 0.9853334849901925 | 0.4527354310523807 | 0.7905666306058368 | T | T | T |
| 0.9814004201986825 | 0.6374738882721187 | 0.7745846804504627 | T | T | T |
| 0.1416979798096241 | 0.5633925179358157 | 0.2223031976768298 | T | T | T |
| 0.1976883674488283 | 0.5626390378990082 | 0.3966383957865764 | T | T | T |
| 0.2943647011983511 | 0.5476568791619812 | 0.5326862658849973 | T | T | T |
| 0.3888220511226141 | 0.5644867216902382 | 0.3947322513997436 | T | T | T |
| 0.3947392161743457 | 0.5569137074220146 | 0.1976623807672426 | T | T | T |
| 0.2691100070214415 | 0.5290283223423995 | 0.2371560865094959 | T | T | T |
| 0.1475106325101027 | 0.3223072993459876 | 0.2395430860800890 | T | T | T |
| 0.1929361907395243 | 0.3408382338465092 | 0.4211186002514817 | T | T | T |
| 0.3101540132192049 | 0.3516440031556176 | 0.5106523340630160 | T | T | T |
| 0.4139911702266894 | 0.3282546243909163 | 0.3924667981798846 | T | T | T |
| 0.3932785576519200 | 0.3401170964617087 | 0.1946022620670793 | T | T | T |
| 0.2728774284978500 | 0.3564822319250577 | 0.2637364237767367 | T | T | T |
| 0.1757317180495849 | 0.4457496557507184 | 0.3015102914237953 | T | T | T |
| 0.4113113688911533 | 0.4474712668277624 | 0.3098661426772433 | T | T | T |
| 0.0675401947300109 | 0.6267671727936706 | 0.0866529003357326 | T | T | T |
| 0.0768239579040474 | 0.4929754160421602 | 0.0819723060202685 | T | T | T |
| 0.1054106858710090 | 0.3633567535846112 | 0.0609165018767049 | T | T | T |
| 0.3009563078028599 | 0.6269406710813810 | 0.1097099728394578 | T | T | T |
| 0.3200656621186853 | 0.4981329682261349 | 0.0598414062146637 | T | T | T |
| 0.2930078920867222 | 0.3658338204005153 | 0.0665751162166144 | T | T | T |
| 0.5043279286959037 | 0.5419818164575545 | 0.2987361691264729 | T | T | T |
| 0.5119742347222133 | 0.3624032135204788 | 0.2686163922247612 | T | T | T |
| 0.4378281481493607 | 0.7486490389813748 | 0.6359297561919597 | T | T | T |
| 0.1990332557388321 | 0.7486067043646807 | 0.6508809294059869 | T | T | T |
| 0.2685109846343374 | 0.7480710595686261 | 0.0550318064875759 | T | T | T |
| 0.1068328217637011 | 0.7486840635751844 | 0.0474731060293066 | T | T | T |
| 0.0670806439085981 | 0.2467212122457400 | 0.1298898375610283 | T | T | T |
| 0.3016463458293789 | 0.2475595538117813 | 0.1524413576136811 | T | T | T |
| 0.2300052189602748 | 0.2485986007480972 | 0.5539499080509195 | T | T | T |
| 0.3941704745751681 | 0.2497114467342655 | 0.5472763175935431 | T | T | T |
| 0.5574718433257031 | 0.2481650164318939 | 0.3475821971509397 | T | T | T |
| 0.8161668380187456 | 0.2525966360047144 | 0.3406211455257615 | T | T | T |
| 0.7285804969020869 | 0.2496426886166659 | 0.9394842751604470 | T | T | T |
| 0.8931787841738490 | 0.2514662863364485 | 0.9497822636224839 | T | T | T |

**Structure files (CONTCAR) involved in this work:**

|                    |                    |                    |   |   |   |
|--------------------|--------------------|--------------------|---|---|---|
| 0.9440867591690006 | 0.7527349591180001 | 0.8563602817698889 | T | T | T |
| 0.6900795129004692 | 0.7523406847095975 | 0.8376630188794175 | T | T | T |
| 0.7791479516954514 | 0.7464929882599538 | 0.4441538964521551 | T | T | T |
| 0.6108790529283236 | 0.7485131566627926 | 0.4471485304853346 | T | T | T |
| 0.9438190280228111 | 0.4983613611871236 | 0.5035356534705895 | T | T | T |
| 0.0473353544841074 | 0.7433704562972533 | 0.5070324450473721 | T | T | T |
| 0.9146778613123800 | 0.4368031181150039 | 0.4116559543529544 | T | T | T |
| 0.8793380418619609 | 0.5526780336413372 | 0.5563629486503971 | T | T | T |
| 0.0438468560097188 | 0.7830954456842546 | 0.4649306226819653 | T | T | T |
| 0.0603054863308485 | 0.6268749919348605 | 0.3226596503312382 | T | T | T |
| 0.9954044890429671 | 0.5772491754316389 | 0.3807740234113967 | T | T | T |
| 0.9741615860919964 | 0.6467163211798921 | 0.2986327047256899 | T | T | T |
| 0.0476619972775794 | 0.7610926644402144 | 0.5749669633642169 | T | T | T |
| 1.0098829417048054 | 0.6062901897468197 | 0.3144174565660113 | T | T | T |

**Figure 2(a) Ga-IS**

1.0000000000000000

20.0219993591000005 0.0000000000000000 0.0000000000000000

0.0000000000000000 19.8990001678000006 0.0000000000000000

0.0000000000000000 0.0000000000000000 13.3830003737999998

93 3 193 1 6 1

## Selective dynamics

## Direct

|                    |                    |                    |   |   |   |
|--------------------|--------------------|--------------------|---|---|---|
| 0.4218535263509722 | 0.0571493549471711 | 0.6480621783635740 | T | T | T |
| 0.3009930426280221 | 0.0268336055798244 | 0.7891971078729654 | T | T | T |
| 0.2798649472190959 | 0.0604824123584748 | 0.0125564137349485 | T | T | T |
| 0.1201048157933897 | 0.0632633678614951 | 0.0123205109774034 | T | T | T |
| 0.0670518968425782 | 0.0288941088995145 | 0.7991042412032598 | T | T | T |
| 0.1763645011047572 | 0.0555514966770261 | 0.6510519083569406 | T | T | T |
| 0.4195589490851646 | 0.8271326124360456 | 0.6702106915850621 | T | T | T |
| 0.3016023397863279 | 0.8684681358613844 | 0.8090926444563067 | T | T | T |
| 0.2669431061873340 | 0.8282841518982380 | 0.0293307096496349 | T | T | T |
| 0.1119266120518958 | 0.8263275624160045 | 0.0172200103485949 | T | T | T |
| 0.0610534720982372 | 0.8695591887099141 | 0.8025857089458839 | T | T | T |
| 0.1789223529702397 | 0.8276798350378840 | 0.6734978466452191 | T | T | T |
| 0.0754079496497653 | 0.9427241949319765 | 0.1505997367288927 | T | T | T |
| 0.1963914901844603 | 0.9725793956273634 | 0.2930341568863213 | T | T | T |
| 0.2168596826333200 | 0.9365571408917646 | 0.5142176716373825 | T | T | T |
| 0.3765128883101525 | 0.9335843362088596 | 0.5155510930850085 | T | T | T |
| 0.4301757192074476 | 0.9693460245824355 | 0.3044471819970909 | T | T | T |
| 0.3207861463900983 | 0.9446463111498176 | 0.1551082387187463 | T | T | T |
| 0.0785334970793699 | 0.1720958592461983 | 0.1645883319852359 | T | T | T |
| 0.1960568831684171 | 0.1299566636577438 | 0.3071270312448675 | T | T | T |
| 0.2308130746194621 | 0.1728084135794319 | 0.5244259559398117 | T | T | T |
| 0.3854345248170361 | 0.1737922075139053 | 0.5122428494954008 | T | T | T |
| 0.4365362214915223 | 0.1275601070438057 | 0.3021402537153293 | T | T | T |
| 0.3189667509454210 | 0.1674181080182322 | 0.1714794487002962 | T | T | T |
| 0.5811590826197133 | 0.5574184695661799 | 0.3465028215214829 | T | T | T |
| 0.6931793846631962 | 0.5320427711363038 | 0.1881870098915641 | T | T | T |
| 0.7118478528233325 | 0.5634667841776846 | 0.9719004741332142 | T | T | T |
| 0.8701339470374734 | 0.5573251654552607 | 0.9715460225618031 | T | T | T |
| 0.9340185282962565 | 0.5275128212548452 | 0.1833464934697631 | T | T | T |
| 0.5782911940056650 | 0.3284888895184537 | 0.3304354543153849 | T | T | T |
| 0.7052919909607667 | 0.3743604675390628 | 0.2146860064936504 | T | T | T |

**Structure files (CONTCAR) involved in this work:**

|                    |                    |                    |   |   |   |
|--------------------|--------------------|--------------------|---|---|---|
| 0.7360127535444647 | 0.3302862570604432 | 0.9923168031781628 | T | T | T |
| 0.8874545671466336 | 0.3265761304946295 | 0.9792103150562070 | T | T | T |
| 0.9356447777219401 | 0.3708639796295401 | 0.1977644165972947 | T | T | T |
| 0.9250504651473150 | 0.4347310331566021 | 0.8345657613350213 | T | T | T |
| 0.7820876639230221 | 0.4439706912942754 | 0.4768719134496564 | T | T | T |
| 0.6224761427484822 | 0.4337948684708834 | 0.4886710615626981 | T | T | T |
| 0.5665570552234058 | 0.4664374945944871 | 0.7044028264174074 | T | T | T |
| 0.6738480612297906 | 0.4341705758572445 | 0.8481776011906561 | T | T | T |
| 0.9172751247299757 | 0.6714533362065040 | 0.8264135791513283 | T | T | T |
| 0.7984193821376735 | 0.6320632732992451 | 0.6981753271952869 | T | T | T |
| 0.7668043893503551 | 0.6671394656539746 | 0.4796389499492193 | T | T | T |
| 0.6109508350266779 | 0.6706772983513787 | 0.4855046967936474 | T | T | T |
| 0.5642786380637972 | 0.6249713465343945 | 0.7039233818483126 | T | T | T |
| 0.6801951425686781 | 0.6811331161026075 | 0.8265998855200110 | T | T | T |
| 0.5748780881143531 | 0.9434756818473815 | 0.3643064548914197 | T | T | T |
| 0.6951325876119441 | 0.9722819927886803 | 0.2215045889130423 | T | T | T |
| 0.7175141625215318 | 0.9435283890428678 | 0.9978512436451652 | T | T | T |
| 0.8777354603013592 | 0.9332985218401930 | 0.9956595641064112 | T | T | T |
| 0.9310398264462592 | 0.9689858336586354 | 0.2075636425277878 | T | T | T |
| 0.8200858759658303 | 0.9366810059411250 | 0.3535482480636105 | T | T | T |
| 0.5807412388660538 | 0.1744124689772164 | 0.3348917079761407 | T | T | T |
| 0.6990250957369568 | 0.1312343701655294 | 0.2011844505196478 | T | T | T |
| 0.7315731536325814 | 0.1722389616118107 | 0.9799415933870534 | T | T | T |
| 0.8863526443282055 | 0.1722708283931382 | 0.9942067249412929 | T | T | T |
| 0.9342556932239177 | 0.1277641853866669 | 0.2066987034272358 | T | T | T |
| 0.8201794077050835 | 0.1690746668929108 | 0.3416028199090491 | T | T | T |
| 0.9232942262813424 | 0.0566787508410158 | 0.8614692516858540 | T | T | T |
| 0.8044603197913602 | 0.0293540498555842 | 0.7214708800912248 | T | T | T |
| 0.7809398847150177 | 0.0548570670093227 | 0.4956671368990015 | T | T | T |
| 0.6209579898154161 | 0.0675266306974152 | 0.4942579889720307 | T | T | T |
| 0.5668356752561152 | 0.0333886604481961 | 0.7028361410808515 | T | T | T |
| 0.6778058697044074 | 0.0598795413054773 | 0.8516386238490270 | T | T | T |
| 0.9164957571789429 | 0.8242096017144789 | 0.8402311507378997 | T | T | T |
| 0.8012820358160013 | 0.8730365150141779 | 0.7056117669323996 | T | T | T |
| 0.7674515862246949 | 0.8285408792548807 | 0.4886440798111451 | T | T | T |
| 0.6121408575389822 | 0.8260161908619779 | 0.4973880392236651 | T | T | T |
| 0.5619097998999223 | 0.8765063154130033 | 0.7040044975384205 | T | T | T |
| 0.6764540012696543 | 0.8374598538724669 | 0.8381478881728910 | T | T | T |
| 0.4223644036708691 | 0.4455423444954008 | 0.6392048892670559 | T | T | T |
| 0.3036534872373551 | 0.4729704659516329 | 0.7877586689983502 | T | T | T |
| 0.2844910394023756 | 0.4325116030489440 | 0.0054973311933821 | T | T | T |
| 0.1259106471004543 | 0.4308565165405014 | 0.0011743921364840 | T | T | T |
| 0.0730388314173283 | 0.4721238590000567 | 0.7941497233655710 | T | T | T |
| 0.1819424209975224 | 0.4491583748841208 | 0.6455352751342716 | T | T | T |
| 0.4236658256163679 | 0.6721081253611274 | 0.6631833010381030 | T | T | T |
| 0.3017041820501163 | 0.6296957342448550 | 0.7992945043989437 | T | T | T |
| 0.2691788363209255 | 0.6720936112571110 | 0.0176426301405286 | T | T | T |
| 0.1148790946254223 | 0.6732698229951879 | 0.0075962402952499 | T | T | T |
| 0.0649397147131126 | 0.6293542823308655 | 0.7981511059488113 | T | T | T |
| 0.1796206881739906 | 0.6691492307427751 | 0.6631546162092619 | T | T | T |
| 0.0792149573076060 | 0.5528929652614991 | 0.1341309179350318 | T | T | T |
| 0.1997555524754233 | 0.5275732533011990 | 0.2808563767225181 | T | T | T |
| 0.2220506971718521 | 0.5676282361779528 | 0.5016906663873968 | T | T | T |

**Structure files (CONTCAR) involved in this work:**

|                    |                    |                    |   |   |   |
|--------------------|--------------------|--------------------|---|---|---|
| 0.3830536915806562 | 0.5703623780089444 | 0.5030540673314405 | T | T | T |
| 0.4337904941402755 | 0.5277180418403731 | 0.2940525055401935 | T | T | T |
| 0.3262726315477877 | 0.5523760161606432 | 0.1422862767936124 | T | T | T |
| 0.0808524813732490 | 0.3272187457662028 | 0.1570503868105178 | T | T | T |
| 0.1969461145916540 | 0.3693337819120046 | 0.3026815497905488 | T | T | T |
| 0.2314765275006536 | 0.3294348534525895 | 0.5219370843590667 | T | T | T |
| 0.3858314789881234 | 0.3271050341484099 | 0.5083394570263451 | T | T | T |
| 0.4342149050373649 | 0.3705802684359298 | 0.2952977652622693 | T | T | T |
| 0.3181026867879524 | 0.3261111762098494 | 0.1665471566343300 | T | T | T |
| 0.8125888670663812 | 0.5669163126619736 | 0.3201055425209560 | T | T | T |
| 0.8279878554738787 | 0.3271757994786100 | 0.3530937783400248 | T | T | T |
| 0.7962364758331901 | 0.4738000954041794 | 0.7200756322136357 | T | T | T |
| 0.3562082135461324 | 0.0624799125891613 | 0.7185536008092370 | T | T | T |
| 0.2998148920214803 | 0.0657519195140353 | 0.8955883482547691 | T | T | T |
| 0.1997267501978470 | 0.0510359536340985 | 0.0269302224361851 | T | T | T |
| 0.1007593326204272 | 0.0657370582876666 | 0.8950326853278057 | T | T | T |
| 0.1014758765230468 | 0.0566511046870559 | 0.6973436552762777 | T | T | T |
| 0.2276666011557325 | 0.0324166996236528 | 0.7385364150182383 | T | T | T |
| 0.3571891635947040 | 0.8263041500571191 | 0.7476369396020388 | T | T | T |
| 0.3039305175211950 | 0.8434386539700043 | 0.9240228507071961 | T | T | T |
| 0.1891810010002075 | 0.8519144432577548 | 0.0206840101045600 | T | T | T |
| 0.0838933480232313 | 0.8317021837245946 | 0.9042483942135817 | T | T | T |
| 0.1013787914711699 | 0.8368383182438421 | 0.7083618746731233 | T | T | T |
| 0.2275597405816470 | 0.8547024887754162 | 0.7625743203884099 | T | T | T |
| 0.3194965781963575 | 0.9479408865160934 | 0.8036139806215772 | T | T | T |
| 0.0793333116079964 | 0.9485932329240825 | 0.8103828970197711 | T | T | T |
| 0.4298771098596816 | 0.1265430950707582 | 0.5850412989962379 | T | T | T |
| 0.4163286256096157 | 0.9945077472940582 | 0.5701988945165724 | T | T | T |
| 0.3971179581163824 | 0.8622518999078608 | 0.5657391949891846 | T | T | T |
| 0.1937263510953571 | 0.1304931420641324 | 0.6115170585290031 | T | T | T |
| 0.1790841099945695 | 0.0023242748679664 | 0.5589502510634574 | T | T | T |
| 0.1923734150947638 | 0.8684961253756285 | 0.5704220047814275 | T | T | T |
| 0.9880375600711204 | 0.0456804488728508 | 0.7904672822421190 | T | T | T |
| 0.9810926869066421 | 0.8595501015350280 | 0.7871144305559454 | T | T | T |
| 0.1416142073504147 | 0.9386777918187263 | 0.2198889688884762 | T | T | T |
| 0.1977120469206710 | 0.9302515967028171 | 0.3968353994880900 | T | T | T |
| 0.2968311070086571 | 0.9463219554889122 | 0.5293573597874968 | T | T | T |
| 0.3962603247799663 | 0.9300558352150929 | 0.3983312829311885 | T | T | T |
| 0.3957512378024930 | 0.9446560261754797 | 0.2008585483627101 | T | T | T |
| 0.2697541515553112 | 0.9696706845933534 | 0.2419420130273409 | T | T | T |
| 0.1418837268672775 | 0.1697853463828949 | 0.2398989948158317 | T | T | T |
| 0.1934193982709829 | 0.1620340323578517 | 0.4182074382463412 | T | T | T |
| 0.3080799389716304 | 0.1480444602819091 | 0.5149721325236456 | T | T | T |
| 0.4132287821997593 | 0.1708110299480836 | 0.3988471776906977 | T | T | T |
| 0.3963878591452215 | 0.1551466058586328 | 0.2042965930842229 | T | T | T |
| 0.2705373229582335 | 0.1389492692356029 | 0.2600123614713752 | T | T | T |
| 0.1769539026280285 | 0.0507025784322508 | 0.3132057346675339 | T | T | T |
| 0.4180541430653761 | 0.0492772131689350 | 0.3211489690586689 | T | T | T |
| 0.0668889673521775 | 0.8713690323028729 | 0.0924082723464750 | T | T | T |
| 0.0806207186322538 | 0.0022835445425002 | 0.0675258510284635 | T | T | T |
| 0.0979381492839693 | 0.1345564035252735 | 0.0607270462509248 | T | T | T |
| 0.3028727301195815 | 0.8688929750126491 | 0.1192702139085853 | T | T | T |
| 0.3172818998705651 | 0.9953018775158782 | 0.0598918153170800 | T | T | T |

**Structure files (CONTCAR) involved in this work:**

|                    |                    |                    |   |   |   |
|--------------------|--------------------|--------------------|---|---|---|
| 0.3038681145296493 | 0.1291542746216550 | 0.0668899900231210 | T | T | T |
| 0.5091146291417630 | 0.9527068920778134 | 0.2948389487382883 | T | T | T |
| 0.5164493507457806 | 0.1361652644953395 | 0.2855117561683613 | T | T | T |
| 0.6421349686433899 | 0.5660262290749571 | 0.2689493796078040 | T | T | T |
| 0.6734083439066083 | 0.5614811404488478 | 0.0782737251479872 | T | T | T |
| 0.7911462689938489 | 0.5471060499688036 | 0.9876608473522168 | T | T | T |
| 0.9096775261822643 | 0.5573524527178151 | 0.0778204575891337 | T | T | T |
| 0.9000232410875810 | 0.5699078304410037 | 0.2785113712850489 | T | T | T |
| 0.7689550499541014 | 0.5527053467116616 | 0.2123199403281930 | T | T | T |
| 0.6401933490922502 | 0.3326311847578154 | 0.2538939328136181 | T | T | T |
| 0.7288176143242140 | 0.3371416423000042 | 0.1119776707256506 | T | T | T |
| 0.8116845880685588 | 0.3540677832141270 | 0.9607896777590881 | T | T | T |
| 0.9104357134488765 | 0.3368893727727595 | 0.0935606082032336 | T | T | T |
| 0.9047552691925489 | 0.3358310737367063 | 0.2943378979893652 | T | T | T |
| 0.7642733681417795 | 0.3725757986973974 | 0.2961221175302882 | T | T | T |
| 0.6816540170463412 | 0.4508381597567421 | 0.1898555145318213 | T | T | T |
| 0.9133209175046133 | 0.4501392411446048 | 0.1942416862317486 | T | T | T |
| 0.5674274512917776 | 0.6279394676918884 | 0.4048241112697823 | T | T | T |
| 0.5984131401502850 | 0.5006728794720843 | 0.4302720693722719 | T | T | T |
| 0.5942018898366328 | 0.3670572312018479 | 0.4348306721390571 | T | T | T |
| 0.8040099595187797 | 0.6425035793965108 | 0.3806458067788583 | T | T | T |
| 0.8048427131034757 | 0.4995340398156358 | 0.4005377592997945 | T | T | T |
| 0.8296660954255657 | 0.3736050235619146 | 0.4732241922538947 | T | T | T |
| 0.0131854970426204 | 0.5407253651866029 | 0.2028399377255923 | T | T | T |
| 0.0173519267862332 | 0.3689903132630832 | 0.1995647557563487 | T | T | T |
| 0.8715693245807259 | 0.4227008192869661 | 0.7408430049297010 | T | T | T |
| 0.8144930573158575 | 0.4654043689278851 | 0.5890627062359570 | T | T | T |
| 0.7038163957795618 | 0.4307254950758050 | 0.4919103004663157 | T | T | T |
| 0.5948726411452867 | 0.4339939452037882 | 0.6017212803884746 | T | T | T |
| 0.5992277260719163 | 0.4280445966788662 | 0.7995425730322410 | T | T | T |
| 0.7299062820158042 | 0.4281644284843225 | 0.7618211127746832 | T | T | T |
| 0.8633919323821999 | 0.6747024940553317 | 0.7363483164146558 | T | T | T |
| 0.8015871135719337 | 0.6312533292816553 | 0.5768623668433577 | T | T | T |
| 0.6880481563666976 | 0.6457685674018450 | 0.4801958682201075 | T | T | T |
| 0.5822958193899055 | 0.6585660950048933 | 0.5971468210404538 | T | T | T |
| 0.6039615709268631 | 0.6632404353413719 | 0.7932656086999543 | T | T | T |
| 0.7295160485866035 | 0.6701064623758270 | 0.7309627093694999 | T | T | T |
| 0.8013223018464828 | 0.5577124823178394 | 0.7461885869033509 | T | T | T |
| 0.5849922183754472 | 0.5461324043356441 | 0.7050922844247793 | T | T | T |
| 0.9355663030529371 | 0.3677917838923150 | 0.9014305828685210 | T | T | T |
| 0.8975114351641480 | 0.4952749512179366 | 0.9032456603280110 | T | T | T |
| 0.8883542750255486 | 0.6284392147067592 | 0.9198407449691501 | T | T | T |
| 0.6821212353886992 | 0.3758501769608671 | 0.9327504221006748 | T | T | T |
| 0.6784281537541972 | 0.5079979968762061 | 0.8995780318801465 | T | T | T |
| 0.7038359736463136 | 0.6371968940905575 | 0.9220345550719102 | T | T | T |
| 0.4861357486349860 | 0.4568192375333311 | 0.7112804752061379 | T | T | T |
| 0.4840032892102855 | 0.6336310857670711 | 0.7216317595505899 | T | T | T |
| 0.6401605075486643 | 0.9371421610787465 | 0.2933549177713672 | T | T | T |
| 0.6908585790337654 | 0.9383544025003800 | 0.1116926968058749 | T | T | T |
| 0.7983965910314126 | 0.9492530673269215 | 0.9925721492216724 | T | T | T |
| 0.9031274431248235 | 0.9288003238084102 | 0.1103449601623367 | T | T | T |
| 0.8954028801647240 | 0.9408214496727965 | 0.3083914281870506 | T | T | T |
| 0.7696471524024560 | 0.9593616626653869 | 0.2647208995717207 | T | T | T |

**Structure files (CONTCAR) involved in this work:**

|                    |                    |                    |   |   |   |
|--------------------|--------------------|--------------------|---|---|---|
| 0.6415651556067559 | 0.1751714764072858 | 0.2555388664701752 | T | T | T |
| 0.6965842689624324 | 0.1504047119530156 | 0.0838690887804603 | T | T | T |
| 0.8092929196178815 | 0.1475223825683543 | 0.9830284423907258 | T | T | T |
| 0.9090625601264719 | 0.1706939961711811 | 0.1102731068855434 | T | T | T |
| 0.8975845747210940 | 0.1561317807367004 | 0.3059001172215332 | T | T | T |
| 0.7722217432771217 | 0.1471494312775903 | 0.2473486723372389 | T | T | T |
| 0.6805272109660336 | 0.0522957187284092 | 0.2161943243542837 | T | T | T |
| 0.9165284219762739 | 0.0486196373174081 | 0.1909755639902215 | T | T | T |
| 0.5661059452914259 | 0.8747658188914329 | 0.4287015641133252 | T | T | T |
| 0.5799814385022799 | 0.0068555232791994 | 0.4406667857523132 | T | T | T |
| 0.6044695500445627 | 0.1376572029201952 | 0.4375240665748592 | T | T | T |
| 0.8043122424093312 | 0.8603064309098443 | 0.3907472426746779 | T | T | T |
| 0.8127323754677604 | 0.9867091626428461 | 0.4486885270708214 | T | T | T |
| 0.8058692144524429 | 0.1203778188963298 | 0.4365645188127587 | T | T | T |
| 0.0107087301222251 | 0.9553978171444371 | 0.2208253711168808 | T | T | T |
| 0.0148859919556728 | 0.1365312810102495 | 0.2184138664047239 | T | T | T |
| 0.8578504694492750 | 0.0684046032834331 | 0.7918900104506790 | T | T | T |
| 0.8071150680742107 | 0.0607208073675380 | 0.6101306849826287 | T | T | T |
| 0.6999388943974623 | 0.0497307409097161 | 0.4905840163798487 | T | T | T |
| 0.5967253151135736 | 0.0761706299559393 | 0.6094207035389232 | T | T | T |
| 0.6026357088803422 | 0.0555058170813325 | 0.8066269688546797 | T | T | T |
| 0.7290183985076695 | 0.0378443220125888 | 0.7634219052482720 | T | T | T |
| 0.8539996614507785 | 0.8249483350887914 | 0.7632530484731817 | T | T | T |
| 0.8042598690963061 | 0.8574572793077095 | 0.5875649072469855 | T | T | T |
| 0.6892858165882672 | 0.8513765657554799 | 0.4897257949932623 | T | T | T |
| 0.5870754721828249 | 0.8288806754962152 | 0.6128295967375266 | T | T | T |
| 0.5998252038527170 | 0.8543658351975552 | 0.8061643138798686 | T | T | T |
| 0.7259500585033578 | 0.8607081214067591 | 0.7474909409170039 | T | T | T |
| 0.8244485218952988 | 0.9502581530711751 | 0.7239362134490861 | T | T | T |
| 0.5795001445953147 | 0.9542516002258523 | 0.6784528684340216 | T | T | T |
| 0.9346702347014499 | 0.1236176961492532 | 0.9288973063398771 | T | T | T |
| 0.9165424106749214 | 0.9925399637122467 | 0.9358001306363235 | T | T | T |
| 0.8957592927244562 | 0.8618026844131990 | 0.9434373088068497 | T | T | T |
| 0.6930987868413467 | 0.1362550670106231 | 0.8873993777025504 | T | T | T |
| 0.6848586760796280 | 0.0099249749518933 | 0.9470351922030034 | T | T | T |
| 0.6942168122407040 | 0.8760013910825961 | 0.9408834235067829 | T | T | T |
| 0.4874956155939500 | 0.0477358841277749 | 0.7174708235518921 | T | T | T |
| 0.4818097071179537 | 0.8675525804142126 | 0.7203822419455790 | T | T | T |
| 0.3559611545079449 | 0.4423535817041184 | 0.7081571766606771 | T | T | T |
| 0.3055324272095490 | 0.4275059101173895 | 0.8885386408443949 | T | T | T |
| 0.2046792353643312 | 0.4470227819378465 | 0.0155577898416936 | T | T | T |
| 0.1059830768876893 | 0.4278256880832956 | 0.8834849053741323 | T | T | T |
| 0.1054586201225547 | 0.4539463757327766 | 0.6862074155831266 | T | T | T |
| 0.2295031180760319 | 0.4702235011862115 | 0.7385455905004150 | T | T | T |
| 0.3562119392320255 | 0.6662274039528597 | 0.7293838445013989 | T | T | T |
| 0.3013179906710164 | 0.6674214068100781 | 0.9065032836144056 | T | T | T |
| 0.1917300821783954 | 0.6466245378774644 | 0.0131438730052267 | T | T | T |
| 0.0901620554344902 | 0.6742807980057890 | 0.8920110557839251 | T | T | T |
| 0.1023813130913283 | 0.6549016416606079 | 0.6967364378087595 | T | T | T |
| 0.2283255418515111 | 0.6356784674719407 | 0.7470427315015584 | T | T | T |
| 0.3206320059101628 | 0.5508609085194962 | 0.8146818416508381 | T | T | T |
| 0.0829350815521579 | 0.5510927971763024 | 0.8207248320192733 | T | T | T |
| 0.4309731740236344 | 0.3751637427939940 | 0.5791623497625977 | T | T | T |

**Structure files (CONTCAR) involved in this work:**

|                    |                    |                    |   |   |   |
|--------------------|--------------------|--------------------|---|---|---|
| 0.4169689097170277 | 0.5060521991679110 | 0.5579374383900557 | T | T | T |
| 0.4106263648979649 | 0.6390483064574326 | 0.5536113026354457 | T | T | T |
| 0.1954250720332027 | 0.3728109682141465 | 0.6092952975531958 | T | T | T |
| 0.1908747597399270 | 0.4999452646937499 | 0.5514705152265407 | T | T | T |
| 0.1913575584064517 | 0.6344858011928878 | 0.5544092236455640 | T | T | T |
| 0.9943919438183855 | 0.4545688324025647 | 0.7805196073292464 | T | T | T |
| 0.9850725590504510 | 0.6368619434054494 | 0.7818414999967658 | T | T | T |
| 0.1429256557558602 | 0.5593807433142786 | 0.2081879196188510 | T | T | T |
| 0.1993362645027332 | 0.5698147557988946 | 0.3850539331129283 | T | T | T |
| 0.3023300900720969 | 0.5660146511777953 | 0.5152114118741054 | T | T | T |
| 0.4029118507374250 | 0.5712259853314592 | 0.3860639124165033 | T | T | T |
| 0.4005008722166536 | 0.5545974569243981 | 0.1905883072568457 | T | T | T |
| 0.2725373313750623 | 0.5337917334934730 | 0.2294899807481414 | T | T | T |
| 0.1405847428896507 | 0.3305423671667995 | 0.2386123134211005 | T | T | T |
| 0.1934659188323238 | 0.3411959667026636 | 0.4161316101182848 | T | T | T |
| 0.3087283259562881 | 0.3537071773931046 | 0.5110948084436941 | T | T | T |
| 0.4122688394672949 | 0.3286001945157082 | 0.3941076631149727 | T | T | T |
| 0.3950686427822490 | 0.3406491543749652 | 0.1983325836139826 | T | T | T |
| 0.2703188894372772 | 0.3561648313106716 | 0.2547166941131991 | T | T | T |
| 0.1815097216394506 | 0.4495889368761823 | 0.3028639530506680 | T | T | T |
| 0.4145710856063758 | 0.4491126964038941 | 0.3116978075126582 | T | T | T |
| 0.0688069722108651 | 0.6227149733432142 | 0.0734156224141103 | T | T | T |
| 0.0846633503956724 | 0.4912883711338125 | 0.0551946792335656 | T | T | T |
| 0.1062915939542250 | 0.3594158927619375 | 0.0514278382606150 | T | T | T |
| 0.3102293124838624 | 0.6256229068996859 | 0.0953384837465023 | T | T | T |
| 0.3242639148768234 | 0.4949385596463003 | 0.0560608552489725 | T | T | T |
| 0.3023310021689838 | 0.3619927187295673 | 0.0599317163385962 | T | T | T |
| 0.5138568601026208 | 0.5367943797052632 | 0.2860185576700829 | T | T | T |
| 0.5136406799160156 | 0.3625446474901253 | 0.2761979457319015 | T | T | T |
| 0.4417158570046311 | 0.7505399209227264 | 0.6462114876671947 | T | T | T |
| 0.1937085306285340 | 0.7487801434051065 | 0.6519263101475445 | T | T | T |
| 0.2724136372258386 | 0.7490380168168542 | 0.0564997817239927 | T | T | T |
| 0.1079081223885936 | 0.7483507285306530 | 0.0531845022706321 | T | T | T |
| 0.0610283155826323 | 0.2495397133650528 | 0.1371506058548633 | T | T | T |
| 0.3047321959496045 | 0.2465668279224857 | 0.1531904713602685 | T | T | T |
| 0.2268349257661697 | 0.2514617482420576 | 0.5552504913015426 | T | T | T |
| 0.3902008298571360 | 0.2509439535293509 | 0.5510893557784939 | T | T | T |
| 0.5608788615937854 | 0.2513990212696058 | 0.3602923885740026 | T | T | T |
| 0.8081469495464404 | 0.2447801949611730 | 0.3760568567873506 | T | T | T |
| 0.7262231786464994 | 0.2522394790310472 | 0.9607927994111307 | T | T | T |
| 0.8937808449726958 | 0.2478998533645722 | 0.9503761451091819 | T | T | T |
| 0.9342536612341164 | 0.7464814288574289 | 0.8666481137698696 | T | T | T |
| 0.6843968798556688 | 0.7585385795957578 | 0.8616791119891474 | T | T | T |
| 0.7737908818884449 | 0.7480829852789839 | 0.4890084927028440 | T | T | T |
| 0.6045882330184114 | 0.7496666027474177 | 0.4571288114146057 | T | T | T |
| 0.9837285077247913 | 0.6250816838415005 | 0.3910899287631295 | T | T | T |
| 0.8862211180627710 | 0.4010188420212870 | 0.5918965563732712 | T | T | T |
| 0.9602652028134457 | 0.3824312813493620 | 0.5771460078440782 | T | T | T |
| 0.9352068717857023 | 0.5942135908967288 | 0.3258792694053412 | T | T | T |
| 0.9549311162553664 | 0.5871866053785624 | 0.5323982276837214 | T | T | T |
| 0.9175076888051024 | 0.6640995219968389 | 0.4920836512769995 | T | T | T |
| 0.0026490219851922 | 0.6639645780338483 | 0.5343817585421746 | T | T | T |
| 0.0275146792484264 | 0.6038047169862750 | 0.3873279965322283 | T | T | T |

**Structure files (CONTCAR) involved in this work:**

0.9640830995422078 0.6354159612777792 0.4944329026783194 T T T

**Figure 2(a) Ga-TS**

1.0000000000000000

20.0219993591000005 0.0000000000000000 0.0000000000000000

0.0000000000000000 19.8990001678000006 0.0000000000000000

0.0000000000000000 0.0000000000000000 13.3830003737999998

93 3 193 1 6 1

**Selective dynamics****Direct**

0.4209944805352205 0.0572795870221403 0.6471784574613639 T T T

0.2998597059628265 0.0262198543695733 0.7876014595103276 T T T

0.2793702488350928 0.0590103178824760 0.0115093248993311 T T T

0.1196766003907929 0.0609752658566499 0.0112644650680715 T T T

0.0661739067382213 0.0289734023974808 0.7976963963818776 T T T

0.1753126477293510 0.0562676005194355 0.6500594310027182 T T T

0.4183295604157205 0.8270506614331163 0.6684463865126937 T T T

0.3007454105143270 0.8675875249703823 0.8077848677792790 T T T

0.2666403834685550 0.8274215221969681 0.0282157832817465 T T T

0.1116409763652948 0.8250704183602631 0.0164603594519907 T T T

0.0602010540060094 0.8695174741227600 0.8017969920807936 T T T

0.1777139129537829 0.8275033897845724 0.6721249051361522 T T T

0.0750805643152301 0.9407347943870229 0.1496578395734272 T T T

0.1959639324088999 0.9717560816104419 0.2916952131319122 T T T

0.2158358021441311 0.9375196397427347 0.5135594318073063 T T T

0.3752977600107413 0.9343127829097665 0.5145220343658794 T T T

0.4294367666604121 0.9692328433683666 0.3036650625041290 T T T

0.3205267401785308 0.9434712335518483 0.1539711715429681 T T T

0.0783075667649060 0.1708904493423961 0.1635303453099392 T T T

0.1955904981022138 0.1291520435674885 0.3059906852182668 T T T

0.2301959592438100 0.1727141820037626 0.5231538064816734 T T T

0.3848350843589026 0.1740069938240914 0.5116114681475721 T T T

0.4359957757034283 0.1275377491327198 0.3013573422488707 T T T

0.3183750313133051 0.1665858191858031 0.1702737801668341 T T T

0.5781451895290231 0.5571290205536487 0.3487615938526300 T T T

0.6899041933765981 0.5367282210442799 0.1920401869198267 T T T

0.7122322896414124 0.5624320029583683 0.9736428484574674 T T T

0.8707929797389342 0.5570922240599425 0.9733901218268826 T T T

0.9336226703121489 0.5285666556289688 0.1856452039925630 T T T

0.5775834941234933 0.3294902940067291 0.3297809667794683 T T T

0.7051993296883023 0.3774242069398104 0.2173843312640892 T T T

0.7354903282704792 0.3314347853270627 0.9936622359867053 T T T

0.8873420382516582 0.3255093377476023 0.9787793159237780 T T T

0.9366875674698981 0.3706501627392517 0.1950582304825185 T T T

0.9242999386693057 0.4345875218621592 0.8350154666188448 T T T

0.7810224716490269 0.4451397604871696 0.4776423730380502 T T T

0.6227931311281781 0.4330505297632440 0.4890313026823931 T T T

0.5657594096142650 0.4668632358253114 0.7040128128392809 T T T

0.6736771896037785 0.4339727139099451 0.8468006189341680 T T T

0.9166685519390925 0.6708130852460229 0.8253212801003141 T T T

0.7958823955682873 0.6318282042981518 0.7029543357082090 T T T

0.7679585106231265 0.6677541038415105 0.4821402601382653 T T T

0.6127041123330627 0.6705907390442801 0.4838469753146534 T T T

0.5663924464815350 0.6254691918797075 0.7031126471298175 T T T



**Structure files (CONTCAR) involved in this work:**

|                    |                    |                    |   |   |   |
|--------------------|--------------------|--------------------|---|---|---|
| 0.6785114234563203 | 0.6812954543571064 | 0.8317979102095420 | T | T | T |
| 0.5743596303150417 | 0.9435424051118237 | 0.3641635193439195 | T | T | T |
| 0.6949401930722053 | 0.9720417360589145 | 0.2222914528615878 | T | T | T |
| 0.7165421495382202 | 0.9447656872534658 | 0.9974244585996924 | T | T | T |
| 0.8769163542230075 | 0.9327906728329513 | 0.9949923630703298 | T | T | T |
| 0.9308721554221536 | 0.9687746242614322 | 0.2066764626532555 | T | T | T |
| 0.8201319738902845 | 0.9357569203805569 | 0.3526774275317839 | T | T | T |
| 0.5800380577899761 | 0.1749099168217589 | 0.3343053805989967 | T | T | T |
| 0.6994220833351215 | 0.1314363012700270 | 0.2033466241461579 | T | T | T |
| 0.7306799422771868 | 0.1721652582446469 | 0.9818708181912331 | T | T | T |
| 0.8855918514560212 | 0.1719280387197561 | 0.9940176570707880 | T | T | T |
| 0.9337698142261489 | 0.1276989963251491 | 0.2065771101357761 | T | T | T |
| 0.8207604530824991 | 0.1703749662219382 | 0.3430909045192861 | T | T | T |
| 0.9225715890819757 | 0.0564485393447014 | 0.8611701847916818 | T | T | T |
| 0.8034862151352429 | 0.0300007859295277 | 0.7217628450053722 | T | T | T |
| 0.7804628629262829 | 0.0550545158521316 | 0.4950103566081570 | T | T | T |
| 0.6203105614397375 | 0.0680366807900300 | 0.4939553398064417 | T | T | T |
| 0.5658704839657067 | 0.0335171920425337 | 0.7026390121575347 | T | T | T |
| 0.6768903099863870 | 0.0617295248307241 | 0.8508020956658716 | T | T | T |
| 0.9156966461167965 | 0.8237392020388302 | 0.8399793881875123 | T | T | T |
| 0.7995780373227755 | 0.8732715218914208 | 0.7080233020361678 | T | T | T |
| 0.7675145109615018 | 0.8291343149278114 | 0.4904147321318473 | T | T | T |
| 0.6116526779057689 | 0.8258138651994578 | 0.4970641449818241 | T | T | T |
| 0.5610460667285920 | 0.8763705846868198 | 0.7036402661086567 | T | T | T |
| 0.6743759453254673 | 0.8371709991386017 | 0.8403549704446162 | T | T | T |
| 0.4218113088125878 | 0.4459898167951495 | 0.6372724646293716 | T | T | T |
| 0.3019599544180702 | 0.4723999556830229 | 0.7843998611054142 | T | T | T |
| 0.2847027367429336 | 0.4309577580844695 | 0.0024433943453441 | T | T | T |
| 0.1259223714568876 | 0.4297234828790033 | 0.9993030846402545 | T | T | T |
| 0.0726606921957795 | 0.4718104421621486 | 0.7925293403512235 | T | T | T |
| 0.1798818179748365 | 0.4487762110073754 | 0.6417456373782185 | T | T | T |
| 0.4234756937261752 | 0.6719425773736428 | 0.6576549301876172 | T | T | T |
| 0.3005101734668834 | 0.6292405550678791 | 0.7940970820212898 | T | T | T |
| 0.2691436277626648 | 0.6714620891850284 | 0.0123047865827095 | T | T | T |
| 0.1150039384623816 | 0.6718019678780137 | 0.0031480875029201 | T | T | T |
| 0.0645137572897336 | 0.6291498464386903 | 0.7945716884609231 | T | T | T |
| 0.1780906023285606 | 0.6690796786355556 | 0.6575303244513534 | T | T | T |
| 0.0784950950417276 | 0.5521062366963467 | 0.1316549188563480 | T | T | T |
| 0.1998474249185637 | 0.5275222565824786 | 0.2757781722263798 | T | T | T |
| 0.2202899282068217 | 0.5671914654867319 | 0.4984107358289875 | T | T | T |
| 0.3803724004866140 | 0.5700018595387136 | 0.5012455774605541 | T | T | T |
| 0.4296585073681836 | 0.5262182926541190 | 0.2930805891218118 | T | T | T |
| 0.3265929235195811 | 0.5517656926903776 | 0.1372946458308360 | T | T | T |
| 0.0813636159101918 | 0.3257116510290256 | 0.1534670799499094 | T | T | T |
| 0.1978560784178681 | 0.3691627817962711 | 0.2975361730264434 | T | T | T |
| 0.2309189793211374 | 0.3295733651197432 | 0.5180801641517833 | T | T | T |
| 0.3853381304544612 | 0.3272888511373478 | 0.5071304356134574 | T | T | T |
| 0.4329674722829187 | 0.3696298583975042 | 0.2933693575987667 | T | T | T |
| 0.3189061387497077 | 0.3248556505581259 | 0.1629550419858067 | T | T | T |
| 0.8161840914927849 | 0.5676810865342363 | 0.3193213250790936 | T | T | T |
| 0.8294264083926666 | 0.3285642093638864 | 0.3533886731550755 | T | T | T |
| 0.7957165834421811 | 0.4737436438550700 | 0.7203178568558621 | T | T | T |
| 0.3550653811313075 | 0.0620508032511009 | 0.7171620182912686 | T | T | T |

**Structure files (CONTCAR) involved in this work:**

|                    |                    |                    |   |   |   |
|--------------------|--------------------|--------------------|---|---|---|
| 0.2991601075131767 | 0.0645255397766861 | 0.8944830748642846 | T | T | T |
| 0.1993214577570424 | 0.0490024330948052 | 0.0257891979078909 | T | T | T |
| 0.1003697375758059 | 0.0647735411645109 | 0.8940254520985509 | T | T | T |
| 0.1003814882743212 | 0.0574471202475809 | 0.6962049504350271 | T | T | T |
| 0.2264333852272817 | 0.0322108732231629 | 0.7373013462153526 | T | T | T |
| 0.3564752986293317 | 0.8252299506795736 | 0.7467938925869354 | T | T | T |
| 0.3034183947233096 | 0.8436338633802589 | 0.9230961156258198 | T | T | T |
| 0.1888005830377473 | 0.8509977666990847 | 0.0204000105693115 | T | T | T |
| 0.0832990190816228 | 0.8325130790148102 | 0.9038872911898590 | T | T | T |
| 0.1002297970951233 | 0.8360152076777625 | 0.7077190819258411 | T | T | T |
| 0.2266856875320864 | 0.8526294577211390 | 0.7619048299389237 | T | T | T |
| 0.3180599850358355 | 0.9471065334713181 | 0.8006536258896266 | T | T | T |
| 0.0784088118987020 | 0.9485588244129252 | 0.8072699337540248 | T | T | T |
| 0.4291511078166859 | 0.1269297488531851 | 0.5849272215693982 | T | T | T |
| 0.4158378266038349 | 0.9949505050566214 | 0.5686184115898659 | T | T | T |
| 0.3951273935303306 | 0.8629097386393846 | 0.5650600525785378 | T | T | T |
| 0.1932947280648143 | 0.1312771007405655 | 0.6114735117911771 | T | T | T |
| 0.1778359242289217 | 0.0034332980390684 | 0.5573216919321160 | T | T | T |
| 0.1912792589749981 | 0.8697395983834694 | 0.5705016259847719 | T | T | T |
| 0.9871814568908835 | 0.0458468168202815 | 0.7897878379496827 | T | T | T |
| 0.9801956658629081 | 0.8592829149959831 | 0.7868563684133490 | T | T | T |
| 0.1412149773628877 | 0.9372937380913956 | 0.2191148898637794 | T | T | T |
| 0.1971199329960402 | 0.9301640338991999 | 0.3961926862590832 | T | T | T |
| 0.2957488740716629 | 0.9476786734997060 | 0.5287896678860258 | T | T | T |
| 0.3949436065394157 | 0.9301730380118340 | 0.3973305361842749 | T | T | T |
| 0.3954480890382777 | 0.9441732415171820 | 0.1999514338558369 | T | T | T |
| 0.2693161980914875 | 0.9684861966096401 | 0.2406185356546864 | T | T | T |
| 0.1415228162146893 | 0.1692260071254501 | 0.2391129654847442 | T | T | T |
| 0.1926475492565622 | 0.1602667913372665 | 0.4175636281930504 | T | T | T |
| 0.3075335357556677 | 0.1481147618867071 | 0.5142717709677621 | T | T | T |
| 0.4127283211159907 | 0.1705903506836832 | 0.3982817758613832 | T | T | T |
| 0.3958367654212897 | 0.1548895190201031 | 0.2033933536671755 | T | T | T |
| 0.2701821427033109 | 0.1385381887436864 | 0.2594366590727806 | T | T | T |
| 0.1763804749755169 | 0.0498837064177925 | 0.3107244454971552 | T | T | T |
| 0.4175542093192118 | 0.0491837486583518 | 0.3200405853653619 | T | T | T |
| 0.0665133451764615 | 0.8685242082971122 | 0.0937331350158123 | T | T | T |
| 0.0805318143129921 | 0.9989309586252954 | 0.0644802396966096 | T | T | T |
| 0.0972886394918377 | 0.1315492495729859 | 0.0610988320654786 | T | T | T |
| 0.3028148819068328 | 0.8675237029332862 | 0.1185411017548545 | T | T | T |
| 0.3170547295518615 | 0.9938502721821594 | 0.0584505043933246 | T | T | T |
| 0.3031660084880998 | 0.1275528344650758 | 0.0663074571080658 | T | T | T |
| 0.5084234534153690 | 0.9525031944839346 | 0.2950646175722280 | T | T | T |
| 0.5159154228985260 | 0.1362996553259102 | 0.2849741635068270 | T | T | T |
| 0.6334262080529025 | 0.5703477254881595 | 0.2642065856867800 | T | T | T |
| 0.6718647946565164 | 0.5591855902996539 | 0.0779653195031467 | T | T | T |
| 0.7915771090203599 | 0.5476824015101156 | 0.9914105065143701 | T | T | T |
| 0.9125675130407298 | 0.5582247265373894 | 0.0763236266161996 | T | T | T |
| 0.8980959450169047 | 0.5656097765305150 | 0.2771141063702190 | T | T | T |
| 0.7617972778374442 | 0.5656703236018495 | 0.2205306479353921 | T | T | T |
| 0.6396400041424978 | 0.3348303450171213 | 0.2536113445459565 | T | T | T |
| 0.7281092773355501 | 0.3431959857961810 | 0.1122362860689368 | T | T | T |
| 0.8114853658332428 | 0.3531549570751744 | 0.9609185543261551 | T | T | T |
| 0.9110702233353506 | 0.3334197042883828 | 0.0930160608614648 | T | T | T |

**Structure files (CONTCAR) involved in this work:**

|                    |                    |                    |   |   |   |
|--------------------|--------------------|--------------------|---|---|---|
| 0.9053156629678784 | 0.3375008890269032 | 0.2930901372110923 | T | T | T |
| 0.7641663977443445 | 0.3724439043592233 | 0.2983058539020222 | T | T | T |
| 0.6829702313044298 | 0.4550704083935624 | 0.2001239298317384 | T | T | T |
| 0.9161314405031662 | 0.4491533810467119 | 0.1843239536222435 | T | T | T |
| 0.5648869763971651 | 0.6264501471956653 | 0.4111009898517737 | T | T | T |
| 0.6021453402552834 | 0.5003727178151209 | 0.4285869385133906 | T | T | T |
| 0.5930597572261026 | 0.3669672467920632 | 0.4351366577258924 | T | T | T |
| 0.8165286869855010 | 0.6435206110942507 | 0.3916430102928000 | T | T | T |
| 0.7973952552540170 | 0.5029307921176325 | 0.4016953489236814 | T | T | T |
| 0.8312996527044250 | 0.3765936699534069 | 0.4722916563140556 | T | T | T |
| 0.0139885194954657 | 0.5409130791461457 | 0.2017568230701591 | T | T | T |
| 0.0183775434568817 | 0.3663303013770009 | 0.1986470391471078 | T | T | T |
| 0.8712852074389156 | 0.4229699199991169 | 0.7403946447483817 | T | T | T |
| 0.8146826671662160 | 0.4674106127016643 | 0.5891181035496368 | T | T | T |
| 0.7038199919511823 | 0.4270885863318423 | 0.4962924232016007 | T | T | T |
| 0.5930653484419859 | 0.4345174745157096 | 0.6008594098523835 | T | T | T |
| 0.5985161761116277 | 0.4287322143795618 | 0.7993258522085828 | T | T | T |
| 0.7289797100163733 | 0.4275484091799508 | 0.7593688614834330 | T | T | T |
| 0.8627901948432848 | 0.6739434863745912 | 0.7348433761807321 | T | T | T |
| 0.7956354430075192 | 0.6296006307307268 | 0.5815585498633062 | T | T | T |
| 0.6901286195036055 | 0.6476564011974910 | 0.4646351198006183 | T | T | T |
| 0.5925091779961883 | 0.6588261886370846 | 0.5996665880756028 | T | T | T |
| 0.6027355289431594 | 0.6625439611121746 | 0.7967489743417226 | T | T | T |
| 0.7287610915039074 | 0.6720294664404977 | 0.7367266894010891 | T | T | T |
| 0.7989993403262035 | 0.5574612912283524 | 0.7500786239921897 | T | T | T |
| 0.5851656093144613 | 0.5462854062356098 | 0.7049456125482587 | T | T | T |
| 0.9350135437487340 | 0.3672569913181046 | 0.9008776022403410 | T | T | T |
| 0.8957654000026052 | 0.4947800109121284 | 0.9029805898785979 | T | T | T |
| 0.8879965132069312 | 0.6276136964528025 | 0.9178970338992113 | T | T | T |
| 0.6818263758560721 | 0.3750707048745965 | 0.9304661447303020 | T | T | T |
| 0.6802093081138256 | 0.5074899939728706 | 0.8987817258590213 | T | T | T |
| 0.7031256371041731 | 0.6368001997066361 | 0.9256440094150326 | T | T | T |
| 0.4851246102080740 | 0.4579840858412659 | 0.7101537158475475 | T | T | T |
| 0.4857416583128022 | 0.6350572423288067 | 0.7132826886292514 | T | T | T |
| 0.6394990835392967 | 0.9366357172566147 | 0.2930532381492916 | T | T | T |
| 0.6889954138548456 | 0.9412634428532163 | 0.1108196436172679 | T | T | T |
| 0.7975491534398441 | 0.9487326492754029 | 0.9928745139267471 | T | T | T |
| 0.9028426465235898 | 0.9286835259494201 | 0.1094572051519650 | T | T | T |
| 0.8954457254031293 | 0.9402681770772108 | 0.3076788088246794 | T | T | T |
| 0.7693718486134777 | 0.9550491087004540 | 0.2627141722239926 | T | T | T |
| 0.6410262584953802 | 0.1754130171791661 | 0.2552607834667429 | T | T | T |
| 0.6965844491473030 | 0.1473204975078605 | 0.0850395035436589 | T | T | T |
| 0.8084224750006904 | 0.1473978698127269 | 0.9824885749185754 | T | T | T |
| 0.9079642922001357 | 0.1704489643470952 | 0.1103427397891087 | T | T | T |
| 0.8976273865878615 | 0.1556282127056660 | 0.3064365729833997 | T | T | T |
| 0.7721522355734276 | 0.1501912054728583 | 0.2486101910600376 | T | T | T |
| 0.6827433294949578 | 0.0524826942207324 | 0.2229187439154718 | T | T | T |
| 0.9162138365605392 | 0.0483822318843141 | 0.1907720892579931 | T | T | T |
| 0.5657429584883760 | 0.8749400722090764 | 0.4290164895625385 | T | T | T |
| 0.5798813657884789 | 0.0070934502685537 | 0.4400103449948111 | T | T | T |
| 0.6035924726494436 | 0.1381614001797668 | 0.4372221081426064 | T | T | T |
| 0.8058650581976077 | 0.8595432340772323 | 0.3928981355767108 | T | T | T |
| 0.8113508611046258 | 0.9871881463608669 | 0.4456756102128335 | T | T | T |

**Structure files (CONTCAR) involved in this work:**

|                    |                    |                    |   |   |   |
|--------------------|--------------------|--------------------|---|---|---|
| 0.8053413730138388 | 0.1211126716709215 | 0.4372274612739087 | T | T | T |
| 0.0104953158745395 | 0.9547469726845180 | 0.2196165399107001 | T | T | T |
| 0.0143764046077602 | 0.1363886642440627 | 0.2180962375772051 | T | T | T |
| 0.8572415135680688 | 0.0689537231214639 | 0.7916064957577253 | T | T | T |
| 0.8077954357600862 | 0.0588564612148592 | 0.6090958051136003 | T | T | T |
| 0.6994003810186493 | 0.0505151729400971 | 0.4914103310770924 | T | T | T |
| 0.5955227120980893 | 0.0761451695172354 | 0.6089296421633255 | T | T | T |
| 0.6016498995042268 | 0.0562701407524300 | 0.8062002336637496 | T | T | T |
| 0.7279040914564291 | 0.0412013258755462 | 0.7614930994688283 | T | T | T |
| 0.8532634489607864 | 0.8247333041128193 | 0.7627932803743671 | T | T | T |
| 0.8026415551224988 | 0.8598541694202876 | 0.5892491904589485 | T | T | T |
| 0.6891139271826526 | 0.8503255633422432 | 0.4882888501977672 | T | T | T |
| 0.5872399835651695 | 0.8289593683936790 | 0.6127313121060132 | T | T | T |
| 0.5981027661623929 | 0.8538437617278931 | 0.8062903884488645 | T | T | T |
| 0.7246049711006222 | 0.8587281225859593 | 0.7495118741750639 | T | T | T |
| 0.8215520045417908 | 0.9504678965934956 | 0.7288289076064055 | T | T | T |
| 0.5787203461724966 | 0.9542315214324526 | 0.6790335417234459 | T | T | T |
| 0.9340891093546174 | 0.1225451946521042 | 0.9300926791515958 | T | T | T |
| 0.9156337621565533 | 0.9915014979798892 | 0.9339614056668557 | T | T | T |
| 0.8946744521524336 | 0.8609596150640252 | 0.9433330866426174 | T | T | T |
| 0.6914793318400363 | 0.1378998900329792 | 0.8882913363743983 | T | T | T |
| 0.6852748348939115 | 0.0111104065463589 | 0.9450192661939182 | T | T | T |
| 0.6919704939122679 | 0.8772651168164700 | 0.9416931926836083 | T | T | T |
| 0.4864210167536916 | 0.0474724274997603 | 0.7169969911646957 | T | T | T |
| 0.4808564151404412 | 0.8670831965927821 | 0.7184443106653018 | T | T | T |
| 0.3550814686101296 | 0.4426252410405785 | 0.7054112529818415 | T | T | T |
| 0.3039073900211889 | 0.4265693131784587 | 0.8846820903055460 | T | T | T |
| 0.2049434340309896 | 0.4444117323955010 | 0.0151976175674844 | T | T | T |
| 0.1071720560658884 | 0.4282177972820670 | 0.8809406836022908 | T | T | T |
| 0.1036971765385316 | 0.4532409453238951 | 0.6837465808287190 | T | T | T |
| 0.2282390584051654 | 0.4694381186900964 | 0.7339555506425586 | T | T | T |
| 0.3565645524099674 | 0.6637259887456048 | 0.7246076042119927 | T | T | T |
| 0.2997816826851797 | 0.6687216535911087 | 0.8999201412023580 | T | T | T |
| 0.1919386964691668 | 0.6453874987694541 | 0.0083832723288513 | T | T | T |
| 0.0911004667339209 | 0.6746652976814929 | 0.8866902374764980 | T | T | T |
| 0.1000552422993092 | 0.6543942646044042 | 0.6903444802683788 | T | T | T |
| 0.2273395890870992 | 0.6354907444631566 | 0.7403086566098680 | T | T | T |
| 0.3178309084434435 | 0.5504073641526032 | 0.8124006739863211 | T | T | T |
| 0.0831363989072561 | 0.5512317817744786 | 0.8167597650187486 | T | T | T |
| 0.4307842402997122 | 0.3756022835983750 | 0.5773002891851668 | T | T | T |
| 0.4160174754905631 | 0.5064289848853769 | 0.5556801609795082 | T | T | T |
| 0.4098314611946327 | 0.6392350760867266 | 0.5479752125688444 | T | T | T |
| 0.1932560269409288 | 0.3728049074088103 | 0.6040541185643834 | T | T | T |
| 0.1875413246409402 | 0.5003581386200330 | 0.5482769751764436 | T | T | T |
| 0.1879936023575807 | 0.6347322838372311 | 0.5481156294117092 | T | T | T |
| 0.9938110852040370 | 0.4549561112671852 | 0.7816035581389943 | T | T | T |
| 0.9845871582047729 | 0.6372238980871840 | 0.7782190307159375 | T | T | T |
| 0.1436798583770351 | 0.5601596442075742 | 0.2032844328981859 | T | T | T |
| 0.2003397418771753 | 0.5689208316081017 | 0.3809794189038390 | T | T | T |
| 0.2999836866030274 | 0.5661347796721501 | 0.5189155330646081 | T | T | T |
| 0.3955954353521969 | 0.5694113530041728 | 0.3828527098957078 | T | T | T |
| 0.4004727139388520 | 0.5541314200175748 | 0.1873498327581227 | T | T | T |
| 0.2726392454347391 | 0.5344098769010333 | 0.2245225653187945 | T | T | T |

**Structure files (CONTCAR) involved in this work:**

|                    |                    |                    |   |   |   |
|--------------------|--------------------|--------------------|---|---|---|
| 0.1425505255906352 | 0.3294528207423751 | 0.2327987834069157 | T | T | T |
| 0.1944704120224444 | 0.3410024974567537 | 0.4110824516615461 | T | T | T |
| 0.3082843513994613 | 0.3541361642868672 | 0.5102941696157384 | T | T | T |
| 0.4114785379694357 | 0.3279410660524667 | 0.3927368258627453 | T | T | T |
| 0.3960250406656275 | 0.3374006330370123 | 0.1960402975075440 | T | T | T |
| 0.2715849937782887 | 0.3565806106832874 | 0.2503169850715316 | T | T | T |
| 0.1820277102689619 | 0.4493343744372698 | 0.2973040009893077 | T | T | T |
| 0.4098140611829202 | 0.4474751812902307 | 0.3073873022089180 | T | T | T |
| 0.0687154556245840 | 0.6208230510529479 | 0.0669972290485700 | T | T | T |
| 0.0849947571160198 | 0.4898246474649383 | 0.0536657149865728 | T | T | T |
| 0.1052482441611140 | 0.3577564849587078 | 0.0468698570947600 | T | T | T |
| 0.3115178837640748 | 0.6244170139428038 | 0.0875341555500639 | T | T | T |
| 0.3247686813280302 | 0.4935085628502987 | 0.0522723799099142 | T | T | T |
| 0.3045414507499332 | 0.3605181141894405 | 0.0556976709454271 | T | T | T |
| 0.5096434390477028 | 0.5344918716320884 | 0.2940355822468537 | T | T | T |
| 0.5128177334001982 | 0.3640519142396916 | 0.2763670829183270 | T | T | T |
| 0.4402070081203232 | 0.7507443549223137 | 0.6420513870279565 | T | T | T |
| 0.1916538452052754 | 0.7487749477286522 | 0.6471578782381100 | T | T | T |
| 0.2722933081099839 | 0.7479157398863344 | 0.0534898185182554 | T | T | T |
| 0.1079948546971773 | 0.7466348174359809 | 0.0496969077554671 | T | T | T |
| 0.0618198493925363 | 0.2479168787109174 | 0.1334373330681885 | T | T | T |
| 0.3038971126624068 | 0.2454849346740317 | 0.1504269158871915 | T | T | T |
| 0.2261284481261977 | 0.2516862196616582 | 0.5517470202788448 | T | T | T |
| 0.3895926153822368 | 0.2511930745369955 | 0.5503012897011519 | T | T | T |
| 0.5601444314825605 | 0.2520624264200795 | 0.3582501537962183 | T | T | T |
| 0.8107779358407979 | 0.2460251276530065 | 0.3789268086180214 | T | T | T |
| 0.7247815204761605 | 0.2525006910222765 | 0.9680013141310811 | T | T | T |
| 0.8932967728546414 | 0.2469379508012727 | 0.9482217322008540 | T | T | T |
| 0.9337948088481245 | 0.7459230424502749 | 0.8651898064752228 | T | T | T |
| 0.6814768915228976 | 0.7586731882583647 | 0.8674375368830547 | T | T | T |
| 0.7760251810587024 | 0.7484779738021589 | 0.4936866049267759 | T | T | T |
| 0.6036955323266022 | 0.7495032527799521 | 0.4566548753274534 | T | T | T |
| 0.0101276833864261 | 0.6680972907525528 | 0.4834473903368097 | T | T | T |
| 0.8870338540316218 | 0.4033127440213512 | 0.5911399507710925 | T | T | T |
| 0.9613781086240216 | 0.3855358372573023 | 0.5773082360335642 | T | T | T |
| 0.0370186642417321 | 0.6350315327160064 | 0.4472352201447989 | T | T | T |
| 0.9053525629754594 | 0.6223513509505937 | 0.5024815132821820 | T | T | T |
| 0.9305837351500081 | 0.6407118820995704 | 0.3699562934807592 | T | T | T |
| 0.9064851219872450 | 0.7112475534069342 | 0.4569283624215987 | T | T | T |
| 0.0203821295128600 | 0.6619540161750141 | 0.5548053532550131 | T | T | T |
| 0.9173329907492027 | 0.6583976323196878 | 0.4442941865929744 | T | T | T |

**Figure 2(a) Ga-FS**

1.0000000000000000

20.0219993591000005 0.0000000000000000 0.0000000000000000

0.0000000000000000 19.8990001678000006 0.0000000000000000

0.0000000000000000 0.0000000000000000 13.3830003737999998

93 3 193 1 6 1

**Direct**

0.4222432230342856 0.0572897720387266 0.6483779820160794

0.3016510458160340 0.0264746843556360 0.7891521447634756

0.2799699590334399 0.0591628329698498 0.0125250208757969

0.1204172468645082 0.0622373101567470 0.0120719561767850

0.0674798676783037 0.0283822806115568 0.7989780527182875

**Structure files (CONTCAR) involved in this work:**

|                    |                    |                    |
|--------------------|--------------------|--------------------|
| 0.1769713394382333 | 0.0552997944209552 | 0.6514576653385266 |
| 0.4192319812620253 | 0.8277090724334780 | 0.6695792943116643 |
| 0.3024737834197347 | 0.8684298758173949 | 0.8097627242212478 |
| 0.2675983786726069 | 0.8279357328071915 | 0.0299763576279308 |
| 0.1125882016213245 | 0.8257462232200098 | 0.0183655308623642 |
| 0.0619734626382478 | 0.8690739038090326 | 0.8034433141991627 |
| 0.1798348859862667 | 0.8278386655949300 | 0.6740967867182758 |
| 0.0756400301200773 | 0.9424214890176436 | 0.1506624083647374 |
| 0.1966152315462822 | 0.9723568144161787 | 0.2935027718935788 |
| 0.2168797248622295 | 0.9369555109791549 | 0.5141303717290266 |
| 0.3762872759293933 | 0.9344265715952575 | 0.5153026959944912 |
| 0.4305680949365641 | 0.9697935121296494 | 0.3045056852747920 |
| 0.3210734097030570 | 0.9440183009201789 | 0.1557994186835115 |
| 0.0792739353540396 | 0.1715534182592130 | 0.1644558284205581 |
| 0.1960988333648809 | 0.1296407970103923 | 0.3086674496590727 |
| 0.2319804322929790 | 0.1727194865884634 | 0.5256671625139578 |
| 0.3866633326010399 | 0.1741434526311341 | 0.5131626587963526 |
| 0.4364264906476689 | 0.1281590742013699 | 0.3019471110245938 |
| 0.3181534713780697 | 0.1668029846279430 | 0.1714932750018065 |
| 0.5770207162478688 | 0.5550844432744688 | 0.3520744636790434 |
| 0.6882719781760239 | 0.5374900223241568 | 0.1923154396708701 |
| 0.7130323277359286 | 0.5628888974072008 | 0.9749496324878723 |
| 0.8709127895097577 | 0.5571910376161118 | 0.9739644241258926 |
| 0.9333313051849870 | 0.5265740986673079 | 0.1845982991745324 |
| 0.5768100046161383 | 0.3303419236844325 | 0.3296655651069934 |
| 0.7062107746749243 | 0.3774499218744807 | 0.2183734303261655 |
| 0.7367973630223552 | 0.3313155463255871 | 0.9957444178943998 |
| 0.8885446097412176 | 0.3246316027418092 | 0.9785938580330374 |
| 0.9369695437642367 | 0.3695724159037970 | 0.1941418108344868 |
| 0.9244627901214493 | 0.4348992676053536 | 0.8354790606024524 |
| 0.7797681140195543 | 0.4439459570788116 | 0.4793982587198359 |
| 0.6225347878303829 | 0.4317806869649121 | 0.4918484048920828 |
| 0.5664921219217541 | 0.4657274223186808 | 0.7065747420724915 |
| 0.6748242807071592 | 0.4340588261334624 | 0.8491417999854127 |
| 0.9181595576759007 | 0.6699445208901782 | 0.8257983559482829 |
| 0.7971845002764312 | 0.6320032074767876 | 0.7047569825246142 |
| 0.7672378689026021 | 0.6681599206532413 | 0.4844302903181169 |
| 0.6153064936186587 | 0.6693945700062778 | 0.4815864069204673 |
| 0.5709226065254991 | 0.6243374240244269 | 0.7014836266378935 |
| 0.6803915593895311 | 0.6820536632499948 | 0.8338908253099830 |
| 0.5753549844358377 | 0.9433496139354322 | 0.3640769566556621 |
| 0.6956482195653868 | 0.9728659987816096 | 0.2221112819048646 |
| 0.7179227020197361 | 0.9455970718702571 | 0.9973276309914836 |
| 0.8782094440353004 | 0.9323159138357946 | 0.9956391032465161 |
| 0.9313704230499659 | 0.9690843061063741 | 0.2073609720518085 |
| 0.8205595249724381 | 0.9363922942208862 | 0.3530698902982187 |
| 0.5803660554539311 | 0.1753157062200346 | 0.3333445355170342 |
| 0.6997930881083813 | 0.1320583455631701 | 0.2025852608287177 |
| 0.7315503728308489 | 0.1724267138505547 | 0.9809946705530392 |
| 0.8863851526189077 | 0.1714640042292879 | 0.9921838034904832 |
| 0.9342739142764465 | 0.1278490444402479 | 0.2052363449086268 |
| 0.8214593880955305 | 0.1704225990184727 | 0.3424216181552643 |
| 0.9237433808659304 | 0.0553315897164091 | 0.8607304550750906 |

**Structure files (CONTCAR) involved in this work:**

|                    |                    |                    |
|--------------------|--------------------|--------------------|
| 0.8041357386203578 | 0.0294684841190803 | 0.7209438164192880 |
| 0.7810920198861198 | 0.0551668118616242 | 0.4949948253323795 |
| 0.6208107645881599 | 0.0682187133634009 | 0.4936910275455637 |
| 0.5671430747959766 | 0.0337705771639673 | 0.7024607139713067 |
| 0.6780549316692954 | 0.0621265923022905 | 0.8507155781817984 |
| 0.9173085984965391 | 0.8232991911539685 | 0.8408210360939322 |
| 0.8007897218729696 | 0.8720243918033193 | 0.7075386409301774 |
| 0.7678855496299618 | 0.8295843691717063 | 0.4894037773298874 |
| 0.6123704426445222 | 0.8255891083300236 | 0.4968543105802322 |
| 0.5618618735970938 | 0.8770723170805611 | 0.7029104135303488 |
| 0.6751245037511507 | 0.8375032125000934 | 0.8402978627238930 |
| 0.4227047886619089 | 0.4460152389614984 | 0.6400760837083391 |
| 0.3039146441082805 | 0.4719883740506877 | 0.7874808317312167 |
| 0.2853298679010997 | 0.4323245517017587 | 0.0051174412949646 |
| 0.1269538981890491 | 0.4311919897785161 | 0.0027732360206893 |
| 0.0731209133330826 | 0.4714295270060783 | 0.7963564119875040 |
| 0.1811700147809200 | 0.4482958038638860 | 0.6473609243449174 |
| 0.4259974059288172 | 0.6727631114669210 | 0.6595103271351379 |
| 0.3048393243943707 | 0.6287943952363289 | 0.7989072486444900 |
| 0.2697694514043677 | 0.6714251741061378 | 0.0174458192170930 |
| 0.1151215541252977 | 0.6724393384741836 | 0.0106642295830577 |
| 0.0661090520373835 | 0.6285635598139792 | 0.8005115578556201 |
| 0.1808809105040557 | 0.6695779842300846 | 0.6637338541007980 |
| 0.0786397348316591 | 0.5519523283428077 | 0.1376630246002892 |
| 0.2002044332964383 | 0.5264826549960366 | 0.2821583964733066 |
| 0.2202277587002011 | 0.5667373155196210 | 0.5048159840237825 |
| 0.3795390379844754 | 0.5703383061725263 | 0.5066041887394583 |
| 0.4273187687159126 | 0.5246615450325997 | 0.2990660513802856 |
| 0.3264105307703380 | 0.5516944517844879 | 0.1419449151977892 |
| 0.0823811132573753 | 0.3264045472750553 | 0.1578086981525441 |
| 0.1976178392123519 | 0.3681954853114419 | 0.3041939903868150 |
| 0.2326934242438035 | 0.3291214547276547 | 0.5236065839143602 |
| 0.3870309059175606 | 0.3269600289230105 | 0.5094863273622227 |
| 0.4319467737033196 | 0.3688004510194915 | 0.2953766002306144 |
| 0.3174059427655815 | 0.3247007986320808 | 0.1660702334285245 |
| 0.8149188392852630 | 0.5635793572642470 | 0.3180469416194767 |
| 0.8299672536033512 | 0.3282672480633497 | 0.3543685846023606 |
| 0.7959292390048048 | 0.4733798994895232 | 0.7212941837765564 |
| 0.3565051747458632 | 0.0628773011850763 | 0.7186134977631874 |
| 0.3003520254042055 | 0.0650677785870884 | 0.8957576177866480 |
| 0.1998978278548970 | 0.0487414033668993 | 0.0255912405479354 |
| 0.1003624691666846 | 0.0656281889722018 | 0.8951198831689087 |
| 0.1021191925323667 | 0.0566345096373333 | 0.6977597184781669 |
| 0.2282153042050442 | 0.0311652344991889 | 0.7385399455378349 |
| 0.3579198850417469 | 0.8255537921603524 | 0.7487581862486148 |
| 0.3046688650007685 | 0.8442183305156361 | 0.9250230781085206 |
| 0.1898066903412404 | 0.8515588863636716 | 0.0217697566825763 |
| 0.0847981322583474 | 0.8313632696137956 | 0.9052004010362784 |
| 0.1022777744474875 | 0.8364347306467967 | 0.7091350231303239 |
| 0.2283691922831511 | 0.8547666186973319 | 0.7634547850347745 |
| 0.3211117826586072 | 0.9477051209245986 | 0.8028107551591718 |
| 0.0803102843840924 | 0.9481603988890849 | 0.8104520212628374 |
| 0.4311387160725006 | 0.1265989145946606 | 0.5855489315157780 |

**Structure files (CONTCAR) involved in this work:**

|                    |                    |                    |
|--------------------|--------------------|--------------------|
| 0.4166622867716515 | 0.9947809380727659 | 0.5702948649812697 |
| 0.3953590962238869 | 0.8628884473936386 | 0.5660539630660179 |
| 0.1952354317312209 | 0.1301833497965690 | 0.6128607897210131 |
| 0.1787991161065313 | 0.0025738373061844 | 0.5586651672132216 |
| 0.1933749639594337 | 0.8690247268649065 | 0.5714286667053452 |
| 0.9883206178446193 | 0.0443787504306306 | 0.7894555878883757 |
| 0.9819053423298719 | 0.8590495277677668 | 0.7884599904599947 |
| 0.1419405793667042 | 0.9390012676822699 | 0.2196955605996103 |
| 0.1974828065220350 | 0.9296005148301716 | 0.3969689357394319 |
| 0.2967790662613677 | 0.9481400790459998 | 0.5279650774330535 |
| 0.3970155915733794 | 0.9303830890799316 | 0.3985317219186283 |
| 0.3961791507177602 | 0.9446244945178129 | 0.2012093964026502 |
| 0.2700762024347769 | 0.9694005387936402 | 0.2425336158501543 |
| 0.1414584449658842 | 0.1690073798473930 | 0.2419142620734394 |
| 0.1942570586895101 | 0.1618705930321134 | 0.4196997739409440 |
| 0.3093489458077323 | 0.1483254150382582 | 0.5156811028701771 |
| 0.4141388048814401 | 0.1710684423893482 | 0.3995368053455424 |
| 0.3956882401002085 | 0.1556929638983518 | 0.2046838147697476 |
| 0.2703691105858622 | 0.1384201981620919 | 0.2607685567565761 |
| 0.1772779958421756 | 0.0503109789492139 | 0.3149519492775807 |
| 0.4183511426438085 | 0.0497118980288746 | 0.3209177646442722 |
| 0.0672652475462809 | 0.8707765927425746 | 0.0933561965337285 |
| 0.0803402235086836 | 0.0014756131602490 | 0.0667947325112414 |
| 0.0997034133851379 | 0.1335170678107599 | 0.0615073343013994 |
| 0.3033593038687066 | 0.8680357579048221 | 0.1207197995937009 |
| 0.3176059503897541 | 0.9941646874256095 | 0.0599825826600050 |
| 0.3033017250821153 | 0.1277161015571312 | 0.0675707974243682 |
| 0.5096097332133731 | 0.9532842411363940 | 0.2949968357073200 |
| 0.5162060513353210 | 0.1370234142379123 | 0.2837061832419502 |
| 0.6285937698080195 | 0.5667393558424327 | 0.2622394850176840 |
| 0.6712329609192438 | 0.5597180953802379 | 0.0781031061627191 |
| 0.7919560534813995 | 0.5477868743341630 | 0.9958403951773562 |
| 0.9142275352422575 | 0.5583654154780426 | 0.0756761514320683 |
| 0.8953786922109733 | 0.5613792099423026 | 0.2756955200629868 |
| 0.7573282892501639 | 0.5716041520142908 | 0.2253561064997989 |
| 0.6389873766532226 | 0.3375596809668201 | 0.2540412145848789 |
| 0.7293047227001821 | 0.3411890449129633 | 0.1148659511664276 |
| 0.8127207138978014 | 0.3531328111274752 | 0.9634076826172466 |
| 0.9133131238867348 | 0.3303666869956676 | 0.0927006769468761 |
| 0.9051515356619004 | 0.3375139348720962 | 0.2926203595332161 |
| 0.7640876868348734 | 0.3722114821570700 | 0.3009717246316219 |
| 0.6875216626589471 | 0.4556983571615172 | 0.1983551412692806 |
| 0.9149335575921108 | 0.4473920355344114 | 0.1789505799588247 |
| 0.5652605710708961 | 0.6259473469590107 | 0.4117582862569958 |
| 0.6047126444177128 | 0.5008281739919062 | 0.4331851722512589 |
| 0.5912533899661537 | 0.3674898377429897 | 0.4355519999843307 |
| 0.8214888503058329 | 0.6424639465383718 | 0.3953218695421349 |
| 0.7920228328057971 | 0.5034978430772702 | 0.4038997000891953 |
| 0.8322427835063494 | 0.3774741370187373 | 0.4722740054710748 |
| 0.0131366300085059 | 0.5384103121920064 | 0.2048826004824471 |
| 0.0185558937185272 | 0.3671088225740066 | 0.2001151814520335 |
| 0.8720634466177573 | 0.4233065668185162 | 0.7398912365828958 |
| 0.8138837330400643 | 0.4676390558331352 | 0.5895953852781760 |



**Structure files (CONTCAR) involved in this work:**

|                    |                    |                    |
|--------------------|--------------------|--------------------|
| 0.7033960346517388 | 0.4234080631413107 | 0.4996755059674827 |
| 0.5925759445860818 | 0.4322188425459698 | 0.6034676494399428 |
| 0.5995565307663762 | 0.4281828416306427 | 0.8021825860060261 |
| 0.7299054349962065 | 0.4265740013888940 | 0.7615862102654553 |
| 0.8653736813095013 | 0.6723247842402482 | 0.7334852412400390 |
| 0.7935139769098624 | 0.6301771075443814 | 0.5828257510988907 |
| 0.6924049167930696 | 0.6459315501089831 | 0.4541300259826087 |
| 0.6012823383557442 | 0.6560169250650808 | 0.5989403069559970 |
| 0.6057075106814478 | 0.6613092774193562 | 0.7964035346740057 |
| 0.7319713012223965 | 0.6746043225330752 | 0.7402022263193362 |
| 0.7978877998099694 | 0.5573159576870689 | 0.7503137846970943 |
| 0.5875442506511587 | 0.5447699962027559 | 0.7052435526384587 |
| 0.9354266859564645 | 0.3674691917303818 | 0.9010915496432739 |
| 0.8940478047105020 | 0.4944364468171269 | 0.9030757842780002 |
| 0.8865162441147425 | 0.6277028435393375 | 0.9177131503955926 |
| 0.6831986465152948 | 0.3763354239805192 | 0.9345413730565412 |
| 0.6816595295890567 | 0.5083241168737384 | 0.8988872074375308 |
| 0.7049753097961081 | 0.6375651119713548 | 0.9277153221082739 |
| 0.4858108261897104 | 0.4576814669548686 | 0.7138149047387523 |
| 0.4906867188581296 | 0.6356563352738707 | 0.7076013392094574 |
| 0.6405776149105847 | 0.9369264864752801 | 0.2929612752852871 |
| 0.6904383138819137 | 0.9415981593464231 | 0.1108167921185923 |
| 0.7989033157685596 | 0.9486612520102492 | 0.9926758266386992 |
| 0.9034311233715916 | 0.9284203326067557 | 0.1105316395973728 |
| 0.8959209915678926 | 0.9409908814154240 | 0.3086725377545792 |
| 0.7701460445649397 | 0.9569745363707343 | 0.2633681291521608 |
| 0.6414834307197925 | 0.1762414333601613 | 0.2544257778699075 |
| 0.6973468307771422 | 0.1477614073075267 | 0.0842241207926749 |
| 0.8091046186960752 | 0.1471300323882574 | 0.9811359755842788 |
| 0.9086222948517003 | 0.1701566497540351 | 0.1085227248547891 |
| 0.8981840755724704 | 0.1565937657497937 | 0.3046436411390113 |
| 0.7724297665899891 | 0.1507177270547426 | 0.2482583575691404 |
| 0.6826686441842146 | 0.0531767880410836 | 0.2222547975647610 |
| 0.9162657296005843 | 0.0485349741731439 | 0.1906060253950972 |
| 0.5666823363897384 | 0.8738200317781853 | 0.4271089706165239 |
| 0.5810397777129374 | 0.0061164473520709 | 0.4413984385167249 |
| 0.6034971533316991 | 0.1378273049575600 | 0.4359301838647498 |
| 0.8056992899425557 | 0.8597787553751463 | 0.3916489398597963 |
| 0.8113299783288407 | 0.9862066952142097 | 0.4478819996743477 |
| 0.8069216696458615 | 0.1201091989657924 | 0.4355922680974140 |
| 0.0109592449738460 | 0.9554973979350578 | 0.2208832342779036 |
| 0.0148660566043719 | 0.1362567398224543 | 0.2166144090127725 |
| 0.8583254603207314 | 0.0672468942136767 | 0.7912275172353189 |
| 0.8081581735950172 | 0.0597966626830560 | 0.6090927811856529 |
| 0.7000468641055319 | 0.0514958289851054 | 0.4907684250106653 |
| 0.5963254759992923 | 0.0768644944499798 | 0.6087871314823033 |
| 0.6028436306802917 | 0.0561062102626499 | 0.8062653516015964 |
| 0.7287922199510727 | 0.0407418334547451 | 0.7615524493020733 |
| 0.8548934843334883 | 0.8248765502918953 | 0.7635349331935075 |
| 0.8042531697545930 | 0.8566878637431089 | 0.5891169422278776 |
| 0.6896599598853862 | 0.8510506783437891 | 0.4894961356465035 |
| 0.5870507989890313 | 0.8289658882172098 | 0.6119352078293046 |
| 0.5991478075820778 | 0.8544927467912373 | 0.8052670952169770 |

**Structure files (CONTCAR) involved in this work:**

0.7258608131864959 0.8569593566069300 0.7490078925600376  
0.8215615225557299 0.9497722114161744 0.7254294382597484  
0.5804570860564218 0.9546357290814321 0.6776395720953360  
0.9348823832294447 0.1219569511554749 0.9286267418574012  
0.9171284977861962 0.9909104643726753 0.9346648243785092  
0.8959603782666855 0.8603657915623787 0.9443479241544511  
0.6922792811570033 0.1386013332783771 0.8871140667864369  
0.6870222078876533 0.0125076164785247 0.9460239844804806  
0.6927897944480473 0.8788218593457207 0.9403823790955751  
0.4877669167675194 0.0472746610422087 0.7179111101515782  
0.4817061469827285 0.8686128000656135 0.7183451130724732  
0.3556266322708484 0.4407670173216026 0.7072326058897178  
0.3065893867838682 0.4265204020794770 0.8882336383070082  
0.2058487941430758 0.4480007372169866 0.0143102713127348  
0.1056071161230042 0.4269656981801659 0.8857016163684127  
0.1049878988953322 0.4511461990983983 0.6889777671119728  
0.2294409367153003 0.4702577741190110 0.7393078586519177  
0.3629415408565886 0.6641793740496167 0.7340694934242626  
0.3017500421963420 0.6662475187639026 0.9061898134541319  
0.1922990495334569 0.6463214810796007 0.0140905196370787  
0.0895213999136023 0.6731884879241135 0.8955946951260039  
0.1047353449524206 0.6559182326964029 0.7014602701900056  
0.2330583731390536 0.6360022019575481 0.7423310045276381  
0.3220694386134381 0.5496313479783420 0.8143009476094072  
0.0851548290411537 0.5503836746491577 0.8212085733829434  
0.4325227430496697 0.3766642812663538 0.5775616262314294  
0.4174127428847073 0.5080931552278350 0.5611182410494909  
0.4081778880857419 0.6407172605303696 0.5507331442572804  
0.1966267584538837 0.3724294133548876 0.6108225168025309  
0.1876505239322315 0.4995783214497927 0.5534318797263477  
0.1879431612708722 0.6346572340474123 0.5536220698010004  
0.9940456792104179 0.4560568020424393 0.7836201655523294  
0.9862547221321595 0.6352468173022017 0.7835362107748359  
0.1425778655848166 0.5586561690774886 0.2119033171824736  
0.2026347690379753 0.5685743336060604 0.3865350442996910  
0.2997550657759562 0.5654138697243762 0.5276091258157675  
0.3927405992494455 0.5684820373152335 0.3876202847458238  
0.4001472698750597 0.5535151921739419 0.1928070431525463  
0.2720233196566351 0.5325854853075106 0.2276534167207318  
0.1413109886540985 0.3289132290265145 0.2408278198792968  
0.1947704043691605 0.3402459582120620 0.4177619464271751  
0.3099569390849157 0.3534687419758106 0.5128567078714811  
0.4125065736988826 0.3261802828810128 0.3947016582110967  
0.3947913903488014 0.3368693937883987 0.1981588978719622  
0.2707589025535435 0.3547704050481413 0.2553962339867445  
0.1826660817436732 0.4484338412010355 0.3046401981790727  
0.4070452538500323 0.4459415840002545 0.3117905374509458  
0.0696898654768828 0.6226180879414400 0.0779718533935647  
0.0862127295751377 0.4916783699618577 0.0565366847481903  
0.1091187188089023 0.3594938265595320 0.0536572358622130  
0.3111910599621858 0.6251841507213010 0.0951661301703130  
0.3257763501943963 0.4945661140559034 0.0552077399722191  
0.3022709250057174 0.3618336643922991 0.0603079174697887

**Structure files (CONTCAR) involved in this work:**

0.5073409378560908 0.5308092376740287 0.3036988126405124  
0.5117613531118897 0.3644780460731611 0.2763893595970033  
0.4420561614516330 0.7516512071617637 0.6434433806389472  
0.1951298244015542 0.7491454140130194 0.6515537095345021  
0.2735164953953411 0.7485515912045491 0.0555712290124195  
0.1086524945358918 0.7480219454047218 0.0548790074379217  
0.0628076052785236 0.2488356270579201 0.1356412961593884  
0.3028141923193589 0.2454726212339597 0.1511739159504574  
0.2281972199733517 0.2511746262142742 0.5571990372048912  
0.3919590670190806 0.2510296847170113 0.5533538170223851  
0.5607111313157895 0.2525334963778684 0.3574915270412512  
0.8112989005925521 0.2457447086301124 0.3799799251010479  
0.7258845890411736 0.2528318973637312 0.9675107280488086  
0.8938868759266618 0.2463935234270068 0.9457686983442889  
0.9345163253658237 0.7453070664682144 0.8654990528832390  
0.6807712892576958 0.7593052304997396 0.8703043520089467  
0.7745692981430279 0.7483579328793325 0.4886170014003681  
0.6064113771089659 0.7486655748215439 0.4573543595920361  
0.0426485678527696 0.6354569295271572 0.4432879147817032  
0.8883003208185871 0.4058438615664012 0.5906119299589830  
0.9627828395841230 0.3895692324657219 0.5752315925401926  
0.0579355421979285 0.6174232051079493 0.3796561177442683  
0.9210308912020851 0.6191500469053052 0.4376306058735263  
0.8905528028167923 0.6983880933908088 0.4822661634927874  
0.9116219173358689 0.6882236680276630 0.3523018198743155  
0.0836542688568910 0.6455764148536406 0.4796550869968373  
0.8916449618203182 0.6636070359410704 0.4188276884818068

**Figure 2(a) Cu-IS**

Si Al O Cu H C

1.0000000000000000

20.0219999999999985 0.0000000000000000 0.0000000000000000

0.0000000000000000 19.8990000000000009 0.0000000000000000

0.0000000000000000 0.0000000000000000 13.3829999999999991

93 3 196 3 5 1

Selective dynamics

Direct

0.4229288788235088 0.0532097363686105 0.6426107455590608 T T T  
0.3025519287439287 0.0259977817517393 0.7875306744588323 T T T  
0.2792510208010242 0.0633432206717487 0.0070097737500476 T T T  
0.1192492563408575 0.0630570884848108 0.0066400684986088 T T T  
0.0661795528116327 0.0242155802665977 0.7947249139341354 T T T  
0.1778277771927287 0.0512023620469895 0.6480799610878889 T T T  
0.4207602008703819 0.8267668160340149 0.6646427409325265 T T T  
0.3041482650693167 0.8687593567657640 0.8080231052278927 T T T  
0.2678807051331229 0.8278824568926758 0.0271592171036942 T T T  
0.1133518789281478 0.8252706203439161 0.0160731202460305 T T T  
0.0644115840323157 0.8637013660472224 0.7989773938428720 T T T  
0.1843471941128514 0.8266579779269591 0.6705276664011830 T T T  
0.0767896159729010 0.9427609014716657 0.1472930245483163 T T T  
0.1976881851314342 0.9719209000373025 0.2903770626604921 T T T  
0.2192507251123096 0.9335772119604542 0.5091485545781367 T T T  
0.3783101961575815 0.9301991688915393 0.5091881398562550 T T T  
0.4302555501335380 0.9698218697577121 0.2993732564935802 T T T

**Structure files (CONTCAR) involved in this work:**

|                    |                    |                    |   |   |   |
|--------------------|--------------------|--------------------|---|---|---|
| 0.3210588274483632 | 0.9471711160948644 | 0.1494777736426863 | T | T | T |
| 0.0797788322287983 | 0.1699635409817684 | 0.1621630269882750 | T | T | T |
| 0.1967467901026380 | 0.1286631159056456 | 0.3071016211790490 | T | T | T |
| 0.2304261269100304 | 0.1713443784997153 | 0.5242706080182651 | T | T | T |
| 0.3853249918146989 | 0.1717691033471901 | 0.5098051638433833 | T | T | T |
| 0.4344006578075581 | 0.1273280330629822 | 0.2993122079249507 | T | T | T |
| 0.3174434777422194 | 0.1681318702731249 | 0.1698145804176309 | T | T | T |
| 0.5757141957772602 | 0.5577285224839833 | 0.3497412892626215 | T | T | T |
| 0.6920748605608191 | 0.5299050732595239 | 0.2090524064767142 | T | T | T |
| 0.7147788889260256 | 0.5488770668587919 | 0.9803265253774098 | T | T | T |
| 0.8726758824590357 | 0.5628756672387450 | 0.9862627091809172 | T | T | T |
| 0.9317009972160133 | 0.5266057123481804 | 0.1942729594667980 | T | T | T |
| 0.8173012552784702 | 0.5607548894862281 | 0.3329009455489799 | T | T | T |
| 0.5808389527695736 | 0.3263276274651933 | 0.3295122326654479 | T | T | T |
| 0.7004586553851999 | 0.3722410216247736 | 0.2039971172407001 | T | T | T |
| 0.7341020008253002 | 0.3301443065109350 | 0.9862823176780569 | T | T | T |
| 0.8888508672605522 | 0.3282810653247148 | 0.9943728616737941 | T | T | T |
| 0.9375887098445639 | 0.3693829742746865 | 0.2038159548895390 | T | T | T |
| 0.8227094185400120 | 0.3310452464048816 | 0.3405714934711723 | T | T | T |
| 0.9258091415676601 | 0.4421171673842340 | 0.8548010170688485 | T | T | T |
| 0.8084603686072859 | 0.4675911270651792 | 0.7140606517492158 | T | T | T |
| 0.7808762399846417 | 0.4440712197684233 | 0.4907628443192334 | T | T | T |
| 0.6218305588512808 | 0.4333193342291840 | 0.4881802678696581 | T | T | T |
| 0.5645348739040326 | 0.4637929566698891 | 0.6998471077079451 | T | T | T |
| 0.6804033155764420 | 0.4298419668406476 | 0.8314678258710145 | T | T | T |
| 0.7984095191547771 | 0.6215386112569049 | 0.6983028814327994 | T | T | T |
| 0.6090035467110591 | 0.6706633340267952 | 0.4823037964302516 | T | T | T |
| 0.5661330263681300 | 0.6221659489298594 | 0.7008832828134883 | T | T | T |
| 0.6773821221345124 | 0.6689297558002605 | 0.8344264464596172 | T | T | T |
| 0.5761786956662319 | 0.9419142686654245 | 0.3510104868123315 | T | T | T |
| 0.6944858420234012 | 0.9739349482827119 | 0.2082410624218307 | T | T | T |
| 0.7169828852849591 | 0.9513731751109830 | 0.9843486348835989 | T | T | T |
| 0.8778573334729232 | 0.9470128751727932 | 0.9842678632759316 | T | T | T |
| 0.9337402031645926 | 0.9691457172756196 | 0.1989087496466602 | T | T | T |
| 0.8165522366789545 | 0.9309049973377586 | 0.3276300694323285 | T | T | T |
| 0.5801677115499101 | 0.1726716524759062 | 0.3251846072024722 | T | T | T |
| 0.7008942583869564 | 0.1305219947985061 | 0.1978913132782884 | T | T | T |
| 0.7358027573120325 | 0.1683746702683478 | 0.9797418339922737 | T | T | T |
| 0.8917150655588885 | 0.1750569381594997 | 0.9797548101822738 | T | T | T |
| 0.9366771537534226 | 0.1273714223055716 | 0.1983493524629710 | T | T | T |
| 0.8217532249337222 | 0.1760673466834594 | 0.3305009851753791 | T | T | T |
| 0.9218473937616343 | 0.0665198790622000 | 0.8408614629018640 | T | T | T |
| 0.8070207211326202 | 0.0342693173883120 | 0.6984410618134479 | T | T | T |
| 0.7828181666856813 | 0.0555850503057241 | 0.4728019334938010 | T | T | T |
| 0.6229867655255641 | 0.0664094363955011 | 0.4832795004545317 | T | T | T |
| 0.5677508893807204 | 0.0337565665081900 | 0.6948377352246140 | T | T | T |
| 0.6837466233932711 | 0.0681719244812164 | 0.8255539431435071 | T | T | T |
| 0.9150132118953422 | 0.8301219576139260 | 0.8297480706436212 | T | T | T |
| 0.7992825020328128 | 0.8774794960081169 | 0.6975332597692053 | T | T | T |
| 0.7686519510877122 | 0.8297369807519187 | 0.4837979847416971 | T | T | T |
| 0.6102217555844774 | 0.8251406799117200 | 0.4901904715181191 | T | T | T |
| 0.5631184618655488 | 0.8757242701450727 | 0.7033410006497330 | T | T | T |
| 0.4218972511293729 | 0.4426576873371257 | 0.6483363248132386 | T | T | T |

**Structure files (CONTCAR) involved in this work:**

|                    |                    |                    |   |   |   |
|--------------------|--------------------|--------------------|---|---|---|
| 0.3025565181635569 | 0.4723549098618716 | 0.7923149069988358 | T | T | T |
| 0.2816887735829389 | 0.4342099461018883 | 0.0119295244213013 | T | T | T |
| 0.1224307698459311 | 0.4323560912298418 | 0.0116993049217536 | T | T | T |
| 0.0711235063433240 | 0.4702793753372067 | 0.7998607130738598 | T | T | T |
| 0.1803080128797907 | 0.4467928074840937 | 0.6518499110875963 | T | T | T |
| 0.4227355000043251 | 0.6715504604444696 | 0.6657612114813710 | T | T | T |
| 0.3061375047726861 | 0.6286998176655072 | 0.8090244629193213 | T | T | T |
| 0.2689119596689449 | 0.6713745430331154 | 0.0271200462511628 | T | T | T |
| 0.1150983924474462 | 0.6721812099079539 | 0.0120846402975351 | T | T | T |
| 0.0673417565365330 | 0.6294889103695563 | 0.7977856558248891 | T | T | T |
| 0.1864088657772180 | 0.6687411462188825 | 0.6685924996194700 | T | T | T |
| 0.0763352658461605 | 0.5552959850610278 | 0.1440356843074639 | T | T | T |
| 0.1964781866226783 | 0.5256920718033958 | 0.2875811140653740 | T | T | T |
| 0.2209890947274335 | 0.5624149417255639 | 0.5086545506517983 | T | T | T |
| 0.3803208093862339 | 0.5650708237809380 | 0.5114239141408247 | T | T | T |
| 0.4307603784747741 | 0.5257365854572532 | 0.3001609109888221 | T | T | T |
| 0.3222465796711314 | 0.5523443688408614 | 0.1496170156835591 | T | T | T |
| 0.0810395557237817 | 0.3245038384629443 | 0.1657314861690243 | T | T | T |
| 0.1970048058888335 | 0.3681631988697656 | 0.3078378929707450 | T | T | T |
| 0.2330060293247956 | 0.3277872287760836 | 0.5262686467821053 | T | T | T |
| 0.3880030354163993 | 0.3243755023508129 | 0.5137745662573762 | T | T | T |
| 0.4363332040679542 | 0.3689364154286955 | 0.3014322971077719 | T | T | T |
| 0.3188538391239701 | 0.3269812097678475 | 0.1727352738743813 | T | T | T |
| 0.7651907848738120 | 0.6682929636577412 | 0.4837397999386530 | T | T | T |
| 0.9163958001755074 | 0.6743320454991428 | 0.8209333561906085 | T | T | T |
| 0.6762539633603395 | 0.8293960070012811 | 0.8384915568004049 | T | T | T |
| 0.3571216876337017 | 0.0586732271784659 | 0.7127801181941311 | T | T | T |
| 0.3007428478368070 | 0.0694356021844333 | 0.8904331381334954 | T | T | T |
| 0.1991169192540614 | 0.0520857899939937 | 0.0177754717387265 | T | T | T |
| 0.0974799509821555 | 0.0637527901369438 | 0.8901992193103229 | T | T | T |
| 0.1027214572598038 | 0.0498133203731384 | 0.6935824182604092 | T | T | T |
| 0.2292306682894610 | 0.0283933830351848 | 0.7357827603825913 | T | T | T |
| 0.3589568285996631 | 0.8281755184680430 | 0.7433323585164607 | T | T | T |
| 0.3045744756182961 | 0.8386067328925801 | 0.9203979568799208 | T | T | T |
| 0.1902170554638304 | 0.8519220728889113 | 0.0189591297416205 | T | T | T |
| 0.0869372353855667 | 0.8276609840416838 | 0.9020014325313416 | T | T | T |
| 0.1067195447581395 | 0.8348036412391835 | 0.7046501551644366 | T | T | T |
| 0.2304156720226843 | 0.8588714369813256 | 0.7585543281820049 | T | T | T |
| 0.3219521870264402 | 0.9483630294764227 | 0.8113391535152211 | T | T | T |
| 0.0760330002518316 | 0.9439270816866758 | 0.8104257995375198 | T | T | T |
| 0.4301965920230756 | 0.1217860064958366 | 0.5774563109252832 | T | T | T |
| 0.4189365289563433 | 0.9897536303544440 | 0.5660238426348398 | T | T | T |
| 0.3966056888031400 | 0.8577933970400186 | 0.5577726082396255 | T | T | T |
| 0.1937620426532773 | 0.1268215474121326 | 0.6095272919752519 | T | T | T |
| 0.1811344090045207 | 0.9986901425564180 | 0.5552289614021002 | T | T | T |
| 0.1962090272010574 | 0.8648541234489975 | 0.5647914525889158 | T | T | T |
| 0.9873138422537624 | 0.0403978135887895 | 0.7818423721534349 | T | T | T |
| 0.9868490747672094 | 0.8448045031996250 | 0.7779336546856407 | T | T | T |
| 0.1432577519788445 | 0.9390199273197712 | 0.2156953562599042 | T | T | T |
| 0.1993842658749763 | 0.9272986896127164 | 0.3919270766365581 | T | T | T |
| 0.2989955851863102 | 0.9450095005596535 | 0.5228322885535426 | T | T | T |
| 0.3981154565751944 | 0.9276881205128187 | 0.3918160387194384 | T | T | T |
| 0.3961100284940686 | 0.9479963500411897 | 0.1943444903212790 | T | T | T |

**Structure files (CONTCAR) involved in this work:**

|                    |                    |                    |   |   |   |
|--------------------|--------------------|--------------------|---|---|---|
| 0.2705212218891133 | 0.9711192097270449 | 0.2376283519802576 | T | T | T |
| 0.1433331718979977 | 0.1666465537269134 | 0.2364038154830316 | T | T | T |
| 0.1932162921796764 | 0.1623674440299080 | 0.4171594948917273 | T | T | T |
| 0.3077399266757538 | 0.1469934355363688 | 0.5134529892169915 | T | T | T |
| 0.4112671070491316 | 0.1718481837034702 | 0.3949726096972034 | T | T | T |
| 0.3950104223672158 | 0.1538229300534204 | 0.2001278206824815 | T | T | T |
| 0.2709959812168604 | 0.1379580163354297 | 0.2594744709858688 | T | T | T |
| 0.1780832579842284 | 0.0493853456925935 | 0.3154212443286315 | T | T | T |
| 0.4170263798212867 | 0.0491507407989455 | 0.3214011955540690 | T | T | T |
| 0.0676747108163608 | 0.8715494665792212 | 0.0889249338213376 | T | T | T |
| 0.0811795693950479 | 0.0022462043110045 | 0.0641534649068527 | T | T | T |
| 0.0971400435541779 | 0.1342760916262268 | 0.0559807305915722 | T | T | T |
| 0.3044535577358027 | 0.8712862544151894 | 0.1134214856283043 | T | T | T |
| 0.3166552979483145 | 0.9984796842610096 | 0.0551834583392182 | T | T | T |
| 0.3004312419400588 | 0.1322123097689067 | 0.0638319986744714 | T | T | T |
| 0.5089862000167170 | 0.9541460661766266 | 0.2861031747271499 | T | T | T |
| 0.5141659275760804 | 0.1355137454385256 | 0.2808539466601636 | T | T | T |
| 0.6356781956928839 | 0.5710542255388084 | 0.2694897496989955 | T | T | T |
| 0.6824107308650473 | 0.5440101720832702 | 0.0905143074621325 | T | T | T |
| 0.7949493270790313 | 0.5397401852391785 | 0.9830633729763686 | T | T | T |
| 0.9011486318411837 | 0.5666227191698060 | 0.0994206824949601 | T | T | T |
| 0.8941184091344963 | 0.5507481084583919 | 0.2962098086919513 | T | T | T |
| 0.7664634482444144 | 0.5563124452002053 | 0.2393370948762252 | T | T | T |
| 0.6416686017639476 | 0.3259500490620312 | 0.2493865635329195 | T | T | T |
| 0.6994630584876569 | 0.3634057103946029 | 0.0840091588061559 | T | T | T |
| 0.8118928365872806 | 0.3539140712767285 | 0.9858584859828469 | T | T | T |
| 0.9120598323658071 | 0.3241941829393011 | 0.1104878854445459 | T | T | T |
| 0.8992332871958990 | 0.3464237790710122 | 0.3050729075610668 | T | T | T |
| 0.7730493709226464 | 0.3506251808828314 | 0.2480998776655448 | T | T | T |
| 0.6856091490355571 | 0.4502317791062398 | 0.2333765596902083 | T | T | T |
| 0.9198978652036323 | 0.4471927960733562 | 0.1773563488182532 | T | T | T |
| 0.5584737789754717 | 0.6244909843438883 | 0.4143147916643466 | T | T | T |
| 0.5960217027244823 | 0.4968547644835403 | 0.4240431846273780 | T | T | T |
| 0.6056767874345006 | 0.3634546117195796 | 0.4306913674983034 | T | T | T |
| 0.8176007294845824 | 0.6380574100387821 | 0.3796454161208032 | T | T | T |
| 0.7976047884615343 | 0.5069142769836452 | 0.4171274226309786 | T | T | T |
| 0.8063607465360163 | 0.3749191376040555 | 0.4392867728937545 | T | T | T |
| 0.0095048624776844 | 0.5459505453062855 | 0.2124769181877924 | T | T | T |
| 0.0176052954746496 | 0.3615059408835933 | 0.2191827736196912 | T | T | T |
| 0.8633666171785067 | 0.4268224589722350 | 0.7806105854533287 | T | T | T |
| 0.8202742766644785 | 0.4534066751457791 | 0.5957472215704301 | T | T | T |
| 0.7012242036567935 | 0.4404927148653379 | 0.5088877423845475 | T | T | T |
| 0.5822155264169360 | 0.4300972103335085 | 0.5930355995049468 | T | T | T |
| 0.6054915747272528 | 0.4248922512630423 | 0.7871861069152926 | T | T | T |
| 0.7337905221347256 | 0.4410122769469417 | 0.7418308501081247 | T | T | T |
| 0.8539501698843431 | 0.6739793861065104 | 0.7347057030942655 | T | T | T |
| 0.7924262069518064 | 0.6176404121097155 | 0.5797833919285309 | T | T | T |
| 0.6838940828556299 | 0.6492535640989044 | 0.4550061138181667 | T | T | T |
| 0.5926002637365998 | 0.6589983559650212 | 0.6009464105313854 | T | T | T |
| 0.6008083020747624 | 0.6550213998413116 | 0.8005416684737721 | T | T | T |
| 0.7258008183118543 | 0.6414407348542788 | 0.7481834376138941 | T | T | T |
| 0.8167274330679217 | 0.5463496363685727 | 0.7425669117514114 | T | T | T |
| 0.5850142037589511 | 0.5427089091711794 | 0.6985214648371758 | T | T | T |

**Structure files (CONTCAR) involved in this work:**

|                    |                    |                    |   |   |   |
|--------------------|--------------------|--------------------|---|---|---|
| 0.9359332135749827 | 0.3794294998373240 | 0.9315515181938651 | T | T | T |
| 0.9156537696629968 | 0.5097999277426798 | 0.9215183610992917 | T | T | T |
| 0.8868724698164936 | 0.6367770233881883 | 0.9354340257199771 | T | T | T |
| 0.6964473030876320 | 0.3600623335530691 | 0.8889653701936714 | T | T | T |
| 0.6821664934508453 | 0.4942631377647848 | 0.9071516846123151 | T | T | T |
| 0.6936906908009888 | 0.6259678803202722 | 0.9421377256485634 | T | T | T |
| 0.4853950373763765 | 0.4536018195945111 | 0.7221369250446088 | T | T | T |
| 0.4858347076595949 | 0.6308050462812949 | 0.7123997440237299 | T | T | T |
| 0.6381041645586506 | 0.9354382138698800 | 0.2729713569346899 | T | T | T |
| 0.6794370779752197 | 0.9668399528613151 | 0.0892833626363808 | T | T | T |
| 0.7975401025884790 | 0.9497981461877891 | 0.0036237970547270 | T | T | T |
| 0.9150459445318035 | 0.9384022291774449 | 0.0902291557800032 | T | T | T |
| 0.8929698264041441 | 0.9309963929962437 | 0.2865600938325319 | T | T | T |
| 0.7669372868986740 | 0.9401411952927498 | 0.2310329656444068 | T | T | T |
| 0.6368495552100326 | 0.1722871211746009 | 0.2380591447273499 | T | T | T |
| 0.7022767819173333 | 0.1325797716348601 | 0.0768192785045733 | T | T | T |
| 0.8146188193125892 | 0.1487591170052681 | 0.9740648310582908 | T | T | T |
| 0.9192342601103072 | 0.1621412301257055 | 0.0918022856117262 | T | T | T |
| 0.8973612268143996 | 0.1656879063731430 | 0.2882015602838201 | T | T | T |
| 0.7699966660243953 | 0.1638226478491523 | 0.2381443610580820 | T | T | T |
| 0.6950186161073741 | 0.0534444657112707 | 0.2378930871534799 | T | T | T |
| 0.9149375723434459 | 0.0487921110300147 | 0.1990737934700803 | T | T | T |
| 0.5674090625224698 | 0.8741272044049340 | 0.4164454744166205 | T | T | T |
| 0.5864753484415810 | 0.0051246322765272 | 0.4257140793252724 | T | T | T |
| 0.6079974462413278 | 0.1364514128411065 | 0.4252912575869111 | T | T | T |
| 0.8025570954231288 | 0.8600892313048897 | 0.3820738431654925 | T | T | T |
| 0.8061777362497048 | 0.9941306688034759 | 0.4022884569147355 | T | T | T |
| 0.8057743804693320 | 0.1264926856888118 | 0.4231534506839092 | T | T | T |
| 0.0128443410188378 | 0.9565416137543116 | 0.2190330982533899 | T | T | T |
| 0.0167262916000245 | 0.1336397016781240 | 0.2170114397860398 | T | T | T |
| 0.8617657019443493 | 0.0772146492525574 | 0.7615553084399215 | T | T | T |
| 0.8189186683691535 | 0.0486980359203871 | 0.5807391618321462 | T | T | T |
| 0.7026547596008509 | 0.0533220906923167 | 0.4877993805837377 | T | T | T |
| 0.5922799349314254 | 0.0727895474847141 | 0.5945831900010696 | T | T | T |
| 0.6065176899293647 | 0.0665556151702989 | 0.7901863557972333 | T | T | T |
| 0.7323274992677101 | 0.0599000072845905 | 0.7289657175174292 | T | T | T |
| 0.8602243549475959 | 0.8312593805774871 | 0.7417521915864527 | T | T | T |
| 0.7999637332082356 | 0.8727476359806332 | 0.5765210079399288 | T | T | T |
| 0.6885166339578248 | 0.8445225112101091 | 0.4781232924428772 | T | T | T |
| 0.5872011141058230 | 0.8334237498195554 | 0.6054162197715012 | T | T | T |
| 0.5951346070510772 | 0.8466013058624379 | 0.8041453495079114 | T | T | T |
| 0.7298979007912136 | 0.8544923017862202 | 0.7449581797325430 | T | T | T |
| 0.8169846252706285 | 0.9556615913205524 | 0.7272665400469229 | T | T | T |
| 0.5839937715545224 | 0.9543614106858814 | 0.6849975582584361 | T | T | T |
| 0.9375901100405847 | 0.1372115736271706 | 0.8969155011048799 | T | T | T |
| 0.9010922506116417 | 0.0153002180700947 | 0.9300398399372587 | T | T | T |
| 0.8986081389392501 | 0.8840435312670857 | 0.9156626136610468 | T | T | T |
| 0.6980589728315320 | 0.1392884014306755 | 0.8815876239453135 | T | T | T |
| 0.6967547235618158 | 0.0053284142310115 | 0.9011156966888469 | T | T | T |
| 0.6984973331236682 | 0.8738111258030902 | 0.9520891695841065 | T | T | T |
| 0.4883604746007588 | 0.0460350667172519 | 0.7130371155923920 | T | T | T |
| 0.4815561958029454 | 0.8707152939351223 | 0.7101603977683071 | T | T | T |
| 0.3548469322434811 | 0.4380644262278783 | 0.7156105172520952 | T | T | T |

**Structure files (CONTCAR) involved in this work:**

|                    |                    |                    |   |   |   |
|--------------------|--------------------|--------------------|---|---|---|
| 0.3002715893068268 | 0.4279818541277883 | 0.8942628733522765 | T | T | T |
| 0.2017553835896383 | 0.4452165049391642 | 0.0276049527528935 | T | T | T |
| 0.1037063614561825 | 0.4302014128502103 | 0.8942093421995491 | T | T | T |
| 0.1050400877843673 | 0.4450136537096112 | 0.6963433630871801 | T | T | T |
| 0.2292049973509889 | 0.4728818771848385 | 0.7407906645678863 | T | T | T |
| 0.3621876783660699 | 0.6684016938717838 | 0.7457846377433152 | T | T | T |
| 0.3045707899798231 | 0.6614945333058392 | 0.9195394331610676 | T | T | T |
| 0.1917467258518981 | 0.6454353765906848 | 0.0210416340560836 | T | T | T |
| 0.0921967607454188 | 0.6708163970838275 | 0.8964166600746433 | T | T | T |
| 0.1092334507200862 | 0.6562417407465463 | 0.7008085957476223 | T | T | T |
| 0.2336973046505726 | 0.6370064963660755 | 0.7555320158227966 | T | T | T |
| 0.3246279013838964 | 0.5492341159654162 | 0.8168573939823339 | T | T | T |
| 0.0829688175134924 | 0.5500944679596773 | 0.8170047219858864 | T | T | T |
| 0.4307670463546351 | 0.3724462458838275 | 0.5877282990331740 | T | T | T |
| 0.4194553245327126 | 0.5046479870434351 | 0.5687787600263170 | T | T | T |
| 0.3992506146461730 | 0.6370665128037507 | 0.5610114927904570 | T | T | T |
| 0.2002268441865755 | 0.3718213233010081 | 0.6154184646659445 | T | T | T |
| 0.1824207336621215 | 0.4986371665322479 | 0.5579899173679236 | T | T | T |
| 0.1996945721029753 | 0.6326027316454624 | 0.5614575219880029 | T | T | T |
| 0.9925054356330697 | 0.4521782682717477 | 0.7886301421383584 | T | T | T |
| 0.9899176722807186 | 0.6430975458155206 | 0.7775638600127602 | T | T | T |
| 0.1400625625792029 | 0.5608647384777016 | 0.2178817022671738 | T | T | T |
| 0.1992241882438407 | 0.5668794318866971 | 0.3920710372687352 | T | T | T |
| 0.3007329251235859 | 0.5505759670051574 | 0.5212934977571884 | T | T | T |
| 0.4017604168436993 | 0.5675667381841383 | 0.3949108451353054 | T | T | T |
| 0.3962991112403398 | 0.5520884760389950 | 0.1978654573200982 | T | T | T |
| 0.2689267784143939 | 0.5292821730036086 | 0.2344414960130736 | T | T | T |
| 0.1433576343874303 | 0.3258941377751398 | 0.2427274607860557 | T | T | T |
| 0.1938822501730290 | 0.3410904609057172 | 0.4217689006909497 | T | T | T |
| 0.3106697746958609 | 0.3498924541463811 | 0.5117743771056255 | T | T | T |
| 0.4182921201514891 | 0.3269389118880730 | 0.4016323025760987 | T | T | T |
| 0.3964020731409559 | 0.3376386096751919 | 0.2061171689142635 | T | T | T |
| 0.2713701639606526 | 0.3570773575794720 | 0.2613895497874563 | T | T | T |
| 0.1769393251590475 | 0.4473867040588445 | 0.3057505161449955 | T | T | T |
| 0.4143326355394455 | 0.4466107142360735 | 0.3179926138509099 | T | T | T |
| 0.0676173824078896 | 0.6243341260723065 | 0.0805955007101666 | T | T | T |
| 0.0816501124306348 | 0.4925402959424034 | 0.0671037016255058 | T | T | T |
| 0.1006828554669724 | 0.3612999965541220 | 0.0613935562825497 | T | T | T |
| 0.3072702596793745 | 0.6280740663676446 | 0.1117419106092600 | T | T | T |
| 0.3200644832353182 | 0.4995886619916616 | 0.0568679529961666 | T | T | T |
| 0.3047486914077819 | 0.3656285882714924 | 0.0678315244819716 | T | T | T |
| 0.5101981014410207 | 0.5366664997061961 | 0.2859872727525757 | T | T | T |
| 0.5162707639530399 | 0.3638554137442466 | 0.2805258965898718 | T | T | T |
| 0.4426517227763688 | 0.7491944189972423 | 0.6452816604901819 | T | T | T |
| 0.2022251948732020 | 0.7480201078869034 | 0.6544467379824304 | T | T | T |
| 0.2720275243881546 | 0.7495879820260568 | 0.0597732878643012 | T | T | T |
| 0.1084782247851110 | 0.7481575007376297 | 0.0552250555530877 | T | T | T |
| 0.0616258259921971 | 0.2477424520389382 | 0.1389282641585405 | T | T | T |
| 0.3037526137884976 | 0.2478723381003260 | 0.1559613553625142 | T | T | T |
| 0.2265801286453494 | 0.2494917416179005 | 0.5581839275984274 | T | T | T |
| 0.3920331991939218 | 0.2475502569830563 | 0.5540772833938143 | T | T | T |
| 0.5617461442384913 | 0.2493221672970150 | 0.3555647728811549 | T | T | T |
| 0.8140911980965361 | 0.2527123938269120 | 0.3704555450756619 | T | T | T |



**Structure files (CONTCAR) involved in this work:**

|                    |                    |                    |   |   |   |
|--------------------|--------------------|--------------------|---|---|---|
| 0.7269455818285445 | 0.2492388593971800 | 0.9867088965223447 | T | T | T |
| 0.8955275339634835 | 0.2535650354178224 | 0.9490257374134567 | T | T | T |
| 0.9163576076530303 | 0.7549651633847655 | 0.8836506304896792 | T | T | T |
| 0.6896108723344511 | 0.7445523076400916 | 0.8726191350333098 | T | T | T |
| 0.7856108036953893 | 0.7516309913191448 | 0.4940933501217150 | T | T | T |
| 0.5941972367981231 | 0.7488204986999365 | 0.4555758062032462 | T | T | T |
| 0.8001526652781282 | 0.6740767294655496 | 0.0736299257676592 | T | T | T |
| 0.7009789424826204 | 0.7699520527171165 | 0.1169002261857240 | T | T | T |
| 0.8401560684924226 | 0.7967485369770548 | 0.0583177021487806 | T | T | T |
| 0.9331517406862120 | 0.6808259527494359 | 0.3884032396572673 | T | T | T |
| 0.7143404680924204 | 0.6981956122788431 | 0.0434728432483530 | T | T | T |
| 0.7564245053670108 | 0.8235945240785468 | 0.0469486580624665 | T | T | T |
| 0.8593469319011853 | 0.7196501792175611 | 0.9966193296048936 | T | T | T |
| 0.8678529001071394 | 0.6605231203419318 | 0.3804684008204241 | T | T | T |
| 0.9454751704187898 | 0.7406864220156391 | 0.5131593916651536 | T | T | T |
| 0.0051215785430551 | 0.6734407243077014 | 0.5027238194219582 | T | T | T |
| 0.9205563917113790 | 0.6560898422370492 | 0.5406673315958166 | T | T | T |
| 0.9584904486868728 | 0.6441132734280492 | 0.3581610757318841 | T | T | T |
| 0.9525893158107325 | 0.6877632479014761 | 0.4933963374208288 | T | T | T |

**Figure 2(a) Cu-TS**

Si Al O Cu H C

1.0000000000000000

20.0219999999999985 0.0000000000000000 0.0000000000000000

0.0000000000000000 19.8990000000000009 0.0000000000000000

0.0000000000000000 0.0000000000000000 13.3829999999999991

93 3 196 3 5 1

Selective dynamics

Direct

|                    |                    |                    |   |   |   |
|--------------------|--------------------|--------------------|---|---|---|
| 0.4226141214419629 | 0.0533042214391157 | 0.6422758727454486 | T | T | T |
| 0.3020639201253080 | 0.0260638639511597 | 0.7868771107130187 | T | T | T |
| 0.2792313971459404 | 0.0631424860667862 | 0.0068076682040806 | T | T | T |
| 0.1192943423698227 | 0.0627816490713295 | 0.0067266540720432 | T | T | T |
| 0.0660516265418535 | 0.0239425848973468 | 0.7942622379333900 | T | T | T |
| 0.1773319721359744 | 0.0514692866779397 | 0.6473147171439416 | T | T | T |
| 0.4209246713028167 | 0.8265805791110721 | 0.6635703149995100 | T | T | T |
| 0.3042029560456854 | 0.8686395108798067 | 0.8073044329877912 | T | T | T |
| 0.2680822612978968 | 0.8277026692659222 | 0.0263455977588350 | T | T | T |
| 0.1135924808152468 | 0.8250449018938718 | 0.0149257269162604 | T | T | T |
| 0.0641978849927578 | 0.8631802410361736 | 0.7977224036618936 | T | T | T |
| 0.1844201989447083 | 0.8263790083219312 | 0.6696723561378545 | T | T | T |
| 0.0767585882694404 | 0.9422632403943342 | 0.1469838609255751 | T | T | T |
| 0.1977264929442358 | 0.9717875787496318 | 0.2896997433405410 | T | T | T |
| 0.2190706486454305 | 0.9338007663139040 | 0.5088364076763647 | T | T | T |
| 0.3779510279195068 | 0.9302167751137519 | 0.5091585450692884 | T | T | T |
| 0.4298808652529821 | 0.9696748481843790 | 0.2993390492159429 | T | T | T |
| 0.3211820807917404 | 0.9469617517471076 | 0.1487728482954169 | T | T | T |
| 0.0797207273539071 | 0.1698323868517458 | 0.1612399025551745 | T | T | T |
| 0.1968971470152874 | 0.1285591536748301 | 0.3059916439119165 | T | T | T |
| 0.2301180660749741 | 0.1714623664189724 | 0.5232083267252813 | T | T | T |
| 0.3849720528579450 | 0.1717736191293059 | 0.5091663954553914 | T | T | T |
| 0.4345281935203168 | 0.1270990234204794 | 0.2991143198313967 | T | T | T |
| 0.3178958420541992 | 0.1679862037089031 | 0.1692610072569628 | T | T | T |
| 0.5767149225282148 | 0.5569947451303813 | 0.3506545844211831 | T | T | T |

**Structure files (CONTCAR) involved in this work:**

|                    |                    |                    |   |   |   |
|--------------------|--------------------|--------------------|---|---|---|
| 0.6937248133945819 | 0.5283257870532080 | 0.2111088987325685 | T | T | T |
| 0.7139310260453845 | 0.5485832628383515 | 0.9830742814890294 | T | T | T |
| 0.8720016746258570 | 0.5629307993091284 | 0.9869573886257907 | T | T | T |
| 0.9313505326776829 | 0.5282773174335841 | 0.1957972727464355 | T | T | T |
| 0.8176446188676180 | 0.5630634619372937 | 0.3337599931991627 | T | T | T |
| 0.5809968706334551 | 0.3260754402967473 | 0.3295791515837790 | T | T | T |
| 0.7006071188806502 | 0.3714168800825431 | 0.2056096210787709 | T | T | T |
| 0.7341661997027674 | 0.3305567872962556 | 0.9870175840378469 | T | T | T |
| 0.8891081563797717 | 0.3286524406712000 | 0.9949311466716092 | T | T | T |
| 0.9374130337569478 | 0.3709071179671672 | 0.2042066167743145 | T | T | T |
| 0.8234019816765752 | 0.3309368259498087 | 0.3422285054243629 | T | T | T |
| 0.9254841858888979 | 0.4424247468972524 | 0.8550133305319010 | T | T | T |
| 0.8082957381037253 | 0.4681071490265843 | 0.7139110056585063 | T | T | T |
| 0.7816628416050995 | 0.4441226163930760 | 0.4899006850056040 | T | T | T |
| 0.6224610532211761 | 0.4325310484370749 | 0.4886006946531585 | T | T | T |
| 0.5646855577178627 | 0.4632052270262313 | 0.6997833732028069 | T | T | T |
| 0.6802418036968801 | 0.4305146814428949 | 0.8324838655444363 | T | T | T |
| 0.7971736261515153 | 0.6219149808479778 | 0.6974172008674259 | T | T | T |
| 0.6043777945364430 | 0.6736584812377786 | 0.4839564933159602 | T | T | T |
| 0.5654026217479169 | 0.6216108164209339 | 0.7022857533926514 | T | T | T |
| 0.6764799696782895 | 0.6687672075157899 | 0.8385408265763004 | T | T | T |
| 0.5762198895532030 | 0.9434551636874405 | 0.3517245698751383 | T | T | T |
| 0.6948172529175498 | 0.9749139336773049 | 0.2091637513814230 | T | T | T |
| 0.7166991501474048 | 0.9518654520536713 | 0.9850918938900196 | T | T | T |
| 0.8776036729020879 | 0.9462625145821632 | 0.9838026923074029 | T | T | T |
| 0.9334727381880448 | 0.9678256525431647 | 0.1982973317482463 | T | T | T |
| 0.8164216066405919 | 0.9306700610150224 | 0.3284702896261908 | T | T | T |
| 0.5801761313933501 | 0.1728524189924390 | 0.3256598002700980 | T | T | T |
| 0.7015022181263483 | 0.1312188034981922 | 0.1988655792725548 | T | T | T |
| 0.7356489603901025 | 0.1688926264184965 | 0.9803997580362132 | T | T | T |
| 0.8916157818220349 | 0.1752398152099014 | 0.9802592257328183 | T | T | T |
| 0.9368731316592632 | 0.1262190364170618 | 0.1981644816975259 | T | T | T |
| 0.8226180896240323 | 0.1758283025510744 | 0.3312281439449604 | T | T | T |
| 0.9217956865233445 | 0.0662544593191988 | 0.8419380215856682 | T | T | T |
| 0.8063490333216781 | 0.0343832820033944 | 0.6992908344548771 | T | T | T |
| 0.7826745756010832 | 0.0553744306399777 | 0.4734970632422449 | T | T | T |
| 0.6230064269330894 | 0.0675266575407791 | 0.4839042811101628 | T | T | T |
| 0.5675492083331040 | 0.0347648885139255 | 0.6953466965869578 | T | T | T |
| 0.6832961719419023 | 0.0686475502046187 | 0.8263943200277142 | T | T | T |
| 0.9143297935613031 | 0.8298461885280666 | 0.8274181754330211 | T | T | T |
| 0.7974353886354055 | 0.8773438863593961 | 0.6987628327655804 | T | T | T |
| 0.7686397231145111 | 0.8272508965526941 | 0.4839332273917971 | T | T | T |
| 0.6078957045244466 | 0.8230689430870498 | 0.4907808206419338 | T | T | T |
| 0.5636737303747713 | 0.8767644581454539 | 0.7040090910651792 | T | T | T |
| 0.4218501791408186 | 0.4425345588388390 | 0.6478605022946359 | T | T | T |
| 0.3022639461107428 | 0.4723269078559114 | 0.7916844032739099 | T | T | T |
| 0.2818114990781664 | 0.4338099962397681 | 0.0114869604600726 | T | T | T |
| 0.1224901361038975 | 0.4319847978756967 | 0.0107572480284359 | T | T | T |
| 0.0710969415159008 | 0.4705037740002925 | 0.7991066986035760 | T | T | T |
| 0.1800783541334192 | 0.4467637795852213 | 0.6509042837209723 | T | T | T |
| 0.4226839038793252 | 0.6712489687381522 | 0.6656594839107677 | T | T | T |
| 0.3054693437688301 | 0.6287275496037563 | 0.8079465958674149 | T | T | T |
| 0.2692615922382651 | 0.6712665923427849 | 0.0262728004205152 | T | T | T |

**Structure files (CONTCAR) involved in this work:**

|                    |                    |                    |   |   |   |
|--------------------|--------------------|--------------------|---|---|---|
| 0.1155855497202977 | 0.6719200843007523 | 0.0105395760401594 | T | T | T |
| 0.0674497835912133 | 0.6299274137951582 | 0.7965225039382979 | T | T | T |
| 0.1862258710100709 | 0.6685309146287876 | 0.6672069153046915 | T | T | T |
| 0.0762832671251292 | 0.5552341697865795 | 0.1424887404054969 | T | T | T |
| 0.1966049020879884 | 0.5260553170964419 | 0.2858963470526291 | T | T | T |
| 0.2212524985463435 | 0.5623016391961461 | 0.5071347167945148 | T | T | T |
| 0.3809229592562412 | 0.5650614768642053 | 0.5102453865059876 | T | T | T |
| 0.4320102732216401 | 0.5260105902089343 | 0.2990916538883379 | T | T | T |
| 0.3229082153142895 | 0.5523119072208644 | 0.1489324561408286 | T | T | T |
| 0.0805062186841478 | 0.3246607049010714 | 0.1649836619004433 | T | T | T |
| 0.1970435845163688 | 0.3683824125098432 | 0.3062558078281859 | T | T | T |
| 0.2327037318935627 | 0.3279980233066109 | 0.5250270820284986 | T | T | T |
| 0.3877411253091937 | 0.3244585996920709 | 0.5132313904825314 | T | T | T |
| 0.4367008394576813 | 0.3692143882172567 | 0.3011213049503866 | T | T | T |
| 0.3193577262801823 | 0.3269058042131176 | 0.1720235913281115 | T | T | T |
| 0.7648956392152894 | 0.6672504414284807 | 0.4783921923442205 | T | T | T |
| 0.9151497426859656 | 0.6735173311854242 | 0.8191180029955859 | T | T | T |
| 0.6745773771569818 | 0.8292917172913601 | 0.8421953508026720 | T | T | T |
| 0.3567856173276471 | 0.0587301294235124 | 0.7124126415768499 | T | T | T |
| 0.3000273152544047 | 0.0692765965565239 | 0.8899477910280503 | T | T | T |
| 0.1991324850196837 | 0.0517040566122439 | 0.0186944165578357 | T | T | T |
| 0.0979395918355586 | 0.0624644829799033 | 0.8901143915116346 | T | T | T |
| 0.1023167840593896 | 0.0501731873888799 | 0.6932491134442696 | T | T | T |
| 0.2288659209389238 | 0.0286139501723827 | 0.7347751240718390 | T | T | T |
| 0.3594066590155729 | 0.8285254711562945 | 0.7427828357778147 | T | T | T |
| 0.3048362172689026 | 0.8384955713960199 | 0.9196530359994849 | T | T | T |
| 0.1904066538966521 | 0.8517817538922516 | 0.0176265318876494 | T | T | T |
| 0.0867863440615053 | 0.8276856079675484 | 0.9010253049039799 | T | T | T |
| 0.1065531993686407 | 0.8338016174583764 | 0.7035512398455481 | T | T | T |
| 0.2304227472943511 | 0.8581459051570836 | 0.7579830374366089 | T | T | T |
| 0.3212706161853572 | 0.9483663154438969 | 0.8105210365651689 | T | T | T |
| 0.0756563055729585 | 0.9434241129453325 | 0.8080508266868591 | T | T | T |
| 0.4298164039779032 | 0.1216977465203911 | 0.5767679992484313 | T | T | T |
| 0.4188455727887432 | 0.9895248222097938 | 0.5661593674940896 | T | T | T |
| 0.3961124727380924 | 0.8575067286169855 | 0.5569424030757376 | T | T | T |
| 0.1932200825629674 | 0.1269699642259396 | 0.6083686345524133 | T | T | T |
| 0.1804120541760769 | 0.9986570640295060 | 0.5547012399777739 | T | T | T |
| 0.1959874699829038 | 0.8649116734013295 | 0.5641885462260030 | T | T | T |
| 0.9871703755770043 | 0.0402767797328305 | 0.7824413132603057 | T | T | T |
| 0.9867134991014018 | 0.8437222096789431 | 0.7764248214016052 | T | T | T |
| 0.1430580980590183 | 0.9384953829763656 | 0.2157130681148588 | T | T | T |
| 0.1996705979310275 | 0.9273355606921422 | 0.3914679127704200 | T | T | T |
| 0.2987040160437944 | 0.9453726697115270 | 0.5234361615735142 | T | T | T |
| 0.3972866283910700 | 0.9277690190096644 | 0.3916292405690491 | T | T | T |
| 0.3961262840403668 | 0.9477147178548049 | 0.1940829837491785 | T | T | T |
| 0.2703986758145752 | 0.9708651986967777 | 0.2366041872753877 | T | T | T |
| 0.1435377911727570 | 0.1663556538218021 | 0.2350217754038271 | T | T | T |
| 0.1931141629543170 | 0.1622967965226782 | 0.4159858142997134 | T | T | T |
| 0.3074054573626785 | 0.1469175428004796 | 0.5129589946088882 | T | T | T |
| 0.4109282911039014 | 0.1717557111852474 | 0.3943553240775113 | T | T | T |
| 0.3954850567359148 | 0.1535560996421993 | 0.1995559847080129 | T | T | T |
| 0.2712626424158087 | 0.1377629365411508 | 0.2587385381888663 | T | T | T |
| 0.1781510212432265 | 0.0492556784008603 | 0.3144833116122843 | T | T | T |

**Structure files (CONTCAR) involved in this work:**

|                    |                    |                    |   |   |   |
|--------------------|--------------------|--------------------|---|---|---|
| 0.4166620945995343 | 0.0489878865327846 | 0.3210409920920551 | T | T | T |
| 0.0679669105402893 | 0.8712734942866075 | 0.0879396863453361 | T | T | T |
| 0.0808969862945710 | 0.0023456654247643 | 0.0648338237861310 | T | T | T |
| 0.0970821998998955 | 0.1343656427525404 | 0.0547338676955856 | T | T | T |
| 0.3045136214608797 | 0.8711145453175548 | 0.1126905680119964 | T | T | T |
| 0.3170020832999407 | 0.9982909324616341 | 0.0544686713789182 | T | T | T |
| 0.3007620528002300 | 0.1320071668316933 | 0.0633046373069741 | T | T | T |
| 0.5086476603030236 | 0.9536594321250775 | 0.2870570753557666 | T | T | T |
| 0.5144958380752990 | 0.1346143891841306 | 0.2819988478443375 | T | T | T |
| 0.6384880811354052 | 0.5704322429368254 | 0.2737126817371732 | T | T | T |
| 0.6812116980951430 | 0.5423274723352186 | 0.0926920939357544 | T | T | T |
| 0.7942144321857774 | 0.5398854749259123 | 0.9845696388112953 | T | T | T |
| 0.9017930658730878 | 0.5678217515657378 | 0.0989834232110912 | T | T | T |
| 0.8949917158651409 | 0.5522212382764911 | 0.2973552444078316 | T | T | T |
| 0.7693319810240207 | 0.5514621241214989 | 0.2361660458040930 | T | T | T |
| 0.6416413934985072 | 0.3243759943199767 | 0.2492736004972351 | T | T | T |
| 0.7002267194658173 | 0.3634570274740981 | 0.0853688479130661 | T | T | T |
| 0.8120685726166124 | 0.3537070704911015 | 0.9854786924764007 | T | T | T |
| 0.9119180313337987 | 0.3251727074118291 | 0.1111458237295858 | T | T | T |
| 0.8994502609118993 | 0.3475107720038251 | 0.3056351025672910 | T | T | T |
| 0.7729022527615790 | 0.3492106002945368 | 0.2500806378608971 | T | T | T |
| 0.6842341231211297 | 0.4487772637688107 | 0.2358121546186003 | T | T | T |
| 0.9200994670651932 | 0.4485045864313789 | 0.1772763984778485 | T | T | T |
| 0.5584813534464643 | 0.6229990814508316 | 0.4161711155827443 | T | T | T |
| 0.5949355332768324 | 0.4957049587537299 | 0.4252606341458748 | T | T | T |
| 0.6062279613686780 | 0.3626381877611429 | 0.4309321674142799 | T | T | T |
| 0.8111471020426727 | 0.6371533632850441 | 0.3775846828326383 | T | T | T |
| 0.7995304988892957 | 0.5047435831913479 | 0.4146595456232844 | T | T | T |
| 0.8063147419914127 | 0.3732034663985331 | 0.4419464334893502 | T | T | T |
| 0.0100650440447857 | 0.5459314852716665 | 0.2110414501622853 | T | T | T |
| 0.0175343118579343 | 0.3618790028357967 | 0.2189385747764735 | T | T | T |
| 0.8631726981062224 | 0.4272781541838260 | 0.7806809033775979 | T | T | T |
| 0.8200899238618359 | 0.4533752836552001 | 0.5960585307751430 | T | T | T |
| 0.7016978297726544 | 0.4406737866579008 | 0.5082939433465175 | T | T | T |
| 0.5831326986152943 | 0.4287498929929288 | 0.5938712943133393 | T | T | T |
| 0.6052918735516962 | 0.4251289750081529 | 0.7882247951157338 | T | T | T |
| 0.7335959508891177 | 0.4420973361975508 | 0.7429805546769672 | T | T | T |
| 0.8555759118701655 | 0.6737389256399782 | 0.7278164617820188 | T | T | T |
| 0.7851726865950498 | 0.6179720075727330 | 0.5803842589417177 | T | T | T |
| 0.6808800462766921 | 0.6644833649720667 | 0.4559913237340101 | T | T | T |
| 0.5909099485308780 | 0.6593082449984367 | 0.6028025706210507 | T | T | T |
| 0.6006994403840780 | 0.6534304040010268 | 0.8021361969350191 | T | T | T |
| 0.7276760637506073 | 0.6430890406801463 | 0.7551369182396462 | T | T | T |
| 0.8170061172107727 | 0.5470433279846597 | 0.7416580221449272 | T | T | T |
| 0.5844375733963817 | 0.5423129642233928 | 0.6976925668433468 | T | T | T |
| 0.9360220638330072 | 0.3795923799563121 | 0.9313955332508610 | T | T | T |
| 0.9149743508060665 | 0.5100246227827929 | 0.9216799393762765 | T | T | T |
| 0.8848271140688858 | 0.6365574777087085 | 0.9332217833192111 | T | T | T |
| 0.6963734341778494 | 0.3607537293865848 | 0.8900458979106645 | T | T | T |
| 0.6814710971539779 | 0.4949464320122815 | 0.9080636764504486 | T | T | T |
| 0.6921904225858060 | 0.6260552057799421 | 0.9466142368963446 | T | T | T |
| 0.4853856909538189 | 0.4532578271650086 | 0.7214853509645754 | T | T | T |
| 0.4850243399522083 | 0.6305526747182241 | 0.7147178843329314 | T | T | T |

**Structure files (CONTCAR) involved in this work:**

|                    |                    |                    |   |   |   |
|--------------------|--------------------|--------------------|---|---|---|
| 0.6379980186467079 | 0.9368609223427108 | 0.2735561875301010 | T | T | T |
| 0.6799749245429996 | 0.9686248804756482 | 0.0902301198808526 | T | T | T |
| 0.7973783552312413 | 0.9498451351542075 | 0.0030372620665670 | T | T | T |
| 0.9145001797179497 | 0.9364481531439297 | 0.0899949355597145 | T | T | T |
| 0.8927520839820383 | 0.9299687092921415 | 0.2867982770349539 | T | T | T |
| 0.7665949672007215 | 0.9395601364575322 | 0.2323998411708648 | T | T | T |
| 0.6368352319463964 | 0.1721355459225274 | 0.2385372581499982 | T | T | T |
| 0.7027675297449566 | 0.1328339185283400 | 0.0778020941576664 | T | T | T |
| 0.8144412793448216 | 0.1493140436827912 | 0.9737171296817650 | T | T | T |
| 0.9186165106084541 | 0.1614432350069769 | 0.0923807169944965 | T | T | T |
| 0.8980098809312856 | 0.1636417828177130 | 0.2891249729623362 | T | T | T |
| 0.7703947872060685 | 0.1649053782041218 | 0.2390245470397641 | T | T | T |
| 0.6966717454922005 | 0.0541513327176610 | 0.2396443165264825 | T | T | T |
| 0.9151438445022450 | 0.0474870648396871 | 0.1980924647747120 | T | T | T |
| 0.5696836325916339 | 0.8766652678252626 | 0.4193284359395903 | T | T | T |
| 0.5854704473459952 | 0.0073456604937039 | 0.4252473484933388 | T | T | T |
| 0.6089076309732970 | 0.1377909762979672 | 0.4262622533575285 | T | T | T |
| 0.8028916518302025 | 0.8596882554696295 | 0.3838736117303252 | T | T | T |
| 0.8064000798700096 | 0.9933624417821053 | 0.4039110486886445 | T | T | T |
| 0.8057120175194338 | 0.1258900719433731 | 0.4232803458409378 | T | T | T |
| 0.0124897764991424 | 0.9548477676552605 | 0.2187093880605108 | T | T | T |
| 0.0170335844131262 | 0.1325350748143890 | 0.2157983190408318 | T | T | T |
| 0.8615235620240784 | 0.0763968311982295 | 0.7627568635513124 | T | T | T |
| 0.8186352062896369 | 0.0486091505875458 | 0.5816032272313915 | T | T | T |
| 0.7024694050607405 | 0.0526774631956164 | 0.4881230064507079 | T | T | T |
| 0.5924869254891378 | 0.0738231123179848 | 0.5953216238039432 | T | T | T |
| 0.6060410160150863 | 0.0673657090620993 | 0.7910406222653327 | T | T | T |
| 0.7318808515828682 | 0.0606169171760483 | 0.7296337788932694 | T | T | T |
| 0.8608446068220175 | 0.8317979330627312 | 0.7370938020895250 | T | T | T |
| 0.7940045590061706 | 0.8729905341897107 | 0.5774295623339725 | T | T | T |
| 0.6881234281886164 | 0.8299526011551579 | 0.4731458587361596 | T | T | T |
| 0.5914941980757544 | 0.8354000703607800 | 0.6075696940660813 | T | T | T |
| 0.5941707315174211 | 0.8482182381548286 | 0.8061900450574421 | T | T | T |
| 0.7301172545299979 | 0.8528450871235723 | 0.7501716884910713 | T | T | T |
| 0.8152666010901458 | 0.9554749769495586 | 0.7274879157532562 | T | T | T |
| 0.5840686137333659 | 0.9554693217584632 | 0.6857691441209646 | T | T | T |
| 0.9374021009099833 | 0.1370784586297657 | 0.8975036586809910 | T | T | T |
| 0.9017448951464665 | 0.0149076654716015 | 0.9313600897933737 | T | T | T |
| 0.8977706562431602 | 0.8840508844049670 | 0.9129499244535079 | T | T | T |
| 0.6975820048896992 | 0.1395561364880546 | 0.8826872593980831 | T | T | T |
| 0.6964074828855563 | 0.0053671357865321 | 0.9011766925193246 | T | T | T |
| 0.6970451338550409 | 0.8743294830337657 | 0.9549203367836138 | T | T | T |
| 0.4880457696498338 | 0.0465854532018695 | 0.7128285539224936 | T | T | T |
| 0.4821376710640337 | 0.8707195521657062 | 0.7073383974367344 | T | T | T |
| 0.3547498684729784 | 0.4382879687259179 | 0.7151255278926086 | T | T | T |
| 0.2999998257288579 | 0.4280275692483894 | 0.8936195817848486 | T | T | T |
| 0.2018845440386360 | 0.4440093787487386 | 0.0278014500469254 | T | T | T |
| 0.1045680123275435 | 0.4305508891872852 | 0.8928454240261455 | T | T | T |
| 0.1046924227527184 | 0.4454921340092485 | 0.6951094897067204 | T | T | T |
| 0.2289635337814562 | 0.4726996766673840 | 0.7399601591716009 | T | T | T |
| 0.3608707429043375 | 0.6685086734014702 | 0.7436478399492618 | T | T | T |
| 0.3043066226270350 | 0.6619960721935656 | 0.9181031069017157 | T | T | T |
| 0.1921596994271575 | 0.6452041005039120 | 0.0204973221023565 | T | T | T |

**Structure files (CONTCAR) involved in this work:**

|                    |                    |                    |   |   |   |
|--------------------|--------------------|--------------------|---|---|---|
| 0.0937707881122127 | 0.6712597404195273 | 0.8941792670640327 | T | T | T |
| 0.1082598899890873 | 0.6567730178832947 | 0.6977566906840206 | T | T | T |
| 0.2325970577723726 | 0.6367243833502771 | 0.7549953051297041 | T | T | T |
| 0.3239817984778602 | 0.5493566410856823 | 0.8161909374351453 | T | T | T |
| 0.0829019173567384 | 0.5505724167540671 | 0.8151808805611598 | T | T | T |
| 0.4304832331941950 | 0.3721932961968421 | 0.5875817101685391 | T | T | T |
| 0.4192413353930593 | 0.5043080969650764 | 0.5679503875834970 | T | T | T |
| 0.4001799130946469 | 0.6367807993891955 | 0.5604602677394601 | T | T | T |
| 0.1996271716122204 | 0.3717480188759173 | 0.6142913430623553 | T | T | T |
| 0.1828729759652775 | 0.4986127973809468 | 0.5569855052523677 | T | T | T |
| 0.1993775905706916 | 0.6324465085379157 | 0.5600651121800919 | T | T | T |
| 0.9924177974731266 | 0.4526834721657613 | 0.7891401956768378 | T | T | T |
| 0.9901010547133743 | 0.6445485371988589 | 0.7768524667693470 | T | T | T |
| 0.1405735277163589 | 0.5613396488626551 | 0.2156742672299544 | T | T | T |
| 0.1987962098415603 | 0.5669624490626670 | 0.3908694356247310 | T | T | T |
| 0.3010680795747709 | 0.5512756644800813 | 0.5193611875353511 | T | T | T |
| 0.4027597930629825 | 0.5677177195285037 | 0.3939419179419281 | T | T | T |
| 0.3970726495291643 | 0.5520493812370073 | 0.1968633899602308 | T | T | T |
| 0.2695190901704602 | 0.5300778385553543 | 0.2341700275910598 | T | T | T |
| 0.1434155353339079 | 0.3261332643473642 | 0.2410901057933704 | T | T | T |
| 0.1938739262486698 | 0.3415470496044722 | 0.4203737366245405 | T | T | T |
| 0.3104189896111053 | 0.3500615129358344 | 0.5113085798485467 | T | T | T |
| 0.4180463018279250 | 0.3272833632743410 | 0.4011747358292809 | T | T | T |
| 0.3967691429281861 | 0.3377506954756399 | 0.2058611416968315 | T | T | T |
| 0.2714634714229131 | 0.3570634063444527 | 0.2600976027411855 | T | T | T |
| 0.1772666548488663 | 0.4476763326829505 | 0.3038134099460987 | T | T | T |
| 0.4150385758951752 | 0.4470037146884172 | 0.3172424180231063 | T | T | T |
| 0.0677129799081957 | 0.6240570559438212 | 0.0780214323320147 | T | T | T |
| 0.0821901076610639 | 0.4926155642117823 | 0.0653709759948385 | T | T | T |
| 0.0998100934049031 | 0.3610318645803695 | 0.0600011241277938 | T | T | T |
| 0.3081647489119698 | 0.6279768012141679 | 0.1102446698274590 | T | T | T |
| 0.3200204482642557 | 0.4992822842467227 | 0.0565461548947007 | T | T | T |
| 0.3056097465889309 | 0.3652470755350369 | 0.0667490281981403 | T | T | T |
| 0.5114940046898082 | 0.5370484580715781 | 0.2848330608418027 | T | T | T |
| 0.5166330736555675 | 0.3640993587294829 | 0.2807634856094836 | T | T | T |
| 0.4427339712667068 | 0.7489344899575412 | 0.6452268247504079 | T | T | T |
| 0.2021694399342703 | 0.7477621147207200 | 0.6527547521179221 | T | T | T |
| 0.2721629028678876 | 0.7494793341579922 | 0.0591933308686154 | T | T | T |
| 0.1087248885779119 | 0.7479173602466126 | 0.0538802396918576 | T | T | T |
| 0.0612273820627323 | 0.2476145652791331 | 0.1389706290135065 | T | T | T |
| 0.3043244934781880 | 0.2477156074166186 | 0.1554985682763519 | T | T | T |
| 0.2262029916387857 | 0.2496365319100842 | 0.5567661370986676 | T | T | T |
| 0.3916168775751298 | 0.2475372997166960 | 0.5533099376498468 | T | T | T |
| 0.5606180954263722 | 0.2492506924102935 | 0.3552155300278492 | T | T | T |
| 0.8166245864459299 | 0.2522034667776258 | 0.3718091870350287 | T | T | T |
| 0.7265210540206869 | 0.2496045146434710 | 0.9871201640125304 | T | T | T |
| 0.8963984408300414 | 0.2537151554467217 | 0.9502460075679772 | T | T | T |
| 0.9144801404560858 | 0.7546617250923331 | 0.8808616236421118 | T | T | T |
| 0.6863883306780261 | 0.7446502939233084 | 0.8772516488451593 | T | T | T |
| 0.7957846095764071 | 0.7507221360347218 | 0.4962348959142965 | T | T | T |
| 0.5795149409518860 | 0.7498727731963829 | 0.4593552373856978 | T | T | T |
| 0.8001069425489746 | 0.6744202784268689 | 0.0739613669850444 | T | T | T |
| 0.7011191249679171 | 0.7696422480295088 | 0.1209687106102113 | T | T | T |

**Structure files (CONTCAR) involved in this work:**

|                    |                    |                    |   |   |   |
|--------------------|--------------------|--------------------|---|---|---|
| 0.8396559418527503 | 0.7971193671347996 | 0.0559081692048736 | T | T | T |
| 0.9948806072393273 | 0.7174079522734774 | 0.4681871766646084 | T | T | T |
| 0.7136802673376131 | 0.6977602637015978 | 0.0478541546122620 | T | T | T |
| 0.7552878276662026 | 0.8234273031531975 | 0.0488661943566856 | T | T | T |
| 0.8581162151433507 | 0.7196932099639295 | 0.9948619785937451 | T | T | T |
| 0.9973076358569395 | 0.6804686572919346 | 0.4198735797160351 | T | T | T |
| 0.9057723700916932 | 0.7832306540896233 | 0.4425509461889162 | T | T | T |
| 0.9032075455300815 | 0.7381479657913330 | 0.5660774759420663 | T | T | T |
| 0.8870791379871098 | 0.6913384681938262 | 0.4457708219877717 | T | T | T |
| 0.0145089967824859 | 0.7004920640691893 | 0.5304907969744376 | T | T | T |
| 0.902791843332150  | 0.7366576350282198 | 0.4847779886387900 | T | T | T |

**Figure 2(a) Cu-FS**

Si Al O Cu H C

1.0000000000000000

20.0219993591000005 0.0000000000000000 0.0000000000000000

0.0000000000000000 19.8990001678000006 0.0000000000000000

0.0000000000000000 0.0000000000000000 13.3830003737999998

93 3 196 3 5 1

Selective dynamics

Direct

|                    |                    |                    |   |   |   |
|--------------------|--------------------|--------------------|---|---|---|
| 0.4216897864324184 | 0.0534280772471200 | 0.6417257689534627 | T | T | T |
| 0.3015028314220362 | 0.0259161491555747 | 0.7865072333772530 | T | T | T |
| 0.2790791045464139 | 0.0627287321451911 | 0.0068746245484123 | T | T | T |
| 0.1191696371825006 | 0.0625080367757418 | 0.0066131882845609 | T | T | T |
| 0.0658500780112039 | 0.0240340127606700 | 0.7943136737138349 | T | T | T |
| 0.1769279234708413 | 0.0512482396439195 | 0.6470129283425817 | T | T | T |
| 0.4210208143470217 | 0.8263212401879311 | 0.6637735548578143 | T | T | T |
| 0.3040543426999966 | 0.8684262180897646 | 0.8068566087779281 | T | T | T |
| 0.2682425127333518 | 0.8274670224827051 | 0.0258106519971954 | T | T | T |
| 0.1139646087909564 | 0.8246799132894513 | 0.0146898997502246 | T | T | T |
| 0.0638045992241808 | 0.8633327345276429 | 0.7984452338000850 | T | T | T |
| 0.1836810474081627 | 0.8260178134621107 | 0.6698351117279741 | T | T | T |
| 0.0767356983436937 | 0.9417817897562277 | 0.1465327163599908 | T | T | T |
| 0.1976389059938206 | 0.9712628010931130 | 0.2897661775016771 | T | T | T |
| 0.2187097956981397 | 0.9333180835247310 | 0.5089067490125467 | T | T | T |
| 0.3776103962167411 | 0.9297233337571743 | 0.5094096675061676 | T | T | T |
| 0.4298514013821083 | 0.9686332205932124 | 0.2995393058552417 | T | T | T |
| 0.3211465383900386 | 0.9464048392091403 | 0.1487900353560746 | T | T | T |
| 0.0793088198129466 | 0.1694485038097555 | 0.1610136026634751 | T | T | T |
| 0.1966640151876068 | 0.1282504146704795 | 0.3058753555141741 | T | T | T |
| 0.2293912380295061 | 0.1714472659795791 | 0.5229829160902255 | T | T | T |
| 0.3842904902271583 | 0.1717818372279426 | 0.5081689266007493 | T | T | T |
| 0.4343476609161144 | 0.1261467642638494 | 0.2988909261527549 | T | T | T |
| 0.3179620481027527 | 0.1675535674873003 | 0.1690582285818769 | T | T | T |
| 0.5774776465990751 | 0.5567126961824700 | 0.3511518463489691 | T | T | T |
| 0.6928935062393762 | 0.5266999567312680 | 0.2099673794935267 | T | T | T |
| 0.7132184250882486 | 0.5486567169908466 | 0.9830506347823602 | T | T | T |
| 0.8711892109234571 | 0.5636186503848404 | 0.9870084088871387 | T | T | T |
| 0.9316764905766022 | 0.5280089924321490 | 0.1938302361807758 | T | T | T |
| 0.8170421854812898 | 0.5607964449833234 | 0.3304816865310147 | T | T | T |
| 0.5804887880567601 | 0.3254856319664776 | 0.3302233099116940 | T | T | T |
| 0.6991141629843290 | 0.3704950170305991 | 0.2049962804567969 | T | T | T |
| 0.7340240884093174 | 0.3308995302766561 | 0.9868530433050826 | T | T | T |

**Structure files (CONTCAR) involved in this work:**

|                    |                    |                    |   |   |   |
|--------------------|--------------------|--------------------|---|---|---|
| 0.8885639360260118 | 0.3289472613274580 | 0.9948355491924270 | T | T | T |
| 0.9384527599570858 | 0.3714041798923221 | 0.2019967896850047 | T | T | T |
| 0.8235022670019543 | 0.3324176550845176 | 0.3397065983041051 | T | T | T |
| 0.9248052612625461 | 0.4432016163891248 | 0.8548064901025909 | T | T | T |
| 0.8075650219911089 | 0.4690280507390232 | 0.7127056377453229 | T | T | T |
| 0.7811189495389447 | 0.4438265923618335 | 0.4894245796872085 | T | T | T |
| 0.6219853640188170 | 0.4318399566044282 | 0.4890431953081902 | T | T | T |
| 0.5642715835015809 | 0.4624241735754482 | 0.7002397238574861 | T | T | T |
| 0.6800112013431091 | 0.4309538563048437 | 0.8318630510093082 | T | T | T |
| 0.7964346604096385 | 0.6239800850705630 | 0.6966805942885389 | T | T | T |
| 0.6041450989432441 | 0.6747470699316755 | 0.4855636732387078 | T | T | T |
| 0.5660546521235289 | 0.6207462079919654 | 0.7029867900491232 | T | T | T |
| 0.6759429884004493 | 0.6693849820420656 | 0.8396318864603297 | T | T | T |
| 0.5765792894558928 | 0.9436881681683942 | 0.3513234624203951 | T | T | T |
| 0.6935999913633252 | 0.9774782315469985 | 0.2071780370460824 | T | T | T |
| 0.7162631923109561 | 0.9535715765781657 | 0.9842267134929005 | T | T | T |
| 0.8765266244385874 | 0.9467905308533245 | 0.9833912635715975 | T | T | T |
| 0.9332714373393201 | 0.9669651609599083 | 0.1962694416562611 | T | T | T |
| 0.8155181423852890 | 0.9350065951190280 | 0.3253336010810987 | T | T | T |
| 0.5795840285907649 | 0.1732494904177962 | 0.3254446397401651 | T | T | T |
| 0.6998514078160744 | 0.1333295574642833 | 0.1974986260057262 | T | T | T |
| 0.7353051687840548 | 0.1691981775150068 | 0.9793060750469090 | T | T | T |
| 0.8906857740281697 | 0.1755231721432735 | 0.9800094790350856 | T | T | T |
| 0.9362393740508672 | 0.1255130897668972 | 0.1967687711970845 | T | T | T |
| 0.8215080028658274 | 0.1765991669730496 | 0.3294167767554602 | T | T | T |
| 0.9219165884177721 | 0.0663451969982332 | 0.8422332821819218 | T | T | T |
| 0.8057546525367577 | 0.0351515156085232 | 0.6980826612264647 | T | T | T |
| 0.7817031880558316 | 0.0576539047537496 | 0.4733280675142290 | T | T | T |
| 0.6224901856829779 | 0.0678598338153082 | 0.4832621472219857 | T | T | T |
| 0.5665710917330834 | 0.0361323575292064 | 0.6947602998621687 | T | T | T |
| 0.6825354105614824 | 0.0694293641179936 | 0.8249026998501670 | T | T | T |
| 0.9130496678508919 | 0.8302614069908506 | 0.8265965679714846 | T | T | T |
| 0.7968419930758897 | 0.8770464639524971 | 0.6978093194674218 | T | T | T |
| 0.7665601993143212 | 0.8302007994848473 | 0.4791978887945940 | T | T | T |
| 0.6063795481260212 | 0.8219449415304666 | 0.4925340353926951 | T | T | T |
| 0.5636042870589055 | 0.8781448417644039 | 0.7050120250113873 | T | T | T |
| 0.4214399181840412 | 0.4424596044245193 | 0.6473313966843025 | T | T | T |
| 0.3021689382743007 | 0.4720260120220065 | 0.7915613087291714 | T | T | T |
| 0.2817478546343844 | 0.4337408698824794 | 0.0113665620938930 | T | T | T |
| 0.1224168270230526 | 0.4317359510186320 | 0.0103316860951465 | T | T | T |
| 0.0706973396662736 | 0.4705412252732475 | 0.7996606001599234 | T | T | T |
| 0.1797357149453641 | 0.4468945481947933 | 0.6511791901591065 | T | T | T |
| 0.4230056959416009 | 0.6710419337487126 | 0.6653110852201397 | T | T | T |
| 0.3057870970862875 | 0.6283992413018252 | 0.8075404757545980 | T | T | T |
| 0.2696875556869150 | 0.6709166314312281 | 0.0258880036410260 | T | T | T |
| 0.1162909111427808 | 0.6718272089095317 | 0.0105865403292034 | T | T | T |
| 0.0674962976991495 | 0.6294047497809385 | 0.7977633219736368 | T | T | T |
| 0.1857332986006970 | 0.6680060306782336 | 0.6672992488701296 | T | T | T |
| 0.0765583058297630 | 0.5550775673632622 | 0.1419391037932844 | T | T | T |
| 0.1968220533650053 | 0.5258658352685024 | 0.2857416756244030 | T | T | T |
| 0.2212461886405717 | 0.5623155247416423 | 0.5069079461020680 | T | T | T |
| 0.3809923063939046 | 0.5652112199777117 | 0.5097774900196085 | T | T | T |
| 0.4327875503088724 | 0.5266660981404401 | 0.2987098943341157 | T | T | T |



**Structure files (CONTCAR) involved in this work:**

|                    |                    |                    |   |   |   |
|--------------------|--------------------|--------------------|---|---|---|
| 0.3232310711095899 | 0.5522748308927007 | 0.1489534839164710 | T | T | T |
| 0.0810873136895907 | 0.3242687653924909 | 0.1649594748955622 | T | T | T |
| 0.1973471880969379 | 0.3680298324397879 | 0.3062522451807657 | T | T | T |
| 0.2320520255324802 | 0.3280194193171757 | 0.5254068732636145 | T | T | T |
| 0.3872354184464392 | 0.3246340575286547 | 0.5124018093215750 | T | T | T |
| 0.4368314357732899 | 0.3696497187795327 | 0.3004763590738406 | T | T | T |
| 0.3195496522204990 | 0.3268143570605399 | 0.1719135755838215 | T | T | T |
| 0.7647910929067844 | 0.6655531844175093 | 0.4720992547975030 | T | T | T |
| 0.9148889000564409 | 0.6739170631509298 | 0.8185187690868835 | T | T | T |
| 0.6743569518417826 | 0.8299704850318502 | 0.8428139800517805 | T | T | T |
| 0.3558607353684615 | 0.0590148818876073 | 0.7117295071093038 | T | T | T |
| 0.2998800115219895 | 0.0687242163165341 | 0.8899797255195608 | T | T | T |
| 0.1989987931942847 | 0.0513019334141823 | 0.0188163227142695 | T | T | T |
| 0.0979427422472653 | 0.0626717591725179 | 0.8899203203178571 | T | T | T |
| 0.1019306632923579 | 0.0496355950605762 | 0.6928264403278984 | T | T | T |
| 0.2281988003623589 | 0.0286455137553497 | 0.7349784188315694 | T | T | T |
| 0.3596615084072424 | 0.8282905159418235 | 0.7429823421872429 | T | T | T |
| 0.3052038527638583 | 0.8386833785532455 | 0.9194017858312824 | T | T | T |
| 0.1907016744294702 | 0.8517946739599190 | 0.0169157101033485 | T | T | T |
| 0.0868201911229797 | 0.8271484064365826 | 0.9009829996922339 | T | T | T |
| 0.1060741550009191 | 0.8346868188009978 | 0.7039840425095985 | T | T | T |
| 0.2303891891668084 | 0.8575894303529435 | 0.7577234974314724 | T | T | T |
| 0.3210745016106299 | 0.9482150921510089 | 0.8092946910234369 | T | T | T |
| 0.0749154655028039 | 0.9436335694587957 | 0.8094797012555078 | T | T | T |
| 0.4290472137026879 | 0.1215143809975435 | 0.5756389644059613 | T | T | T |
| 0.4184206512861846 | 0.9891717592903259 | 0.5663890316174025 | T | T | T |
| 0.3962051708569646 | 0.8570884669015552 | 0.5570892563377686 | T | T | T |
| 0.1926699271226059 | 0.1268028086257078 | 0.6081599791922750 | T | T | T |
| 0.1803879098205821 | 0.9984884745554384 | 0.5544313339927900 | T | T | T |
| 0.1956353274339181 | 0.8646205255561299 | 0.5644077689788454 | T | T | T |
| 0.9871628061503582 | 0.0412678632588644 | 0.7817382449902499 | T | T | T |
| 0.9859728320495007 | 0.8447627984372256 | 0.7784887649436055 | T | T | T |
| 0.1428197370001227 | 0.9383302936522526 | 0.2157427562587954 | T | T | T |
| 0.1994845925554610 | 0.9268226517825263 | 0.3914907990955268 | T | T | T |
| 0.2984294959497420 | 0.9448297453065789 | 0.5234380024932550 | T | T | T |
| 0.3972793421681302 | 0.9269788846921484 | 0.3919879536669229 | T | T | T |
| 0.3961157116141418 | 0.9470153274303383 | 0.1942236464874851 | T | T | T |
| 0.2703644785364538 | 0.9700774490524774 | 0.2367213026873111 | T | T | T |
| 0.1429718467501975 | 0.1655644055382678 | 0.2349886890390438 | T | T | T |
| 0.1924778570136284 | 0.1621569536676030 | 0.4157249861545999 | T | T | T |
| 0.3067441542991153 | 0.1470642686498448 | 0.5124933919287503 | T | T | T |
| 0.4101449863117694 | 0.1712351894635305 | 0.3932769225059019 | T | T | T |
| 0.3954618367781285 | 0.1519595924771887 | 0.1989131755533831 | T | T | T |
| 0.2710222002202742 | 0.1379030137761920 | 0.2586387878456393 | T | T | T |
| 0.1784826254920814 | 0.0488383972643555 | 0.3145500599978879 | T | T | T |
| 0.4171938304009229 | 0.0479669390297757 | 0.3214525577262854 | T | T | T |
| 0.0682091549164591 | 0.8710202218813246 | 0.0872078170918440 | T | T | T |
| 0.0807618592276245 | 0.0021024604515064 | 0.0646621178402193 | T | T | T |
| 0.0968137741611458 | 0.1340695797054169 | 0.0545443085859554 | T | T | T |
| 0.3047157054680891 | 0.8706195311296125 | 0.1124425507893963 | T | T | T |
| 0.3170347913005508 | 0.9980498685022002 | 0.0548467643114615 | T | T | T |
| 0.3004308795454366 | 0.1317755393824958 | 0.0631059997097548 | T | T | T |
| 0.5085947721874455 | 0.9518115354022647 | 0.2872491587958179 | T | T | T |

**Structure files (CONTCAR) involved in this work:**

|                    |                    |                    |   |   |   |
|--------------------|--------------------|--------------------|---|---|---|
| 0.5144341987335891 | 0.1337999125835715 | 0.2825886160588822 | T | T | T |
| 0.6402143397395649 | 0.5701343340839315 | 0.2757746266020090 | T | T | T |
| 0.6794203982539536 | 0.5421007920562428 | 0.0921338440875590 | T | T | T |
| 0.7934752144186644 | 0.5398332315895249 | 0.9856183497926329 | T | T | T |
| 0.9015948599454346 | 0.5691888292745084 | 0.0986838216034241 | T | T | T |
| 0.8942418482194990 | 0.5489420021527258 | 0.2958386663632797 | T | T | T |
| 0.7697001413992552 | 0.5465876778433584 | 0.2324942216655452 | T | T | T |
| 0.6416821695100907 | 0.3224885002024460 | 0.2508058463975664 | T | T | T |
| 0.6980225076705481 | 0.3621142346781507 | 0.0847932942783838 | T | T | T |
| 0.8116354704001828 | 0.3549304745908911 | 0.9885197563524263 | T | T | T |
| 0.9130862076309282 | 0.3243778394501989 | 0.1102479385662299 | T | T | T |
| 0.8991646767384563 | 0.3506242515573284 | 0.3035288197319756 | T | T | T |
| 0.7723739182612919 | 0.3505364782227166 | 0.2482746268293201 | T | T | T |
| 0.6806484934325154 | 0.4475498357652966 | 0.2343201292277556 | T | T | T |
| 0.9224469053871744 | 0.4485358378186000 | 0.1707819432839919 | T | T | T |
| 0.5605581868400342 | 0.6225864477990807 | 0.4176186234848515 | T | T | T |
| 0.5941634950031133 | 0.4949128226530629 | 0.4255349979291969 | T | T | T |
| 0.6058993393827641 | 0.3619352420298765 | 0.4315143344861880 | T | T | T |
| 0.8075719226432575 | 0.6356154685615578 | 0.3700534509462033 | T | T | T |
| 0.7979825301953196 | 0.5051786326824770 | 0.4149943025730301 | T | T | T |
| 0.8058382060502772 | 0.3733532498078678 | 0.4404495927123451 | T | T | T |
| 0.0099108883876136 | 0.5471010161958091 | 0.2100833921269808 | T | T | T |
| 0.0182124205633734 | 0.3615661627047608 | 0.2191486183042030 | T | T | T |
| 0.8622022881816109 | 0.4288717539604583 | 0.7806032750558805 | T | T | T |
| 0.8197080736777848 | 0.4531028336353908 | 0.5953042091992061 | T | T | T |
| 0.7012091846039612 | 0.4402033543441011 | 0.5085156863393177 | T | T | T |
| 0.5828070995484238 | 0.4280497811604101 | 0.5943370080124589 | T | T | T |
| 0.6048591969890462 | 0.4242968459675058 | 0.7886671747478066 | T | T | T |
| 0.7327708638477557 | 0.4432597847152777 | 0.7418357104457132 | T | T | T |
| 0.8548096628975115 | 0.6751223021415095 | 0.7280134975103734 | T | T | T |
| 0.7840211140794564 | 0.6228716029547650 | 0.5793163833435234 | T | T | T |
| 0.6809193601327393 | 0.6725703491137992 | 0.4550286014218931 | T | T | T |
| 0.5938193628188921 | 0.6579391162526255 | 0.6041615451973116 | T | T | T |
| 0.6003219568378404 | 0.6526648319334615 | 0.8035550881730104 | T | T | T |
| 0.7271219570711559 | 0.6445892312149519 | 0.7554732227219446 | T | T | T |
| 0.8157192703041170 | 0.5483539082722863 | 0.7378393193263389 | T | T | T |
| 0.5846955281254387 | 0.5414093851230541 | 0.6986411728708819 | T | T | T |
| 0.9348986153123725 | 0.3798117093959846 | 0.9303715805923110 | T | T | T |
| 0.9141181552529068 | 0.5106021768908288 | 0.9218818365692707 | T | T | T |
| 0.8829271229207525 | 0.6371847673950023 | 0.9324631581648813 | T | T | T |
| 0.6973774312919309 | 0.3615138961999486 | 0.8893217471833371 | T | T | T |
| 0.6808322763260370 | 0.4955151384550913 | 0.9072083920370340 | T | T | T |
| 0.6920860705900468 | 0.6264429698551166 | 0.9473595306596740 | T | T | T |
| 0.4849218175008336 | 0.4528586658775329 | 0.7213604946534377 | T | T | T |
| 0.4857164382318973 | 0.6301437870847622 | 0.7129997238724215 | T | T | T |
| 0.6386712197376159 | 0.9377771272080450 | 0.2733578070735795 | T | T | T |
| 0.6782902190754829 | 0.9703924073603010 | 0.0885722177454339 | T | T | T |
| 0.7966419458661614 | 0.9546174061500140 | 0.0022983311792031 | T | T | T |
| 0.9133876204885266 | 0.9342390189991926 | 0.0891682145346167 | T | T | T |
| 0.8920280112429138 | 0.9308721261054748 | 0.2862522686510461 | T | T | T |
| 0.7668793658712481 | 0.9447900280760231 | 0.2285652316385701 | T | T | T |
| 0.6355336282190787 | 0.1746807811370141 | 0.2372854413631769 | T | T | T |
| 0.7010051270281494 | 0.1342172848373544 | 0.0764760278785968 | T | T | T |

**Structure files (CONTCAR) involved in this work:**

|                    |                    |                    |   |   |   |
|--------------------|--------------------|--------------------|---|---|---|
| 0.8138221403132498 | 0.1484219429717501 | 0.9742344377688984 | T | T | T |
| 0.9180308687391945 | 0.1624166066164141 | 0.0921803974930079 | T | T | T |
| 0.8965286970581938 | 0.1607824585606787 | 0.2888711783089391 | T | T | T |
| 0.7692073922263694 | 0.1663268113644003 | 0.2371632256734226 | T | T | T |
| 0.6936955507410766 | 0.0564306987358581 | 0.2387791800325074 | T | T | T |
| 0.9150903593217251 | 0.0466799617898569 | 0.1934285069836888 | T | T | T |
| 0.5723304506518787 | 0.8769558499061958 | 0.4196172737191348 | T | T | T |
| 0.5845408343158464 | 0.0080165891785925 | 0.4242673392254480 | T | T | T |
| 0.6102584026836219 | 0.1381126194971080 | 0.4248235960378212 | T | T | T |
| 0.7963010422140361 | 0.8646576507351335 | 0.3794818108319568 | T | T | T |
| 0.8071973407164063 | 0.9968115652807572 | 0.4025043970501981 | T | T | T |
| 0.8018656935952017 | 0.1288998197806847 | 0.4230973577254538 | T | T | T |
| 0.0120531581316779 | 0.9541947864101853 | 0.2175236143360175 | T | T | T |
| 0.0162568176062938 | 0.1324004785174620 | 0.2151731852662956 | T | T | T |
| 0.8608407191432779 | 0.0753253871534671 | 0.7639248459862841 | T | T | T |
| 0.818488898964908  | 0.0512326398031520 | 0.5808716445766310 | T | T | T |
| 0.7017116421910504 | 0.0513560909111595 | 0.4889033832580632 | T | T | T |
| 0.5911318517485850 | 0.0746749268196693 | 0.5940307899980755 | T | T | T |
| 0.6053112190010278 | 0.0694843022837916 | 0.7894885220244450 | T | T | T |
| 0.7312486317443492 | 0.0611528871114802 | 0.7283209120593473 | T | T | T |
| 0.8608724858896908 | 0.8322024332338275 | 0.7341450476238133 | T | T | T |
| 0.7924038172733557 | 0.8705407277463343 | 0.5759637412762857 | T | T | T |
| 0.6873619169948703 | 0.8215855788090821 | 0.4740576372204732 | T | T | T |
| 0.5930987694118601 | 0.8371479341413519 | 0.6090738197822634 | T | T | T |
| 0.5941230276334701 | 0.8501333867375387 | 0.8074386479982393 | T | T | T |
| 0.7299266849901459 | 0.8524239822421098 | 0.7499724514561177 | T | T | T |
| 0.8138533036941632 | 0.9556353998115062 | 0.7225800966631282 | T | T | T |
| 0.5834796125552033 | 0.9568500430705639 | 0.6861521024692762 | T | T | T |
| 0.9365845040106734 | 0.1376313157340195 | 0.8971279444637126 | T | T | T |
| 0.9040025022745979 | 0.0147258237694004 | 0.9322720958722411 | T | T | T |
| 0.8932650515446660 | 0.8844981542957641 | 0.9106091577432669 | T | T | T |
| 0.6975681121832034 | 0.1399789180386224 | 0.8813733159186568 | T | T | T |
| 0.6944961024175410 | 0.0055361207436801 | 0.8988542584859416 | T | T | T |
| 0.6976199221700896 | 0.8754643688887097 | 0.9549553422838901 | T | T | T |
| 0.4871162072424111 | 0.0473814173893383 | 0.7125513368696431 | T | T | T |
| 0.4822962715392918 | 0.8708077288349664 | 0.7069376841517702 | T | T | T |
| 0.3542986967239686 | 0.4379301403610222 | 0.7143692295119184 | T | T | T |
| 0.3004902687331411 | 0.4278597559031585 | 0.8936947056926173 | T | T | T |
| 0.2018003715947091 | 0.4443606341053276 | 0.0267552782957346 | T | T | T |
| 0.1038589396024363 | 0.4294267179919877 | 0.8927046604593427 | T | T | T |
| 0.1043038281166152 | 0.4462605554845633 | 0.6952435157405460 | T | T | T |
| 0.2286751309903994 | 0.4722686179356029 | 0.7406134999780914 | T | T | T |
| 0.3617665819305089 | 0.6680857528877165 | 0.7440161557522054 | T | T | T |
| 0.3047421632068778 | 0.6615247054205677 | 0.9178253784329542 | T | T | T |
| 0.1927068568696662 | 0.6445415384566160 | 0.0208031291097295 | T | T | T |
| 0.0944377763777328 | 0.6715105919181210 | 0.8945282403498190 | T | T | T |
| 0.1086958613340955 | 0.6549502577192778 | 0.6994380653020220 | T | T | T |
| 0.2333079595152817 | 0.6366806324695103 | 0.7543469591509619 | T | T | T |
| 0.3242627987006939 | 0.5489757614429543 | 0.8157634501889254 | T | T | T |
| 0.0829177638587330 | 0.5501342824498630 | 0.8184262699565121 | T | T | T |
| 0.4302318664711759 | 0.3723126299027957 | 0.5865550617781381 | T | T | T |
| 0.4192286398729931 | 0.5045269210375176 | 0.5679221189326726 | T | T | T |
| 0.4002276735959199 | 0.6370036902073630 | 0.5599952935919102 | T | T | T |

**Structure files (CONTCAR) involved in this work:**

|                    |                    |                    |   |   |   |
|--------------------|--------------------|--------------------|---|---|---|
| 0.1988540440473107 | 0.3716040032605304 | 0.6147397230304362 | T | T | T |
| 0.1835568894711391 | 0.4983196649760537 | 0.5569993727880628 | T | T | T |
| 0.1999770037352835 | 0.6323276947771886 | 0.5601692897372281 | T | T | T |
| 0.9918641056438638 | 0.4530885286062331 | 0.7893357212320604 | T | T | T |
| 0.9898484370749241 | 0.6433372139829997 | 0.7807094635440488 | T | T | T |
| 0.1408464116411220 | 0.5607860295122069 | 0.2150528173548327 | T | T | T |
| 0.1987114325351539 | 0.5666673981262009 | 0.3906438778378181 | T | T | T |
| 0.3012757204243930 | 0.5512534438370742 | 0.5179382194671621 | T | T | T |
| 0.4037138411999976 | 0.5681742644363118 | 0.3937920043229927 | T | T | T |
| 0.3975685646031839 | 0.5522581427531230 | 0.1965513675859036 | T | T | T |
| 0.2699063975422175 | 0.5303372955218471 | 0.2343763499009293 | T | T | T |
| 0.1440936300952155 | 0.3254302743254943 | 0.2408329174276320 | T | T | T |
| 0.1935356070284228 | 0.3415536950934772 | 0.4204858982049386 | T | T | T |
| 0.3098616094259912 | 0.3499854114370887 | 0.5115995843780761 | T | T | T |
| 0.4172680267375766 | 0.3277220810781685 | 0.4001398868121714 | T | T | T |
| 0.3970448203477431 | 0.3386927689817129 | 0.2047658651315344 | T | T | T |
| 0.2719428001909656 | 0.3563474325517175 | 0.2607921904796281 | T | T | T |
| 0.1777811610811639 | 0.4473200763624911 | 0.3029116694599435 | T | T | T |
| 0.4162138622368993 | 0.4476428931500757 | 0.3169814729482144 | T | T | T |
| 0.0681421867888413 | 0.6241384376538689 | 0.0780360835388348 | T | T | T |
| 0.0819059514820611 | 0.4922394441961759 | 0.0651098621365617 | T | T | T |
| 0.1003693390626727 | 0.3607490956390809 | 0.0601587516390884 | T | T | T |
| 0.3088704651595341 | 0.6279020393471799 | 0.1099030180531684 | T | T | T |
| 0.3202025665226930 | 0.4988874204948936 | 0.0570264825820579 | T | T | T |
| 0.3048678383529381 | 0.3649833643661416 | 0.0668297846346942 | T | T | T |
| 0.5123099560232942 | 0.5385024815059439 | 0.2842592884269103 | T | T | T |
| 0.5168341300405314 | 0.3640856022151457 | 0.2805325725318734 | T | T | T |
| 0.4433458659358630 | 0.7488057796299827 | 0.6456464216546969 | T | T | T |
| 0.2011203001710667 | 0.7474363050404045 | 0.6532749077216836 | T | T | T |
| 0.2723885609779178 | 0.7492315341081162 | 0.0583821387621798 | T | T | T |
| 0.1098320492066583 | 0.7477345340739613 | 0.0542981062561812 | T | T | T |
| 0.0613136018857550 | 0.2473535583578705 | 0.1388961568086068 | T | T | T |
| 0.3054011338193556 | 0.2474415029101246 | 0.1555186723626364 | T | T | T |
| 0.2255364810974352 | 0.2495630870115177 | 0.5567888496621781 | T | T | T |
| 0.3914298814201168 | 0.2475734208590289 | 0.5519305294852039 | T | T | T |
| 0.5587661609561864 | 0.2490645646521997 | 0.3563565128318924 | T | T | T |
| 0.8180688656787692 | 0.2534708720702123 | 0.3679807229146217 | T | T | T |
| 0.7272677079648547 | 0.2499697733720032 | 0.9849184757601457 | T | T | T |
| 0.8940540485083682 | 0.2540260675714024 | 0.9493644217833096 | T | T | T |
| 0.9127030958422518 | 0.7551961507373683 | 0.8802713107314527 | T | T | T |
| 0.6848820177307803 | 0.7453868313168327 | 0.8781813160447453 | T | T | T |
| 0.8015416707387411 | 0.7525274138313381 | 0.4814044487594658 | T | T | T |
| 0.5743576066118898 | 0.7497886056242726 | 0.4641451384344855 | T | T | T |
| 0.8000144071694409 | 0.6743517547232430 | 0.0743993289870046 | T | T | T |
| 0.6989775480265690 | 0.7673923434751245 | 0.1266893684427346 | T | T | T |
| 0.8355770393169611 | 0.7981961468592592 | 0.0511919191112813 | T | T | T |
| 0.9896278661247532 | 0.7131932590098224 | 0.3134602747481846 | T | T | T |
| 0.7125777220836251 | 0.6960460398379024 | 0.0524168351606238 | T | T | T |
| 0.7500766788907756 | 0.8214652735783563 | 0.0511679824807227 | T | T | T |
| 0.8556963642503836 | 0.7202461728568735 | 0.9929615216503329 | T | T | T |
| 0.9800459456300078 | 0.6813749322050857 | 0.2601103287917161 | T | T | T |
| 0.8933940177440992 | 0.7966323206976157 | 0.4389118593208371 | T | T | T |
| 0.8936371311999285 | 0.7518116351905221 | 0.5573701272707463 | T | T | T |

**Structure files (CONTCAR) involved in this work:**

0.8919264864543606 0.7074187686778420 0.4384659946633462 T T T  
1.0343190207063788 0.7009296643359793 0.3355573147337210 T T T  
0.8762379844379369 0.7521610936863413 0.4798001727262903 T T T

**Figure S8(a)**

Si Al O Zn H C

1.0000000000000000

20.021999999999985 0.0000000000000000 0.0000000000000000

0.0000000000000000 19.899000000000009 0.0000000000000000

0.0000000000000000 0.0000000000000000 13.382999999999991

93 3 194 2 5 1

Selective dynamics

Direct

0.4244399999999970 0.0580300000000022 0.6471700000000027 T T T  
0.3067399999999978 0.0269899999999978 0.7922399999999996 T T T  
0.2835400000000021 0.0581699999999969 0.0141199999999984 T T T  
0.1246300000000033 0.0614899999999992 0.0117300000000000 T T T  
0.0697400000000030 0.0301199999999966 0.8002600000000015 T T T  
0.1818099999999987 0.0568700000000035 0.6600899999999967 T T T  
0.4197800000000029 0.8261800000000008 0.6668599999999998 T T T  
0.3061999999999969 0.8684000000000012 0.8090100000000007 T T T  
0.2665799999999976 0.8288200000000003 0.0261799999999965 T T T  
0.1123600000000025 0.8263499999999979 0.0084999999999980 T T T  
0.0671000000000035 0.8727700000000027 0.7946400000000011 T T T  
0.1857100000000003 0.8278400000000019 0.6698900000000023 T T T  
0.0779500000000013 0.9400199999999970 0.1472199999999972 T T T  
0.1955400000000012 0.9701499999999967 0.2912299999999988 T T T  
0.2199799999999996 0.9393900000000031 0.5134899999999973 T T T  
0.3790400000000034 0.9355300000000000 0.5123800000000003 T T T  
0.4342299999999994 0.9674199999999971 0.3006400000000014 T T T  
0.3213599999999985 0.9408900000000031 0.1602600000000010 T T T  
0.0836299999999994 0.1709600000000009 0.1653999999999982 T T T  
0.1957599999999999 0.1279299999999992 0.3084300000000013 T T T  
0.2347800000000007 0.1688199999999966 0.5245699999999971 T T T  
0.3894799999999989 0.1730400000000003 0.5084700000000026 T T T  
0.4369099999999975 0.1257799999999989 0.2955299999999994 T T T  
0.3165800000000019 0.1691799999999972 0.1719500000000025 T T T  
0.5764100000000028 0.5544599999999988 0.3528799999999990 T T T  
0.6904800000000009 0.5249000000000024 0.1974999999999980 T T T  
0.7137600000000006 0.5688400000000016 0.9834800000000001 T T T  
0.8728899999999982 0.5729400000000027 0.9814999999999969 T T T  
0.8091000000000008 0.5494399999999970 0.3400600000000011 T T T  
0.5735099999999989 0.3270100000000014 0.3284900000000022 T T T  
0.6941500000000005 0.3709399999999974 0.1890799999999970 T T T  
0.7305500000000009 0.3263800000000003 0.9785200000000032 T T T  
0.8853300000000033 0.3260300000000029 0.9966000000000008 T T T  
0.9438499999999976 0.3755999999999986 0.1916599999999988 T T T  
0.9195100000000025 0.4440400000000011 0.8591399999999965 T T T  
0.8006799999999998 0.4710499999999982 0.7175799999999981 T T T  
0.7710399999999993 0.4353399999999965 0.4934700000000021 T T T  
0.6126300000000029 0.4277200000000008 0.4891199999999998 T T T  
0.5659700000000001 0.4680899999999966 0.7030099999999990 T T T  
0.6757199999999983 0.4476099999999974 0.8540599999999969 T T T  
0.9194400000000016 0.6778899999999979 0.8228200000000001 T T T

**Structure files (CONTCAR) involved in this work:**

|                    |                    |                    |   |   |   |
|--------------------|--------------------|--------------------|---|---|---|
| 0.7705399999999969 | 0.6667899999999989 | 0.4622400000000013 | T | T | T |
| 0.6151600000000030 | 0.6718499999999992 | 0.4850899999999996 | T | T | T |
| 0.5616500000000002 | 0.6265300000000025 | 0.6965300000000028 | T | T | T |
| 0.6756400000000014 | 0.6732799999999983 | 0.8212100000000007 | T | T | T |
| 0.5796300000000016 | 0.9438800000000001 | 0.3546800000000019 | T | T | T |
| 0.6999599999999973 | 0.9724099999999964 | 0.2101100000000002 | T | T | T |
| 0.7224399999999989 | 0.9351800000000026 | 0.9884800000000027 | T | T | T |
| 0.8831800000000030 | 0.9328000000000003 | 0.9923700000000011 | T | T | T |
| 0.9338800000000020 | 0.9678699999999978 | 0.2029300000000021 | T | T | T |
| 0.8234100000000026 | 0.9449299999999994 | 0.3515599999999992 | T | T | T |
| 0.5795400000000015 | 0.1717299999999966 | 0.3255800000000022 | T | T | T |
| 0.6998400000000018 | 0.1310599999999980 | 0.1890000000000001 | T | T | T |
| 0.7334200000000024 | 0.1709400000000016 | 0.9687600000000032 | T | T | T |
| 0.8881000000000014 | 0.1733800000000016 | 0.9837800000000030 | T | T | T |
| 0.9380799999999994 | 0.1254899999999992 | 0.1954899999999995 | T | T | T |
| 0.8225100000000012 | 0.1719799999999978 | 0.3254599999999996 | T | T | T |
| 0.9244699999999995 | 0.0552800000000033 | 0.8551900000000003 | T | T | T |
| 0.8053200000000018 | 0.0271100000000004 | 0.7049400000000006 | T | T | T |
| 0.7824600000000004 | 0.0659800000000033 | 0.4882100000000023 | T | T | T |
| 0.6218700000000013 | 0.0685599999999980 | 0.4879600000000011 | T | T | T |
| 0.5691500000000005 | 0.0311200000000014 | 0.6970900000000029 | T | T | T |
| 0.6818400000000011 | 0.0527099999999976 | 0.8440599999999989 | T | T | T |
| 0.9256699999999967 | 0.8300899999999984 | 0.8320599999999985 | T | T | T |
| 0.8042200000000008 | 0.8703999999999965 | 0.6932299999999998 | T | T | T |
| 0.7719400000000007 | 0.8251100000000022 | 0.4772800000000004 | T | T | T |
| 0.6165900000000022 | 0.8254700000000028 | 0.4874500000000026 | T | T | T |
| 0.5647499999999965 | 0.8740900000000025 | 0.6947800000000015 | T | T | T |
| 0.6802100000000024 | 0.8327799999999996 | 0.8274499999999989 | T | T | T |
| 0.4216100000000012 | 0.4427499999999966 | 0.6449500000000015 | T | T | T |
| 0.3025999999999982 | 0.4699499999999972 | 0.7899900000000031 | T | T | T |
| 0.2785999999999973 | 0.4380400000000009 | 0.0115699999999990 | T | T | T |
| 0.1202800000000011 | 0.4360599999999977 | 0.0125499999999974 | T | T | T |
| 0.0641999999999996 | 0.4690500000000029 | 0.7982000000000014 | T | T | T |
| 0.1773999999999987 | 0.4399999999999977 | 0.6574400000000011 | T | T | T |
| 0.4178100000000029 | 0.6725500000000011 | 0.6605599999999967 | T | T | T |
| 0.3030299999999997 | 0.6286599999999964 | 0.8044700000000020 | T | T | T |
| 0.2664199999999965 | 0.6702000000000012 | 0.0211200000000034 | T | T | T |
| 0.1122399999999999 | 0.6727300000000014 | 0.0048499999999976 | T | T | T |
| 0.0615299999999976 | 0.6277499999999989 | 0.7923299999999998 | T | T | T |
| 0.1818000000000026 | 0.6699199999999976 | 0.6693899999999999 | T | T | T |
| 0.0794199999999989 | 0.5591000000000008 | 0.1460300000000032 | T | T | T |
| 0.1962199999999967 | 0.5263500000000008 | 0.2907999999999973 | T | T | T |
| 0.2165699999999973 | 0.5581999999999994 | 0.5144000000000020 | T | T | T |
| 0.3761200000000002 | 0.5648800000000023 | 0.5098899999999986 | T | T | T |
| 0.4298799999999972 | 0.5290000000000035 | 0.2977699999999999 | T | T | T |
| 0.3203999999999994 | 0.5553700000000035 | 0.1531499999999966 | T | T | T |
| 0.0855299999999986 | 0.3232500000000016 | 0.1619699999999966 | T | T | T |
| 0.1967900000000000 | 0.3687100000000001 | 0.3064600000000013 | T | T | T |
| 0.2321600000000004 | 0.3282299999999978 | 0.5240200000000002 | T | T | T |
| 0.3867800000000017 | 0.3272300000000001 | 0.5057600000000022 | T | T | T |
| 0.4328599999999980 | 0.3709800000000030 | 0.2906100000000009 | T | T | T |
| 0.3145400000000009 | 0.3278400000000019 | 0.1688199999999966 | T | T | T |
| 0.9217700000000022 | 0.5302999999999969 | 0.1905399999999986 | T | T | T |

**Structure files (CONTCAR) involved in this work:**

|                    |                    |                    |   |   |   |
|--------------------|--------------------|--------------------|---|---|---|
| 0.8213099999999969 | 0.3352999999999966 | 0.3230799999999974 | T | T | T |
| 0.8009100000000018 | 0.6330000000000027 | 0.6886599999999987 | T | T | T |
| 0.3587599999999966 | 0.0640900000000002 | 0.7176499999999990 | T | T | T |
| 0.3125000000000000 | 0.0623099999999965 | 0.9011199999999988 | T | T | T |
| 0.2036900000000017 | 0.0438100000000006 | 0.0123999999999995 | T | T | T |
| 0.0968599999999995 | 0.0690600000000003 | 0.8988599999999991 | T | T | T |
| 0.1058000000000021 | 0.0609999999999999 | 0.7017600000000002 | T | T | T |
| 0.2307199999999980 | 0.0347000000000008 | 0.7514600000000016 | T | T | T |
| 0.3623199999999969 | 0.8242899999999977 | 0.7521300000000011 | T | T | T |
| 0.3076399999999992 | 0.8472500000000025 | 0.9256200000000021 | T | T | T |
| 0.1893299999999982 | 0.8526299999999978 | 0.0127600000000001 | T | T | T |
| 0.0856199999999987 | 0.8304600000000022 | 0.8947100000000034 | T | T | T |
| 0.1080699999999979 | 0.8416599999999974 | 0.7001899999999992 | T | T | T |
| 0.2325999999999979 | 0.8526799999999994 | 0.7625699999999966 | T | T | T |
| 0.3248699999999971 | 0.9474299999999971 | 0.7973900000000000 | T | T | T |
| 0.0879699999999985 | 0.9507699999999986 | 0.8111800000000002 | T | T | T |
| 0.4332800000000034 | 0.1273300000000006 | 0.5843199999999982 | T | T | T |
| 0.4183599999999998 | 0.9954499999999982 | 0.5696500000000029 | T | T | T |
| 0.3918099999999995 | 0.8642800000000008 | 0.5679999999999978 | T | T | T |
| 0.2032799999999995 | 0.1305800000000019 | 0.6202200000000033 | T | T | T |
| 0.1844299999999990 | 0.0018400000000014 | 0.5705099999999987 | T | T | T |
| 0.2042199999999994 | 0.8684500000000028 | 0.5684299999999993 | T | T | T |
| 0.9899599999999964 | 0.0406699999999987 | 0.7871400000000008 | T | T | T |
| 0.9873300000000000 | 0.8669500000000028 | 0.7734200000000016 | T | T | T |
| 0.1439700000000030 | 0.9321100000000015 | 0.2167900000000031 | T | T | T |
| 0.1904499999999985 | 0.9355300000000000 | 0.4007000000000005 | T | T | T |
| 0.2999000000000009 | 0.9530600000000007 | 0.5116799999999984 | T | T | T |
| 0.4072299999999984 | 0.9287899999999993 | 0.3996300000000019 | T | T | T |
| 0.3969900000000024 | 0.9367700000000028 | 0.2030200000000022 | T | T | T |
| 0.2716300000000018 | 0.9633499999999984 | 0.2505200000000016 | T | T | T |
| 0.1410100000000014 | 0.1733400000000032 | 0.2507900000000021 | T | T | T |
| 0.1933000000000007 | 0.1478800000000007 | 0.4254000000000033 | T | T | T |
| 0.3123799999999974 | 0.1468899999999991 | 0.5097700000000032 | T | T | T |
| 0.4186100000000010 | 0.1676399999999987 | 0.3959699999999984 | T | T | T |
| 0.3944899999999976 | 0.1570099999999996 | 0.2023000000000010 | T | T | T |
| 0.2701599999999971 | 0.1423300000000012 | 0.2639700000000005 | T | T | T |
| 0.1757800000000032 | 0.0493299999999977 | 0.2950099999999978 | T | T | T |
| 0.4176399999999987 | 0.0471999999999966 | 0.3110500000000016 | T | T | T |
| 0.0671999999999997 | 0.8713300000000004 | 0.0833999999999975 | T | T | T |
| 0.0846200000000010 | 0.0020900000000026 | 0.0690499999999972 | T | T | T |
| 0.1116900000000030 | 0.1324800000000010 | 0.0673499999999976 | T | T | T |
| 0.3000699999999981 | 0.8671000000000006 | 0.1202200000000033 | T | T | T |
| 0.3196200000000005 | 0.9957300000000018 | 0.0704300000000018 | T | T | T |
| 0.2990599999999972 | 0.1289599999999993 | 0.0696799999999982 | T | T | T |
| 0.5136299999999991 | 0.9545900000000032 | 0.2861400000000032 | T | T | T |
| 0.5165999999999968 | 0.1327799999999968 | 0.2734900000000025 | T | T | T |
| 0.6390099999999990 | 0.5572700000000026 | 0.2770000000000010 | T | T | T |
| 0.6955499999999972 | 0.5744200000000035 | 0.1017700000000019 | T | T | T |
| 0.7933299999999974 | 0.5581400000000016 | 0.9651599999999974 | T | T | T |
| 0.8910300000000007 | 0.5804199999999966 | 0.0982199999999978 | T | T | T |
| 0.8863500000000002 | 0.5335099999999997 | 0.3106799999999978 | T | T | T |
| 0.7636800000000008 | 0.5214399999999983 | 0.2506399999999971 | T | T | T |
| 0.6414699999999982 | 0.3359400000000008 | 0.2655299999999983 | T | T | T |

**Structure files (CONTCAR) involved in this work:**

|                    |                    |                    |   |   |   |
|--------------------|--------------------|--------------------|---|---|---|
| 0.6893000000000029 | 0.3313899999999990 | 0.0825699999999969 | T | T | T |
| 0.8076999999999970 | 0.3502200000000002 | 0.9959699999999998 | T | T | T |
| 0.9122899999999987 | 0.3223899999999986 | 0.1120999999999981 | T | T | T |
| 0.9059400000000011 | 0.3672499999999985 | 0.3015199999999965 | T | T | T |
| 0.7681499999999986 | 0.3678000000000026 | 0.2345899999999972 | T | T | T |
| 0.6700200000000009 | 0.4486500000000007 | 0.1684800000000024 | T | T | T |
| 0.9345900000000000 | 0.4500999999999991 | 0.1503399999999999 | T | T | T |
| 0.5707999999999984 | 0.6261200000000002 | 0.4098499999999987 | T | T | T |
| 0.5853499999999983 | 0.4958699999999965 | 0.4365900000000025 | T | T | T |
| 0.5793999999999997 | 0.3620200000000011 | 0.4383499999999998 | T | T | T |
| 0.7975500000000011 | 0.6290199999999970 | 0.3614800000000002 | T | T | T |
| 0.7915500000000009 | 0.5112799999999993 | 0.4483999999999995 | T | T | T |
| 0.8179700000000025 | 0.3818399999999968 | 0.4363799999999998 | T | T | T |
| 0.0103200000000001 | 0.5564200000000028 | 0.2220799999999983 | T | T | T |
| 0.0220399999999970 | 0.3595200000000034 | 0.2145500000000027 | T | T | T |
| 0.8546400000000034 | 0.4320900000000023 | 0.7868399999999980 | T | T | T |
| 0.7908600000000021 | 0.4330500000000015 | 0.6105500000000035 | T | T | T |
| 0.6931200000000004 | 0.4230200000000011 | 0.4728199999999987 | T | T | T |
| 0.5955200000000005 | 0.4276399999999967 | 0.6069200000000023 | T | T | T |
| 0.6023300000000020 | 0.4411500000000004 | 0.8035500000000013 | T | T | T |
| 0.7283800000000014 | 0.4746000000000024 | 0.7702000000000027 | T | T | T |
| 0.8602100000000021 | 0.6823300000000003 | 0.7433899999999980 | T | T | T |
| 0.8164799999999985 | 0.6385000000000005 | 0.5555200000000013 | T | T | T |
| 0.6929900000000018 | 0.6466899999999995 | 0.4837899999999991 | T | T | T |
| 0.5857499999999973 | 0.6662999999999997 | 0.5969699999999989 | T | T | T |
| 0.5968200000000010 | 0.6605100000000022 | 0.7934500000000000 | T | T | T |
| 0.7211599999999976 | 0.6444899999999976 | 0.7314500000000024 | T | T | T |
| 0.8281399999999977 | 0.5467799999999983 | 0.6916099999999972 | T | T | T |
| 0.5810800000000000 | 0.5474999999999994 | 0.6867099999999979 | T | T | T |
| 0.9292200000000008 | 0.3780599999999978 | 0.9298399999999987 | T | T | T |
| 0.9121999999999986 | 0.5102300000000000 | 0.9286699999999968 | T | T | T |
| 0.8955199999999977 | 0.6415399999999991 | 0.9256999999999991 | T | T | T |
| 0.6971699999999998 | 0.3740600000000001 | 0.8940300000000008 | T | T | T |
| 0.6735800000000012 | 0.5029800000000009 | 0.9427900000000022 | T | T | T |
| 0.6899599999999992 | 0.6369499999999988 | 0.9283799999999971 | T | T | T |
| 0.4866400000000013 | 0.4530000000000030 | 0.7157100000000014 | T | T | T |
| 0.4810599999999994 | 0.6327799999999968 | 0.7082100000000011 | T | T | T |
| 0.6443799999999982 | 0.9391000000000034 | 0.2827100000000016 | T | T | T |
| 0.7001199999999983 | 0.9322799999999987 | 0.1047399999999996 | T | T | T |
| 0.8031199999999998 | 0.9396399999999971 | 0.9772999999999996 | T | T | T |
| 0.9020599999999988 | 0.9261699999999990 | 0.1098199999999991 | T | T | T |
| 0.8988599999999991 | 0.9461200000000005 | 0.3072700000000026 | T | T | T |
| 0.7729399999999984 | 0.9647399999999990 | 0.2612600000000000 | T | T | T |
| 0.6428000000000011 | 0.1713799999999992 | 0.2504800000000031 | T | T | T |
| 0.6964200000000034 | 0.1571599999999975 | 0.0744800000000012 | T | T | T |
| 0.8111000000000033 | 0.1473000000000013 | 0.9782599999999988 | T | T | T |
| 0.9152100000000019 | 0.1672799999999981 | 0.0972799999999978 | T | T | T |
| 0.8991100000000003 | 0.1525699999999972 | 0.2935599999999994 | T | T | T |
| 0.7732299999999981 | 0.1449199999999990 | 0.2360600000000019 | T | T | T |
| 0.6828999999999965 | 0.0512000000000015 | 0.1929400000000001 | T | T | T |
| 0.9216699999999989 | 0.0466499999999996 | 0.1784699999999972 | T | T | T |
| 0.5721800000000030 | 0.8737300000000019 | 0.4160499999999985 | T | T | T |
| 0.5850900000000010 | 0.0052299999999974 | 0.4344499999999982 | T | T | T |



**Structure files (CONTCAR) involved in this work:**

|                    |                    |                    |   |   |   |
|--------------------|--------------------|--------------------|---|---|---|
| 0.599899999999981  | 0.1373400000000018 | 0.4315500000000014 | T | T | T |
| 0.8094800000000006 | 0.8695000000000022 | 0.3930099999999968 | T | T | T |
| 0.8169100000000000 | 0.9987500000000011 | 0.4419800000000009 | T | T | T |
| 0.8049200000000027 | 0.1331100000000021 | 0.4294099999999972 | T | T | T |
| 0.0129499999999965 | 0.9517200000000017 | 0.2170500000000004 | T | T | T |
| 0.0180799999999977 | 0.1347400000000007 | 0.2119700000000009 | T | T | T |
| 0.8594700000000017 | 0.0564099999999996 | 0.7833600000000018 | T | T | T |
| 0.8063399999999987 | 0.0724999999999980 | 0.6040399999999977 | T | T | T |
| 0.7018300000000011 | 0.0571699999999993 | 0.4809699999999992 | T | T | T |
| 0.5984199999999973 | 0.0747399999999985 | 0.6038100000000028 | T | T | T |
| 0.6061100000000010 | 0.0505399999999980 | 0.8009800000000027 | T | T | T |
| 0.7312799999999982 | 0.0302500000000023 | 0.7538899999999984 | T | T | T |
| 0.8590099999999978 | 0.8356599999999972 | 0.7646700000000024 | T | T | T |
| 0.8072099999999978 | 0.8328699999999998 | 0.5856700000000004 | T | T | T |
| 0.6944299999999970 | 0.8493899999999996 | 0.4842000000000013 | T | T | T |
| 0.5894100000000009 | 0.8281300000000016 | 0.6014600000000030 | T | T | T |
| 0.6037400000000019 | 0.8510500000000008 | 0.7955200000000033 | T | T | T |
| 0.7300600000000017 | 0.8625899999999973 | 0.7415499999999966 | T | T | T |
| 0.8221800000000030 | 0.9493300000000033 | 0.6778600000000026 | T | T | T |
| 0.5805099999999968 | 0.9522699999999986 | 0.6697500000000005 | T | T | T |
| 0.9331800000000001 | 0.1282799999999966 | 0.9083499999999987 | T | T | T |
| 0.9182399999999973 | 0.9985900000000001 | 0.9424700000000001 | T | T | T |
| 0.9119799999999998 | 0.8655400000000029 | 0.9394300000000015 | T | T | T |
| 0.6976099999999974 | 0.1287900000000022 | 0.8801800000000028 | T | T | T |
| 0.6893699999999967 | 0.0017199999999988 | 0.9381600000000034 | T | T | T |
| 0.6960699999999989 | 0.8671199999999999 | 0.9348900000000029 | T | T | T |
| 0.4904300000000035 | 0.0470699999999979 | 0.7153700000000001 | T | T | T |
| 0.4850500000000011 | 0.8640299999999996 | 0.7119500000000016 | T | T | T |
| 0.3556900000000027 | 0.4347100000000026 | 0.7148400000000024 | T | T | T |
| 0.3052199999999985 | 0.4320799999999991 | 0.8975500000000025 | T | T | T |
| 0.1989799999999988 | 0.4558400000000020 | 0.0159900000000022 | T | T | T |
| 0.0929300000000026 | 0.4342899999999972 | 0.8997299999999981 | T | T | T |
| 0.1018899999999974 | 0.4373199999999997 | 0.7015799999999999 | T | T | T |
| 0.2271500000000017 | 0.4629800000000017 | 0.7472899999999996 | T | T | T |
| 0.3570199999999986 | 0.6707299999999989 | 0.7404300000000035 | T | T | T |
| 0.3067300000000017 | 0.6550700000000020 | 0.9187599999999989 | T | T | T |
| 0.1890199999999993 | 0.6458299999999966 | 0.0078499999999977 | T | T | T |
| 0.0822399999999988 | 0.6677499999999981 | 0.8938500000000005 | T | T | T |
| 0.1040199999999984 | 0.6606999999999985 | 0.7010900000000007 | T | T | T |
| 0.2283299999999997 | 0.6417199999999994 | 0.7603099999999969 | T | T | T |
| 0.3211900000000014 | 0.5491299999999981 | 0.8009800000000027 | T | T | T |
| 0.0797499999999971 | 0.5489299999999986 | 0.8062299999999993 | T | T | T |
| 0.4312200000000033 | 0.3753200000000021 | 0.5777500000000018 | T | T | T |
| 0.4166299999999978 | 0.5067599999999999 | 0.5697199999999967 | T | T | T |
| 0.3935299999999984 | 0.6379700000000028 | 0.5567100000000025 | T | T | T |
| 0.1972700000000032 | 0.3654500000000027 | 0.6181199999999976 | T | T | T |
| 0.1831800000000001 | 0.4927199999999985 | 0.5655799999999971 | T | T | T |
| 0.1966200000000029 | 0.6286500000000004 | 0.5672100000000029 | T | T | T |
| 0.9850199999999987 | 0.4530200000000022 | 0.7882900000000035 | T | T | T |
| 0.9822899999999990 | 0.6367499999999993 | 0.7724100000000007 | T | T | T |
| 0.1415300000000030 | 0.5659500000000008 | 0.2213899999999995 | T | T | T |
| 0.1927200000000013 | 0.5622899999999973 | 0.3985699999999994 | T | T | T |
| 0.2971300000000028 | 0.5485899999999972 | 0.5191700000000026 | T | T | T |

**Structure files (CONTCAR) involved in this work:**

|                    |                    |                    |   |   |   |
|--------------------|--------------------|--------------------|---|---|---|
| 0.399099999999971  | 0.5672700000000006 | 0.3941900000000018 | T | T | T |
| 0.3956400000000002 | 0.558999999999975  | 0.1972000000000023 | T | T | T |
| 0.2699799999999968 | 0.533499999999965  | 0.2431300000000007 | T | T | T |
| 0.1459400000000031 | 0.322859999999986  | 0.2422600000000017 | T | T | T |
| 0.1916399999999996 | 0.3471199999999968 | 0.4225199999999987 | T | T | T |
| 0.3093399999999988 | 0.352499999999991  | 0.5111500000000007 | T | T | T |
| 0.4126199999999969 | 0.3297299999999979 | 0.3909599999999998 | T | T | T |
| 0.3927699999999987 | 0.3417000000000030 | 0.1940799999999996 | T | T | T |
| 0.2719999999999985 | 0.3562200000000004 | 0.2643699999999995 | T | T | T |
| 0.1753199999999993 | 0.447499999999980  | 0.2947399999999973 | T | T | T |
| 0.4139899999999983 | 0.449339999999994  | 0.3081000000000031 | T | T | T |
| 0.0682199999999966 | 0.6257299999999972 | 0.0804899999999975 | T | T | T |
| 0.0792599999999979 | 0.4922600000000017 | 0.0788599999999988 | T | T | T |
| 0.1079300000000032 | 0.3627400000000023 | 0.0611299999999986 | T | T | T |
| 0.2999300000000034 | 0.628999999999978  | 0.1124099999999970 | T | T | T |
| 0.3181799999999981 | 0.499699999999971  | 0.0645799999999994 | T | T | T |
| 0.2923800000000014 | 0.3669799999999981 | 0.0674500000000009 | T | T | T |
| 0.5094399999999979 | 0.5415700000000001 | 0.2881900000000002 | T | T | T |
| 0.5120300000000029 | 0.3620099999999979 | 0.2676999999999978 | T | T | T |
| 0.4381600000000034 | 0.7496099999999970 | 0.6360400000000013 | T | T | T |
| 0.1974200000000010 | 0.7485900000000001 | 0.6476600000000019 | T | T | T |
| 0.2700499999999977 | 0.7490400000000008 | 0.0487499999999983 | T | T | T |
| 0.1076400000000035 | 0.7488900000000029 | 0.0460899999999995 | T | T | T |
| 0.0664099999999976 | 0.2472199999999987 | 0.1309899999999971 | T | T | T |
| 0.3019499999999979 | 0.2482899999999972 | 0.1517499999999998 | T | T | T |
| 0.2286399999999986 | 0.2485100000000031 | 0.5449699999999993 | T | T | T |
| 0.3933800000000005 | 0.2505499999999969 | 0.5456000000000003 | T | T | T |
| 0.5575699999999983 | 0.2485100000000031 | 0.3478800000000035 | T | T | T |
| 0.8159500000000008 | 0.2509999999999977 | 0.3418399999999977 | T | T | T |
| 0.7282999999999973 | 0.2496200000000002 | 0.9380299999999977 | T | T | T |
| 0.8928999999999974 | 0.2513999999999967 | 0.9487900000000025 | T | T | T |
| 0.9456100000000021 | 0.7526900000000012 | 0.8530999999999977 | T | T | T |
| 0.6891400000000019 | 0.7527800000000013 | 0.8387699999999967 | T | T | T |
| 0.7778500000000008 | 0.7466500000000025 | 0.4447299999999998 | T | T | T |
| 0.6104899999999986 | 0.7489500000000007 | 0.4467199999999991 | T | T | T |
| 0.9374499999999983 | 0.4884100000000018 | 0.5144299999999973 | T | T | T |
| 0.0489600000000010 | 0.5568999999999988 | 0.5379999999999967 | T | T | T |
| 0.9140400000000000 | 0.4316699999999969 | 0.4131199999999993 | T | T | T |
| 0.8746200000000002 | 0.5508600000000001 | 0.5543300000000002 | T | T | T |
| 0.0170200000000023 | 0.5761200000000031 | 0.2885399999999976 | T | T | T |
| 0.0643000000000029 | 0.6552399999999992 | 0.4997899999999973 | T | T | T |
| 0.9836900000000028 | 0.6396599999999992 | 0.5506799999999998 | T | T | T |
| 0.0020099999999985 | 0.6139799999999980 | 0.4255799999999965 | T | T | T |
| 0.0114099999999979 | 0.5234900000000025 | 0.5328700000000026 | T | T | T |
| 0.0235699999999994 | 0.6183199999999971 | 0.5022000000000020 | T | T | T |

**Figure S8(b)**

Si Al O Cu H C

1.000000000000000

20.021999999999985 0.000000000000000 0.000000000000000

0.000000000000000 19.899000000000009 0.000000000000000

0.000000000000000 0.000000000000000 13.382999999999991

93 3 196 3 5 1

Selective dynamics

**Structure files (CONTCAR) involved in this work:**

Direct

|                    |                    |                    |   |   |   |
|--------------------|--------------------|--------------------|---|---|---|
| 0.4217215530797016 | 0.0536236050575312 | 0.6435060960843076 | T | T | T |
| 0.2996330025801127 | 0.0274388773685293 | 0.7851774373520157 | T | T | T |
| 0.2787377598441030 | 0.0638597902482447 | 0.0067666201400520 | T | T | T |
| 0.1186897990130227 | 0.0645892120562138 | 0.0078457143163047 | T | T | T |
| 0.0651183966139679 | 0.0222428456437409 | 0.7979969519745544 | T | T | T |
| 0.1727254065505493 | 0.0517006757293767 | 0.6472036017961494 | T | T | T |
| 0.4200207472176253 | 0.8279034878540891 | 0.6601020745330171 | T | T | T |
| 0.3046610053036472 | 0.8693831493504367 | 0.8060946325443292 | T | T | T |
| 0.2684505656031023 | 0.8282705688051178 | 0.0247675047380523 | T | T | T |
| 0.1137911339168943 | 0.8249067498470156 | 0.0118217368411348 | T | T | T |
| 0.0659382026220960 | 0.8624952060652554 | 0.7945741242972399 | T | T | T |
| 0.1860196837305992 | 0.8251384689269606 | 0.6671804873574867 | T | T | T |
| 0.0759757994754114 | 0.9421943371870203 | 0.1451225403246490 | T | T | T |
| 0.1960396567878981 | 0.9720463636279504 | 0.2885436110571283 | T | T | T |
| 0.2177040192836943 | 0.9346396296553146 | 0.5085539023649822 | T | T | T |
| 0.375942332294282  | 0.9320849559284623 | 0.5084205058382676 | T | T | T |
| 0.4284676958017926 | 0.9720656017271522 | 0.2985635067127053 | T | T | T |
| 0.3198217146947466 | 0.9470662283809566 | 0.1485410537630285 | T | T | T |
| 0.0785093524314556 | 0.1716615172116650 | 0.1604409900456274 | T | T | T |
| 0.1965024607102345 | 0.1290305445684813 | 0.3023409022604948 | T | T | T |
| 0.2275415341267476 | 0.1708681060378454 | 0.5219878566973306 | T | T | T |
| 0.3824464693245102 | 0.1714083721936985 | 0.5111983993898687 | T | T | T |
| 0.4333672042020164 | 0.1292807885444580 | 0.3010573342575648 | T | T | T |
| 0.3187207695561198 | 0.1686159516344706 | 0.1676672721238106 | T | T | T |
| 0.5772934189610857 | 0.5526512563770172 | 0.3437527513618719 | T | T | T |
| 0.6992742822208533 | 0.5320468823779436 | 0.2135142996849554 | T | T | T |
| 0.7180899971373604 | 0.5497831075196059 | 0.9835295546626855 | T | T | T |
| 0.8754603662800071 | 0.5663244438008728 | 0.9871378239362661 | T | T | T |
| 0.9324130948727982 | 0.5330737959178873 | 0.1976847572122872 | T | T | T |
| 0.8215730264659918 | 0.5683509412562346 | 0.3407244978552029 | T | T | T |
| 0.5805174413582218 | 0.3304110626853850 | 0.3276488037854419 | T | T | T |
| 0.7042481671372912 | 0.3747633028609996 | 0.2093150211261727 | T | T | T |
| 0.7344833980429333 | 0.3324744505791024 | 0.9898108007879585 | T | T | T |
| 0.8902838510713827 | 0.3303961850025581 | 0.9916033606885147 | T | T | T |
| 0.9365805450000740 | 0.3752554793021105 | 0.2032239819587622 | T | T | T |
| 0.8265214150215632 | 0.3314472435740988 | 0.3470902992197779 | T | T | T |
| 0.9268530453491320 | 0.4467303611463971 | 0.8546589458146694 | T | T | T |
| 0.8045622735026708 | 0.4722668491270824 | 0.7161089236107643 | T | T | T |
| 0.7842870677227076 | 0.4466053519443327 | 0.4907564448911853 | T | T | T |
| 0.6242529595775040 | 0.4351140099441064 | 0.4902352209675293 | T | T | T |
| 0.5646476854774313 | 0.4629040943941777 | 0.7024632693131008 | T | T | T |
| 0.6793444235727860 | 0.4308305630620060 | 0.8361788688240323 | T | T | T |
| 0.7927274727882513 | 0.6293451700169046 | 0.7001023396878894 | T | T | T |
| 0.5647342297254979 | 0.6219760144878684 | 0.7062671756871663 | T | T | T |
| 0.6732059584222599 | 0.6713654536002299 | 0.8443193982649910 | T | T | T |
| 0.5741183568728204 | 0.9504301913924872 | 0.3526377189099179 | T | T | T |
| 0.6975490631852940 | 0.9784529147993583 | 0.2161562282123431 | T | T | T |
| 0.7126449741353913 | 0.9529728393444304 | 0.9884833752347352 | T | T | T |
| 0.8753314021732657 | 0.9430082203152992 | 0.9854089896461119 | T | T | T |
| 0.9320624579415527 | 0.9681191346417916 | 0.2001186144430516 | T | T | T |
| 0.8173858834879031 | 0.9307970181779226 | 0.3357471570635986 | T | T | T |
| 0.5800254835877534 | 0.1758422689331377 | 0.3299411027125106 | T | T | T |

**Structure files (CONTCAR) involved in this work:**

|                    |                    |                    |   |   |   |
|--------------------|--------------------|--------------------|---|---|---|
| 0.7038108795876228 | 0.1339792660620696 | 0.2056767436543220 | T | T | T |
| 0.7343790500188829 | 0.1720509093835023 | 0.9861682887917790 | T | T | T |
| 0.8917659846198811 | 0.1770059909134253 | 0.9827794102689124 | T | T | T |
| 0.9363076763014987 | 0.1268386000825439 | 0.2002619645562238 | T | T | T |
| 0.8239852271429844 | 0.1776644419580704 | 0.3374150195483431 | T | T | T |
| 0.9184231027207488 | 0.0638345044568942 | 0.8487828781794392 | T | T | T |
| 0.8037102805595896 | 0.0359068556408550 | 0.7029879578113016 | T | T | T |
| 0.7808839953813830 | 0.0568097370613130 | 0.4768735452928571 | T | T | T |
| 0.6214418257699786 | 0.0722423291676075 | 0.4875831498248002 | T | T | T |
| 0.5670733456287387 | 0.0361640242638504 | 0.6993481629659761 | T | T | T |
| 0.6825542513752687 | 0.0723553173998280 | 0.8316180128496597 | T | T | T |
| 0.9172992955928334 | 0.8322332518276615 | 0.8254126571681893 | T | T | T |
| 0.7928644886221798 | 0.8769456180444350 | 0.7074833260017953 | T | T | T |
| 0.7645471510505590 | 0.8282909265305736 | 0.4865051106945228 | T | T | T |
| 0.6068229173095768 | 0.8290980952901083 | 0.4860568974278187 | T | T | T |
| 0.5638095047984959 | 0.8778968488371727 | 0.7010625036135734 | T | T | T |
| 0.4217306090827225 | 0.4413393147433924 | 0.6455357384916349 | T | T | T |
| 0.3031191222578720 | 0.4720411686948539 | 0.7898053796411231 | T | T | T |
| 0.2819232776249914 | 0.4345813727136626 | 0.0097581884495210 | T | T | T |
| 0.1225567140291988 | 0.4322160815531054 | 0.0068917376559653 | T | T | T |
| 0.0716913912669250 | 0.4720885559662785 | 0.7965672603321774 | T | T | T |
| 0.1810353129817283 | 0.4469373693639563 | 0.6493610698427018 | T | T | T |
| 0.4231746172954343 | 0.6725481642185387 | 0.6653510857532822 | T | T | T |
| 0.3058978130260950 | 0.6285624393644434 | 0.8061475027050966 | T | T | T |
| 0.2705447928491443 | 0.6713941248383490 | 0.0242829347997240 | T | T | T |
| 0.1166720105736723 | 0.6725526719957545 | 0.0077235953728000 | T | T | T |
| 0.0685829834280469 | 0.6302452701325367 | 0.7949569640511002 | T | T | T |
| 0.1871066084930863 | 0.6675739951414718 | 0.6663004528531127 | T | T | T |
| 0.0771425092717011 | 0.5554126297822497 | 0.1387798140591417 | T | T | T |
| 0.1965798259334314 | 0.5267000963759727 | 0.2839902516997545 | T | T | T |
| 0.2235494121497577 | 0.5624020421879673 | 0.5029675628836154 | T | T | T |
| 0.3841051882064865 | 0.5657030933166382 | 0.5079353106430941 | T | T | T |
| 0.4325474120826929 | 0.5238565860364026 | 0.2973241448187424 | T | T | T |
| 0.3228790562604351 | 0.5528102847642518 | 0.1486554381762800 | T | T | T |
| 0.0796695110247006 | 0.3266479622782630 | 0.1623945821982358 | T | T | T |
| 0.1960171650339625 | 0.3688103983346532 | 0.3053159122572489 | T | T | T |
| 0.2306279384079014 | 0.3275579592597849 | 0.5242864175290450 | T | T | T |
| 0.3855583672813991 | 0.3235057197948628 | 0.5119813024685561 | T | T | T |
| 0.4342219711326195 | 0.3690620658985495 | 0.3013822951017122 | T | T | T |
| 0.3181463669167586 | 0.3272691896511271 | 0.1704592283673552 | T | T | T |
| 0.7644026648948649 | 0.6703394732751936 | 0.4800003396390224 | T | T | T |
| 0.9170079174842374 | 0.6755886433480075 | 0.8164830522408201 | T | T | T |
| 0.6678094095903826 | 0.8306687764182876 | 0.8527998260204932 | T | T | T |
| 0.6091943251204843 | 0.6788001842645662 | 0.4865632542648991 | T | T | T |
| 0.3553614731263058 | 0.0602946684699816 | 0.7124090719299483 | T | T | T |
| 0.2977948405808939 | 0.0693554341087647 | 0.8893600500134744 | T | T | T |
| 0.1985901657282499 | 0.0555979219909126 | 0.0226863213676802 | T | T | T |
| 0.0990490101695358 | 0.0624113457480056 | 0.8907433121513062 | T | T | T |
| 0.0978822312881415 | 0.0508234815205163 | 0.6951205854267105 | T | T | T |
| 0.2263528282443552 | 0.0318222261313757 | 0.7336657737687859 | T | T | T |
| 0.3615191157169327 | 0.8297959269812518 | 0.7440789660889129 | T | T | T |
| 0.3061123711527742 | 0.8407245976705966 | 0.9192740514610575 | T | T | T |
| 0.1906921565140614 | 0.8517404548604476 | 0.0147821896743471 | T | T | T |

**Structure files (CONTCAR) involved in this work:**

|                    |                    |                    |   |   |   |
|--------------------|--------------------|--------------------|---|---|---|
| 0.0870331593076161 | 0.8256449771494093 | 0.8978432518602865 | T | T | T |
| 0.1084223687268663 | 0.8337953900453617 | 0.7004632581724257 | T | T | T |
| 0.2315888239648161 | 0.8562602152149188 | 0.7566429955110636 | T | T | T |
| 0.3192051937057700 | 0.9495803200611568 | 0.8066680441371896 | T | T | T |
| 0.0795248592431407 | 0.9423473438813308 | 0.8084961208381954 | T | T | T |
| 0.4289277813372598 | 0.1216911715150093 | 0.5768940060444996 | T | T | T |
| 0.4179542412066855 | 0.9894940260335477 | 0.5680247816812303 | T | T | T |
| 0.3911009966161226 | 0.8582232446268784 | 0.5552922025536895 | T | T | T |
| 0.1873503847908964 | 0.1264855384599907 | 0.6038706264765596 | T | T | T |
| 0.1760712369922979 | 0.9966057626329097 | 0.5575599664416978 | T | T | T |
| 0.1993143155891706 | 0.8638422694598547 | 0.5622427483898533 | T | T | T |
| 0.9847961082934693 | 0.0332218031550563 | 0.7968077143999399 | T | T | T |
| 0.9884299196792679 | 0.8452377015254132 | 0.7704441894796732 | T | T | T |
| 0.1418265887253884 | 0.9376909251328387 | 0.2147820333894536 | T | T | T |
| 0.1974107562288088 | 0.9289783997798321 | 0.3914670646679004 | T | T | T |
| 0.2970392043024176 | 0.9502333831295587 | 0.5206846846999567 | T | T | T |
| 0.3969846115978957 | 0.9298750597712306 | 0.3914868308144587 | T | T | T |
| 0.3947437524995313 | 0.9489433515657681 | 0.1938101775617905 | T | T | T |
| 0.2690523674027456 | 0.9705420747507907 | 0.2365050955067836 | T | T | T |
| 0.1434946191718373 | 0.1680569140642837 | 0.2320691733172600 | T | T | T |
| 0.1936834923099547 | 0.1626610530389771 | 0.4124047286442201 | T | T | T |
| 0.3050847641433296 | 0.1461027234946051 | 0.5172544928420590 | T | T | T |
| 0.4069741346852694 | 0.1727575183987321 | 0.3957470478323409 | T | T | T |
| 0.3963263441977022 | 0.1567547356572354 | 0.2003454465395515 | T | T | T |
| 0.2710300088361705 | 0.1374351115956068 | 0.2550884629023590 | T | T | T |
| 0.1764800946740771 | 0.0500304712978610 | 0.3104641822043083 | T | T | T |
| 0.4142867270784624 | 0.0512293799768746 | 0.3200746622991857 | T | T | T |
| 0.0679291885196334 | 0.8722755088545243 | 0.0830538001838830 | T | T | T |
| 0.0804520558453009 | 0.0041216588240596 | 0.0660420886594529 | T | T | T |
| 0.0945520396307634 | 0.1363635938762387 | 0.0533064377481555 | T | T | T |
| 0.3038524909644658 | 0.8709290869175074 | 0.1129557648992139 | T | T | T |
| 0.3149148406849630 | 0.9978269583135237 | 0.0535877883797994 | T | T | T |
| 0.3041267456993262 | 0.1320915257053364 | 0.0614298117685337 | T | T | T |
| 0.5075597479983386 | 0.9586567435533504 | 0.2849458035865748 | T | T | T |
| 0.5136732549071031 | 0.1376985615937564 | 0.2885952339220013 | T | T | T |
| 0.6385573081758755 | 0.5706438818089777 | 0.2712589373932437 | T | T | T |
| 0.6877130591313719 | 0.5430838000722841 | 0.0949189327499073 | T | T | T |
| 0.7982325021578148 | 0.5408182967791244 | 0.9831944205109210 | T | T | T |
| 0.9031803801747166 | 0.5721606844395647 | 0.1002804469157665 | T | T | T |
| 0.8972192964554235 | 0.5610447891379969 | 0.2982652093070611 | T | T | T |
| 0.7704780104630526 | 0.5632687742642281 | 0.2452719390950650 | T | T | T |
| 0.6396606459365061 | 0.3320113840262902 | 0.2448564232625558 | T | T | T |
| 0.7078294363468332 | 0.3709071025152861 | 0.0889655886814149 | T | T | T |
| 0.8126680207710965 | 0.3517018887607872 | 0.9761424011475213 | T | T | T |
| 0.9092303838282024 | 0.3314325894765587 | 0.1094386876230011 | T | T | T |
| 0.9009959756389554 | 0.3489437069323980 | 0.3051259726654830 | T | T | T |
| 0.7724702225021065 | 0.3456696448793227 | 0.2580666629193363 | T | T | T |
| 0.6942531874498836 | 0.4528789251475260 | 0.2432112423198030 | T | T | T |
| 0.9172200705118477 | 0.4533745993367468 | 0.1835920445495575 | T | T | T |
| 0.5551953825466930 | 0.6246417527391354 | 0.4034897503702757 | T | T | T |
| 0.5950761874412852 | 0.5006625683382649 | 0.4311533781140008 | T | T | T |
| 0.6064057178900338 | 0.3675276460434963 | 0.4284650590991941 | T | T | T |
| 0.8152710991799912 | 0.6398008645390553 | 0.3961522063894682 | T | T | T |

**Structure files (CONTCAR) involved in this work:**

|                    |                    |                    |   |   |   |
|--------------------|--------------------|--------------------|---|---|---|
| 0.8049226305540641 | 0.5066454845249863 | 0.4159182925052741 | T | T | T |
| 0.8101983308382218 | 0.3756389380309172 | 0.4454700972189197 | T | T | T |
| 0.0119239041515794 | 0.5466753027300324 | 0.2093886871249835 | T | T | T |
| 0.0170475465478571 | 0.3664884880718950 | 0.2130323369595475 | T | T | T |
| 0.8621281505038266 | 0.4366229993865805 | 0.7834551357843783 | T | T | T |
| 0.8189985752964225 | 0.4574160269695735 | 0.5989998680138997 | T | T | T |
| 0.7036974986379301 | 0.4441405279481185 | 0.5037938929398652 | T | T | T |
| 0.5872594029680981 | 0.4297673193466842 | 0.5968281107156179 | T | T | T |
| 0.6040400081024047 | 0.4258908111118319 | 0.7929663212016054 | T | T | T |
| 0.7323052258726378 | 0.4398150563556130 | 0.7451808599203349 | T | T | T |
| 0.8556734448428744 | 0.6747677219561937 | 0.7276940067461056 | T | T | T |
| 0.7784247047988330 | 0.6271380673947810 | 0.5816807791739673 | T | T | T |
| 0.6881282285454395 | 0.6584438094963190 | 0.4466759978774096 | T | T | T |
| 0.5918968373620158 | 0.6577471521377283 | 0.6080097266383385 | T | T | T |
| 0.5987440936135411 | 0.6508257165553966 | 0.8094864600720005 | T | T | T |
| 0.7255937676113127 | 0.6577564305285969 | 0.7559993884707182 | T | T | T |
| 0.8042966785908124 | 0.5521790390866014 | 0.7402614962463392 | T | T | T |
| 0.5820169789582758 | 0.5420469911275415 | 0.7026022418003061 | T | T | T |
| 0.9362270529787170 | 0.3817631378576233 | 0.9274497450396072 | T | T | T |
| 0.9203095652861439 | 0.5131323826044077 | 0.9248596762567206 | T | T | T |
| 0.8864724215324512 | 0.6390104421615060 | 0.9313504169175124 | T | T | T |
| 0.6931387277567390 | 0.3611760510136295 | 0.8952094895428934 | T | T | T |
| 0.6836986414324998 | 0.4958543389952393 | 0.9104252028786599 | T | T | T |
| 0.6961305947904606 | 0.6266067904965060 | 0.9464972876750680 | T | T | T |
| 0.4852743811100371 | 0.4502849994815796 | 0.7193018474738350 | T | T | T |
| 0.4841047965754008 | 0.6323128787511469 | 0.7183154128003018 | T | T | T |
| 0.6369535870422532 | 0.9436147506068047 | 0.2764929016718833 | T | T | T |
| 0.6847688630440019 | 0.9764584846876029 | 0.0962943390235639 | T | T | T |
| 0.7935722121093913 | 0.9335981492984240 | 0.9991366919544475 | T | T | T |
| 0.9089459816349018 | 0.9360114815179034 | 0.0940614328388513 | T | T | T |
| 0.8931415702762323 | 0.9327333606329348 | 0.2920400087559989 | T | T | T |
| 0.7662823075523419 | 0.9378351770211290 | 0.2402282214788843 | T | T | T |
| 0.6366991951245315 | 0.1719519030185283 | 0.2430574202607640 | T | T | T |
| 0.7056264075785189 | 0.1339703992981006 | 0.0846164078055708 | T | T | T |
| 0.8134138134008263 | 0.1557642490650046 | 0.9728223801905762 | T | T | T |
| 0.9155525563083836 | 0.1637395775018726 | 0.0967150819304761 | T | T | T |
| 0.8982544400383882 | 0.1620124082430617 | 0.2937815202073191 | T | T | T |
| 0.7702346347183991 | 0.1723472534217018 | 0.2459619980419071 | T | T | T |
| 0.7038499227280606 | 0.0572939727311257 | 0.2486215257335927 | T | T | T |
| 0.9154976688022864 | 0.0480806373923512 | 0.1970132475963808 | T | T | T |
| 0.5654576755480599 | 0.8853359988221725 | 0.4229438504556997 | T | T | T |
| 0.5817468002361882 | 0.0158532940295458 | 0.4239372396995247 | T | T | T |
| 0.6082582547626469 | 0.1443830450841996 | 0.4337186281483730 | T | T | T |
| 0.8076822384821996 | 0.8613615833888710 | 0.3958734171431396 | T | T | T |
| 0.8053910330072404 | 0.9949782751831188 | 0.4081199376562231 | T | T | T |
| 0.8045498368164347 | 0.1274644388285181 | 0.4276655545088044 | T | T | T |
| 0.0111805187398607 | 0.9536445315358496 | 0.2159728826854882 | T | T | T |
| 0.0165450802088429 | 0.1340146900062738 | 0.2162282815522313 | T | T | T |
| 0.8620928395441406 | 0.0753673335404427 | 0.7639007975783310 | T | T | T |
| 0.8158907421877893 | 0.0499514683338180 | 0.5854626954976020 | T | T | T |
| 0.7004335093622241 | 0.0551208237447561 | 0.4899587380668631 | T | T | T |
| 0.5920685932824608 | 0.0761863069160616 | 0.6000316644822243 | T | T | T |
| 0.6052155231782724 | 0.0679423125850950 | 0.7964510166207965 | T | T | T |

**Structure files (CONTCAR) involved in this work:**

|                    |                    |                    |   |   |   |
|--------------------|--------------------|--------------------|---|---|---|
| 0.7312251295573772 | 0.0670684004643587 | 0.7347251458091060 | T | T | T |
| 0.8601071900035111 | 0.8361134635830331 | 0.7412048260735435 | T | T | T |
| 0.7840340461753733 | 0.8685612545108172 | 0.5878349004911373 | T | T | T |
| 0.6860779244956182 | 0.8396102193477580 | 0.4615884578051448 | T | T | T |
| 0.5957474201576338 | 0.8390153565716091 | 0.6055741760763425 | T | T | T |
| 0.5898848198357100 | 0.8467751304592304 | 0.8042764205748167 | T | T | T |
| 0.7301341540699569 | 0.8508237692154024 | 0.7692864644938787 | T | T | T |
| 0.8073174335889387 | 0.9567419892002282 | 0.7307348734992791 | T | T | T |
| 0.5846539494426656 | 0.9571846163223084 | 0.6895667371542601 | T | T | T |
| 0.9364025070861398 | 0.1345539294119734 | 0.9032372730365714 | T | T | T |
| 0.8886958111373096 | 0.0163044328735222 | 0.9377912227196301 | T | T | T |
| 0.9072860113451725 | 0.8878494548722313 | 0.9120928373559640 | T | T | T |
| 0.6941324348817862 | 0.1431565374750941 | 0.8899294180010525 | T | T | T |
| 0.7001639735463421 | 0.0096932915437536 | 0.9060595106608044 | T | T | T |
| 0.6826390099357672 | 0.8786893906311098 | 0.9643202064488724 | T | T | T |
| 0.4871046596038497 | 0.0472336078942461 | 0.7146018711264872 | T | T | T |
| 0.4822778148534016 | 0.8727798216365251 | 0.6976295334234071 | T | T | T |
| 0.3544609980314696 | 0.4371167548271969 | 0.7121285212888518 | T | T | T |
| 0.3024795097960963 | 0.4288879675974675 | 0.8928207188367920 | T | T | T |
| 0.2019838590429944 | 0.4455753887903465 | 0.0230350339191791 | T | T | T |
| 0.1044055540152822 | 0.4298018648495390 | 0.8890103527779392 | T | T | T |
| 0.1050820207337832 | 0.4492249169103439 | 0.6911176612388443 | T | T | T |
| 0.2292476257440071 | 0.4713392692829784 | 0.7403270023722924 | T | T | T |
| 0.3591886789785768 | 0.6693819501440716 | 0.7389827393361188 | T | T | T |
| 0.3070483335808505 | 0.6603302753852835 | 0.9173964751696756 | T | T | T |
| 0.1934423208197744 | 0.6458715384060020 | 0.0179952525310110 | T | T | T |
| 0.0955701656325016 | 0.6729396664058928 | 0.8912571218510916 | T | T | T |
| 0.1096144717554910 | 0.6549564504447815 | 0.6958182443243754 | T | T | T |
| 0.2322887284942277 | 0.6365108797797594 | 0.7566141204501462 | T | T | T |
| 0.3256597810761348 | 0.5492508036607199 | 0.8112929148921123 | T | T | T |
| 0.0846719996597613 | 0.5512465680732375 | 0.8173477035628973 | T | T | T |
| 0.4300432585495061 | 0.3720430147112522 | 0.5829217239045834 | T | T | T |
| 0.4196532171399925 | 0.5041205086546511 | 0.5669467117842577 | T | T | T |
| 0.4042637382253145 | 0.6369865735079329 | 0.5585189707808034 | T | T | T |
| 0.1978084044799030 | 0.3708316177601685 | 0.6143182980766055 | T | T | T |
| 0.1894410876270953 | 0.4969140822007996 | 0.5541053593404046 | T | T | T |
| 0.2040668366270523 | 0.6309176486265775 | 0.5608629487803753 | T | T | T |
| 0.9927496994700422 | 0.4549769925734685 | 0.7858777950101198 | T | T | T |
| 0.9909435397691945 | 0.6430672599210601 | 0.7773796177215164 | T | T | T |
| 0.1427716809871284 | 0.5609300905539842 | 0.2094577592118728 | T | T | T |
| 0.1970042493825542 | 0.5678158532962835 | 0.3887507268823203 | T | T | T |
| 0.3044785860571832 | 0.5530164611381940 | 0.5047799207116613 | T | T | T |
| 0.4147569599701650 | 0.5706932498639889 | 0.3944262128853592 | T | T | T |
| 0.3973654358630492 | 0.5522321815731948 | 0.1973433112510456 | T | T | T |
| 0.2708349211071743 | 0.5308699204265344 | 0.2356174728898099 | T | T | T |
| 0.1417176749873641 | 0.3276278359720086 | 0.2400714115904713 | T | T | T |
| 0.1923594283108015 | 0.3418273685703395 | 0.4193301447628154 | T | T | T |
| 0.3085362103184837 | 0.3496528053724255 | 0.5108855950940365 | T | T | T |
| 0.4151169435246596 | 0.3252030703973310 | 0.3990629793156532 | T | T | T |
| 0.3956592784536984 | 0.3394758898383158 | 0.2039074614585288 | T | T | T |
| 0.2704062359138835 | 0.3565610407158843 | 0.2592068185386560 | T | T | T |
| 0.1777326049025440 | 0.4483551366423704 | 0.3024789978170903 | T | T | T |
| 0.4114366709349890 | 0.4469125900866237 | 0.3206409117944670 | T | T | T |

**Structure files (CONTCAR) involved in this work:**

|                    |                    |                    |   |   |   |
|--------------------|--------------------|--------------------|---|---|---|
| 0.0686769446586252 | 0.6238669103582498 | 0.0736754402125022 | T | T | T |
| 0.0817510855861781 | 0.4921427760553290 | 0.0623004650719332 | T | T | T |
| 0.1013232512551141 | 0.3609364929417098 | 0.0568502201946057 | T | T | T |
| 0.3089494537650218 | 0.6284619751083655 | 0.1097680607719948 | T | T | T |
| 0.3202414872453447 | 0.4994801960709737 | 0.0568975142482737 | T | T | T |
| 0.3043171904394114 | 0.3657695730989129 | 0.0654734651945523 | T | T | T |
| 0.5128779190247791 | 0.5305940538470741 | 0.2791336239202772 | T | T | T |
| 0.5144456208503307 | 0.3675467102079343 | 0.2823342177553651 | T | T | T |
| 0.4420385839226373 | 0.7501095371151656 | 0.6420265238243890 | T | T | T |
| 0.2036336754639009 | 0.7465409438317691 | 0.6507160880661431 | T | T | T |
| 0.2737687836087798 | 0.7497496748784757 | 0.0559415720578243 | T | T | T |
| 0.1095470230320573 | 0.7481521852821057 | 0.0527750030676499 | T | T | T |
| 0.0591732733700351 | 0.2494628980381820 | 0.1392617848496171 | T | T | T |
| 0.3039054456762361 | 0.2481351991179164 | 0.1533969118654914 | T | T | T |
| 0.2238254869624661 | 0.2491459319117802 | 0.5553328910238253 | T | T | T |
| 0.3894458139029825 | 0.2473878412864121 | 0.5548583430237063 | T | T | T |
| 0.5616442349499455 | 0.2535379072572743 | 0.3535194344836825 | T | T | T |
| 0.8230019253302439 | 0.2535154650356751 | 0.3813622623185968 | T | T | T |
| 0.7226054121439882 | 0.2522881753225009 | 0.9978362585066182 | T | T | T |
| 0.9023660019090404 | 0.2547968612189957 | 0.9516763170862818 | T | T | T |
| 0.9176420385603098 | 0.7567804094824173 | 0.8774433459932753 | T | T | T |
| 0.6766059117065955 | 0.7457656140273359 | 0.8928115598149037 | T | T | T |
| 0.7825094268155404 | 0.7491885401390691 | 0.4988637560738604 | T | T | T |
| 0.5805710818675783 | 0.7564949169144130 | 0.4526376185367763 | T | T | T |
| 0.8030819537473582 | 0.6803832007622387 | 0.0756293095828631 | T | T | T |
| 0.7116431757448807 | 0.7755948561494340 | 0.1184896430385127 | T | T | T |
| 0.8437539518507470 | 0.8025150953633511 | 0.0491773829629725 | T | T | T |
| 0.8431436659306991 | 0.7501038364674462 | 0.2505362042495272 | T | T | T |
| 0.7183996460494140 | 0.7051815092273823 | 0.0393869845237145 | T | T | T |
| 0.7604132513331948 | 0.8347703317951941 | 0.0480761420260661 | T | T | T |
| 0.8609986861340995 | 0.7232851441136899 | 0.9917786138190765 | T | T | T |
| 0.5070000841926088 | 0.6338399755925027 | 0.4040987268360435 | T | T | T |
| 0.9281940799990248 | 0.7950583070073860 | 0.1902215565138894 | T | T | T |
| 0.9352691445245850 | 0.7066342734052944 | 0.2126649891154586 | T | T | T |
| 0.9340296286305853 | 0.7643356727519631 | 0.3160350436473305 | T | T | T |
| 0.8247724725893305 | 0.7283005140463943 | 0.1897932583291228 | T | T | T |
| 0.9133806179257078 | 0.7538340805974092 | 0.2415687242178007 | T | T | T |

**Figure S8(c)**

Si Al O Ga H C

1.0000000000000000

20.0219993591000005 0.0000000000000000 0.0000000000000000

0.0000000000000000 19.8990001678000006 0.0000000000000000

0.0000000000000000 0.0000000000000000 13.3830003737999998

93 3 193 1 6 1

Selective dynamics

Direct

|                    |                    |                    |   |   |   |
|--------------------|--------------------|--------------------|---|---|---|
| 0.4228461839733048 | 0.0570464701696785 | 0.6484364076567007 | T | T | T |
| 0.3017041061233214 | 0.0266314690503789 | 0.7890858411001191 | T | T | T |
| 0.2803922657960626 | 0.0606738634761619 | 0.0124952765507144 | T | T | T |
| 0.1207842957991498 | 0.0640514753950139 | 0.0133358623653382 | T | T | T |
| 0.0681931886335980 | 0.0299218895927032 | 0.8003243621875501 | T | T | T |
| 0.1770463044524594 | 0.0557749761573448 | 0.6509349625155686 | T | T | T |
| 0.4200777542291462 | 0.8271127583466942 | 0.6699948067165838 | T | T | T |



**Structure files (CONTCAR) involved in this work:**

|                    |                    |                    |   |   |   |
|--------------------|--------------------|--------------------|---|---|---|
| 0.3025204586130893 | 0.8684238484332333 | 0.8093190114893799 | T | T | T |
| 0.2679095095462612 | 0.8284874482773812 | 0.0297754025796722 | T | T | T |
| 0.1128420460688014 | 0.8267575458908832 | 0.0172663854551406 | T | T | T |
| 0.0622602492754164 | 0.8706762469196039 | 0.8029965252880394 | T | T | T |
| 0.1796646966505967 | 0.8283992916691251 | 0.6731781087288864 | T | T | T |
| 0.0758911479939165 | 0.9431482477774052 | 0.1504691825117820 | T | T | T |
| 0.1969651103952595 | 0.9732167322057199 | 0.2927718705901863 | T | T | T |
| 0.2173350898246607 | 0.9373227912033274 | 0.5139248383980985 | T | T | T |
| 0.3768306260782046 | 0.9340619772316432 | 0.5156286808165650 | T | T | T |
| 0.4306601622348320 | 0.9696023106384556 | 0.3047519470904793 | T | T | T |
| 0.3214592868501682 | 0.9451260612021515 | 0.1548827571753742 | T | T | T |
| 0.0785833012410732 | 0.1729571323331435 | 0.1657599701227089 | T | T | T |
| 0.1964663346917462 | 0.1305235774627526 | 0.3074396092743380 | T | T | T |
| 0.2320235927452416 | 0.1730488172383717 | 0.5250793199525906 | T | T | T |
| 0.3866374051811897 | 0.1737739942427757 | 0.5130643267495054 | T | T | T |
| 0.4370537102170153 | 0.1278317186885743 | 0.3024071239005054 | T | T | T |
| 0.3194342847400459 | 0.1677609032750669 | 0.1710417312857911 | T | T | T |
| 0.5829709050931469 | 0.5555887174922411 | 0.3492033091488777 | T | T | T |
| 0.6947200977851431 | 0.5298672996829644 | 0.1879121103954759 | T | T | T |
| 0.7145243172674183 | 0.5647230787525270 | 0.9730610977589008 | T | T | T |
| 0.8730145064180206 | 0.5600454551724475 | 0.9773485070710038 | T | T | T |
| 0.9356355248003457 | 0.5284837812437211 | 0.1875467332279201 | T | T | T |
| 0.5781715889488169 | 0.3288903109921539 | 0.3340783080024624 | T | T | T |
| 0.7065224366561497 | 0.3738947725793308 | 0.2126071844598433 | T | T | T |
| 0.7349686305042027 | 0.3291723773431927 | 0.9932206254263289 | T | T | T |
| 0.8866391550478879 | 0.3279660544085506 | 0.9826601400944323 | T | T | T |
| 0.9376049996176379 | 0.3717940622998056 | 0.1994262034056849 | T | T | T |
| 0.9277308592565400 | 0.4375420457603051 | 0.8428974478365163 | T | T | T |
| 0.7820073710349669 | 0.4394759878970159 | 0.4810731708728597 | T | T | T |
| 0.6226321424645559 | 0.4317046307406400 | 0.4914122529125855 | T | T | T |
| 0.5681172628030031 | 0.4669377366136553 | 0.7071658222776911 | T | T | T |
| 0.6734751463612265 | 0.4348896183782427 | 0.8537840785848133 | T | T | T |
| 0.9188941652839047 | 0.6722340466701178 | 0.8292767637205452 | T | T | T |
| 0.8004357300691229 | 0.6323724840820842 | 0.6971855328478705 | T | T | T |
| 0.7707736755142421 | 0.6690406241760143 | 0.4789793975140435 | T | T | T |
| 0.6147373510699766 | 0.6703485997193200 | 0.4858242696476541 | T | T | T |
| 0.5664389183266628 | 0.6256327441082397 | 0.7042569702189169 | T | T | T |
| 0.6827381362639540 | 0.6813530686271435 | 0.8250666665280096 | T | T | T |
| 0.5754197555121841 | 0.9431390651544103 | 0.3648195793528308 | T | T | T |
| 0.6952168299148430 | 0.9728575362077634 | 0.2211442004387597 | T | T | T |
| 0.7183393026440401 | 0.9425726976613871 | 0.9989532679796990 | T | T | T |
| 0.8783804669423007 | 0.9339483799564957 | 0.9953874754153871 | T | T | T |
| 0.9313671211270785 | 0.9697764541042060 | 0.2067270143183059 | T | T | T |
| 0.8206453326942326 | 0.9405251542782141 | 0.3547077909408693 | T | T | T |
| 0.5811315495543699 | 0.1742180639656830 | 0.3357606700880203 | T | T | T |
| 0.6985787108265599 | 0.1307653921709463 | 0.2001868967809078 | T | T | T |
| 0.7318435545329560 | 0.1727644269751075 | 0.9792037226484508 | T | T | T |
| 0.8860888687310925 | 0.1733336329357848 | 0.9954230515860157 | T | T | T |
| 0.9340698806549320 | 0.1282634701311348 | 0.2070682587996659 | T | T | T |
| 0.8191513119514310 | 0.1689626467203443 | 0.3406180777245520 | T | T | T |
| 0.9241685847644080 | 0.0580028969249039 | 0.8627933897791157 | T | T | T |
| 0.8052125642279726 | 0.0299332003929311 | 0.7232582483176205 | T | T | T |
| 0.7811464355650996 | 0.0576027641897794 | 0.4973602087998349 | T | T | T |

**Structure files (CONTCAR) involved in this work:**

|                    |                    |                    |   |   |   |
|--------------------|--------------------|--------------------|---|---|---|
| 0.6213182384990549 | 0.0670608468138992 | 0.4949062390365232 | T | T | T |
| 0.5678228950236793 | 0.0323522384414629 | 0.7034107543808507 | T | T | T |
| 0.6779983727858306 | 0.0583799123934187 | 0.8543309236792924 | T | T | T |
| 0.9180064193745472 | 0.8252141961631604 | 0.8400113083332973 | T | T | T |
| 0.8030675100675987 | 0.8741530937952199 | 0.7055407794546471 | T | T | T |
| 0.7685854286829429 | 0.8304031766896275 | 0.4883593603497115 | T | T | T |
| 0.6133079877292341 | 0.8256233157012134 | 0.4973053512248328 | T | T | T |
| 0.5627907237850405 | 0.8755533821253610 | 0.7038027564325664 | T | T | T |
| 0.6782672376634692 | 0.8376062075198706 | 0.8374151617107058 | T | T | T |
| 0.4235385240918620 | 0.4453891018629770 | 0.6410753638182219 | T | T | T |
| 0.3033824266505428 | 0.4738429449601351 | 0.7875569599879179 | T | T | T |
| 0.2860182205575330 | 0.4336579884556724 | 0.0067748013444973 | T | T | T |
| 0.1286284448920542 | 0.4321522580416349 | 0.0045494022451518 | T | T | T |
| 0.0764177282876692 | 0.4725437819954854 | 0.7974362512114297 | T | T | T |
| 0.1819585701550769 | 0.4497613615888898 | 0.6436846483147928 | T | T | T |
| 0.4248005040987001 | 0.6721754777363824 | 0.6629450109370748 | T | T | T |
| 0.3024331890905196 | 0.6305373991130125 | 0.7995802792513326 | T | T | T |
| 0.2706040916717867 | 0.6725494776873374 | 0.0182823636716997 | T | T | T |
| 0.1163823207522222 | 0.6738255555317429 | 0.0081510572396289 | T | T | T |
| 0.0665926982450350 | 0.6299343167409258 | 0.7989316592843974 | T | T | T |
| 0.1802531927331420 | 0.6698644804206123 | 0.6626237291605949 | T | T | T |
| 0.0805849542379519 | 0.5538520815128397 | 0.1356395094208119 | T | T | T |
| 0.2019248982588017 | 0.5279216323139686 | 0.2804126975104657 | T | T | T |
| 0.2227349299614667 | 0.5677831185852963 | 0.5015848009026355 | T | T | T |
| 0.3833026748774104 | 0.5692538334483687 | 0.5046323117732768 | T | T | T |
| 0.4345525974860560 | 0.5274115588033451 | 0.2954196749239966 | T | T | T |
| 0.3287333560845260 | 0.5526244748004373 | 0.1416903243801487 | T | T | T |
| 0.0822770840468978 | 0.3280313340314765 | 0.1568169407271710 | T | T | T |
| 0.1982184938347741 | 0.3698981861024854 | 0.3026433022732088 | T | T | T |
| 0.2329748461779009 | 0.3296129219208736 | 0.5220240413998974 | T | T | T |
| 0.3874044851658635 | 0.3271868798603425 | 0.5098904590639548 | T | T | T |
| 0.4353379581926017 | 0.3701096470106523 | 0.2954841106860396 | T | T | T |
| 0.3191706972652200 | 0.3261798140464307 | 0.1659017305175290 | T | T | T |
| 0.8100124550462841 | 0.5642354477092443 | 0.3278730058603876 | T | T | T |
| 0.8299348993126310 | 0.3280446517148064 | 0.3475424333984548 | T | T | T |
| 0.7974929447548375 | 0.4721091654038091 | 0.7252233712258263 | T | T | T |
| 0.3572951772766013 | 0.0623470164697335 | 0.7191521816174036 | T | T | T |
| 0.2994501566740820 | 0.0658221605640476 | 0.8951877569015236 | T | T | T |
| 0.2003217254901787 | 0.0517375267609215 | 0.0285280790313307 | T | T | T |
| 0.1021979839261225 | 0.0670791151567778 | 0.8957826258192390 | T | T | T |
| 0.1024183104015212 | 0.0572165732903565 | 0.6981212402437239 | T | T | T |
| 0.2286783148891639 | 0.0315187329453838 | 0.7372838685865203 | T | T | T |
| 0.3580867033725486 | 0.8260948887787238 | 0.7481021735530675 | T | T | T |
| 0.3046662063018591 | 0.8432723207889951 | 0.9241926421621921 | T | T | T |
| 0.1901304537656255 | 0.8521198605091916 | 0.0211207100596670 | T | T | T |
| 0.0850578552832567 | 0.8320380711599714 | 0.9041444364146904 | T | T | T |
| 0.1023196017086502 | 0.8382287300135732 | 0.7084215579397077 | T | T | T |
| 0.2285904422129803 | 0.8548206365295228 | 0.7623225361526403 | T | T | T |
| 0.3206103984076273 | 0.9478657430542261 | 0.8041801776967785 | T | T | T |
| 0.0806782380902000 | 0.9496570515393342 | 0.8120766808215003 | T | T | T |
| 0.4311631033828188 | 0.1265778381172170 | 0.5857938406098300 | T | T | T |
| 0.4169789032462278 | 0.9948322454040133 | 0.5699610554147003 | T | T | T |
| 0.3972230914531840 | 0.8628192277667303 | 0.5662139656496497 | T | T | T |

**Structure files (CONTCAR) involved in this work:**

|                    |                    |                    |   |   |   |
|--------------------|--------------------|--------------------|---|---|---|
| 0.1947994366531056 | 0.1308283006999315 | 0.6121762135947344 | T | T | T |
| 0.1790842017325531 | 0.0030213763590635 | 0.5581276806349401 | T | T | T |
| 0.1931005844986002 | 0.8692575144540244 | 0.5702076353938926 | T | T | T |
| 0.9892212783641248 | 0.0469686345257784 | 0.7923974604429695 | T | T | T |
| 0.9822869846422728 | 0.8612192329270569 | 0.7872159907011955 | T | T | T |
| 0.1419949780828332 | 0.9392754788976941 | 0.2199431120989642 | T | T | T |
| 0.1985971329556457 | 0.9307777468823343 | 0.3964535435771869 | T | T | T |
| 0.2972387331950896 | 0.9473680013911810 | 0.5295069152665366 | T | T | T |
| 0.3963955296445935 | 0.9302945986871973 | 0.3983655981429539 | T | T | T |
| 0.3963402779183381 | 0.9452480989289628 | 0.2009144434830683 | T | T | T |
| 0.2701804381837326 | 0.9705031681293962 | 0.2411943388979185 | T | T | T |
| 0.1416833224380329 | 0.1705698109633640 | 0.2415473018710987 | T | T | T |
| 0.1948173103008106 | 0.1623234902681910 | 0.4187482100384849 | T | T | T |
| 0.3092452677983790 | 0.1481732610231868 | 0.5161109500450782 | T | T | T |
| 0.4140054025439734 | 0.1708779685006558 | 0.3994658477806487 | T | T | T |
| 0.3966418132426629 | 0.1557292144933661 | 0.2050178455410821 | T | T | T |
| 0.2705571860448736 | 0.1394721435014044 | 0.2590847304572941 | T | T | T |
| 0.1773661549124329 | 0.0512562111197341 | 0.3133179956512240 | T | T | T |
| 0.4185589673913842 | 0.0495526683044583 | 0.3213358684768188 | T | T | T |
| 0.0675947476913925 | 0.8717580764797255 | 0.0922233479475398 | T | T | T |
| 0.0811269252437653 | 0.0027284634088287 | 0.0674083947499198 | T | T | T |
| 0.0982651268237629 | 0.1350906533203231 | 0.0622569199399371 | T | T | T |
| 0.3037704886368188 | 0.8692288054395231 | 0.1195541434965532 | T | T | T |
| 0.3179392804929738 | 0.9953356990314957 | 0.0591426519795451 | T | T | T |
| 0.3051843846264639 | 0.1292037489523304 | 0.0664449860824353 | T | T | T |
| 0.5095438863883801 | 0.9526707884199891 | 0.2956672499119457 | T | T | T |
| 0.5169042035151152 | 0.1364226358047970 | 0.2852804101466491 | T | T | T |
| 0.6433921608446030 | 0.5614354135114590 | 0.2700822631105924 | T | T | T |
| 0.6785327503116598 | 0.5661755137408018 | 0.0814018461607439 | T | T | T |
| 0.7938821301906990 | 0.5464943132679924 | 0.9854801058495398 | T | T | T |
| 0.9072582098000217 | 0.5630697779533047 | 0.0880067321627921 | T | T | T |
| 0.9003247806419320 | 0.5678922118198574 | 0.2877054431784940 | T | T | T |
| 0.7705796201568520 | 0.5468361926908880 | 0.2182218190716680 | T | T | T |
| 0.6433364552719604 | 0.3358159592914079 | 0.2646738593888049 | T | T | T |
| 0.7245537192306117 | 0.3303393978275326 | 0.1128670131230005 | T | T | T |
| 0.8106771522476706 | 0.3555577253824644 | 0.9660243379976750 | T | T | T |
| 0.9094363362362258 | 0.3383822698227195 | 0.0970923084572986 | T | T | T |
| 0.9092931466346046 | 0.3351295500517658 | 0.2960499827374485 | T | T | T |
| 0.7698873796040892 | 0.3761862779807033 | 0.2859828768811210 | T | T | T |
| 0.6822397650389541 | 0.4490155410900860 | 0.1792193056194553 | T | T | T |
| 0.9149348501875094 | 0.4515801309838324 | 0.1990650879484464 | T | T | T |
| 0.5715973609546100 | 0.6272959070743674 | 0.4051754158039836 | T | T | T |
| 0.6001895007583659 | 0.4999679068584847 | 0.4345372557998367 | T | T | T |
| 0.5876904316020658 | 0.3669335049225900 | 0.4406812874683054 | T | T | T |
| 0.8071943366109028 | 0.6435110666592094 | 0.3790029518494045 | T | T | T |
| 0.8025249734243173 | 0.5029492595014918 | 0.4167896732194072 | T | T | T |
| 0.8322443825291966 | 0.3735069878580776 | 0.4653254053054331 | T | T | T |
| 0.0141309225211352 | 0.5439947182977174 | 0.2049082217845096 | T | T | T |
| 0.0192037925492429 | 0.3714496854422673 | 0.1967833274203638 | T | T | T |
| 0.8739146100878940 | 0.4290767376156810 | 0.7525065761965420 | T | T | T |
| 0.8105009061226075 | 0.4516046541535411 | 0.5971868498746007 | T | T | T |
| 0.7034214379041782 | 0.4229481353215715 | 0.4856370354447721 | T | T | T |
| 0.5989515298408786 | 0.4340290305792998 | 0.6064320578893906 | T | T | T |

**Structure files (CONTCAR) involved in this work:**

|                    |                    |                    |   |   |   |
|--------------------|--------------------|--------------------|---|---|---|
| 0.5990773667957616 | 0.4294786716942415 | 0.8042164340365725 | T | T | T |
| 0.7304252744085582 | 0.4286622283889228 | 0.7696565669168419 | T | T | T |
| 0.8643567758492844 | 0.6744176273973947 | 0.7404178054973342 | T | T | T |
| 0.8068601479804467 | 0.6343431100618547 | 0.5759549448806968 | T | T | T |
| 0.6922406684989545 | 0.6463550297558099 | 0.4805715847709116 | T | T | T |
| 0.5859169196588302 | 0.6582895277364113 | 0.5973609683714363 | T | T | T |
| 0.6059696302997672 | 0.6639612033731318 | 0.7938430639300242 | T | T | T |
| 0.7307451678873611 | 0.6698203143370142 | 0.7279761422915304 | T | T | T |
| 0.8023136435803825 | 0.5573201565361342 | 0.7416715006293831 | T | T | T |
| 0.5862022459397341 | 0.5466649318632739 | 0.7069727749555023 | T | T | T |
| 0.9362279382369694 | 0.3693307327619107 | 0.9077766324418808 | T | T | T |
| 0.9078964223318136 | 0.4989746277282788 | 0.9162237734048176 | T | T | T |
| 0.8904989396888552 | 0.6312366605416129 | 0.9252124255031582 | T | T | T |
| 0.6803993155316987 | 0.3760074114790272 | 0.9375957409780189 | T | T | T |
| 0.6779524059956054 | 0.5085894115121341 | 0.9058496605394180 | T | T | T |
| 0.7075209460921956 | 0.6375398119042909 | 0.9200747026234815 | T | T | T |
| 0.4876182202723073 | 0.4572058415914271 | 0.7120630542758379 | T | T | T |
| 0.4861529153549713 | 0.6350699841955103 | 0.7207027093166248 | T | T | T |
| 0.6406957701466987 | 0.9376574350775797 | 0.2936556512378837 | T | T | T |
| 0.6938847540298057 | 0.9352841926070686 | 0.1136880581419002 | T | T | T |
| 0.7990388146108575 | 0.9496022104658851 | 0.9906796594547203 | T | T | T |
| 0.9027903185903638 | 0.9288648914750366 | 0.1105797739061708 | T | T | T |
| 0.8956529930043400 | 0.9431446309522884 | 0.3082589927686594 | T | T | T |
| 0.7695270619959390 | 0.9645436079475863 | 0.2675781107559502 | T | T | T |
| 0.6425763975302553 | 0.1748536491312608 | 0.2575534779477483 | T | T | T |
| 0.6969892749840890 | 0.1542404306403187 | 0.0846194533829048 | T | T | T |
| 0.8094154518798766 | 0.1474851198707177 | 0.9834321880107240 | T | T | T |
| 0.9084572320332749 | 0.1719794266574005 | 0.1117305825505226 | T | T | T |
| 0.8968121768158190 | 0.1542987786756594 | 0.3071413346759038 | T | T | T |
| 0.7720087000146673 | 0.1419437655159342 | 0.2484329555089526 | T | T | T |
| 0.6775230946765627 | 0.0519302277236043 | 0.2087502426499560 | T | T | T |
| 0.9175954881380805 | 0.0492261952123172 | 0.1879765197907229 | T | T | T |
| 0.5670586282314013 | 0.8738447934738731 | 0.4280575317425598 | T | T | T |
| 0.5803922559722764 | 0.0059686029542785 | 0.4422369075936325 | T | T | T |
| 0.6036488132852026 | 0.1370585136963645 | 0.4386350908835954 | T | T | T |
| 0.8041727536620131 | 0.8641142344874952 | 0.3909618737812602 | T | T | T |
| 0.8155863257338205 | 0.9907757765347707 | 0.4499942192383598 | T | T | T |
| 0.8046186505958267 | 0.1248903801524339 | 0.4407878430247393 | T | T | T |
| 0.0109194977494033 | 0.9555127935264088 | 0.2202581667258524 | T | T | T |
| 0.0146121048668439 | 0.1378894888760313 | 0.2193288852519525 | T | T | T |
| 0.8588988520961226 | 0.0693591485935012 | 0.7927376746157131 | T | T | T |
| 0.8053233027833318 | 0.0628676850750598 | 0.6128305682425893 | T | T | T |
| 0.7004069964102135 | 0.0498770960740961 | 0.4891517920135691 | T | T | T |
| 0.5982118461312130 | 0.0754317493163438 | 0.6106562179646893 | T | T | T |
| 0.6032868694989865 | 0.0536358998746871 | 0.8077715294185717 | T | T | T |
| 0.7302427621593125 | 0.0356375630531289 | 0.7679697524576163 | T | T | T |
| 0.8554533713655330 | 0.8255668874139167 | 0.7631415516617225 | T | T | T |
| 0.8056932155259038 | 0.8582825768073025 | 0.5875624493271687 | T | T | T |
| 0.6901546072759112 | 0.8520468106827438 | 0.4913071872321837 | T | T | T |
| 0.5873710944956677 | 0.8278912799387259 | 0.6123081278563777 | T | T | T |
| 0.6013716142262985 | 0.8531731365120965 | 0.8052991505718252 | T | T | T |
| 0.7277042317714600 | 0.8625672753768451 | 0.7477280009976809 | T | T | T |
| 0.8269492659463906 | 0.9512613996052734 | 0.7229219502756076 | T | T | T |

**Structure files (CONTCAR) involved in this work:**

|                    |                    |                    |   |   |   |
|--------------------|--------------------|--------------------|---|---|---|
| 0.5802907195555509 | 0.9533038147204914 | 0.6782064896711829 | T | T | T |
| 0.9350297210138523 | 0.1251355489420221 | 0.9301699048987263 | T | T | T |
| 0.9174205908463626 | 0.9936856720624435 | 0.9369423091538636 | T | T | T |
| 0.8968969579745758 | 0.8625441332362445 | 0.9432550810648705 | T | T | T |
| 0.6928046200351650 | 0.1349768290904220 | 0.8889493216339948 | T | T | T |
| 0.6840482969956311 | 0.0091211325042471 | 0.9508129694093825 | T | T | T |
| 0.6948720307988716 | 0.8754848191548100 | 0.9411242179329625 | T | T | T |
| 0.4884995764064584 | 0.0470136115798971 | 0.7175833215253109 | T | T | T |
| 0.4826881147489392 | 0.8667859508969491 | 0.7204927206451466 | T | T | T |
| 0.3571680642771076 | 0.4429346198394392 | 0.7104367829595006 | T | T | T |
| 0.3025716680586361 | 0.4283099044168388 | 0.8882606377382627 | T | T | T |
| 0.2067858947388403 | 0.4494461688027366 | 0.0235322904074091 | T | T | T |
| 0.1125482902001245 | 0.4298306211287936 | 0.8853108606245306 | T | T | T |
| 0.1051881727141532 | 0.4535214036535866 | 0.6863464176623416 | T | T | T |
| 0.2300210928624166 | 0.4719884473869425 | 0.7352288300044687 | T | T | T |
| 0.3580603936426792 | 0.6660140845440057 | 0.7306139766511539 | T | T | T |
| 0.3020076692287828 | 0.6683654034612843 | 0.9066746276076643 | T | T | T |
| 0.1931089080243462 | 0.6470450384666759 | 0.0145193950463609 | T | T | T |
| 0.0921117322559319 | 0.6749831593997605 | 0.8923885055657116 | T | T | T |
| 0.1031437449622562 | 0.6553100065988294 | 0.6968584616475281 | T | T | T |
| 0.2293148021432361 | 0.6372667126184069 | 0.7468254333074471 | T | T | T |
| 0.3201964946639959 | 0.5514898548818523 | 0.8155829574667558 | T | T | T |
| 0.0860485193260711 | 0.5518290558151658 | 0.8207031416025458 | T | T | T |
| 0.4320767623426808 | 0.3745771576368393 | 0.5822258179420727 | T | T | T |
| 0.4181434794448092 | 0.5052060406842634 | 0.5587020524818542 | T | T | T |
| 0.4110377852946969 | 0.6381949540554456 | 0.5542112283868668 | T | T | T |
| 0.1957388973790491 | 0.3733823237501933 | 0.6081521543865567 | T | T | T |
| 0.1884992241364632 | 0.5006329578907530 | 0.5493696814552005 | T | T | T |
| 0.1926478771850312 | 0.6348286415827629 | 0.5543648289228853 | T | T | T |
| 0.9981015089888179 | 0.4535155082276690 | 0.7872291638149732 | T | T | T |
| 0.9862710802782275 | 0.6359932222125719 | 0.7852816180947321 | T | T | T |
| 0.1448730856536926 | 0.5598210060500174 | 0.2081790911925234 | T | T | T |
| 0.2034514987820596 | 0.5707570580931792 | 0.3838834882491338 | T | T | T |
| 0.3027281118761389 | 0.5639104900787120 | 0.5192736972570681 | T | T | T |
| 0.4022199514886305 | 0.5700221506636822 | 0.3872742255204872 | T | T | T |
| 0.4024785927802541 | 0.5554948815526994 | 0.1916914445751236 | T | T | T |
| 0.2742067444402042 | 0.5328617070801539 | 0.2271042539804496 | T | T | T |
| 0.1412325549950860 | 0.3312971333814654 | 0.2395852819413155 | T | T | T |
| 0.1955651023467686 | 0.3411695642910071 | 0.4157967691261424 | T | T | T |
| 0.3102335411344694 | 0.3539913965512365 | 0.5125741495904602 | T | T | T |
| 0.4140344099491320 | 0.3293086228741353 | 0.3957823654103079 | T | T | T |
| 0.3960125569267172 | 0.3391733972153173 | 0.1994213698407058 | T | T | T |
| 0.2711360002646586 | 0.3567211223514487 | 0.2533115315634817 | T | T | T |
| 0.1831261324888877 | 0.4502148666148045 | 0.3039613420430134 | T | T | T |
| 0.4151261124249876 | 0.4486292440324847 | 0.3102470473455082 | T | T | T |
| 0.0701108856165578 | 0.6230795019717394 | 0.0734385759969855 | T | T | T |
| 0.0848493650596981 | 0.4912660185341344 | 0.0577845460494370 | T | T | T |
| 0.1089987109613429 | 0.3597013904337805 | 0.0514520803465769 | T | T | T |
| 0.3122460507175330 | 0.6258666228663936 | 0.0949366612598135 | T | T | T |
| 0.3282167024764462 | 0.4954259462519731 | 0.0547630717859366 | T | T | T |
| 0.3047430138452422 | 0.3626669862664305 | 0.0592480706965912 | T | T | T |
| 0.5147344735099791 | 0.5360822590223900 | 0.2904147458400326 | T | T | T |
| 0.5146589972129874 | 0.3618431917742366 | 0.2750963855591467 | T | T | T |

**Structure files (CONTCAR) involved in this work:**

|                     |                    |                    |   |   |   |
|---------------------|--------------------|--------------------|---|---|---|
| 0.4417405395521665  | 0.7506479894023040 | 0.6443401991048925 | T | T | T |
| 0.1938361363227099  | 0.7495171169903592 | 0.6508936331450285 | T | T | T |
| 0.2736461982733687  | 0.7493570812282049 | 0.0576382876532237 | T | T | T |
| 0.1087799974606943  | 0.7488193510853903 | 0.0536773696978545 | T | T | T |
| 0.0615734336382361  | 0.2505041384972863 | 0.1377049687857873 | T | T | T |
| 0.3049518409403894  | 0.2468109425193908 | 0.1518655451944901 | T | T | T |
| 0.2280749205377576  | 0.2517815016745847 | 0.5558900332306241 | T | T | T |
| 0.3914883653341236  | 0.2508796630127376 | 0.5519109814609092 | T | T | T |
| 0.5615105579814834  | 0.2512098692886142 | 0.3609830379269838 | T | T | T |
| 0.8061949187557014  | 0.2460397622253111 | 0.3655704726572476 | T | T | T |
| 0.7273586305186285  | 0.2521947790248572 | 0.9548415443386973 | T | T | T |
| 0.8927000098413218  | 0.2493531601856968 | 0.9529763692320437 | T | T | T |
| 0.9369003142577043  | 0.7477141448651728 | 0.8662914034269781 | T | T | T |
| 0.6880174593979974  | 0.7587314397617742 | 0.8596972197378375 | T | T | T |
| 0.7763852281045903  | 0.7500684420148970 | 0.4851790758124656 | T | T | T |
| 0.6075967718673120  | 0.7491755367754785 | 0.4567702725169424 | T | T | T |
| 0.9594221004951194  | 0.4524145457431856 | 0.5636481893139118 | T | T | T |
| 0.8838239406159450  | 0.3875946794137209 | 0.5977245010919195 | T | T | T |
| 0.9162450392551276  | 0.3195153754632089 | 0.6242336636945821 | T | T | T |
| 0.9199956127504612  | 0.6109882336561006 | 0.3062619857297424 | T | T | T |
| 0.9491113522898941  | 0.5415765341601115 | 0.6483937830051588 | T | T | T |
| 0.9066792864575368  | 0.5389716271793246 | 0.5298131535092075 | T | T | T |
| -0.0036846600411845 | 0.5485555038465098 | 0.5342525814324884 | T | T | T |
| 0.0005266805036118  | 0.4396613246301482 | 0.5991072272506037 | T | T | T |
| 0.9524208545166385  | 0.5257994774309863 | 0.5699551638342719 | T | T | T |

**Figure S8(d)**

Si Al O Ga H C

1.0000000000000000

20.0219993591000005 0.0000000000000000 0.0000000000000000

0.0000000000000000 19.8990001678000006 0.0000000000000000

0.0000000000000000 0.0000000000000000 13.3830003737999998

93 3 193 1 6 1

Selective dynamics

Direct

|                    |                    |                    |   |   |   |
|--------------------|--------------------|--------------------|---|---|---|
| 0.4230721518083905 | 0.0577199150539027 | 0.6484945524408524 | T | T | T |
| 0.3019721394209428 | 0.0274364379381448 | 0.7892180741002869 | T | T | T |
| 0.2803645042063462 | 0.0612243306268431 | 0.0127305868921900 | T | T | T |
| 0.1206386586345372 | 0.0648182625072978 | 0.0138254331170983 | T | T | T |
| 0.0679890685461111 | 0.0308148241443360 | 0.8008334837751454 | T | T | T |
| 0.1769328575894716 | 0.0566290226172651 | 0.6514376743948620 | T | T | T |
| 0.4197268587873596 | 0.8274046393716641 | 0.6701831703487300 | T | T | T |
| 0.3025252538530502 | 0.8692060013002663 | 0.8098114695497258 | T | T | T |
| 0.2677285095428124 | 0.8293433767060048 | 0.0300169827759307 | T | T | T |
| 0.1127307963650902 | 0.8274759570152116 | 0.0167422279887505 | T | T | T |
| 0.0621570240874237 | 0.8718335324116319 | 0.8028703741460491 | T | T | T |
| 0.1797011125757284 | 0.8292576096723883 | 0.6741844525366101 | T | T | T |
| 0.0757393681425169 | 0.9435782573850006 | 0.1508633745750244 | T | T | T |
| 0.1966918005909424 | 0.9737043146385459 | 0.2934847200196355 | T | T | T |
| 0.2173627723694643 | 0.9379964230172551 | 0.5147404080061193 | T | T | T |
| 0.3767152760660687 | 0.9348341078047246 | 0.5160253954444416 | T | T | T |
| 0.4304536903765734 | 0.9703699808998100 | 0.3053973219666040 | T | T | T |
| 0.3211610775374902 | 0.9457346800358759 | 0.1554607039155385 | T | T | T |
| 0.0785421796561985 | 0.1732602680702184 | 0.1664366414499327 | T | T | T |

**Structure files (CONTCAR) involved in this work:**

|                    |                    |                    |   |   |   |
|--------------------|--------------------|--------------------|---|---|---|
| 0.1965060406660357 | 0.1308965320310185 | 0.3077499424906425 | T | T | T |
| 0.2317833262534751 | 0.1738993649761759 | 0.5252016281604892 | T | T | T |
| 0.3865305009739839 | 0.1745661715519141 | 0.5132683366549020 | T | T | T |
| 0.4371637453037435 | 0.1285565226868347 | 0.3029921884538773 | T | T | T |
| 0.3195097854408869 | 0.1678105040337091 | 0.1717041651999490 | T | T | T |
| 0.5809995605206347 | 0.5552761019016289 | 0.3523900097494134 | T | T | T |
| 0.6956556797078599 | 0.5274747779374669 | 0.1929880268008814 | T | T | T |
| 0.7137966477098625 | 0.5659299295633384 | 0.9800374317660221 | T | T | T |
| 0.8728845337016692 | 0.5639516914233763 | 0.9823381567798227 | T | T | T |
| 0.9345728682004115 | 0.5307101326879652 | 0.1894827027064008 | T | T | T |
| 0.5776042657055308 | 0.3296654254014915 | 0.3382979081765336 | T | T | T |
| 0.7047980313796682 | 0.3732630873427553 | 0.2107298217332673 | T | T | T |
| 0.7322719358567594 | 0.3276095903448814 | 0.9947277715074556 | T | T | T |
| 0.8845282337161114 | 0.3286370323319539 | 0.9915989692072750 | T | T | T |
| 0.9360567663929731 | 0.3732193788990492 | 0.2044194339955868 | T | T | T |
| 0.9266600825280039 | 0.4398345206675301 | 0.8540492910748171 | T | T | T |
| 0.7784612356611820 | 0.4372424499226199 | 0.4884187230376169 | T | T | T |
| 0.6179960819139287 | 0.4332449064848947 | 0.4955338581274854 | T | T | T |
| 0.5670588449298609 | 0.4684259213410330 | 0.7113943633978791 | T | T | T |
| 0.6706833196835719 | 0.4367761918450372 | 0.8607811205528818 | T | T | T |
| 0.9184385276958291 | 0.6735252417915675 | 0.8307971275863522 | T | T | T |
| 0.8007388609231761 | 0.6327725385991977 | 0.6982934928634358 | T | T | T |
| 0.7703316579833270 | 0.6692348916671552 | 0.4790093038434661 | T | T | T |
| 0.6144977552975345 | 0.6710204796231346 | 0.4864247362115739 | T | T | T |
| 0.5655747306546518 | 0.6269347638734517 | 0.7048150609935802 | T | T | T |
| 0.6819280326800318 | 0.6809351391067573 | 0.8267380038024367 | T | T | T |
| 0.5753240302141015 | 0.9433042516127517 | 0.3651005466519178 | T | T | T |
| 0.6946615362220945 | 0.9733000396232360 | 0.2215789738208779 | T | T | T |
| 0.7187102095457011 | 0.9421037934984814 | 0.9996072975615681 | T | T | T |
| 0.8785371105314895 | 0.9346529896543808 | 0.9955926892175492 | T | T | T |
| 0.9310319802243455 | 0.9699034433108816 | 0.2063908501251743 | T | T | T |
| 0.8203578044498990 | 0.9433932640108925 | 0.3562436249772919 | T | T | T |
| 0.5812861061323350 | 0.1746844105714313 | 0.3370452183513518 | T | T | T |
| 0.6975162662636027 | 0.1298309297010993 | 0.1999474957561832 | T | T | T |
| 0.7318559203281073 | 0.1722592393439770 | 0.9794552645499101 | T | T | T |
| 0.8859627861103299 | 0.1743549983038409 | 0.9957518402884283 | T | T | T |
| 0.9345634909453839 | 0.1278403700723194 | 0.2063876021234946 | T | T | T |
| 0.8186969585350728 | 0.1677628887155187 | 0.3379821830694325 | T | T | T |
| 0.9239689035651382 | 0.0587219072661346 | 0.8634749574458201 | T | T | T |
| 0.8046285935896454 | 0.0298305576561924 | 0.7232800013417187 | T | T | T |
| 0.7813080180730468 | 0.0599401293534679 | 0.4984211461177437 | T | T | T |
| 0.6215973846699797 | 0.0673026044964585 | 0.4953486145497868 | T | T | T |
| 0.5679794300689299 | 0.0320639200321431 | 0.7039449955441525 | T | T | T |
| 0.6777417106389410 | 0.0570947467455449 | 0.8556384813317433 | T | T | T |
| 0.9184727474734672 | 0.8262944951139680 | 0.8398064285351687 | T | T | T |
| 0.8029423748402160 | 0.8739350003614058 | 0.7047025454436393 | T | T | T |
| 0.7680977168526901 | 0.8306050525535560 | 0.4868751050966345 | T | T | T |
| 0.6131624079437662 | 0.8260719799359577 | 0.4977944624173942 | T | T | T |
| 0.5627517471640866 | 0.8750844495197140 | 0.7046473033986043 | T | T | T |
| 0.6786464857429130 | 0.8373566509728472 | 0.8379507003568833 | T | T | T |
| 0.4227036735466519 | 0.4461227473965200 | 0.6433132291153834 | T | T | T |
| 0.3032424957531599 | 0.4746821325862445 | 0.7905299910474499 | T | T | T |
| 0.2857622454009853 | 0.4337738370484011 | 0.0092907422694941 | T | T | T |

**Structure files (CONTCAR) involved in this work:**

|                    |                    |                    |   |   |   |
|--------------------|--------------------|--------------------|---|---|---|
| 0.1283298155930930 | 0.4326672182899550 | 0.0074568525944566 | T | T | T |
| 0.0747465758941253 | 0.4720399416145114 | 0.8011542433071560 | T | T | T |
| 0.1822321370607887 | 0.4505190287194692 | 0.6475067669232925 | T | T | T |
| 0.4237505384315733 | 0.6725247127747113 | 0.6628751636951984 | T | T | T |
| 0.3016830448859609 | 0.6311741918550778 | 0.8001973726632055 | T | T | T |
| 0.2698404853248574 | 0.6734491801243514 | 0.0182568812655858 | T | T | T |
| 0.1158292918472391 | 0.6744426819378824 | 0.0077069169358048 | T | T | T |
| 0.0654430422426468 | 0.6299276894904434 | 0.7987747530213533 | T | T | T |
| 0.1795020983482498 | 0.6705626978223291 | 0.6638237490464801 | T | T | T |
| 0.0798416622543049 | 0.5553132330181780 | 0.1365136269291199 | T | T | T |
| 0.2007924273741793 | 0.5291673430344002 | 0.2812005237941956 | T | T | T |
| 0.2214063941789945 | 0.5684063751328015 | 0.5035294252979130 | T | T | T |
| 0.3820681273980745 | 0.5689303546385397 | 0.5052265527496995 | T | T | T |
| 0.4341107921930571 | 0.5286499003916770 | 0.2951242202149641 | T | T | T |
| 0.3277122088101742 | 0.5538477412473323 | 0.1427325865773418 | T | T | T |
| 0.0809711265260772 | 0.3283799495649308 | 0.1592200289159112 | T | T | T |
| 0.1975878361242586 | 0.3707619979181143 | 0.3032965510270616 | T | T | T |
| 0.2329934386939356 | 0.3307878755037790 | 0.5228129330359340 | T | T | T |
| 0.3874944781313453 | 0.3281204543769650 | 0.5115122919732537 | T | T | T |
| 0.4356490608900567 | 0.3709012584026627 | 0.2965708748401028 | T | T | T |
| 0.3190375251933821 | 0.3260894609592765 | 0.1678370577259951 | T | T | T |
| 0.8110145932843927 | 0.5592589526263853 | 0.3353894347324973 | T | T | T |
| 0.8268784320714220 | 0.3288480471233780 | 0.3459347396247501 | T | T | T |
| 0.7971017031438092 | 0.4715068522950833 | 0.7298062533776190 | T | T | T |
| 0.3575926256519585 | 0.0632183396482458 | 0.7193965995484748 | T | T | T |
| 0.2997252728941657 | 0.0663699906872954 | 0.8955636021941822 | T | T | T |
| 0.2002560378082838 | 0.0527197213708991 | 0.0286655163812513 | T | T | T |
| 0.1018558363657508 | 0.0679541147478992 | 0.8964041062033632 | T | T | T |
| 0.1023639224864269 | 0.0582580831454864 | 0.6987703631992164 | T | T | T |
| 0.2289097649500328 | 0.0329011615685679 | 0.7376210595381893 | T | T | T |
| 0.3576875946227472 | 0.8265471041085740 | 0.7482665066308641 | T | T | T |
| 0.3049849147011356 | 0.8443355533747320 | 0.9248629861083703 | T | T | T |
| 0.1900071397745918 | 0.8529483809048243 | 0.0205539698499590 | T | T | T |
| 0.0847807934747123 | 0.8327268645643361 | 0.9037388393710842 | T | T | T |
| 0.1022423136197896 | 0.8395191889995782 | 0.7082401475429428 | T | T | T |
| 0.2283130563080571 | 0.8559140019830269 | 0.7635805632646091 | T | T | T |
| 0.3207801006569244 | 0.9486273641175174 | 0.8039572512509360 | T | T | T |
| 0.0810071257776264 | 0.9506551156930909 | 0.8127408615111572 | T | T | T |
| 0.4311255824244706 | 0.1272348289445465 | 0.5856497979621896 | T | T | T |
| 0.4171866563586364 | 0.9954993710976056 | 0.5700526498214635 | T | T | T |
| 0.3970734100495368 | 0.8636747184865329 | 0.5667522523443002 | T | T | T |
| 0.1943488414215895 | 0.1316986810083055 | 0.6120063602783663 | T | T | T |
| 0.1788461212257010 | 0.0035241964334174 | 0.5590817021033899 | T | T | T |
| 0.1937372655199775 | 0.8696793544047435 | 0.5709595056222411 | T | T | T |
| 0.9889506897180096 | 0.0474599577778520 | 0.7928108382028273 | T | T | T |
| 0.9822633458002252 | 0.8628524947254418 | 0.7864613341326814 | T | T | T |
| 0.1416470997061741 | 0.9396945270681361 | 0.2208610121783758 | T | T | T |
| 0.1985561896902314 | 0.9314095267220126 | 0.3972678417256816 | T | T | T |
| 0.2972184517749415 | 0.9485111886476867 | 0.5302859265110398 | T | T | T |
| 0.3959393211027721 | 0.9308677924525053 | 0.3986340827761479 | T | T | T |
| 0.3960528913707458 | 0.9463312235140627 | 0.2014150205317424 | T | T | T |
| 0.2698382068212292 | 0.9711961881502503 | 0.2416634734038501 | T | T | T |
| 0.1420395101644950 | 0.1711417494605396 | 0.2415782086959575 | T | T | T |



**Structure files (CONTCAR) involved in this work:**

|                    |                    |                    |   |   |   |
|--------------------|--------------------|--------------------|---|---|---|
| 0.1947742674596961 | 0.1634107236112133 | 0.4186691907752470 | T | T | T |
| 0.3090260609790487 | 0.1491922259686700 | 0.5165930702475663 | T | T | T |
| 0.4136974628262195 | 0.1720244774613687 | 0.3995353715472438 | T | T | T |
| 0.3968134593184067 | 0.1560038231193080 | 0.2052416686891042 | T | T | T |
| 0.2707537123598810 | 0.1391732138235418 | 0.2596768566139883 | T | T | T |
| 0.1770305015534677 | 0.0517645276619283 | 0.3142311669495966 | T | T | T |
| 0.4186126338479100 | 0.0503315777507669 | 0.3225202883477842 | T | T | T |
| 0.0677145992225351 | 0.8724376923116701 | 0.0919519272278928 | T | T | T |
| 0.0811771342655082 | 0.0036284075742289 | 0.0685486613779331 | T | T | T |
| 0.0981228441320750 | 0.1359795547798354 | 0.0624939922456049 | T | T | T |
| 0.3034234610255304 | 0.8698083069551994 | 0.1203018493451044 | T | T | T |
| 0.3175504148941884 | 0.9957160596633884 | 0.0594533506422670 | T | T | T |
| 0.3053288508345760 | 0.1296666558685434 | 0.0667872593610522 | T | T | T |
| 0.5092626137411252 | 0.9531755850123651 | 0.2963889119948136 | T | T | T |
| 0.5170070324820154 | 0.1372004137011287 | 0.2860382797006664 | T | T | T |
| 0.6449885923354081 | 0.5550239094449934 | 0.2794400400080567 | T | T | T |
| 0.6820758146251741 | 0.5709701426160283 | 0.0914493222480578 | T | T | T |
| 0.7938095471271950 | 0.5481589445412755 | 0.9857641419220825 | T | T | T |
| 0.9036923128497326 | 0.5699549073626077 | 0.0954795737976429 | T | T | T |
| 0.9014282889389313 | 0.5654316878545045 | 0.2949802225858521 | T | T | T |
| 0.7716723595929535 | 0.5397530864542440 | 0.2265622114470582 | T | T | T |
| 0.6439733589176507 | 0.3381506854724952 | 0.2724900883069534 | T | T | T |
| 0.7172601500438315 | 0.3254934915622684 | 0.1133738174228931 | T | T | T |
| 0.8083971547015262 | 0.3558189444414555 | 0.9749124084962129 | T | T | T |
| 0.9053251386525963 | 0.3339582288775211 | 0.1083041315779294 | T | T | T |
| 0.9091757655743069 | 0.3430970635152116 | 0.3072078059345786 | T | T | T |
| 0.7710311323126388 | 0.3772634701154629 | 0.2775674770049438 | T | T | T |
| 0.6808698975481240 | 0.4478088386611848 | 0.1729957486696144 | T | T | T |
| 0.9151785053783008 | 0.4531323162088758 | 0.1935367337312590 | T | T | T |
| 0.5719580533249879 | 0.6286120895848449 | 0.4043451358764195 | T | T | T |
| 0.5891173238943201 | 0.5004590905255017 | 0.4420064183776888 | T | T | T |
| 0.5846465904750352 | 0.3670251698124531 | 0.4459960418623417 | T | T | T |
| 0.8059945770403468 | 0.6398841189320584 | 0.3808883926416212 | T | T | T |
| 0.8087989968840257 | 0.4977855518596093 | 0.4248232116423460 | T | T | T |
| 0.8204569782953699 | 0.3662843353476904 | 0.4682228753488316 | T | T | T |
| 0.0134341933750618 | 0.5455490927149730 | 0.2055843760933183 | T | T | T |
| 0.0178072771974610 | 0.3711781712449384 | 0.2003772224697315 | T | T | T |
| 0.8705104561583012 | 0.4301975091652928 | 0.7693263407989921 | T | T | T |
| 0.8054898589306699 | 0.4458557277783790 | 0.6039707847442601 | T | T | T |
| 0.6985576473105068 | 0.4300886659051065 | 0.4818176648682151 | T | T | T |
| 0.5985789068526477 | 0.4334109266314629 | 0.6124986889295848 | T | T | T |
| 0.5960851949679534 | 0.4328168665263018 | 0.8110425639035961 | T | T | T |
| 0.7266798552134137 | 0.4345366208318342 | 0.7757444974720031 | T | T | T |
| 0.8631221329029157 | 0.6764074292126897 | 0.7433324052968960 | T | T | T |
| 0.8071649026324245 | 0.6381070615234005 | 0.5774449358783305 | T | T | T |
| 0.6918064594401806 | 0.6465602846162420 | 0.4834782317368318 | T | T | T |
| 0.5844257646184192 | 0.6590824926177614 | 0.5973113696927189 | T | T | T |
| 0.6048545028449783 | 0.6657234336749989 | 0.7941604295917148 | T | T | T |
| 0.7299486439980938 | 0.6677950862260847 | 0.7304773194851258 | T | T | T |
| 0.8048331648965724 | 0.5573517082429105 | 0.7396661110449247 | T | T | T |
| 0.5855108213558453 | 0.5480358163868417 | 0.7083656179877188 | T | T | T |
| 0.9355175230517982 | 0.3733515253268048 | 0.9236385869802231 | T | T | T |
| 0.9130081976384119 | 0.5038143296247231 | 0.9266964450033712 | T | T | T |

**Structure files (CONTCAR) involved in this work:**

|                    |                    |                    |   |   |   |
|--------------------|--------------------|--------------------|---|---|---|
| 0.8896238381028017 | 0.6348644779570158 | 0.9286704513569948 | T | T | T |
| 0.6780724562285220 | 0.3739878147282063 | 0.9379914645113765 | T | T | T |
| 0.6742531886395652 | 0.5074660953636815 | 0.9215773884234643 | T | T | T |
| 0.7043489496760095 | 0.6370763874308977 | 0.9229507044926394 | T | T | T |
| 0.4863251255308630 | 0.4592415962611285 | 0.7143317673479046 | T | T | T |
| 0.4851759922593801 | 0.6360591938861341 | 0.7211589226922848 | T | T | T |
| 0.6402609177375881 | 0.9370725018089626 | 0.2933613369443231 | T | T | T |
| 0.6963656970332177 | 0.9342768641784590 | 0.1152186922026200 | T | T | T |
| 0.7992073004930975 | 0.9502131378677388 | 0.9884999730057915 | T | T | T |
| 0.9015733043977819 | 0.9284958248457127 | 0.1113415508030479 | T | T | T |
| 0.8950519411880671 | 0.9451173723959170 | 0.3086202222186614 | T | T | T |
| 0.7685055587772096 | 0.9686866887881996 | 0.2708665598551512 | T | T | T |
| 0.6430627896079957 | 0.1748920099656714 | 0.2593174100330684 | T | T | T |
| 0.6965565581284522 | 0.1549378689508842 | 0.0850867896634402 | T | T | T |
| 0.8095375785453365 | 0.1474182931767013 | 0.9850572049650379 | T | T | T |
| 0.9095469605664248 | 0.1722299773869581 | 0.1115524088960204 | T | T | T |
| 0.8966142047506586 | 0.1522584364399770 | 0.3067639742299375 | T | T | T |
| 0.7714327211343411 | 0.1369941014057354 | 0.2485457618314527 | T | T | T |
| 0.6740475169277047 | 0.0514775700697430 | 0.2059919183188448 | T | T | T |
| 0.9183991627121130 | 0.0491486925351484 | 0.1849123406913891 | T | T | T |
| 0.5666544367463011 | 0.8742687984174236 | 0.4288358026599609 | T | T | T |
| 0.5808928650892574 | 0.0062331208479491 | 0.4422542559448543 | T | T | T |
| 0.6030828579422256 | 0.1374553936971467 | 0.4402071554810749 | T | T | T |
| 0.8034275259141043 | 0.8670062155279991 | 0.3915878806657196 | T | T | T |
| 0.8171972989243500 | 0.9934681072454349 | 0.4520519315056415 | T | T | T |
| 0.8044150776562446 | 0.1276739563525519 | 0.4422158720882158 | T | T | T |
| 0.0104732414255067 | 0.9550685704677041 | 0.2202522943925699 | T | T | T |
| 0.0149960695961450 | 0.1377638612762282 | 0.2204724290278680 | T | T | T |
| 0.8583338762985914 | 0.0683863251353023 | 0.7937190644296118 | T | T | T |
| 0.8036995218016907 | 0.0656472914952696 | 0.6146999794072188 | T | T | T |
| 0.7007588502111955 | 0.0508335896122472 | 0.4881061605352693 | T | T | T |
| 0.5991071035094566 | 0.0748730752348203 | 0.6114683140266365 | T | T | T |
| 0.6031084489481635 | 0.0530228256460299 | 0.8086453107075042 | T | T | T |
| 0.7300087123646046 | 0.0332947244493633 | 0.7699014884237495 | T | T | T |
| 0.8554634506802181 | 0.8265705412631208 | 0.7639948452816729 | T | T | T |
| 0.8055248655424503 | 0.8550692236774711 | 0.5877357953421949 | T | T | T |
| 0.6898618961824345 | 0.8528843666672802 | 0.4921113096327024 | T | T | T |
| 0.5871597394100362 | 0.8276877905894372 | 0.6127806515432215 | T | T | T |
| 0.6015964908008851 | 0.8526332909812420 | 0.8058817323985165 | T | T | T |
| 0.7277647489806378 | 0.8631923918657438 | 0.7483045569726517 | T | T | T |
| 0.8268737612647290 | 0.9514324686759978 | 0.7177977770370004 | T | T | T |
| 0.5798302194832945 | 0.9529242808186006 | 0.6789664843172404 | T | T | T |
| 0.9346015742340926 | 0.1269644680915286 | 0.9285255173548772 | T | T | T |
| 0.9180834126848765 | 0.9951047143220170 | 0.9393277148316566 | T | T | T |
| 0.8978452649223103 | 0.8635896769397879 | 0.9432367374553505 | T | T | T |
| 0.6933315171063718 | 0.1335744041173717 | 0.8895846645423455 | T | T | T |
| 0.6828342860013185 | 0.0082826676734690 | 0.9527991640381590 | T | T | T |
| 0.6950775407526063 | 0.8749873175812904 | 0.9419653666141125 | T | T | T |
| 0.4887501451184116 | 0.0476320114975198 | 0.7174351819613868 | T | T | T |
| 0.4826339884908732 | 0.8661786922779694 | 0.7213810281527846 | T | T | T |
| 0.3560737202257454 | 0.4435177989547353 | 0.7123556439428165 | T | T | T |
| 0.3022436729850222 | 0.4288014212928539 | 0.8907332499227317 | T | T | T |
| 0.2065791353488896 | 0.4489528441124725 | 0.0271970664965102 | T | T | T |

**Structure files (CONTCAR) involved in this work:**

|                    |                    |                    |   |   |   |
|--------------------|--------------------|--------------------|---|---|---|
| 0.1132079605704798 | 0.4305857701384823 | 0.8881019104966408 | T | T | T |
| 0.1049080775748634 | 0.4504468459985465 | 0.6905340870847809 | T | T | T |
| 0.2294558964518096 | 0.4730012616988600 | 0.7390238225406121 | T | T | T |
| 0.3569126546414670 | 0.6664814181100941 | 0.7304487754122068 | T | T | T |
| 0.3012720911321851 | 0.6696642147465350 | 0.9066834790924606 | T | T | T |
| 0.1925252170976258 | 0.6475461071067486 | 0.0145158771441949 | T | T | T |
| 0.0917197472368875 | 0.6748581201175494 | 0.8919898865760307 | T | T | T |
| 0.1022406553938172 | 0.6557663707784668 | 0.6969767974231678 | T | T | T |
| 0.2284707603448398 | 0.6369301135919090 | 0.7474532067490468 | T | T | T |
| 0.3200108346246723 | 0.5523277427434010 | 0.8179777118395870 | T | T | T |
| 0.0856236230781334 | 0.5516969964809788 | 0.8190410860421938 | T | T | T |
| 0.4314727289636690 | 0.3748779840453167 | 0.5855974457475297 | T | T | T |
| 0.4165862597427839 | 0.5049350973544948 | 0.5595859846178908 | T | T | T |
| 0.4096210962782172 | 0.6379498582161931 | 0.5546431028731428 | T | T | T |
| 0.1959869104894612 | 0.3746181163113774 | 0.6094660096155082 | T | T | T |
| 0.1859981876691950 | 0.5023173980674431 | 0.5539513125398173 | T | T | T |
| 0.1924621513801653 | 0.6362726530245372 | 0.5550326611734900 | T | T | T |
| 0.9968353991776546 | 0.4523848216900097 | 0.7941011314038435 | T | T | T |
| 0.9851096945828101 | 0.6357493083166863 | 0.7869076682558195 | T | T | T |
| 0.1439319239099281 | 0.5617975312234846 | 0.2095413726256754 | T | T | T |
| 0.2012212740688832 | 0.5702271364932437 | 0.3862066700354872 | T | T | T |
| 0.3013863860308575 | 0.5630097260252341 | 0.5197524266761480 | T | T | T |
| 0.4012169452673293 | 0.5698245216146265 | 0.3880135795152663 | T | T | T |
| 0.4014510309751756 | 0.5571269040641985 | 0.1922164358166772 | T | T | T |
| 0.2732872940937247 | 0.5349042219164569 | 0.2288958111475980 | T | T | T |
| 0.1399447717873518 | 0.3315951628338389 | 0.2423858833797525 | T | T | T |
| 0.1940373148146020 | 0.3439916335300692 | 0.4179080064362566 | T | T | T |
| 0.3101177341334945 | 0.3549469622414496 | 0.5128630730267415 | T | T | T |
| 0.4145516476955468 | 0.3311389381492638 | 0.3978680158861820 | T | T | T |
| 0.3957450925691957 | 0.3387921369639018 | 0.2019109773240967 | T | T | T |
| 0.2705125873263297 | 0.3566343254313209 | 0.2550287378368590 | T | T | T |
| 0.1820150415299621 | 0.4510140765536095 | 0.3026252602836854 | T | T | T |
| 0.4155583005927764 | 0.4495647945778847 | 0.3089336425222429 | T | T | T |
| 0.0694212289705242 | 0.6240759683499176 | 0.0733811974024770 | T | T | T |
| 0.0848333832540069 | 0.4922381848516136 | 0.0597562271049549 | T | T | T |
| 0.1077411051643713 | 0.3605194528983141 | 0.0543633842176422 | T | T | T |
| 0.3114095948342189 | 0.6266207500981852 | 0.0947115865155766 | T | T | T |
| 0.3274934641883758 | 0.4958148463282124 | 0.0570954436063824 | T | T | T |
| 0.3050612605726452 | 0.3628166807231334 | 0.0612882484524677 | T | T | T |
| 0.5139905072954015 | 0.5390524746555789 | 0.2882443356292873 | T | T | T |
| 0.5149156946272202 | 0.3621723420702899 | 0.2766213746360276 | T | T | T |
| 0.4405217090666895 | 0.7508941442927277 | 0.6433242968786786 | T | T | T |
| 0.1936637662766076 | 0.7501513823934401 | 0.6532446236300004 | T | T | T |
| 0.2730281418582817 | 0.7501658004300722 | 0.0578136919067820 | T | T | T |
| 0.1086143744158164 | 0.7495244083609169 | 0.0529149587841855 | T | T | T |
| 0.0609347551936148 | 0.2508494312514892 | 0.1394666411712428 | T | T | T |
| 0.3044740845921947 | 0.2468836201531374 | 0.1534322768560433 | T | T | T |
| 0.2274438048536473 | 0.2528619536747962 | 0.5555738616439532 | T | T | T |
| 0.3911014657756307 | 0.2515982913378170 | 0.5525539872949033 | T | T | T |
| 0.5615671596750943 | 0.2515293967804647 | 0.3629345222774448 | T | T | T |
| 0.8055443986562040 | 0.2456426217101740 | 0.3543763044580961 | T | T | T |
| 0.7274842215605472 | 0.2512776330559395 | 0.9525095330804589 | T | T | T |
| 0.8915296590214785 | 0.2510654169778126 | 0.9555276260430295 | T | T | T |

**Structure files (CONTCAR) involved in this work:**

|                    |                    |                    |   |   |   |
|--------------------|--------------------|--------------------|---|---|---|
| 0.9384170381261088 | 0.7490869812171860 | 0.8655780173421422 | T | T | T |
| 0.6888844923549877 | 0.7585590922428506 | 0.8600763602029083 | T | T | T |
| 0.7753938550817526 | 0.7505006811319002 | 0.4769022751927984 | T | T | T |
| 0.6079705630338584 | 0.7497797745490838 | 0.4567537382796235 | T | T | T |
| 0.0221607258356861 | 0.3923914474116306 | 0.5497487024916796 | T | T | T |
| 0.8840658626005781 | 0.3795864952368613 | 0.5928436371501398 | T | T | T |
| 0.0494709932949824 | 0.3874183859350864 | 0.4891951707752270 | T | T | T |
| 0.9180943177560756 | 0.6100945013133071 | 0.3124070587354295 | T | T | T |
| 0.9479651324792731 | 0.4932311766267595 | 0.6203402244791951 | T | T | T |
| 0.9187405558045747 | 0.4786776828887488 | 0.4881833120573723 | T | T | T |
| 1.0064276312236813 | 0.5009219575082096 | 0.5143003769177432 | T | T | T |
| 0.0531939153126138 | 0.4081932430388295 | 0.6036487149916807 | T | T | T |
| 0.9594504120693895 | 0.4811054849255177 | 0.5426678177943731 | T | T | T |

**Figure S8(e)**

Si Al O Ga H C

1.0000000000000000

20.0219993591000005 0.0000000000000000 0.0000000000000000

0.0000000000000000 19.8990001678000006 0.0000000000000000

0.0000000000000000 0.0000000000000000 13.3830003737999998

93 3 193 1 6 1

## Selective dynamics

## Direct

|                    |                    |                    |   |   |   |
|--------------------|--------------------|--------------------|---|---|---|
| 0.4214705704472578 | 0.0565745517387330 | 0.6484629932742849 | T | T | T |
| 0.3006974400486662 | 0.0263951883657881 | 0.7899685783837530 | T | T | T |
| 0.2794192723609217 | 0.0597839562767958 | 0.0133935752210039 | T | T | T |
| 0.1196202586972165 | 0.0626045815463030 | 0.0128414574908832 | T | T | T |
| 0.0663275903535539 | 0.0285101338447469 | 0.7996793455418638 | T | T | T |
| 0.1759056342371125 | 0.0549787436110563 | 0.6518778719232424 | T | T | T |
| 0.4197214752188134 | 0.8267906900070903 | 0.6714020274930259 | T | T | T |
| 0.3015730130757859 | 0.8678390122404818 | 0.8100925736336038 | T | T | T |
| 0.2668316799910405 | 0.8277812056582120 | 0.0303518757854609 | T | T | T |
| 0.1118264653640229 | 0.8260633120987814 | 0.0185723157958982 | T | T | T |
| 0.0607143654666594 | 0.8688880877198029 | 0.8034949878922211 | T | T | T |
| 0.1788580653770602 | 0.8264632503691359 | 0.6745816907862552 | T | T | T |
| 0.0752309540083800 | 0.9424611194381736 | 0.1515837241383285 | T | T | T |
| 0.1962198504980059 | 0.9721774451302907 | 0.2944928503835239 | T | T | T |
| 0.2163399530464845 | 0.9354883379201824 | 0.5153036268417783 | T | T | T |
| 0.3760316994592759 | 0.9328808902013754 | 0.5161823089419587 | T | T | T |
| 0.4299926775451974 | 0.9682030178023723 | 0.3053378648912506 | T | T | T |
| 0.3204554199616671 | 0.9439803277717430 | 0.1564432839610681 | T | T | T |
| 0.0781892985501219 | 0.1717230223908565 | 0.1650880786385634 | T | T | T |
| 0.1957195040048780 | 0.1295781881986638 | 0.3080741344431421 | T | T | T |
| 0.2304929615668648 | 0.1725027043690762 | 0.5251807698397636 | T | T | T |
| 0.3854100304715194 | 0.1733725931938544 | 0.5128205369593288 | T | T | T |
| 0.4360154287119810 | 0.1264111403259031 | 0.3025888378955540 | T | T | T |
| 0.3184148088611496 | 0.1668517146400441 | 0.1721084520578847 | T | T | T |
| 0.5816300024162030 | 0.5557999136370599 | 0.3474980099553907 | T | T | T |
| 0.6927331009984489 | 0.5304477270939828 | 0.1862281638567869 | T | T | T |
| 0.7110157244698310 | 0.5629327168470600 | 0.9714950279599666 | T | T | T |
| 0.8691236511641671 | 0.5554257349453593 | 0.9707054925865348 | T | T | T |
| 0.9342545186815502 | 0.5259514398465039 | 0.1835704142960698 | T | T | T |
| 0.5756128282912049 | 0.3277220823986790 | 0.3323490192996786 | T | T | T |
| 0.7058141671463948 | 0.3728458704821078 | 0.2162325752430027 | T | T | T |

**Structure files (CONTCAR) involved in this work:**

|                    |                    |                    |   |   |   |
|--------------------|--------------------|--------------------|---|---|---|
| 0.7339654816590979 | 0.3284428772116447 | 0.9950640717697782 | T | T | T |
| 0.8858296248891632 | 0.3276380351379036 | 0.9779863750657859 | T | T | T |
| 0.9364400832669940 | 0.3702130150832598 | 0.1980248661730388 | T | T | T |
| 0.9243012002445895 | 0.4350280939587590 | 0.8299134207007436 | T | T | T |
| 0.7774663419322848 | 0.4408895479432583 | 0.4748547207302110 | T | T | T |
| 0.6196125020561233 | 0.4308889857359780 | 0.4889249585190502 | T | T | T |
| 0.5673189387723365 | 0.4651866930302582 | 0.7066150050878645 | T | T | T |
| 0.6738417665467361 | 0.4324445650796834 | 0.8514169936415287 | T | T | T |
| 0.9174296897975732 | 0.6702455160452360 | 0.8287740597486771 | T | T | T |
| 0.7986722394136725 | 0.6306219890878827 | 0.6989077377858042 | T | T | T |
| 0.7693520199096366 | 0.6667173417079133 | 0.4806847445031325 | T | T | T |
| 0.6131773332370257 | 0.6693015141561239 | 0.4857607268261435 | T | T | T |
| 0.5649733694350727 | 0.6238532692701129 | 0.7042548915643736 | T | T | T |
| 0.6804872415475939 | 0.6806465030011644 | 0.8258504077470418 | T | T | T |
| 0.5750045208739778 | 0.9425151123517663 | 0.3651954334114960 | T | T | T |
| 0.6952789019221477 | 0.9719450417626939 | 0.2221136673936913 | T | T | T |
| 0.7174897062680546 | 0.9425787124598506 | 0.9984845075325031 | T | T | T |
| 0.8777744938614048 | 0.9332620398507960 | 0.9962743610566014 | T | T | T |
| 0.9309480817527735 | 0.9690089355157590 | 0.2083004947430435 | T | T | T |
| 0.8201611633927900 | 0.9362083094873629 | 0.3541644929462980 | T | T | T |
| 0.5800872114944705 | 0.1732976309149893 | 0.3345966344386076 | T | T | T |
| 0.6990195588227391 | 0.1312242642106239 | 0.2017576437035070 | T | T | T |
| 0.7312079440163507 | 0.1713077934169087 | 0.9797801624255210 | T | T | T |
| 0.8858134270296829 | 0.1724761793195614 | 0.9950832203934032 | T | T | T |
| 0.9337204233851524 | 0.1277847382474649 | 0.2076826165683750 | T | T | T |
| 0.8198708132045155 | 0.1693905786818481 | 0.3433059595617844 | T | T | T |
| 0.9228478119339216 | 0.0570192125801233 | 0.8623375677713215 | T | T | T |
| 0.8046096002571126 | 0.0286647561492989 | 0.7221736538578487 | T | T | T |
| 0.7807149943316933 | 0.0543901195286954 | 0.4964737907390320 | T | T | T |
| 0.6207032343533239 | 0.0668432225966301 | 0.4947363593759351 | T | T | T |
| 0.5665424371327261 | 0.0326710902595210 | 0.7028142689286994 | T | T | T |
| 0.6775713108756607 | 0.0584902894186374 | 0.8516232648055846 | T | T | T |
| 0.9163203052067872 | 0.8232198666547750 | 0.8415731839572766 | T | T | T |
| 0.8017629703417971 | 0.8727230184582730 | 0.7067570570960766 | T | T | T |
| 0.7685062280450260 | 0.8280199368601657 | 0.4898115029915446 | T | T | T |
| 0.6130650708129505 | 0.8249856758511009 | 0.4983915741544436 | T | T | T |
| 0.5623076839304372 | 0.8759590951529380 | 0.7045002009839223 | T | T | T |
| 0.6768798824125216 | 0.8370609907266989 | 0.8386305090286933 | T | T | T |
| 0.4232759230922286 | 0.4446287954959803 | 0.6405507776348313 | T | T | T |
| 0.3049392495199262 | 0.4721673828147490 | 0.7890404510865913 | T | T | T |
| 0.2844214716031672 | 0.4330422164864051 | 0.0068519520487183 | T | T | T |
| 0.1267807452178241 | 0.4315152932630951 | 0.0049007189924039 | T | T | T |
| 0.0740201934969755 | 0.4720762542117476 | 0.7982297794573091 | T | T | T |
| 0.1825363810298782 | 0.4485726658352659 | 0.6478072919107762 | T | T | T |
| 0.4239045703600200 | 0.6718514008491313 | 0.6639017015369461 | T | T | T |
| 0.3025990833794878 | 0.6289417684706038 | 0.8008304469693878 | T | T | T |
| 0.2692950728029253 | 0.6713938667506548 | 0.0190991928794706 | T | T | T |
| 0.1151053403811959 | 0.6732285133623317 | 0.0083457496131526 | T | T | T |
| 0.0654530847997182 | 0.6287948384751834 | 0.8000704406374156 | T | T | T |
| 0.1800891132895937 | 0.6678294293894558 | 0.6646267131393211 | T | T | T |
| 0.0790520836076281 | 0.5534747285059123 | 0.1364138552263779 | T | T | T |
| 0.1994172943095941 | 0.5267106819320884 | 0.2818546709343074 | T | T | T |
| 0.2225375538564307 | 0.5659154741073592 | 0.5031710670632076 | T | T | T |

**Structure files (CONTCAR) involved in this work:**

|                    |                    |                    |   |   |   |
|--------------------|--------------------|--------------------|---|---|---|
| 0.3833224028615749 | 0.5695408232962256 | 0.5052579541288978 | T | T | T |
| 0.4339275683101630 | 0.5271725748761437 | 0.2956333994158045 | T | T | T |
| 0.3263216287040703 | 0.5515926574667365 | 0.1437842161310358 | T | T | T |
| 0.0816878886223023 | 0.3265918947930737 | 0.1589064545252343 | T | T | T |
| 0.1960219717385773 | 0.3686944767554168 | 0.3050206591652118 | T | T | T |
| 0.2316319862684291 | 0.3291167991679806 | 0.5243047046578655 | T | T | T |
| 0.3860758395250897 | 0.3267877140159753 | 0.5085000140537664 | T | T | T |
| 0.4332428552987801 | 0.3697713886543970 | 0.2942865664215392 | T | T | T |
| 0.3162782240616356 | 0.3256418804320340 | 0.1672281574673145 | T | T | T |
| 0.8075474159667059 | 0.5658249059797109 | 0.3211887768641866 | T | T | T |
| 0.8298669575271675 | 0.3267974074803971 | 0.3538180991073757 | T | T | T |
| 0.7941873116889444 | 0.4722666487916494 | 0.7187841837717600 | T | T | T |
| 0.3559088900998660 | 0.0619217775985073 | 0.7192008874074566 | T | T | T |
| 0.2998037418023352 | 0.0650560434379039 | 0.8965668005773981 | T | T | T |
| 0.1992385636031127 | 0.0502734551888151 | 0.0270713249830762 | T | T | T |
| 0.1001535960230654 | 0.0652626347689221 | 0.8955774980224175 | T | T | T |
| 0.1009582492476871 | 0.0565768634045029 | 0.6980941706664225 | T | T | T |
| 0.2272692434827064 | 0.0326414989754360 | 0.7396467754482855 | T | T | T |
| 0.3576489026112071 | 0.8258863023897837 | 0.7493227618589687 | T | T | T |
| 0.3039388570367276 | 0.8433222449802447 | 0.9252614204323834 | T | T | T |
| 0.1891168906616138 | 0.8515273115666694 | 0.0215549714714264 | T | T | T |
| 0.0834839727372905 | 0.8319025169939681 | 0.9058877759350329 | T | T | T |
| 0.1014959569647950 | 0.8360139458444795 | 0.7099473622451824 | T | T | T |
| 0.2277158530532714 | 0.8535253760597946 | 0.7634323959680609 | T | T | T |
| 0.3188573773404828 | 0.9474318386033925 | 0.8039057554826392 | T | T | T |
| 0.0782883465416469 | 0.9481881289696166 | 0.8103301885895410 | T | T | T |
| 0.4296011377180280 | 0.1261506701702642 | 0.5859529014013799 | T | T | T |
| 0.4155758117831563 | 0.9942835355269911 | 0.5700733668654636 | T | T | T |
| 0.3967646366276288 | 0.8618831793854623 | 0.5671893226666289 | T | T | T |
| 0.1928447115328359 | 0.1299433949652652 | 0.6115930328070870 | T | T | T |
| 0.1787437999603061 | 0.0012981717569753 | 0.5604958129962415 | T | T | T |
| 0.1920975432205541 | 0.8674155795685906 | 0.5715105849903156 | T | T | T |
| 0.9874888336462103 | 0.0459895263978869 | 0.7909606302649137 | T | T | T |
| 0.9808955848828641 | 0.8581817712308007 | 0.7878388552484312 | T | T | T |
| 0.1415621024899019 | 0.9389386331082222 | 0.2205683033687334 | T | T | T |
| 0.1969295548310978 | 0.9294430683764603 | 0.3979584295812264 | T | T | T |
| 0.2963263732437653 | 0.9454180091593383 | 0.5297579304112787 | T | T | T |
| 0.3958939480506611 | 0.9288529665942138 | 0.3990491566541257 | T | T | T |
| 0.3955976560900985 | 0.9438009020804341 | 0.2015673652845292 | T | T | T |
| 0.2696871933437087 | 0.9690963480081928 | 0.2436578467441748 | T | T | T |
| 0.1414261305874523 | 0.1689016823451943 | 0.2405491907033489 | T | T | T |
| 0.1932953259396753 | 0.1624384462816447 | 0.4187459972659564 | T | T | T |
| 0.3078255934278091 | 0.1481533203641822 | 0.5161859138952257 | T | T | T |
| 0.4128578658541024 | 0.1697533566838774 | 0.3993172577727550 | T | T | T |
| 0.3957859094417471 | 0.1542844455890295 | 0.2049511574756323 | T | T | T |
| 0.2701398971155132 | 0.1384257585363608 | 0.2608378562767460 | T | T | T |
| 0.1770060237796887 | 0.0502899531392945 | 0.3154910806420281 | T | T | T |
| 0.4176477970578722 | 0.0481323049602685 | 0.3218399410224360 | T | T | T |
| 0.0668947796556311 | 0.8707387256941006 | 0.0944185057397278 | T | T | T |
| 0.0801555019443480 | 0.0015083006995958 | 0.0676702369002653 | T | T | T |
| 0.0975127403438396 | 0.1338456308259425 | 0.0614214968949748 | T | T | T |
| 0.3024348373864176 | 0.8682443784184311 | 0.1207341900235539 | T | T | T |
| 0.3166928842156052 | 0.9947458000048377 | 0.0613575658596571 | T | T | T |

**Structure files (CONTCAR) involved in this work:**

|                    |                    |                    |   |   |   |
|--------------------|--------------------|--------------------|---|---|---|
| 0.3030843547223341 | 0.1286018331063210 | 0.0675922253925237 | T | T | T |
| 0.5089172438386079 | 0.9514427583049930 | 0.2962428384077549 | T | T | T |
| 0.5159060025648413 | 0.1346463670262814 | 0.2855637492781414 | T | T | T |
| 0.6423236682134230 | 0.5626487381829345 | 0.2691779102561541 | T | T | T |
| 0.6718983706434920 | 0.5609079047310794 | 0.0774707364435646 | T | T | T |
| 0.7902112398830589 | 0.5465482490418357 | 0.9884719400320180 | T | T | T |
| 0.9091417069711746 | 0.5523234013864469 | 0.0769886593878832 | T | T | T |
| 0.8968147609488831 | 0.5696557399689067 | 0.2777552615555023 | T | T | T |
| 0.7680983557765179 | 0.5533517907185852 | 0.2097822273900284 | T | T | T |
| 0.6408836040165451 | 0.3347696028647431 | 0.2632264251938791 | T | T | T |
| 0.7253047978581163 | 0.3315184245413373 | 0.1149323353572533 | T | T | T |
| 0.8092816644860481 | 0.3539420527599950 | 0.9651025883209542 | T | T | T |
| 0.9121188262608894 | 0.3420678962334606 | 0.0898506442783845 | T | T | T |
| 0.9058573545824300 | 0.3314703135911563 | 0.2913901797197411 | T | T | T |
| 0.7671610747642685 | 0.3718316220030185 | 0.2933606368544928 | T | T | T |
| 0.6836752486205182 | 0.4490170171762268 | 0.1860134557814226 | T | T | T |
| 0.9139278947216237 | 0.4497952261354961 | 0.2046092444037732 | T | T | T |
| 0.5696612961173068 | 0.6270549653395354 | 0.4045037309937004 | T | T | T |
| 0.5984161494784457 | 0.4994344955071165 | 0.4319947680666544 | T | T | T |
| 0.5838251332024591 | 0.3665363562562739 | 0.4385784257053929 | T | T | T |
| 0.8063578145502712 | 0.6422481650347177 | 0.3807464530435211 | T | T | T |
| 0.7964641121744863 | 0.4988349528029149 | 0.3993513684975664 | T | T | T |
| 0.8317441314209855 | 0.3761308451079935 | 0.4707882027732428 | T | T | T |
| 0.0119314860405112 | 0.5436642454615306 | 0.2042951650688372 | T | T | T |
| 0.0180881569897270 | 0.3693007596813972 | 0.1988424795644227 | T | T | T |
| 0.8740421434735371 | 0.4264655777746098 | 0.7313612082670433 | T | T | T |
| 0.8048912105655582 | 0.4662702052057766 | 0.5870144670650128 | T | T | T |
| 0.7002006103185771 | 0.4203644751824098 | 0.4837907375819382 | T | T | T |
| 0.5967948487152592 | 0.4337858064499384 | 0.6040818537207123 | T | T | T |
| 0.5998395219625063 | 0.4260253674254830 | 0.8009916006633315 | T | T | T |
| 0.7317175111219449 | 0.4246505938523220 | 0.7682916291806882 | T | T | T |
| 0.8631369881594617 | 0.6728988057867091 | 0.7395411948867199 | T | T | T |
| 0.8035855713620348 | 0.6305328383489663 | 0.5776642614069055 | T | T | T |
| 0.6904841061891988 | 0.6449891203554554 | 0.4793816410876660 | T | T | T |
| 0.5844451740942468 | 0.6558102282972991 | 0.5969684818906068 | T | T | T |
| 0.6040351246584795 | 0.6632442545085176 | 0.7930957346725868 | T | T | T |
| 0.7295837718727285 | 0.6692917566986432 | 0.7301068061615460 | T | T | T |
| 0.7997309719225634 | 0.5562214025943181 | 0.7467505826089949 | T | T | T |
| 0.5851385049579448 | 0.5449733774837718 | 0.7086678000696625 | T | T | T |
| 0.9312102460819310 | 0.3667610076845207 | 0.8946134881204166 | T | T | T |
| 0.8949916718658186 | 0.4941015404464199 | 0.9001866919803805 | T | T | T |
| 0.8888357529945603 | 0.6273186383819798 | 0.9228465235059471 | T | T | T |
| 0.6799075374969160 | 0.3753838887683081 | 0.9382385707529863 | T | T | T |
| 0.6776928690316797 | 0.5073371687958924 | 0.8995047752901654 | T | T | T |
| 0.7037144727667132 | 0.6366760350832269 | 0.9215331078259016 | T | T | T |
| 0.4870178906390488 | 0.4547427250607659 | 0.7128928038207986 | T | T | T |
| 0.4846716818568189 | 0.6329680616668910 | 0.7204729873194148 | T | T | T |
| 0.6401113115249236 | 0.9369850800645404 | 0.2938079506331815 | T | T | T |
| 0.6907115250607352 | 0.9380651935382329 | 0.1123045088838650 | T | T | T |
| 0.7983632201579441 | 0.9489267578957477 | 0.9932296611077005 | T | T | T |
| 0.9032116873912174 | 0.9287799405123827 | 0.1109861084643097 | T | T | T |
| 0.8954933007670413 | 0.9406953645329997 | 0.3091564892980155 | T | T | T |
| 0.7697457854197060 | 0.9582723349416684 | 0.2650262525206772 | T | T | T |

**Structure files (CONTCAR) involved in this work:**

|                    |                    |                    |   |   |   |
|--------------------|--------------------|--------------------|---|---|---|
| 0.6406465098339493 | 0.1747074618952421 | 0.2548491704644585 | T | T | T |
| 0.6967295457986904 | 0.1497329787705852 | 0.0842091783777416 | T | T | T |
| 0.8090663228592380 | 0.1470811351265825 | 0.9831074006286956 | T | T | T |
| 0.9084456536403390 | 0.1705172642079885 | 0.1111465250846373 | T | T | T |
| 0.8971083022665688 | 0.1559422369005676 | 0.3069260196378075 | T | T | T |
| 0.7716698948809796 | 0.1482972450951454 | 0.2487819013630800 | T | T | T |
| 0.6814076354681892 | 0.0520830208431771 | 0.2173413561953525 | T | T | T |
| 0.9162833710363562 | 0.0485762781899029 | 0.1917432368842110 | T | T | T |
| 0.5670724766299539 | 0.8734873331866736 | 0.4291581917347699 | T | T | T |
| 0.5798939711050236 | 0.0057490258336541 | 0.4418318485838043 | T | T | T |
| 0.6042541969580393 | 0.1365995059661422 | 0.4370321082797277 | T | T | T |
| 0.8050623150748366 | 0.8597735162408014 | 0.3916556922881285 | T | T | T |
| 0.8122452329409414 | 0.9862439765081685 | 0.4490984675287927 | T | T | T |
| 0.8054535813169417 | 0.1199281031576014 | 0.4373646072402463 | T | T | T |
| 0.0106254067739748 | 0.9554667488938869 | 0.2217868568373605 | T | T | T |
| 0.0143733586407918 | 0.1366849364563046 | 0.2190582968127214 | T | T | T |
| 0.8573617719103889 | 0.0684456885111624 | 0.7927880022726769 | T | T | T |
| 0.8073416744922824 | 0.0598305264941539 | 0.6107430695708670 | T | T | T |
| 0.6997076504405748 | 0.0492584516694331 | 0.4918806504984561 | T | T | T |
| 0.5960621800991256 | 0.0759433510297693 | 0.6096480698218388 | T | T | T |
| 0.6023746606555908 | 0.0545763622277874 | 0.8066116589126525 | T | T | T |
| 0.7289218567047231 | 0.0364368966167077 | 0.7635374732401099 | T | T | T |
| 0.8536474117421341 | 0.8239962602651913 | 0.7648985029633508 | T | T | T |
| 0.8050451660353933 | 0.8572531202199283 | 0.5887019871510160 | T | T | T |
| 0.6901919273791010 | 0.8504282159246387 | 0.4909641255280836 | T | T | T |
| 0.5875477187213182 | 0.8280752088964616 | 0.6136373715899917 | T | T | T |
| 0.6002369953990424 | 0.8542502751820598 | 0.8068877636440902 | T | T | T |
| 0.7261784956199672 | 0.8612339998221455 | 0.7482463663457930 | T | T | T |
| 0.8255370227864938 | 0.9497818902601398 | 0.7252596205783154 | T | T | T |
| 0.5796322767683760 | 0.9536384891906474 | 0.6780453131907639 | T | T | T |
| 0.9343826411362296 | 0.1242437172108731 | 0.9291984073929741 | T | T | T |
| 0.9163576484193100 | 0.9928717297435899 | 0.9367625375086267 | T | T | T |
| 0.8960448453323296 | 0.8617437135514637 | 0.9442871349102742 | T | T | T |
| 0.6928930488743453 | 0.1346820181441857 | 0.8877659486056576 | T | T | T |
| 0.6842727451959268 | 0.0083152724459857 | 0.9467365463726156 | T | T | T |
| 0.6947415939402954 | 0.8745232750962892 | 0.9422960971889996 | T | T | T |
| 0.4871284892169370 | 0.0466485668902779 | 0.7176193236941927 | T | T | T |
| 0.4821800939097642 | 0.8671980369164012 | 0.7209537541627186 | T | T | T |
| 0.3570356562740275 | 0.4406356111878074 | 0.7098680703083128 | T | T | T |
| 0.3058011096956736 | 0.4269900152651736 | 0.8901508100378150 | T | T | T |
| 0.2051242140332716 | 0.4506643562223707 | 0.0168217995154983 | T | T | T |
| 0.1062076769813381 | 0.4273185099004549 | 0.8875395377796168 | T | T | T |
| 0.1067726656195789 | 0.4537944630051953 | 0.6905000103740150 | T | T | T |
| 0.2309511333551528 | 0.4695582308082899 | 0.7394868325681750 | T | T | T |
| 0.3571802346854518 | 0.6660395704345035 | 0.7317253885992170 | T | T | T |
| 0.3021474643779397 | 0.6659723838332057 | 0.9085838899928143 | T | T | T |
| 0.1917929780367247 | 0.6462968507924393 | 0.0140497903779950 | T | T | T |
| 0.0905427716859099 | 0.6749335859380701 | 0.8928725753700819 | T | T | T |
| 0.1030743349641365 | 0.6532938815391968 | 0.6985032676999369 | T | T | T |
| 0.2292063519608073 | 0.6350516415548588 | 0.7488244512967610 | T | T | T |
| 0.3220997734933053 | 0.5500937143706378 | 0.8151220752587200 | T | T | T |
| 0.0843333428015276 | 0.5509514964986549 | 0.8249878352473872 | T | T | T |
| 0.4315985822103802 | 0.3750691014359746 | 0.5782830762760314 | T | T | T |



**Structure files (CONTCAR) involved in this work:**

|                    |                    |                    |   |   |   |
|--------------------|--------------------|--------------------|---|---|---|
| 0.4183736720739099 | 0.5063597169250191 | 0.5613725498071642 | T | T | T |
| 0.4096407128155519 | 0.6391855409269015 | 0.5544335978833487 | T | T | T |
| 0.1944597002253320 | 0.3712218803901013 | 0.6127577254085901 | T | T | T |
| 0.1910853136403029 | 0.4979652738334612 | 0.5523510850097985 | T | T | T |
| 0.1925618180402248 | 0.6327496055227915 | 0.5564665992097007 | T | T | T |
| 0.9955625288242809 | 0.4554927122509928 | 0.7833725010069034 | T | T | T |
| 0.9854396229763787 | 0.6356893315350860 | 0.7850667223369631 | T | T | T |
| 0.1428062829823189 | 0.5599131355993200 | 0.2100277882858829 | T | T | T |
| 0.2010542692244241 | 0.5682157492696002 | 0.3863137133127169 | T | T | T |
| 0.3028094933880816 | 0.5633835994436683 | 0.5176481689327851 | T | T | T |
| 0.4033630320227115 | 0.5700516092416394 | 0.3883725268094719 | T | T | T |
| 0.4002396663181109 | 0.5547659842601405 | 0.1929782146791945 | T | T | T |
| 0.2720308139026865 | 0.5315072251121582 | 0.2293540842035879 | T | T | T |
| 0.1394614662326193 | 0.3282565403781640 | 0.2436489737616360 | T | T | T |
| 0.1934725955189610 | 0.3421513815336534 | 0.4193153328974830 | T | T | T |
| 0.3088400177632929 | 0.3532647789397486 | 0.5140924790985514 | T | T | T |
| 0.4110695440624986 | 0.3280762488708612 | 0.3934743075490169 | T | T | T |
| 0.3932749934172466 | 0.3409014741779897 | 0.1975214506650216 | T | T | T |
| 0.2691755039817842 | 0.3548990185243827 | 0.2567166933223717 | T | T | T |
| 0.1799258544485232 | 0.4487496432630910 | 0.3022469158360357 | T | T | T |
| 0.4149449871203269 | 0.4484460986397095 | 0.3121620998870311 | T | T | T |
| 0.0688680894136982 | 0.6224658271772485 | 0.0736246785638385 | T | T | T |
| 0.0837017349816972 | 0.4903315114039613 | 0.0598793701270552 | T | T | T |
| 0.1102515565369828 | 0.3593720536253898 | 0.0554668525047899 | T | T | T |
| 0.3096280524830117 | 0.6248910766937144 | 0.0975691471619563 | T | T | T |
| 0.3261280332016571 | 0.4942985314687027 | 0.0571356193596901 | T | T | T |
| 0.2991989691215842 | 0.3617833700965379 | 0.0612872647800376 | T | T | T |
| 0.5139574991854192 | 0.5361580330286363 | 0.2873479423126603 | T | T | T |
| 0.5121840602733376 | 0.3598889011621501 | 0.2724105538136527 | T | T | T |
| 0.4420359619154385 | 0.7502830478120609 | 0.6471243175925429 | T | T | T |
| 0.1936917808403207 | 0.7476139866902309 | 0.6530566178973610 | T | T | T |
| 0.2724864913388702 | 0.7485156775581918 | 0.0572041998640503 | T | T | T |
| 0.1079514197974378 | 0.7481057359467082 | 0.0546183230528736 | T | T | T |
| 0.0612702122670575 | 0.2492619338759035 | 0.1369845775729391 | T | T | T |
| 0.3039786784388033 | 0.2459365494124179 | 0.1535278608808591 | T | T | T |
| 0.2261332058915101 | 0.2510317453479904 | 0.5571986763558825 | T | T | T |
| 0.3907512190986104 | 0.2506029449088246 | 0.5511019140363035 | T | T | T |
| 0.5596283429918431 | 0.2500317888079908 | 0.3601189993752267 | T | T | T |
| 0.8084634862304806 | 0.2449241511445063 | 0.3789202623281596 | T | T | T |
| 0.7252470993836418 | 0.2511012144503584 | 0.9591058851147899 | T | T | T |
| 0.8926423108132893 | 0.2484709082964871 | 0.9529375367199370 | T | T | T |
| 0.9337780127219676 | 0.7455559569735987 | 0.8688374556712679 | T | T | T |
| 0.6850600020128461 | 0.7580386750712003 | 0.8607610546435094 | T | T | T |
| 0.7755453022533014 | 0.7476348202539576 | 0.4898418206818071 | T | T | T |
| 0.6061137140256379 | 0.7484542643980820 | 0.4587156201019734 | T | T | T |
| 0.0463770370149285 | 0.2966423733005992 | 0.6239060882952726 | T | T | T |
| 0.8906940127967637 | 0.4195008234281516 | 0.5805193290109948 | T | T | T |
| 0.0430525320174038 | 0.2493459463862703 | 0.6416553185321423 | T | T | T |
| 0.9204693323850641 | 0.6093050366745739 | 0.3019247744191781 | T | T | T |
| 1.0064219219921575 | 0.4700534302087450 | 0.5828457217086176 | T | T | T |
| 0.9693007521351620 | 0.4702790628611439 | 0.4591061004919584 | T | T | T |
| 0.0050287489447477 | 0.3940567494722430 | 0.5100912148253794 | T | T | T |
| 0.0930526559492467 | 0.3081437041083304 | 0.6360421181464291 | T | T | T |

**Structure files (CONTCAR) involved in this work:**

0.9787525955579919 0.4409895653130460 0.5272001029881679 T T T

**Figure S10 Zn-IS**

Si Al O Zn H C

1.0000000000000000

20.0219999999999985 0.0000000000000000 0.0000000000000000

0.0000000000000000 19.8990000000000009 0.0000000000000000

0.0000000000000000 0.0000000000000000 13.3829999999999991

93 3 194 2 9 2

Selective dynamics

Direct

0.4234991897022539 0.0583938196313458 0.6481323394826523 T T T

0.3070361241286315 0.0281466516205854 0.7939389107775693 T T T

0.2828354971289225 0.0563283037072397 0.0163627094989635 T T T

0.1240204909623361 0.0604100460243812 0.0114087842124727 T T T

0.0687557576119014 0.0308837539171770 0.7999741573508842 T T T

0.1825696011344304 0.0590904369014516 0.6635832913323981 T T T

0.4194061352478943 0.8257775849163974 0.6672171861233097 T T T

0.3055696908975749 0.8694082552323568 0.8081336444656820 T T T

0.2670799845112292 0.8293696501705490 0.0248917365180913 T T T

0.1125643099812695 0.8259313812356632 0.0100413018913911 T T T

0.0659341972582264 0.8736342828205580 0.7967037673654155 T T T

0.1841210376318038 0.8277956574305914 0.6724187618692640 T T T

0.0784535700864085 0.9393032896915383 0.1489444310253276 T T T

0.1956037775397707 0.9694265870008041 0.2949870692707362 T T T

0.2195455225162820 0.9395092709086422 0.5163733256886149 T T T

0.3789273267986230 0.9348448513644281 0.5126027571863347 T T T

0.4348548176360147 0.9670429217604695 0.3006148433835419 T T T

0.3204655478051889 0.9381702305599190 0.1647323567487717 T T T

0.0836549278416738 0.1700619622576513 0.1664516418856391 T T T

0.1966912779421235 0.1284944040247452 0.3096749747661429 T T T

0.2348539410563804 0.1700749796122170 0.5255577416191620 T T T

0.3898051735705890 0.1730150317060387 0.5080941178130822 T T T

0.4366541041420021 0.1254239965953709 0.2946364517918593 T T T

0.3166017288974912 0.1693440261283720 0.1713164677026984 T T T

0.5762870376391972 0.5537462368000077 0.3513889714570674 T T T

0.6893007094512456 0.5255900268036855 0.1954684876810721 T T T

0.7120480865890292 0.5694796981798751 0.9805893690591448 T T T

0.8705493012204938 0.5729559724402477 0.9810760005616650 T T T

0.8079281352627598 0.5482023906631690 0.3404728807413056 T T T

0.5729784468777505 0.327788332282698 0.3288449922033452 T T T

0.6943629145944896 0.3715927347832840 0.1906406497781618 T T T

0.7304999984624672 0.3263355371889008 0.9803640426244180 T T T

0.8852189239308234 0.3258395042915971 0.9978110435441910 T T T

0.9446109447986152 0.3756536994914809 0.1917391382133189 T T T

0.9181483857681533 0.4439883871224400 0.8601207828519822 T T T

0.7997485620620038 0.4716225295083322 0.7180828861014473 T T T

0.7712550425283941 0.4349655729059233 0.4942197827561655 T T T

0.6131765687355671 0.4270234027799916 0.4896806131483934 T T T

0.5654236347486168 0.4679858221195766 0.7043935031391173 T T T

0.6749913785907250 0.4467882216068866 0.8541411702465134 T T T

0.9196951384251274 0.6775316399087465 0.8250466594241480 T T T

0.7698671142502884 0.6668187388253294 0.4616239934679354 T T T

0.6137909612827646 0.6712410550923374 0.4830976898872645 T T T

**Structure files (CONTCAR) involved in this work:**

|                    |                    |                    |   |   |   |
|--------------------|--------------------|--------------------|---|---|---|
| 0.5604840455478115 | 0.6264759450059734 | 0.6959303368739936 | T | T | T |
| 0.6725715296142746 | 0.6749963383721688 | 0.8217434621363445 | T | T | T |
| 0.5796223423082280 | 0.9440308462990469 | 0.3540848951865274 | T | T | T |
| 0.6992425498237798 | 0.9729348291057767 | 0.2090253881501157 | T | T | T |
| 0.7217918724252094 | 0.9375325197151897 | 0.9877593120276054 | T | T | T |
| 0.8824753876585445 | 0.9334734086525485 | 0.9918103672605304 | T | T | T |
| 0.9342743890461739 | 0.9677866426176371 | 0.2021723583727137 | T | T | T |
| 0.8225774306884179 | 0.9448295835110044 | 0.3482813949214144 | T | T | T |
| 0.5790749097372161 | 0.1724881764684341 | 0.3239642492826829 | T | T | T |
| 0.6990367527881914 | 0.1319315641206101 | 0.1875939128894805 | T | T | T |
| 0.7331585639365439 | 0.1708393050206221 | 0.9672612507455352 | T | T | T |
| 0.8877843208797922 | 0.1731922419795472 | 0.9830488659362560 | T | T | T |
| 0.9376771462581740 | 0.1253875139527947 | 0.1950924225401018 | T | T | T |
| 0.8217672514532387 | 0.1733594222533282 | 0.3240714588110651 | T | T | T |
| 0.9238500618036449 | 0.0552278037110325 | 0.8531941845835491 | T | T | T |
| 0.8050136958643402 | 0.0268162131981328 | 0.7026071448672659 | T | T | T |
| 0.7816293907531401 | 0.0661707379697265 | 0.4858986096960705 | T | T | T |
| 0.6210846154134763 | 0.0690552427763888 | 0.4867294023200283 | T | T | T |
| 0.5681910444639258 | 0.0316462165501002 | 0.6956278424373641 | T | T | T |
| 0.6817926648088485 | 0.0538277459130504 | 0.8411431227601551 | T | T | T |
| 0.9241494493267255 | 0.8297849525426993 | 0.8315479492784326 | T | T | T |
| 0.8041565511936002 | 0.8696435102298912 | 0.6903537706575638 | T | T | T |
| 0.7710890720194821 | 0.8247856042061389 | 0.4742014376660304 | T | T | T |
| 0.6154024544711708 | 0.8250574065037815 | 0.4866826515039983 | T | T | T |
| 0.5642773429345487 | 0.8746716147255480 | 0.6939912973160983 | T | T | T |
| 0.6801779485560107 | 0.8339089474318501 | 0.8264151895422457 | T | T | T |
| 0.4214863390877003 | 0.4416229779939770 | 0.6475278086355867 | T | T | T |
| 0.3042450172926192 | 0.4691898056791826 | 0.7921662476601367 | T | T | T |
| 0.2787000197524704 | 0.4400782478951955 | 0.0148420588070399 | T | T | T |
| 0.1203411412086243 | 0.4356935748782624 | 0.0159101507420312 | T | T | T |
| 0.0628167538779349 | 0.4675124267027823 | 0.8025747262781021 | T | T | T |
| 0.1775345038027715 | 0.4399123010289812 | 0.6645071210610157 | T | T | T |
| 0.4159201624350210 | 0.6723985017936501 | 0.6618185272586018 | T | T | T |
| 0.3029707593333436 | 0.6278152381416635 | 0.8038398875663817 | T | T | T |
| 0.2671763224691542 | 0.6693287769499295 | 0.0210139867857729 | T | T | T |
| 0.1133228734871763 | 0.6718552095255685 | 0.0037590376805490 | T | T | T |
| 0.0619628170571522 | 0.6265507603074317 | 0.7923359655986216 | T | T | T |
| 0.1816934739011529 | 0.6693522603075194 | 0.6684573093358049 | T | T | T |
| 0.0760925865971332 | 0.5590449527426709 | 0.1475121035484716 | T | T | T |
| 0.1930546779997772 | 0.5266620197059613 | 0.2923324260070987 | T | T | T |
| 0.2154000300357834 | 0.5578048877420286 | 0.5166251840096875 | T | T | T |
| 0.3742700635354519 | 0.5636040260349601 | 0.5122343158262099 | T | T | T |
| 0.4291605476083566 | 0.5284510419500160 | 0.3004441299084600 | T | T | T |
| 0.3185139914552508 | 0.5584935495118110 | 0.1603306401625386 | T | T | T |
| 0.0866050924374007 | 0.3220712530150869 | 0.1641069353377090 | T | T | T |
| 0.1984013040577740 | 0.3680761364468702 | 0.3049618614085109 | T | T | T |
| 0.2343762205226921 | 0.3296951481944218 | 0.5248146426724148 | T | T | T |
| 0.3888886967901878 | 0.3272210664134556 | 0.5068098274273487 | T | T | T |
| 0.4325518057971927 | 0.3712688818661160 | 0.2906221769820920 | T | T | T |
| 0.3156488758188912 | 0.3272400839719198 | 0.1669197959017162 | T | T | T |
| 0.9208624101352880 | 0.5288691165871038 | 0.1882649454158952 | T | T | T |
| 0.8230267401970768 | 0.3371896151464583 | 0.3241393451239753 | T | T | T |
| 0.7986905310601731 | 0.6340981172252417 | 0.6918550393871916 | T | T | T |

**Structure files (CONTCAR) involved in this work:**

|                    |                    |                    |   |   |   |
|--------------------|--------------------|--------------------|---|---|---|
| 0.3585120577885303 | 0.0665066822250549 | 0.7198120381230118 | T | T | T |
| 0.3158891498351011 | 0.0582566098385050 | 0.9057323955654791 | T | T | T |
| 0.2030700977289513 | 0.0430108670886232 | 0.0079484773697649 | T | T | T |
| 0.0940861660862094 | 0.0693036121723073 | 0.9000381433019671 | T | T | T |
| 0.1059339663654451 | 0.0622413344993659 | 0.7027561143725503 | T | T | T |
| 0.2304904464319273 | 0.0398924572525697 | 0.7576078961214588 | T | T | T |
| 0.3616085143638311 | 0.8246023342170720 | 0.7522765592627833 | T | T | T |
| 0.3080697019584671 | 0.8521894006580059 | 0.9261987780059434 | T | T | T |
| 0.1894365164086328 | 0.8524394379113737 | 0.0132153085557956 | T | T | T |
| 0.0843135277998596 | 0.8319851958228857 | 0.8973780340487215 | T | T | T |
| 0.1064531903497830 | 0.8413344327639178 | 0.7026335570103865 | T | T | T |
| 0.2313908853075199 | 0.8515503443781377 | 0.7652234043318539 | T | T | T |
| 0.3231373422221169 | 0.9481094263022645 | 0.7902939155952465 | T | T | T |
| 0.0875156210220453 | 0.9515969131380536 | 0.8108530489895382 | T | T | T |
| 0.4333411198250395 | 0.1266829402113104 | 0.5833277694633237 | T | T | T |
| 0.4156176993784700 | 0.9951637089850562 | 0.5724057797257051 | T | T | T |
| 0.3919539791450327 | 0.8635952289732313 | 0.5678866690000172 | T | T | T |
| 0.2030486444747141 | 0.1325328923194020 | 0.6215878533699388 | T | T | T |
| 0.1879693483683100 | 0.0026427288082245 | 0.5765004462931996 | T | T | T |
| 0.2028498996103751 | 0.8688316872768593 | 0.5714839627999604 | T | T | T |
| 0.9891652400977957 | 0.0412155479038379 | 0.7842839859755898 | T | T | T |
| 0.9861527978263499 | 0.8682752894033120 | 0.7760566308254995 | T | T | T |
| 0.1440303287667953 | 0.9323340535624136 | 0.2195130358757023 | T | T | T |
| 0.1864868279936800 | 0.9373552026487201 | 0.4055865718082682 | T | T | T |
| 0.2995064877047312 | 0.9503227286253121 | 0.5080762888898800 | T | T | T |
| 0.4096549875379288 | 0.9293143239231469 | 0.4013041811350523 | T | T | T |
| 0.3967828509616682 | 0.9348334397605487 | 0.2047448490628833 | T | T | T |
| 0.2719397975872748 | 0.9576086011245100 | 0.2580038677692043 | T | T | T |
| 0.1404834493273934 | 0.1721632484675608 | 0.2525218558304580 | T | T | T |
| 0.1934001350415022 | 0.1480554425678079 | 0.4267884280067309 | T | T | T |
| 0.3123660655638187 | 0.1479675002922104 | 0.5109807964146286 | T | T | T |
| 0.4178657524809058 | 0.1670857165792579 | 0.3950937169084426 | T | T | T |
| 0.3944844816291955 | 0.1564576579023091 | 0.2010389124199833 | T | T | T |
| 0.2706267646006437 | 0.1456710745639337 | 0.2657146652006401 | T | T | T |
| 0.1795182457522356 | 0.0493673045810344 | 0.2947609423547130 | T | T | T |
| 0.4174762918459726 | 0.0467387265549722 | 0.3095652758444441 | T | T | T |
| 0.0679944217169645 | 0.8692332817887836 | 0.0881526660190093 | T | T | T |
| 0.0854543065191557 | 0.9997790454012835 | 0.0683777978259709 | T | T | T |
| 0.1118800483613921 | 0.1304770220179809 | 0.0695308933143399 | T | T | T |
| 0.2998868066164659 | 0.8647825768941144 | 0.1219913544483896 | T | T | T |
| 0.3159536150758347 | 0.9945361463807103 | 0.0775546261623315 | T | T | T |
| 0.2972183671392693 | 0.1274345683359689 | 0.0714014424931529 | T | T | T |
| 0.5141743587736007 | 0.9547300028994389 | 0.2842075957628790 | T | T | T |
| 0.5162875865079214 | 0.1326291681356820 | 0.2729906893434172 | T | T | T |
| 0.6365520026009771 | 0.5591465085137785 | 0.2720095194664920 | T | T | T |
| 0.6960795420261923 | 0.5744116166899701 | 0.0993071387302403 | T | T | T |
| 0.7913395334242226 | 0.5610742688375955 | 0.9567772343128391 | T | T | T |
| 0.8836209836023432 | 0.5779335361419805 | 0.0992615897849911 | T | T | T |
| 0.8836305811860907 | 0.5284877856285131 | 0.3078192089114072 | T | T | T |
| 0.7611598420368203 | 0.5232784642379806 | 0.2509898721157465 | T | T | T |
| 0.6412753109832833 | 0.3369366559441583 | 0.2669967280040335 | T | T | T |
| 0.6898108985934247 | 0.3308559836835404 | 0.0848974344297670 | T | T | T |
| 0.8076153768046427 | 0.3500822023422658 | 0.9975644884965641 | T | T | T |

**Structure files (CONTCAR) involved in this work:**

|                    |                    |                    |   |   |   |
|--------------------|--------------------|--------------------|---|---|---|
| 0.9124612333757374 | 0.3218339980739804 | 0.1130282451009849 | T | T | T |
| 0.9067267771722834 | 0.3698817178146929 | 0.3014119153844078 | T | T | T |
| 0.7680530108803945 | 0.3692452665484926 | 0.2371129204514940 | T | T | T |
| 0.6695360402981264 | 0.4488539440543013 | 0.1677533329050451 | T | T | T |
| 0.9372467144158997 | 0.4494863044948680 | 0.1470104219985497 | T | T | T |
| 0.5691424072570139 | 0.6253220996864548 | 0.4084628594436037 | T | T | T |
| 0.5891270428532601 | 0.4955900491327823 | 0.4345291472609334 | T | T | T |
| 0.5781047684073745 | 0.3620158230176702 | 0.4393124105137062 | T | T | T |
| 0.8002445389932576 | 0.6282843136183525 | 0.3637875233506243 | T | T | T |
| 0.7871632244076245 | 0.5112494864565356 | 0.4478823585627418 | T | T | T |
| 0.8199120209657702 | 0.3830774966633480 | 0.4375895529066801 | T | T | T |
| 0.0057934007094037 | 0.5612905728484188 | 0.2162459992441440 | T | T | T |
| 0.0225626447486539 | 0.3580878788751408 | 0.2145576420742267 | T | T | T |
| 0.8534094136743259 | 0.4325786185650048 | 0.7878269823246309 | T | T | T |
| 0.7918205745495172 | 0.4337135788383897 | 0.6110762882923276 | T | T | T |
| 0.6934645379672032 | 0.4186580118909586 | 0.4769333823129995 | T | T | T |
| 0.5936659097609550 | 0.4288328984551308 | 0.6065901498127262 | T | T | T |
| 0.6016958073645791 | 0.4390984584112785 | 0.8037527462556719 | T | T | T |
| 0.7269709943042137 | 0.4734864564904323 | 0.7694388000446321 | T | T | T |
| 0.8595743455125470 | 0.6813453335414981 | 0.7471126093352554 | T | T | T |
| 0.8135837524941384 | 0.6412519797124980 | 0.5588080180138576 | T | T | T |
| 0.6918381061885951 | 0.6470714430399807 | 0.4793323776481181 | T | T | T |
| 0.5852382150665523 | 0.6645242663789932 | 0.5953215938306082 | T | T | T |
| 0.5939595223783102 | 0.6632903638703261 | 0.7919065540332912 | T | T | T |
| 0.7187835412120055 | 0.6469330818472044 | 0.7323615084598172 | T | T | T |
| 0.8255821764184021 | 0.5481121805070041 | 0.6941841572505791 | T | T | T |
| 0.5810174492107555 | 0.5475825544331554 | 0.6908886765766430 | T | T | T |
| 0.9284738753260097 | 0.3779649188516340 | 0.9303715345706027 | T | T | T |
| 0.9105824177573648 | 0.5102681963659050 | 0.9293362786023138 | T | T | T |
| 0.8977468702886124 | 0.6416423202670274 | 0.9292465006642583 | T | T | T |
| 0.6969779551716703 | 0.3740162205511993 | 0.8961690517743380 | T | T | T |
| 0.6721592061682912 | 0.5031293079940600 | 0.9413839926934192 | T | T | T |
| 0.6854377281452277 | 0.6374718910355237 | 0.9281264382096401 | T | T | T |
| 0.4860517895643158 | 0.4534393135751738 | 0.7182781967378949 | T | T | T |
| 0.4796256042523887 | 0.6315192522610599 | 0.7054698287783753 | T | T | T |
| 0.6451623682792131 | 0.9391123070607660 | 0.2836626932348866 | T | T | T |
| 0.6967464384319040 | 0.9338914142202576 | 0.1028047039879954 | T | T | T |
| 0.8025344126273651 | 0.9438358694646191 | 0.9816856301251077 | T | T | T |
| 0.9042236976728505 | 0.9257916604330141 | 0.1080947889949740 | T | T | T |
| 0.8985584566004732 | 0.9452011345291625 | 0.3056676565115087 | T | T | T |
| 0.7733760713404818 | 0.9641687462033435 | 0.2562339387214005 | T | T | T |
| 0.6416945667717975 | 0.1727944854268288 | 0.2476810652860471 | T | T | T |
| 0.6952792078672591 | 0.1552461411274767 | 0.0717979688970290 | T | T | T |
| 0.8107775446899115 | 0.1471353597389139 | 0.9778530167150666 | T | T | T |
| 0.9154599243424588 | 0.1665936908149507 | 0.0961754187701021 | T | T | T |
| 0.8980373064167272 | 0.1521081870859431 | 0.2926290148842829 | T | T | T |
| 0.7722609688056137 | 0.1475024853191562 | 0.2339872944299177 | T | T | T |
| 0.6825566991260804 | 0.0520525900960167 | 0.1952059363193119 | T | T | T |
| 0.9217063976874682 | 0.0463932598081814 | 0.1778635368188721 | T | T | T |
| 0.5714885812249535 | 0.8740762090782991 | 0.4157187834881894 | T | T | T |
| 0.5842059343406046 | 0.0057594829776519 | 0.4332754046396951 | T | T | T |
| 0.6004465161169181 | 0.1379061150018843 | 0.4294216855089782 | T | T | T |
| 0.8078839022052302 | 0.8695314698239724 | 0.3895519219730102 | T | T | T |

**Structure files (CONTCAR) involved in this work:**

|                    |                    |                    |   |   |   |
|--------------------|--------------------|--------------------|---|---|---|
| 0.8155002568751918 | 0.9991700807525236 | 0.4377316554584829 | T | T | T |
| 0.8029766835839530 | 0.1336650507112875 | 0.4271371291365708 | T | T | T |
| 0.0133001882791215 | 0.9518594456905544 | 0.2181678090975790 | T | T | T |
| 0.0175530670372292 | 0.1346593153735423 | 0.2126618795213083 | T | T | T |
| 0.8585841718447237 | 0.0561527344708837 | 0.7819495265760368 | T | T | T |
| 0.8071424604919908 | 0.0716616007689670 | 0.6011606397553969 | T | T | T |
| 0.7010091215414820 | 0.0568440465463697 | 0.4816505980163786 | T | T | T |
| 0.5965578297276084 | 0.0755263069335855 | 0.6020110259724778 | T | T | T |
| 0.6059187167086465 | 0.0513313030422355 | 0.7987421116787495 | T | T | T |
| 0.7307147758180734 | 0.0304629267289545 | 0.7507234661761319 | T | T | T |
| 0.8593394379102299 | 0.8339226220416959 | 0.7600388471310028 | T | T | T |
| 0.8072525568300922 | 0.8333906989113848 | 0.5818487552453990 | T | T | T |
| 0.6934684803497155 | 0.8480635805879893 | 0.4825135502082536 | T | T | T |
| 0.5889751840419223 | 0.8282472162895580 | 0.6011410295135858 | T | T | T |
| 0.6039563584457872 | 0.8533141185690379 | 0.7949343306027716 | T | T | T |
| 0.7301157192738530 | 0.8609414441170394 | 0.7385888350354600 | T | T | T |
| 0.8218432893530977 | 0.9488090343933936 | 0.6770261587315884 | T | T | T |
| 0.5791426430494295 | 0.9528341532803232 | 0.6676204248780117 | T | T | T |
| 0.9324155268331813 | 0.1280046566553673 | 0.9069831096176599 | T | T | T |
| 0.9189027244430547 | 0.9976724844031526 | 0.9396064784587933 | T | T | T |
| 0.9067032380331391 | 0.8647561097459372 | 0.9379775730937049 | T | T | T |
| 0.6982620553214007 | 0.1299285493749409 | 0.8764408564269780 | T | T | T |
| 0.6889316289568900 | 0.0035956505228479 | 0.9361092086988573 | T | T | T |
| 0.6981489015290179 | 0.8692992870534034 | 0.9322400731591074 | T | T | T |
| 0.4895952585016882 | 0.0471234446442869 | 0.7157987876673029 | T | T | T |
| 0.4847776053580826 | 0.8634238192586650 | 0.7123116826165700 | T | T | T |
| 0.3557601404370457 | 0.4311901859387992 | 0.7174707616434188 | T | T | T |
| 0.3102863237631717 | 0.4374456064835380 | 0.9034010691628823 | T | T | T |
| 0.1988726941252868 | 0.4563269294994285 | 0.0124799464083724 | T | T | T |
| 0.0893428804330172 | 0.4331707949358476 | 0.9051487461954910 | T | T | T |
| 0.1021741206760195 | 0.4344651679888404 | 0.7083371515450865 | T | T | T |
| 0.2277335107251270 | 0.4587434366869430 | 0.7556187110251504 | T | T | T |
| 0.3570395889282263 | 0.6730359497584659 | 0.7449405419369212 | T | T | T |
| 0.3069082385932735 | 0.6488144427175460 | 0.9203760234792764 | T | T | T |
| 0.1898622982756713 | 0.6450947632454948 | 0.0090351396732550 | T | T | T |
| 0.0855722776669931 | 0.6681904461810014 | 0.8909389562793352 | T | T | T |
| 0.1037224674622752 | 0.6555337267034591 | 0.6967858967757914 | T | T | T |
| 0.2282155765473728 | 0.6418178798858249 | 0.7599927568939445 | T | T | T |
| 0.3219525079993568 | 0.5489366374534479 | 0.7916140028245249 | T | T | T |
| 0.0789349031206922 | 0.5475549767740321 | 0.8081007680322023 | T | T | T |
| 0.4334422417514044 | 0.3751956444393991 | 0.5788037616042343 | T | T | T |
| 0.4140931287718865 | 0.5062684816674683 | 0.5741142179447322 | T | T | T |
| 0.3873605283014416 | 0.6370964531698809 | 0.5608062167962927 | T | T | T |
| 0.1983687345563406 | 0.3680591576432812 | 0.6168610103163279 | T | T | T |
| 0.1798801612284082 | 0.4987407682336827 | 0.5805005092109899 | T | T | T |
| 0.1994209345629973 | 0.6310259752338775 | 0.5644619691819228 | T | T | T |
| 0.9837505783894028 | 0.4528372052736179 | 0.7891586797688267 | T | T | T |
| 0.9828080049878047 | 0.6369918868757073 | 0.7738193313106878 | T | T | T |
| 0.1384081980571772 | 0.5662476128148164 | 0.2235602398716922 | T | T | T |
| 0.1848055974239200 | 0.5560271959881919 | 0.4043360582718900 | T | T | T |
| 0.2952948493510866 | 0.5449398259492523 | 0.5140225015459146 | T | T | T |
| 0.4014164728036449 | 0.5667034250040516 | 0.3988331872171281 | T | T | T |
| 0.3941815068787936 | 0.5613008949282542 | 0.2025420270809497 | T | T | T |

**Structure files (CONTCAR) involved in this work:**

|                    |                    |                    |   |   |   |
|--------------------|--------------------|--------------------|---|---|---|
| 0.2679486958617778 | 0.5409612875598552 | 0.2521703999506470 | T | T | T |
| 0.1458452426746412 | 0.3206820750043421 | 0.2467106793929957 | T | T | T |
| 0.1959743460966293 | 0.3498730218314696 | 0.4224205227061517 | T | T | T |
| 0.3117537499164627 | 0.3530377655331214 | 0.5148543679076973 | T | T | T |
| 0.4132097657296377 | 0.3298718993024707 | 0.3913518404689654 | T | T | T |
| 0.3936757350331163 | 0.3409105797942419 | 0.1936615627538197 | T | T | T |
| 0.2731048038314910 | 0.3535045200985795 | 0.2633600367763206 | T | T | T |
| 0.1778745632795891 | 0.4464952991278696 | 0.2871272432622432 | T | T | T |
| 0.4109345605589126 | 0.4490817457693310 | 0.3077759380578997 | T | T | T |
| 0.0687203162643245 | 0.6247758571305524 | 0.0774537590126181 | T | T | T |
| 0.0795919452317633 | 0.4909429667246507 | 0.0831971391352783 | T | T | T |
| 0.1117207041339935 | 0.3620594614700639 | 0.0651695495309857 | T | T | T |
| 0.3002372975348739 | 0.6318482115193076 | 0.1159470378210521 | T | T | T |
| 0.3144726399894261 | 0.5009635164820627 | 0.0748724334619488 | T | T | T |
| 0.2927284032578695 | 0.3679845347007391 | 0.0675656186297044 | T | T | T |
| 0.5088018453451724 | 0.5383465186332405 | 0.2891661078107206 | T | T | T |
| 0.5119015108280991 | 0.3638382652210482 | 0.2682390380767901 | T | T | T |
| 0.4372206514602024 | 0.7490648687948753 | 0.6360424075682739 | T | T | T |
| 0.1948825392576447 | 0.7485989189611496 | 0.6495226907306797 | T | T | T |
| 0.2714710342033511 | 0.7490703458517713 | 0.0407961348952868 | T | T | T |
| 0.1080925509946698 | 0.7480200401789019 | 0.0455947382313061 | T | T | T |
| 0.0677427256467848 | 0.2462665111426487 | 0.1309610801806362 | T | T | T |
| 0.3033187885627602 | 0.2480249683517902 | 0.1465505501732734 | T | T | T |
| 0.2289593698217770 | 0.2499850542467801 | 0.5449326699677129 | T | T | T |
| 0.3953495152005672 | 0.2503298298474538 | 0.5455740881374330 | T | T | T |
| 0.5563789757898401 | 0.2490699562574042 | 0.3463158440838213 | T | T | T |
| 0.8171451118421986 | 0.2523777662324805 | 0.3411289416221137 | T | T | T |
| 0.7281350937884523 | 0.2497995271288488 | 0.9389438194795504 | T | T | T |
| 0.8926126173836501 | 0.2513395116138946 | 0.9490400369243128 | T | T | T |
| 0.9456313724825184 | 0.7528924386496921 | 0.8534593759653286 | T | T | T |
| 0.6869183236643441 | 0.7540734476666576 | 0.8414621293528004 | T | T | T |
| 0.7779815293866992 | 0.7464979783790282 | 0.4413884241072612 | T | T | T |
| 0.6079478634942813 | 0.7486523990465331 | 0.4461833552969683 | T | T | T |
| 0.9371499725421037 | 0.5016919908176214 | 0.5084586954298367 | T | T | T |
| 0.9833215136477194 | 0.6673844219591091 | 0.3068655916140214 | T | T | T |
| 0.9149013138808920 | 0.4397329501094344 | 0.4115042548543615 | T | T | T |
| 0.8727675553249823 | 0.5559124024085900 | 0.5570755306947510 | T | T | T |
| 1.0006287272359642 | 0.6075253954998817 | 0.2562969502243586 | T | T | T |
| 0.9816897186636692 | 0.6198486738044465 | 0.4423343850064183 | T | T | T |
| 0.9492835595579331 | 0.7043403985123041 | 0.4441493060634103 | T | T | T |
| 0.0382958837927622 | 0.6899948756410875 | 0.4371004763164822 | T | T | T |
| 0.9917583345076419 | 0.7105629859093774 | 0.2750506381325248 | T | T | T |
| 0.0259029060041854 | 0.3753924341306233 | 0.4417440723076199 | T | T | T |
| 0.0505430803765900 | 0.4590861255172111 | 0.4031607535461541 | T | T | T |
| 0.0326684796677543 | 0.4429213428344574 | 0.5316264885158580 | T | T | T |
| 0.1052426150508079 | 0.4070948181080064 | 0.4732265768201762 | T | T | T |
| 0.9887797810063118 | 0.6713662199173069 | 0.4147860798292330 | T | T | T |
| 0.0530698924966285 | 0.4213404011239673 | 0.4630061237795085 | T | T | T |

**Figure S10 Zn-TS**

Si Al O Zn H C

1.0000000000000000

20.0219999999999985 0.0000000000000000 0.0000000000000000

0.0000000000000000 19.8990000000000009 0.0000000000000000

**Structure files (CONTCAR) involved in this work:**

0.0000000000000000 0.0000000000000000 13.3829999999999991  
93 3 194 2 9 2

## Selective dynamics

## Direct

|                    |                     |                    |   |   |   |
|--------------------|---------------------|--------------------|---|---|---|
| 0.4235247021940495 | 0.0585573746220215  | 0.6475213678869507 | T | T | T |
| 0.3070162412743044 | 0.0278580173550194  | 0.7930279318657105 | T | T | T |
| 0.2829636187228702 | 0.0564085083149476  | 0.0154722608034457 | T | T | T |
| 0.1242934609267792 | 0.0599623695785987  | 0.0107214795618165 | T | T | T |
| 0.0690044946833516 | 0.0308040899251123  | 0.7996440786516332 | T | T | T |
| 0.1824161185901984 | 0.0587787074915674  | 0.6623691125916880 | T | T | T |
| 0.4192212376788038 | 0.8257647071306167  | 0.6667285130405589 | T | T | T |
| 0.3056917241746694 | 0.8693259556141891  | 0.8079019449020746 | T | T | T |
| 0.2669235729942931 | 0.8294173563788458  | 0.0248308889599134 | T | T | T |
| 0.1123885180318060 | 0.8258481722599309  | 0.0102726712182347 | T | T | T |
| 0.0660068640882529 | 0.8736398948679632  | 0.7969167910197469 | T | T | T |
| 0.1841155666793111 | 0.8280373218925011  | 0.6720320582393147 | T | T | T |
| 0.0780762607403280 | 0.9394255745296999  | 0.1482071763972004 | T | T | T |
| 0.1955438274004826 | 0.9695092608676980  | 0.2939035491364126 | T | T | T |
| 0.2194363342236766 | 0.9396168971813632  | 0.5154557078192343 | T | T | T |
| 0.3788357479900518 | 0.9350807776506693  | 0.5123415548600857 | T | T | T |
| 0.4347912462296860 | 0.9672523780933084  | 0.3003836227575041 | T | T | T |
| 0.3207617500438744 | 0.9386427126441368  | 0.1635136183271073 | T | T | T |
| 0.0836404120772285 | 0.1699344058697245  | 0.1657150299582234 | T | T | T |
| 0.1961910485207201 | 0.1283319228776628  | 0.3094437273393230 | T | T | T |
| 0.2342542195602876 | 0.17010990925558615 | 0.5252068080879003 | T | T | T |
| 0.3891361254933697 | 0.1732471267481006  | 0.5080268744779690 | T | T | T |
| 0.4364074525117018 | 0.1258706818746833  | 0.2946101552843705 | T | T | T |
| 0.3161441480866656 | 0.1693572675747821  | 0.1711297697991123 | T | T | T |
| 0.5767282687851698 | 0.5541074131791293  | 0.3516878244947819 | T | T | T |
| 0.6899850357793109 | 0.5262782484946458  | 0.1974426408225824 | T | T | T |
| 0.7127989348779585 | 0.5694118920874016  | 0.9811251046527620 | T | T | T |
| 0.8709799407802837 | 0.5728151479911887  | 0.9820250913829257 | T | T | T |
| 0.8100935884682738 | 0.5479201229336118  | 0.3436257501441012 | T | T | T |
| 0.5730418708399827 | 0.3281513606855994  | 0.3295720076359311 | T | T | T |
| 0.6938136099405456 | 0.3721899043391797  | 0.1904466330064793 | T | T | T |
| 0.7305059858328095 | 0.3265501722034561  | 0.9794814474491644 | T | T | T |
| 0.8851721762261704 | 0.3248387298555449  | 0.9927772400848581 | T | T | T |
| 0.9437981466069385 | 0.3733444767375083  | 0.1870487497147434 | T | T | T |
| 0.9182875009316717 | 0.4444242724770114  | 0.8595987074907905 | T | T | T |
| 0.7993202484153972 | 0.4719754440416032  | 0.7183944250677875 | T | T | T |
| 0.7747008358949955 | 0.4357840017396113  | 0.4947295555751198 | T | T | T |
| 0.6164332293521174 | 0.4275709898996883  | 0.4894906583616009 | T | T | T |
| 0.5660887963369050 | 0.4682322989034795  | 0.7037467156323393 | T | T | T |
| 0.6747471156708215 | 0.4467502126118542  | 0.8540775082815345 | T | T | T |
| 0.9197624089071389 | 0.6775455153089867  | 0.8266642631319203 | T | T | T |
| 0.7705384018446281 | 0.6671658637436375  | 0.4624530329928502 | T | T | T |
| 0.6144361967352311 | 0.6711183413209142  | 0.4836929056553339 | T | T | T |
| 0.5602541480336195 | 0.6268574323619032  | 0.6962767737056692 | T | T | T |
| 0.6710272470183560 | 0.6752051015766647  | 0.8239426508422181 | T | T | T |
| 0.5795069576134534 | 0.9438457230646211  | 0.3544243529245819 | T | T | T |
| 0.6993653198211953 | 0.9731289799670813  | 0.2102087922823302 | T | T | T |
| 0.7218365633257026 | 0.9379597916707142  | 0.9884206087039231 | T | T | T |
| 0.8824391662416187 | 0.9334747536616933  | 0.9919415642708668 | T | T | T |



**Structure files (CONTCAR) involved in this work:**

|                    |                    |                    |   |   |   |
|--------------------|--------------------|--------------------|---|---|---|
| 0.9338303154723417 | 0.9687454046304589 | 0.2025058436280612 | T | T | T |
| 0.8229236710691251 | 0.9449317844075583 | 0.3494905562478366 | T | T | T |
| 0.5789675021013841 | 0.1729472569412479 | 0.3247869327834666 | T | T | T |
| 0.6986669164064239 | 0.1319833086611349 | 0.1882938164977276 | T | T | T |
| 0.7326016157618415 | 0.1706497519167064 | 0.9677004087062958 | T | T | T |
| 0.8870557493594207 | 0.1727415871992042 | 0.9814528707151136 | T | T | T |
| 0.9369288843873995 | 0.1266834681885091 | 0.1945077864164355 | T | T | T |
| 0.8210365479311628 | 0.1738332312116398 | 0.3247598425708311 | T | T | T |
| 0.9240298978510544 | 0.0545520880533479 | 0.8528445535432992 | T | T | T |
| 0.8044252132929312 | 0.0263681205302297 | 0.7031550480152458 | T | T | T |
| 0.7817455671207424 | 0.0658040651495765 | 0.4864995155065954 | T | T | T |
| 0.6212187910650476 | 0.0688713702105318 | 0.4867300105055626 | T | T | T |
| 0.5682006969296490 | 0.0315985337016276 | 0.6956754525169027 | T | T | T |
| 0.6812680665729359 | 0.0538656596449346 | 0.8421068187316537 | T | T | T |
| 0.9242299892586141 | 0.8298959224810104 | 0.8321684533411735 | T | T | T |
| 0.8037170502085994 | 0.8691617563522122 | 0.6909901810479802 | T | T | T |
| 0.7710027205075278 | 0.8248423931233616 | 0.4746540407047158 | T | T | T |
| 0.6155416205695439 | 0.8250551326460106 | 0.4870385202029217 | T | T | T |
| 0.5640590571340186 | 0.8745943105835612 | 0.6941044693282413 | T | T | T |
| 0.6795374057854517 | 0.8339243568673629 | 0.8277556920952578 | T | T | T |
| 0.4212954577573332 | 0.4418606835131042 | 0.6464944364122833 | T | T | T |
| 0.3037581051863329 | 0.4695528500547436 | 0.7914385646275549 | T | T | T |
| 0.2783730083573900 | 0.4401317703318897 | 0.0142891757572003 | T | T | T |
| 0.1202450459867578 | 0.4358456493930269 | 0.0145766182679010 | T | T | T |
| 0.0626761498386248 | 0.4684735156030405 | 0.8013337547833962 | T | T | T |
| 0.1769566593414750 | 0.4401463222036471 | 0.6628053479440043 | T | T | T |
| 0.4155207218852037 | 0.6725562097419002 | 0.6608078856887194 | T | T | T |
| 0.3026523736014075 | 0.6281507934632697 | 0.8034731033237674 | T | T | T |
| 0.2669852785510505 | 0.6694754194210500 | 0.0208050065582467 | T | T | T |
| 0.1130884582759744 | 0.6718430171481068 | 0.0036356103873880 | T | T | T |
| 0.0617063450932090 | 0.6273723697677112 | 0.7918496585088697 | T | T | T |
| 0.1813537081380318 | 0.6697199257155299 | 0.6680804614791974 | T | T | T |
| 0.0756769004321754 | 0.5587178827638930 | 0.1464900932202327 | T | T | T |
| 0.1929133042563765 | 0.5270210632380719 | 0.2910099141384275 | T | T | T |
| 0.2146281449350798 | 0.5577110484953687 | 0.5156252995681325 | T | T | T |
| 0.3734163290007184 | 0.5637171571413885 | 0.5119788517056802 | T | T | T |
| 0.4285714358422985 | 0.5281695905132009 | 0.3008818167721301 | T | T | T |
| 0.3188614964720915 | 0.5582446879747617 | 0.1591630349759466 | T | T | T |
| 0.0866250343366609 | 0.3219914256448259 | 0.1616986285304294 | T | T | T |
| 0.1969348164585365 | 0.3685069989171363 | 0.3053449572667202 | T | T | T |
| 0.2323366011326541 | 0.3298970179354797 | 0.5238628857258831 | T | T | T |
| 0.3870582517557877 | 0.3271966938131298 | 0.5063037839432629 | T | T | T |
| 0.4316951994340240 | 0.3710778691840813 | 0.2911656834160808 | T | T | T |
| 0.3146685477812487 | 0.3274016559387801 | 0.1677656901796138 | T | T | T |
| 0.9205049657189331 | 0.5269738854834339 | 0.1883309735800280 | T | T | T |
| 0.8224311902905522 | 0.3366915791486867 | 0.3236486541037449 | T | T | T |
| 0.7970501590408318 | 0.6352855169531533 | 0.6942475177726909 | T | T | T |
| 0.3583909313506330 | 0.0663113250018247 | 0.7189253985433086 | T | T | T |
| 0.3152184435730525 | 0.0590152826223715 | 0.9043012562403254 | T | T | T |
| 0.2032851067009980 | 0.0422078269840969 | 0.0078873194758471 | T | T | T |
| 0.0947188396993551 | 0.0696233977778688 | 0.8992034702602606 | T | T | T |
| 0.1059081102286743 | 0.0618367433567791 | 0.7020117862634490 | T | T | T |
| 0.2304959158435032 | 0.0383381996781725 | 0.7556817634244775 | T | T | T |

**Structure files (CONTCAR) involved in this work:**

|                    |                    |                    |   |   |   |
|--------------------|--------------------|--------------------|---|---|---|
| 0.3614977954391089 | 0.8242771288158451 | 0.7518617762612304 | T | T | T |
| 0.3078807704307547 | 0.8518353400768436 | 0.9258846342416868 | T | T | T |
| 0.1892553477202616 | 0.8524483703749491 | 0.0133348266786864 | T | T | T |
| 0.0842983517627473 | 0.8318428000404416 | 0.8974969691401290 | T | T | T |
| 0.1064833671551621 | 0.8413529880242798 | 0.7027690696496236 | T | T | T |
| 0.2314943486012993 | 0.8518990789976573 | 0.7646562059843846 | T | T | T |
| 0.3239317715432236 | 0.9479432641181565 | 0.7907453412733162 | T | T | T |
| 0.0877210260789803 | 0.9515519906475102 | 0.8111905123928477 | T | T | T |
| 0.4330517973880071 | 0.1270162057866860 | 0.5829737802017438 | T | T | T |
| 0.4160210082892973 | 0.9953310982687105 | 0.5716748377290070 | T | T | T |
| 0.3918222278626821 | 0.8638066521559039 | 0.5675833851818123 | T | T | T |
| 0.2029227923942437 | 0.1325683846214298 | 0.6216523636561090 | T | T | T |
| 0.1872036755974451 | 0.0030765225030821 | 0.5740781242154643 | T | T | T |
| 0.2025158242401218 | 0.8691939351207251 | 0.5711149664494808 | T | T | T |
| 0.9893933475360929 | 0.0409454363112599 | 0.7839713500606587 | T | T | T |
| 0.9861551339298782 | 0.8683924217398076 | 0.7765018745386472 | T | T | T |
| 0.1437364842863438 | 0.9325594830367807 | 0.2186433060526591 | T | T | T |
| 0.1873482272958104 | 0.9364968246824965 | 0.4040930581265586 | T | T | T |
| 0.2994437961753226 | 0.9507949086672275 | 0.5087803310571243 | T | T | T |
| 0.4090265368983127 | 0.9294451231326656 | 0.4007286947282993 | T | T | T |
| 0.3968841828695310 | 0.9351941240821260 | 0.2042547145001956 | T | T | T |
| 0.2718076568194754 | 0.9588465098301769 | 0.2559233100469960 | T | T | T |
| 0.1399644058146751 | 0.1721344662784298 | 0.2525890374867461 | T | T | T |
| 0.1929307400164203 | 0.1478228288364330 | 0.4265656501254927 | T | T | T |
| 0.3117868760470085 | 0.1480166295936446 | 0.5108285370542923 | T | T | T |
| 0.4172293672555564 | 0.1674589028618079 | 0.3950085023416727 | T | T | T |
| 0.3940770246021643 | 0.1566729445328946 | 0.2009515993372733 | T | T | T |
| 0.2701694801269378 | 0.1451201112478635 | 0.2652668455762507 | T | T | T |
| 0.1786951563433695 | 0.0492637204916721 | 0.2950046063401424 | T | T | T |
| 0.4177511669547851 | 0.0470212960838551 | 0.3094128313508924 | T | T | T |
| 0.0676034253785174 | 0.8689498111252963 | 0.0883893864399437 | T | T | T |
| 0.0851975940923330 | 0.9991547559498727 | 0.0664010769431870 | T | T | T |
| 0.1123486626233303 | 0.1296146609384183 | 0.0698417035636002 | T | T | T |
| 0.2999755285481674 | 0.8651041142179178 | 0.1215058597285000 | T | T | T |
| 0.3170085243509664 | 0.9945687844685100 | 0.0755723441911349 | T | T | T |
| 0.2970667366667351 | 0.1274689621497048 | 0.0709706132548472 | T | T | T |
| 0.5141103622961836 | 0.9545764955080657 | 0.2844537598549891 | T | T | T |
| 0.5160316486240127 | 0.1335978072463068 | 0.2733044641137273 | T | T | T |
| 0.6352407888935092 | 0.5611347134143067 | 0.2695755675438508 | T | T | T |
| 0.6992702898063433 | 0.5740221652609073 | 0.1004697684377201 | T | T | T |
| 0.7919155833018711 | 0.5625866868079916 | 0.9546154283662152 | T | T | T |
| 0.8827570855794946 | 0.5769724618398309 | 0.1005738339191584 | T | T | T |
| 0.8845466681413111 | 0.5260884635389728 | 0.3084184556751255 | T | T | T |
| 0.7601550795757780 | 0.5234760640470320 | 0.2574547642252315 | T | T | T |
| 0.6400762681275382 | 0.3367337775582939 | 0.2647614909100453 | T | T | T |
| 0.6901518698641432 | 0.3322398735269813 | 0.0840342158670931 | T | T | T |
| 0.8078740517383143 | 0.3502176506734978 | 0.9947894264428483 | T | T | T |
| 0.9139974955389344 | 0.3197495953377905 | 0.1063738883957635 | T | T | T |
| 0.9055597029729823 | 0.3639948962972628 | 0.2944840190966895 | T | T | T |
| 0.7669668209619491 | 0.3694534655667164 | 0.2381818814407545 | T | T | T |
| 0.6694937743929459 | 0.4497933099702213 | 0.1692288539924086 | T | T | T |
| 0.9355823170722954 | 0.4478835969780178 | 0.1447690840680915 | T | T | T |
| 0.5690340342219523 | 0.6252514121891563 | 0.4099313508266236 | T | T | T |

**Structure files (CONTCAR) involved in this work:**

|                    |                    |                    |   |   |   |
|--------------------|--------------------|--------------------|---|---|---|
| 0.5927594393994577 | 0.4960724278842995 | 0.4338073250114052 | T | T | T |
| 0.5806121519575828 | 0.3628068523061075 | 0.4394661316190328 | T | T | T |
| 0.8033156436969385 | 0.6283164878380398 | 0.3665633765632750 | T | T | T |
| 0.7910431353117588 | 0.5127431490041519 | 0.4528282936469147 | T | T | T |
| 0.8242490473529595 | 0.3853056114108170 | 0.4360101806100672 | T | T | T |
| 0.0055151664404203 | 0.5601941334496433 | 0.2154125303331905 | T | T | T |
| 0.0221909475307109 | 0.3579232609679577 | 0.2105190680194239 | T | T | T |
| 0.8530350570103498 | 0.4336955189033741 | 0.7885275800788191 | T | T | T |
| 0.7943210748468827 | 0.4331347770526379 | 0.6118924488880702 | T | T | T |
| 0.6968745472753768 | 0.4187948554779744 | 0.4765221704975296 | T | T | T |
| 0.5965766262306385 | 0.4299673545634169 | 0.6064580163148363 | T | T | T |
| 0.6011304469297554 | 0.4397424208100268 | 0.8044339542285024 | T | T | T |
| 0.7260475246588169 | 0.4731304069099482 | 0.7680562689179521 | T | T | T |
| 0.8584193097276505 | 0.6810946535858140 | 0.7508663766497806 | T | T | T |
| 0.8132072268668299 | 0.6437632984211406 | 0.5618902046676468 | T | T | T |
| 0.6924459713787998 | 0.6465869344952051 | 0.4784313705147988 | T | T | T |
| 0.5864144246684186 | 0.6648400019688564 | 0.5963512007613994 | T | T | T |
| 0.5925172522784022 | 0.6637389433858482 | 0.7932552117833560 | T | T | T |
| 0.7171627962125321 | 0.6475743055657099 | 0.7341818805515613 | T | T | T |
| 0.8241774556140647 | 0.5490749729109714 | 0.6956273969295464 | T | T | T |
| 0.5809289989327648 | 0.5480358785203248 | 0.6915819554665704 | T | T | T |
| 0.9290226787927484 | 0.3767661410110622 | 0.9258022652484713 | T | T | T |
| 0.9108426308175972 | 0.5096320594272695 | 0.9309556375596846 | T | T | T |
| 0.8999100867804364 | 0.6412857944154001 | 0.9314891806913138 | T | T | T |
| 0.6965525836126689 | 0.3736136822204827 | 0.8948210851066385 | T | T | T |
| 0.6734240619114765 | 0.5025907360473649 | 0.9422091611819353 | T | T | T |
| 0.6839195366361963 | 0.6369451192551232 | 0.9297564945469302 | T | T | T |
| 0.4867571746239501 | 0.4527997720997883 | 0.7156163516735189 | T | T | T |
| 0.4793099868761024 | 0.6315990928277352 | 0.7039586506045373 | T | T | T |
| 0.6450715717033224 | 0.9388121899281643 | 0.2840348301287751 | T | T | T |
| 0.6979094542682909 | 0.9341029022742381 | 0.1039072470785035 | T | T | T |
| 0.8025715933487946 | 0.9438773777304297 | 0.9803867774638314 | T | T | T |
| 0.9034906734331573 | 0.9267486082238167 | 0.1085786035044105 | T | T | T |
| 0.8987322722604512 | 0.9454547397499243 | 0.3061738795381834 | T | T | T |
| 0.7733054295651427 | 0.9647860340328440 | 0.2582056860008362 | T | T | T |
| 0.6415140320598878 | 0.1731945192339795 | 0.2483169927788224 | T | T | T |
| 0.6949077623531786 | 0.1550966739906199 | 0.0723932553924490 | T | T | T |
| 0.8101034900120541 | 0.1463083828108299 | 0.9774482086378765 | T | T | T |
| 0.9148856476559910 | 0.1670708560283750 | 0.0946538903718087 | T | T | T |
| 0.8976909823662167 | 0.1551902497352904 | 0.2914354758725223 | T | T | T |
| 0.7719916916881584 | 0.1473823833363591 | 0.2344132256196322 | T | T | T |
| 0.6820388831104753 | 0.0521140517334139 | 0.1963209635017896 | T | T | T |
| 0.9204490787260187 | 0.0474731155004527 | 0.1796129928591472 | T | T | T |
| 0.5713439779523246 | 0.8738787267951151 | 0.4161192071274625 | T | T | T |
| 0.5840231595192069 | 0.0056294072818006 | 0.4335820617913518 | T | T | T |
| 0.6002755479363953 | 0.1377761587824655 | 0.4298520653600125 | T | T | T |
| 0.8083843513626859 | 0.8695605880896108 | 0.3905493024374967 | T | T | T |
| 0.8161659218109045 | 0.9986376716831546 | 0.4398518801080756 | T | T | T |
| 0.8039003796898018 | 0.1327415716047403 | 0.4272232573143249 | T | T | T |
| 0.0130211448378815 | 0.9529628687869280 | 0.2172228951876285 | T | T | T |
| 0.0169547197148357 | 0.1353651118226039 | 0.2114503745371851 | T | T | T |
| 0.8586799805452743 | 0.0550558659101075 | 0.7818711634697945 | T | T | T |
| 0.8061017071761519 | 0.0717572179882351 | 0.6022605859217175 | T | T | T |

**Structure files (CONTCAR) involved in this work:**

|                    |                    |                    |   |   |   |
|--------------------|--------------------|--------------------|---|---|---|
| 0.7011039431363139 | 0.0565782248240073 | 0.4805484103434132 | T | T | T |
| 0.5972938895064386 | 0.0752980393053184 | 0.6023886950205519 | T | T | T |
| 0.6055591053591127 | 0.0508815543472971 | 0.7992759602868944 | T | T | T |
| 0.7304770101261796 | 0.0301182014545805 | 0.7522929278579410 | T | T | T |
| 0.8593821084230913 | 0.8341841788263072 | 0.7607436547106547 | T | T | T |
| 0.8067898076983453 | 0.8324620209721821 | 0.5827832261971629 | T | T | T |
| 0.6934712178206658 | 0.8485969797394803 | 0.4827951934872432 | T | T | T |
| 0.5890717734875007 | 0.8281330661521472 | 0.6015015839644129 | T | T | T |
| 0.6035205151428834 | 0.8534283367400224 | 0.7953048789683652 | T | T | T |
| 0.7299294359662448 | 0.8598895372955914 | 0.7398307895345619 | T | T | T |
| 0.8206912170835570 | 0.9483793854446573 | 0.6765887100393397 | T | T | T |
| 0.5787768111000701 | 0.9527518876658312 | 0.6675626240980080 | T | T | T |
| 0.9321542930158498 | 0.1273739638461823 | 0.9063809156931526 | T | T | T |
| 0.9194928784219906 | 0.9971771466105082 | 0.9394948243679502 | T | T | T |
| 0.9068941409882253 | 0.8644844163096126 | 0.9389676520676198 | T | T | T |
| 0.6972552286924950 | 0.1301935730738126 | 0.8767534613741711 | T | T | T |
| 0.6886195570160606 | 0.0041804272971409 | 0.9377349121787485 | T | T | T |
| 0.6973564999186150 | 0.8699706243620040 | 0.9330790417902981 | T | T | T |
| 0.4896347974562456 | 0.0475031417998955 | 0.7152848673142429 | T | T | T |
| 0.4845743163724997 | 0.8632490390441969 | 0.7121183106121485 | T | T | T |
| 0.3559048668254962 | 0.4318841744884064 | 0.7173410226352336 | T | T | T |
| 0.3089298816704921 | 0.4366941520744396 | 0.9021306215679701 | T | T | T |
| 0.1986461009534075 | 0.4571074976781341 | 0.0123015846943135 | T | T | T |
| 0.0895501591743805 | 0.4338328845397794 | 0.9034378730574727 | T | T | T |
| 0.1013826349629133 | 0.4352477634556517 | 0.7064563854240499 | T | T | T |
| 0.2273891947974064 | 0.4602714117119334 | 0.7530031834037396 | T | T | T |
| 0.3567181630401626 | 0.6731663033276961 | 0.7441522024239476 | T | T | T |
| 0.3065822069349527 | 0.6496646245141533 | 0.9197441146618812 | T | T | T |
| 0.1896664453445753 | 0.6450598005679953 | 0.0089454289545991 | T | T | T |
| 0.0853211352093740 | 0.6685942666808445 | 0.8907130156188272 | T | T | T |
| 0.1031984827735558 | 0.6568496115719898 | 0.6964226838767240 | T | T | T |
| 0.2278127280765518 | 0.6419660528298423 | 0.7595358985115273 | T | T | T |
| 0.3217500730475368 | 0.5492133319279354 | 0.7923627168510339 | T | T | T |
| 0.0792255755904079 | 0.5483781956834585 | 0.8065865310105383 | T | T | T |
| 0.4318729012468006 | 0.3753780042308889 | 0.5775902928407493 | T | T | T |
| 0.4140071756983448 | 0.5067218519315919 | 0.5734822503120849 | T | T | T |
| 0.3865921667194238 | 0.6373796099833358 | 0.5599301572437928 | T | T | T |
| 0.1975584379281184 | 0.3675927814300159 | 0.6176443899401174 | T | T | T |
| 0.1780782427538608 | 0.4976517497703845 | 0.5765267823209803 | T | T | T |
| 0.1982736182091096 | 0.6305491569861792 | 0.5644709367132509 | T | T | T |
| 0.9834390447657458 | 0.4545394298090477 | 0.7878449594843783 | T | T | T |
| 0.9823949691252652 | 0.6373431362860598 | 0.7731843949778149 | T | T | T |
| 0.1382635035895356 | 0.5664314760814743 | 0.2220429266442981 | T | T | T |
| 0.1852886263199585 | 0.5573530032805399 | 0.4025959761732990 | T | T | T |
| 0.2945253258464964 | 0.5445825914219620 | 0.5155655080477805 | T | T | T |
| 0.3994748069396600 | 0.5668237919630366 | 0.3980729808685188 | T | T | T |
| 0.3944798511807741 | 0.5608036633784298 | 0.2020042332135195 | T | T | T |
| 0.2678532110533773 | 0.5403293784325578 | 0.2503632747236944 | T | T | T |
| 0.1451736846110940 | 0.3212037359199451 | 0.2454070073012986 | T | T | T |
| 0.1925336448375732 | 0.3511625831490341 | 0.4230491514501259 | T | T | T |
| 0.3098795326280399 | 0.3530213713029409 | 0.5129717113552898 | T | T | T |
| 0.4118845791735137 | 0.3292018245646512 | 0.3911152253536026 | T | T | T |
| 0.3928568697798552 | 0.3409624126400534 | 0.1939640265934546 | T | T | T |

**Structure files (CONTCAR) involved in this work:**

|                    |                    |                    |   |   |   |
|--------------------|--------------------|--------------------|---|---|---|
| 0.2719751893435694 | 0.3534533921632749 | 0.2644713956761907 | T | T | T |
| 0.1767294639963029 | 0.4470270537852965 | 0.2871470129352255 | T | T | T |
| 0.4099559618343034 | 0.4488838070421575 | 0.3083118985500224 | T | T | T |
| 0.0681599149049730 | 0.6245043399271911 | 0.0765238916354846 | T | T | T |
| 0.0789695060993742 | 0.4905789983965649 | 0.0821367142442044 | T | T | T |
| 0.1121093266394638 | 0.3618332109173303 | 0.0626810420690001 | T | T | T |
| 0.3005563785230015 | 0.6316957430469852 | 0.1151567948024880 | T | T | T |
| 0.3150705647447892 | 0.5010767758140473 | 0.0730393322559984 | T | T | T |
| 0.2919776604767370 | 0.3683613792734532 | 0.0682665198010669 | T | T | T |
| 0.5083747975476133 | 0.5375373523442106 | 0.2923103830108545 | T | T | T |
| 0.5112015049334914 | 0.3639364719402148 | 0.2703302531129821 | T | T | T |
| 0.4370022915602974 | 0.7491340513539699 | 0.6350317023937003 | T | T | T |
| 0.1950881065493162 | 0.7488522710655240 | 0.6486602908938871 | T | T | T |
| 0.2712121260846010 | 0.7491446062455236 | 0.0413460805484371 | T | T | T |
| 0.1079719526166058 | 0.7479175872859457 | 0.0458077329542224 | T | T | T |
| 0.0686944282135667 | 0.2459659837183764 | 0.1286650592258438 | T | T | T |
| 0.3024654933341978 | 0.2481354276693689 | 0.1470190892515890 | T | T | T |
| 0.2274537625826970 | 0.2500607174024839 | 0.5434456124277338 | T | T | T |
| 0.3937790299768497 | 0.2505172357655774 | 0.5459793215429671 | T | T | T |
| 0.5565929548808501 | 0.2494988846341312 | 0.3483101456567853 | T | T | T |
| 0.8136188549336607 | 0.2523683812474198 | 0.3444619665989863 | T | T | T |
| 0.7277723352570952 | 0.2496584566672567 | 0.9397246880583088 | T | T | T |
| 0.8910224749117794 | 0.2502571064441189 | 0.9439960227638012 | T | T | T |
| 0.9458032505835042 | 0.7529973341077564 | 0.8539093157782228 | T | T | T |
| 0.6855983316923304 | 0.7541515540679710 | 0.8445839265039848 | T | T | T |
| 0.7774517252270859 | 0.7467857023882142 | 0.4407546937166831 | T | T | T |
| 0.6086215075118697 | 0.7485369392608542 | 0.4467012671286457 | T | T | T |
| 0.9373511943196705 | 0.5074500583501194 | 0.5063622792296861 | T | T | T |
| 0.9850789831304924 | 0.6661116605228717 | 0.3090520373723948 | T | T | T |
| 0.9220729580469178 | 0.4321610612299271 | 0.4093753764401395 | T | T | T |
| 0.8757459042283788 | 0.5607036846308611 | 0.5653061727604503 | T | T | T |
| 0.0007045983818878 | 0.6056831589441648 | 0.2568286095015508 | T | T | T |
| 0.9823318356227272 | 0.6186617604032568 | 0.4445402065460981 | T | T | T |
| 0.9505726011791362 | 0.7033067502714340 | 0.4459927122804672 | T | T | T |
| 0.0394926918498798 | 0.6883709822826761 | 0.4400615919522254 | T | T | T |
| 0.9928836848373259 | 0.7094591011600857 | 0.2774345622675319 | T | T | T |
| 0.0197511099266311 | 0.3634015222346593 | 0.4492840105748112 | T | T | T |
| 0.0551502980547242 | 0.4360460874435483 | 0.3905050175847359 | T | T | T |
| 0.9853462321636404 | 0.4685223926816595 | 0.4975718948436954 | T | T | T |
| 0.0567844859373228 | 0.4256051502082007 | 0.5226309267900227 | T | T | T |
| 0.9899952134853298 | 0.6701236621614902 | 0.4169862627420550 | T | T | T |
| 0.0263332845865697 | 0.4182571439437497 | 0.4550612293482230 | T | T | T |

**Figure S10 Zn-FS**

Si Al O Zn H C

1.0000000000000000

20.0219999999999985 0.0000000000000000 0.0000000000000000

0.0000000000000000 19.8990000000000009 0.0000000000000000

0.0000000000000000 0.0000000000000000 13.3829999999999991

93 3 194 2 9 2

Selective dynamics

Direct

0.4231628931501809 0.0589849561123131 0.6466527540527077 T T T

0.3067268520606149 0.0278797377244879 0.7922615711953571 T T T

**Structure files (CONTCAR) involved in this work:**

|                    |                    |                    |   |   |   |
|--------------------|--------------------|--------------------|---|---|---|
| 0.2826844479973022 | 0.0565078739662473 | 0.0143784044009321 | T | T | T |
| 0.1240128384120596 | 0.0589807610550730 | 0.0099207265563490 | T | T | T |
| 0.0690918452148706 | 0.0303966727605049 | 0.7993387610181545 | T | T | T |
| 0.1820094681677245 | 0.0585597531348064 | 0.6613625332110631 | T | T | T |
| 0.4187642440802570 | 0.8258808791513759 | 0.6673675053470636 | T | T | T |
| 0.3050421498067747 | 0.8695360668242229 | 0.8079607241996245 | T | T | T |
| 0.2662215813254813 | 0.8294979561988612 | 0.0257658723953358 | T | T | T |
| 0.1116408780903515 | 0.8253669048514187 | 0.0123815318198123 | T | T | T |
| 0.0660813597983582 | 0.8734573978524441 | 0.7984146803903797 | T | T | T |
| 0.1834815530834412 | 0.8283956902608361 | 0.6715818165697813 | T | T | T |
| 0.0770422513358501 | 0.9393157090629968 | 0.1476308162542538 | T | T | T |
| 0.1949433380093538 | 0.9701029733745773 | 0.2926456773774763 | T | T | T |
| 0.2190372553212980 | 0.9397876849016755 | 0.5144170819997623 | T | T | T |
| 0.3787056299079438 | 0.9351378007384862 | 0.5122732242976433 | T | T | T |
| 0.4343837375049034 | 0.9679867312154959 | 0.3005602894000672 | T | T | T |
| 0.3207305294672434 | 0.9393860429326826 | 0.1623500625074353 | T | T | T |
| 0.0826043373296847 | 0.1701297268867966 | 0.1648438064404556 | T | T | T |
| 0.1947222456019968 | 0.1288692644538093 | 0.3089652935635347 | T | T | T |
| 0.2330185382348373 | 0.1700747471137543 | 0.5250153142153794 | T | T | T |
| 0.3875939290675288 | 0.1735829774155526 | 0.5080948560213193 | T | T | T |
| 0.4350754077363205 | 0.1267043439249482 | 0.2950054029853567 | T | T | T |
| 0.3150301387202272 | 0.1697264967257481 | 0.1703181107304662 | T | T | T |
| 0.5769374183738493 | 0.5554098252469730 | 0.3506886580800391 | T | T | T |
| 0.6896298223304573 | 0.5272493037509338 | 0.1987482703047830 | T | T | T |
| 0.7140407467909097 | 0.5683974746905215 | 0.9809980581511881 | T | T | T |
| 0.8719064757540240 | 0.5721269367195893 | 0.9829262259323157 | T | T | T |
| 0.8105638136860632 | 0.5503427404833274 | 0.3442404718358946 | T | T | T |
| 0.5728085185437642 | 0.3287407016309081 | 0.3296021142015872 | T | T | T |
| 0.6935426967468050 | 0.3733975088381534 | 0.1916294708048761 | T | T | T |
| 0.7312707526644775 | 0.3271131121820246 | 0.9782041334134431 | T | T | T |
| 0.8859528156253412 | 0.3241765603485936 | 0.9858845849762649 | T | T | T |
| 0.9419892448306745 | 0.3695173934374080 | 0.1848315429448200 | T | T | T |
| 0.9187135863993502 | 0.4451950008332215 | 0.8574334641886869 | T | T | T |
| 0.7983175057879600 | 0.4727685514174188 | 0.7176383160255581 | T | T | T |
| 0.7786792361594445 | 0.4360222306295930 | 0.4937538270760090 | T | T | T |
| 0.6208112196970601 | 0.4292025609486890 | 0.4868973481132392 | T | T | T |
| 0.5678916182286654 | 0.4690062139045870 | 0.7006617340413025 | T | T | T |
| 0.6743764938638810 | 0.4459546077774613 | 0.8535962808673887 | T | T | T |
| 0.9199549697821316 | 0.6774413212575531 | 0.8285343126583000 | T | T | T |
| 0.7669937440988991 | 0.6694176881724836 | 0.4631800781512906 | T | T | T |
| 0.6120438455146988 | 0.6722135537839198 | 0.4841075059469713 | T | T | T |
| 0.5586074917381200 | 0.6274920117758520 | 0.6961607553689246 | T | T | T |
| 0.6686371690777519 | 0.6752791600520498 | 0.8264236323471159 | T | T | T |
| 0.5789398738372619 | 0.9441437769025847 | 0.3548358737225084 | T | T | T |
| 0.6987680283795263 | 0.9735157343104905 | 0.2117408329308357 | T | T | T |
| 0.7214593376797656 | 0.9388504129856670 | 0.9895675934502137 | T | T | T |
| 0.8818185138479824 | 0.9341931693803184 | 0.9921260618284296 | T | T | T |
| 0.9327566547505375 | 0.9707859610825238 | 0.2031143166596530 | T | T | T |
| 0.8227323332517342 | 0.9453718974695108 | 0.3505260138599885 | T | T | T |
| 0.5781105691463352 | 0.1737685788372290 | 0.3261109477367073 | T | T | T |
| 0.6971488129254483 | 0.1320067845155361 | 0.1895605218336506 | T | T | T |
| 0.7316402747425030 | 0.1704921267807336 | 0.9681208848190543 | T | T | T |
| 0.8858841236271432 | 0.1724350588113443 | 0.9779805058354457 | T | T | T |

**Structure files (CONTCAR) involved in this work:**

|                    |                    |                    |   |   |   |
|--------------------|--------------------|--------------------|---|---|---|
| 0.9346882289834187 | 0.1294345156330439 | 0.1937353307585775 | T | T | T |
| 0.8187938943826903 | 0.1752360134775935 | 0.3266449334528463 | T | T | T |
| 0.9240831041391214 | 0.0536944339412783 | 0.8517622223014382 | T | T | T |
| 0.8029854569949055 | 0.0253526459843262 | 0.7041360300867680 | T | T | T |
| 0.7820768516172592 | 0.0654229487716023 | 0.4873668086099901 | T | T | T |
| 0.6215506445654669 | 0.0689763401550822 | 0.4867770905426486 | T | T | T |
| 0.5678592776903121 | 0.0317463042112355 | 0.6956061667115482 | T | T | T |
| 0.6799117677232567 | 0.0540646961522827 | 0.8436949296435189 | T | T | T |
| 0.9238137436785049 | 0.8300095443364106 | 0.8333705263488025 | T | T | T |
| 0.8027119347904541 | 0.8676253472394544 | 0.6915888672786248 | T | T | T |
| 0.7689547789605312 | 0.8263184576427302 | 0.4749856726214380 | T | T | T |
| 0.6141960882685399 | 0.8261483636561116 | 0.4879350668072022 | T | T | T |
| 0.5632441461189658 | 0.8747659550740926 | 0.6952473749323023 | T | T | T |
| 0.6784814929259362 | 0.8332888702294288 | 0.8303199052104088 | T | T | T |
| 0.4218277467843606 | 0.4422563295283095 | 0.6432371631124680 | T | T | T |
| 0.3039804140888804 | 0.4695224765535111 | 0.7894814808290866 | T | T | T |
| 0.2779417120456801 | 0.4405131772744405 | 0.0118302292096545 | T | T | T |
| 0.1204194128368176 | 0.4357419824828365 | 0.0122535501580245 | T | T | T |
| 0.0625653508385205 | 0.4699003599310700 | 0.8002013470218986 | T | T | T |
| 0.1761624959905700 | 0.4406321707050446 | 0.6603047393890724 | T | T | T |
| 0.4144480217486156 | 0.6727320978496998 | 0.6598642928694346 | T | T | T |
| 0.3015909849704305 | 0.6282562826031632 | 0.8025230720321745 | T | T | T |
| 0.2669016280275831 | 0.6696680345555436 | 0.0205845657109010 | T | T | T |
| 0.1129672161555501 | 0.6714542457578474 | 0.0039960381842080 | T | T | T |
| 0.0618245805356995 | 0.6285780287468004 | 0.7917050157840009 | T | T | T |
| 0.1807990686688411 | 0.6701946344157133 | 0.6669234621657224 | T | T | T |
| 0.0755644311913985 | 0.5575260060533437 | 0.1452884284725932 | T | T | T |
| 0.1933333765120347 | 0.5270610413085842 | 0.2892812490689075 | T | T | T |
| 0.2140602766249223 | 0.5583624983509829 | 0.5141934653613178 | T | T | T |
| 0.3726627318540058 | 0.5644274003192473 | 0.5105539074057487 | T | T | T |
| 0.4277882529285942 | 0.5274315472528269 | 0.3009039848522495 | T | T | T |
| 0.3194387630027067 | 0.5579718408253491 | 0.1572246251338355 | T | T | T |
| 0.0867759163582818 | 0.3220199193099423 | 0.1572663015671565 | T | T | T |
| 0.1961140243011237 | 0.3682155402762146 | 0.3035577105991486 | T | T | T |
| 0.2305268508500290 | 0.3297324561500545 | 0.5226762892210687 | T | T | T |
| 0.3848518778646657 | 0.3270793946764177 | 0.5053401792775087 | T | T | T |
| 0.4298914246424737 | 0.3705693411367000 | 0.2911993782750928 | T | T | T |
| 0.3138160747749073 | 0.3276493530664460 | 0.1660463507852521 | T | T | T |
| 0.9196424627729719 | 0.5254996196030665 | 0.1909748352577665 | T | T | T |
| 0.8223970336444528 | 0.3355047335841677 | 0.3239947030596567 | T | T | T |
| 0.7952094807665063 | 0.6371141513503209 | 0.6967161712806630 | T | T | T |
| 0.3580125431986606 | 0.0662671478551628 | 0.7180669278102401 | T | T | T |
| 0.3144633315241913 | 0.0599839618781933 | 0.9029693989196222 | T | T | T |
| 0.2030852015591635 | 0.0416181246384890 | 0.0072982866737521 | T | T | T |
| 0.0947198565113322 | 0.0699751240143864 | 0.8983564835947577 | T | T | T |
| 0.1055719039961420 | 0.0609816531136273 | 0.7011763226686286 | T | T | T |
| 0.2302837468015857 | 0.0373946739626085 | 0.7540449124792949 | T | T | T |
| 0.3607197515573329 | 0.8242399896800718 | 0.7520193425861348 | T | T | T |
| 0.3061603728740451 | 0.8516414448593034 | 0.9257783469482973 | T | T | T |
| 0.1883529521197860 | 0.8524033658953595 | 0.0166544417221367 | T | T | T |
| 0.0843695475594098 | 0.8317951704338836 | 0.8991547772777426 | T | T | T |
| 0.1059505722798342 | 0.8408444369477820 | 0.7038601525565713 | T | T | T |
| 0.2310495592703954 | 0.8527677774403943 | 0.7635648278626620 | T | T | T |

**Structure files (CONTCAR) involved in this work:**

|                    |                    |                    |   |   |   |
|--------------------|--------------------|--------------------|---|---|---|
| 0.3241371965906119 | 0.9480304370190723 | 0.7916325817275583 | T | T | T |
| 0.0882793237256236 | 0.9512822215218870 | 0.8119671820463448 | T | T | T |
| 0.4323043316102615 | 0.1274899312414924 | 0.5821523961042677 | T | T | T |
| 0.4159076339018076 | 0.9956056211296953 | 0.5710109694902057 | T | T | T |
| 0.3921993136506861 | 0.8640827110246507 | 0.5678814252195151 | T | T | T |
| 0.2018398319577729 | 0.1327635684710974 | 0.6217627797201852 | T | T | T |
| 0.1869004917339788 | 0.0037524883630933 | 0.5718431338114633 | T | T | T |
| 0.2008058688838069 | 0.8697854972983149 | 0.5704433681004578 | T | T | T |
| 0.9894692186592378 | 0.0399895286378740 | 0.7830716117758278 | T | T | T |
| 0.9861066337991363 | 0.8685532368927597 | 0.7788502430707492 | T | T | T |
| 0.1425928882679656 | 0.9330410002045121 | 0.2183911366759532 | T | T | T |
| 0.1878594085074227 | 0.9364631640728007 | 0.4025832893212936 | T | T | T |
| 0.2991957139539020 | 0.9502585674759071 | 0.5093055307269977 | T | T | T |
| 0.4085305310365434 | 0.9295880752831919 | 0.4004081112282175 | T | T | T |
| 0.3966271985295698 | 0.9363444841448982 | 0.2040417338134077 | T | T | T |
| 0.2710597904196198 | 0.9602626418728176 | 0.2534967756364658 | T | T | T |
| 0.1379721001792471 | 0.1724952633500388 | 0.2531277475349769 | T | T | T |
| 0.1918854022425610 | 0.1477012663842039 | 0.4263215796075415 | T | T | T |
| 0.3105177784420698 | 0.1477174311650224 | 0.5111615038222632 | T | T | T |
| 0.4151366052230496 | 0.1684216507072458 | 0.3948136979375887 | T | T | T |
| 0.3928082127527227 | 0.1568183748887037 | 0.2008654228979511 | T | T | T |
| 0.2684273017647636 | 0.1462732285831278 | 0.2641871003142440 | T | T | T |
| 0.1776229546127214 | 0.0497021333697323 | 0.2944052772620063 | T | T | T |
| 0.4172301251297659 | 0.0476802906171351 | 0.3103249326567240 | T | T | T |
| 0.0661355008573303 | 0.8676991808871585 | 0.0907724986868080 | T | T | T |
| 0.0850639745964586 | 0.9968749646615186 | 0.0626332403034617 | T | T | T |
| 0.1116019426632207 | 0.1274802172327896 | 0.0714482020646121 | T | T | T |
| 0.3004017898797089 | 0.8654234500803645 | 0.1213599960822889 | T | T | T |
| 0.3175670108311215 | 0.9945480298850711 | 0.0732577715932198 | T | T | T |
| 0.2963376115232918 | 0.1273610535622353 | 0.0704859522974590 | T | T | T |
| 0.5137662119492443 | 0.9556106864110863 | 0.2846789256574693 | T | T | T |
| 0.5146580967658356 | 0.1354093410645413 | 0.2745983438933370 | T | T | T |
| 0.6331373505213203 | 0.5648627068421617 | 0.2651268067409591 | T | T | T |
| 0.7029120772229451 | 0.5731130831388241 | 0.1008468694275611 | T | T | T |
| 0.7929947120860911 | 0.5640588080464898 | 0.9520025039210722 | T | T | T |
| 0.8825130718971737 | 0.5752567936551636 | 0.1014995755837470 | T | T | T |
| 0.8854028722680539 | 0.5330896965580805 | 0.3106756016139249 | T | T | T |
| 0.7578652579263577 | 0.5232699416857038 | 0.2640202704844904 | T | T | T |
| 0.6380592697299334 | 0.3358843381394504 | 0.2605892923670097 | T | T | T |
| 0.6932271594415053 | 0.3348458294477538 | 0.0841370662372135 | T | T | T |
| 0.8089493240601481 | 0.3510588495245460 | 0.9883083982454173 | T | T | T |
| 0.9158863290783253 | 0.3182471413224288 | 0.0977660598999348 | T | T | T |
| 0.9051805905845230 | 0.3512972113317872 | 0.2889568375283867 | T | T | T |
| 0.7652831699677992 | 0.3716856244398680 | 0.2439205055386720 | T | T | T |
| 0.6680712184492279 | 0.4508960078008270 | 0.1719586126471171 | T | T | T |
| 0.9294289494549884 | 0.4453203878823956 | 0.1496027129699018 | T | T | T |
| 0.5672197148098763 | 0.6262040542250672 | 0.4096564257735644 | T | T | T |
| 0.5984965501308798 | 0.4982587293315291 | 0.4314584096518115 | T | T | T |
| 0.5832335978471107 | 0.3652921364083745 | 0.4377387079068176 | T | T | T |
| 0.8007518323575882 | 0.6301814637406937 | 0.3688173876318629 | T | T | T |
| 0.7951354778372214 | 0.5145215705848384 | 0.4560077765323282 | T | T | T |
| 0.8308628173746671 | 0.3871876179395655 | 0.4357750804981588 | T | T | T |
| 0.0056870401166724 | 0.5579757815426941 | 0.2144699041170316 | T | T | T |



**Structure files (CONTCAR) involved in this work:**

|                    |                    |                    |   |   |   |
|--------------------|--------------------|--------------------|---|---|---|
| 0.0219018175848910 | 0.3585651501001100 | 0.2023267001717564 | T | T | T |
| 0.8529796775719191 | 0.4359823013829991 | 0.7873211419669918 | T | T | T |
| 0.7959252697635308 | 0.4328141447549759 | 0.6115425598096145 | T | T | T |
| 0.7013531765380994 | 0.4188261354558280 | 0.4717447270352566 | T | T | T |
| 0.6022423642948110 | 0.4323441891138085 | 0.6045261543721553 | T | T | T |
| 0.6006809329872239 | 0.4412940734577476 | 0.8036496513910159 | T | T | T |
| 0.7250085182121128 | 0.4718264433210994 | 0.7663181592554176 | T | T | T |
| 0.8575914448128991 | 0.6804528761984290 | 0.7545543134133689 | T | T | T |
| 0.8103302983399511 | 0.6477362153414181 | 0.5633886997215853 | T | T | T |
| 0.6898162466350213 | 0.6466771018531441 | 0.4801797787714999 | T | T | T |
| 0.5835958858210822 | 0.6666893778221930 | 0.5965072879603223 | T | T | T |
| 0.5904399075273007 | 0.6639428847836978 | 0.7938861679407827 | T | T | T |
| 0.7153274252189832 | 0.6503698502649051 | 0.7355367157459922 | T | T | T |
| 0.8202618355407425 | 0.5504193410806418 | 0.6937916927605825 | T | T | T |
| 0.5808583154156423 | 0.5492206317173742 | 0.6895696314959385 | T | T | T |
| 0.9302851170643415 | 0.3756472142478601 | 0.9184136770314570 | T | T | T |
| 0.9115136726749179 | 0.5085017960232925 | 0.9322936560461272 | T | T | T |
| 0.9023333235568481 | 0.6403918972432909 | 0.9335383806182720 | T | T | T |
| 0.6949694705149608 | 0.3721841930559331 | 0.8930375359735382 | T | T | T |
| 0.6757581358116926 | 0.5005736513116120 | 0.9434329316946792 | T | T | T |
| 0.6818132396172668 | 0.6345466360600629 | 0.9300205288651101 | T | T | T |
| 0.4888760256802617 | 0.4518362347779648 | 0.7090790154976719 | T | T | T |
| 0.4775950979751091 | 0.6309744119312577 | 0.7037640728395290 | T | T | T |
| 0.6446168746972788 | 0.9380276931693577 | 0.2847348097620446 | T | T | T |
| 0.6986085836547425 | 0.9343786492243423 | 0.1054868626855177 | T | T | T |
| 0.8020918159033001 | 0.9453312014525466 | 0.9798860155982524 | T | T | T |
| 0.9025114042364715 | 0.9288474352615376 | 0.1089773534091156 | T | T | T |
| 0.8983282994985082 | 0.9454198354909535 | 0.3063609824921413 | T | T | T |
| 0.7726357807932003 | 0.9666503092704644 | 0.2605641403895554 | T | T | T |
| 0.6396397512801923 | 0.1737942686734695 | 0.2477735024565435 | T | T | T |
| 0.6948927369963958 | 0.1545797241344450 | 0.0733725817427545 | T | T | T |
| 0.8090697490840228 | 0.1453991365627676 | 0.9748937695702711 | T | T | T |
| 0.9134438823799296 | 0.1673751647344601 | 0.0913766098117968 | T | T | T |
| 0.8955258826672865 | 0.1612810941973436 | 0.2885162939196806 | T | T | T |
| 0.7700555371808875 | 0.1470451355738902 | 0.2371089545153054 | T | T | T |
| 0.6799104920758918 | 0.0521913285993696 | 0.1979959690610816 | T | T | T |
| 0.9178984226176851 | 0.0497353302204625 | 0.1837450858046335 | T | T | T |
| 0.5694993020238192 | 0.8744689766355104 | 0.4170108670019306 | T | T | T |
| 0.5841787761880836 | 0.0057601006423833 | 0.4340092881437530 | T | T | T |
| 0.6000007885372872 | 0.1377703276187375 | 0.4302568244739888 | T | T | T |
| 0.8072772639844017 | 0.8699906235672720 | 0.3908003165106612 | T | T | T |
| 0.8167942063379068 | 0.9978703728681859 | 0.4425162624112858 | T | T | T |
| 0.8061933692529689 | 0.1315599988235170 | 0.4282244064526780 | T | T | T |
| 0.0122257450905095 | 0.9556466331185619 | 0.2158802804400345 | T | T | T |
| 0.0147967763502949 | 0.1377141814236571 | 0.2103328634948284 | T | T | T |
| 0.8585464847598633 | 0.0528503918614369 | 0.7814876951877070 | T | T | T |
| 0.8046392159543704 | 0.0712715745754382 | 0.6038826048776924 | T | T | T |
| 0.7014269608257396 | 0.0569658417331160 | 0.4789878364994808 | T | T | T |
| 0.5983119603839991 | 0.0750586499387353 | 0.6028403025588103 | T | T | T |
| 0.6045019823232846 | 0.0503139431743831 | 0.8000054168339484 | T | T | T |
| 0.7296434013920191 | 0.0299196728031074 | 0.7548376803415767 | T | T | T |
| 0.8599145506519926 | 0.8339648199292425 | 0.7599820015706376 | T | T | T |
| 0.8055101034854393 | 0.8315160523155701 | 0.5828430981912807 | T | T | T |

**Structure files (CONTCAR) involved in this work:**

|                    |                    |                    |   |   |   |
|--------------------|--------------------|--------------------|---|---|---|
| 0.6917979233456950 | 0.8511381115737783 | 0.4841977138158970 | T | T | T |
| 0.5878827536702230 | 0.8281726882631529 | 0.6024907670216841 | T | T | T |
| 0.6031264022145966 | 0.8540656961325170 | 0.7962615149136889 | T | T | T |
| 0.7296856711995395 | 0.8556326645679174 | 0.7414455838700095 | T | T | T |
| 0.8174810107448407 | 0.9471681449804661 | 0.6767700303030666 | T | T | T |
| 0.5775853281939599 | 0.9527737154742346 | 0.6676490192444838 | T | T | T |
| 0.9316148389690102 | 0.1268328893790071 | 0.9040816799294762 | T | T | T |
| 0.9201181518631663 | 0.9968902311294157 | 0.9392692675180644 | T | T | T |
| 0.9052192464200645 | 0.8645164205432725 | 0.9398562276633722 | T | T | T |
| 0.6949014662354687 | 0.1307584361268161 | 0.8776246480585791 | T | T | T |
| 0.6872745869765804 | 0.0049446255014827 | 0.9400283064075731 | T | T | T |
| 0.6970533383213861 | 0.8709693598398091 | 0.9339396292403609 | T | T | T |
| 0.4894014202540528 | 0.0484820678724477 | 0.7142065994712057 | T | T | T |
| 0.4838991814893128 | 0.8630791357216236 | 0.7139838670177148 | T | T | T |
| 0.3575066525886066 | 0.4330044962882217 | 0.7163522210293435 | T | T | T |
| 0.3086558965432589 | 0.4359432377064611 | 0.8997942360686654 | T | T | T |
| 0.1983821418767762 | 0.4585686128122624 | 0.0081297724201744 | T | T | T |
| 0.0880691637363962 | 0.4341847529915857 | 0.9019205750512930 | T | T | T |
| 0.1007136397020979 | 0.4370288750053606 | 0.7048632593030932 | T | T | T |
| 0.2279886329468788 | 0.4598786225586250 | 0.7492418323890668 | T | T | T |
| 0.3551051282007380 | 0.6733220876039284 | 0.7422193439455896 | T | T | T |
| 0.3055949174644385 | 0.6508273115407818 | 0.9183293799980438 | T | T | T |
| 0.1896067235546517 | 0.6448176895214269 | 0.0098438401174780 | T | T | T |
| 0.0857569336177405 | 0.6694943444703095 | 0.8905454306948393 | T | T | T |
| 0.1025322185367825 | 0.6579911969822562 | 0.6955373455080323 | T | T | T |
| 0.2267201641261758 | 0.6414303476768913 | 0.7582699805278847 | T | T | T |
| 0.3210550935362642 | 0.5493903195040597 | 0.7925591289740862 | T | T | T |
| 0.0796647626762184 | 0.5496213043041196 | 0.8063887090886886 | T | T | T |
| 0.4308573999762972 | 0.3757936069133765 | 0.5739295391948538 | T | T | T |
| 0.4140894860574701 | 0.5075469137639623 | 0.5710597850507187 | T | T | T |
| 0.3861606395348779 | 0.6381462577342398 | 0.5581363277202742 | T | T | T |
| 0.1948975902048764 | 0.3675796231065606 | 0.6155166908658255 | T | T | T |
| 0.1770082136325961 | 0.4982167557106378 | 0.5741643655371297 | T | T | T |
| 0.1970417805091587 | 0.6311300712874987 | 0.5629505571737806 | T | T | T |
| 0.9829807694137264 | 0.4576560298828947 | 0.7840204144943375 | T | T | T |
| 0.9824259478130677 | 0.6381797920299517 | 0.7729880070430757 | T | T | T |
| 0.1384820343562282 | 0.5660102316600961 | 0.2200286687291029 | T | T | T |
| 0.1859898602269643 | 0.5581615896216434 | 0.4004976097184722 | T | T | T |
| 0.2939060503701772 | 0.5451366432620751 | 0.5163731259262437 | T | T | T |
| 0.3973341829044743 | 0.5675169803425939 | 0.3959251076242339 | T | T | T |
| 0.3951829737374583 | 0.5592159913650339 | 0.2001870248439917 | T | T | T |
| 0.2682374501065998 | 0.5403640784181244 | 0.2482428571862507 | T | T | T |
| 0.1441598333696306 | 0.3216571093436510 | 0.2429351876270553 | T | T | T |
| 0.1916141571546447 | 0.3501113612659626 | 0.4209333911054343 | T | T | T |
| 0.3080063569627504 | 0.3535012489177772 | 0.5136645643917346 | T | T | T |
| 0.4085726275967112 | 0.3277663018425446 | 0.3895633088737842 | T | T | T |
| 0.3920283543995532 | 0.3416304774014104 | 0.1922985333230627 | T | T | T |
| 0.2712161808842057 | 0.3527311317992000 | 0.2632019132212488 | T | T | T |
| 0.1775988930365155 | 0.4471385976705675 | 0.2859676963732536 | T | T | T |
| 0.4084336039114173 | 0.4483847373400444 | 0.3097928385515417 | T | T | T |
| 0.0676702200940120 | 0.6231413652310944 | 0.0748954170558339 | T | T | T |
| 0.0786577772929499 | 0.4892299065808005 | 0.0813024119141667 | T | T | T |
| 0.1145970461687640 | 0.3612105721177408 | 0.0588463416445091 | T | T | T |

**Structure files (CONTCAR) involved in this work:**

|                    |                    |                    |   |   |   |
|--------------------|--------------------|--------------------|---|---|---|
| 0.3018558492158395 | 0.6317766966942262 | 0.1137304593115399 | T | T | T |
| 0.3149164838950833 | 0.5014645958921103 | 0.0701906240139557 | T | T | T |
| 0.2906990008026852 | 0.3690464695906037 | 0.0671408359720129 | T | T | T |
| 0.5078666578301296 | 0.5356592902974305 | 0.2955394639055573 | T | T | T |
| 0.5096056658334387 | 0.3634899583589975 | 0.2724841436165939 | T | T | T |
| 0.4365859008846338 | 0.7492888242675376 | 0.6353460585557962 | T | T | T |
| 0.1952086591001017 | 0.7492780613731670 | 0.6480684588463164 | T | T | T |
| 0.2706221470434728 | 0.7492251674643324 | 0.0422971621808566 | T | T | T |
| 0.1074435512351449 | 0.7472501387816243 | 0.0472208507277105 | T | T | T |
| 0.0699907736709117 | 0.2456776023582108 | 0.1241979516202802 | T | T | T |
| 0.3019825592676551 | 0.2483912846865300 | 0.1446892189458293 | T | T | T |
| 0.2262350456143068 | 0.2499984478817697 | 0.5431333949718633 | T | T | T |
| 0.3916778485869530 | 0.2507819963766573 | 0.5465608333115350 | T | T | T |
| 0.5570674781104712 | 0.2503813639770431 | 0.3521401981885577 | T | T | T |
| 0.8060069744146408 | 0.2526573014454040 | 0.3504984186285376 | T | T | T |
| 0.7273195513980355 | 0.2496541592229803 | 0.9414691932452958 | T | T | T |
| 0.8895454752670532 | 0.2492941253487723 | 0.9373958191596774 | T | T | T |
| 0.9452850777992636 | 0.7531438949146974 | 0.8556024319979655 | T | T | T |
| 0.6823147868938020 | 0.7537945734244690 | 0.8515929343346731 | T | T | T |
| 0.7729145217847138 | 0.7484832586485788 | 0.4394176908969097 | T | T | T |
| 0.6080946780606163 | 0.7496496539480559 | 0.4468334762438984 | T | T | T |
| 0.9361830739526432 | 0.5096867693355349 | 0.5210815897604802 | T | T | T |
| 0.9879968984033821 | 0.6645114322594996 | 0.3099627821796496 | T | T | T |
| 0.9329037485352850 | 0.4131782082634435 | 0.4302129242831421 | T | T | T |
| 0.8655626419879490 | 0.5635257579308798 | 0.5583699678482913 | T | T | T |
| 0.0014235457593018 | 0.6027085472781116 | 0.2568829185706643 | T | T | T |
| 0.9848478392976183 | 0.6181649339622087 | 0.4464732640195466 | T | T | T |
| 0.9521613543055462 | 0.7022796399606348 | 0.4458313595934363 | T | T | T |
| 0.0412841572779147 | 0.6879610856698504 | 0.4414257788131704 | T | T | T |
| 0.9949704181533793 | 0.7078190120948195 | 0.2776765049169742 | T | T | T |
| 1.0473218121813446 | 0.3552086263538402 | 0.4180967040472320 | T | T | T |
| 0.0477123030843920 | 0.4389210200699770 | 0.3703198968401510 | T | T | T |
| 0.9664691213805617 | 0.4988815483356456 | 0.5759200092284268 | T | T | T |
| 0.0516184823240734 | 0.4255671263667575 | 0.5020368189249097 | T | T | T |
| 0.9920796339595072 | 0.6693511403270473 | 0.4176962450893572 | T | T | T |
| 1.0303022682173104 | 0.4067317176782637 | 0.4318900619007220 | T | T | T |

**Figure S10 Ga-IS**

Si Al O Ga H C

1.0000000000000000

20.0219999999999985 0.0000000000000000 0.0000000000000000

0.0000000000000000 19.8990000000000009 0.0000000000000000

0.0000000000000000 0.0000000000000000 13.3829999999999991

93 3 193 1 10 2

Selective dynamics

Direct

|                    |                    |                    |   |   |   |
|--------------------|--------------------|--------------------|---|---|---|
| 0.4218904926815678 | 0.0580784327121771 | 0.6483674519103902 | T | T | T |
| 0.3020928374189639 | 0.0275936466564866 | 0.7905718785742857 | T | T | T |
| 0.2800084127865840 | 0.0598595685794682 | 0.0142149900569832 | T | T | T |
| 0.1199163156334771 | 0.0633925368086919 | 0.0126051156247718 | T | T | T |
| 0.0664862583101500 | 0.0297476903114489 | 0.7989050322213752 | T | T | T |
| 0.1773139738325343 | 0.0567936976794408 | 0.6541272767171161 | T | T | T |
| 0.4199060666745488 | 0.8273975621457785 | 0.6718815705035939 | T | T | T |
| 0.3025872576341873 | 0.8690391242734775 | 0.8104619753648097 | T | T | T |

**Structure files (CONTCAR) involved in this work:**

|                    |                    |                    |   |   |   |
|--------------------|--------------------|--------------------|---|---|---|
| 0.2670125705227641 | 0.8288894560746409 | 0.0299898595916506 | T | T | T |
| 0.1119630392289832 | 0.8268596030897806 | 0.0169197552128312 | T | T | T |
| 0.0614991832723283 | 0.8703617127383672 | 0.8020190925251670 | T | T | T |
| 0.1802024970652717 | 0.8275782319166216 | 0.6755090578634274 | T | T | T |
| 0.0758165366662951 | 0.9425723181806047 | 0.1513568758930205 | T | T | T |
| 0.1957246065291598 | 0.9720666302661797 | 0.2947701301102708 | T | T | T |
| 0.2171303809424102 | 0.9370520282555812 | 0.5159873269773322 | T | T | T |
| 0.3771444723379392 | 0.9338931220550644 | 0.5160360696433280 | T | T | T |
| 0.4313578461350996 | 0.9689426113291245 | 0.3048881215572566 | T | T | T |
| 0.3203416234770994 | 0.9435302904199815 | 0.1589108420558693 | T | T | T |
| 0.0790119455014203 | 0.1727498506880799 | 0.1649935727223961 | T | T | T |
| 0.1958561741797572 | 0.1299363708398295 | 0.3075071340122005 | T | T | T |
| 0.2312187832586262 | 0.1728542027806719 | 0.5244961513568931 | T | T | T |
| 0.3858595363594683 | 0.1741140028989072 | 0.5112771436165552 | T | T | T |
| 0.4369873149158238 | 0.1271447207891292 | 0.3014880845662436 | T | T | T |
| 0.3187839851009165 | 0.1674889720728551 | 0.1724479948950482 | T | T | T |
| 0.5832075848468530 | 0.5565855528104384 | 0.3462680436259136 | T | T | T |
| 0.6956592876543313 | 0.5304566759870789 | 0.1865817296748412 | T | T | T |
| 0.7127899663533371 | 0.5646908061313511 | 0.9720498766942495 | T | T | T |
| 0.8714019702455880 | 0.5590931230417781 | 0.9742994600845752 | T | T | T |
| 0.9338235953041373 | 0.5291799826220092 | 0.1867215617806524 | T | T | T |
| 0.5773634676217223 | 0.3287240828981117 | 0.3290099482876200 | T | T | T |
| 0.7056092599971057 | 0.3739943737745688 | 0.2102809370768918 | T | T | T |
| 0.7352960275183875 | 0.3291546280805775 | 0.9905331679716030 | T | T | T |
| 0.8865346951432889 | 0.3278541506335934 | 0.9799792750678106 | T | T | T |
| 0.9361800503071537 | 0.3717979052241185 | 0.1975198910825068 | T | T | T |
| 0.9257719011868496 | 0.4364774367720525 | 0.8375624287074137 | T | T | T |
| 0.7802472664365425 | 0.4410190685364541 | 0.4771938252585166 | T | T | T |
| 0.6205508127727728 | 0.4326763612551094 | 0.4887751580781537 | T | T | T |
| 0.5662965811072612 | 0.4658814626504609 | 0.7048834505571024 | T | T | T |
| 0.6727278954499261 | 0.4347527583964959 | 0.8511573614633088 | T | T | T |
| 0.9179548848642146 | 0.6722023622873625 | 0.8275019637842491 | T | T | T |
| 0.7998252727944882 | 0.6328839321954279 | 0.6960123448962976 | T | T | T |
| 0.7679753636986998 | 0.6684063720080106 | 0.4789007653570387 | T | T | T |
| 0.6118512860064549 | 0.6708849605070725 | 0.4850126812116543 | T | T | T |
| 0.5637514757077414 | 0.6245689522393391 | 0.7022897441558985 | T | T | T |
| 0.6809278418346666 | 0.6809881662888241 | 0.8230537697745205 | T | T | T |
| 0.5757650520165223 | 0.9436024844648808 | 0.3636189141701561 | T | T | T |
| 0.6949868646756894 | 0.9722908038875939 | 0.2192124945565840 | T | T | T |
| 0.7184782563180870 | 0.9425261232098915 | 0.9971143400114016 | T | T | T |
| 0.8785847209905849 | 0.9342576479677246 | 0.9948134581989730 | T | T | T |
| 0.9317403786361832 | 0.9692225322018593 | 0.2067888177277560 | T | T | T |
| 0.8198022078774965 | 0.9386342729038273 | 0.3519371617995470 | T | T | T |
| 0.5811398063271948 | 0.1742251216990051 | 0.3332667869223073 | T | T | T |
| 0.6986277427109155 | 0.1304457034855893 | 0.1983010490882254 | T | T | T |
| 0.7323244534093440 | 0.1720969624862468 | 0.9776495508434626 | T | T | T |
| 0.8867521840788964 | 0.1731509112302131 | 0.9934451053510096 | T | T | T |
| 0.9348305672477298 | 0.1280494547048677 | 0.2058675936892480 | T | T | T |
| 0.8194133053473330 | 0.1685240752568122 | 0.3386835344707639 | T | T | T |
| 0.9232576000641207 | 0.0578822476217220 | 0.8605416013630354 | T | T | T |
| 0.8048370092608699 | 0.0294087898254357 | 0.7206535273733997 | T | T | T |
| 0.7812115745810111 | 0.0563172575454610 | 0.4951553084835343 | T | T | T |
| 0.6211917281321303 | 0.0679692335694033 | 0.4936284261402816 | T | T | T |

**Structure files (CONTCAR) involved in this work:**

|                    |                    |                    |   |   |   |
|--------------------|--------------------|--------------------|---|---|---|
| 0.5668221638235026 | 0.0338208816469476 | 0.7020001911594904 | T | T | T |
| 0.6781992860091433 | 0.0584778517500476 | 0.8507824219584315 | T | T | T |
| 0.9171907152742937 | 0.8249085957253280 | 0.8388071217126623 | T | T | T |
| 0.8025136328739152 | 0.8735464655515536 | 0.7037478567825273 | T | T | T |
| 0.7676923745348296 | 0.8298163951827576 | 0.4872335050132376 | T | T | T |
| 0.6123316353565051 | 0.8263309681678216 | 0.4974467913107027 | T | T | T |
| 0.5621974182313846 | 0.8770943050213886 | 0.7037657839576347 | T | T | T |
| 0.6777993472164112 | 0.8376290103147296 | 0.8360598854910489 | T | T | T |
| 0.4214926060800591 | 0.4444017667835723 | 0.6411762026254944 | T | T | T |
| 0.3053328641092629 | 0.4720653733977638 | 0.7908457955379402 | T | T | T |
| 0.2836409458994434 | 0.4349332500137820 | 0.0100470263422091 | T | T | T |
| 0.1262003553350429 | 0.4326152510109816 | 0.0035913914259572 | T | T | T |
| 0.0733531207414555 | 0.4719923660705777 | 0.7960606600427054 | T | T | T |
| 0.1837109895321370 | 0.4485475333854435 | 0.6502787490768398 | T | T | T |
| 0.4233707101712313 | 0.6728489276723943 | 0.6646447505731221 | T | T | T |
| 0.3028456538734083 | 0.6291207899251196 | 0.8003596101963414 | T | T | T |
| 0.2689132685109520 | 0.6717662513023254 | 0.0193053700599323 | T | T | T |
| 0.1147316514040845 | 0.6738236345693021 | 0.0074353422952018 | T | T | T |
| 0.0652569369676987 | 0.6292690894739205 | 0.7985269604473717 | T | T | T |
| 0.1805193812961291 | 0.6688088362827342 | 0.6648668412707660 | T | T | T |
| 0.0785206888829298 | 0.5542069147994932 | 0.1349081175503700 | T | T | T |
| 0.1980629946599168 | 0.5282749285539927 | 0.2822498440594181 | T | T | T |
| 0.2213671285932832 | 0.5671254231668604 | 0.5024712005643275 | T | T | T |
| 0.3830289512722114 | 0.5706225351988937 | 0.5041846050506495 | T | T | T |
| 0.4365883573530052 | 0.5284991762746327 | 0.2950707101855981 | T | T | T |
| 0.3259110432074353 | 0.5542291187068472 | 0.1486948389289174 | T | T | T |
| 0.0818074321163389 | 0.3273753195029298 | 0.1578771582427765 | T | T | T |
| 0.1955833617442235 | 0.3693999119039298 | 0.3049510279289576 | T | T | T |
| 0.2317983478603383 | 0.3303592113727894 | 0.5232136430502405 | T | T | T |
| 0.3861088435350851 | 0.3275604359510073 | 0.5062422007017359 | T | T | T |
| 0.4342940379250223 | 0.3709877442017365 | 0.2929541635177507 | T | T | T |
| 0.3160413177666952 | 0.3262638363616462 | 0.1684655716095230 | T | T | T |
| 0.8117442124490095 | 0.5655965242100142 | 0.3234267062067930 | T | T | T |
| 0.8277131714804589 | 0.3273212119088740 | 0.3474266659321639 | T | T | T |
| 0.7961342821917412 | 0.4735777647631739 | 0.7225485127517464 | T | T | T |
| 0.3563294586612608 | 0.0640375839973692 | 0.7190534981813845 | T | T | T |
| 0.3030256566760589 | 0.0644438885329862 | 0.8984705093805492 | T | T | T |
| 0.1996294954729503 | 0.0507096404372722 | 0.0238372977104002 | T | T | T |
| 0.0985502830644048 | 0.0662222404924115 | 0.8962451033067449 | T | T | T |
| 0.1019789130566726 | 0.0585081167319761 | 0.6986326902546174 | T | T | T |
| 0.2278800516466004 | 0.0347528250831014 | 0.7432324891645220 | T | T | T |
| 0.3580545484541271 | 0.8259508955201843 | 0.7502363024407660 | T | T | T |
| 0.3052267173058968 | 0.8461922602206418 | 0.9263760641873729 | T | T | T |
| 0.1892618882250273 | 0.8522647577953414 | 0.0201503930275058 | T | T | T |
| 0.0837594076753176 | 0.8327420124112771 | 0.9041489358713518 | T | T | T |
| 0.1023959166946577 | 0.8372609188250446 | 0.7086314038041741 | T | T | T |
| 0.2282706303696137 | 0.8542205127465482 | 0.7655241988540855 | T | T | T |
| 0.3204326102531657 | 0.9483347766444139 | 0.8008372579289204 | T | T | T |
| 0.0796019740012065 | 0.9494671751871908 | 0.8090976853731791 | T | T | T |
| 0.4301318641723055 | 0.1271938866306079 | 0.5847859680815551 | T | T | T |
| 0.4160383589112345 | 0.9950977006911819 | 0.5712864199763561 | T | T | T |
| 0.3964042078731891 | 0.8628879258600897 | 0.5682612180411043 | T | T | T |
| 0.1952457144232535 | 0.1312995796504781 | 0.6134156953938851 | T | T | T |

**Structure files (CONTCAR) involved in this work:**

|                    |                    |                    |   |   |   |
|--------------------|--------------------|--------------------|---|---|---|
| 0.1805567661366958 | 0.0024679985065662 | 0.5636130261187277 | T | T | T |
| 0.1947072615488299 | 0.8684892737411514 | 0.5728129526334361 | T | T | T |
| 0.9874389553861530 | 0.0460513530151750 | 0.7885600732305658 | T | T | T |
| 0.9816726723889276 | 0.8603088908677766 | 0.7854337879630473 | T | T | T |
| 0.1422168429478484 | 0.9374638006687867 | 0.2201954949848272 | T | T | T |
| 0.1943104811541421 | 0.9314203966782080 | 0.3999982833233263 | T | T | T |
| 0.2973346276518381 | 0.9471566843834091 | 0.5254762822377830 | T | T | T |
| 0.3993196584758649 | 0.9294339007256336 | 0.3999357589206493 | T | T | T |
| 0.3958402476767203 | 0.9434037247502798 | 0.2025709642950934 | T | T | T |
| 0.2702489924459214 | 0.9672989377737767 | 0.2477781086804375 | T | T | T |
| 0.1421374073414402 | 0.1708080756133513 | 0.2408441896466780 | T | T | T |
| 0.1927321608646171 | 0.1603106796423293 | 0.4195928883022758 | T | T | T |
| 0.3085055395475058 | 0.1484124626648307 | 0.5140128563078900 | T | T | T |
| 0.4139685935608953 | 0.1705496234187258 | 0.3981518511098643 | T | T | T |
| 0.3963557298731862 | 0.1548741798442074 | 0.2041701349848643 | T | T | T |
| 0.2706947223750831 | 0.1395376942784796 | 0.2618421991718025 | T | T | T |
| 0.1764015342144413 | 0.0506753688636918 | 0.3104145369661365 | T | T | T |
| 0.4184891309276601 | 0.0488559702361046 | 0.3208646821911740 | T | T | T |
| 0.0669190749518590 | 0.8715788748007206 | 0.0924308253443386 | T | T | T |
| 0.0811128785475306 | 0.0025661529634173 | 0.0691498379863565 | T | T | T |
| 0.0988364783122436 | 0.1346961699864502 | 0.0618154604138379 | T | T | T |
| 0.3019535685866542 | 0.8680809623603698 | 0.1221672468179917 | T | T | T |
| 0.3157806134787463 | 0.9949175987652834 | 0.0647671822786002 | T | T | T |
| 0.3028587773693470 | 0.1288663283057495 | 0.0685226123886132 | T | T | T |
| 0.5103585192379234 | 0.9530667060178651 | 0.2933820096401026 | T | T | T |
| 0.5168461045717623 | 0.1357601644692869 | 0.2841031537729625 | T | T | T |
| 0.6460747107604398 | 0.5616160246394948 | 0.2716202002371397 | T | T | T |
| 0.6767661063682467 | 0.5661678281010099 | 0.0804161077559259 | T | T | T |
| 0.7921229896918683 | 0.5473030380594053 | 0.9850413130849978 | T | T | T |
| 0.9080168512629725 | 0.5606525448673012 | 0.0829308252823678 | T | T | T |
| 0.8997306241386660 | 0.5687956888850388 | 0.2845110260301965 | T | T | T |
| 0.7718194392896471 | 0.5476891994980480 | 0.2135376782455735 | T | T | T |
| 0.6410334905458523 | 0.3348524231472235 | 0.2564245801903143 | T | T | T |
| 0.7267977135103952 | 0.3319909876363433 | 0.1104669866069332 | T | T | T |
| 0.8106780540338880 | 0.3552467431205716 | 0.9611624950222766 | T | T | T |
| 0.9086240318702121 | 0.3379384228216393 | 0.0947461026803570 | T | T | T |
| 0.9063722245161311 | 0.3364161390915033 | 0.2945972387882363 | T | T | T |
| 0.7663307019350065 | 0.3749277133632570 | 0.2886940906437312 | T | T | T |
| 0.6825110425223959 | 0.4495889892005620 | 0.1783124054395281 | T | T | T |
| 0.9147531157794194 | 0.4513433530597802 | 0.1953444016155733 | T | T | T |
| 0.5708630139885055 | 0.6285673030366349 | 0.4009702541814518 | T | T | T |
| 0.5968779084955648 | 0.5010851384167994 | 0.4335004279972292 | T | T | T |
| 0.5887644506183036 | 0.3676356109277381 | 0.4345148206764878 | T | T | T |
| 0.8022324000805072 | 0.6431471643372245 | 0.3779106434062526 | T | T | T |
| 0.8026989707236923 | 0.5011378689159965 | 0.4086594795976249 | T | T | T |
| 0.8279963424454360 | 0.3717281904428359 | 0.4677142310113097 | T | T | T |
| 0.0129043407187935 | 0.5442208737944468 | 0.2054173612145052 | T | T | T |
| 0.0177887655749593 | 0.3697222804782296 | 0.1968169795751652 | T | T | T |
| 0.8713255248121284 | 0.4253573605592156 | 0.7464041808284753 | T | T | T |
| 0.8104656449200185 | 0.4553650469696590 | 0.5930868307756892 | T | T | T |
| 0.7016589528840524 | 0.4265387404923885 | 0.4865653496308869 | T | T | T |
| 0.5957198476047735 | 0.4326125050490121 | 0.6033495787769091 | T | T | T |
| 0.598430787754897  | 0.4289077966183402 | 0.8015047869173400 | T | T | T |

**Structure files (CONTCAR) involved in this work:**

|                    |                    |                    |   |   |   |
|--------------------|--------------------|--------------------|---|---|---|
| 0.7291988251991695 | 0.4295084184942424 | 0.7657509642743894 | T | T | T |
| 0.8635883012641912 | 0.6754913299172256 | 0.7382749684495761 | T | T | T |
| 0.8054360701672190 | 0.6336777153436898 | 0.5748499939952313 | T | T | T |
| 0.6892758711031289 | 0.6469121244731885 | 0.4847433838425600 | T | T | T |
| 0.5801118218617681 | 0.6575269175788970 | 0.5944787537223120 | T | T | T |
| 0.6046770379631136 | 0.6628949642903575 | 0.7902702684478480 | T | T | T |
| 0.7300436123280380 | 0.6701278515395748 | 0.7271512303048046 | T | T | T |
| 0.8020820418584781 | 0.5580777168536804 | 0.7419937060768282 | T | T | T |
| 0.5841484161602580 | 0.5456922837512088 | 0.7036100679351371 | T | T | T |
| 0.9356436002000774 | 0.3691129871257186 | 0.9040073865456030 | T | T | T |
| 0.9021276998902584 | 0.4975251352147248 | 0.9087356454334133 | T | T | T |
| 0.8894272189512948 | 0.6302142421159578 | 0.9222397293291416 | T | T | T |
| 0.6804825662419374 | 0.3751182797775814 | 0.9337771459501479 | T | T | T |
| 0.6769498706684537 | 0.5078914359913013 | 0.9047983583301817 | T | T | T |
| 0.7049287773819283 | 0.6372338955112083 | 0.9184741824359501 | T | T | T |
| 0.4859861415777377 | 0.4555690031857120 | 0.7116624614619314 | T | T | T |
| 0.4837296946865349 | 0.6337000043309664 | 0.7219925196695889 | T | T | T |
| 0.6412521232232041 | 0.9370844088091906 | 0.2930785575904268 | T | T | T |
| 0.6916000120084429 | 0.9361275786895885 | 0.1108148969635217 | T | T | T |
| 0.7992233106326837 | 0.9501338879202968 | 0.9928343073339144 | T | T | T |
| 0.9045527967217896 | 0.9289249270895985 | 0.1091950525702734 | T | T | T |
| 0.8952643964758062 | 0.9415161598035442 | 0.3071701245040955 | T | T | T |
| 0.7698595607307924 | 0.9625454855247665 | 0.2631455073435123 | T | T | T |
| 0.6422297458270985 | 0.1747701651753046 | 0.2544048378910672 | T | T | T |
| 0.6967600812224937 | 0.1523469911444305 | 0.0820471709975367 | T | T | T |
| 0.8099725271527204 | 0.1473401901759425 | 0.9829509443559427 | T | T | T |
| 0.9102048771383433 | 0.1710111993599970 | 0.1091719966926847 | T | T | T |
| 0.8971669073750679 | 0.1557302139381570 | 0.3046423483078929 | T | T | T |
| 0.7721431832564984 | 0.1428788230332700 | 0.2457509158281320 | T | T | T |
| 0.6780849819119275 | 0.0516722823540250 | 0.2094014959391965 | T | T | T |
| 0.9178830467412705 | 0.0488351871240759 | 0.1893577587019981 | T | T | T |
| 0.5665896710208166 | 0.8749743306339272 | 0.4281062316376683 | T | T | T |
| 0.5807023249609172 | 0.0069828924963367 | 0.4399808391383654 | T | T | T |
| 0.6045881305700694 | 0.1378531031576061 | 0.4363493457066709 | T | T | T |
| 0.8029402238887065 | 0.8623953684683932 | 0.3886061995328462 | T | T | T |
| 0.8134102243067377 | 0.9886410559388810 | 0.4472581802573516 | T | T | T |
| 0.8055921778890910 | 0.1226162939915544 | 0.4371102775481753 | T | T | T |
| 0.0112333567878755 | 0.9551492389595669 | 0.2218816169669892 | T | T | T |
| 0.0152789800789369 | 0.1375042745283945 | 0.2190740988493101 | T | T | T |
| 0.8572750796613247 | 0.0690795287909262 | 0.7918908734671916 | T | T | T |
| 0.8073637734061162 | 0.0614967033009161 | 0.6097305928057822 | T | T | T |
| 0.7002573069525914 | 0.0505678651801689 | 0.4902475729850990 | T | T | T |
| 0.5966842546098980 | 0.0767361535745265 | 0.6086552268355663 | T | T | T |
| 0.6029595117340288 | 0.0551077932725059 | 0.8058916776115772 | T | T | T |
| 0.7291082509252103 | 0.0360607329755232 | 0.7623274106643826 | T | T | T |
| 0.8549121674712907 | 0.8250468483863074 | 0.7613707477571113 | T | T | T |
| 0.8055812006127954 | 0.8585491659200905 | 0.5854513462552765 | T | T | T |
| 0.6894079106556905 | 0.8519753822234094 | 0.4908941534624621 | T | T | T |
| 0.5867533443907845 | 0.8290944817099175 | 0.6126473159667076 | T | T | T |
| 0.6012297223281691 | 0.8560317875324687 | 0.8055210722206102 | T | T | T |
| 0.7270767769362221 | 0.8612255187719211 | 0.7452837595713387 | T | T | T |
| 0.8261026475815788 | 0.9506155463487100 | 0.7225574531182034 | T | T | T |
| 0.5789134062505165 | 0.9547500084072071 | 0.6765388009761129 | T | T | T |

**Structure files (CONTCAR) involved in this work:**

|                    |                    |                    |   |   |   |
|--------------------|--------------------|--------------------|---|---|---|
| 0.9351171972830985 | 0.1254013473707410 | 0.9265761594753246 | T | T | T |
| 0.9170189640783823 | 0.9941990334927114 | 0.9359445321349789 | T | T | T |
| 0.8962285577821554 | 0.8630701554629858 | 0.9414118599258768 | T | T | T |
| 0.6943109585112576 | 0.1346758834719836 | 0.8861014149944620 | T | T | T |
| 0.6847443269319853 | 0.0083655162055596 | 0.9461256857369469 | T | T | T |
| 0.6968961355742640 | 0.8746836191026800 | 0.9394750451236150 | T | T | T |
| 0.4876470902397366 | 0.0486621463368456 | 0.7175250125152519 | T | T | T |
| 0.4822868402751407 | 0.8677835543809919 | 0.7217070177277981 | T | T | T |
| 0.3560494141839460 | 0.4377225006035944 | 0.7119948176662695 | T | T | T |
| 0.3079508934875589 | 0.4299485629635651 | 0.8946016524371759 | T | T | T |
| 0.2042923134130321 | 0.4528948435325250 | 0.0152783953385234 | T | T | T |
| 0.1054712034949628 | 0.4280415623830030 | 0.8864329113030897 | T | T | T |
| 0.1068462489188827 | 0.4531152392737827 | 0.6890873608903141 | T | T | T |
| 0.2303207893835624 | 0.4691050026510889 | 0.7445928820615813 | T | T | T |
| 0.3565490657205859 | 0.6684902633390223 | 0.7325420729013047 | T | T | T |
| 0.3021053536183923 | 0.6641195019412078 | 0.9094342038185872 | T | T | T |
| 0.1913586361671714 | 0.6468940396137287 | 0.0141827195660531 | T | T | T |
| 0.0906182347439839 | 0.6748503653965028 | 0.8916782935135403 | T | T | T |
| 0.1031241786998481 | 0.6544122735205846 | 0.6972734421902930 | T | T | T |
| 0.2291900486674953 | 0.6349864671194977 | 0.7486616471956654 | T | T | T |
| 0.3240141774331844 | 0.5505081210622507 | 0.8107285364245767 | T | T | T |
| 0.0833617212997331 | 0.5511427912983496 | 0.8217668167098382 | T | T | T |
| 0.4310114091545709 | 0.3758380132122745 | 0.5770244561321201 | T | T | T |
| 0.4135638485885982 | 0.5068296526520545 | 0.5640416592245004 | T | T | T |
| 0.4082732788219205 | 0.6397459759259790 | 0.5558498322093767 | T | T | T |
| 0.1980351244281661 | 0.3723332334279769 | 0.6140662346531255 | T | T | T |
| 0.1935175562274807 | 0.4997020125437324 | 0.5569378541831105 | T | T | T |
| 0.1926781958249962 | 0.6345225803629019 | 0.5560156980497354 | T | T | T |
| 0.9949586089725723 | 0.4544308809599110 | 0.7813379462959472 | T | T | T |
| 0.9853714984826523 | 0.6369544638303464 | 0.7824904964815502 | T | T | T |
| 0.1430704837345363 | 0.5612839240681839 | 0.2074296011803973 | T | T | T |
| 0.1930441077322202 | 0.5677855008193849 | 0.3884719111078170 | T | T | T |
| 0.3020032235638231 | 0.5664903616312480 | 0.5059817349904564 | T | T | T |
| 0.4094216534951406 | 0.5709066035642717 | 0.3903554770532424 | T | T | T |
| 0.4005839774427851 | 0.5576681768452643 | 0.1951127293074010 | T | T | T |
| 0.2726409402984556 | 0.5369811162307692 | 0.2374032734328918 | T | T | T |
| 0.1391365885468897 | 0.3289165832666607 | 0.2434223499971820 | T | T | T |
| 0.1912774465957584 | 0.3453572302454014 | 0.4203988090335612 | T | T | T |
| 0.3089594334062660 | 0.3539882956277224 | 0.5089344648355347 | T | T | T |
| 0.4127166770099804 | 0.3290814822196759 | 0.3920842941049710 | T | T | T |
| 0.3932585449575992 | 0.3423286878144187 | 0.1969439074560231 | T | T | T |
| 0.2693081614371651 | 0.3538244827333081 | 0.2597027993882075 | T | T | T |
| 0.1802500139411183 | 0.4495180731966668 | 0.2975333506300440 | T | T | T |
| 0.4166843287090138 | 0.4498828559501593 | 0.3105491675273891 | T | T | T |
| 0.0680996540806821 | 0.6233925237375144 | 0.0725768050958725 | T | T | T |
| 0.0826762006738321 | 0.4912954768913346 | 0.0581215417957904 | T | T | T |
| 0.1108930544580830 | 0.3604886696932569 | 0.0550097648143666 | T | T | T |
| 0.3088909083261349 | 0.6266719520134919 | 0.0999162684353147 | T | T | T |
| 0.3240305198208084 | 0.4953198093171438 | 0.0646522216493743 | T | T | T |
| 0.2968432500711058 | 0.3631842579852373 | 0.0639326571038055 | T | T | T |
| 0.5165939003220896 | 0.5368889244092844 | 0.2830565865507753 | T | T | T |
| 0.5132140854918396 | 0.3610945535776354 | 0.2711219540476000 | T | T | T |
| 0.4422655960444702 | 0.7510189170138939 | 0.6467363763010082 | T | T | T |



**Structure files (CONTCAR) involved in this work:**

|                    |                    |                    |   |   |   |
|--------------------|--------------------|--------------------|---|---|---|
| 0.1945325464801320 | 0.7485490468174559 | 0.6542012518906347 | T | T | T |
| 0.2724290557765860 | 0.7493641722939707 | 0.0546487197595271 | T | T | T |
| 0.1077994403061115 | 0.7489097397950836 | 0.0529194253094317 | T | T | T |
| 0.0616588790053692 | 0.2500041480827198 | 0.1358341934967224 | T | T | T |
| 0.3046731538517922 | 0.2465655948784942 | 0.1532976140335993 | T | T | T |
| 0.2270059351975049 | 0.2518241775658469 | 0.5531387027844479 | T | T | T |
| 0.3905451123941350 | 0.2514564731915805 | 0.5491842090553677 | T | T | T |
| 0.5612587198320638 | 0.2512418929370571 | 0.3579947341442968 | T | T | T |
| 0.8059166911530299 | 0.2450368214868758 | 0.3670981524792934 | T | T | T |
| 0.7273683455254579 | 0.2516964159156215 | 0.9545902469136015 | T | T | T |
| 0.8928861217445078 | 0.2491749052804521 | 0.9509060586891790 | T | T | T |
| 0.9354698239714512 | 0.7474919273830626 | 0.8662580151873503 | T | T | T |
| 0.6847720741239400 | 0.7584473706080355 | 0.8578243785475712 | T | T | T |
| 0.7750485008053778 | 0.7494947952257230 | 0.4860598316069760 | T | T | T |
| 0.6053144007286032 | 0.7499632797900304 | 0.4571624233616297 | T | T | T |
| 0.9833661640890605 | 0.6409613291567756 | 0.3749070946929665 | T | T | T |
| 0.8784436651517580 | 0.3878056911931602 | 0.5978506339849755 | T | T | T |
| 0.9372362328377019 | 0.3384612201136968 | 0.6057171601507649 | T | T | T |
| 0.9323026730827237 | 0.5998166455845794 | 0.3255479260502082 | T | T | T |
| 0.9902175536216170 | 0.6315387762442284 | 0.5321564604013207 | T | T | T |
| 0.9314727878568140 | 0.6911976640731948 | 0.4838741683959211 | T | T | T |
| 0.0191127751140131 | 0.7097690547316712 | 0.4804485203220785 | T | T | T |
| 1.0282208543901106 | 0.6255248256893576 | 0.3585449773551794 | T | T | T |
| 0.9406618480966150 | 0.4587783674108030 | 0.4542374784756827 | T | T | T |
| 0.0055982007915858 | 0.5180659079034037 | 0.4681066187491437 | T | T | T |
| 0.9559413134280964 | 0.4996366175019433 | 0.5741694549410054 | T | T | T |
| 1.0142616378344251 | 0.4382285473274418 | 0.5271314695049831 | T | T | T |
| 0.9814587666795896 | 0.6698236783818551 | 0.4743309407395034 | T | T | T |
| 0.9786121839708620 | 0.4776626045175166 | 0.5066882728852795 | T | T | T |

**Figure S10 Ga-TS**

Si Al O Ga H C

1.0000000000000000

20.0219999999999985 0.0000000000000000 0.0000000000000000

0.0000000000000000 19.8990000000000009 0.0000000000000000

0.0000000000000000 0.0000000000000000 13.3829999999999991

93 3 193 1 10 2

Selective dynamics

Direct

|                    |                    |                    |   |   |   |
|--------------------|--------------------|--------------------|---|---|---|
| 0.4217213175552045 | 0.0572682262932821 | 0.6475733297733702 | T | T | T |
| 0.3010491241212284 | 0.0268317302946554 | 0.7893277220416670 | T | T | T |
| 0.2796556080356864 | 0.0604776914823235 | 0.0125289716062042 | T | T | T |
| 0.1199483663308637 | 0.0631757870742186 | 0.0118776798588476 | T | T | T |
| 0.0672309121884154 | 0.0295738304162490 | 0.7988730509552632 | T | T | T |
| 0.1765751994466780 | 0.0558762480765670 | 0.6510278713357595 | T | T | T |
| 0.4197597100403510 | 0.8272082424577262 | 0.6707679774014407 | T | T | T |
| 0.3017880737399702 | 0.8684146013159759 | 0.8095933698155422 | T | T | T |
| 0.2667816288065412 | 0.8283035639201765 | 0.0298259082628708 | T | T | T |
| 0.1116606577300224 | 0.8263198957087535 | 0.0176660072943202 | T | T | T |
| 0.0617372994627813 | 0.8704643916289496 | 0.8027732861708048 | T | T | T |
| 0.1792337986767195 | 0.8277755237873768 | 0.6734583739671398 | T | T | T |
| 0.0753398418558046 | 0.9428715400595645 | 0.1501391252562716 | T | T | T |
| 0.1960863151012057 | 0.9728910996440704 | 0.2930493608508070 | T | T | T |
| 0.2168784111046778 | 0.9367565804721844 | 0.5139897062368318 | T | T | T |

**Structure files (CONTCAR) involved in this work:**

|                    |                    |                    |   |   |   |
|--------------------|--------------------|--------------------|---|---|---|
| 0.3766474897380438 | 0.9335863168568899 | 0.5151944747212480 | T | T | T |
| 0.4303292920583729 | 0.9692980656506478 | 0.3041361377645159 | T | T | T |
| 0.3205179206512269 | 0.9447823788595728 | 0.1554535037770755 | T | T | T |
| 0.0781737968132245 | 0.1727668842924029 | 0.1640964812172678 | T | T | T |
| 0.1954017056816356 | 0.1302535796648498 | 0.3070930658619967 | T | T | T |
| 0.2307288340638823 | 0.1730586666835599 | 0.5240110111689029 | T | T | T |
| 0.3852980553291945 | 0.1738833270786884 | 0.5116356745583774 | T | T | T |
| 0.4362497601083153 | 0.1275393129834139 | 0.3013933919995091 | T | T | T |
| 0.3182882812769634 | 0.1676019712779550 | 0.1713038464739674 | T | T | T |
| 0.5828714248547410 | 0.5549053314460448 | 0.3507433050658175 | T | T | T |
| 0.6967899539505134 | 0.5288986757786093 | 0.1907473325111651 | T | T | T |
| 0.7138918734678155 | 0.5657981031350828 | 0.9770842745416178 | T | T | T |
| 0.8723415530291920 | 0.5622247125192079 | 0.9815333686063653 | T | T | T |
| 0.9323518543260060 | 0.5295958432723790 | 0.1905326756178542 | T | T | T |
| 0.5757212223533975 | 0.3299857174900354 | 0.3331846428091277 | T | T | T |
| 0.7037567446446872 | 0.3742907902073166 | 0.2070402486196129 | T | T | T |
| 0.7310083530802858 | 0.3269281050529563 | 0.9915309854686496 | T | T | T |
| 0.8829676580320389 | 0.3273964461790654 | 0.9797380028080543 | T | T | T |
| 0.9373574732022180 | 0.3720161193835058 | 0.1926480242693105 | T | T | T |
| 0.9280270708883931 | 0.4414249188472280 | 0.8470050914179440 | T | T | T |
| 0.7791742228447064 | 0.4390916458220801 | 0.4839154232971086 | T | T | T |
| 0.6212566066916887 | 0.4304771815790511 | 0.4906967875143314 | T | T | T |
| 0.5690529623456594 | 0.4672205394065470 | 0.7050724792724576 | T | T | T |
| 0.6699600555471997 | 0.4364693309831207 | 0.8609977961746680 | T | T | T |
| 0.9182943754583210 | 0.6728395091579604 | 0.8301606617530373 | T | T | T |
| 0.7996256504833649 | 0.6361285667709231 | 0.6940472869800917 | T | T | T |
| 0.7688034155180413 | 0.6713265894503675 | 0.4762482837630131 | T | T | T |
| 0.6133238042315816 | 0.6715202852268646 | 0.4854718390997639 | T | T | T |
| 0.5650490518174724 | 0.6256784666039266 | 0.7022159706117552 | T | T | T |
| 0.6815391690364172 | 0.6813719608158847 | 0.8239100752826471 | T | T | T |
| 0.5749131917124565 | 0.9436788074176996 | 0.3640414555252499 | T | T | T |
| 0.6939197314399540 | 0.9733175445543459 | 0.2198401536396522 | T | T | T |
| 0.7174995893227385 | 0.9420911997826152 | 0.9984454802122148 | T | T | T |
| 0.8776423020562515 | 0.9344563220350739 | 0.9946010944576125 | T | T | T |
| 0.9312491930628451 | 0.9707328186967509 | 0.2051560457931772 | T | T | T |
| 0.8197896916662112 | 0.9428319832480092 | 0.3519003106510976 | T | T | T |
| 0.5799554450830475 | 0.1748998883783171 | 0.3337237813690290 | T | T | T |
| 0.6971303889471723 | 0.1308508261100259 | 0.1988344298398649 | T | T | T |
| 0.7309196309418927 | 0.1712562349300837 | 0.9772035358679065 | T | T | T |
| 0.8849409061512509 | 0.1733553672940822 | 0.9923351600464659 | T | T | T |
| 0.9332667756063914 | 0.1292888710651068 | 0.2044918136660709 | T | T | T |
| 0.8180615827914187 | 0.1705199086840855 | 0.3383208782305031 | T | T | T |
| 0.9231291460211887 | 0.0581189335831543 | 0.8605731845202710 | T | T | T |
| 0.8043582428024024 | 0.0297972256849559 | 0.7208372171627301 | T | T | T |
| 0.7805271818947285 | 0.0600673828015308 | 0.4952544960724060 | T | T | T |
| 0.6205347985065139 | 0.0683089964268780 | 0.4932027382097326 | T | T | T |
| 0.5668091857454670 | 0.0324881742971508 | 0.7011462065198047 | T | T | T |
| 0.6771108203311735 | 0.0570376979755591 | 0.8519936236841849 | T | T | T |
| 0.9174085880391623 | 0.8256474454976580 | 0.8388558031118716 | T | T | T |
| 0.8025442681038881 | 0.8738361469114302 | 0.7038779563401628 | T | T | T |
| 0.7668216613374433 | 0.8325111424170258 | 0.4859152613629596 | T | T | T |
| 0.6121539329912492 | 0.8265171179177037 | 0.4968958668710997 | T | T | T |
| 0.5621008202744768 | 0.8760450685344221 | 0.7029904563942100 | T | T | T |

**Structure files (CONTCAR) involved in this work:**

|                    |                    |                    |   |   |   |
|--------------------|--------------------|--------------------|---|---|---|
| 0.6776618413033710 | 0.8373693600873251 | 0.8370642656389540 | T | T | T |
| 0.4231197789983634 | 0.4452728333498506 | 0.6391181044208145 | T | T | T |
| 0.3048195906147638 | 0.4734395845744982 | 0.7888269127135881 | T | T | T |
| 0.2854185423768351 | 0.4343688341724893 | 0.0075971327959697 | T | T | T |
| 0.1289476129428012 | 0.4328963281757749 | 0.0048363969486329 | T | T | T |
| 0.0760338835911328 | 0.4730107184652393 | 0.7978120724908115 | T | T | T |
| 0.1826774404426068 | 0.4494202014444642 | 0.6460986539553787 | T | T | T |
| 0.4240580031800354 | 0.6722840633928797 | 0.6638608737290970 | T | T | T |
| 0.3017285109915694 | 0.6301197865226965 | 0.7993718456375299 | T | T | T |
| 0.2693138286668308 | 0.6722332223550742 | 0.0182917287199453 | T | T | T |
| 0.1151952339901729 | 0.6734495757905938 | 0.0082521201958570 | T | T | T |
| 0.0656971928310791 | 0.6301008799200771 | 0.7995003888029889 | T | T | T |
| 0.1793105561736779 | 0.6692657766636466 | 0.6627931486822078 | T | T | T |
| 0.0782041710913089 | 0.5535767291269970 | 0.1356852200331042 | T | T | T |
| 0.1997068067625898 | 0.5282218392288573 | 0.2800306555266420 | T | T | T |
| 0.2214935038936821 | 0.5676029386965094 | 0.5017167907955631 | T | T | T |
| 0.3824283778310491 | 0.5705038352443358 | 0.5041818863551198 | T | T | T |
| 0.4345698195423208 | 0.5280684430649339 | 0.2960528909990558 | T | T | T |
| 0.3278682347052933 | 0.5529663054846935 | 0.1430951334685803 | T | T | T |
| 0.0829256870083325 | 0.3275486390761538 | 0.1549410458781283 | T | T | T |
| 0.1959706865987849 | 0.3697632772336819 | 0.3037837280189520 | T | T | T |
| 0.2314635080700700 | 0.3299393242393561 | 0.5225754914174663 | T | T | T |
| 0.3857101414244127 | 0.3272851976047465 | 0.5074590001953262 | T | T | T |
| 0.4334224131764954 | 0.3708948660029032 | 0.2939659803336446 | T | T | T |
| 0.3165384005937520 | 0.3262782774656764 | 0.1666666436934305 | T | T | T |
| 0.8118652250690781 | 0.5631450380990820 | 0.3344403299468374 | T | T | T |
| 0.8285968209802921 | 0.3297913121778640 | 0.3371878115098061 | T | T | T |
| 0.7929804181980642 | 0.4750474590103526 | 0.7253941939303831 | T | T | T |
| 0.3563544443365556 | 0.0622937573358162 | 0.7186729264930413 | T | T | T |
| 0.2999132691907089 | 0.0657508831388002 | 0.8956956746127326 | T | T | T |
| 0.1995305060635249 | 0.0509329381189222 | 0.0265443371669552 | T | T | T |
| 0.1007290554272896 | 0.0667974565494211 | 0.8946300156717847 | T | T | T |
| 0.1015933546662332 | 0.0571994210489110 | 0.6969667040768907 | T | T | T |
| 0.2277396346399305 | 0.0325910701534422 | 0.7386176295369579 | T | T | T |
| 0.3575321211292807 | 0.8263094830733066 | 0.7484324253102325 | T | T | T |
| 0.3038425008219897 | 0.8434963920166594 | 0.9245863739227933 | T | T | T |
| 0.1889790141294842 | 0.8517016221064987 | 0.0208970950813182 | T | T | T |
| 0.0836539840764047 | 0.8322723971948566 | 0.9046928510822624 | T | T | T |
| 0.1018256199221717 | 0.8372038940083192 | 0.7087207446153880 | T | T | T |
| 0.2279288228045351 | 0.8543895105098683 | 0.7626320607214553 | T | T | T |
| 0.3194319555645726 | 0.9479259811610503 | 0.8039363746038535 | T | T | T |
| 0.0805420845381211 | 0.9493957801014590 | 0.8105407094567444 | T | T | T |
| 0.4294931685255438 | 0.1268954285508425 | 0.5851155707091523 | T | T | T |
| 0.4160325743103275 | 0.9949362532516173 | 0.5692928926057560 | T | T | T |
| 0.3971884963463321 | 0.8626344763781639 | 0.5665794216577349 | T | T | T |
| 0.1940602053640046 | 0.1307957670852699 | 0.6115445147845698 | T | T | T |
| 0.1794017840197196 | 0.0025981546047294 | 0.5589903933450251 | T | T | T |
| 0.1925649986359025 | 0.8687126132873978 | 0.5704561546238738 | T | T | T |
| 0.9881494292519410 | 0.0460954363345402 | 0.7903877801506627 | T | T | T |
| 0.9818019297774174 | 0.8615636009423043 | 0.7862545543557693 | T | T | T |
| 0.1415261820803269 | 0.9390497436157867 | 0.2194982745911133 | T | T | T |
| 0.1970949159598409 | 0.9304747146692699 | 0.3968060187655122 | T | T | T |
| 0.2969076172118369 | 0.9462633628325493 | 0.5281412118368485 | T | T | T |

**Structure files (CONTCAR) involved in this work:**

|                    |                    |                    |   |   |   |
|--------------------|--------------------|--------------------|---|---|---|
| 0.3968721062710354 | 0.9297166613127048 | 0.3981710585820114 | T | T | T |
| 0.3955781111191244 | 0.9445302992544218 | 0.2008350290398367 | T | T | T |
| 0.2696218169872697 | 0.9699694367021695 | 0.2424228829832452 | T | T | T |
| 0.1411045466938019 | 0.1701107803702133 | 0.2401474358610618 | T | T | T |
| 0.1928450085658308 | 0.1623121769483439 | 0.4181912677175640 | T | T | T |
| 0.3079100239452632 | 0.1481954021184854 | 0.5139389221154931 | T | T | T |
| 0.4134157152154396 | 0.1706291864929573 | 0.3984877492737600 | T | T | T |
| 0.3956441231059422 | 0.1553012325796128 | 0.2041234377175004 | T | T | T |
| 0.2698426182949619 | 0.1392610935136429 | 0.2598879414302597 | T | T | T |
| 0.1764547644821226 | 0.0509635286392073 | 0.3131583615352309 | T | T | T |
| 0.4179182430978662 | 0.0492242148574099 | 0.3206388365330454 | T | T | T |
| 0.0666766055055578 | 0.8710390873121225 | 0.0933642060945930 | T | T | T |
| 0.0806880494780720 | 0.0014751062607611 | 0.0656162258397257 | T | T | T |
| 0.0974305464144722 | 0.1339276966055291 | 0.0613781513050623 | T | T | T |
| 0.3024001696047475 | 0.8690463638278472 | 0.1198588292844110 | T | T | T |
| 0.3170136768468180 | 0.9953821016334710 | 0.0601966067851222 | T | T | T |
| 0.3032879582420783 | 0.1292564348545646 | 0.0668030160227812 | T | T | T |
| 0.5093484783588720 | 0.9530517316194266 | 0.2940878847147108 | T | T | T |
| 0.5160040640328714 | 0.1364632420272407 | 0.2836225018240942 | T | T | T |
| 0.6447527397271757 | 0.5577663930487653 | 0.2741541621832879 | T | T | T |
| 0.6839883946228811 | 0.5727037999487595 | 0.0890526870250399 | T | T | T |
| 0.7933938372537825 | 0.5459361893001894 | 0.9815537614916500 | T | T | T |
| 0.9024414836478594 | 0.5680465034380840 | 0.0943554895811348 | T | T | T |
| 0.9009505399707933 | 0.5615386173750859 | 0.2966144932381988 | T | T | T |
| 0.7725210067330212 | 0.5397402872487996 | 0.2264874580363661 | T | T | T |
| 0.6418484214828404 | 0.3393929118350374 | 0.2667634375546899 | T | T | T |
| 0.7179646898857438 | 0.3261791053134057 | 0.1105411785741239 | T | T | T |
| 0.8066467433330587 | 0.3548869606759550 | 0.9666756013265523 | T | T | T |
| 0.9079389767456377 | 0.3355833710338338 | 0.0934309334491005 | T | T | T |
| 0.9096491554308853 | 0.3374329420726915 | 0.2917100786357031 | T | T | T |
| 0.7696654183294508 | 0.3774385380719988 | 0.2745666708599543 | T | T | T |
| 0.6810316489598726 | 0.4493166781674184 | 0.1698333828246236 | T | T | T |
| 0.9148727273297123 | 0.4512407355999878 | 0.1871307230862002 | T | T | T |
| 0.5718641714792830 | 0.6277052938324132 | 0.4037095726664125 | T | T | T |
| 0.5975240981084889 | 0.5002150681944497 | 0.4388399539268700 | T | T | T |
| 0.5825634119307197 | 0.3675054641143926 | 0.4409067035559595 | T | T | T |
| 0.8034736343087785 | 0.6444297544204121 | 0.3763304794975538 | T | T | T |
| 0.7994274348322010 | 0.5079258998560932 | 0.4326483547195770 | T | T | T |
| 0.8330672650530194 | 0.3784180554124891 | 0.4521236021706165 | T | T | T |
| 0.0118537277985171 | 0.5444442387489173 | 0.2049825326098532 | T | T | T |
| 0.0188285313016963 | 0.3712632844743364 | 0.1897658432865635 | T | T | T |
| 0.8735628896838181 | 0.4379435433863896 | 0.7547691570249213 | T | T | T |
| 0.8014849557014292 | 0.4395257279965330 | 0.6038126441240788 | T | T | T |
| 0.7014321172980599 | 0.4189210311717315 | 0.4761025589175676 | T | T | T |
| 0.6035309986411449 | 0.4320346019055260 | 0.6084131950626179 | T | T | T |
| 0.5973141741737104 | 0.4326896015502677 | 0.8060557928666945 | T | T | T |
| 0.7295103722150700 | 0.4333772607064860 | 0.7810875593051326 | T | T | T |
| 0.8637367231936903 | 0.6754142669258970 | 0.7415414750629234 | T | T | T |
| 0.8080991261970517 | 0.6413115036380757 | 0.5737749672635298 | T | T | T |
| 0.6907928302449955 | 0.6475871688147197 | 0.4849279812170448 | T | T | T |
| 0.5820075121482438 | 0.6603411107736692 | 0.5957933195521720 | T | T | T |
| 0.6051985183298743 | 0.6629371760717639 | 0.7920064831102731 | T | T | T |
| 0.7301914384994218 | 0.6733719157495638 | 0.7268014296884275 | T | T | T |

**Structure files (CONTCAR) involved in this work:**

|                    |                    |                    |   |   |   |
|--------------------|--------------------|--------------------|---|---|---|
| 0.7987773645052846 | 0.5598940203980277 | 0.7330619345385291 | T | T | T |
| 0.5864394374154408 | 0.5470714927114613 | 0.7011349630512496 | T | T | T |
| 0.9313629703314177 | 0.3700790626706636 | 0.9045402613567860 | T | T | T |
| 0.9107994928357226 | 0.5010895869207214 | 0.9241007683407345 | T | T | T |
| 0.8896469881544747 | 0.6324230763559291 | 0.9264356649535150 | T | T | T |
| 0.6754092892288740 | 0.3731485414709095 | 0.9373050702251995 | T | T | T |
| 0.6723410235040943 | 0.5073858813790931 | 0.9211502264771072 | T | T | T |
| 0.7063894493883431 | 0.6362083999858990 | 0.9174482366115556 | T | T | T |
| 0.4887866228747796 | 0.4568120277367454 | 0.7065087678853229 | T | T | T |
| 0.4848473115321569 | 0.6339213269475535 | 0.7214419802931334 | T | T | T |
| 0.6406213759410929 | 0.9375032244496126 | 0.2938298123645571 | T | T | T |
| 0.6915586765048229 | 0.9356441415066244 | 0.1125275806395595 | T | T | T |
| 0.7981912734808905 | 0.9498407737454146 | 0.9923697571052593 | T | T | T |
| 0.9036061877062573 | 0.9292674737148219 | 0.1089646844061412 | T | T | T |
| 0.8949958356618768 | 0.9443356723328516 | 0.3063236532508331 | T | T | T |
| 0.7690394737273232 | 0.9660802104062954 | 0.2638312801723592 | T | T | T |
| 0.6412598808494563 | 0.1757157632523536 | 0.2552559668777338 | T | T | T |
| 0.6960782273708875 | 0.1533934319981180 | 0.0828423060328831 | T | T | T |
| 0.8085507352945349 | 0.1461991342423853 | 0.9822583233926501 | T | T | T |
| 0.9082436800529158 | 0.1727952528412013 | 0.1083784432974785 | T | T | T |
| 0.8954611545435727 | 0.1553757935665621 | 0.3041418186485235 | T | T | T |
| 0.7704212932486436 | 0.1418790739785604 | 0.2477646237151897 | T | T | T |
| 0.6752918929844188 | 0.0522520339094806 | 0.2081803189733042 | T | T | T |
| 0.9172734203224305 | 0.0501028269956763 | 0.1856302651096255 | T | T | T |
| 0.5656581624962532 | 0.8748828039190545 | 0.4281884260956074 | T | T | T |
| 0.579942237222526  | 0.0070520749654155 | 0.4404295850963272 | T | T | T |
| 0.6024612511237093 | 0.1382556641268849 | 0.4370660444831330 | T | T | T |
| 0.8023679049457199 | 0.8671261697391098 | 0.3894850137866680 | T | T | T |
| 0.8151539605400762 | 0.9940835104642483 | 0.4459158316316519 | T | T | T |
| 0.8039645030574383 | 0.1282159518108143 | 0.4405383737113495 | T | T | T |
| 0.0107355981781827 | 0.9565893948722716 | 0.2200997045328678 | T | T | T |
| 0.0136747190548717 | 0.1390824418227205 | 0.2181447221589144 | T | T | T |
| 0.8578167082085314 | 0.0693475922872153 | 0.7905405855089891 | T | T | T |
| 0.8046826483724189 | 0.0634211345674556 | 0.6108845721031575 | T | T | T |
| 0.6998056575249582 | 0.0521214209702286 | 0.4870000479574211 | T | T | T |
| 0.5974067554573489 | 0.0761014250175664 | 0.6090563580924768 | T | T | T |
| 0.6023320949107960 | 0.0527332016275741 | 0.8058540101253144 | T | T | T |
| 0.7292435959572912 | 0.0347780121913075 | 0.7652289276581205 | T | T | T |
| 0.8555754691519099 | 0.8255274002138056 | 0.7606539350397229 | T | T | T |
| 0.8047946955329656 | 0.8582769144325603 | 0.5857623743155785 | T | T | T |
| 0.6885301763213186 | 0.8544007021341902 | 0.4914483769898900 | T | T | T |
| 0.5862048974361846 | 0.8276364328083664 | 0.6120193344903099 | T | T | T |
| 0.6012680019277059 | 0.8550165348068539 | 0.8046054914596307 | T | T | T |
| 0.7276230771123454 | 0.8612664248547173 | 0.7472915803170128 | T | T | T |
| 0.8262032495321984 | 0.9511115135365414 | 0.7207742653483389 | T | T | T |
| 0.5789016592372810 | 0.9535505045837356 | 0.6747366689752015 | T | T | T |
| 0.9342919985036553 | 0.1257267990970951 | 0.9268255963340838 | T | T | T |
| 0.9159274949219054 | 0.9944283744913905 | 0.9356984363256147 | T | T | T |
| 0.8955656860313093 | 0.8632906843789806 | 0.9413965414029908 | T | T | T |
| 0.6920883376046439 | 0.1333912506903606 | 0.8870293339734993 | T | T | T |
| 0.6830383069436262 | 0.0077916808324044 | 0.9483268180157788 | T | T | T |
| 0.6953737844831199 | 0.8744828009972353 | 0.9408946618631610 | T | T | T |
| 0.4876381495735632 | 0.0474990930800043 | 0.7161742448774377 | T | T | T |

**Structure files (CONTCAR) involved in this work:**

|                    |                    |                    |   |   |   |
|--------------------|--------------------|--------------------|---|---|---|
| 0.4821563920197097 | 0.8671899372718184 | 0.7213266868727312 | T | T | T |
| 0.3586189458573480 | 0.4420837267654689 | 0.7121254701801739 | T | T | T |
| 0.3047935805331815 | 0.4285091046330911 | 0.8901524228010379 | T | T | T |
| 0.2066223361419692 | 0.4536314928041756 | 0.0205420943365062 | T | T | T |
| 0.1108567080339721 | 0.4298604425152916 | 0.8865795385529889 | T | T | T |
| 0.1066038273826517 | 0.4542197094777931 | 0.6888233118106536 | T | T | T |
| 0.2314439555970524 | 0.4710556339200988 | 0.7371767673982079 | T | T | T |
| 0.3569588328104432 | 0.6667102102534339 | 0.7309015452163092 | T | T | T |
| 0.3000919919093775 | 0.6680781222881924 | 0.9063172539449657 | T | T | T |
| 0.1918661101941448 | 0.6465793137922554 | 0.0158727015869542 | T | T | T |
| 0.0918218083731851 | 0.6756531088334559 | 0.8921174530216548 | T | T | T |
| 0.1020884305326355 | 0.6555486768892135 | 0.6971913986098844 | T | T | T |
| 0.2287510574035608 | 0.6356858823491363 | 0.7456471373834900 | T | T | T |
| 0.3211971470646284 | 0.5514830476000804 | 0.8155125157794979 | T | T | T |
| 0.0853188955834140 | 0.5522826121622346 | 0.8223726119116249 | T | T | T |
| 0.4307466870437860 | 0.3749813870154235 | 0.5787852819036537 | T | T | T |
| 0.4155424338348348 | 0.5057428352712504 | 0.5584629346392851 | T | T | T |
| 0.4103329388403856 | 0.6389751582473086 | 0.5547255085738206 | T | T | T |
| 0.1959257439904649 | 0.3727904740359718 | 0.6110201949688738 | T | T | T |
| 0.1902968485101020 | 0.4996979014811915 | 0.5510865908293525 | T | T | T |
| 0.1901068822736712 | 0.6343225617143041 | 0.5539886894998822 | T | T | T |
| 0.9975532643123356 | 0.4541358858481460 | 0.7887333787354504 | T | T | T |
| 0.9854311801213036 | 0.6364146540219541 | 0.7860179101545091 | T | T | T |
| 0.1420484452697199 | 0.5610767322444227 | 0.2095273852988820 | T | T | T |
| 0.1998147124392454 | 0.5698076090318761 | 0.3847575333515095 | T | T | T |
| 0.3016899147056314 | 0.5666319333626864 | 0.5162127545322293 | T | T | T |
| 0.4028947450623325 | 0.5714016449593275 | 0.3875278538394679 | T | T | T |
| 0.4015918294349692 | 0.5563601313798617 | 0.1931285649183741 | T | T | T |
| 0.2723370692344373 | 0.5345175499567212 | 0.2280214220273047 | T | T | T |
| 0.1388038595191372 | 0.3301416391122740 | 0.2424607059735789 | T | T | T |
| 0.1925228156466671 | 0.3431864357053534 | 0.4179956393885477 | T | T | T |
| 0.3086493384046891 | 0.3541263305863766 | 0.5106982185477906 | T | T | T |
| 0.4120042658560968 | 0.3288675231376588 | 0.3931128258350465 | T | T | T |
| 0.3934840686914714 | 0.3414297421287016 | 0.1975173176929326 | T | T | T |
| 0.2690922860146992 | 0.3554083493612982 | 0.2558499436760628 | T | T | T |
| 0.1810869817872600 | 0.4501348626676897 | 0.3007674617057041 | T | T | T |
| 0.4143432092902440 | 0.4494813973464470 | 0.3114562401739159 | T | T | T |
| 0.0683227713681360 | 0.6221857797497700 | 0.0716394303405558 | T | T | T |
| 0.0837129451116695 | 0.4900313738231869 | 0.0600044766848392 | T | T | T |
| 0.1136919091461998 | 0.3594995652908328 | 0.0523181985310285 | T | T | T |
| 0.3115298499793850 | 0.6256274211234490 | 0.0943591798705161 | T | T | T |
| 0.3285167358382502 | 0.4945600229104880 | 0.0580520844801259 | T | T | T |
| 0.2997523529646048 | 0.3625693346066164 | 0.0606868332422610 | T | T | T |
| 0.5148958214002128 | 0.5358993241532796 | 0.2904433721514919 | T | T | T |
| 0.5125542004936116 | 0.3620305100069916 | 0.2724005181313359 | T | T | T |
| 0.4417830800695551 | 0.7506896132688419 | 0.6461425586369307 | T | T | T |
| 0.1936090211779416 | 0.7488646085170378 | 0.6511574055543675 | T | T | T |
| 0.2725588766768509 | 0.7491280344786545 | 0.0573634600112433 | T | T | T |
| 0.1076121458045777 | 0.7483911459115148 | 0.0541343844085030 | T | T | T |
| 0.0622721614411043 | 0.2502328389519752 | 0.1342190564388238 | T | T | T |
| 0.3039519255499104 | 0.2466840181643503 | 0.1526193325348084 | T | T | T |
| 0.2268524402516964 | 0.2517629405364514 | 0.5546345075098819 | T | T | T |
| 0.3899187785281703 | 0.2511000091087181 | 0.5500378376347241 | T | T | T |

**Structure files (CONTCAR) involved in this work:**

|                    |                    |                    |   |   |   |
|--------------------|--------------------|--------------------|---|---|---|
| 0.5602015255951479 | 0.2518697568902681 | 0.3585184137019765 | T | T | T |
| 0.8054417403210237 | 0.2482060296325997 | 0.3602105966071941 | T | T | T |
| 0.7260349749292134 | 0.2503675696518619 | 0.9508939677285447 | T | T | T |
| 0.8895314246533548 | 0.2491575884413037 | 0.9479051622190416 | T | T | T |
| 0.9365405006369985 | 0.7484547043933779 | 0.8664091340949744 | T | T | T |
| 0.6849071791876613 | 0.7584170424224091 | 0.8606844823728512 | T | T | T |
| 0.7734821263807922 | 0.7524908554797092 | 0.4780529551002070 | T | T | T |
| 0.6069211224120911 | 0.7502767795959707 | 0.4551768054429225 | T | T | T |
| 0.9836659494382317 | 0.6388065787510474 | 0.3783616150085577 | T | T | T |
| 0.8832359436521158 | 0.3866401326194200 | 0.6265620184142870 | T | T | T |
| 0.8924643621040297 | 0.3111082291420246 | 0.6491181370455077 | T | T | T |
| 0.9337951691128206 | 0.5948400127378760 | 0.3340931351446374 | T | T | T |
| 0.9890179265940118 | 0.6283366284061176 | 0.5354741573033106 | T | T | T |
| 0.9277728565361272 | 0.6853108774186965 | 0.4864596602241372 | T | T | T |
| 0.0143566549499537 | 0.7085590535381734 | 0.4862301138535025 | T | T | T |
| 0.0290358165669765 | 0.6237600893085087 | 0.3644124238347690 | T | T | T |
| 0.8907839896981237 | 0.4045655782062584 | 0.4816499580307192 | T | T | T |
| 0.9423276912525600 | 0.4566446755693671 | 0.4439198851509359 | T | T | T |
| 0.9434141349316196 | 0.4850805121802684 | 0.5660078750361013 | T | T | T |
| 0.9934963531427978 | 0.4130867510939645 | 0.5299284276063611 | T | T | T |
| 0.9789498780741441 | 0.6667214612056636 | 0.4782357438091310 | T | T | T |
| 0.9450959597529722 | 0.4382858719318002 | 0.5219510628318969 | T | T | T |

**Figure S10 Ga-FS**

Si Al O Ga H C

1.0000000000000000

20.0219999999999985 0.0000000000000000 0.0000000000000000

0.0000000000000000 19.8990000000000009 0.0000000000000000

0.0000000000000000 0.0000000000000000 13.3829999999999991

93 3 193 1 10 2

Selective dynamics

Direct

|                    |                    |                    |   |   |   |
|--------------------|--------------------|--------------------|---|---|---|
| 0.4218196515172738 | 0.0575587840191864 | 0.6481850629482352 | T | T | T |
| 0.3014076842225049 | 0.0271273702991047 | 0.7899218951383322 | T | T | T |
| 0.2795579891714520 | 0.0601165548363807 | 0.0132043385039851 | T | T | T |
| 0.1196239397495784 | 0.0630938597383307 | 0.0123305460970748 | T | T | T |
| 0.0667127278157427 | 0.0295102491599100 | 0.7986514257819262 | T | T | T |
| 0.1768551787218748 | 0.0560333665052511 | 0.6521584212271765 | T | T | T |
| 0.4198001400764003 | 0.8271922906845087 | 0.6713472242844606 | T | T | T |
| 0.3020612057808225 | 0.8686881040651294 | 0.8101165010746177 | T | T | T |
| 0.2669254598356492 | 0.8283993834834016 | 0.0299783528934094 | T | T | T |
| 0.1118471001216884 | 0.8265326661790093 | 0.0171225408910869 | T | T | T |
| 0.0614740163726928 | 0.8702985865313323 | 0.8021716866187006 | T | T | T |
| 0.1796532197803526 | 0.8276196739475689 | 0.6745524332547628 | T | T | T |
| 0.0754726315416611 | 0.9425502752521145 | 0.1510317011511361 | T | T | T |
| 0.1960592531680564 | 0.9724358513035503 | 0.2939726622672081 | T | T | T |
| 0.2171377223084818 | 0.9366166156062725 | 0.5149905946756769 | T | T | T |
| 0.3769528735532359 | 0.9337209724340318 | 0.5158024405736086 | T | T | T |
| 0.4306779854671975 | 0.9690782822414555 | 0.3045259373913549 | T | T | T |
| 0.3204382827922065 | 0.9442396209424923 | 0.1566713121467614 | T | T | T |
| 0.0786004359995391 | 0.1723393672248539 | 0.1646820206202175 | T | T | T |
| 0.1958199941646612 | 0.1299319719949708 | 0.3074647150309118 | T | T | T |
| 0.2309386786807071 | 0.1729939156736835 | 0.5241831616781611 | T | T | T |
| 0.3855693753612520 | 0.1738676423337492 | 0.5115698975398185 | T | T | T |

**Structure files (CONTCAR) involved in this work:**

|                    |                    |                    |   |   |   |
|--------------------|--------------------|--------------------|---|---|---|
| 0.4367944667364150 | 0.1272719091685532 | 0.3015782692134146 | T | T | T |
| 0.3186486140870116 | 0.1672472190270815 | 0.1719849024769784 | T | T | T |
| 0.5836654623927811 | 0.5548118432774910 | 0.3492696033415685 | T | T | T |
| 0.6958993647295352 | 0.5292043152166060 | 0.1883040813613428 | T | T | T |
| 0.7145044419594851 | 0.5650116052783460 | 0.9743576938098872 | T | T | T |
| 0.8728933262623306 | 0.5629284344828729 | 0.9830618257280163 | T | T | T |
| 0.9329409920895249 | 0.5310483758644581 | 0.1909903709960706 | T | T | T |
| 0.5760639170049409 | 0.3290802991132211 | 0.3316312714297447 | T | T | T |
| 0.7009486734363007 | 0.3736778272239125 | 0.2019839750396417 | T | T | T |
| 0.7320194896558648 | 0.3266607879172991 | 0.9866794404818915 | T | T | T |
| 0.8837846963644710 | 0.3268369956354499 | 0.9836616565370776 | T | T | T |
| 0.9358753683495450 | 0.3728663138640154 | 0.1954895940816012 | T | T | T |
| 0.9286873070123054 | 0.4405903928111681 | 0.8542100670878683 | T | T | T |
| 0.7823176361438700 | 0.4421926494100666 | 0.4877499827344315 | T | T | T |
| 0.6239335943342784 | 0.4305345297268011 | 0.4901614236092066 | T | T | T |
| 0.5681052721599013 | 0.4669894652627066 | 0.7035538171117939 | T | T | T |
| 0.6708944922964988 | 0.4357339525407158 | 0.8543195115106250 | T | T | T |
| 0.9181154044822222 | 0.6719556021103691 | 0.8286487819017644 | T | T | T |
| 0.7999645368899364 | 0.6326007046526536 | 0.6942963057573992 | T | T | T |
| 0.7681371549709530 | 0.6696015355800184 | 0.4778928348973963 | T | T | T |
| 0.6123958456987938 | 0.6710402753713156 | 0.4855480389797032 | T | T | T |
| 0.5641970914412410 | 0.6253827943282856 | 0.7019754843140891 | T | T | T |
| 0.6816623451238228 | 0.6801961843322166 | 0.8222099906045589 | T | T | T |
| 0.5751670609468748 | 0.9432593443550285 | 0.3638356278508167 | T | T | T |
| 0.6939790825743994 | 0.9720275977369630 | 0.2187572397593260 | T | T | T |
| 0.7183060959932931 | 0.9409018909098136 | 0.9975965574142386 | T | T | T |
| 0.8783259014377929 | 0.9337641114111107 | 0.9942166464852510 | T | T | T |
| 0.9313233929864201 | 0.9690874961425248 | 0.2059002554944594 | T | T | T |
| 0.8192369088167619 | 0.9402350099010444 | 0.3517751568219622 | T | T | T |
| 0.5807811970888153 | 0.1741247572496980 | 0.3336469417151842 | T | T | T |
| 0.6973451126650969 | 0.1293359343110304 | 0.1971794213248221 | T | T | T |
| 0.7319046780312720 | 0.1707903757379766 | 0.9764323895818279 | T | T | T |
| 0.8859795331502461 | 0.1726090073587565 | 0.9933352443096728 | T | T | T |
| 0.9343073471843362 | 0.1277599159827948 | 0.2053405684706174 | T | T | T |
| 0.8179027956649962 | 0.1669625643936755 | 0.3366494700359755 | T | T | T |
| 0.9232398885525561 | 0.0576539397539902 | 0.8605869645833550 | T | T | T |
| 0.8048752172109225 | 0.0290332450957226 | 0.7209351998663314 | T | T | T |
| 0.7808359651512321 | 0.0575147731003675 | 0.4955893039832404 | T | T | T |
| 0.6208349467255727 | 0.0677311170371454 | 0.4936757549243525 | T | T | T |
| 0.5666865838826298 | 0.0325370131411513 | 0.7015982322699978 | T | T | T |
| 0.6777481139035254 | 0.0561250345974018 | 0.8512986636905173 | T | T | T |
| 0.9173205947942662 | 0.8248605365533954 | 0.8379999215900676 | T | T | T |
| 0.8028059003214284 | 0.8736132581726420 | 0.7033603066942631 | T | T | T |
| 0.7669888828149964 | 0.8308784862830562 | 0.4867015008884543 | T | T | T |
| 0.6119876749695145 | 0.8259255599919343 | 0.4970864066530121 | T | T | T |
| 0.5621600787101259 | 0.8760090379350203 | 0.7033493286636479 | T | T | T |
| 0.6782498882663011 | 0.8369018232291906 | 0.8356019555325539 | T | T | T |
| 0.4222164570681411 | 0.4447739711066738 | 0.6398008261120827 | T | T | T |
| 0.3051608262076108 | 0.4727677892919284 | 0.7902500953548844 | T | T | T |
| 0.2850589081903922 | 0.4346057062250452 | 0.0099018054476763 | T | T | T |
| 0.1285374720172865 | 0.4326946645964471 | 0.0067102104231484 | T | T | T |
| 0.0759122068301978 | 0.4722442702232373 | 0.8003459361465539 | T | T | T |
| 0.1826156364936360 | 0.4489666144372862 | 0.6489639832590207 | T | T | T |



**Structure files (CONTCAR) involved in this work:**

|                    |                    |                    |   |   |   |
|--------------------|--------------------|--------------------|---|---|---|
| 0.4234290527572001 | 0.6724836954772063 | 0.6645702007376674 | T | T | T |
| 0.3022317768292726 | 0.6296377772608136 | 0.8004895228434178 | T | T | T |
| 0.2691235739720966 | 0.6718777641299860 | 0.0193513135976403 | T | T | T |
| 0.1149561946526540 | 0.6736489211722010 | 0.0078776659550375 | T | T | T |
| 0.0655113885740628 | 0.6292938964073886 | 0.7997372293061100 | T | T | T |
| 0.1797681075679491 | 0.6689345061835709 | 0.6644888380832442 | T | T | T |
| 0.0784550190556297 | 0.5540606022300177 | 0.1358811211180104 | T | T | T |
| 0.1990113787421386 | 0.5281981285199657 | 0.2813795322501950 | T | T | T |
| 0.2206890363765950 | 0.5672409155471922 | 0.5027037207323548 | T | T | T |
| 0.3820102448983765 | 0.5704934758069451 | 0.5044362452590508 | T | T | T |
| 0.4352111100291882 | 0.5280796932419441 | 0.2967736201291457 | T | T | T |
| 0.3273265242128763 | 0.5534316243309196 | 0.1464740781243043 | T | T | T |
| 0.0819420217321394 | 0.3270857338545006 | 0.1574261338773778 | T | T | T |
| 0.1955051817075981 | 0.3695021395779502 | 0.3047963528022759 | T | T | T |
| 0.2311924175029113 | 0.3301348819583668 | 0.5238160536509203 | T | T | T |
| 0.3852843275795894 | 0.3272099387653805 | 0.5077856107923647 | T | T | T |
| 0.4327547134763675 | 0.3711048816460149 | 0.2948327283402993 | T | T | T |
| 0.3162710245620334 | 0.3259870478950035 | 0.1677083689050859 | T | T | T |
| 0.8119581975424568 | 0.5644202722745142 | 0.3307342060989217 | T | T | T |
| 0.8236205259877392 | 0.3251983800107627 | 0.3293096663627022 | T | T | T |
| 0.7960123653997362 | 0.4718175285571727 | 0.7251994236374689 | T | T | T |
| 0.3563000229329619 | 0.0630065101810401 | 0.7189620708406025 | T | T | T |
| 0.3008544656497856 | 0.0653950072513101 | 0.8967881351152419 | T | T | T |
| 0.1992938507363962 | 0.0506774191447355 | 0.0254945062241416 | T | T | T |
| 0.0993728872070025 | 0.0661474137807370 | 0.8955036696108175 | T | T | T |
| 0.1017757304566228 | 0.0577256190916771 | 0.6976822148266482 | T | T | T |
| 0.2277690384508333 | 0.0332524113079692 | 0.7403573187276390 | T | T | T |
| 0.3575732202615626 | 0.8262358584212937 | 0.7490167713969094 | T | T | T |
| 0.3045247405985851 | 0.8443855560045657 | 0.9254107316827145 | T | T | T |
| 0.1891758043857086 | 0.8518799496596251 | 0.0203612178419121 | T | T | T |
| 0.0836037558788401 | 0.8325007773789462 | 0.9043127989804295 | T | T | T |
| 0.1020172904440298 | 0.8371826916698890 | 0.7084933656062010 | T | T | T |
| 0.2279294860301840 | 0.8545626226293793 | 0.7640950597038745 | T | T | T |
| 0.3199067231486346 | 0.9481190022148557 | 0.8031173088411201 | T | T | T |
| 0.0798889306873244 | 0.9493039566188122 | 0.8095907871139616 | T | T | T |
| 0.4297435081216573 | 0.1269579451852716 | 0.5852032451130914 | T | T | T |
| 0.4162309137458312 | 0.9949574403164653 | 0.5703576060845933 | T | T | T |
| 0.3971333005069481 | 0.8627259001570274 | 0.5673020482432082 | T | T | T |
| 0.1946883430115926 | 0.1306829421985159 | 0.6120196543958405 | T | T | T |
| 0.1796988403877567 | 0.0021586988967929 | 0.5609254255446771 | T | T | T |
| 0.1936926757031959 | 0.8682659405187407 | 0.5714828821400997 | T | T | T |
| 0.9876445237889868 | 0.0459283080450829 | 0.7890342531544877 | T | T | T |
| 0.9816287389351107 | 0.8608678373726488 | 0.7852140867230714 | T | T | T |
| 0.1417354668399100 | 0.9383861624589825 | 0.2201895439937550 | T | T | T |
| 0.1964438129245455 | 0.9305031651127059 | 0.3981367144126687 | T | T | T |
| 0.2971945943039676 | 0.9466520689566149 | 0.5277627041153806 | T | T | T |
| 0.3976745509575610 | 0.9296702764088819 | 0.3990087949848285 | T | T | T |
| 0.3956325769576349 | 0.9441605054559506 | 0.2015146984010451 | T | T | T |
| 0.2698252928131809 | 0.9690568385856149 | 0.2442227170134335 | T | T | T |
| 0.1419038315907242 | 0.1699579237929406 | 0.2400107077840636 | T | T | T |
| 0.1928307533033047 | 0.1618559698049286 | 0.4186053732480956 | T | T | T |
| 0.3081541605597896 | 0.1482774999873553 | 0.5135493366965604 | T | T | T |
| 0.4140502701311575 | 0.1705510837794020 | 0.3985747325447991 | T | T | T |

**Structure files (CONTCAR) involved in this work:**

|                    |                    |                    |   |   |   |
|--------------------|--------------------|--------------------|---|---|---|
| 0.3961591128031379 | 0.1549212169069720 | 0.2042201450050088 | T | T | T |
| 0.2704827344786986 | 0.1389613546168477 | 0.2610074774816007 | T | T | T |
| 0.1765919568026214 | 0.0506824551219490 | 0.3129526296373291 | T | T | T |
| 0.4183160088540585 | 0.0490120704676268 | 0.3209721160479147 | T | T | T |
| 0.0669275727571246 | 0.8713006594830632 | 0.0927584996779798 | T | T | T |
| 0.0804665691088888 | 0.0021381417831824 | 0.0680500031894433 | T | T | T |
| 0.0977591991054688 | 0.1342430832076878 | 0.0613342691680024 | T | T | T |
| 0.3022507453351305 | 0.8685435940559778 | 0.1209041736207486 | T | T | T |
| 0.3163914888699056 | 0.9949998326838517 | 0.0616742470904357 | T | T | T |
| 0.3029843410436688 | 0.1288514280679539 | 0.0677680852348399 | T | T | T |
| 0.5096326529075463 | 0.9527624153691904 | 0.2939046412398970 | T | T | T |
| 0.5166459731030835 | 0.1358778431549738 | 0.2837474428253126 | T | T | T |
| 0.6446378839664907 | 0.5598886893141082 | 0.2712717007061954 | T | T | T |
| 0.6823341142043382 | 0.5707643463131046 | 0.0850674315237941 | T | T | T |
| 0.7940468085329558 | 0.5462837484472607 | 0.9827709698324769 | T | T | T |
| 0.9026574965139192 | 0.5703488782937438 | 0.0959224702096120 | T | T | T |
| 0.9010272565475556 | 0.5639168894324542 | 0.2956413798442974 | T | T | T |
| 0.7718256126824193 | 0.5402399449452164 | 0.2234886018873227 | T | T | T |
| 0.6393045730827449 | 0.3367380167368731 | 0.2587813370724446 | T | T | T |
| 0.7170585197529279 | 0.3270670023286853 | 0.1050734187719498 | T | T | T |
| 0.8080399422744970 | 0.3544590557898726 | 0.9646707006120879 | T | T | T |
| 0.9037325038550856 | 0.3341586694101889 | 0.1001524077780581 | T | T | T |
| 0.9065266096931862 | 0.3403586305133079 | 0.2959495203332780 | T | T | T |
| 0.7661774652373660 | 0.3752929096832603 | 0.2711528675552022 | T | T | T |
| 0.6789103514481608 | 0.4495775708580901 | 0.1695800834750949 | T | T | T |
| 0.9152992024051603 | 0.4524681092601119 | 0.1878466591363548 | T | T | T |
| 0.5713205270275639 | 0.6268980595844134 | 0.4036638054403162 | T | T | T |
| 0.6013492593378157 | 0.4996217462774665 | 0.4355113104965799 | T | T | T |
| 0.5883177146307920 | 0.3666550019573904 | 0.4380414420068219 | T | T | T |
| 0.8015507201653551 | 0.6446265468218910 | 0.3758177514233477 | T | T | T |
| 0.8028896216102548 | 0.5067025260256469 | 0.4266836675164072 | T | T | T |
| 0.8323747928074383 | 0.3771456471967518 | 0.4453775502080841 | T | T | T |
| 0.0124717540674438 | 0.5451270657112351 | 0.2060388158001052 | T | T | T |
| 0.0171022872657172 | 0.3695726934012127 | 0.1931380938335956 | T | T | T |
| 0.8731819908992058 | 0.4344397972819505 | 0.7651947319412908 | T | T | T |
| 0.8106760809375084 | 0.4428563370554873 | 0.6017741148121438 | T | T | T |
| 0.7051142687812225 | 0.4201073669113299 | 0.4827125047794217 | T | T | T |
| 0.6016360515066560 | 0.4320882540707535 | 0.6059370521591614 | T | T | T |
| 0.5967542064249420 | 0.4323545038840908 | 0.8041128206688757 | T | T | T |
| 0.7275829942776619 | 0.4317702687482700 | 0.7701461513860369 | T | T | T |
| 0.8634917841094225 | 0.6740884111606154 | 0.7400080757870784 | T | T | T |
| 0.8071910525789749 | 0.6364710405369935 | 0.5734182293390675 | T | T | T |
| 0.6897780491070495 | 0.6468885276674951 | 0.4857388536446849 | T | T | T |
| 0.5805132620949840 | 0.6602268740305403 | 0.5954859850443045 | T | T | T |
| 0.6049384127394354 | 0.6623573538723805 | 0.7914110550682194 | T | T | T |
| 0.7299566894420367 | 0.6696124589518913 | 0.7254340948405227 | T | T | T |
| 0.8009416169740021 | 0.5571588823069474 | 0.7363315395567761 | T | T | T |
| 0.5853898774970154 | 0.5468062660522686 | 0.6997518432830401 | T | T | T |
| 0.9351807916887916 | 0.3705470351832161 | 0.9151244515431396 | T | T | T |
| 0.9128176492669522 | 0.5011969499533331 | 0.9302623407324292 | T | T | T |
| 0.8895968980051829 | 0.6323549617927151 | 0.9256715546104664 | T | T | T |
| 0.6772140347333082 | 0.3724432259650898 | 0.9304996496241846 | T | T | T |
| 0.6756204311027458 | 0.5064545427667891 | 0.9147921779877273 | T | T | T |

**Structure files (CONTCAR) involved in this work:**

|                    |                    |                    |   |   |   |
|--------------------|--------------------|--------------------|---|---|---|
| 0.7063261260058245 | 0.6361617481861822 | 0.9170046614449296 | T | T | T |
| 0.4879033101375402 | 0.4565094299468400 | 0.7068988288756161 | T | T | T |
| 0.4840846170561598 | 0.6336984835114544 | 0.7218606778004357 | T | T | T |
| 0.6405804058713249 | 0.9367021806053428 | 0.2930579131168030 | T | T | T |
| 0.6921872313524026 | 0.9341114895381526 | 0.1116127777500037 | T | T | T |
| 0.7989358477108015 | 0.9494834168459475 | 0.9920156554174234 | T | T | T |
| 0.9040735032074345 | 0.9284554355770959 | 0.1087180940210490 | T | T | T |
| 0.8945000672341359 | 0.9421504486276966 | 0.3063258052501754 | T | T | T |
| 0.7687993400489760 | 0.9647463559499180 | 0.2639826899758563 | T | T | T |
| 0.6424728808235517 | 0.1743484824273103 | 0.2556067977998623 | T | T | T |
| 0.6962461047489527 | 0.1537734738020406 | 0.0820047400144989 | T | T | T |
| 0.8094691808258030 | 0.1458524046518453 | 0.9834684200794852 | T | T | T |
| 0.9095314334533978 | 0.1710907829195854 | 0.1091624064703304 | T | T | T |
| 0.8960283628518249 | 0.1548501355437013 | 0.3042097239832236 | T | T | T |
| 0.7713315860143041 | 0.1380761291728109 | 0.2453334021732998 | T | T | T |
| 0.6750399705671974 | 0.0508361009874327 | 0.2054138668697022 | T | T | T |
| 0.9176793123481467 | 0.0486692888914376 | 0.1877262853764664 | T | T | T |
| 0.5659217338893558 | 0.8746701963667270 | 0.4283651169709529 | T | T | T |
| 0.5803808738839628 | 0.0067517082430575 | 0.4399874569380681 | T | T | T |
| 0.6035667804096372 | 0.1377384851360816 | 0.4370651566276403 | T | T | T |
| 0.8018369628048673 | 0.8641859962790358 | 0.3883825133312866 | T | T | T |
| 0.8142636717449250 | 0.9907421745972086 | 0.4467665596310878 | T | T | T |
| 0.8044168505848214 | 0.1249210251371281 | 0.4388063882186715 | T | T | T |
| 0.0107603293848102 | 0.9550142608064180 | 0.2213647540922217 | T | T | T |
| 0.0146498460692471 | 0.1377115214060717 | 0.2192317094851025 | T | T | T |
| 0.8572769408825905 | 0.0689319537245150 | 0.7919238408991901 | T | T | T |
| 0.8062785372754723 | 0.0619531131501309 | 0.6104627999624669 | T | T | T |
| 0.7000052988469363 | 0.0507871820002814 | 0.4891123602076322 | T | T | T |
| 0.5969028360745283 | 0.0759946924524532 | 0.6090353296563842 | T | T | T |
| 0.6026785321039226 | 0.0527112364719965 | 0.8059861364728359 | T | T | T |
| 0.7292311445039468 | 0.0339557777297081 | 0.7634919247057296 | T | T | T |
| 0.8550673779615459 | 0.8246803496544794 | 0.7604816909935028 | T | T | T |
| 0.8053154523176974 | 0.8588519648971954 | 0.5849948008742978 | T | T | T |
| 0.6886989153021520 | 0.8527974817301466 | 0.4915363211340658 | T | T | T |
| 0.5862210765060951 | 0.8276339308494501 | 0.6122798846851923 | T | T | T |
| 0.6016216085937663 | 0.8550921509923841 | 0.8048428204302738 | T | T | T |
| 0.7274574992235050 | 0.8618179211029188 | 0.7455160279935595 | T | T | T |
| 0.8271510603090840 | 0.9505021678811084 | 0.7217387016265309 | T | T | T |
| 0.5785949452563852 | 0.9535919545794449 | 0.6750664111172502 | T | T | T |
| 0.9348681843887654 | 0.1251530514875404 | 0.9269028272630513 | T | T | T |
| 0.9168302708291198 | 0.9938071215153796 | 0.9357015191274509 | T | T | T |
| 0.8960387086116776 | 0.8625914087028819 | 0.9408514160386167 | T | T | T |
| 0.6935627607606253 | 0.1321921633966668 | 0.8866212736195000 | T | T | T |
| 0.6836121401387573 | 0.0063908846249620 | 0.9471304013198992 | T | T | T |
| 0.6968888235286210 | 0.8730664722138574 | 0.9399311575877594 | T | T | T |
| 0.4876123676266310 | 0.0478869848390547 | 0.7171506974914842 | T | T | T |
| 0.4822501823564779 | 0.8670821694245847 | 0.7219229570788424 | T | T | T |
| 0.3579525175351845 | 0.4398939250776614 | 0.7131957377928789 | T | T | T |
| 0.3056510239828431 | 0.4293287009850782 | 0.8929213114225586 | T | T | T |
| 0.2061826613712131 | 0.4534085584728590 | 0.0224319937760147 | T | T | T |
| 0.1113362535105341 | 0.4289712485240855 | 0.8884247226571155 | T | T | T |
| 0.1065846323017420 | 0.4533499478675841 | 0.6915416372673463 | T | T | T |
| 0.2312559746282359 | 0.4701522705847455 | 0.7404669950552458 | T | T | T |

**Structure files (CONTCAR) involved in this work:**

|                    |                    |                    |   |   |   |
|--------------------|--------------------|--------------------|---|---|---|
| 0.3565886744077628 | 0.6677203378259091 | 0.7322948864957500 | T | T | T |
| 0.3012715031363784 | 0.6661527750446579 | 0.9085011431884752 | T | T | T |
| 0.1916020542152300 | 0.6467173538437928 | 0.0150257726675447 | T | T | T |
| 0.0909440545599077 | 0.6755876504318287 | 0.8920766786477512 | T | T | T |
| 0.1024842111304527 | 0.6545904312015914 | 0.6978122641217244 | T | T | T |
| 0.2288655784516824 | 0.6352990726867188 | 0.7478712875820677 | T | T | T |
| 0.3226579462839637 | 0.5510204007243040 | 0.8137939922131141 | T | T | T |
| 0.0852678820143440 | 0.5517042779771109 | 0.8240559501700557 | T | T | T |
| 0.4308045142830367 | 0.3751349245638543 | 0.5780285660622984 | T | T | T |
| 0.4139726745764318 | 0.5059218885404756 | 0.5605578931199967 | T | T | T |
| 0.4086070096633615 | 0.6391479931006490 | 0.5558648390906008 | T | T | T |
| 0.1961033811855137 | 0.3725468573895677 | 0.6130286936507403 | T | T | T |
| 0.1904712895101800 | 0.4998870001192640 | 0.5547934129286517 | T | T | T |
| 0.1912198461496416 | 0.6345971243561354 | 0.5554694847338020 | T | T | T |
| 0.9975307173758015 | 0.4531106025945681 | 0.7936488386829491 | T | T | T |
| 0.9853107373220258 | 0.6353523611016533 | 0.7850093416735119 | T | T | T |
| 0.1428511125156864 | 0.5614026013800277 | 0.2086089042170249 | T | T | T |
| 0.1962580568733079 | 0.5687330012288740 | 0.3868906604585025 | T | T | T |
| 0.3011622290047510 | 0.5660017011179304 | 0.5118028190841173 | T | T | T |
| 0.4053503483780678 | 0.5717063278448412 | 0.3890802845907838 | T | T | T |
| 0.4016103673308881 | 0.5570532180855550 | 0.1947152237624372 | T | T | T |
| 0.2727813298565425 | 0.5354458674664293 | 0.2331214454707522 | T | T | T |
| 0.1379763423449999 | 0.3294683483397322 | 0.2446742328991185 | T | T | T |
| 0.1921144946288245 | 0.3442677007984360 | 0.4196320621845840 | T | T | T |
| 0.3083917436876965 | 0.3542379914096953 | 0.5118528871008818 | T | T | T |
| 0.4108249990857173 | 0.3286031136451472 | 0.3931171383436362 | T | T | T |
| 0.3932294338774175 | 0.3418837303573835 | 0.1978752682338776 | T | T | T |
| 0.2686296064915477 | 0.3542769564821072 | 0.2573192919262810 | T | T | T |
| 0.1805983449059030 | 0.4497701425433186 | 0.2992510754598992 | T | T | T |
| 0.4139463782224418 | 0.4497388469913379 | 0.3122940877165722 | T | T | T |
| 0.0682695078179251 | 0.6226051501383850 | 0.0719173523631600 | T | T | T |
| 0.0831765197630002 | 0.4903306037947276 | 0.0604906753432183 | T | T | T |
| 0.1124527422841324 | 0.3598519974545248 | 0.0553731825076298 | T | T | T |
| 0.3101767193372739 | 0.6258638441515343 | 0.0976245081396311 | T | T | T |
| 0.3274053137498655 | 0.4946673571771613 | 0.0620076856615556 | T | T | T |
| 0.2990402437755308 | 0.3624308544302425 | 0.0620843049590772 | T | T | T |
| 0.5156433658839521 | 0.5345293727397130 | 0.2899702942734695 | T | T | T |
| 0.5119494209464999 | 0.3621765728771918 | 0.2749458547939629 | T | T | T |
| 0.4418176131801933 | 0.7507077541585730 | 0.6464387716847920 | T | T | T |
| 0.1939886154624893 | 0.7485888427323276 | 0.6534313935040217 | T | T | T |
| 0.2724813192583914 | 0.7491238783693979 | 0.0567036812981375 | T | T | T |
| 0.1077532738455202 | 0.7486557701961165 | 0.0536443366501246 | T | T | T |
| 0.0617534689690294 | 0.2497636817935525 | 0.1357748176071751 | T | T | T |
| 0.3044058194951421 | 0.2463284684062365 | 0.1532574384370967 | T | T | T |
| 0.2267996192969998 | 0.2517046945765585 | 0.5545477463336971 | T | T | T |
| 0.3899571965816506 | 0.2510465848148800 | 0.5502206118551832 | T | T | T |
| 0.5607064412935545 | 0.2511185678657021 | 0.3581805404862290 | T | T | T |
| 0.8026669440052790 | 0.2445923420590228 | 0.3573141205551698 | T | T | T |
| 0.7275286966429917 | 0.2496137066176497 | 0.9481625090594705 | T | T | T |
| 0.8911849791466865 | 0.2488758582896503 | 0.9511349372562438 | T | T | T |
| 0.9365135848812651 | 0.7476253853126998 | 0.8645880795043521 | T | T | T |
| 0.6859412431513856 | 0.7577180423223637 | 0.8565594219831427 | T | T | T |
| 0.7741008699793430 | 0.7506988850766281 | 0.4838452312657199 | T | T | T |

**Structure files (CONTCAR) involved in this work:**

|                    |                    |                    |   |   |   |
|--------------------|--------------------|--------------------|---|---|---|
| 0.6060009075161659 | 0.7497877832800993 | 0.4551663821058433 | T | T | T |
| 0.9838246231170946 | 0.6411977058458876 | 0.3751469869903006 | T | T | T |
| 0.9042481056000953 | 0.4005033675088933 | 0.6283514547234068 | T | T | T |
| 0.8981787994473640 | 0.3225592157244286 | 0.6356644827198540 | T | T | T |
| 0.9339571907751237 | 0.5975980316427764 | 0.3334999592575084 | T | T | T |
| 0.9886205493724906 | 0.6291703915894128 | 0.5319571351709774 | T | T | T |
| 0.9293512370423730 | 0.6886748914639752 | 0.4839865147845986 | T | T | T |
| 0.0166782507254650 | 0.7090058330052457 | 0.4841247501738851 | T | T | T |
| 0.0283585032754962 | 0.6233362998792348 | 0.3622173498896724 | T | T | T |
| 0.8772491725338446 | 0.3947783879595842 | 0.4300249016405303 | T | T | T |
| 0.9425633583788576 | 0.4822729358751182 | 0.4882504478629211 | T | T | T |
| 0.9574103375857151 | 0.5144452308528399 | 0.6100467037932948 | T | T | T |
| 1.0131178523341720 | 0.4530637660517953 | 0.5590912455470791 | T | T | T |
| 0.9799029859981041 | 0.6684324299764193 | 0.4756298762633120 | T | T | T |
| 0.9608685027927619 | 0.4691707031415402 | 0.5632690207652639 | T | T | T |

**Figure S10 Mo-IS**

Si Al O C Mo H

1.0000000000000000

20.0219999999999985 0.0000000000000000 0.0000000000000000

0.0000000000000000 19.8990000000000009 0.0000000000000000

0.0000000000000000 0.0000000000000000 13.3829999999999991

93 3 193 4 4 9

Selective dynamics

Direct

|                    |                    |                    |   |   |   |
|--------------------|--------------------|--------------------|---|---|---|
| 0.4246664902209824 | 0.0587209264422362 | 0.6534347706811185 | T | T | T |
| 0.3064949498886501 | 0.0288749535564183 | 0.7970402680786929 | T | T | T |
| 0.2819222713581835 | 0.0558257383721594 | 0.0206986735339816 | T | T | T |
| 0.1222220151399943 | 0.0636815993594990 | 0.0189785675542763 | T | T | T |
| 0.0670399910883241 | 0.0313808504435263 | 0.8078274455329444 | T | T | T |
| 0.1807794327755380 | 0.0646521661332542 | 0.6722446766182887 | T | T | T |
| 0.4172674170846367 | 0.8285096125070875 | 0.6710424003488904 | T | T | T |
| 0.3042473436316173 | 0.8699532803979432 | 0.8099515640007773 | T | T | T |
| 0.2692988644070388 | 0.8322181293280778 | 0.0296111498985106 | T | T | T |
| 0.1152816861885687 | 0.8266284493859927 | 0.0181680309669081 | T | T | T |
| 0.0702769724658523 | 0.8743669196775230 | 0.8042601578531841 | T | T | T |
| 0.1845864949575710 | 0.8280695330057476 | 0.6719782093062309 | T | T | T |
| 0.0788379303409230 | 0.9389742356557481 | 0.1555928922586296 | T | T | T |
| 0.1943084304168261 | 0.9686932688028178 | 0.2996623056524348 | T | T | T |
| 0.2181366254546342 | 0.9449649876537713 | 0.5229527739830354 | T | T | T |
| 0.3763014011351740 | 0.9370308155251420 | 0.5170687058937058 | T | T | T |
| 0.4340765820198905 | 0.9688228889559805 | 0.3077116564158341 | T | T | T |
| 0.3189164723110178 | 0.9371147514694000 | 0.1736584888902127 | T | T | T |
| 0.0800477411167840 | 0.1718163098773741 | 0.1751545336046381 | T | T | T |
| 0.1969624985597516 | 0.1269231232159061 | 0.3072204674462259 | T | T | T |
| 0.2330971695009784 | 0.1682144104165458 | 0.5249058606284274 | T | T | T |
| 0.3881160105223170 | 0.1738573573948573 | 0.5171913310430385 | T | T | T |
| 0.4359010135126813 | 0.1270661236005828 | 0.3046718175034934 | T | T | T |
| 0.3192524080261971 | 0.1695292640692629 | 0.1712427723788024 | T | T | T |
| 0.5749417613498665 | 0.5534927618321951 | 0.3598264195633850 | T | T | T |
| 0.6902519922721997 | 0.5237091427976505 | 0.2070064171021972 | T | T | T |
| 0.7072209201112407 | 0.5698963975990159 | 0.9951847381888033 | T | T | T |
| 0.8660477862813888 | 0.5735258584725235 | 0.9877365126611946 | T | T | T |
| 0.9299970707379708 | 0.5330173296640757 | 0.1924380416378488 | T | T | T |

**Structure files (CONTCAR) involved in this work:**

|                    |                    |                    |   |   |   |
|--------------------|--------------------|--------------------|---|---|---|
| 0.8151403094878947 | 0.5550077540691656 | 0.3338835206345092 | T | T | T |
| 0.5759513748107972 | 0.3268108179304135 | 0.3472171362362648 | T | T | T |
| 0.6983289376774706 | 0.3674621710523083 | 0.2113703924020932 | T | T | T |
| 0.7283034943736630 | 0.3234403774049931 | 0.9955216465076486 | T | T | T |
| 0.8824135297103877 | 0.3264794641029761 | 0.9930786665663177 | T | T | T |
| 0.9350343581261792 | 0.3747537576021940 | 0.1984073539534795 | T | T | T |
| 0.8249595885254617 | 0.3344482174690689 | 0.3408574854343559 | T | T | T |
| 0.7946611570359551 | 0.4668358322474175 | 0.7161358496058372 | T | T | T |
| 0.7737199229539644 | 0.4388997898051951 | 0.4827795937820307 | T | T | T |
| 0.6170585265633117 | 0.4334937068227898 | 0.4951470713945301 | T | T | T |
| 0.5726851312585874 | 0.4721034132430544 | 0.7081825047040706 | T | T | T |
| 0.6777824215411073 | 0.4373833620639992 | 0.8650953795828763 | T | T | T |
| 0.9231707998952366 | 0.6730936014994611 | 0.8312601231338235 | T | T | T |
| 0.7622907559466127 | 0.6664479272460234 | 0.4712369030062050 | T | T | T |
| 0.6088339160672107 | 0.6720728080883152 | 0.4861071692329581 | T | T | T |
| 0.5578412585349019 | 0.6304993950641291 | 0.7007467893093777 | T | T | T |
| 0.6680290782207960 | 0.6798083098546652 | 0.8382362906085816 | T | T | T |
| 0.5789629340423955 | 0.9436329129618733 | 0.3544282875969520 | T | T | T |
| 0.6949338751003655 | 0.9792662194422938 | 0.2090652586705381 | T | T | T |
| 0.7183995469012260 | 0.9438948305542156 | 0.9874939211901470 | T | T | T |
| 0.8767155560908423 | 0.9308707538440617 | 0.9882905085943182 | T | T | T |
| 0.9345915549383100 | 0.9652149018685420 | 0.1999258918128657 | T | T | T |
| 0.8178919627391489 | 0.9387547229305411 | 0.3329117529013944 | T | T | T |
| 0.5806192915252724 | 0.1739704864929789 | 0.3329028523272352 | T | T | T |
| 0.6958638833149643 | 0.1367726554940012 | 0.1939504251588590 | T | T | T |
| 0.7302819386847369 | 0.1670130030226638 | 0.9742521556371985 | T | T | T |
| 0.8843316101758200 | 0.1704029381149567 | 0.9883540236656011 | T | T | T |
| 0.9352290452479880 | 0.1242975910657410 | 0.2016833674737556 | T | T | T |
| 0.8180812223560701 | 0.1761507462590362 | 0.3236938024214652 | T | T | T |
| 0.9188113745381471 | 0.0572381741359204 | 0.8494933104692738 | T | T | T |
| 0.8071775559755990 | 0.0356664046264985 | 0.6945733646406533 | T | T | T |
| 0.7825783664324091 | 0.0610104532000292 | 0.4763419785127166 | T | T | T |
| 0.6243524119366959 | 0.0655241643862209 | 0.4889401114461029 | T | T | T |
| 0.5699917863388365 | 0.0305681790228497 | 0.6965510689751764 | T | T | T |
| 0.6868282494132931 | 0.0608471688979763 | 0.8289090879160680 | T | T | T |
| 0.9250819431194255 | 0.8276365806904838 | 0.8287325393881955 | T | T | T |
| 0.7655304393596951 | 0.8251902240726999 | 0.4715346778586970 | T | T | T |
| 0.6127356896086475 | 0.8258209500603032 | 0.4900789621661096 | T | T | T |
| 0.5621666226828864 | 0.8747813311221948 | 0.6965114471814281 | T | T | T |
| 0.6722773218134234 | 0.8334269914724327 | 0.8413517443194382 | T | T | T |
| 0.4258101597392652 | 0.4444649311829623 | 0.6454057214825297 | T | T | T |
| 0.3048961105765038 | 0.4699614141529111 | 0.7876737331145203 | T | T | T |
| 0.2826446341163345 | 0.4380618424958657 | 0.0128358355496152 | T | T | T |
| 0.1229098133353889 | 0.4326990026398489 | 0.0110015087383340 | T | T | T |
| 0.0723981881140318 | 0.4730027781217587 | 0.7993932326508797 | T | T | T |
| 0.1793771504692244 | 0.4389006461065837 | 0.6522525108088908 | T | T | T |
| 0.4165537151110919 | 0.6747047709652738 | 0.6592173317029103 | T | T | T |
| 0.2992108922984579 | 0.6295209911262933 | 0.7969461285819479 | T | T | T |
| 0.2717101439521378 | 0.6720385269222693 | 0.0186767137121045 | T | T | T |
| 0.1182948117868577 | 0.6727756602445566 | 0.0096567273317828 | T | T | T |
| 0.0698371870450460 | 0.6281655136817033 | 0.8011653850887592 | T | T | T |
| 0.1792987147547782 | 0.6708097560398981 | 0.6622768618835837 | T | T | T |
| 0.0753612353750781 | 0.5571462535684427 | 0.1414652975830314 | T | T | T |

**Structure files (CONTCAR) involved in this work:**

|                    |                    |                    |   |   |   |
|--------------------|--------------------|--------------------|---|---|---|
| 0.1963087871920005 | 0.5308557671897722 | 0.2817906570143994 | T | T | T |
| 0.2173439925244395 | 0.5589247517066815 | 0.5085262565128489 | T | T | T |
| 0.3782429424815399 | 0.5672185235872466 | 0.5086172167801811 | T | T | T |
| 0.4322462964244397 | 0.5262941668946584 | 0.2978056787666518 | T | T | T |
| 0.3241530634644335 | 0.5597204401359475 | 0.1509383152564279 | T | T | T |
| 0.0791972610830468 | 0.3260606358616489 | 0.1629560169713504 | T | T | T |
| 0.1983188859528910 | 0.3713861538189234 | 0.2974046487277098 | T | T | T |
| 0.2315675029588007 | 0.3292922025437747 | 0.5166257450424226 | T | T | T |
| 0.3868006812069530 | 0.3272574795551995 | 0.5107831404213300 | T | T | T |
| 0.4356195889344823 | 0.3687282839849609 | 0.2974339538660932 | T | T | T |
| 0.3210240586118147 | 0.3264937869313697 | 0.1653408079509196 | T | T | T |
| 0.9207694258018799 | 0.4455419053037601 | 0.8561382001053678 | T | T | T |
| 0.7931793294309362 | 0.6299801155092478 | 0.7014727152350957 | T | T | T |
| 0.7986686678261569 | 0.8721555904451197 | 0.6972674172561484 | T | T | T |
| 0.3610926640756314 | 0.0669000174446587 | 0.7278873047747978 | T | T | T |
| 0.3181620052194458 | 0.0496362443012651 | 0.9127066723099437 | T | T | T |
| 0.2016817604814236 | 0.0512387933218127 | 0.0076663366084278 | T | T | T |
| 0.0881607460728656 | 0.0695967495578892 | 0.9099950510835367 | T | T | T |
| 0.1046130930515905 | 0.0662169169488953 | 0.7135010841401798 | T | T | T |
| 0.2313225535646064 | 0.0509898409759926 | 0.7653468253723629 | T | T | T |
| 0.3632669713857657 | 0.8250851548459399 | 0.7616282050066155 | T | T | T |
| 0.3056351674725806 | 0.8608734987092399 | 0.9299793672788801 | T | T | T |
| 0.1912310027701821 | 0.8548870709208782 | 0.0273586091160779 | T | T | T |
| 0.0913903079647904 | 0.8325240479765506 | 0.9032068387517175 | T | T | T |
| 0.1082324456130573 | 0.8414130596303091 | 0.7081650074140937 | T | T | T |
| 0.2326412657528927 | 0.8435588055430794 | 0.7671581701586473 | T | T | T |
| 0.3152351022007781 | 0.9482324868886052 | 0.7800471115773648 | T | T | T |
| 0.0907298084787965 | 0.9529088417307575 | 0.8157036746824339 | T | T | T |
| 0.4339765851047047 | 0.1277801288713011 | 0.5897776233768177 | T | T | T |
| 0.4147712522989997 | 0.9963401988627419 | 0.5766298293173986 | T | T | T |
| 0.3841952899738281 | 0.8656036639715131 | 0.5746160822907452 | T | T | T |
| 0.1970344214674672 | 0.1373386373346602 | 0.6230195278628082 | T | T | T |
| 0.1877691466393547 | 0.0049249082493541 | 0.5905124473385424 | T | T | T |
| 0.2039688499866974 | 0.8725312763124488 | 0.5751639390803145 | T | T | T |
| 0.9872838712060458 | 0.0375542197481207 | 0.7907544945566719 | T | T | T |
| 0.9906811582558189 | 0.8677365302536600 | 0.7878527931914370 | T | T | T |
| 0.1425432134233627 | 0.9280409846990455 | 0.2286745099390210 | T | T | T |
| 0.1815452335294759 | 0.9468742210335553 | 0.4147351802717489 | T | T | T |
| 0.2977162193441711 | 0.9562924457176394 | 0.5087487103213770 | T | T | T |
| 0.4090846362660968 | 0.9290758992828982 | 0.4070416403063467 | T | T | T |
| 0.3957441687515523 | 0.9399376493031945 | 0.2101360088965966 | T | T | T |
| 0.2706445445511780 | 0.9496504350699480 | 0.2698558396123313 | T | T | T |
| 0.1380499796994810 | 0.1730039828523037 | 0.2601764053491595 | T | T | T |
| 0.1970130712597633 | 0.1368713321814448 | 0.4270106836111183 | T | T | T |
| 0.3114336406017273 | 0.1469053266158269 | 0.5235893550052843 | T | T | T |
| 0.4138580046486891 | 0.1695645432555704 | 0.4026867234753679 | T | T | T |
| 0.3957326390684486 | 0.1560395087656995 | 0.2078109776842588 | T | T | T |
| 0.2693723965362641 | 0.1486375295094119 | 0.2625412176070191 | T | T | T |
| 0.1816388080967966 | 0.0485722922919471 | 0.2811623753549214 | T | T | T |
| 0.4177077004833094 | 0.0483920484615488 | 0.3218926532754490 | T | T | T |
| 0.0674666091401903 | 0.8703054742585423 | 0.0914917243787226 | T | T | T |
| 0.0887202020997497 | 0.0013551065898695 | 0.0791806456794147 | T | T | T |
| 0.1081513229273886 | 0.1336859992540137 | 0.0766705449679728 | T | T | T |

**Structure files (CONTCAR) involved in this work:**

|                    |                    |                    |   |   |   |
|--------------------|--------------------|--------------------|---|---|---|
| 0.3053001212137453 | 0.8631083720983015 | 0.1273937374056699 | T | T | T |
| 0.3063437736119450 | 0.9939357579675751 | 0.0895769717917089 | T | T | T |
| 0.3030807004519511 | 0.1267411716564181 | 0.0710633428061071 | T | T | T |
| 0.5127714552015775 | 0.9559155654781624 | 0.2870654867265163 | T | T | T |
| 0.5158168986644390 | 0.1352403771320726 | 0.2867084122036861 | T | T | T |
| 0.6433991383267195 | 0.5515820253646567 | 0.2962738685323241 | T | T | T |
| 0.6744306263852258 | 0.5662332211237232 | 0.1067594075268851 | T | T | T |
| 0.7865763517461467 | 0.5811740224269415 | 0.0072707111856239 | T | T | T |
| 0.9032378864127200 | 0.5743756764523962 | 0.0965094842027828 | T | T | T |
| 0.8918071225696406 | 0.5561110508005365 | 0.2944794412410956 | T | T | T |
| 0.7678819307172077 | 0.5329267540157678 | 0.2407411372597877 | T | T | T |
| 0.6453932507798533 | 0.3326619916908674 | 0.2863155515890600 | T | T | T |
| 0.7013059412358654 | 0.3234393950175801 | 0.1102209937303375 | T | T | T |
| 0.8042183586818419 | 0.3523081027694779 | 0.9884844959259620 | T | T | T |
| 0.9053026728895889 | 0.3271835422789575 | 0.1109751116030387 | T | T | T |
| 0.9004561155224033 | 0.3527974581124375 | 0.3047076010375554 | T | T | T |
| 0.7721411271291349 | 0.3671298685383101 | 0.2628511345675492 | T | T | T |
| 0.6762441059795415 | 0.4442064122116057 | 0.1870155456235063 | T | T | T |
| 0.9187085989818770 | 0.4529047357496452 | 0.1743010060254747 | T | T | T |
| 0.5648559126589190 | 0.6275691993070869 | 0.4082557702734037 | T | T | T |
| 0.5777167090660115 | 0.4981842492457854 | 0.4497464128208371 | T | T | T |
| 0.5831592806741479 | 0.3644503868494800 | 0.4548091520124068 | T | T | T |
| 0.7947312995387823 | 0.6288439366464931 | 0.3749286781058670 | T | T | T |
| 0.8084500336054022 | 0.5014793782980146 | 0.4256894664702360 | T | T | T |
| 0.8126531316861246 | 0.3691764774780824 | 0.4509412880057642 | T | T | T |
| 0.0090336135854834 | 0.5491180952703226 | 0.2096816477544430 | T | T | T |
| 0.0153302967836384 | 0.3648246744297021 | 0.2113453157406734 | T | T | T |
| 0.8665039084401250 | 0.4288967903071900 | 0.7478708666504983 | T | T | T |
| 0.7850694637320430 | 0.4444328166892452 | 0.6008231348091796 | T | T | T |
| 0.6946161154381008 | 0.4354679644132332 | 0.4573546530162133 | T | T | T |
| 0.6115180301449518 | 0.4352356252290897 | 0.6157917360834192 | T | T | T |
| 0.6051364263110588 | 0.4459411078307328 | 0.8120683181403504 | T | T | T |
| 0.7357255044734500 | 0.4325779991358278 | 0.7805308457381392 | T | T | T |
| 0.8723003717832130 | 0.6677721480443777 | 0.7348647672631988 | T | T | T |
| 0.8044742532361525 | 0.6483276184978051 | 0.5719130013943866 | T | T | T |
| 0.6850621858870416 | 0.6426773939399116 | 0.4879133302343168 | T | T | T |
| 0.5767893027336275 | 0.6672984326595962 | 0.5964196685399221 | T | T | T |
| 0.5925914035334003 | 0.6693305868939770 | 0.7928813637962820 | T | T | T |
| 0.7236106085552553 | 0.6650431621226489 | 0.7542707303267211 | T | T | T |
| 0.7996396431024501 | 0.5458200812000764 | 0.7287925519826836 | T | T | T |
| 0.5824779453790505 | 0.5527114957007906 | 0.6965703047039286 | T | T | T |
| 0.9289013414152688 | 0.3727125346555953 | 0.9250783150217655 | T | T | T |
| 0.8831553587832783 | 0.5082423772449087 | 0.9239414643466105 | T | T | T |
| 0.8895397295140580 | 0.6424730328846355 | 0.9305739336182499 | T | T | T |
| 0.6776521731394280 | 0.3677402586403752 | 0.9277007075666927 | T | T | T |
| 0.6922208092026864 | 0.4992638704275705 | 0.9395016771276382 | T | T | T |
| 0.6732914296868928 | 0.6312248695046054 | 0.9357288804449038 | T | T | T |
| 0.4937411098284343 | 0.4534158853307277 | 0.7095960377275065 | T | T | T |
| 0.4767415710756979 | 0.6340800285709741 | 0.7142782492189895 | T | T | T |
| 0.6433816635355132 | 0.9389382411407997 | 0.2809781819099354 | T | T | T |
| 0.6817815866148652 | 0.9619824577587095 | 0.0927721381843727 | T | T | T |
| 0.7972372583499120 | 0.9312292474044832 | 0.0082975150721784 | T | T | T |
| 0.9154373903532815 | 0.9296738735285822 | 0.0949402191244021 | T | T | T |



**Structure files (CONTCAR) involved in this work:**

|                    |                    |                    |   |   |   |
|--------------------|--------------------|--------------------|---|---|---|
| 0.8943389613298882 | 0.9301609184698967 | 0.2923575082844974 | T | T | T |
| 0.7709285378236843 | 0.9576015901133004 | 0.2379915354812148 | T | T | T |
| 0.6371842486445403 | 0.1805943223160728 | 0.2463604820838150 | T | T | T |
| 0.6899244113642505 | 0.1433905848288888 | 0.0739616118508653 | T | T | T |
| 0.8077222706342068 | 0.1421013889031580 | 0.9841728403548278 | T | T | T |
| 0.9133788870916641 | 0.1629658674429642 | 0.1009024826685524 | T | T | T |
| 0.8946353252339897 | 0.1564822010116753 | 0.2954948377447283 | T | T | T |
| 0.7694417024419755 | 0.1640551573487875 | 0.2275779421442883 | T | T | T |
| 0.6856866490701358 | 0.0592732975432010 | 0.2298718029517313 | T | T | T |
| 0.9173809873919219 | 0.0447636173492354 | 0.1938680326866521 | T | T | T |
| 0.5702607715082959 | 0.8734941688266192 | 0.4151393465689355 | T | T | T |
| 0.5845567828141538 | 0.0047435002253469 | 0.4342664274542180 | T | T | T |
| 0.6108581078522427 | 0.1353061062266716 | 0.4295615043318388 | T | T | T |
| 0.7970140596453840 | 0.8659548285573082 | 0.3775692877135857 | T | T | T |
| 0.8152167649744536 | 0.9976432438001309 | 0.4164082182799239 | T | T | T |
| 0.7930488873316350 | 0.1312831142058779 | 0.4170667319224997 | T | T | T |
| 0.0131699756565005 | 0.9521889394189028 | 0.2240393589636424 | T | T | T |
| 0.0149296245500187 | 0.1334767557320545 | 0.2205982785943766 | T | T | T |
| 0.8604920793016708 | 0.0719788885843159 | 0.7690924347181035 | T | T | T |
| 0.8191608950489788 | 0.0674548893390330 | 0.5834847262382415 | T | T | T |
| 0.7031809177575048 | 0.0470888020786558 | 0.4892805840457146 | T | T | T |
| 0.5963430882521920 | 0.0747669915232958 | 0.6019413167502644 | T | T | T |
| 0.6090934856791685 | 0.0496167798195947 | 0.7987092207849115 | T | T | T |
| 0.7314908953709607 | 0.0564887966114031 | 0.7282185419859873 | T | T | T |
| 0.8713330752280923 | 0.8304673100772070 | 0.7388838470131897 | T | T | T |
| 0.8095971759187974 | 0.8401641118486333 | 0.5722226253561061 | T | T | T |
| 0.6900158235502419 | 0.8519322501489169 | 0.4920394773847085 | T | T | T |
| 0.5836280373738121 | 0.8274631869994575 | 0.6028169645070997 | T | T | T |
| 0.5972916146500918 | 0.8503731190759040 | 0.7988340418117464 | T | T | T |
| 0.7265167324663017 | 0.8489350542374414 | 0.7559765310962867 | T | T | T |
| 0.8162104995712890 | 0.9561755241735519 | 0.6959292924116822 | T | T | T |
| 0.5818830541862556 | 0.9518430545357104 | 0.6690715115846853 | T | T | T |
| 0.9307877266037626 | 0.1255629495233984 | 0.9140782992862899 | T | T | T |
| 0.8992257372886127 | 0.9962977435007873 | 0.9249224954855944 | T | T | T |
| 0.8970551235783968 | 0.8622446342287237 | 0.9301246360798797 | T | T | T |
| 0.6940548432328165 | 0.1348520367425751 | 0.8777129474604655 | T | T | T |
| 0.7112571083478016 | 0.0060498560231297 | 0.9104624747629106 | T | T | T |
| 0.6835214456878663 | 0.8775808462394254 | 0.9425920263631755 | T | T | T |
| 0.4916254646191657 | 0.0460874715238193 | 0.7185532224535590 | T | T | T |
| 0.4816589978597356 | 0.8696512950331283 | 0.7110030424682722 | T | T | T |
| 0.3627193773246595 | 0.4355231298880261 | 0.7204279401864805 | T | T | T |
| 0.3063443205988735 | 0.4360287937770170 | 0.8973276558638543 | T | T | T |
| 0.2024459490088031 | 0.4453996566567197 | 0.0253408964693047 | T | T | T |
| 0.1052474807785710 | 0.4329950393405025 | 0.8935090770996592 | T | T | T |
| 0.1041821717097266 | 0.4414580724495754 | 0.6968455131814022 | T | T | T |
| 0.2317230158867324 | 0.4573501748509980 | 0.7402597885188237 | T | T | T |
| 0.3503897282467276 | 0.6724372063187870 | 0.7293741586745267 | T | T | T |
| 0.3037212652597372 | 0.6558140094358996 | 0.9103954103355726 | T | T | T |
| 0.1946028971198266 | 0.6457359410278047 | 0.0221798964306215 | T | T | T |
| 0.0996484969801672 | 0.6735181318325613 | 0.8910543434904870 | T | T | T |
| 0.0979130021281754 | 0.6638188242742178 | 0.6938410918568801 | T | T | T |
| 0.2232867902801374 | 0.6424063391627491 | 0.7543616080726665 | T | T | T |
| 0.3178615767505596 | 0.5505764418062518 | 0.7923178704806344 | T | T | T |

**Structure files (CONTCAR) involved in this work:**

|                    |                    |                     |   |   |   |
|--------------------|--------------------|---------------------|---|---|---|
| 0.0975032118885600 | 0.5521497606385085 | 0.8056821068857315  | T | T | T |
| 0.4326443859328494 | 0.3770173485352550 | 0.5777698732905457  | T | T | T |
| 0.4155639259176642 | 0.5089755210303921 | 0.5724167695026474  | T | T | T |
| 0.3983498841151799 | 0.6405804655796657 | 0.55214427111105180 | T | T | T |
| 0.1936014078697268 | 0.3637038095581733 | 0.6106445535201183  | T | T | T |
| 0.1855552490957200 | 0.4933881195054049 | 0.5619618802451359  | T | T | T |
| 0.1898691851168345 | 0.6278009035836831 | 0.5612429222927214  | T | T | T |
| 0.9934342813492899 | 0.4682451685103960 | 0.7956744778525027  | T | T | T |
| 0.9895616006534133 | 0.6296656465306264 | 0.8001422998147597  | T | T | T |
| 0.1396770128736566 | 0.5668935864767621 | 0.2140492913566394  | T | T | T |
| 0.1915905126650672 | 0.5606785178331893 | 0.3942753778560693  | T | T | T |
| 0.2979477021858133 | 0.5558977001169613 | 0.5168492596202157  | T | T | T |
| 0.4018611270344035 | 0.5659957855556003 | 0.3933783170668627  | T | T | T |
| 0.3988722039812868 | 0.5558540228439044 | 0.1967085558731849  | T | T | T |
| 0.2704975788546737 | 0.5469182849203402 | 0.2399777732315130  | T | T | T |
| 0.1409463151907382 | 0.3286530643711590 | 0.2413231844838938  | T | T | T |
| 0.1950453189921530 | 0.3543828229249630 | 0.4153054424177933  | T | T | T |
| 0.3094585451721475 | 0.3529284398243565 | 0.5151963563709511  | T | T | T |
| 0.4123821255227763 | 0.3273002046507337 | 0.3959365636321241  | T | T | T |
| 0.3981167114073784 | 0.3377833896919787 | 0.2000683380016556  | T | T | T |
| 0.2719846168628948 | 0.3520542486892809 | 0.2550652428614461  | T | T | T |
| 0.1831689308544492 | 0.4505606261271688 | 0.2802073455709345  | T | T | T |
| 0.4148275388743175 | 0.4470422573731293 | 0.3110655877714115  | T | T | T |
| 0.0683476706627998 | 0.6237507926039109 | 0.0709339756503198  | T | T | T |
| 0.0827848309204893 | 0.4920618602517587 | 0.0690523035553060  | T | T | T |
| 0.1014041116958915 | 0.3604780963845167 | 0.0577595543247090  | T | T | T |
| 0.3141313882364710 | 0.6343868024501111 | 0.1048044713440114  | T | T | T |
| 0.3168584969202710 | 0.5033221456386606 | 0.0643152870520976  | T | T | T |
| 0.3069931986243419 | 0.3683727968135397 | 0.0637493571824081  | T | T | T |
| 0.5121353489675753 | 0.5372734034985521 | 0.2873838508947950  | T | T | T |
| 0.5159313718921985 | 0.3612289635813381 | 0.2822186416295980  | T | T | T |
| 0.4370345998130961 | 0.7523286763715317 | 0.6393833325906280  | T | T | T |
| 0.1919329956370166 | 0.7493671462613023 | 0.6382770172175288  | T | T | T |
| 0.2751622209205259 | 0.7517207935752590 | 0.0377414461234651  | T | T | T |
| 0.1110595209801204 | 0.7485457849920881 | 0.0527477349353969  | T | T | T |
| 0.0606284372486473 | 0.2479161292270824 | 0.1431191229611066  | T | T | T |
| 0.3081418419254626 | 0.2477663499468472 | 0.1422580950110822  | T | T | T |
| 0.2253848291328530 | 0.2488747490497403 | 0.5272163397281334  | T | T | T |
| 0.3925261037731135 | 0.2514073044490882 | 0.5545088751408139  | T | T | T |
| 0.5587716317550417 | 0.2486981857881522 | 0.3688321147982604  | T | T | T |
| 0.8150287959291911 | 0.2546355790576247 | 0.3560781978805664  | T | T | T |
| 0.7262232793806516 | 0.2469352458320703 | 0.9566302695220721  | T | T | T |
| 0.8865873652479741 | 0.2484838059682741 | 0.9556475031828958  | T | T | T |
| 0.9447228760163755 | 0.7501581470149083 | 0.8547181997856033  | T | T | T |
| 0.6740111815613057 | 0.7561218783926652 | 0.8793489875393425  | T | T | T |
| 0.7641531603591903 | 0.7460456783879191 | 0.4443871803533015  | T | T | T |
| 0.6077414502331298 | 0.7494350667909175 | 0.4482868363397325  | T | T | T |
| 0.9184995927719951 | 0.3744383708033158 | 0.5999456412124592  | T | T | T |
| 0.0182149730415772 | 0.8049001304787181 | 0.5231102213230164  | T | T | T |
| 0.9787495263062811 | 0.6838435981892674 | 0.4546151599277580  | T | T | T |
| 0.9609215455778637 | 0.4216072433779497 | 0.5461309753715979  | T | T | T |
| 0.1408043161371895 | 0.7202633419598081 | 0.3519559905003256  | T | T | T |
| 0.9567162457285455 | 0.7734281898914388 | 0.4185621263278921  | T | T | T |

**Structure files (CONTCAR) involved in this work:**

|                    |                    |                    |   |   |   |
|--------------------|--------------------|--------------------|---|---|---|
| 0.0290683556073645 | 0.7157505618458764 | 0.5736258428663120 | T | T | T |
| 0.9125123198707017 | 0.8015171796594923 | 0.5737833483152798 | T | T | T |
| 0.9154534620028237 | 0.6955227606030026 | 0.5898206530893543 | T | T | T |
| 0.8814996572748012 | 0.3616972791697720 | 0.5551808536255847 | T | T | T |
| 0.9394230523588691 | 0.4725583490647945 | 0.5484577885923083 | T | T | T |
| 0.9658969196714846 | 0.4052200611025593 | 0.4681739781604336 | T | T | T |
| 0.0096064823766787 | 0.4213575144807673 | 0.5833158383706273 | T | T | T |
| 0.8903846641271057 | 0.4035255418977884 | 0.6848975758681372 | T | T | T |
| 0.1050967535667662 | 0.7460426062261604 | 0.3028848181158650 | T | T | T |
| 0.1871147208515757 | 0.7102286311273692 | 0.3106985829676990 | T | T | T |
| 0.1518195019498433 | 0.7522610242468510 | 0.4166988883265971 | T | T | T |
| 0.1191043572043057 | 0.6724717483201729 | 0.3764837118601356 | T | T | T |

**Figure S10 Mo-TS**

Si Al O C Mo H

|                     |                     |                     |   |   |   |
|---------------------|---------------------|---------------------|---|---|---|
| 1.0000000000000000  |                     |                     |   |   |   |
| 20.0219999999999985 | 0.0000000000000000  | 0.0000000000000000  |   |   |   |
| 0.0000000000000000  | 19.8990000000000009 | 0.0000000000000000  |   |   |   |
| 0.0000000000000000  | 0.0000000000000000  | 13.3829999999999991 |   |   |   |
| 93                  | 3                   | 193                 | 4 | 4 | 9 |

Selective dynamics

Direct

|                    |                    |                    |   |   |   |
|--------------------|--------------------|--------------------|---|---|---|
| 0.4244231827953097 | 0.0575374876032357 | 0.6553524317358952 | T | T | T |
| 0.3063875282926656 | 0.0284084201456036 | 0.7996717241587940 | T | T | T |
| 0.2810835927874104 | 0.0573503298194975 | 0.0227662149766350 | T | T | T |
| 0.1210498210238972 | 0.0630773217381503 | 0.0206384853841868 | T | T | T |
| 0.0663730442213009 | 0.0280171531720626 | 0.8080706121640362 | T | T | T |
| 0.1798112966676097 | 0.0623449050449701 | 0.6737157203815114 | T | T | T |
| 0.4149228257580991 | 0.8269316218302741 | 0.6681382617878608 | T | T | T |
| 0.3045944654574489 | 0.8690548599475951 | 0.8127107666634775 | T | T | T |
| 0.2695216345743511 | 0.8308967269301174 | 0.0312425736954734 | T | T | T |
| 0.1155578485238459 | 0.8258202552005062 | 0.0163800426418777 | T | T | T |
| 0.0693141642536722 | 0.8709434067485838 | 0.8012142064495261 | T | T | T |
| 0.1864158267423245 | 0.8266943909456751 | 0.6744360045235132 | T | T | T |
| 0.0789476719524093 | 0.9377983856346468 | 0.1568393802847097 | T | T | T |
| 0.1938434204247141 | 0.9684484705544244 | 0.3017420730277233 | T | T | T |
| 0.2176216610642558 | 0.9437973708586298 | 0.5243346787239148 | T | T | T |
| 0.3753852680523412 | 0.9368494282248867 | 0.5174548580220575 | T | T | T |
| 0.4333000155555161 | 0.9698851417273922 | 0.3075778080327929 | T | T | T |
| 0.3181809171103236 | 0.9381649580591364 | 0.1743041550094024 | T | T | T |
| 0.0795754521574302 | 0.1720353151983550 | 0.1749043233696085 | T | T | T |
| 0.1960814670172286 | 0.1270545918827611 | 0.3096689653468748 | T | T | T |
| 0.2330337217312378 | 0.1667918589309916 | 0.5278134448436340 | T | T | T |
| 0.3871508768612126 | 0.1721473817984047 | 0.5182623980405351 | T | T | T |
| 0.4355319103118962 | 0.1281853567503558 | 0.3051225978189563 | T | T | T |
| 0.3179298844196873 | 0.1705187288642012 | 0.1745958149107327 | T | T | T |
| 0.5759545491223073 | 0.5526297413469102 | 0.3575219554585758 | T | T | T |
| 0.6912729608393469 | 0.5234029132677676 | 0.2038625361123538 | T | T | T |
| 0.7100941408165961 | 0.5709842920258803 | 0.9932220021250063 | T | T | T |
| 0.8677714054988437 | 0.5722562051391766 | 0.9857085837357812 | T | T | T |
| 0.9313708110329548 | 0.5343750629364671 | 0.1918712740433300 | T | T | T |
| 0.8152042962720820 | 0.5566985395137451 | 0.3314344259255875 | T | T | T |
| 0.5768925893337613 | 0.3268820985574538 | 0.3486413468786535 | T | T | T |
| 0.6993655911701647 | 0.3672551087146800 | 0.2113722800738999 | T | T | T |

**Structure files (CONTCAR) involved in this work:**

|                    |                    |                    |   |   |   |
|--------------------|--------------------|--------------------|---|---|---|
| 0.7295130211103503 | 0.3223564465671518 | 0.9965171638121643 | T | T | T |
| 0.8839566462591824 | 0.3248729380134177 | 0.9933317555612479 | T | T | T |
| 0.9361665550499653 | 0.3756949361474077 | 0.1992239324578154 | T | T | T |
| 0.8259426342859011 | 0.3355212590230974 | 0.3425638707835055 | T | T | T |
| 0.7965608523122685 | 0.4688516295085278 | 0.7162743098869457 | T | T | T |
| 0.7753630823948744 | 0.4410972451892038 | 0.4824893202497334 | T | T | T |
| 0.6188446086022370 | 0.4342221648377173 | 0.4954349155835356 | T | T | T |
| 0.5748211150775200 | 0.4713517891303328 | 0.7097793076440460 | T | T | T |
| 0.6816920552822745 | 0.4373324054455975 | 0.8652464065556547 | T | T | T |
| 0.9257789540826419 | 0.6718147622283175 | 0.8250665029449327 | T | T | T |
| 0.7612555924652383 | 0.6667943216667063 | 0.4702908602358829 | T | T | T |
| 0.6079502815833957 | 0.6712428138517270 | 0.4839254878526167 | T | T | T |
| 0.5585077542275099 | 0.6301858569038895 | 0.6999765934580088 | T | T | T |
| 0.6705422883776019 | 0.6816735173594634 | 0.8367883614763107 | T | T | T |
| 0.5777389545308260 | 0.9438346603850734 | 0.3547173525259387 | T | T | T |
| 0.6968187275443788 | 0.9795513757350848 | 0.2125305918597792 | T | T | T |
| 0.7171007634155379 | 0.9424406581923047 | 0.9889605166961196 | T | T | T |
| 0.8754060871447433 | 0.9292926114527887 | 0.9902101352978869 | T | T | T |
| 0.9342552219640280 | 0.9641022688242242 | 0.2050488501488980 | T | T | T |
| 0.8187848006578961 | 0.9374730526389796 | 0.3381587979573120 | T | T | T |
| 0.5808106221226148 | 0.1736040954827696 | 0.3346158326737591 | T | T | T |
| 0.6978817073870935 | 0.1374126299878326 | 0.1961765730315822 | T | T | T |
| 0.7299090485813829 | 0.1661529724332988 | 0.9752545231640112 | T | T | T |
| 0.8843879041223583 | 0.1678128437756769 | 0.9904917540325913 | T | T | T |
| 0.9353344810608556 | 0.1235712503066982 | 0.2067266529220208 | T | T | T |
| 0.8183692520470238 | 0.1781791638175839 | 0.3255517627184539 | T | T | T |
| 0.9178059456703098 | 0.0553912394411203 | 0.8505260534704041 | T | T | T |
| 0.8073004568986309 | 0.0366651701707262 | 0.6943001469335409 | T | T | T |
| 0.7822536079088579 | 0.0617046584130775 | 0.4764426887072033 | T | T | T |
| 0.6241016601225262 | 0.0642829460837341 | 0.4904843525336369 | T | T | T |
| 0.5699679928301012 | 0.0288950164843263 | 0.6979784166709816 | T | T | T |
| 0.6872135687341538 | 0.0592394860348465 | 0.8303528547136346 | T | T | T |
| 0.9248194004320864 | 0.8266273291094927 | 0.8323527938612765 | T | T | T |
| 0.7623826815821293 | 0.8249409941385288 | 0.4776088622491284 | T | T | T |
| 0.6100843407868363 | 0.8254525220357193 | 0.4883221859857468 | T | T | T |
| 0.5596228259117200 | 0.8732663037463304 | 0.6958655102026524 | T | T | T |
| 0.6668357604941783 | 0.8352432518193519 | 0.8467036234230351 | T | T | T |
| 0.4289752704373512 | 0.4423658399475008 | 0.6487796559621765 | T | T | T |
| 0.3052922553509137 | 0.4706987180787683 | 0.7879001161207662 | T | T | T |
| 0.2842609113097884 | 0.4372397370075656 | 0.0133120855494395 | T | T | T |
| 0.1250252174326747 | 0.4329180327355658 | 0.0145164433725786 | T | T | T |
| 0.0749831895684595 | 0.4746022235126282 | 0.8024795644510322 | T | T | T |
| 0.1790900057151893 | 0.4391610342508257 | 0.6509479930030799 | T | T | T |
| 0.4162816421344094 | 0.6733619853882902 | 0.6619626253092609 | T | T | T |
| 0.3017183009643300 | 0.6302490031794399 | 0.8054603793624454 | T | T | T |
| 0.2728268772429734 | 0.6711387273402248 | 0.0237962054309836 | T | T | T |
| 0.1192146550500005 | 0.6722104267243127 | 0.0087430990183565 | T | T | T |
| 0.0727364040807534 | 0.6296330057861714 | 0.7967109384238286 | T | T | T |
| 0.1853251388682402 | 0.6703663959284605 | 0.6688776715434941 | T | T | T |
| 0.0777001055730124 | 0.5574316216228200 | 0.1459311985163955 | T | T | T |
| 0.1976383428227832 | 0.5296840418886027 | 0.2882618786940522 | T | T | T |
| 0.2234597686763718 | 0.5560801412475407 | 0.5127723792718650 | T | T | T |
| 0.3819338210110957 | 0.5624014723667919 | 0.5117833642140570 | T | T | T |

**Structure files (CONTCAR) involved in this work:**

|                    |                    |                    |   |   |   |
|--------------------|--------------------|--------------------|---|---|---|
| 0.4330367071877013 | 0.5247791671406343 | 0.2995533578740940 | T | T | T |
| 0.3243203447180180 | 0.5565868525425905 | 0.1521963364483567 | T | T | T |
| 0.0794320065185398 | 0.3265405513656346 | 0.1629941633079963 | T | T | T |
| 0.1978860897154979 | 0.3713945794890618 | 0.3006419052420050 | T | T | T |
| 0.2321027855445571 | 0.3271707911468685 | 0.5197377301543363 | T | T | T |
| 0.3864521950298448 | 0.3257546962407942 | 0.5148075637786523 | T | T | T |
| 0.4356147403761020 | 0.3674623907612656 | 0.3012951531041155 | T | T | T |
| 0.3208887350451750 | 0.3277097419602329 | 0.1674860624796470 | T | T | T |
| 0.9219882106613659 | 0.4443975572037170 | 0.8568855646992615 | T | T | T |
| 0.7954317411652400 | 0.6319669852695312 | 0.6997685183164446 | T | T | T |
| 0.7943982893347128 | 0.8744387928281598 | 0.7057644184206385 | T | T | T |
| 0.3608692409690508 | 0.0661716101784397 | 0.7298368563309487 | T | T | T |
| 0.3166178390537579 | 0.0527051121464512 | 0.9141609245469318 | T | T | T |
| 0.2007615433076815 | 0.0517780168040774 | 0.0114205869617156 | T | T | T |
| 0.0878118238457787 | 0.0649487862774343 | 0.9110042704791028 | T | T | T |
| 0.1037052475347217 | 0.0650470950555455 | 0.7153221648574353 | T | T | T |
| 0.2307317391255717 | 0.0473539260973767 | 0.7659193224094912 | T | T | T |
| 0.3608815387832554 | 0.8237065272409628 | 0.7585577523892714 | T | T | T |
| 0.3085558893436847 | 0.8562684232948324 | 0.9318763103530050 | T | T | T |
| 0.1917211343973503 | 0.8540817078765712 | 0.0226603775805278 | T | T | T |
| 0.0891696213269873 | 0.8312262381754673 | 0.9026189364467896 | T | T | T |
| 0.1083886853007878 | 0.8360219997588444 | 0.7070647492112527 | T | T | T |
| 0.2312183955418358 | 0.8462558499877392 | 0.7715734750153335 | T | T | T |
| 0.3174529384943903 | 0.9477457167688609 | 0.7875503141907119 | T | T | T |
| 0.0903619719462882 | 0.9495419997071647 | 0.8106027467339408 | T | T | T |
| 0.4333821723203908 | 0.1261184958459829 | 0.5904141843219910 | T | T | T |
| 0.4144217813587056 | 0.9944213996009936 | 0.5799415681373575 | T | T | T |
| 0.3822589364448390 | 0.8640482047901076 | 0.5714236741289969 | T | T | T |
| 0.1971781660692635 | 0.1347839095479776 | 0.6251056719966989 | T | T | T |
| 0.1852688602715561 | 0.0032690529067754 | 0.5907313501122351 | T | T | T |
| 0.2048844233757337 | 0.8715600009023590 | 0.5775819090250375 | T | T | T |
| 0.9863165217439678 | 0.0336457344846307 | 0.7935956933689391 | T | T | T |
| 0.9896010707020191 | 0.8647144475675029 | 0.7834856441635537 | T | T | T |
| 0.1428100193514803 | 0.9275373091322199 | 0.2297668086491967 | T | T | T |
| 0.1814630822961899 | 0.9441582036990809 | 0.4157871353705587 | T | T | T |
| 0.2969693075679091 | 0.9572801991254177 | 0.5104463168040833 | T | T | T |
| 0.4082770061589571 | 0.9306999001006016 | 0.4072976086339863 | T | T | T |
| 0.3951419129925747 | 0.9401498770055928 | 0.2104390219564128 | T | T | T |
| 0.2704529179870216 | 0.9516121329473000 | 0.2708091345976527 | T | T | T |
| 0.1387001223676754 | 0.1727875594020719 | 0.2580517160169331 | T | T | T |
| 0.1945990138137028 | 0.1398485156024095 | 0.4289073695893807 | T | T | T |
| 0.3108755589513773 | 0.1435244632327243 | 0.5225139618797310 | T | T | T |
| 0.4139666013041119 | 0.1697022232834124 | 0.4042144027136030 | T | T | T |
| 0.3950120561545043 | 0.1581333648025396 | 0.2092311319977653 | T | T | T |
| 0.2693327091162852 | 0.1472072205961904 | 0.2662459476613462 | T | T | T |
| 0.1798334868518159 | 0.0484176260077853 | 0.2867270534626132 | T | T | T |
| 0.4169397535090856 | 0.0494944936358848 | 0.3207245824218031 | T | T | T |
| 0.0687338321134562 | 0.8700705049675787 | 0.0905451082856977 | T | T | T |
| 0.0876310542087790 | 0.0020457147520227 | 0.0837849843559788 | T | T | T |
| 0.1053411045572557 | 0.1341247780007203 | 0.0746864710854365 | T | T | T |
| 0.3032462448514624 | 0.8642563611136620 | 0.1289843438509635 | T | T | T |
| 0.3065186214687092 | 0.9949479108654672 | 0.0898553072193098 | T | T | T |
| 0.3017680111632068 | 0.1281811269867049 | 0.0739235050831323 | T | T | T |

**Structure files (CONTCAR) involved in this work:**

|                    |                    |                    |   |   |   |
|--------------------|--------------------|--------------------|---|---|---|
| 0.5120896028227786 | 0.9575419655199331 | 0.2869552002712117 | T | T | T |
| 0.5154658134257941 | 0.1364766171922403 | 0.2871448147178725 | T | T | T |
| 0.6439780646845560 | 0.5505328766445653 | 0.2930911954754133 | T | T | T |
| 0.6757062056018778 | 0.5661426301515886 | 0.1037363722998154 | T | T | T |
| 0.7890107130174988 | 0.5843135402682168 | 0.0079468504807724 | T | T | T |
| 0.9067658951479757 | 0.5742854435291359 | 0.0932768759391372 | T | T | T |
| 0.8917922800384924 | 0.5592401818554714 | 0.2918969864678914 | T | T | T |
| 0.7686454285665795 | 0.5333708066385247 | 0.2383313463553089 | T | T | T |
| 0.6455364402376013 | 0.3335252094985130 | 0.2859490311137946 | T | T | T |
| 0.7030777431779668 | 0.3218412548496820 | 0.1115595143223620 | T | T | T |
| 0.8057137572269968 | 0.3500322714793443 | 0.9895025628467941 | T | T | T |
| 0.9076593917122370 | 0.3283868460050123 | 0.1106692169485817 | T | T | T |
| 0.9012606454464903 | 0.3526720965309150 | 0.3047208481409558 | T | T | T |
| 0.7726310821039276 | 0.3674121338050362 | 0.2646617204838324 | T | T | T |
| 0.6780978246131404 | 0.4437447813192065 | 0.1837915934119557 | T | T | T |
| 0.9197333108857692 | 0.4539929669966821 | 0.1764809694787046 | T | T | T |
| 0.5655517738936555 | 0.6273787273443430 | 0.4035028725577912 | T | T | T |
| 0.5798494909349359 | 0.4989239803137867 | 0.4494963299942995 | T | T | T |
| 0.5847213211872361 | 0.3651225043024569 | 0.4556602677345782 | T | T | T |
| 0.7930630687084509 | 0.6300615476959616 | 0.3727381163358823 | T | T | T |
| 0.8094327652935875 | 0.5032175362146724 | 0.4234739287279395 | T | T | T |
| 0.8149092218720362 | 0.3714489956040482 | 0.4520459824669149 | T | T | T |
| 0.0102133534095763 | 0.5502501251859482 | 0.2120926605521783 | T | T | T |
| 0.0163961336092251 | 0.3658180847404373 | 0.2129059926192262 | T | T | T |
| 0.8697067580946090 | 0.4324187914590686 | 0.7452451243074233 | T | T | T |
| 0.7870082683682521 | 0.4483845360786384 | 0.6001346579023827 | T | T | T |
| 0.6963498263710221 | 0.4360079063906402 | 0.4573911896423280 | T | T | T |
| 0.6137338137420822 | 0.4360624052180694 | 0.6160668158391254 | T | T | T |
| 0.6090091710324645 | 0.4463537145975309 | 0.8128079980063008 | T | T | T |
| 0.7395158599641956 | 0.4309583283598816 | 0.7804331148821950 | T | T | T |
| 0.8757687744153037 | 0.6678758725342504 | 0.7278735017205915 | T | T | T |
| 0.8048455671219388 | 0.6497616857002321 | 0.5697601114493034 | T | T | T |
| 0.6843935262913193 | 0.6424149809419132 | 0.4883304426679816 | T | T | T |
| 0.5745579819834788 | 0.6649592046552597 | 0.5930345159936901 | T | T | T |
| 0.5962155313811728 | 0.6701643696721402 | 0.7881594186959965 | T | T | T |
| 0.7282004748132982 | 0.6705146695164906 | 0.7547096647053357 | T | T | T |
| 0.7982907998499574 | 0.5479238068987478 | 0.7309481666792300 | T | T | T |
| 0.5820886683722685 | 0.5521402686206289 | 0.6979466057442784 | T | T | T |
| 0.9292366753307281 | 0.3696553890507121 | 0.9214654436906828 | T | T | T |
| 0.8809525752004267 | 0.5040768934353665 | 0.9265012839400142 | T | T | T |
| 0.8929643486275348 | 0.6379218116193985 | 0.9225508545491073 | T | T | T |
| 0.6799440615140037 | 0.3683869102741025 | 0.9295659484959252 | T | T | T |
| 0.6976955181249450 | 0.4999849729541436 | 0.9372944529283526 | T | T | T |
| 0.6755755044335252 | 0.6314828553918828 | 0.9325503281416138 | T | T | T |
| 0.4967449447086769 | 0.4493166050977684 | 0.7139110064026618 | T | T | T |
| 0.4778320880994725 | 0.6349136375780163 | 0.7171534453846745 | T | T | T |
| 0.6425496648217278 | 0.9407898002063848 | 0.2817636844668319 | T | T | T |
| 0.6848585283312448 | 0.9647784788838774 | 0.0954681868908176 | T | T | T |
| 0.7953640323113007 | 0.9226909194251360 | 0.0042304981501606 | T | T | T |
| 0.9111020226772257 | 0.9333320195280855 | 0.0989681926496419 | T | T | T |
| 0.8952538162397197 | 0.9260641924716381 | 0.2972041688192254 | T | T | T |
| 0.7711089303780797 | 0.9527962620914054 | 0.2429550657197360 | T | T | T |
| 0.6378038393403364 | 0.1791394998691881 | 0.2486215666884046 | T | T | T |

**Structure files (CONTCAR) involved in this work:**

|                    |                    |                    |   |   |   |
|--------------------|--------------------|--------------------|---|---|---|
| 0.6906216865536762 | 0.1429591298444904 | 0.0762303650712777 | T | T | T |
| 0.8073673097926348 | 0.1410337859041009 | 0.9837475238154592 | T | T | T |
| 0.9121865993242066 | 0.1577434541811422 | 0.1032183603762016 | T | T | T |
| 0.8952010693884234 | 0.1589868418840238 | 0.2983295898139608 | T | T | T |
| 0.7705085391342511 | 0.1681610027868315 | 0.2279266415093175 | T | T | T |
| 0.6921852890552930 | 0.0598192498461254 | 0.2343962321805369 | T | T | T |
| 0.9177144977029817 | 0.0437392941408641 | 0.2079839884853233 | T | T | T |
| 0.5674862101433018 | 0.8727848773901213 | 0.4129073203325748 | T | T | T |
| 0.5836902257771904 | 0.0033385981054681 | 0.4371822853709171 | T | T | T |
| 0.6097010330107929 | 0.1338515832489277 | 0.4311799643759762 | T | T | T |
| 0.8010271219008135 | 0.8652965997210487 | 0.3883544288995143 | T | T | T |
| 0.8166837092811388 | 0.9986373176895098 | 0.4175488349072881 | T | T | T |
| 0.7917910987262197 | 0.1315909621411488 | 0.4160591159723147 | T | T | T |
| 0.0127088335017278 | 0.9486295530464327 | 0.2252090589431361 | T | T | T |
| 0.0151284340957047 | 0.1337066887175763 | 0.2226704845343815 | T | T | T |
| 0.8612343060745805 | 0.0724922996891396 | 0.7683192733526635 | T | T | T |
| 0.8184326160615676 | 0.0695020743184704 | 0.5836340540819149 | T | T | T |
| 0.7030948046771273 | 0.0460100782937429 | 0.4885203962321427 | T | T | T |
| 0.5973484448984367 | 0.0733037392826582 | 0.6041700773814698 | T | T | T |
| 0.6097120188712358 | 0.0461361134676874 | 0.8003651532442352 | T | T | T |
| 0.7318043335029879 | 0.0569922072562315 | 0.7294301071013677 | T | T | T |
| 0.8659668517848981 | 0.8316468071788661 | 0.7500159664527966 | T | T | T |
| 0.8005185086898889 | 0.8374785245157714 | 0.5837052144299493 | T | T | T |
| 0.6868295458866626 | 0.8533347774201847 | 0.4877290431818614 | T | T | T |
| 0.5821876084068954 | 0.8265004564317004 | 0.6018562283219830 | T | T | T |
| 0.5922687442223920 | 0.8480084310308945 | 0.7997079276978682 | T | T | T |
| 0.7215138167485752 | 0.8570713476825111 | 0.7654155634145509 | T | T | T |
| 0.8165515235747418 | 0.9571244930489889 | 0.6934164898828380 | T | T | T |
| 0.5803943375667098 | 0.9501716856165032 | 0.6694124836424239 | T | T | T |
| 0.9309628984984371 | 0.1229893866280948 | 0.9162446951020629 | T | T | T |
| 0.8941940721756905 | 0.9950649625993100 | 0.9247393222404758 | T | T | T |
| 0.9038309593007410 | 0.8616159100558687 | 0.9373317166811903 | T | T | T |
| 0.6926235462129900 | 0.1330938386252458 | 0.8802825154011575 | T | T | T |
| 0.7137054042119723 | 0.0044053195604087 | 0.9107173423515874 | T | T | T |
| 0.6740549402754390 | 0.8792630228558388 | 0.9492755285593877 | T | T | T |
| 0.4918204835477816 | 0.0457113975628545 | 0.7199786419334185 | T | T | T |
| 0.4790101373996821 | 0.8686748438413467 | 0.7077522472711357 | T | T | T |
| 0.3650178304777776 | 0.4378885987473545 | 0.7227594519333219 | T | T | T |
| 0.3028845810507015 | 0.4342295713264129 | 0.8958435761898028 | T | T | T |
| 0.2045266366724178 | 0.4432167328003667 | 0.0338238980137860 | T | T | T |
| 0.1100690659661030 | 0.4361446919779894 | 0.8963685193305179 | T | T | T |
| 0.1050470650038699 | 0.4416211268623825 | 0.6995918088184279 | T | T | T |
| 0.2338319078479395 | 0.4594695159229270 | 0.7345526210958695 | T | T | T |
| 0.3519263184936227 | 0.6725164353417179 | 0.7354462859011752 | T | T | T |
| 0.3104748711301912 | 0.6550903705848312 | 0.9193640540810302 | T | T | T |
| 0.1957513697306368 | 0.6450704683493196 | 0.0180316422918740 | T | T | T |
| 0.0978740149177621 | 0.6736990069319158 | 0.8915075916077463 | T | T | T |
| 0.1036761133962264 | 0.6641588557058961 | 0.6919357028145434 | T | T | T |
| 0.2252688521319970 | 0.6464806496476758 | 0.7683749289835570 | T | T | T |
| 0.3183475269491320 | 0.5509381747881199 | 0.7978049731843109 | T | T | T |
| 0.1001339996380765 | 0.5534641615170379 | 0.8050856155954985 | T | T | T |
| 0.4329322458344695 | 0.3735145238591502 | 0.5838232591510737 | T | T | T |
| 0.4242055274345509 | 0.5061661126524287 | 0.5728486804822084 | T | T | T |

**Structure files (CONTCAR) involved in this work:**

|                    |                    |                    |   |   |   |
|--------------------|--------------------|--------------------|---|---|---|
| 0.3962018522271397 | 0.6364484687802612 | 0.5577481800532450 | T | T | T |
| 0.1922441933901723 | 0.3635853384017758 | 0.6101979519046425 | T | T | T |
| 0.1830183578494212 | 0.4924287979725703 | 0.5583574373708814 | T | T | T |
| 0.2057210733796279 | 0.6243503999371381 | 0.5743782904020269 | T | T | T |
| 0.9960041020836955 | 0.4693746144247170 | 0.8027221147520431 | T | T | T |
| 0.9925872947003331 | 0.6311039371069904 | 0.7901860898298245 | T | T | T |
| 0.1409236468716928 | 0.5668969726424775 | 0.2213608819291106 | T | T | T |
| 0.2001355835045826 | 0.5653271816654607 | 0.3976026539669029 | T | T | T |
| 0.3032051462928117 | 0.5426644573894840 | 0.5206046760820996 | T | T | T |
| 0.4047783165605490 | 0.5653284552681705 | 0.3959980768901267 | T | T | T |
| 0.3988466240587416 | 0.5540543899477118 | 0.1989095417630190 | T | T | T |
| 0.2708915151445213 | 0.5367978379326943 | 0.2384807466803786 | T | T | T |
| 0.1421323881022461 | 0.3297509223833945 | 0.2394111163332025 | T | T | T |
| 0.1963139775476453 | 0.3456464248880110 | 0.4149637259329141 | T | T | T |
| 0.3094800486697194 | 0.3527745281520007 | 0.5183452996200957 | T | T | T |
| 0.4129942610077865 | 0.3264120410517030 | 0.4004320616598939 | T | T | T |
| 0.3978187864801473 | 0.3359711162160668 | 0.2046845308656087 | T | T | T |
| 0.2716297928739891 | 0.3585244157771972 | 0.2532584009751011 | T | T | T |
| 0.1788621866422073 | 0.4506841618037230 | 0.2979088289078442 | T | T | T |
| 0.4149301831879177 | 0.4458123039383597 | 0.3144928569767592 | T | T | T |
| 0.0714255981199171 | 0.6232626223280266 | 0.0739851412695547 | T | T | T |
| 0.0856129911478589 | 0.4916841921938224 | 0.0749662846701153 | T | T | T |
| 0.1004309161148887 | 0.3603139735251604 | 0.0567072891171406 | T | T | T |
| 0.3109095654325182 | 0.6326645281201767 | 0.1137081645171832 | T | T | T |
| 0.3198317595237020 | 0.5036453561356539 | 0.0600632164588757 | T | T | T |
| 0.3114189393074324 | 0.3681368584064127 | 0.0632702627499930 | T | T | T |
| 0.5129302982999360 | 0.5347919840230948 | 0.2864164744366413 | T | T | T |
| 0.5158098979064357 | 0.3601880384270590 | 0.2848414386672803 | T | T | T |
| 0.4351867455676895 | 0.7508189072106475 | 0.6368613478330545 | T | T | T |
| 0.1986765953874599 | 0.7486568548716231 | 0.6412314531300912 | T | T | T |
| 0.2751032733060331 | 0.7506864001465782 | 0.0450656295868610 | T | T | T |
| 0.1124162496972064 | 0.7480198605874134 | 0.0524304403587433 | T | T | T |
| 0.0602169562607389 | 0.2483823336286989 | 0.1443168018387669 | T | T | T |
| 0.3048070227752769 | 0.2489657928336700 | 0.1483739240175274 | T | T | T |
| 0.2279561258334349 | 0.2472911855141106 | 0.5374616792705772 | T | T | T |
| 0.3901808778992946 | 0.2493958025101202 | 0.5571076134383918 | T | T | T |
| 0.5608341832739925 | 0.2486545180187938 | 0.3713189783241964 | T | T | T |
| 0.8154393430365098 | 0.2560247160031321 | 0.3609922505321364 | T | T | T |
| 0.7258083567928293 | 0.2460272211045700 | 0.9565441352376775 | T | T | T |
| 0.8883483461143131 | 0.2460971275141061 | 0.9599126427505693 | T | T | T |
| 0.9443497022744890 | 0.7487781345786471 | 0.8545901559618374 | T | T | T |
| 0.6731913480673818 | 0.7575009379840870 | 0.8812874952963533 | T | T | T |
| 0.7620066085324896 | 0.7467116379601068 | 0.4449377786425256 | T | T | T |
| 0.6065124494631881 | 0.7488879384458118 | 0.4472333852735066 | T | T | T |
| 0.9201997337058052 | 0.3754419525524996 | 0.5985243963688410 | T | T | T |
| 0.0108879030254821 | 0.8182846993362360 | 0.5164491976666882 | T | T | T |
| 0.9643802795524493 | 0.6996860060384723 | 0.4395564433320063 | T | T | T |
| 0.9650688894207227 | 0.4198578378800584 | 0.5442348694410540 | T | T | T |
| 0.1068274377301549 | 0.6956300439245202 | 0.4262888964950091 | T | T | T |
| 0.9410213808147044 | 0.7927193343614842 | 0.4192712491378475 | T | T | T |
| 0.0315990210686810 | 0.7286732079416331 | 0.5496708721321788 | T | T | T |
| 0.9074556645257966 | 0.8070739703743314 | 0.5814500273357948 | T | T | T |
| 0.9143490837314223 | 0.7017183560976975 | 0.5805795739970073 | T | T | T |



**Structure files (CONTCAR) involved in this work:**

|                    |                    |                    |   |   |   |
|--------------------|--------------------|--------------------|---|---|---|
| 0.8831123646370117 | 0.3635350335398803 | 0.5533086526742227 | T | T | T |
| 0.9424325057760886 | 0.4699262199665819 | 0.5345905131227563 | T | T | T |
| 0.9761451578246099 | 0.3980089010677181 | 0.4707489160193259 | T | T | T |
| 0.0107602277198875 | 0.4238596029983304 | 0.5887336561492932 | T | T | T |
| 0.8927551610262556 | 0.4064139204926596 | 0.6822911340357327 | T | T | T |
| 0.1067229519948205 | 0.7334829131234889 | 0.3664417328626160 | T | T | T |
| 0.1100427185196942 | 0.6455178423447376 | 0.3923670838722663 | T | T | T |
| 0.1521358868578093 | 0.7032003686314583 | 0.4709831987308957 | T | T | T |
| 0.0297034052874995 | 0.6873832036537436 | 0.4265144143130500 | T | T | T |

**Figure S10 Mo-FS**

Si Al O C Mo H

1.0000000000000000

20.0219999999999985 0.0000000000000000 0.0000000000000000

0.0000000000000000 19.8990000000000009 0.0000000000000000

0.0000000000000000 0.0000000000000000 13.3829999999999991

93 3 193 4 4 9

Selective dynamics

Direct

|                    |                    |                    |   |   |   |
|--------------------|--------------------|--------------------|---|---|---|
| 0.4245751308555158 | 0.0579859873876220 | 0.6549682177981823 | T | T | T |
| 0.3068757556041276 | 0.0289884147303938 | 0.7994399374509317 | T | T | T |
| 0.2812210378179626 | 0.0570839125245635 | 0.0225790151895217 | T | T | T |
| 0.1213263770688871 | 0.0631541025551981 | 0.0203865521480242 | T | T | T |
| 0.0666484382533847 | 0.0284936352274413 | 0.8078627759666923 | T | T | T |
| 0.1803316803802856 | 0.0629918559756957 | 0.6738544869430517 | T | T | T |
| 0.4151450023749582 | 0.8272481028591914 | 0.6688496997085874 | T | T | T |
| 0.3049009618296071 | 0.8699591533565449 | 0.8128115283761190 | T | T | T |
| 0.2696061505977268 | 0.8313977811193610 | 0.0310566090003006 | T | T | T |
| 0.1156364743930478 | 0.8260893279951523 | 0.0166931909202638 | T | T | T |
| 0.0697099798309914 | 0.8713598018614821 | 0.8013983037607521 | T | T | T |
| 0.1869422065855460 | 0.8270784600207474 | 0.6748828279970218 | T | T | T |
| 0.0791260577519651 | 0.9379393245991280 | 0.1568883960977743 | T | T | T |
| 0.1939183956715614 | 0.9683247607093876 | 0.3018730426775888 | T | T | T |
| 0.2178062917051179 | 0.9440793886841505 | 0.5245012123902895 | T | T | T |
| 0.3755442883283631 | 0.9369367185835927 | 0.5175687501129194 | T | T | T |
| 0.4333793307958262 | 0.9697906847664016 | 0.3077004023510839 | T | T | T |
| 0.3181309421717146 | 0.9379116119589079 | 0.1746375987767178 | T | T | T |
| 0.0796563990339498 | 0.1719322120696074 | 0.1749001641028790 | T | T | T |
| 0.1961878594267606 | 0.1268520427397392 | 0.3093355779736588 | T | T | T |
| 0.2331989681127323 | 0.1668871066694802 | 0.5271892534095595 | T | T | T |
| 0.3873717168792635 | 0.1724637341924899 | 0.5177975615795136 | T | T | T |
| 0.4355021289507728 | 0.1280469752987332 | 0.3048707287492454 | T | T | T |
| 0.3180151284227040 | 0.1704841331524661 | 0.1740893619515698 | T | T | T |
| 0.5759168303844655 | 0.5525825432991548 | 0.3575477321132813 | T | T | T |
| 0.6912305853117998 | 0.5232480184334306 | 0.2043771388416659 | T | T | T |
| 0.7096198857155657 | 0.5710125741401743 | 0.9935645541527961 | T | T | T |
| 0.8674005124311089 | 0.5726976325418496 | 0.9852087309723537 | T | T | T |
| 0.9309441797344878 | 0.5343008534405791 | 0.1912720701138017 | T | T | T |
| 0.8151437122738815 | 0.5561446715062618 | 0.3317129560147450 | T | T | T |
| 0.5765828238092078 | 0.3267497335823875 | 0.3483511369415160 | T | T | T |
| 0.6990361088594664 | 0.3671522690953165 | 0.2113519233440943 | T | T | T |
| 0.7292227337911876 | 0.3225780156578995 | 0.9962699309109987 | T | T | T |
| 0.8836473725646995 | 0.3252640111773064 | 0.9931486765272833 | T | T | T |
| 0.9358079174422983 | 0.3755954014965739 | 0.1990424050648222 | T | T | T |

**Structure files (CONTCAR) involved in this work:**

|                    |                    |                    |   |   |   |
|--------------------|--------------------|--------------------|---|---|---|
| 0.8256240034169862 | 0.3352146539854821 | 0.3423370703695614 | T | T | T |
| 0.7963293118344286 | 0.4686966265322930 | 0.7163063430695013 | T | T | T |
| 0.7749931814387416 | 0.4405743695418957 | 0.4826280712591261 | T | T | T |
| 0.6183480895337997 | 0.4339592271978078 | 0.4953519206621013 | T | T | T |
| 0.5742973488349770 | 0.4713784020233605 | 0.7095745665970881 | T | T | T |
| 0.6810477762898804 | 0.4375436129958792 | 0.8652523160084222 | T | T | T |
| 0.9259849887811328 | 0.6721609765265141 | 0.8247911162232507 | T | T | T |
| 0.7614309190875495 | 0.6663380163841022 | 0.4705151379432896 | T | T | T |
| 0.6079670780484917 | 0.6711788786673940 | 0.4840330803795605 | T | T | T |
| 0.5583425657771097 | 0.6301859571947431 | 0.6999272615915847 | T | T | T |
| 0.6704783024387925 | 0.6813983203162265 | 0.8371009317152005 | T | T | T |
| 0.5777902149094983 | 0.9437095043079868 | 0.3544868466410216 | T | T | T |
| 0.6963327650244868 | 0.9794904507969652 | 0.2117682459961893 | T | T | T |
| 0.7174856673927208 | 0.9427873310951045 | 0.9886162101796291 | T | T | T |
| 0.8759301140969672 | 0.9295120354905823 | 0.9897416907923580 | T | T | T |
| 0.9344508660808776 | 0.9639694157082421 | 0.2041539309630462 | T | T | T |
| 0.8185215016329521 | 0.9374965192896272 | 0.3369354183314157 | T | T | T |
| 0.5806957743589402 | 0.1735819844816725 | 0.3340368374467965 | T | T | T |
| 0.6973506463107015 | 0.1372738454817476 | 0.1954692072500701 | T | T | T |
| 0.7298735586736856 | 0.1663397922827262 | 0.9746993730774300 | T | T | T |
| 0.8843170614753679 | 0.1682949769330765 | 0.9896370303516846 | T | T | T |
| 0.9352088846435328 | 0.1233870408571235 | 0.2054261898363764 | T | T | T |
| 0.8182813124952185 | 0.1776341744899487 | 0.3249494599511265 | T | T | T |
| 0.9181903963921604 | 0.0556958731023708 | 0.8501849804166443 | T | T | T |
| 0.8073054195019301 | 0.0362235221208582 | 0.6941780773596601 | T | T | T |
| 0.7823452112148962 | 0.0613222201143923 | 0.4762568339369119 | T | T | T |
| 0.6241655302119544 | 0.0643765723994411 | 0.4899718028238790 | T | T | T |
| 0.5700201039765680 | 0.0291682190069194 | 0.6974979018501501 | T | T | T |
| 0.6872261819750809 | 0.0594648606833148 | 0.8298809299666940 | T | T | T |
| 0.9250633755214905 | 0.8267726604195463 | 0.8308307521122085 | T | T | T |
| 0.7624125548731978 | 0.8247591638203525 | 0.4759296285213613 | T | T | T |
| 0.6100890301927515 | 0.8253686268312053 | 0.4882795591175181 | T | T | T |
| 0.5599211759838137 | 0.8735601162822347 | 0.6957874865333256 | T | T | T |
| 0.6675815107124888 | 0.8348982935904916 | 0.8458031985202886 | T | T | T |
| 0.4284882458630148 | 0.4426458866148236 | 0.6483739474879804 | T | T | T |
| 0.3052774340615023 | 0.4705242493104109 | 0.7880891364454530 | T | T | T |
| 0.2838822939437468 | 0.4378313909344166 | 0.0135347302391998 | T | T | T |
| 0.1243676315198989 | 0.4331798541435817 | 0.0139079798888506 | T | T | T |
| 0.0743654464455783 | 0.4748156033341529 | 0.8014161928127193 | T | T | T |
| 0.1792926262196011 | 0.4388238871122465 | 0.6516259055099159 | T | T | T |
| 0.4161415737642462 | 0.6736079796743963 | 0.6619396993520986 | T | T | T |
| 0.3012110412237282 | 0.6300990628252835 | 0.8046255178200715 | T | T | T |
| 0.2729207692257214 | 0.6713589855617826 | 0.0231324033462388 | T | T | T |
| 0.1192729495392869 | 0.6724469016976545 | 0.0090055225523305 | T | T | T |
| 0.0728664537736885 | 0.6299548403391914 | 0.7968096755728472 | T | T | T |
| 0.1851219970364227 | 0.6708687971606161 | 0.6686294753692605 | T | T | T |
| 0.0773853576901831 | 0.5576723810549100 | 0.1455585465851006 | T | T | T |
| 0.1972582017217732 | 0.5305788242808135 | 0.2882555751746214 | T | T | T |
| 0.2231149254431992 | 0.5563903556905931 | 0.5128094347883817 | T | T | T |
| 0.3818936052672827 | 0.5631241282455890 | 0.5112225482670931 | T | T | T |
| 0.4332921530851988 | 0.5251710922784938 | 0.2991400352919397 | T | T | T |
| 0.3241279249118001 | 0.5576475919498771 | 0.1528842645715425 | T | T | T |
| 0.0794045376470705 | 0.3265797072123106 | 0.1631265275309124 | T | T | T |

**Structure files (CONTCAR) involved in this work:**

|                    |                    |                    |   |   |   |
|--------------------|--------------------|--------------------|---|---|---|
| 0.1977810689744876 | 0.3717834734319672 | 0.3006491056139700 | T | T | T |
| 0.2319811309427147 | 0.3275597107850035 | 0.5194548845944461 | T | T | T |
| 0.3864815011083285 | 0.3260411930316211 | 0.5141985769548392 | T | T | T |
| 0.4355349327877309 | 0.3678200005067789 | 0.3006688223541556 | T | T | T |
| 0.3206566217763791 | 0.3276739224225609 | 0.1675160584768249 | T | T | T |
| 0.9218449600642515 | 0.4447229289481717 | 0.8565846271869423 | T | T | T |
| 0.7957236325602692 | 0.6318137498774592 | 0.6997487666892657 | T | T | T |
| 0.7950219053691903 | 0.8737489458482092 | 0.7044868086472160 | T | T | T |
| 0.3611870762523622 | 0.0670667252126980 | 0.7296829237407605 | T | T | T |
| 0.3173421139771802 | 0.0522282039618390 | 0.9143812974863936 | T | T | T |
| 0.2009515128517730 | 0.0517487965361364 | 0.0101016152547563 | T | T | T |
| 0.0875640906651241 | 0.0653682224610101 | 0.9110851401369937 | T | T | T |
| 0.1041978877614961 | 0.0655507511761425 | 0.7153770888707920 | T | T | T |
| 0.2312185813225071 | 0.0484078471360591 | 0.7662565060649916 | T | T | T |
| 0.3612066510746683 | 0.8241482024601495 | 0.7594544006162427 | T | T | T |
| 0.3084285011403362 | 0.8580575861107640 | 0.9322125689152337 | T | T | T |
| 0.1917199455593287 | 0.8544737478496074 | 0.0235277951818016 | T | T | T |
| 0.0895689926985177 | 0.8316074326445569 | 0.9027774425469313 | T | T | T |
| 0.1088197275400889 | 0.8361184518141164 | 0.7075015557505427 | T | T | T |
| 0.2314832998055042 | 0.8472337474408949 | 0.7719735111466179 | T | T | T |
| 0.3179940808135164 | 0.9484016335272161 | 0.7861023976762662 | T | T | T |
| 0.0906845761873711 | 0.9500059438989229 | 0.8105636417757165 | T | T | T |
| 0.4337574324663700 | 0.1263963356067836 | 0.5896908200792690 | T | T | T |
| 0.4143831113549936 | 0.9947688852891953 | 0.5798264348567310 | T | T | T |
| 0.3824709280281551 | 0.8643490394152142 | 0.5721254398026612 | T | T | T |
| 0.1974216326272761 | 0.1354481582298263 | 0.6249895178208420 | T | T | T |
| 0.1860617363151627 | 0.0037253073601192 | 0.5912452272918839 | T | T | T |
| 0.2050431373640481 | 0.8719005628288992 | 0.5778218208655682 | T | T | T |
| 0.9866075781386029 | 0.0342382724198775 | 0.7927666704390445 | T | T | T |
| 0.9900013605145787 | 0.8653494148948611 | 0.7838318023402353 | T | T | T |
| 0.1427914414045159 | 0.9274244846782036 | 0.2300361730174794 | T | T | T |
| 0.1812839082685713 | 0.9448033188907108 | 0.4161992193344392 | T | T | T |
| 0.2971518462532539 | 0.9572409682044154 | 0.5099441983244648 | T | T | T |
| 0.4086604858339891 | 0.9305337134181345 | 0.4075395478396441 | T | T | T |
| 0.3951259814502170 | 0.9402099271353892 | 0.2105669847415725 | T | T | T |
| 0.2704889993047223 | 0.9509906955294845 | 0.2713368085506852 | T | T | T |
| 0.1383723249920125 | 0.1725728657559695 | 0.2586955976939300 | T | T | T |
| 0.1949943109574000 | 0.1388572691130508 | 0.4287538918654425 | T | T | T |
| 0.3111144111817667 | 0.1438720038081487 | 0.5225190401223065 | T | T | T |
| 0.4139179331844683 | 0.1699175094581976 | 0.4036212464724796 | T | T | T |
| 0.3950281456162697 | 0.1577785805850879 | 0.2088266005020518 | T | T | T |
| 0.2692111204796431 | 0.1476543023216501 | 0.2657602766859875 | T | T | T |
| 0.1802704378478130 | 0.0482720533629722 | 0.2855782555206365 | T | T | T |
| 0.4169877406524719 | 0.0493910473852505 | 0.3210427991340795 | T | T | T |
| 0.0685512694445126 | 0.8702248778133431 | 0.0906898498666009 | T | T | T |
| 0.0881198832704117 | 0.0020132194214854 | 0.0835633807982772 | T | T | T |
| 0.1059801759521530 | 0.1341315015272708 | 0.0749097900380089 | T | T | T |
| 0.3035318002495151 | 0.8639424296324770 | 0.1292627724134843 | T | T | T |
| 0.3060278781345812 | 0.9947788903404656 | 0.0903989908832157 | T | T | T |
| 0.3017839383594069 | 0.1279859649777209 | 0.0736224742574832 | T | T | T |
| 0.5121595630183986 | 0.9574336006723193 | 0.2867207761553346 | T | T | T |
| 0.5154481318204438 | 0.1361933934680570 | 0.2868286012497693 | T | T | T |
| 0.6443076981631690 | 0.5506501433328760 | 0.2938450641104335 | T | T | T |

**Structure files (CONTCAR) involved in this work:**

|                    |                    |                    |   |   |   |
|--------------------|--------------------|--------------------|---|---|---|
| 0.6757947240468878 | 0.5661865831734947 | 0.1044350374912140 | T | T | T |
| 0.7886068080757817 | 0.5843781366112762 | 0.0073680780091121 | T | T | T |
| 0.9060087653779365 | 0.5746398206928371 | 0.0932423190261412 | T | T | T |
| 0.8918685420659741 | 0.5592446252130814 | 0.2920461282166318 | T | T | T |
| 0.7687785945078902 | 0.5327864424313346 | 0.2385009534753459 | T | T | T |
| 0.6453756600725963 | 0.3332359640669929 | 0.2859533628511222 | T | T | T |
| 0.7027753306334696 | 0.3220054004356915 | 0.1113014647923224 | T | T | T |
| 0.8053830894078562 | 0.3504278869329988 | 0.9890975561067760 | T | T | T |
| 0.9069952081796473 | 0.3282914083001758 | 0.1107186991371348 | T | T | T |
| 0.9009090775881226 | 0.3529002580272642 | 0.3047267376059771 | T | T | T |
| 0.7723486216997512 | 0.3672552615067732 | 0.2645248952834440 | T | T | T |
| 0.6776393484399387 | 0.4436925855798053 | 0.1842666804429781 | T | T | T |
| 0.9194432068941988 | 0.4539649687397169 | 0.1760180073437133 | T | T | T |
| 0.5654567277327671 | 0.6272056051998632 | 0.4039073000202779 | T | T | T |
| 0.5793441771258576 | 0.4985536708735741 | 0.4491613236241586 | T | T | T |
| 0.5844068460477576 | 0.3647967452823710 | 0.4555234770940201 | T | T | T |
| 0.7933594337219758 | 0.6296617399441684 | 0.3728361644515148 | T | T | T |
| 0.8095164513540766 | 0.5025328366355071 | 0.4235414542822540 | T | T | T |
| 0.8142643258232924 | 0.3707680241150806 | 0.4520814872546136 | T | T | T |
| 0.0096708975814778 | 0.5507709317827955 | 0.2116226466190740 | T | T | T |
| 0.0160196249652701 | 0.3656660500791563 | 0.2125348485271226 | T | T | T |
| 0.8690806948757858 | 0.4316956762052731 | 0.7457468819750400 | T | T | T |
| 0.7866426272781002 | 0.4479267335437321 | 0.6002787754089893 | T | T | T |
| 0.6959558961152740 | 0.4359461251168631 | 0.4575151024654077 | T | T | T |
| 0.6130849659771761 | 0.4357888436562163 | 0.6159756812706805 | T | T | T |
| 0.6083872424758608 | 0.4464308810135761 | 0.8127530609005407 | T | T | T |
| 0.7388918678252966 | 0.4314988511397407 | 0.7804715248073114 | T | T | T |
| 0.8764696601112936 | 0.6681245703351129 | 0.7266539151728747 | T | T | T |
| 0.8048217600772719 | 0.6484717500199313 | 0.5696557820246915 | T | T | T |
| 0.6844180795419166 | 0.6423030830700780 | 0.4881336293826914 | T | T | T |
| 0.5746953421688454 | 0.6651477192121878 | 0.5932255624501305 | T | T | T |
| 0.5962825665375374 | 0.6699382183623448 | 0.7881211517325567 | T | T | T |
| 0.7286019597376038 | 0.6699166058103492 | 0.7557610761348830 | T | T | T |
| 0.7991403009888449 | 0.5477499244995173 | 0.7307358200729017 | T | T | T |
| 0.5819048995548961 | 0.5521208947579818 | 0.6975218650935634 | T | T | T |
| 0.9292519096735063 | 0.3703475512876090 | 0.9221284207358452 | T | T | T |
| 0.8810480163292714 | 0.5045737889334846 | 0.9261893989953590 | T | T | T |
| 0.8923347369151384 | 0.6384843197480156 | 0.9219649098809437 | T | T | T |
| 0.6795229993986125 | 0.3685117854915571 | 0.9293928732036262 | T | T | T |
| 0.6968747116106226 | 0.5000753208890661 | 0.9376390426059720 | T | T | T |
| 0.6748888096252115 | 0.6315750308941657 | 0.9333508151807483 | T | T | T |
| 0.4961615949183354 | 0.4497066161261524 | 0.7137706259364667 | T | T | T |
| 0.4776837150358351 | 0.6350322684664473 | 0.7171280746768232 | T | T | T |
| 0.6426768275009285 | 0.9402967832328273 | 0.2815719616144496 | T | T | T |
| 0.6842434848619023 | 0.9643130251636334 | 0.0948346027849216 | T | T | T |
| 0.7959030614852568 | 0.9242656076830648 | 0.0050053771227631 | T | T | T |
| 0.9121218847269057 | 0.9321099850483334 | 0.0983379061952656 | T | T | T |
| 0.8952498080959889 | 0.9261129211318331 | 0.2965885782340536 | T | T | T |
| 0.7711456191941808 | 0.9537640380224965 | 0.2417694505857080 | T | T | T |
| 0.6375109659506762 | 0.1794197768235292 | 0.2477724764031006 | T | T | T |
| 0.6904854519344694 | 0.1429179440491321 | 0.0754848842268243 | T | T | T |
| 0.8073499348740194 | 0.1413222477009109 | 0.9832505033481793 | T | T | T |
| 0.9122528387242799 | 0.1581958877705587 | 0.1023123727527919 | T | T | T |

**Structure files (CONTCAR) involved in this work:**

|                    |                    |                    |   |   |   |
|--------------------|--------------------|--------------------|---|---|---|
| 0.8950185527705743 | 0.1583557352171812 | 0.2973582517224505 | T | T | T |
| 0.7701471998582824 | 0.1673850094526207 | 0.2277240876697498 | T | T | T |
| 0.6908205436684555 | 0.0597053945611020 | 0.2334656560719954 | T | T | T |
| 0.9173940549936676 | 0.0435286699746240 | 0.2055531631203478 | T | T | T |
| 0.5675124240018609 | 0.8727737386564405 | 0.4129695933560736 | T | T | T |
| 0.5838401065945391 | 0.0034021306244475 | 0.4366372394715866 | T | T | T |
| 0.6100188022493670 | 0.1339047443194591 | 0.4304186772627931 | T | T | T |
| 0.8001828449146912 | 0.8650290010105759 | 0.3857810182789986 | T | T | T |
| 0.8165027645158531 | 0.9980461508092999 | 0.4173829771604916 | T | T | T |
| 0.7921235360450634 | 0.1311880994660319 | 0.4159139004252728 | T | T | T |
| 0.0128950358325228 | 0.9491557684297827 | 0.2253054063327903 | T | T | T |
| 0.0149834567259604 | 0.1333989639890103 | 0.2217351111279049 | T | T | T |
| 0.8611140216648144 | 0.0719528961816783 | 0.7683934396553154 | T | T | T |
| 0.8186148656748041 | 0.0688805184224968 | 0.5834314642606834 | T | T | T |
| 0.7031467773803048 | 0.0459771378023735 | 0.4883804852850083 | T | T | T |
| 0.5972924082932423 | 0.0735747625937384 | 0.6035784919210759 | T | T | T |
| 0.6097233090951086 | 0.0464385679007491 | 0.7999335921195657 | T | T | T |
| 0.7317939740322440 | 0.0566923718210798 | 0.7289494938929684 | T | T | T |
| 0.8668931137115855 | 0.8309380176219060 | 0.7472920603238264 | T | T | T |
| 0.8014999631062989 | 0.8383599041713649 | 0.5812094733571559 | T | T | T |
| 0.6869567208469003 | 0.8530142083961492 | 0.4874612017760497 | T | T | T |
| 0.5823745679760410 | 0.8266488073612025 | 0.6018762210755177 | T | T | T |
| 0.5930240938529073 | 0.8485888128706979 | 0.7994644153370143 | T | T | T |
| 0.7222459581623039 | 0.8552596816168105 | 0.7636042179531700 | T | T | T |
| 0.8164987375417803 | 0.9566711656977466 | 0.6935939062858830 | T | T | T |
| 0.5805500369095659 | 0.9504509324192066 | 0.6689094902675370 | T | T | T |
| 0.9309061923291860 | 0.1237276436929660 | 0.9150862756117255 | T | T | T |
| 0.8955190558044690 | 0.9955442696769782 | 0.9254259582541761 | T | T | T |
| 0.9027641373046728 | 0.8617847634442328 | 0.9352763156698995 | T | T | T |
| 0.6928174547771807 | 0.1334398229521470 | 0.8793824583459258 | T | T | T |
| 0.7136073105861197 | 0.0048251724351718 | 0.9106157300042728 | T | T | T |
| 0.6757692129315293 | 0.8790714961825394 | 0.9479575023806482 | T | T | T |
| 0.4919207541456020 | 0.0459896413381336 | 0.7196484977607461 | T | T | T |
| 0.4793761451767928 | 0.8688961256371526 | 0.7082243093797160 | T | T | T |
| 0.3644697497381075 | 0.4374173839518098 | 0.7221342285046956 | T | T | T |
| 0.3043478296193491 | 0.4349186573004344 | 0.8967160020847486 | T | T | T |
| 0.2039281345859332 | 0.4440529702223831 | 0.0313644618447273 | T | T | T |
| 0.1082613295675901 | 0.4361388736663861 | 0.8960938121720016 | T | T | T |
| 0.1048523250413989 | 0.4415115682843429 | 0.6990594318949492 | T | T | T |
| 0.2332885027128008 | 0.4585346549732551 | 0.7366705240701262 | T | T | T |
| 0.3514669357476210 | 0.6725535637630752 | 0.7347931470737539 | T | T | T |
| 0.3102079898141302 | 0.6543592210496739 | 0.9187883408997637 | T | T | T |
| 0.1957692138988229 | 0.6453256795260696 | 0.0187068907558485 | T | T | T |
| 0.0980801339384629 | 0.6737286246090899 | 0.8917672966203984 | T | T | T |
| 0.1033533899727242 | 0.6656900210104743 | 0.6925558375426515 | T | T | T |
| 0.2246584983115300 | 0.6463769479020497 | 0.7684069809447033 | T | T | T |
| 0.3181287667071334 | 0.5508713657917695 | 0.7961296010744517 | T | T | T |
| 0.0999632246855741 | 0.5535984907776448 | 0.8037928196669305 | T | T | T |
| 0.4329329123696070 | 0.3739910300105169 | 0.5829819730037620 | T | T | T |
| 0.4234517103584367 | 0.5066696284762692 | 0.5730208981312638 | T | T | T |
| 0.3965356270955220 | 0.6370884257083853 | 0.5572306691709770 | T | T | T |
| 0.1926352606617409 | 0.3631455025713147 | 0.6111570183218195 | T | T | T |
| 0.1842131404621256 | 0.4920080644642690 | 0.5592299454884332 | T | T | T |

**Structure files (CONTCAR) involved in this work:**

|                    |                    |                    |   |   |   |
|--------------------|--------------------|--------------------|---|---|---|
| 0.2054632129356286 | 0.6241042536532853 | 0.5752805484723862 | T | T | T |
| 0.9953141529156819 | 0.4698308517075382 | 0.8008056070528888 | T | T | T |
| 0.9926440887167706 | 0.6309671825886928 | 0.7910545191925432 | T | T | T |
| 0.1405410962090538 | 0.5671815186713941 | 0.2207265827201808 | T | T | T |
| 0.1984048977362114 | 0.5650446612042672 | 0.3982394119384232 | T | T | T |
| 0.3030829990273521 | 0.5439800368910934 | 0.5185966709436969 | T | T | T |
| 0.4056334825853654 | 0.5657141398160058 | 0.3958537173646192 | T | T | T |
| 0.3988592324828656 | 0.5546661689451670 | 0.1988511079510228 | T | T | T |
| 0.2708477343469800 | 0.5393030474776954 | 0.2400127171417040 | T | T | T |
| 0.1417645323205468 | 0.3299004185990420 | 0.2401481523142429 | T | T | T |
| 0.1956607079559406 | 0.3476952074937588 | 0.4157536590523510 | T | T | T |
| 0.3094557673533153 | 0.3528241678464120 | 0.5178530884420752 | T | T | T |
| 0.4128957131707111 | 0.3267281590864825 | 0.3997622653760257 | T | T | T |
| 0.3977035062090511 | 0.3364269829053428 | 0.2040000149031465 | T | T | T |
| 0.2715609124520985 | 0.3573493659865109 | 0.2543442893707846 | T | T | T |
| 0.1796237610416371 | 0.4511359909963883 | 0.2952417523869107 | T | T | T |
| 0.4150144284483080 | 0.4462000835107000 | 0.3138569309361239 | T | T | T |
| 0.0710668401694322 | 0.6235663215455775 | 0.0737413102956380 | T | T | T |
| 0.0849291578740983 | 0.4918118785873912 | 0.0747195725121553 | T | T | T |
| 0.1006648147577327 | 0.3604986281485930 | 0.0570491465126124 | T | T | T |
| 0.3114299670245177 | 0.6336016842782803 | 0.1132936009010188 | T | T | T |
| 0.3187978586121606 | 0.5040586170452519 | 0.0616903042713539 | T | T | T |
| 0.3100932636054747 | 0.3685389525253495 | 0.0639857531294562 | T | T | T |
| 0.5132336678634143 | 0.5349659077679528 | 0.2856405527610006 | T | T | T |
| 0.5157529119102293 | 0.3603243899164296 | 0.2843281434715420 | T | T | T |
| 0.4353091883249344 | 0.7511165306173986 | 0.6376401614225402 | T | T | T |
| 0.1997937048949259 | 0.7491084827803326 | 0.6426609247381740 | T | T | T |
| 0.2753042985105942 | 0.7510799802941449 | 0.0427521327752163 | T | T | T |
| 0.1123664211945510 | 0.7482638977174608 | 0.0525450519968366 | T | T | T |
| 0.0603881673030901 | 0.2483429013965572 | 0.1443789214224988 | T | T | T |
| 0.3052769322443711 | 0.2488991056486081 | 0.1474191932396881 | T | T | T |
| 0.2276825956222653 | 0.2474419087659367 | 0.5347971890291766 | T | T | T |
| 0.3904839677093102 | 0.2497067737449387 | 0.5565906121176594 | T | T | T |
| 0.5603957921595450 | 0.2485251361192188 | 0.3708316822456603 | T | T | T |
| 0.8154312482845213 | 0.2555985371469438 | 0.3599787880331623 | T | T | T |
| 0.7256771559318446 | 0.2462372911374132 | 0.9563509128406257 | T | T | T |
| 0.8880631226696477 | 0.2466070575347043 | 0.9590984372266596 | T | T | T |
| 0.9446747990578551 | 0.7490699635715747 | 0.8541995484594638 | T | T | T |
| 0.6730521295633687 | 0.7572928470051640 | 0.8812387684854623 | T | T | T |
| 0.7621553177744620 | 0.7462765211825106 | 0.4449065468753601 | T | T | T |
| 0.6064713889438905 | 0.7488115231778494 | 0.4472264823402433 | T | T | T |
| 0.9197477843222295 | 0.3749587847677121 | 0.5989750283210907 | T | T | T |
| 0.0112992036702948 | 0.8207773445627801 | 0.5213866484581310 | T | T | T |
| 0.9677560490071609 | 0.6995985704251065 | 0.4425586279850984 | T | T | T |
| 0.9639888457926188 | 0.4201678041604158 | 0.5449731794677372 | T | T | T |
| 0.1047748624171734 | 0.6966351290109792 | 0.4446159419002713 | T | T | T |
| 0.9430115624774965 | 0.7951651235507394 | 0.4204212772450551 | T | T | T |
| 0.0336770928822466 | 0.7316251069800340 | 0.5554455436327671 | T | T | T |
| 0.9072275313179992 | 0.8080429527093205 | 0.5759648148092559 | T | T | T |
| 0.9163017253867415 | 0.6994389144478839 | 0.5800761070424926 | T | T | T |
| 0.8826637189637595 | 0.3628993338797648 | 0.5538621387645482 | T | T | T |
| 0.9414601707876737 | 0.4705175621362211 | 0.5384568993066765 | T | T | T |
| 0.9736638378867817 | 0.3997580777787166 | 0.4701498567935550 | T | T | T |

**Structure files (CONTCAR) involved in this work:**

|                     |                    |                    |   |   |   |
|---------------------|--------------------|--------------------|---|---|---|
| 0.0104292899090883  | 0.4231038977658170 | 0.5878890893342998 | T | T | T |
| 0.8921694600825765  | 0.4056285194055957 | 0.6829418404152507 | T | T | T |
| 0.0941532336080566  | 0.7202204604374202 | 0.3719245997507580 | T | T | T |
| 0.1055888970650161  | 0.6419613564522995 | 0.4331132030900851 | T | T | T |
| 0.1551386158606496  | 0.7133100555731662 | 0.4672196688201289 | T | T | T |
| -0.0204154141375875 | 0.6651307415371117 | 0.3806154894003054 | T | T | T |

**Figure S11(a)**

Si Al O Zn H C

1.0000000000000000

20.0219999999999985 0.0000000000000000 0.0000000000000000

0.0000000000000000 19.8990000000000009 0.0000000000000000

0.0000000000000000 0.0000000000000000 13.3829999999999991

92 4 194 4 5 1

Selective dynamics

Direct

|                    |                    |                    |   |   |   |
|--------------------|--------------------|--------------------|---|---|---|
| 0.4231838210650298 | 0.0606477214309719 | 0.6495118426761683 | T | T | T |
| 0.3039853269931352 | 0.0331884009319595 | 0.7913382621185588 | T | T | T |
| 0.2835159238902571 | 0.0559364263231130 | 0.0175070470144385 | T | T | T |
| 0.1237200985552016 | 0.0646653651397147 | 0.0122609252932074 | T | T | T |
| 0.0689353696631324 | 0.0329623263050749 | 0.7984795042885564 | T | T | T |
| 0.1811472406321772 | 0.0695314179034853 | 0.6630769824197725 | T | T | T |
| 0.4147471513845578 | 0.8293953631125836 | 0.6692304469032192 | T | T | T |
| 0.2978430676733867 | 0.8742753111068803 | 0.8037161190331218 | T | T | T |
| 0.2682574286899668 | 0.8321972966274943 | 0.0189510416806378 | T | T | T |
| 0.1119468314354306 | 0.8286950138447960 | 0.0099508090593289 | T | T | T |
| 0.0623427192833771 | 0.8758879867786652 | 0.7970413894162763 | T | T | T |
| 0.0770705440913959 | 0.9428150313685165 | 0.1481041716337163 | T | T | T |
| 0.1962600913020758 | 0.9745321148636725 | 0.2865957317372937 | T | T | T |
| 0.2189969791176910 | 0.9496883839635922 | 0.5120398473096617 | T | T | T |
| 0.3780613777012410 | 0.9378846130083379 | 0.5121060861855949 | T | T | T |
| 0.4352444868880143 | 0.9688184438450760 | 0.3002877229277980 | T | T | T |
| 0.3212812017321446 | 0.9353252386291461 | 0.1646987803313020 | T | T | T |
| 0.0831295282550949 | 0.1765180475794114 | 0.1641585096567700 | T | T | T |
| 0.1997900739574304 | 0.1312040596912620 | 0.2962850016242231 | T | T | T |
| 0.2313332039412911 | 0.1697395360494861 | 0.5134213109986654 | T | T | T |
| 0.3871472746080930 | 0.1734520504425217 | 0.5079795932706201 | T | T | T |
| 0.4357752373291251 | 0.1265774563962709 | 0.2944897275962041 | T | T | T |
| 0.3212244828719958 | 0.1734889230380006 | 0.1645346060566746 | T | T | T |
| 0.5752727033750529 | 0.5560556479341043 | 0.3582404784526453 | T | T | T |
| 0.6875831304061930 | 0.5257787466299856 | 0.2041404858983864 | T | T | T |
| 0.7112909060748862 | 0.5682653465583379 | 0.9896412511009743 | T | T | T |
| 0.8708357692968847 | 0.5702036418175752 | 0.9811302653757066 | T | T | T |
| 0.8119598929304997 | 0.5504125713865118 | 0.3354498286286189 | T | T | T |
| 0.5727352124163948 | 0.3276889082948215 | 0.3308130215625833 | T | T | T |
| 0.6921102961201053 | 0.3726628160581363 | 0.1927080203012920 | T | T | T |
| 0.7314179767043396 | 0.3285230974073575 | 0.9776180215543022 | T | T | T |
| 0.8860226016886903 | 0.3263184006678193 | 0.9898238165689386 | T | T | T |
| 0.9397102285207449 | 0.3771643254585843 | 0.1896012721414196 | T | T | T |
| 0.9198161354521458 | 0.4432245466098897 | 0.8549475178116828 | T | T | T |
| 0.8013220916032222 | 0.4713963665262277 | 0.7184098021431116 | T | T | T |
| 0.7778697082409984 | 0.4357879216137152 | 0.4902855185042005 | T | T | T |
| 0.6191688535195896 | 0.4290063390039954 | 0.4879749466168406 | T | T | T |
| 0.5692956935553773 | 0.4692927048235346 | 0.6989211124854058 | T | T | T |

**Structure files (CONTCAR) involved in this work:**

|                    |                    |                    |   |   |   |
|--------------------|--------------------|--------------------|---|---|---|
| 0.6756790792272404 | 0.4486871058705152 | 0.8548458589952762 | T | T | T |
| 0.9178951654304678 | 0.6781019032183567 | 0.8258082546082013 | T | T | T |
| 0.7685376213288158 | 0.6674126339996586 | 0.4626404747913962 | T | T | T |
| 0.6125160856883185 | 0.6753397432460095 | 0.4876805444309852 | T | T | T |
| 0.5607281882836918 | 0.6280279558871324 | 0.6978188543154089 | T | T | T |
| 0.6733433506650199 | 0.6732230571374900 | 0.8283911264499031 | T | T | T |
| 0.5795404030872137 | 0.9470855632895094 | 0.3576844114593105 | T | T | T |
| 0.7003041382337680 | 0.9753613977957005 | 0.2134454561551301 | T | T | T |
| 0.7195577745483170 | 0.9348889616860088 | 0.9937376434686102 | T | T | T |
| 0.8797020537706794 | 0.9330604702132969 | 0.9992154761254423 | T | T | T |
| 0.9330870800715704 | 0.9752589690179223 | 0.2052594188275587 | T | T | T |
| 0.8237311920108233 | 0.9515754984722802 | 0.3543841753871365 | T | T | T |
| 0.5774511336880290 | 0.1727243820197991 | 0.3324653479112743 | T | T | T |
| 0.6985738831017646 | 0.1317226729451999 | 0.1953968077726005 | T | T | T |
| 0.7322351313420628 | 0.1730984717394139 | 0.9756476031692565 | T | T | T |
| 0.8869818143605297 | 0.1744658582019972 | 0.9866403862783090 | T | T | T |
| 0.9378463257126567 | 0.1319570441730276 | 0.1975619467066017 | T | T | T |
| 0.8211454471475241 | 0.1727075011726024 | 0.3309011268534407 | T | T | T |
| 0.9235917444283195 | 0.0544665183526348 | 0.8590973850892628 | T | T | T |
| 0.8025406121410891 | 0.0289929687749656 | 0.7121703247831144 | T | T | T |
| 0.7812215209665009 | 0.0698991707111191 | 0.4939604190766688 | T | T | T |
| 0.6204883190822358 | 0.0712553703630938 | 0.4933398069015267 | T | T | T |
| 0.5677206809326495 | 0.0322975726847302 | 0.7024668518695930 | T | T | T |
| 0.6787719090658747 | 0.0536562689123823 | 0.8530465566676221 | T | T | T |
| 0.9220774532326369 | 0.8314347384205412 | 0.8464919099493418 | T | T | T |
| 0.8018020541788413 | 0.8719997350000729 | 0.7043383092304123 | T | T | T |
| 0.6127228140476993 | 0.8287219830877532 | 0.4912841323307854 | T | T | T |
| 0.5589920196167945 | 0.8750088919957837 | 0.6979080703764611 | T | T | T |
| 0.6754475061904803 | 0.8330462924617562 | 0.8314457609106259 | T | T | T |
| 0.4230226980272157 | 0.4421361761118913 | 0.6431385511746295 | T | T | T |
| 0.3039168598142225 | 0.4683145928900605 | 0.7868782819170064 | T | T | T |
| 0.2807696613915613 | 0.4464266801434529 | 0.0123779204410254 | T | T | T |
| 0.1232085174048096 | 0.4390799346101607 | 0.0115747545765094 | T | T | T |
| 0.0644207207714426 | 0.4669463945734763 | 0.7992956699629270 | T | T | T |
| 0.1781740987364503 | 0.4305216373880956 | 0.6625366999959359 | T | T | T |
| 0.4149260430745514 | 0.6749368988863411 | 0.6655920672781951 | T | T | T |
| 0.2973637409394690 | 0.6275508810597371 | 0.7968399629800481 | T | T | T |
| 0.2667417893226438 | 0.6706490201510360 | 0.0161811824541911 | T | T | T |
| 0.1113428641193158 | 0.6738222577255565 | 0.0096165097303308 | T | T | T |
| 0.0613297613024371 | 0.6258236322852651 | 0.7970391735606692 | T | T | T |
| 0.1760332725731639 | 0.6696844473052203 | 0.6599447649432435 | T | T | T |
| 0.0728711835595573 | 0.5601634677495250 | 0.1477056694686986 | T | T | T |
| 0.1928232649839036 | 0.5302489431142909 | 0.2865044125808170 | T | T | T |
| 0.2140837623724175 | 0.5512984258029738 | 0.5149280998258210 | T | T | T |
| 0.3737374962785072 | 0.5664886384897675 | 0.5132226583799812 | T | T | T |
| 0.4291248299656541 | 0.5322006002793430 | 0.3025454661076071 | T | T | T |
| 0.3190983550481409 | 0.5658961542313509 | 0.1610160017698748 | T | T | T |
| 0.0848922623138532 | 0.3289981325534767 | 0.1618646821997457 | T | T | T |
| 0.1980924599661272 | 0.3727079271990731 | 0.2975396277421559 | T | T | T |
| 0.2301816886851468 | 0.3308908351597440 | 0.5143104361142793 | T | T | T |
| 0.3849057986483755 | 0.3276824962235431 | 0.5053412957438136 | T | T | T |
| 0.4303445568462733 | 0.3746300368008449 | 0.2926779541822007 | T | T | T |
| 0.3172344004050597 | 0.3298154863789799 | 0.1597857537802018 | T | T | T |



**Structure files (CONTCAR) involved in this work:**

|                    |                    |                    |   |   |   |
|--------------------|--------------------|--------------------|---|---|---|
| 0.9269814857468651 | 0.5314359011908115 | 0.1875148660991479 | T | T | T |
| 0.8214221227415256 | 0.3356121968277442 | 0.3238000155259274 | T | T | T |
| 0.7988271083908491 | 0.6301846672501210 | 0.6946408719302077 | T | T | T |
| 0.1809452621924061 | 0.8311797403776380 | 0.6614863975799109 | T | T | T |
| 0.7710733788861425 | 0.8298247339222410 | 0.4782449059708280 | T | T | T |
| 0.0040896524827087 | 0.5515192692086078 | 0.2109599694735698 | T | T | T |
| 0.3589610926068847 | 0.0706749115927053 | 0.7218732197076581 | T | T | T |
| 0.3161542116075952 | 0.0545320832583324 | 0.9067932519155336 | T | T | T |
| 0.2029038096358613 | 0.0484701780722329 | 0.0112052042916240 | T | T | T |
| 0.0958012018362363 | 0.0690981604136056 | 0.8990310888742731 | T | T | T |
| 0.1039490695733132 | 0.0669436678765679 | 0.7015352773856930 | T | T | T |
| 0.2294151935381431 | 0.0578999055240623 | 0.7595131293708557 | T | T | T |
| 0.3558345305079127 | 0.8288408045316734 | 0.7518399213106416 | T | T | T |
| 0.3055387067398254 | 0.8657763105847647 | 0.9241609938309050 | T | T | T |
| 0.1893029138524439 | 0.8523141656202888 | 0.0174557307578988 | T | T | T |
| 0.0853443448617566 | 0.8349989857039730 | 0.8957324105762967 | T | T | T |
| 0.0930459569338845 | 0.8382087045153293 | 0.6974290353688902 | T | T | T |
| 0.2254023612111246 | 0.8492679101620765 | 0.7681352427469966 | T | T | T |
| 0.3116315283252752 | 0.9527346605719904 | 0.7746711159741644 | T | T | T |
| 0.0876494341649234 | 0.9528965516584927 | 0.8014919597538415 | T | T | T |
| 0.4326155761456749 | 0.1279638308370107 | 0.5818829311051011 | T | T | T |
| 0.4151479610901285 | 0.9964124982869336 | 0.5759672317702129 | T | T | T |
| 0.3893800965795252 | 0.8661650269175860 | 0.5677166349481703 | T | T | T |
| 0.1948036779591202 | 0.1433306316637781 | 0.6143077547859346 | T | T | T |
| 0.1938135933343511 | 0.0123707298253038 | 0.5801485960177041 | T | T | T |
| 0.1974888222685224 | 0.8793079067789523 | 0.5588155632236548 | T | T | T |
| 0.9885959898430998 | 0.0417852784457844 | 0.7891166039229461 | T | T | T |
| 0.9809980410207675 | 0.8715838514016125 | 0.7870422503756194 | T | T | T |
| 0.1420654963879605 | 0.9339374946423216 | 0.2191864360300825 | T | T | T |
| 0.1836215224872020 | 0.9591834951001456 | 0.4031221116442298 | T | T | T |
| 0.2998038683464719 | 0.9557837116967925 | 0.5000407032318985 | T | T | T |
| 0.4123703829780336 | 0.9322640595250786 | 0.4029289631209297 | T | T | T |
| 0.3976608975203447 | 0.9340795673126829 | 0.2056089021317228 | T | T | T |
| 0.2715462990641526 | 0.9510808857698366 | 0.2579839943676489 | T | T | T |
| 0.1424465461955498 | 0.1780740433720814 | 0.2468257905699947 | T | T | T |
| 0.1954599346559617 | 0.1359359163258419 | 0.4169059284079205 | T | T | T |
| 0.3097664416349108 | 0.1484713562915820 | 0.5145888283064897 | T | T | T |
| 0.4137432641479057 | 0.1675489346336561 | 0.3941471462250657 | T | T | T |
| 0.3982003332898148 | 0.1600682755968209 | 0.1985004924749933 | T | T | T |
| 0.2730771365525789 | 0.1571234290154993 | 0.2600479770256860 | T | T | T |
| 0.1872201657415829 | 0.0542214166997748 | 0.2604720076446324 | T | T | T |
| 0.4146174659070612 | 0.0481135591499768 | 0.3050550478981153 | T | T | T |
| 0.0665538870083364 | 0.8741052739105497 | 0.0838497671589584 | T | T | T |
| 0.0848478236227445 | 0.0048475704577485 | 0.0703059763659506 | T | T | T |
| 0.1077030562547712 | 0.1361571507818899 | 0.0653543297061610 | T | T | T |
| 0.3031539697600872 | 0.8616951375065389 | 0.1191295730474975 | T | T | T |
| 0.3137367835244935 | 0.9934799818364320 | 0.0804551542702618 | T | T | T |
| 0.3022511490737415 | 0.1271419810122998 | 0.0693470057182717 | T | T | T |
| 0.5152898016406844 | 0.9600041780189961 | 0.2854963599867997 | T | T | T |
| 0.5161823634695325 | 0.1323490986340360 | 0.2789946662619118 | T | T | T |
| 0.6385662105133612 | 0.5618226877991102 | 0.2835925264904194 | T | T | T |
| 0.6920233425635323 | 0.5741403601346019 | 0.1069356123095399 | T | T | T |
| 0.7913534926499630 | 0.5558203694494682 | 0.9758516846096091 | T | T | T |

**Structure files (CONTCAR) involved in this work:**

|                    |                    |                    |   |   |   |
|--------------------|--------------------|--------------------|---|---|---|
| 0.8957399576284474 | 0.5766260952858010 | 0.0967514524033296 | T | T | T |
| 0.8873308406141936 | 0.5440416122212114 | 0.2927313411050064 | T | T | T |
| 0.7617928032193407 | 0.5208803368299934 | 0.2536795204285192 | T | T | T |
| 0.6374671822945817 | 0.3325705854176012 | 0.2597121929315667 | T | T | T |
| 0.6932420986944509 | 0.3369754206676133 | 0.0832405689189590 | T | T | T |
| 0.8090927628139136 | 0.3526731466756513 | 0.9874863571200911 | T | T | T |
| 0.9124793028238902 | 0.3258284576929445 | 0.1044542309762729 | T | T | T |
| 0.9044016066797476 | 0.3610389137482782 | 0.2955648715230820 | T | T | T |
| 0.7641063015584318 | 0.3721203692848389 | 0.2447203747950743 | T | T | T |
| 0.6644740246045796 | 0.4499909256917251 | 0.1774298272553184 | T | T | T |
| 0.9218114529661191 | 0.4534860589262329 | 0.1533610059338903 | T | T | T |
| 0.5670678456103249 | 0.6265155788467411 | 0.4179220620369898 | T | T | T |
| 0.5865834261327241 | 0.4958027141199128 | 0.4386294471808416 | T | T | T |
| 0.5871057075169032 | 0.3619358139001045 | 0.4397302655304010 | T | T | T |
| 0.7970563447977587 | 0.6280369956121794 | 0.3646012571225786 | T | T | T |
| 0.8044670323334688 | 0.5095662248566946 | 0.4442195919616658 | T | T | T |
| 0.8250145788453561 | 0.3780012986041049 | 0.4431880284948029 | T | T | T |
| 0.0200890686741750 | 0.3701894295880043 | 0.2014371140060579 | T | T | T |
| 0.8551967003431145 | 0.4294631998934346 | 0.7834731771454384 | T | T | T |
| 0.7921010259468084 | 0.4371029563230048 | 0.6092576229064339 | T | T | T |
| 0.6996161614127914 | 0.4281312081250232 | 0.4654044629100081 | T | T | T |
| 0.6056689866920293 | 0.4295357480887972 | 0.6071689973169057 | T | T | T |
| 0.6030337821775621 | 0.4444605446115730 | 0.8026031426169191 | T | T | T |
| 0.7298800612850203 | 0.4761829885595493 | 0.7729071131978916 | T | T | T |
| 0.8619322967320457 | 0.6854179030547728 | 0.7366188015967552 | T | T | T |
| 0.8120413308781642 | 0.6376792096846629 | 0.5610669778387203 | T | T | T |
| 0.6905008614579790 | 0.6497686032419318 | 0.4814280890766582 | T | T | T |
| 0.5877258115476017 | 0.6702944709313662 | 0.6024318067207814 | T | T | T |
| 0.5956114221267741 | 0.6579686159136168 | 0.7983703214369182 | T | T | T |
| 0.7216170381410533 | 0.6442930009975104 | 0.7415310134603283 | T | T | T |
| 0.8312727881983782 | 0.5472396761560071 | 0.6981073293632309 | T | T | T |
| 0.5803237944424487 | 0.5493715419171092 | 0.6824892232056294 | T | T | T |
| 0.9319115499423815 | 0.3773013506154688 | 0.9236507730494365 | T | T | T |
| 0.9098892282816637 | 0.5094719548911472 | 0.9246756940120517 | T | T | T |
| 0.8867355396000342 | 0.6405517173200964 | 0.9230099763560590 | T | T | T |
| 0.6959389899925479 | 0.3744784633644553 | 0.8926834810211118 | T | T | T |
| 0.6726894920873029 | 0.5028070361583385 | 0.9453160797698176 | T | T | T |
| 0.6891320418689350 | 0.6372338628494193 | 0.9353414801238455 | T | T | T |
| 0.4906662814827154 | 0.4512924456970469 | 0.7078827793575335 | T | T | T |
| 0.4801542206519589 | 0.6352242195436926 | 0.7079096849294468 | T | T | T |
| 0.6460954352024689 | 0.9429453932603433 | 0.2890612091620502 | T | T | T |
| 0.7011017226793602 | 0.9307557477664834 | 0.1113228051343335 | T | T | T |
| 0.8002343929009907 | 0.9387010749298915 | 0.9773549182890976 | T | T | T |
| 0.8963315074494324 | 0.9323163638761085 | 0.1171854898886780 | T | T | T |
| 0.8998422957255613 | 0.9598251445888980 | 0.3124818940433574 | T | T | T |
| 0.7737382004940212 | 0.9745708549664929 | 0.2638419172061296 | T | T | T |
| 0.6423344237864973 | 0.1706589334969111 | 0.2604846873281527 | T | T | T |
| 0.6977862220872545 | 0.1645445566756563 | 0.0843433145196113 | T | T | T |
| 0.8098930972704061 | 0.1483895439886835 | 0.9818174608924812 | T | T | T |
| 0.9132201925752463 | 0.1749396373219396 | 0.1009891477572572 | T | T | T |
| 0.8980384918790789 | 0.1556970607059368 | 0.2967647775639242 | T | T | T |
| 0.7716905535840846 | 0.1397671333043351 | 0.2462080114156328 | T | T | T |
| 0.6796712121813506 | 0.0524610668261654 | 0.1871588225743068 | T | T | T |

**Structure files (CONTCAR) involved in this work:**

|                    |                    |                    |   |   |   |
|--------------------|--------------------|--------------------|---|---|---|
| 0.9245991821601321 | 0.0533885339904285 | 0.1733508943652691 | T | T | T |
| 0.5695186533622850 | 0.8764383052647116 | 0.4163839240112567 | T | T | T |
| 0.5844734408735743 | 0.0077325522470246 | 0.4392355054010262 | T | T | T |
| 0.5951134865198654 | 0.1404492658303494 | 0.4408942659327297 | T | T | T |
| 0.8120657742798666 | 0.8760375123014511 | 0.3899917758559546 | T | T | T |
| 0.8152464359569102 | 1.0028542213344707 | 0.4484803263504255 | T | T | T |
| 0.8077539407402010 | 0.1372411246232105 | 0.4390047093375662 | T | T | T |
| 0.0113599580631402 | 0.9549451058445992 | 0.2160224418344910 | T | T | T |
| 0.0174899346920584 | 0.1431098957644649 | 0.2151126047777963 | T | T | T |
| 0.8583448023058703 | 0.0582349132923752 | 0.7880276867744777 | T | T | T |
| 0.8019417327691534 | 0.0741687533029642 | 0.6116377217870176 | T | T | T |
| 0.7006490817759576 | 0.0640345221499735 | 0.4816479517627247 | T | T | T |
| 0.6000238801556464 | 0.0749931586048311 | 0.6106236213858878 | T | T | T |
| 0.6038271449636976 | 0.0510468746317293 | 0.8075802991491631 | T | T | T |
| 0.7297252502302872 | 0.0317389993015322 | 0.7644343535914934 | T | T | T |
| 0.8543505798636691 | 0.8367132643685149 | 0.7807738189907134 | T | T | T |
| 0.8133280283324125 | 0.8303766711148625 | 0.5994072322087933 | T | T | T |
| 0.6892710370765959 | 0.8518190707496618 | 0.4974165154717947 | T | T | T |
| 0.5790627939548727 | 0.8295566625182307 | 0.6022272403977701 | T | T | T |
| 0.5994698366134312 | 0.8496316765976333 | 0.7968414003836060 | T | T | T |
| 0.7265383738220816 | 0.8622445030510332 | 0.7460620358689517 | T | T | T |
| 0.8190481230247696 | 0.9504215798236429 | 0.6861494467925174 | T | T | T |
| 0.5771742531288565 | 0.9531135074379655 | 0.6763413551032028 | T | T | T |
| 0.9326651515605279 | 0.1256075990385432 | 0.9175117339912968 | T | T | T |
| 0.9172111923734355 | 0.9942065782954048 | 0.9410469682451771 | T | T | T |
| 0.9088614192854568 | 0.8618245299893968 | 0.9565264743736526 | T | T | T |
| 0.6936317686666810 | 0.1294569140898009 | 0.8914244620427415 | T | T | T |
| 0.6858388288638280 | 0.0020622998632610 | 0.9465213265056804 | T | T | T |
| 0.6911704547628107 | 0.8679690701623110 | 0.9385645274840443 | T | T | T |
| 0.4893850080613756 | 0.0507499256754684 | 0.7176699937657318 | T | T | T |
| 0.4793405302788887 | 0.8668274253278335 | 0.7181291827204337 | T | T | T |
| 0.3601430227958923 | 0.4318487904905157 | 0.7185119928820817 | T | T | T |
| 0.3156774255388403 | 0.4481225729836377 | 0.9028737348166844 | T | T | T |
| 0.2010313902064521 | 0.4603633771258702 | 0.0010781339267224 | T | T | T |
| 0.0892768758146669 | 0.4326489384109223 | 0.9020911791934706 | T | T | T |
| 0.1019257586354539 | 0.4329491600297846 | 0.7045820949389144 | T | T | T |
| 0.2294055829010104 | 0.4437993015496933 | 0.7547657665274545 | T | T | T |
| 0.3564354786363698 | 0.6727001559764881 | 0.7496631899760765 | T | T | T |
| 0.2985205449121381 | 0.6375507804613706 | 0.9163132758545526 | T | T | T |
| 0.1882369766148962 | 0.6490300348376664 | 0.0203385904466140 | T | T | T |
| 0.0869330251834507 | 0.6662508471006643 | 0.8942230819082498 | T | T | T |
| 0.0968506439946418 | 0.6595968631705531 | 0.6978317852387231 | T | T | T |
| 0.2246888607389518 | 0.6510102543922568 | 0.7531310072821289 | T | T | T |
| 0.3097831900265881 | 0.5490486283492594 | 0.7691841033323806 | T | T | T |
| 0.0812361517813301 | 0.5472186698210684 | 0.8024313279725575 | T | T | T |
| 0.4321610450107533 | 0.3763988314839180 | 0.5723716280563926 | T | T | T |
| 0.4133774446897136 | 0.5080606643380656 | 0.5732181898786771 | T | T | T |
| 0.3867771984971620 | 0.6389775262749059 | 0.5647533696041820 | T | T | T |
| 0.1915872013811581 | 0.3571240133088694 | 0.6138653349089397 | T | T | T |
| 0.1857736006923647 | 0.4881748439025593 | 0.5779451325961987 | T | T | T |
| 0.1885254067643265 | 0.6207218993539618 | 0.5654334726554445 | T | T | T |
| 0.9846575769140380 | 0.4553969794117793 | 0.7836701549166787 | T | T | T |
| 0.9811576595055833 | 0.6350009110083262 | 0.7824028412020905 | T | T | T |

**Structure files (CONTCAR) involved in this work:**

|                    |                    |                    |   |   |   |
|--------------------|--------------------|--------------------|---|---|---|
| 0.1352751601162279 | 0.5693669789255034 | 0.2238288614557644 | T | T | T |
| 0.1826524928426619 | 0.5476689423925684 | 0.4036089393763380 | T | T | T |
| 0.2947174613987927 | 0.5485084778795433 | 0.5121308608477493 | T | T | T |
| 0.4017373121571054 | 0.5713299797672362 | 0.4003639065380933 | T | T | T |
| 0.3947248420536444 | 0.5651067533190709 | 0.2042830326443568 | T | T | T |
| 0.2668239959963863 | 0.5544031981287113 | 0.2528473653092415 | T | T | T |
| 0.1389154307317546 | 0.3266934936876024 | 0.2521084179824051 | T | T | T |
| 0.1965243939262620 | 0.3672895443569882 | 0.4179781311637673 | T | T | T |
| 0.3082128567504706 | 0.3534104987981479 | 0.5192335127714466 | T | T | T |
| 0.4058819499758278 | 0.3308202642653955 | 0.3883440546289871 | T | T | T |
| 0.3937478561667700 | 0.3475645324840017 | 0.1917554630574289 | T | T | T |
| 0.2700093774949332 | 0.3474070897671058 | 0.2558651158268702 | T | T | T |
| 0.1846002534608917 | 0.4502906991117791 | 0.2643868567402949 | T | T | T |
| 0.4103535402563996 | 0.4529024975149835 | 0.3117236010227224 | T | T | T |
| 0.0644522097837485 | 0.6275494723540862 | 0.0803124253349316 | T | T | T |
| 0.0830755536255099 | 0.4959558752630084 | 0.0744792620041308 | T | T | T |
| 0.1170344184254949 | 0.3664395957204482 | 0.0650999453566976 | T | T | T |
| 0.3053048097112489 | 0.6389659456642437 | 0.1115959833117038 | T | T | T |
| 0.3122934976438744 | 0.5060406966902304 | 0.0796037410349772 | T | T | T |
| 0.2945624084408798 | 0.3736563587618781 | 0.0630752550980571 | T | T | T |
| 0.5091891121824764 | 0.5416072488778310 | 0.2921451479869424 | T | T | T |
| 0.5104364856126864 | 0.3666621999984177 | 0.2777845136312620 | T | T | T |
| 0.4336269449368328 | 0.7521003402187394 | 0.6406265792860906 | T | T | T |
| 0.1781662771353333 | 0.7464799308208424 | 0.6238995346544559 | T | T | T |
| 0.2756485731056140 | 0.7510420428558457 | 0.0171228812810801 | T | T | T |
| 0.1035291030854666 | 0.7509966130628807 | 0.0444122538286460 | T | T | T |
| 0.0658112975234315 | 0.2530085214830505 | 0.1298951879841035 | T | T | T |
| 0.3112445984560336 | 0.2512176724327170 | 0.1301658416234203 | T | T | T |
| 0.2233832756928067 | 0.2505485858452342 | 0.5064609977899801 | T | T | T |
| 0.3928524516084411 | 0.2511556516000212 | 0.5443192129051811 | T | T | T |
| 0.5540675571799489 | 0.2498455252738154 | 0.3506914928694206 | T | T | T |
| 0.8102430496415930 | 0.2516249111869728 | 0.3408698131531541 | T | T | T |
| 0.7279491351847266 | 0.2511226741962326 | 0.9406651897022927 | T | T | T |
| 0.8921869182456509 | 0.2510617900810013 | 0.9439829226516743 | T | T | T |
| 0.9436421393235314 | 0.7526987652858217 | 0.8563877598605881 | T | T | T |
| 0.6857156706138123 | 0.7529581172924736 | 0.8441606000800712 | T | T | T |
| 0.7870969750639507 | 0.7448726349514360 | 0.4548507479610320 | T | T | T |
| 0.6059019680314498 | 0.7516968008824102 | 0.4485317059005314 | T | T | T |
| 0.9369600798946239 | 0.4925298684590089 | 0.5080493109820784 | T | T | T |
| 0.9670671505546743 | 0.7340677911585787 | 0.5685526595435093 | T | T | T |
| 0.9312327824119984 | 0.3898996610698079 | 0.4539643900906705 | T | T | T |
| 0.8750595614737431 | 0.5562393972024867 | 0.5531899804024007 | T | T | T |
| 0.8734202750598132 | 0.7500081475009107 | 0.5999197059773677 | T | T | T |
| 0.0533284425218044 | 0.7600662595522453 | 0.6238190041716897 | T | T | T |
| 0.9803019976541348 | 0.4937651671554154 | 0.5411710943214051 | T | T | T |
| 0.9722303588333099 | 0.7029906539502816 | 0.5117420390434975 | T | T | T |
| 0.0570664858791693 | 0.3824591883639774 | 0.4648707098014087 | T | T | T |
| 1.0213526247604028 | 0.3499302944988369 | 0.5771750173569750 | T | T | T |
| 1.0221697730429045 | 0.3000223352730980 | 0.4655769295354522 | T | T | T |
| 1.0166254754890385 | 0.3511145417964245 | 0.4954468506487578 | T | T | T |

**Figure S11(b)**

Si Al O Zn H C

1.00000000000000

**Structure files (CONTCAR) involved in this work:**

```
20.0219999999999985 0.0000000000000000 0.0000000000000000
0.0000000000000000 19.8990000000000009 0.0000000000000000
0.0000000000000000 0.0000000000000000 13.3829999999999991
92 4 194 4 5 1
```

Selective dynamics

Direct

|                    |                    |                    |   |   |   |
|--------------------|--------------------|--------------------|---|---|---|
| 0.4230478913395930 | 0.0606995066226580 | 0.6495574144719807 | T | T | T |
| 0.3028471376809496 | 0.0335325728038454 | 0.7903798477111619 | T | T | T |
| 0.2836674619047568 | 0.0555391849494489 | 0.0176304461180819 | T | T | T |
| 0.1236182428434898 | 0.0635260134847896 | 0.0118413659922997 | T | T | T |
| 0.0692813709786083 | 0.0310176327664656 | 0.7957845015612012 | T | T | T |
| 0.1808880744682046 | 0.0716575826354718 | 0.6623241264205242 | T | T | T |
| 0.4145466088094605 | 0.8295917867821724 | 0.6710494456684493 | T | T | T |
| 0.2948157056700850 | 0.8745711899886431 | 0.8011210995559104 | T | T | T |
| 0.2681793550812962 | 0.8323797813282560 | 0.0177152638751251 | T | T | T |
| 0.1117044647052147 | 0.8288126878064099 | 0.0109017003924977 | T | T | T |
| 0.0622902528170683 | 0.8741194231480210 | 0.7955625102442826 | T | T | T |
| 0.0770952726788001 | 0.9423574704918777 | 0.1493643271110928 | T | T | T |
| 0.1969483071153135 | 0.9738853190315999 | 0.2862762508388957 | T | T | T |
| 0.2176905425369641 | 0.9503725504183075 | 0.5131497814095439 | T | T | T |
| 0.3777221910223407 | 0.9374024060613108 | 0.5129875862481784 | T | T | T |
| 0.4353162002299107 | 0.9687290563736289 | 0.3008071196461664 | T | T | T |
| 0.3218806254367325 | 0.9345751779770126 | 0.1646289896920936 | T | T | T |
| 0.0830970193895040 | 0.1759604794487486 | 0.1621143539719823 | T | T | T |
| 0.2005762796700185 | 0.1304622977692454 | 0.2938599097401709 | T | T | T |
| 0.2308649320833629 | 0.1697907915268809 | 0.5108905366940414 | T | T | T |
| 0.3867320410584675 | 0.1734561233851205 | 0.5077374049174345 | T | T | T |
| 0.4359849447207698 | 0.1266681541656878 | 0.2943464740323611 | T | T | T |
| 0.3220223726211782 | 0.1735278332938777 | 0.1631172637827762 | T | T | T |
| 0.5750381574829799 | 0.5584683152713774 | 0.3583868981480244 | T | T | T |
| 0.6896530003281632 | 0.5269017575314807 | 0.2095447702385720 | T | T | T |
| 0.7129454146115762 | 0.5670661290334950 | 0.9917416253635051 | T | T | T |
| 0.8719877474008609 | 0.5706349036463524 | 0.9849013858518110 | T | T | T |
| 0.8139500077992160 | 0.5515807624907585 | 0.3452697724568982 | T | T | T |
| 0.5744585263331448 | 0.3280704165288169 | 0.3300035809523067 | T | T | T |
| 0.6916387443709142 | 0.3736721283065941 | 0.1895455953410376 | T | T | T |
| 0.7306370893236823 | 0.3291270489410078 | 0.9744335382504541 | T | T | T |
| 0.8858558440448534 | 0.3265386222443613 | 0.9880456599426518 | T | T | T |
| 0.9398198299167714 | 0.3767534846786824 | 0.1895284586443244 | T | T | T |
| 0.9205684586303740 | 0.4460028271729279 | 0.8551759461169046 | T | T | T |
| 0.8012143531386571 | 0.4740726185177070 | 0.7130686871843498 | T | T | T |
| 0.7793694375733048 | 0.4375274904970591 | 0.4918843214000554 | T | T | T |
| 0.6209783770336732 | 0.4314316951217878 | 0.4859733612692693 | T | T | T |
| 0.5705262483818856 | 0.4701693461318159 | 0.6969474747377766 | T | T | T |
| 0.6777408346404379 | 0.4500412684720603 | 0.8527732534026973 | T | T | T |
| 0.9177143633841952 | 0.6774218487440137 | 0.8301703709000224 | T | T | T |
| 0.7645796438944439 | 0.6743329560943597 | 0.4609922848067622 | T | T | T |
| 0.6127402291486024 | 0.6757840027126766 | 0.4894688970127141 | T | T | T |
| 0.5602441370124340 | 0.6285255898984934 | 0.6986309510102333 | T | T | T |
| 0.6732756174066811 | 0.6709349128110974 | 0.8308374335983225 | T | T | T |
| 0.5799530838866166 | 0.9463885827743304 | 0.3585413940539398 | T | T | T |
| 0.7007467125568180 | 0.9740372868654302 | 0.2139160526411734 | T | T | T |
| 0.7197605174278354 | 0.9337793520352879 | 0.9942568395780845 | T | T | T |

**Structure files (CONTCAR) involved in this work:**

|                    |                    |                    |   |   |   |
|--------------------|--------------------|--------------------|---|---|---|
| 0.8797702503345493 | 0.9327768595280862 | 1.0001321193917669 | T | T | T |
| 0.9332909751527554 | 0.9752075036042208 | 0.2055564300788024 | T | T | T |
| 0.8246254543956624 | 0.9533457787084885 | 0.3561101717566099 | T | T | T |
| 0.5777410014964836 | 0.1727606798087018 | 0.3336503892815966 | T | T | T |
| 0.6988726240587800 | 0.1303371430401295 | 0.1966758443332741 | T | T | T |
| 0.7318160056192202 | 0.1728453222347233 | 0.9765441228078462 | T | T | T |
| 0.8871997345130089 | 0.1742103694074758 | 0.9847909136316340 | T | T | T |
| 0.9379327178953735 | 0.1318088244486575 | 0.1966700092022125 | T | T | T |
| 0.8211868126641959 | 0.1726051242250023 | 0.3315705438153003 | T | T | T |
| 0.9235068133581789 | 0.0522212001194135 | 0.8582574465058316 | T | T | T |
| 0.8014737424837253 | 0.0248633143782322 | 0.7106395428550067 | T | T | T |
| 0.7814441446485647 | 0.0720606582459158 | 0.4949519203039183 | T | T | T |
| 0.6207788722112644 | 0.0712958852632357 | 0.4937700698056393 | T | T | T |
| 0.5678683234987911 | 0.0319397587309673 | 0.7032226863033282 | T | T | T |
| 0.6788312365567736 | 0.0521074006445236 | 0.8542740125122352 | T | T | T |
| 0.9213911852406607 | 0.8310604827122792 | 0.8460103285257760 | T | T | T |
| 0.8009583249210769 | 0.8676392427056943 | 0.6998500257186920 | T | T | T |
| 0.6133242629709716 | 0.8300898974703337 | 0.4944173195279771 | T | T | T |
| 0.5583820429539064 | 0.8744478831502798 | 0.7003275152739110 | T | T | T |
| 0.6757421324469505 | 0.8309175649002525 | 0.8318085788764991 | T | T | T |
| 0.4234293754934574 | 0.4425901549431365 | 0.6425590010479227 | T | T | T |
| 0.3037502368719455 | 0.4677342447770479 | 0.7862868952177480 | T | T | T |
| 0.2810858129362175 | 0.4467142218655947 | 0.0124903894036977 | T | T | T |
| 0.1231604701585499 | 0.4401113615215655 | 0.0111300513300771 | T | T | T |
| 0.0656869270049768 | 0.4688395626519403 | 0.7966015499206923 | T | T | T |
| 0.1787723534598272 | 0.4285763581087300 | 0.6614390199472964 | T | T | T |
| 0.4147184059142333 | 0.6748928437520217 | 0.6665366414526109 | T | T | T |
| 0.2949826874643076 | 0.6269030076691999 | 0.7949472710817086 | T | T | T |
| 0.2667461113371302 | 0.6708628071991399 | 0.0151844179953114 | T | T | T |
| 0.1112673263384369 | 0.6735635427926383 | 0.0109544031224939 | T | T | T |
| 0.0616622547061624 | 0.6271944896270780 | 0.7962656641679384 | T | T | T |
| 0.1747712969937391 | 0.6707990432838690 | 0.6579823341592581 | T | T | T |
| 0.0725337050756568 | 0.5603124476264757 | 0.1487442476445619 | T | T | T |
| 0.1933532514924628 | 0.5307149209963330 | 0.2859472428710128 | T | T | T |
| 0.2131117464339969 | 0.5509693563142987 | 0.5154289418516639 | T | T | T |
| 0.3734459026120248 | 0.5676149355484086 | 0.5131442929280485 | T | T | T |
| 0.4292915920946320 | 0.5328740070291753 | 0.3021503693313445 | T | T | T |
| 0.3194206557599304 | 0.5667178824592102 | 0.1603815609984605 | T | T | T |
| 0.0849591698758118 | 0.3289625482582403 | 0.1603271074161120 | T | T | T |
| 0.1989121026673491 | 0.3731096952818094 | 0.2957808130703185 | T | T | T |
| 0.2299302582482014 | 0.3305422921264685 | 0.5120448038217884 | T | T | T |
| 0.3846289333132843 | 0.3278861279124867 | 0.5047410340859839 | T | T | T |
| 0.4311523158195186 | 0.3749471256444700 | 0.2924660834745047 | T | T | T |
| 0.3182829494137006 | 0.3298550159103741 | 0.1589818356523385 | T | T | T |
| 0.9265426559254774 | 0.5315552110104499 | 0.1920141833162674 | T | T | T |
| 0.8192581224742980 | 0.3353255573490472 | 0.3211775939516790 | T | T | T |
| 0.7973583748117513 | 0.6325613372280237 | 0.6899301448687950 | T | T | T |
| 0.1792053016000125 | 0.8285379567308992 | 0.6581699916989635 | T | T | T |
| 0.7680883293353193 | 0.8306980312899114 | 0.4764055350013646 | T | T | T |
| 0.0041902456667896 | 0.5509651765956680 | 0.2125922138784504 | T | T | T |
| 0.3591736935874396 | 0.0703431187350651 | 0.7226497673639904 | T | T | T |
| 0.3156330087114945 | 0.0525796865640039 | 0.9065834551000295 | T | T | T |
| 0.2029924933322054 | 0.0488582515753617 | 0.0120351400045436 | T | T | T |

**Structure files (CONTCAR) involved in this work:**

|                    |                    |                    |   |   |   |
|--------------------|--------------------|--------------------|---|---|---|
| 0.0963737969065403 | 0.0645107028420638 | 0.8981192045238917 | T | T | T |
| 0.1036914373093125 | 0.0682253183923538 | 0.7010225768520847 | T | T | T |
| 0.2293510356266825 | 0.0616999283479070 | 0.7590230857805809 | T | T | T |
| 0.3538011769312922 | 0.8297255895798066 | 0.7507566521235338 | T | T | T |
| 0.3026642019425218 | 0.8673574610604302 | 0.9218094752296869 | T | T | T |
| 0.1890456364214556 | 0.8518567875296359 | 0.0203230988684059 | T | T | T |
| 0.0861668182081237 | 0.8366742557615522 | 0.8962836843898884 | T | T | T |
| 0.0902762151854666 | 0.8299345050196671 | 0.6983587803438793 | T | T | T |
| 0.2226479506167570 | 0.8484160256218883 | 0.7656107981114755 | T | T | T |
| 0.3073661953925132 | 0.9531446326091070 | 0.7709505376311674 | T | T | T |
| 0.0885225601234028 | 0.9507456713608424 | 0.7909557897432266 | T | T | T |
| 0.4319650198854297 | 0.1282079991930902 | 0.5821082655292052 | T | T | T |
| 0.4144161292402643 | 0.9967346764927489 | 0.5757416121177207 | T | T | T |
| 0.3912735053645933 | 0.8660269517958127 | 0.5681681391984104 | T | T | T |
| 0.1931621445095475 | 0.1453216832038668 | 0.6119522263974694 | T | T | T |
| 0.1947404917688836 | 0.0145139198771010 | 0.5800368644208136 | T | T | T |
| 0.1913407724358885 | 0.8815690884142435 | 0.5596927142867673 | T | T | T |
| 0.9888721716704205 | 0.0393966973875786 | 0.7889221458607660 | T | T | T |
| 0.9809261018305880 | 0.8710437607973280 | 0.7871242884503945 | T | T | T |
| 0.1420613747710169 | 0.9331841677231760 | 0.2203383829010582 | T | T | T |
| 0.1841861044532703 | 0.9610321990327995 | 0.4032599040642690 | T | T | T |
| 0.2987901883141682 | 0.9529713958206306 | 0.5033788724080930 | T | T | T |
| 0.4109686646463129 | 0.9326582748029022 | 0.4030006450402308 | T | T | T |
| 0.3981566780823486 | 0.9339219750973247 | 0.2057061577746625 | T | T | T |
| 0.2716732037302134 | 0.9485324021812384 | 0.2580475905853330 | T | T | T |
| 0.1430561653893424 | 0.1768879112894615 | 0.2437252327967699 | T | T | T |
| 0.1956760402531464 | 0.1350599519338690 | 0.4144625903484833 | T | T | T |
| 0.3092598788724613 | 0.1485508623265457 | 0.5143752452222423 | T | T | T |
| 0.4132988725056495 | 0.1674070713896341 | 0.3939195810091060 | T | T | T |
| 0.3987623655211511 | 0.1600183065654843 | 0.1979070908389494 | T | T | T |
| 0.2736079752597940 | 0.1574181917999806 | 0.2584340124792797 | T | T | T |
| 0.1891567414611721 | 0.0533900614235267 | 0.2577419436635411 | T | T | T |
| 0.4150893884968796 | 0.0481774929317188 | 0.3047017526247492 | T | T | T |
| 0.0659990556628501 | 0.8739692951720249 | 0.0845860276313882 | T | T | T |
| 0.0852790762233030 | 0.0044720101645849 | 0.0719124766472603 | T | T | T |
| 0.1060214310772987 | 0.1357155300563996 | 0.0621490731485412 | T | T | T |
| 0.3048642185393758 | 0.8613014348885453 | 0.1168497412833350 | T | T | T |
| 0.3136095458157574 | 0.9936352300290771 | 0.0819139089616534 | T | T | T |
| 0.3031259764298102 | 0.1271668259118418 | 0.0678517300304080 | T | T | T |
| 0.5153598008238953 | 0.9597234325565062 | 0.2871192152936266 | T | T | T |
| 0.5162802490911731 | 0.1333077342918039 | 0.2791931880820152 | T | T | T |
| 0.6381267819353023 | 0.5647738881313005 | 0.2834208393097037 | T | T | T |
| 0.6973621885307819 | 0.5728267227567585 | 0.1101781809621481 | T | T | T |
| 0.7929561459172704 | 0.5558344035414956 | 0.9740173734578089 | T | T | T |
| 0.8942645882863062 | 0.5760185237754845 | 0.1016895382351283 | T | T | T |
| 0.8883965912572718 | 0.5438431119302429 | 0.2980773416472302 | T | T | T |
| 0.7617212101312131 | 0.5213330896414156 | 0.2658708853874224 | T | T | T |
| 0.6379938585379964 | 0.3317530733720495 | 0.2560153666549219 | T | T | T |
| 0.6905317566314538 | 0.3414407276647078 | 0.0776726458793939 | T | T | T |
| 0.8086793680717127 | 0.3516109490700923 | 0.9869361408577275 | T | T | T |
| 0.9126778868408945 | 0.3268206625850886 | 0.1028636935017422 | T | T | T |
| 0.9044934393537911 | 0.3586649869401113 | 0.2960399369907288 | T | T | T |
| 0.7649427252563444 | 0.3709420078482927 | 0.2376714209375458 | T | T | T |

**Structure files (CONTCAR) involved in this work:**

|                    |                    |                    |   |   |   |
|--------------------|--------------------|--------------------|---|---|---|
| 0.6650416969502847 | 0.4515939037734791 | 0.1822897510805049 | T | T | T |
| 0.9212578393908719 | 0.4534367660898614 | 0.1577414809703897 | T | T | T |
| 0.5657629371864450 | 0.6284938623606694 | 0.4189590111121893 | T | T | T |
| 0.5859718730433160 | 0.4972842823526105 | 0.4376036820882988 | T | T | T |
| 0.5909966261692330 | 0.3633321685210129 | 0.4374207478976984 | T | T | T |
| 0.7999583354568277 | 0.6287347624958736 | 0.3743323825181351 | T | T | T |
| 0.8110881914940336 | 0.5102840072080718 | 0.4533076758032103 | T | T | T |
| 0.8234444784258778 | 0.3782178618971541 | 0.4400171872771089 | T | T | T |
| 0.0200183550053124 | 0.3691356626509242 | 0.2026012121328328 | T | T | T |
| 0.8565548742299302 | 0.4367699593462980 | 0.7818117442011102 | T | T | T |
| 0.7906685955156294 | 0.4311314093298477 | 0.6112379070505254 | T | T | T |
| 0.7013054344740272 | 0.4336035982999082 | 0.4625386125208742 | T | T | T |
| 0.6075209800952630 | 0.4307580820670929 | 0.6053313628007885 | T | T | T |
| 0.6047444796157252 | 0.4465695021625653 | 0.8010628823002905 | T | T | T |
| 0.7313019564486674 | 0.4806033019031302 | 0.7720440265125761 | T | T | T |
| 0.8605864305482196 | 0.6827813975302010 | 0.7442948344385736 | T | T | T |
| 0.8070497887942505 | 0.6656002875264414 | 0.5673498728334130 | T | T | T |
| 0.6892370321521283 | 0.6462177890120170 | 0.4829623792682519 | T | T | T |
| 0.5864186123843536 | 0.6718604188375542 | 0.6038426185113153 | T | T | T |
| 0.5953930188558471 | 0.6565800877528239 | 0.8001177485820404 | T | T | T |
| 0.7216551652260460 | 0.6404266643936097 | 0.7458315443160095 | T | T | T |
| 0.8288233139799855 | 0.5489156779547717 | 0.6790652948606855 | T | T | T |
| 0.5800152033386133 | 0.5502534285151236 | 0.6798419641588214 | T | T | T |
| 0.9304784195379046 | 0.3780725932385217 | 0.9206378694096889 | T | T | T |
| 0.9128516213924178 | 0.5107488492311949 | 0.9285866406409965 | T | T | T |
| 0.8895740516146597 | 0.6417726863229161 | 0.9306824789193665 | T | T | T |
| 0.6986651799435053 | 0.3746497776214930 | 0.8857079967350998 | T | T | T |
| 0.6749977251922613 | 0.5008968676726950 | 0.9477052509258002 | T | T | T |
| 0.6880819638513805 | 0.6356334686520982 | 0.9388690697478437 | T | T | T |
| 0.4919578616563085 | 0.4512871676608015 | 0.7053886800782170 | T | T | T |
| 0.4795684317358540 | 0.6353700326576037 | 0.7106695477085677 | T | T | T |
| 0.6461255633303623 | 0.9419311827628037 | 0.2891322363442461 | T | T | T |
| 0.7017170881066177 | 0.9291618224504536 | 0.1119760516577188 | T | T | T |
| 0.8004487971384191 | 0.9394083802884259 | 0.9780340325938683 | T | T | T |
| 0.8966920438952591 | 0.9315803838250213 | 0.1180265511189180 | T | T | T |
| 0.9004382824818495 | 0.9610163540115378 | 0.3130747251949940 | T | T | T |
| 0.7740251603480283 | 0.9734760075064626 | 0.2647020169794085 | T | T | T |
| 0.6429167159368898 | 0.1691799224712069 | 0.2623894835902851 | T | T | T |
| 0.6984503875642277 | 0.1641023248678994 | 0.0860791410454158 | T | T | T |
| 0.8098319551316426 | 0.1493241322002025 | 0.9819209593724458 | T | T | T |
| 0.9143348742704438 | 0.1741588432245544 | 0.0988205680157208 | T | T | T |
| 0.8979824859325904 | 0.1561932427170921 | 0.2956490913832706 | T | T | T |
| 0.7717690194805797 | 0.1377520337170169 | 0.2487266871315012 | T | T | T |
| 0.6801370266497389 | 0.0511617275477282 | 0.1868617405063442 | T | T | T |
| 0.9248603175512644 | 0.0532588215883597 | 0.1727223006115418 | T | T | T |
| 0.5694317704989618 | 0.8759647793051117 | 0.4174298939391137 | T | T | T |
| 0.5858547331806981 | 0.0072943237187608 | 0.4395876766654829 | T | T | T |
| 0.5935945062576417 | 0.1402418040500966 | 0.4425119909575103 | T | T | T |
| 0.8139549542615959 | 0.8794414704361748 | 0.3972665174812500 | T | T | T |
| 0.8168208165264725 | 0.0070559962271078 | 0.4468341909514000 | T | T | T |
| 0.8089659009527691 | 0.1400711943081966 | 0.4421661473085586 | T | T | T |
| 0.0115000136268966 | 0.9550145527494487 | 0.2169386576493837 | T | T | T |
| 0.0175468237791308 | 0.1434929631921241 | 0.2147944405856673 | T | T | T |



**Structure files (CONTCAR) involved in this work:**

|                    |                    |                    |   |   |   |
|--------------------|--------------------|--------------------|---|---|---|
| 0.8586839244137188 | 0.0514315300650546 | 0.7864363201039190 | T | T | T |
| 0.8006838160906590 | 0.0734073158833610 | 0.6133969186565280 | T | T | T |
| 0.7010420258341086 | 0.0665876733755423 | 0.4804745397249403 | T | T | T |
| 0.6010677743896186 | 0.0739351566670522 | 0.6113795775386872 | T | T | T |
| 0.6039348967612538 | 0.0509501499074798 | 0.8082764050674718 | T | T | T |
| 0.7298112089630818 | 0.0284111320075840 | 0.7664798664973944 | T | T | T |
| 0.8548277269134288 | 0.8360563951077520 | 0.7781372664447093 | T | T | T |
| 0.8120266611169775 | 0.8224200244897036 | 0.5974515960547185 | T | T | T |
| 0.6883310588617836 | 0.8580046397927618 | 0.5042410075192356 | T | T | T |
| 0.5770449208347661 | 0.8294694894432031 | 0.6036299278705315 | T | T | T |
| 0.5997180711258402 | 0.8486377805728980 | 0.7982483426045853 | T | T | T |
| 0.7265567522220281 | 0.8582681784236416 | 0.7448986354041979 | T | T | T |
| 0.8158662019458387 | 0.9465935175417733 | 0.6784902490965998 | T | T | T |
| 0.5766069988653824 | 0.9525612970780778 | 0.6786927872119288 | T | T | T |
| 0.9308953206700609 | 0.1249290659854225 | 0.9132433393480134 | T | T | T |
| 0.9184687241454633 | 0.9938567015674878 | 0.9433577951750598 | T | T | T |
| 0.9078602638170095 | 0.8614884989441163 | 0.9558464163036874 | T | T | T |
| 0.6942632790993031 | 0.1279174747628194 | 0.8926902351181750 | T | T | T |
| 0.6846313939692228 | 0.0006157221537998 | 0.9480949958279150 | T | T | T |
| 0.6927804295977280 | 0.8667125315674888 | 0.9380078580826838 | T | T | T |
| 0.4895874598652071 | 0.0511083036543978 | 0.7170388103025733 | T | T | T |
| 0.4787094610164090 | 0.8666262949296778 | 0.7220903056094184 | T | T | T |
| 0.3612883123822993 | 0.4322254978664757 | 0.7193651540717310 | T | T | T |
| 0.3154703263016774 | 0.4489017002115527 | 0.9027243266701437 | T | T | T |
| 0.2012178853088089 | 0.4601684164923658 | 0.0022139839423292 | T | T | T |
| 0.0905763858499965 | 0.4363315312675149 | 0.9004701955377575 | T | T | T |
| 0.1021040700832676 | 0.4322667095022912 | 0.7027121416087064 | T | T | T |
| 0.2299275125925525 | 0.4406316231540131 | 0.7540353064617639 | T | T | T |
| 0.3541808360987523 | 0.6717337803219441 | 0.7475216252179256 | T | T | T |
| 0.2962631698404163 | 0.6367423831837613 | 0.9145656684810408 | T | T | T |
| 0.1882265241258244 | 0.6496973710888531 | 0.0238299550221036 | T | T | T |
| 0.0885091935269817 | 0.6643900352650457 | 0.8951558798711455 | T | T | T |
| 0.0945708975872491 | 0.6677264980686332 | 0.6992050672868014 | T | T | T |
| 0.2218118766355583 | 0.6497834609913763 | 0.7522444803845072 | T | T | T |
| 0.3072149676136932 | 0.5483760968430171 | 0.7671911332319237 | T | T | T |
| 0.0836132945997690 | 0.5490455483956268 | 0.7926297553978054 | T | T | T |
| 0.4316879788640530 | 0.3766777172435893 | 0.5717792647537457 | T | T | T |
| 0.4121517426446821 | 0.5083445447563020 | 0.5728767738880808 | T | T | T |
| 0.3889002683267470 | 0.6398482937784776 | 0.5636927621161180 | T | T | T |
| 0.1903301092594754 | 0.3549511708393677 | 0.6120050363716183 | T | T | T |
| 0.1882028061917575 | 0.4853587899153749 | 0.5762338529023191 | T | T | T |
| 0.1819470345396032 | 0.6174315477061257 | 0.5676084242501127 | T | T | T |
| 0.9856559518909180 | 0.4578486540523642 | 0.7838551857667555 | T | T | T |
| 0.9812054279782855 | 0.6344157804612162 | 0.7863873055327230 | T | T | T |
| 0.1351795376448692 | 0.5695202283895278 | 0.2242130432269033 | T | T | T |
| 0.1829820331220720 | 0.5465482402205308 | 0.4033721091381473 | T | T | T |
| 0.2937190518576677 | 0.5528104903370571 | 0.5141439387450736 | T | T | T |
| 0.4003409051984619 | 0.5711469579532598 | 0.3996751876497812 | T | T | T |
| 0.3948758170066147 | 0.5654890404237850 | 0.2036793658497643 | T | T | T |
| 0.2667690709488230 | 0.5563128240285572 | 0.2521071416236244 | T | T | T |
| 0.1394679873195163 | 0.3274851957541171 | 0.2498841968009380 | T | T | T |
| 0.1961967828282113 | 0.3678733831040021 | 0.4163668993681232 | T | T | T |
| 0.3077277288838872 | 0.3534166951693092 | 0.5188160742226723 | T | T | T |

**Structure files (CONTCAR) involved in this work:**

|                    |                    |                    |   |   |   |
|--------------------|--------------------|--------------------|---|---|---|
| 0.4056515236868249 | 0.3312810451925155 | 0.3878038835570792 | T | T | T |
| 0.3945975074709890 | 0.3479091348188263 | 0.1913591716176818 | T | T | T |
| 0.2706500422315043 | 0.3469092129336339 | 0.2550303711419287 | T | T | T |
| 0.1861712076062891 | 0.4507201007886931 | 0.2623066918826190 | T | T | T |
| 0.4114645795713440 | 0.4532905351977624 | 0.3108315768600815 | T | T | T |
| 0.0638078395326843 | 0.6275844814688344 | 0.0811962282343569 | T | T | T |
| 0.0829389349026040 | 0.4962834903734009 | 0.0750848541430463 | T | T | T |
| 0.1150495402398119 | 0.3668719926680947 | 0.0625345150764538 | T | T | T |
| 0.3066697486879659 | 0.6395677888937411 | 0.1095711803166766 | T | T | T |
| 0.3122326166215134 | 0.5063119603467077 | 0.0799017544570556 | T | T | T |
| 0.2953816056798733 | 0.3738261708723573 | 0.0625084263716914 | T | T | T |
| 0.5090622123665552 | 0.5437286156475950 | 0.2920107616242338 | T | T | T |
| 0.5112310117593070 | 0.3665138022672350 | 0.2784988743570462 | T | T | T |
| 0.4333617871037121 | 0.7522553597344487 | 0.6436255885121357 | T | T | T |
| 0.1840993867996240 | 0.7454787462797448 | 0.6182926306213148 | T | T | T |
| 0.2761095627025776 | 0.7512555327047238 | 0.0139131315721495 | T | T | T |
| 0.1021758433379413 | 0.7509705206762985 | 0.0434846659767522 | T | T | T |
| 0.0664505916217108 | 0.2528330407717418 | 0.1287009822893557 | T | T | T |
| 0.3123892783352141 | 0.2513118438566905 | 0.1287982965977918 | T | T | T |
| 0.2230009879967444 | 0.2504456943075835 | 0.5008457353243894 | T | T | T |
| 0.3924489753773174 | 0.2512962818864042 | 0.5435633535976860 | T | T | T |
| 0.5560015333846253 | 0.2503690365016022 | 0.3517770048985662 | T | T | T |
| 0.8090982346644949 | 0.2515375039762069 | 0.3389285143268707 | T | T | T |
| 0.7260663919840413 | 0.2508722989183138 | 0.9414265632717482 | T | T | T |
| 0.8932475688791296 | 0.2511148137792081 | 0.9430630772474530 | T | T | T |
| 0.9445307781516331 | 0.7527254965164695 | 0.8561729160208961 | T | T | T |
| 0.6854366097131985 | 0.7508898284460419 | 0.8458608645666499 | T | T | T |
| 0.7698386354523771 | 0.7503588001479831 | 0.4279376265211803 | T | T | T |
| 0.6098194818310225 | 0.7528223059465557 | 0.4519178152279769 | T | T | T |
| 0.9420711842824515 | 0.4739706795801577 | 0.5190879090164109 | T | T | T |
| 0.9639347549769633 | 0.7290397516115614 | 0.5762513500427134 | T | T | T |
| 0.9274156567444950 | 0.3862734121681886 | 0.4462554014388959 | T | T | T |
| 0.9027649672876055 | 0.5574194527453854 | 0.5643141789416818 | T | T | T |
| 0.8738560138851039 | 0.7431152223276484 | 0.6043332662854738 | T | T | T |
| 0.0364619926362224 | 0.7574674030046999 | 0.6451874190673524 | T | T | T |
| 0.9877124035181132 | 0.4707249287912466 | 0.5442123059317739 | T | T | T |
| 0.9425518571051178 | 0.6271730872958826 | 0.5610660132020553 | T | T | T |
| 0.0536035278061373 | 0.3737287886826403 | 0.4562405016359924 | T | T | T |
| 0.0160660713559711 | 0.3432755167796484 | 0.5711502633154011 | T | T | T |
| 0.0136272855058397 | 0.2919430396092320 | 0.4582889387602254 | T | T | T |
| 0.0137554065399465 | 0.3429644701507766 | 0.4892844795110726 | T | T | T |

**Figure S11(c)**

Si Al O Zn H C

1.0000000000000000

20.0219999999999985 0.0000000000000000 0.0000000000000000

0.0000000000000000 19.8990000000000009 0.0000000000000000

0.0000000000000000 0.0000000000000000 13.3829999999999991

92 4 194 4 5 1

Selective dynamics

Direct

0.4222757230660297 0.0608810927790594 0.6490161140636577 T T T

0.3036494706797880 0.0337119849426710 0.7919173470167010 T T T

0.2831238908022459 0.0561307424073906 0.0178281981953883 T T T

**Structure files (CONTCAR) involved in this work:**

|                    |                    |                    |   |   |   |
|--------------------|--------------------|--------------------|---|---|---|
| 0.1233808373826584 | 0.0632284689254410 | 0.0120145713813207 | T | T | T |
| 0.0687480105072962 | 0.0318110097764809 | 0.7964532736595711 | T | T | T |
| 0.1812112996422737 | 0.0698641912888415 | 0.6628757911900737 | T | T | T |
| 0.4146678559492542 | 0.8292516114503795 | 0.6697090393382796 | T | T | T |
| 0.2968157586001396 | 0.8746558253118059 | 0.8034563076883414 | T | T | T |
| 0.2682476730294914 | 0.8315944963120762 | 0.0193439850848068 | T | T | T |
| 0.1120681776513772 | 0.8280631780767304 | 0.0109169566768144 | T | T | T |
| 0.0625322723940161 | 0.8745036270801092 | 0.7967183468060267 | T | T | T |
| 0.0771218615998308 | 0.9418468338404440 | 0.1489964394173545 | T | T | T |
| 0.1963773474334412 | 0.9742665044240072 | 0.2866355384998247 | T | T | T |
| 0.2173751226253944 | 0.9491594413685491 | 0.5126970147418514 | T | T | T |
| 0.3773525214753879 | 0.9374869602677457 | 0.5119878677066310 | T | T | T |
| 0.4349616911256587 | 0.9686220783088297 | 0.3001000508028163 | T | T | T |
| 0.3213427602477943 | 0.9354647689160261 | 0.1642417488159598 | T | T | T |
| 0.0834664004398352 | 0.1756562394314551 | 0.1627514906081649 | T | T | T |
| 0.1996236735553600 | 0.1308676753477133 | 0.2966221742839287 | T | T | T |
| 0.2314926820987295 | 0.1695893516405741 | 0.5132244206713082 | T | T | T |
| 0.3869902641541699 | 0.1734507452655125 | 0.5074114454730820 | T | T | T |
| 0.4361043511496822 | 0.1264586373837731 | 0.2942449630817325 | T | T | T |
| 0.3208364744245957 | 0.1732783185919796 | 0.1656872507261217 | T | T | T |
| 0.5768952746781554 | 0.5542771030255473 | 0.3585870979111920 | T | T | T |
| 0.6888624970773897 | 0.5258849226922941 | 0.2002740934202462 | T | T | T |
| 0.7117103545054286 | 0.5696026352975891 | 0.9882223876697971 | T | T | T |
| 0.8715920845791693 | 0.5708802241423101 | 0.9839775528834656 | T | T | T |
| 0.8113880057232608 | 0.5506514626347114 | 0.3351243484087123 | T | T | T |
| 0.5728866514752831 | 0.3279381274499524 | 0.3309587077867457 | T | T | T |
| 0.6939689534777687 | 0.3718851746857052 | 0.1925068632130827 | T | T | T |
| 0.7308968093198304 | 0.3275875216956589 | 0.9790503769964010 | T | T | T |
| 0.8853902267546970 | 0.3265328252866800 | 0.9943735029599018 | T | T | T |
| 0.9409063269629159 | 0.3779706127516058 | 0.1917433628675878 | T | T | T |
| 0.9198632971115146 | 0.4429435341015218 | 0.8585739445198516 | T | T | T |
| 0.8025254985160799 | 0.4701674914820035 | 0.7203185515953864 | T | T | T |
| 0.7751917867503618 | 0.4359702608987077 | 0.4911320414953764 | T | T | T |
| 0.6162304006408681 | 0.4269593439765491 | 0.4911606787399302 | T | T | T |
| 0.5668493278260697 | 0.4688167699993545 | 0.7020520275574943 | T | T | T |
| 0.6756976925320783 | 0.4484920385063322 | 0.8551162818183508 | T | T | T |
| 0.9180326877335384 | 0.6774755279315268 | 0.8273030664468164 | T | T | T |
| 0.7756797463278468 | 0.6661941819678489 | 0.4673077667982191 | T | T | T |
| 0.6157463308891051 | 0.6756230062177278 | 0.4879222165957411 | T | T | T |
| 0.5613294170621608 | 0.6278299330592557 | 0.6974862100636003 | T | T | T |
| 0.6751581420542528 | 0.6729152261900271 | 0.8244792579633118 | T | T | T |
| 0.5795796290805290 | 0.9469343421778778 | 0.3568665479694280 | T | T | T |
| 0.7000554543707338 | 0.9750879634343567 | 0.2117704470157594 | T | T | T |
| 0.7197667268173107 | 0.9347412821324145 | 0.9920196495281116 | T | T | T |
| 0.8800204711305438 | 0.9332471821493618 | 0.9986459095746826 | T | T | T |
| 0.9334082458845218 | 0.9737509035915667 | 0.2052865831927810 | T | T | T |
| 0.8229100241177986 | 0.9498981664357413 | 0.3524479581498975 | T | T | T |
| 0.5779456401955312 | 0.1726555242763284 | 0.3304705055864778 | T | T | T |
| 0.6991830495212054 | 0.1320397449019476 | 0.1938656724980104 | T | T | T |
| 0.7326949819227446 | 0.1727059397166243 | 0.9738627910112684 | T | T | T |
| 0.8874171491476144 | 0.1742671048379026 | 0.9874230397696275 | T | T | T |
| 0.9385079009728704 | 0.1301442579791028 | 0.1975474970591606 | T | T | T |
| 0.8224016158669842 | 0.1717267064889808 | 0.3303892775242590 | T | T | T |

**Structure files (CONTCAR) involved in this work:**

|                    |                    |                    |   |   |   |
|--------------------|--------------------|--------------------|---|---|---|
| 0.9238622967057999 | 0.0551947388573582 | 0.8591993252768136 | T | T | T |
| 0.8034412066537914 | 0.0300528573527582 | 0.7127984303645762 | T | T | T |
| 0.7809922312279084 | 0.0681748663770020 | 0.4932646892742910 | T | T | T |
| 0.6201821396896975 | 0.0712296512284265 | 0.4923219536008887 | T | T | T |
| 0.5669626232031194 | 0.0320690082825245 | 0.7012041945960384 | T | T | T |
| 0.6786202525482598 | 0.0534885301594043 | 0.8512362117761143 | T | T | T |
| 0.9220322514954643 | 0.8302385391618509 | 0.8461226739259787 | T | T | T |
| 0.8037593019231087 | 0.8731093611062313 | 0.7040272924184882 | T | T | T |
| 0.6120737775836284 | 0.8270236350135268 | 0.4906616815053371 | T | T | T |
| 0.5590823907649838 | 0.8746882933727126 | 0.6978031942456193 | T | T | T |
| 0.6772359938579207 | 0.8329535936669912 | 0.8282265073835330 | T | T | T |
| 0.4216475666069114 | 0.4416297444560007 | 0.6457044997557647 | T | T | T |
| 0.3026651226246574 | 0.4676151761832640 | 0.7881220618585710 | T | T | T |
| 0.2807663307638979 | 0.4462026204627902 | 0.0141949081951526 | T | T | T |
| 0.1228894259920541 | 0.4401837284086942 | 0.0128077761939888 | T | T | T |
| 0.0645222919472222 | 0.4677794894464020 | 0.7978823768420187 | T | T | T |
| 0.1774331394514730 | 0.4296729621905829 | 0.6630061680744535 | T | T | T |
| 0.4146161502083915 | 0.6746939647090301 | 0.6660717250499997 | T | T | T |
| 0.2969378144538901 | 0.6267737727870776 | 0.7979291933813421 | T | T | T |
| 0.2669044745632296 | 0.6700630220111312 | 0.0173618958846972 | T | T | T |
| 0.1114224226364986 | 0.6726695567281453 | 0.0098318106274934 | T | T | T |
| 0.0617333221984794 | 0.6266791008586740 | 0.7945254600388283 | T | T | T |
| 0.1766303228938589 | 0.6704393490711035 | 0.6608472659348423 | T | T | T |
| 0.0728983189894396 | 0.5604387435279765 | 0.1499468930045188 | T | T | T |
| 0.1931203245515322 | 0.5298706189372361 | 0.2874441986992572 | T | T | T |
| 0.2132116621494932 | 0.5507093917400953 | 0.5165762938246266 | T | T | T |
| 0.3730891201961489 | 0.5657863318930156 | 0.5149091346620037 | T | T | T |
| 0.4296583691296467 | 0.5325428540457169 | 0.3037491544054849 | T | T | T |
| 0.3199002215751045 | 0.5652661184299416 | 0.1614794203258909 | T | T | T |
| 0.0854848510516421 | 0.3281713897013911 | 0.1610141790486023 | T | T | T |
| 0.1979780658369391 | 0.3723491368546245 | 0.2987775334340253 | T | T | T |
| 0.2304659414153548 | 0.3307288016226781 | 0.5147764898355471 | T | T | T |
| 0.3851496689576797 | 0.3280477475034015 | 0.5055074234093690 | T | T | T |
| 0.4314746726692156 | 0.3747968594744574 | 0.2925920437381185 | T | T | T |
| 0.3171448945649834 | 0.3298219918771610 | 0.1621213527748263 | T | T | T |
| 0.9275414548941193 | 0.5317160222114330 | 0.1902164247861135 | T | T | T |
| 0.8221694987635335 | 0.3355150384419464 | 0.3262378014910130 | T | T | T |
| 0.8015751646872513 | 0.6292142845155066 | 0.6954755780848685 | T | T | T |
| 0.1812665613798378 | 0.8287399778612979 | 0.6605113124730962 | T | T | T |
| 0.7724922200163686 | 0.8284217874947561 | 0.4777246034108804 | T | T | T |
| 0.0044196121039592 | 0.5522367655325912 | 0.2140525578878084 | T | T | T |
| 0.3583445224463633 | 0.0711677403564310 | 0.7218596135959884 | T | T | T |
| 0.3157047696083937 | 0.0560114528706913 | 0.9070395017871318 | T | T | T |
| 0.2026035864125260 | 0.0474649055228731 | 0.0113737790117573 | T | T | T |
| 0.0955345330166238 | 0.0658390375764869 | 0.8986196623510279 | T | T | T |
| 0.1038138647547249 | 0.0675184483842378 | 0.7010341259307989 | T | T | T |
| 0.2289363262143944 | 0.0578115627841444 | 0.7598274435354111 | T | T | T |
| 0.3545831694164771 | 0.8295209963047316 | 0.7503884275618091 | T | T | T |
| 0.3048557818915955 | 0.8645603201659899 | 0.9236276254547525 | T | T | T |
| 0.1892807445443839 | 0.8518221864364892 | 0.0186775616446790 | T | T | T |
| 0.0857136704919737 | 0.8361544674514935 | 0.8967880232904892 | T | T | T |
| 0.0922204327122280 | 0.8318517096059700 | 0.6992496117074426 | T | T | T |
| 0.2238338597226610 | 0.8516673019664150 | 0.7673272784357390 | T | T | T |

**Structure files (CONTCAR) involved in this work:**

|                    |                    |                    |   |   |   |
|--------------------|--------------------|--------------------|---|---|---|
| 0.3118531509773496 | 0.9533077591936662 | 0.7766724495262388 | T | T | T |
| 0.0875266661592245 | 0.9515025717002191 | 0.7943569616901450 | T | T | T |
| 0.4322870023715801 | 0.1285267258012443 | 0.5822572304608528 | T | T | T |
| 0.4133201774354183 | 0.9974249818977585 | 0.5743436029466004 | T | T | T |
| 0.3913517498057739 | 0.8664333608295178 | 0.5675872827660360 | T | T | T |
| 0.1952523629492081 | 0.1437399000281310 | 0.6146605370568629 | T | T | T |
| 0.1940557261170492 | 0.0133609788431500 | 0.5793168005368955 | T | T | T |
| 0.1919964309786863 | 0.8802695989781762 | 0.5597380775549005 | T | T | T |
| 0.9883463918690574 | 0.0412062902099039 | 0.7883965845416934 | T | T | T |
| 0.9812610400071577 | 0.8700561874201296 | 0.7856452369745527 | T | T | T |
| 0.1425340091330068 | 0.9333461664556055 | 0.2191623598921205 | T | T | T |
| 0.1834311517419870 | 0.9591073280201977 | 0.4029512629087302 | T | T | T |
| 0.2984000382053273 | 0.9525147287542659 | 0.5020587604888128 | T | T | T |
| 0.4109979930305446 | 0.9323147031871294 | 0.4022947444463594 | T | T | T |
| 0.3977347278649895 | 0.9342925428933774 | 0.2048517185942752 | T | T | T |
| 0.2717839522297408 | 0.9514741691453539 | 0.2577372208327056 | T | T | T |
| 0.1428927791767936 | 0.1775858438438375 | 0.2451331304294674 | T | T | T |
| 0.1943055612364953 | 0.1365217834558952 | 0.4170226240692123 | T | T | T |
| 0.3097937648762376 | 0.1476628664572025 | 0.5126642542115322 | T | T | T |
| 0.4145312101911200 | 0.1675602624965280 | 0.3940520307608600 | T | T | T |
| 0.3980230672918892 | 0.1597257925648656 | 0.1984458138174659 | T | T | T |
| 0.2733756639689796 | 0.1562781869087562 | 0.2617537053180503 | T | T | T |
| 0.1867576625429287 | 0.0539322925324763 | 0.2609987472790626 | T | T | T |
| 0.4150630683949698 | 0.0480607516276982 | 0.3051856183365631 | T | T | T |
| 0.0664222883556014 | 0.8732154889747277 | 0.0848199882810690 | T | T | T |
| 0.0843482894245705 | 0.0041778864516989 | 0.0714523374290222 | T | T | T |
| 0.1073388174592283 | 0.1353417639448773 | 0.0634978282278040 | T | T | T |
| 0.3033858847606293 | 0.8618250989137837 | 0.1188968290768653 | T | T | T |
| 0.3139499504168677 | 0.9936168171424780 | 0.0798750884198356 | T | T | T |
| 0.3009636969699910 | 0.1273470185991927 | 0.0704558002829563 | T | T | T |
| 0.5149334746433938 | 0.9589175579407136 | 0.2854250648281482 | T | T | T |
| 0.5164671656393991 | 0.1320959512084069 | 0.2778852035101813 | T | T | T |
| 0.6395981432721614 | 0.5575151929485181 | 0.2830785404053767 | T | T | T |
| 0.6893134599662375 | 0.5755684086470056 | 0.1043037370030040 | T | T | T |
| 0.7919404507943957 | 0.5570950245822718 | 0.9778031715142342 | T | T | T |
| 0.8954305660703957 | 0.5764695687253735 | 0.1002635202865041 | T | T | T |
| 0.8874302751392674 | 0.5408051725600149 | 0.2955650830595999 | T | T | T |
| 0.7639818866704939 | 0.5252485635968056 | 0.2465286645168454 | T | T | T |
| 0.6394574495106662 | 0.3353510965098465 | 0.2641510744168590 | T | T | T |
| 0.6927089653689750 | 0.3328901624239368 | 0.0853422259652985 | T | T | T |
| 0.8083762466657693 | 0.3522730780146023 | 0.9907803880950540 | T | T | T |
| 0.9104902684514079 | 0.3256967447208363 | 0.1104944135288577 | T | T | T |
| 0.9061515075496234 | 0.3654280559475750 | 0.3011066960346044 | T | T | T |
| 0.7667093446113057 | 0.3703257445859070 | 0.2427299118502714 | T | T | T |
| 0.6690339423644289 | 0.4493589368536784 | 0.1719763095763646 | T | T | T |
| 0.9244031541904114 | 0.4537737140257740 | 0.1539420493138207 | T | T | T |
| 0.5731817097676731 | 0.6248364098364310 | 0.4180600568652170 | T | T | T |
| 0.5859780217592262 | 0.4939943398972366 | 0.4393708262827010 | T | T | T |
| 0.5839170489750254 | 0.3603569890412853 | 0.4418099925327264 | T | T | T |
| 0.7997727695022369 | 0.6290680345294548 | 0.3649328707697662 | T | T | T |
| 0.7966556642548585 | 0.5089536849840754 | 0.4400226574782052 | T | T | T |
| 0.8224520669835054 | 0.3786704342125887 | 0.4432153881064890 | T | T | T |
| 0.0207229519391277 | 0.3679920717223711 | 0.2045655747831941 | T | T | T |

**Structure files (CONTCAR) involved in this work:**

|                    |                    |                    |   |   |   |
|--------------------|--------------------|--------------------|---|---|---|
| 0.8554624700421590 | 0.4275214396666463 | 0.7866835863164464 | T | T | T |
| 0.7943877804075550 | 0.4384829027106797 | 0.6090141642919679 | T | T | T |
| 0.6968146053239067 | 0.4240440741887052 | 0.4728871624346003 | T | T | T |
| 0.6003705377277890 | 0.4277353638496688 | 0.6094314078894686 | T | T | T |
| 0.6025802922094524 | 0.4440055080596810 | 0.8042594213223726 | T | T | T |
| 0.7300876379608733 | 0.4738970332828139 | 0.7720003990672464 | T | T | T |
| 0.8608758903317318 | 0.6840415575658825 | 0.7428017983801537 | T | T | T |
| 0.8158148408250927 | 0.6303641286122624 | 0.5621759730800223 | T | T | T |
| 0.6958384386220343 | 0.6579250374906066 | 0.4828122352545101 | T | T | T |
| 0.5904371798312125 | 0.6686488909804725 | 0.6020626004608012 | T | T | T |
| 0.5968351746069189 | 0.6579832389904712 | 0.7973307466452846 | T | T | T |
| 0.7223865917985669 | 0.6423864956825459 | 0.7375356777860160 | T | T | T |
| 0.8342339570276187 | 0.5456317583470174 | 0.7031915587630595 | T | T | T |
| 0.5788937627379029 | 0.5485168196248276 | 0.6839117988666226 | T | T | T |
| 0.9318186935727346 | 0.3777390852953567 | 0.9295137488497879 | T | T | T |
| 0.9095104781329227 | 0.5092565690222177 | 0.9276649567972078 | T | T | T |
| 0.8902176930010341 | 0.6409283410812883 | 0.9281583759721860 | T | T | T |
| 0.6952684130618008 | 0.3747329206971936 | 0.8959304212244698 | T | T | T |
| 0.6736209839403315 | 0.5040969541620265 | 0.9433035736641250 | T | T | T |
| 0.6911362215698238 | 0.6384388658303312 | 0.9324920614441821 | T | T | T |
| 0.4880895185255942 | 0.4515876887893803 | 0.7133172449857433 | T | T | T |
| 0.4809454088418700 | 0.6364390697780276 | 0.7074903007214797 | T | T | T |
| 0.6459940946626511 | 0.9428968244097167 | 0.2878564035706564 | T | T | T |
| 0.7000971784688068 | 0.9308017383297787 | 0.1093361999376622 | T | T | T |
| 0.8005393489176192 | 0.9399725037208271 | 0.9778644415089358 | T | T | T |
| 0.8971080567425925 | 0.9311798947254626 | 0.1165553372144197 | T | T | T |
| 0.8993325900987872 | 0.9585420853938382 | 0.3121488618291514 | T | T | T |
| 0.7737190121501796 | 0.9735995269490129 | 0.2615670157826313 | T | T | T |
| 0.6426823653178247 | 0.1710009740769176 | 0.2582811947667177 | T | T | T |
| 0.6980167773768753 | 0.1637502228157544 | 0.0822576418013544 | T | T | T |
| 0.8104365464486692 | 0.1481298233927363 | 0.9804822841592430 | T | T | T |
| 0.9128873849234185 | 0.1736275727828221 | 0.1022025774570905 | T | T | T |
| 0.8989966385076040 | 0.1525728240738315 | 0.2976218973675741 | T | T | T |
| 0.7722778034620661 | 0.1418166848054808 | 0.2442396301824939 | T | T | T |
| 0.6805606834063429 | 0.0526539274899850 | 0.1871069154394940 | T | T | T |
| 0.9254295872983664 | 0.0517678773027810 | 0.1726236928360572 | T | T | T |
| 0.5706676466341926 | 0.8767037387156805 | 0.4167024126939270 | T | T | T |
| 0.5841760220088991 | 0.0080109117501806 | 0.4376217991091400 | T | T | T |
| 0.5962545763008223 | 0.1405892121460223 | 0.4389134901783677 | T | T | T |
| 0.8107102795438770 | 0.8737014493253034 | 0.3856649505925299 | T | T | T |
| 0.8136309102122441 | 1.0001966173369417 | 0.4478290005756509 | T | T | T |
| 0.8071206926332292 | 0.1352364069026598 | 0.4370872520112843 | T | T | T |
| 0.0115663807625872 | 0.9535930109853041 | 0.2175070517968689 | T | T | T |
| 0.0181047898221937 | 0.1421112973140509 | 0.2144020217876062 | T | T | T |
| 0.8582769890809113 | 0.0610492946330174 | 0.7888326311903565 | T | T | T |
| 0.8030986578903623 | 0.0732667804877323 | 0.6102799604881348 | T | T | T |
| 0.7003680878636414 | 0.0628377557765015 | 0.4827621135965260 | T | T | T |
| 0.5986682493561368 | 0.0750668692788961 | 0.6091367594648528 | T | T | T |
| 0.6036478469128573 | 0.0511313024756523 | 0.8058081127717839 | T | T | T |
| 0.7298670745407183 | 0.0320705683071326 | 0.7626372228525103 | T | T | T |
| 0.8546287207031285 | 0.8357432969358894 | 0.7801262928454004 | T | T | T |
| 0.8168414760312033 | 0.8359382326779666 | 0.5959790475820071 | T | T | T |
| 0.6900366177984378 | 0.8452981954141974 | 0.4959213865950719 | T | T | T |

**Structure files (CONTCAR) involved in this work:**

|                    |                    |                    |   |   |   |
|--------------------|--------------------|--------------------|---|---|---|
| 0.5792572429506385 | 0.8293711927340315 | 0.6019820455890528 | T | T | T |
| 0.6009505279780797 | 0.8501564593716642 | 0.7958287606272759 | T | T | T |
| 0.7277145175790636 | 0.8627971147652024 | 0.7421211077532524 | T | T | T |
| 0.8220968756941825 | 0.9516307852099702 | 0.6906488682920341 | T | T | T |
| 0.5766830244601951 | 0.9528860311843181 | 0.6751639129583777 | T | T | T |
| 0.9338768881084207 | 0.1262143697717645 | 0.9179811556521124 | T | T | T |
| 0.9172766037843954 | 0.9947736108110180 | 0.9408496556464385 | T | T | T |
| 0.9088879120920494 | 0.8622390151393666 | 0.9551364012398823 | T | T | T |
| 0.6940615052454882 | 0.1291302101655053 | 0.8896877622185178 | T | T | T |
| 0.6854286621740625 | 0.0014509693702817 | 0.9442224138208215 | T | T | T |
| 0.6936459687662803 | 0.8673124877230245 | 0.9357204928627890 | T | T | T |
| 0.4885601554564626 | 0.0499104557730593 | 0.7167748658658013 | T | T | T |
| 0.4797131133693539 | 0.8655882108630839 | 0.7196464415340382 | T | T | T |
| 0.3578387430225349 | 0.4302974718073383 | 0.7188358941042110 | T | T | T |
| 0.3140413699202609 | 0.4461094639139269 | 0.9036406717164043 | T | T | T |
| 0.2010064854271549 | 0.4611630277174233 | 0.0061861340886602 | T | T | T |
| 0.0908378644572235 | 0.4362905418797584 | 0.9021062846184796 | T | T | T |
| 0.1010667175776874 | 0.4303607900212208 | 0.7049406459776060 | T | T | T |
| 0.2277650053403175 | 0.4444535925749654 | 0.7558662278284605 | T | T | T |
| 0.3560545834300608 | 0.6717803952572362 | 0.7500318273786372 | T | T | T |
| 0.2989538266643050 | 0.6375023546774670 | 0.9174001561931604 | T | T | T |
| 0.1884263186604408 | 0.6484434696983715 | 0.0216569526075754 | T | T | T |
| 0.0875714401608983 | 0.6636162347021134 | 0.8948471562509097 | T | T | T |
| 0.0968053002192406 | 0.6661385863744067 | 0.6993311478834061 | T | T | T |
| 0.2236250296558416 | 0.6485459222007419 | 0.7553133522279635 | T | T | T |
| 0.3105268793541126 | 0.5481776449750969 | 0.7717158106896473 | T | T | T |
| 0.0819696528333321 | 0.5479015608843099 | 0.7937857332864338 | T | T | T |
| 0.4317412870861573 | 0.3759296493951579 | 0.5749235834682788 | T | T | T |
| 0.4127609322492502 | 0.5074443716739029 | 0.5753329990991303 | T | T | T |
| 0.3869686034946374 | 0.6384641364290432 | 0.5652991441294151 | T | T | T |
| 0.1924201667229090 | 0.3560631129241981 | 0.6153069910381421 | T | T | T |
| 0.1852864484758514 | 0.4860817493919743 | 0.5768071786150160 | T | T | T |
| 0.1864261084593443 | 0.6187542506911723 | 0.5687196006234854 | T | T | T |
| 0.9845969132479276 | 0.4548612569330168 | 0.7872279263120392 | T | T | T |
| 0.9814681838557333 | 0.6348398865644902 | 0.7830647832598587 | T | T | T |
| 0.1360897203900454 | 0.5694204943654192 | 0.2244283442152947 | T | T | T |
| 0.1835893341810946 | 0.5477683470767423 | 0.4041695677136119 | T | T | T |
| 0.2940476629904112 | 0.5482791076830518 | 0.5150427931830596 | T | T | T |
| 0.4011499001076234 | 0.5702290898665793 | 0.4020051510954977 | T | T | T |
| 0.3953223678883130 | 0.5655267826909403 | 0.2054744380410589 | T | T | T |
| 0.2674193849096445 | 0.5521988483217637 | 0.2524885159399689 | T | T | T |
| 0.1401689835341161 | 0.3257911580163369 | 0.2502015173198318 | T | T | T |
| 0.1942777828598387 | 0.3657746376176865 | 0.4191432516990992 | T | T | T |
| 0.3082578091620793 | 0.3541948598083781 | 0.5166367455384071 | T | T | T |
| 0.4082716020334236 | 0.3313788036461663 | 0.3894299574286333 | T | T | T |
| 0.3938907572797319 | 0.3471244117075277 | 0.1928509906104970 | T | T | T |
| 0.2707150632591502 | 0.3479524113520519 | 0.2590483504706630 | T | T | T |
| 0.1835699797689805 | 0.4497624792018550 | 0.2663166557878748 | T | T | T |
| 0.4117210749166669 | 0.4529597536232712 | 0.3113231405235098 | T | T | T |
| 0.0644515153752678 | 0.6272754059758111 | 0.0815605010109061 | T | T | T |
| 0.0820174860949085 | 0.4955419646732819 | 0.0775125948844614 | T | T | T |
| 0.1152772640548096 | 0.3665388591699004 | 0.0636246774487631 | T | T | T |
| 0.3053961483207572 | 0.6384035887354845 | 0.1128320913193588 | T | T | T |

**Structure files (CONTCAR) involved in this work:**

|                    |                    |                    |   |   |   |
|--------------------|--------------------|--------------------|---|---|---|
| 0.3146035422101414 | 0.5058136919524775 | 0.0788942185880709 | T | T | T |
| 0.2939227041085067 | 0.3735064078294791 | 0.0656669633607019 | T | T | T |
| 0.5096054717907579 | 0.5430863025895362 | 0.2938772713184379 | T | T | T |
| 0.5114164004035450 | 0.3667063574867870 | 0.2754864927738201 | T | T | T |
| 0.4326020417102423 | 0.7519717944420123 | 0.6408720691239147 | T | T | T |
| 0.1874366752606286 | 0.7455677744869065 | 0.6237777673719702 | T | T | T |
| 0.2756598953164224 | 0.7505453906171577 | 0.0189217017636135 | T | T | T |
| 0.1033364936384700 | 0.7502142795375801 | 0.0432148751380123 | T | T | T |
| 0.0660972707104503 | 0.2522558865029781 | 0.1288950558786986 | T | T | T |
| 0.3103954266360314 | 0.2511699523636111 | 0.1327487605398535 | T | T | T |
| 0.2243763194276372 | 0.2503748915648337 | 0.5070384628821735 | T | T | T |
| 0.3917243613102072 | 0.2511702306541185 | 0.5437787334455824 | T | T | T |
| 0.5545251608101647 | 0.2497164772036389 | 0.3476442985532779 | T | T | T |
| 0.8151179652675283 | 0.2510422254610662 | 0.3422575581890072 | T | T | T |
| 0.7284750113485697 | 0.2507648776216268 | 0.9390655926610789 | T | T | T |
| 0.8927503218748312 | 0.2515587341842366 | 0.9478675680409707 | T | T | T |
| 0.9448433439484187 | 0.7522962068807184 | 0.8574755081638387 | T | T | T |
| 0.6878041895070145 | 0.7528795523344215 | 0.8384221071537177 | T | T | T |
| 0.8010337121443201 | 0.7435599456262434 | 0.4680712935084331 | T | T | T |
| 0.6023841420581416 | 0.7507993408077701 | 0.4474222086197299 | T | T | T |
| 0.9400840472664070 | 0.4982606691822339 | 0.4937634009328292 | T | T | T |
| 0.9666597246286481 | 0.7312052633077497 | 0.5729471030249865 | T | T | T |
| 0.9265403566366750 | 0.4137454362194609 | 0.4373024115709548 | T | T | T |
| 0.8796695034303531 | 0.5495299992957463 | 0.5617213490426803 | T | T | T |
| 0.8828446098276792 | 0.7642380106887341 | 0.5756320443014979 | T | T | T |
| 0.0353215025045205 | 0.7658069157281350 | 0.6405250943785060 | T | T | T |
| 0.0248418354041899 | 0.5905989267402525 | 0.4697797355614989 | T | T | T |
| 0.0263221877032915 | 0.6282794960439501 | 0.4764778691568116 | T | T | T |
| 0.0490287727245238 | 0.3907246738086373 | 0.4612898430559312 | T | T | T |
| 1.0040249762248510 | 0.3632327417705440 | 0.5733480246976527 | T | T | T |
| 1.0005951127837605 | 0.3116835783345944 | 0.4579681095675276 | T | T | T |
| 1.0076045050551665 | 0.3612662541667891 | 0.4919473775367549 | T | T | T |

**Figure S11(d) TS1**

Si Al O Zn H C

1.0000000000000000

20.0219999999999985 0.0000000000000000 0.0000000000000000

0.0000000000000000 19.8990000000000009 0.0000000000000000

0.0000000000000000 0.0000000000000000 13.3829999999999991

92 4 194 4 5 1

Selective dynamics

Direct

0.4232584593288608 0.0605073829887106 0.6497099664301753 T T T

0.3038792322014952 0.0323829469258136 0.7913411194849924 T T T

0.2835572167459676 0.0559200199622134 0.0174852190063241 T T T

0.1238348901929515 0.0649529985543235 0.0128686213922932 T T T

0.0687825522064813 0.0332737970643994 0.7993044762133134 T T T

0.1809979505043519 0.0685508820040364 0.6632610776266576 T T T

0.4148996795718936 0.8293150191442195 0.6682238455576952 T T T

0.2977981842124934 0.8730863105498730 0.8028002122853805 T T T

0.2681773589422623 0.8320540599656917 0.0189766652335264 T T T

0.1120703629210484 0.8286834840096381 0.0092536473723230 T T T

0.0613201352186862 0.8760168787806510 0.7973933908638596 T T T

0.0768656385021641 0.9428300476149687 0.1476635378096931 T T T



**Structure files (CONTCAR) involved in this work:**

|                    |                    |                    |   |   |   |
|--------------------|--------------------|--------------------|---|---|---|
| 0.1960084980092915 | 0.9746256719693573 | 0.2864926391465996 | T | T | T |
| 0.2192267275500799 | 0.9492908353029108 | 0.5116239494247579 | T | T | T |
| 0.3779923983656830 | 0.9382405554409546 | 0.5120980511384738 | T | T | T |
| 0.4353118864687673 | 0.9687117555854985 | 0.3004104856875243 | T | T | T |
| 0.3213321570866479 | 0.9355231689676839 | 0.1646206111780655 | T | T | T |
| 0.0831493510625831 | 0.1767473242924601 | 0.1649282185961443 | T | T | T |
| 0.1995775763717887 | 0.1314775255775730 | 0.2970576753248263 | T | T | T |
| 0.2314142019384058 | 0.1698592815582549 | 0.5145293228229331 | T | T | T |
| 0.3873099076770291 | 0.1735182541527315 | 0.5083214885952831 | T | T | T |
| 0.4357525521218129 | 0.1264871491710900 | 0.2947247249944300 | T | T | T |
| 0.3210337207222187 | 0.1734554191124897 | 0.1646889014667119 | T | T | T |
| 0.5756551277808589 | 0.5550336092264785 | 0.3577814215348676 | T | T | T |
| 0.6876035936759426 | 0.5265684702405848 | 0.2018275322759217 | T | T | T |
| 0.7099215903233996 | 0.5688052797393601 | 0.9886563756574969 | T | T | T |
| 0.8694472263181552 | 0.5700179788226329 | 0.9781974493583001 | T | T | T |
| 0.8120987918177007 | 0.5517014718963057 | 0.3318103828665585 | T | T | T |
| 0.5727920158095237 | 0.3280630485863573 | 0.3312466604889447 | T | T | T |
| 0.6929468429411475 | 0.3728365199581453 | 0.1942710119667773 | T | T | T |
| 0.7315614492499629 | 0.3287854482114435 | 0.9790624873308892 | T | T | T |
| 0.8858752781452598 | 0.3266930423927070 | 0.9917361016886509 | T | T | T |
| 0.9391842284666000 | 0.3782165885903397 | 0.1907809629900135 | T | T | T |
| 0.9189859481228757 | 0.4420881508131045 | 0.8545532515928161 | T | T | T |
| 0.8037097562705344 | 0.4736920752876563 | 0.7198364695008304 | T | T | T |
| 0.7792014486321895 | 0.4390454203628536 | 0.4902035731256104 | T | T | T |
| 0.6203751253573715 | 0.4287426109390766 | 0.4882826207721270 | T | T | T |
| 0.5697060497458006 | 0.4690590428152475 | 0.6988395363741333 | T | T | T |
| 0.6762235764091636 | 0.4486762147810286 | 0.8541548648105913 | T | T | T |
| 0.9159050003717648 | 0.6779312551324488 | 0.8218155482694651 | T | T | T |
| 0.7703707955589294 | 0.6648956637773468 | 0.4647013562465910 | T | T | T |
| 0.6117835089636378 | 0.6756852439677962 | 0.4848904843202310 | T | T | T |
| 0.5615375640098421 | 0.6280495092317206 | 0.6963470820752404 | T | T | T |
| 0.6741314125739836 | 0.6739094012658517 | 0.8266772898775329 | T | T | T |
| 0.5798961806753044 | 0.9477969828432335 | 0.3577268930807601 | T | T | T |
| 0.7009599402946275 | 0.9754421445252613 | 0.2135714660771035 | T | T | T |
| 0.7197850490218656 | 0.9352968499883271 | 0.9933330130729612 | T | T | T |
| 0.8797483426983213 | 0.9329520244460505 | 0.9997514309568233 | T | T | T |
| 0.9328095101141873 | 0.9748034258773485 | 0.2062275885141051 | T | T | T |
| 0.8238224202687944 | 0.9497112898773756 | 0.3556222414560533 | T | T | T |
| 0.5774573924776840 | 0.1731085821379929 | 0.3324816669704343 | T | T | T |
| 0.6989619805237641 | 0.1324761361927946 | 0.1954219288792922 | T | T | T |
| 0.7321667432899103 | 0.1735589257130390 | 0.9757101637693789 | T | T | T |
| 0.8867452008844623 | 0.1746274578214722 | 0.9880585286157333 | T | T | T |
| 0.9379404835121516 | 0.1316802074571427 | 0.1986683693016050 | T | T | T |
| 0.8216878670957845 | 0.1730920162510253 | 0.3316430525823697 | T | T | T |
| 0.9234562086347821 | 0.0549586831508453 | 0.8600625410876340 | T | T | T |
| 0.8028350681113468 | 0.0299010792952493 | 0.7128268832481356 | T | T | T |
| 0.7812582616550764 | 0.0689555111399836 | 0.4939023846953921 | T | T | T |
| 0.6205201372332221 | 0.0718529432210533 | 0.4933944009807071 | T | T | T |
| 0.5677935081480586 | 0.0326156402036747 | 0.7024101962890029 | T | T | T |
| 0.6788655893900326 | 0.0543407214358995 | 0.8530610577872707 | T | T | T |
| 0.9216661090904636 | 0.8309277427211390 | 0.8488201519543538 | T | T | T |
| 0.8025798580726113 | 0.8727707012882548 | 0.7060430245419148 | T | T | T |
| 0.6133601185392660 | 0.8274146812975411 | 0.4906070270322905 | T | T | T |

**Structure files (CONTCAR) involved in this work:**

|                    |                    |                    |   |   |   |
|--------------------|--------------------|--------------------|---|---|---|
| 0.5595086382556798 | 0.8753490341131932 | 0.6969577739373843 | T | T | T |
| 0.6755453755383064 | 0.8335873937918711 | 0.8305249635826039 | T | T | T |
| 0.4233039705225289 | 0.4426341767859346 | 0.6431505608223024 | T | T | T |
| 0.3037072505901044 | 0.4695351139538360 | 0.7865063223455402 | T | T | T |
| 0.2809361228465586 | 0.4463969020364451 | 0.0118163806255537 | T | T | T |
| 0.1234576597885319 | 0.4384608474451107 | 0.0113591063418040 | T | T | T |
| 0.0638355815693664 | 0.4658624621812285 | 0.8002924196137582 | T | T | T |
| 0.1779984359803739 | 0.4316010311579084 | 0.6629343018480874 | T | T | T |
| 0.4154098142859425 | 0.6750177809902732 | 0.6644699274760634 | T | T | T |
| 0.2969750514253542 | 0.6291599968152808 | 0.7951524867989298 | T | T | T |
| 0.2664845033357883 | 0.6705730507371108 | 0.0156950606399881 | T | T | T |
| 0.1111899664484605 | 0.6738736805200098 | 0.0082813051746454 | T | T | T |
| 0.0599035582242384 | 0.6245304627195343 | 0.7980644303770851 | T | T | T |
| 0.1741086074775898 | 0.6698280345339944 | 0.6585076701209774 | T | T | T |
| 0.0730135322084661 | 0.5601581267301191 | 0.1462865493430938 | T | T | T |
| 0.1925021081832765 | 0.5304460330671952 | 0.2862650672668932 | T | T | T |
| 0.2141809301491019 | 0.5519051527130788 | 0.5143088381326829 | T | T | T |
| 0.3737983520602937 | 0.5664242302603807 | 0.5125499019855475 | T | T | T |
| 0.4292657848809271 | 0.5318927805817494 | 0.3022814023855808 | T | T | T |
| 0.3190008781082878 | 0.5656560494921594 | 0.1610995321662005 | T | T | T |
| 0.0844631369835642 | 0.3292615752661905 | 0.1627750190221827 | T | T | T |
| 0.1977822530933709 | 0.3726936935544908 | 0.2979341692087027 | T | T | T |
| 0.2302820675431334 | 0.3309828154451585 | 0.5151932887072340 | T | T | T |
| 0.3851066747522687 | 0.3277126942848279 | 0.5056816300938005 | T | T | T |
| 0.4301755199083983 | 0.3746427022957959 | 0.2928373475895193 | T | T | T |
| 0.3170648800277076 | 0.3298955319982569 | 0.1594324749551859 | T | T | T |
| 0.9269506772774312 | 0.5326921984411530 | 0.1847102772062874 | T | T | T |
| 0.8217173410851667 | 0.3363209268766037 | 0.3273774186289953 | T | T | T |
| 0.7996208876608349 | 0.6278978772449607 | 0.6935050616698296 | T | T | T |
| 0.1789483268745126 | 0.8313966616281298 | 0.6603841392441993 | T | T | T |
| 0.7743426588374159 | 0.8262042074293412 | 0.4806153289288504 | T | T | T |
| 0.0043602425282374 | 0.5514184564126895 | 0.2090243364699790 | T | T | T |
| 0.3587438063750337 | 0.0698993705081274 | 0.7217345880928669 | T | T | T |
| 0.3160094476459394 | 0.0542780840604601 | 0.9065869532957299 | T | T | T |
| 0.2029199338228491 | 0.0481349337648687 | 0.0115859469858053 | T | T | T |
| 0.0960253852873620 | 0.0696163710811536 | 0.8994742461481406 | T | T | T |
| 0.1038305371600030 | 0.0665446270282667 | 0.7019655197185568 | T | T | T |
| 0.2292204075805136 | 0.0567593817461124 | 0.7596788987307914 | T | T | T |
| 0.3565452347814687 | 0.8283155587734693 | 0.7518132207265489 | T | T | T |
| 0.3051741708648105 | 0.8646693326385086 | 0.9232840801090757 | T | T | T |
| 0.1893043402187220 | 0.8525236452076758 | 0.0167273373232771 | T | T | T |
| 0.0857117851681724 | 0.8343791396586493 | 0.8945915737371746 | T | T | T |
| 0.0903902411820608 | 0.8379737500728797 | 0.6962066336751955 | T | T | T |
| 0.2256756540582707 | 0.8470666686106116 | 0.7657643544985970 | T | T | T |
| 0.3111253614619220 | 0.9518404185615041 | 0.7747496551121844 | T | T | T |
| 0.0870130736389601 | 0.9528172584442380 | 0.8023966343870735 | T | T | T |
| 0.4325052161299503 | 0.1279107322508477 | 0.5823052891313953 | T | T | T |
| 0.4156348505766589 | 0.9963124499599532 | 0.5759854341170394 | T | T | T |
| 0.3880903199792417 | 0.8663934573330144 | 0.5677107955467859 | T | T | T |
| 0.1950783017042625 | 0.1422177346433023 | 0.6147377699474909 | T | T | T |
| 0.1926658158541796 | 0.0108489360235056 | 0.5807985876947780 | T | T | T |
| 0.1987554191297810 | 0.8781829420235455 | 0.5578843085154199 | T | T | T |
| 0.9885261467055211 | 0.0423243123126396 | 0.7899991114170754 | T | T | T |

**Structure files (CONTCAR) involved in this work:**

|                    |                    |                    |   |   |   |
|--------------------|--------------------|--------------------|---|---|---|
| 0.9801104348623760 | 0.8712598353506789 | 0.7883312300952411 | T | T | T |
| 0.1419657518403180 | 0.9341437861306950 | 0.2186673271466467 | T | T | T |
| 0.1836116489678764 | 0.9584394157195242 | 0.4029198831531039 | T | T | T |
| 0.2998440826009149 | 0.9571180337608078 | 0.4998763153753525 | T | T | T |
| 0.4123069332608437 | 0.9321868493045536 | 0.4030266493229067 | T | T | T |
| 0.3975787469515679 | 0.9339209978757758 | 0.2058432105842696 | T | T | T |
| 0.2713761959192370 | 0.9517296983437908 | 0.2574849413221905 | T | T | T |
| 0.1422253402892121 | 0.1784799556121810 | 0.2479941117071143 | T | T | T |
| 0.1955350889125058 | 0.1366385304862412 | 0.4175804240906893 | T | T | T |
| 0.3098521934405012 | 0.1488228180180245 | 0.5150463949740294 | T | T | T |
| 0.4135833392361120 | 0.1673246729896783 | 0.3943999876112317 | T | T | T |
| 0.3979437576703948 | 0.1598936983420567 | 0.1988133485229721 | T | T | T |
| 0.2728505673949304 | 0.1568792884318256 | 0.2601138812399629 | T | T | T |
| 0.1864626625860908 | 0.0544163198213493 | 0.2619276185340056 | T | T | T |
| 0.4146678116051551 | 0.0479836603211036 | 0.3050747256400402 | T | T | T |
| 0.0666081359022371 | 0.8743768462092355 | 0.0825851295734674 | T | T | T |
| 0.0844497729938714 | 0.0051966221045371 | 0.0703317192301825 | T | T | T |
| 0.1083990857801061 | 0.1364366430927508 | 0.0663343776247895 | T | T | T |
| 0.3029787606076630 | 0.8619769712546141 | 0.1189304874635485 | T | T | T |
| 0.3142013234049601 | 0.9935275773421700 | 0.0800974351791903 | T | T | T |
| 0.3020527632516010 | 0.1271871616611843 | 0.0693144379454888 | T | T | T |
| 0.5152975059233480 | 0.9595777257762015 | 0.2857950437064613 | T | T | T |
| 0.5161484021884233 | 0.1323327324848808 | 0.2795393052150555 | T | T | T |
| 0.6391154211412838 | 0.5608223132565606 | 0.2837890610357558 | T | T | T |
| 0.6875593180508746 | 0.5751007201106343 | 0.1045744959014807 | T | T | T |
| 0.7900880902232068 | 0.5552389485015424 | 0.9791096878974942 | T | T | T |
| 0.8976349703299835 | 0.5776152261699761 | 0.0921330006794833 | T | T | T |
| 0.8879135919604687 | 0.5468562955634682 | 0.2894010385177641 | T | T | T |
| 0.7633354060421479 | 0.5248493475484216 | 0.2454884041918293 | T | T | T |
| 0.6374946457296491 | 0.3330776395628745 | 0.2603081358314335 | T | T | T |
| 0.6948360992537943 | 0.3354744437713637 | 0.0860750226091717 | T | T | T |
| 0.8091505512716273 | 0.3532221589190251 | 0.9882629708545434 | T | T | T |
| 0.9114971330153664 | 0.3260455828686783 | 0.1069943011697014 | T | T | T |
| 0.9047075683435841 | 0.3626489950680208 | 0.2978865481412837 | T | T | T |
| 0.7643577231252431 | 0.3725241262492036 | 0.2482063702908171 | T | T | T |
| 0.6658245373816137 | 0.4500047900990630 | 0.1766396093224334 | T | T | T |
| 0.9211922514375702 | 0.4541279518798383 | 0.1531117068541412 | T | T | T |
| 0.5666337638900371 | 0.6256856785980541 | 0.4166221119028657 | T | T | T |
| 0.5872621674449943 | 0.4953645970566602 | 0.4387814185140286 | T | T | T |
| 0.5875125381014693 | 0.3618151685457942 | 0.4401599495708355 | T | T | T |
| 0.7971041851371318 | 0.6292938116616905 | 0.3625798042627622 | T | T | T |
| 0.8045768555972794 | 0.5085120677905566 | 0.4354549940144330 | T | T | T |
| 0.8255408895463154 | 0.3781846084425609 | 0.4471415771029373 | T | T | T |
| 0.0197258111708068 | 0.3707997699509870 | 0.2015535521975837 | T | T | T |
| 0.8553866062704450 | 0.4264447091242722 | 0.7824702056264411 | T | T | T |
| 0.7936797615087262 | 0.4436777417549230 | 0.6083890715098162 | T | T | T |
| 0.7006657565192778 | 0.4277153230759471 | 0.4670826932132904 | T | T | T |
| 0.6055000709309986 | 0.4291973424901888 | 0.6070577361309771 | T | T | T |
| 0.6035178928160608 | 0.4435564306670303 | 0.8018476837740246 | T | T | T |
| 0.7310934852871471 | 0.4748560580139856 | 0.7731332810807949 | T | T | T |
| 0.8623673781679411 | 0.6877805988779083 | 0.7292591060715147 | T | T | T |
| 0.8071579522490522 | 0.6271140559842703 | 0.5606119170660102 | T | T | T |
| 0.6904467404274234 | 0.6544426803794847 | 0.4754201928073435 | T | T | T |

**Structure files (CONTCAR) involved in this work:**

|                    |                    |                    |   |   |   |
|--------------------|--------------------|--------------------|---|---|---|
| 0.5886343192368825 | 0.6695042054915860 | 0.6003545733354481 | T | T | T |
| 0.5963147634554129 | 0.6588201478686116 | 0.7963507895766719 | T | T | T |
| 0.7228524973257787 | 0.6459715921261175 | 0.7402282961616942 | T | T | T |
| 0.8354669854705327 | 0.5488820263048236 | 0.7133435755834716 | T | T | T |
| 0.5806282779386658 | 0.5492120114110354 | 0.6827751047308480 | T | T | T |
| 0.9321915351170394 | 0.3774056404775639 | 0.9258872443654750 | T | T | T |
| 0.9084984434451747 | 0.5090378975993496 | 0.9226820317715908 | T | T | T |
| 0.8822539004631756 | 0.6399392437674916 | 0.9165407364654375 | T | T | T |
| 0.6950668424182616 | 0.3749589528643216 | 0.8958526093963708 | T | T | T |
| 0.6714731335742163 | 0.5038487321017074 | 0.9430761710279478 | T | T | T |
| 0.6896566141095469 | 0.6380990059702824 | 0.9337046559625028 | T | T | T |
| 0.4907946495025149 | 0.4516797101285947 | 0.7079833466243611 | T | T | T |
| 0.4808163501422262 | 0.6355725275617357 | 0.7061353878528600 | T | T | T |
| 0.6460754733830776 | 0.9436094032334853 | 0.2885244196336316 | T | T | T |
| 0.7015916669830840 | 0.9312506196483989 | 0.1110087851013723 | T | T | T |
| 0.8004924257108172 | 0.9381464624337793 | 0.9765056574123219 | T | T | T |
| 0.8955248257575876 | 0.9326652016249440 | 0.1178821069062394 | T | T | T |
| 0.8999106699435707 | 0.9585690242037816 | 0.3135152065872271 | T | T | T |
| 0.7740575137756900 | 0.9728559570936463 | 0.2649402275675242 | T | T | T |
| 0.6421966164378009 | 0.1707290835313448 | 0.2603003778268111 | T | T | T |
| 0.6973329970374633 | 0.1646629778232343 | 0.0840813807109375 | T | T | T |
| 0.8097369900154066 | 0.1483720726646749 | 0.9823781770826402 | T | T | T |
| 0.9128277857153515 | 0.1746080039372197 | 0.1024961380176309 | T | T | T |
| 0.8985682015437205 | 0.1554228001401718 | 0.2981314424493339 | T | T | T |
| 0.7720764959738008 | 0.1419975704028912 | 0.2456571729880189 | T | T | T |
| 0.6814319317385255 | 0.0528518140371621 | 0.1879765843487241 | T | T | T |
| 0.9246626008053326 | 0.0530492415408687 | 0.1750751428322577 | T | T | T |
| 0.5715836839493094 | 0.8777228969727655 | 0.4179059306128644 | T | T | T |
| 0.5840877788518483 | 0.0089245485298020 | 0.4384659559005739 | T | T | T |
| 0.5957416651566417 | 0.1412636965212178 | 0.4410536853221133 | T | T | T |
| 0.8127997405343141 | 0.8739167658208734 | 0.3912229098955982 | T | T | T |
| 0.8147748488744284 | 0.0011603750629002 | 0.4495669409159750 | T | T | T |
| 0.8076459939785007 | 0.1360170014374814 | 0.4383226147822325 | T | T | T |
| 0.0111167421058583 | 0.9542390774009597 | 0.2156415610043697 | T | T | T |
| 0.0176685241975979 | 0.1428034987845840 | 0.2154107860070503 | T | T | T |
| 0.8584324527799011 | 0.0596398641834236 | 0.7885976273061152 | T | T | T |
| 0.8025053465858953 | 0.0740112644188684 | 0.6113323553228611 | T | T | T |
| 0.7006193139068755 | 0.0634248468713517 | 0.4821938116471152 | T | T | T |
| 0.5999046216132863 | 0.0755263192426013 | 0.6106499288718805 | T | T | T |
| 0.6038936598855492 | 0.0510361701593016 | 0.8076583107043029 | T | T | T |
| 0.7298074006781956 | 0.0328099045480894 | 0.7641990407953081 | T | T | T |
| 0.8535628060890994 | 0.8373226705694669 | 0.7844742049533139 | T | T | T |
| 0.8180502336411226 | 0.8314928202124178 | 0.6014921830729489 | T | T | T |
| 0.6914605986935104 | 0.8449204947803247 | 0.4963360398111035 | T | T | T |
| 0.5808734987472499 | 0.8297884410755850 | 0.6022549464921866 | T | T | T |
| 0.5995246416132901 | 0.8505497733618509 | 0.7965313991717221 | T | T | T |
| 0.7266549165029815 | 0.8625047006194847 | 0.7443758576952686 | T | T | T |
| 0.8198131395488509 | 0.9511411567429653 | 0.6884596434530654 | T | T | T |
| 0.5773256637556951 | 0.9535746781164379 | 0.6754520523069742 | T | T | T |
| 0.9327738123599727 | 0.1256958009667920 | 0.9193096235768156 | T | T | T |
| 0.9170807949684480 | 0.9939417878633873 | 0.9408687904985734 | T | T | T |
| 0.9098221482290852 | 0.8614288146182596 | 0.9589647867311087 | T | T | T |
| 0.6934384210305015 | 0.1301837906506726 | 0.8912119033122736 | T | T | T |

**Structure files (CONTCAR) involved in this work:**

|                    |                    |                    |   |   |   |
|--------------------|--------------------|--------------------|---|---|---|
| 0.6865917518224506 | 0.0028818059078840 | 0.9466057344446345 | T | T | T |
| 0.6911637165036408 | 0.8688272464361240 | 0.9374759417662969 | T | T | T |
| 0.4894300762887414 | 0.0508715977573055 | 0.7179867511055132 | T | T | T |
| 0.4797250046001259 | 0.8668828607664029 | 0.7159422555396230 | T | T | T |
| 0.3600725810472474 | 0.4333392798513463 | 0.7182266302134258 | T | T | T |
| 0.3161051386823332 | 0.4497088319014449 | 0.9024870545829521 | T | T | T |
| 0.2011958854250590 | 0.4597949225737720 | 0.9998538638719462 | T | T | T |
| 0.0894758055240502 | 0.4308827199444271 | 0.9021116442863329 | T | T | T |
| 0.1017601055202938 | 0.4334712399606785 | 0.7047215995121543 | T | T | T |
| 0.2292910008788220 | 0.4442007822799770 | 0.7551593194210376 | T | T | T |
| 0.3572399085764247 | 0.6731595088077132 | 0.7492830977987522 | T | T | T |
| 0.2977783053140338 | 0.6385638696046171 | 0.9147039150349729 | T | T | T |
| 0.1879886349942244 | 0.6488999400551764 | 0.0187815677162363 | T | T | T |
| 0.0867770252258595 | 0.6670709715704433 | 0.8924985804062818 | T | T | T |
| 0.0951539362726380 | 0.6574900769965291 | 0.6971938989841140 | T | T | T |
| 0.2250294025866971 | 0.6554312038819525 | 0.7503185881653898 | T | T | T |
| 0.3076012556737506 | 0.5504297735419580 | 0.7674226975960344 | T | T | T |
| 0.0803948745991742 | 0.5464120539947146 | 0.8055161926641173 | T | T | T |
| 0.4319836368738090 | 0.3765392851327434 | 0.5729272616343289 | T | T | T |
| 0.4136451860653789 | 0.5082347147923978 | 0.5725295371692702 | T | T | T |
| 0.3860333395724732 | 0.6389366968937011 | 0.5644998130576140 | T | T | T |
| 0.1915585654483092 | 0.3584990928349380 | 0.6137291285239339 | T | T | T |
| 0.1850010505929303 | 0.4901919309144572 | 0.5794166333423034 | T | T | T |
| 0.1895912581144530 | 0.6223101541936202 | 0.5638773871729960 | T | T | T |
| 0.9845039458878134 | 0.4539314566275908 | 0.7842644566045449 | T | T | T |
| 0.9801544977905758 | 0.6343763923845327 | 0.7826602440802936 | T | T | T |
| 0.1353406209782025 | 0.5694954478862362 | 0.2226798282871215 | T | T | T |
| 0.1821761422633408 | 0.5480412622073454 | 0.4034224913424109 | T | T | T |
| 0.2946968977497255 | 0.5481180856613558 | 0.5111573263088082 | T | T | T |
| 0.4019230629423528 | 0.5714792299811321 | 0.3998560215573850 | T | T | T |
| 0.3946357373917802 | 0.5650394089304868 | 0.2041896694885042 | T | T | T |
| 0.2666004230357256 | 0.5545055937349731 | 0.2529406547393364 | T | T | T |
| 0.1380858608649357 | 0.3268524144998460 | 0.2536204458197675 | T | T | T |
| 0.1967036859196861 | 0.3667306596595184 | 0.4183531180717458 | T | T | T |
| 0.3083127948364364 | 0.3531165748247062 | 0.5198376724762047 | T | T | T |
| 0.4057131876607092 | 0.3307736595633299 | 0.3885725826564441 | T | T | T |
| 0.3934658501038241 | 0.3475299412362519 | 0.1919521179500550 | T | T | T |
| 0.2694095333804691 | 0.3475929503745407 | 0.2550199413361660 | T | T | T |
| 0.1842084077138198 | 0.4503616084994807 | 0.2653635348296403 | T | T | T |
| 0.4095528650291471 | 0.4527852111276925 | 0.3117183509141408 | T | T | T |
| 0.0643888499714805 | 0.6273317810685417 | 0.0783177046555809 | T | T | T |
| 0.0836153121362035 | 0.4959638971515637 | 0.0731880166231948 | T | T | T |
| 0.1175804797710245 | 0.3663339451604228 | 0.0664563756289193 | T | T | T |
| 0.3050661275210916 | 0.6384112989053231 | 0.1105969260485487 | T | T | T |
| 0.3119781623776489 | 0.5056617360088309 | 0.0800672803495503 | T | T | T |
| 0.2949104617720211 | 0.3734583077713966 | 0.0620458706235512 | T | T | T |
| 0.5093863212474069 | 0.5401976576842901 | 0.2918496152806676 | T | T | T |
| 0.5102628373931015 | 0.3669208461806959 | 0.2782655574537651 | T | T | T |
| 0.4336089321606718 | 0.7522189428416048 | 0.6385666085951505 | T | T | T |
| 0.1677056341059474 | 0.7468471432671743 | 0.6216562263528147 | T | T | T |
| 0.2752910844699387 | 0.7509524955873000 | 0.0184731992347154 | T | T | T |
| 0.1036977443751082 | 0.7510030124060710 | 0.0436378717336003 | T | T | T |
| 0.0654959479152491 | 0.2531678944570386 | 0.1308622594145519 | T | T | T |

**Structure files (CONTCAR) involved in this work:**

|                    |                    |                    |   |   |   |
|--------------------|--------------------|--------------------|---|---|---|
| 0.3109120876075434 | 0.2511425228039668 | 0.1304437245561522 | T | T | T |
| 0.2227658155771504 | 0.2505933610438137 | 0.5097272152791242 | T | T | T |
| 0.3933138076361043 | 0.2511616013595387 | 0.5445948893271838 | T | T | T |
| 0.5536957547779147 | 0.2500981046772082 | 0.3501429855769321 | T | T | T |
| 0.8120914304902684 | 0.2519987690625189 | 0.3438492063983617 | T | T | T |
| 0.7283895941296931 | 0.2515206839567380 | 0.9409406469171792 | T | T | T |
| 0.8922231272051037 | 0.2512669913679161 | 0.9462019566180938 | T | T | T |
| 0.9425923241692936 | 0.7519038909961108 | 0.8556184449616141 | T | T | T |
| 0.6858809488329642 | 0.7537619941972946 | 0.8435305110243165 | T | T | T |
| 0.7963984036106355 | 0.7412435004335878 | 0.4684161474939070 | T | T | T |
| 0.6010153722940301 | 0.7517548705616225 | 0.4463059727882033 | T | T | T |
| 0.9365183623792952 | 0.4921127608600709 | 0.5136949846764910 | T | T | T |
| 0.9700059637371579 | 0.7266153972367050 | 0.5759011915129539 | T | T | T |
| 0.9281138930320644 | 0.3942859938989216 | 0.4542634931937545 | T | T | T |
| 0.8986952068741298 | 0.5764706775555241 | 0.5517519330681286 | T | T | T |
| 0.8824003272552327 | 0.7565129825130904 | 0.6045992981081284 | T | T | T |
| 0.0512319854814360 | 0.7550598691598831 | 0.6337439241686985 | T | T | T |
| 0.9833949550140642 | 0.4916707611399662 | 0.5337693076499453 | T | T | T |
| 0.9498604253816514 | 0.6519367049800644 | 0.5590217069143826 | T | T | T |
| 0.0552655701777414 | 0.3888651623146471 | 0.4664345869717444 | T | T | T |
| 0.0179694343139504 | 0.3560540637389266 | 0.5784579082082342 | T | T | T |
| 0.0196475026273454 | 0.3061468405509044 | 0.4657054828364276 | T | T | T |
| 0.0150939723553867 | 0.3570796624383603 | 0.4965754325710843 | T | T | T |

**Figure S11(d) TS2**

Si Al O Zn H C

1.0000000000000000

20.0219999999999985 0.0000000000000000 0.0000000000000000

0.0000000000000000 19.8990000000000009 0.0000000000000000

0.0000000000000000 0.0000000000000000 13.3829999999999991

92 4 194 4 5 1

Selective dynamics

Direct

|                    |                    |                    |   |   |   |
|--------------------|--------------------|--------------------|---|---|---|
| 0.4230851885589463 | 0.0612017679378882 | 0.6484592903901717 | T | T | T |
| 0.3023124192988709 | 0.0347006807760070 | 0.7891016097304064 | T | T | T |
| 0.2837627817680732 | 0.0553089968016056 | 0.0165567771366484 | T | T | T |
| 0.1235045247314780 | 0.0634035565323433 | 0.0104856581312603 | T | T | T |
| 0.0688673493439595 | 0.0322531031291601 | 0.7934903574585295 | T | T | T |
| 0.1815032295367662 | 0.0742112405408189 | 0.6621059821903125 | T | T | T |
| 0.4147051458652753 | 0.8303814732716586 | 0.6737819799257156 | T | T | T |
| 0.2928158520541291 | 0.8761959407940698 | 0.7993523686035900 | T | T | T |
| 0.2680357078897864 | 0.8329461157904544 | 0.0159317871458472 | T | T | T |
| 0.1104746688824256 | 0.8288627642275893 | 0.0117333748232618 | T | T | T |
| 0.0621013077969180 | 0.8755496590432102 | 0.7951678084493119 | T | T | T |
| 0.0772532813002096 | 0.9426412650777783 | 0.1503769555868846 | T | T | T |
| 0.1976605583034612 | 0.9740061759093624 | 0.2865676123015368 | T | T | T |
| 0.2174905878258911 | 0.9514005288481933 | 0.5141384750504714 | T | T | T |
| 0.3777312448182203 | 0.9370548688571594 | 0.5133692110694439 | T | T | T |
| 0.4348236721518386 | 0.9685565089005791 | 0.3010313067073185 | T | T | T |
| 0.3215635467721596 | 0.9339254224367779 | 0.1645611595197012 | T | T | T |
| 0.0831979475743976 | 0.1756010008419437 | 0.1612638106826506 | T | T | T |
| 0.2020812844626050 | 0.1302874533267862 | 0.2910579745132006 | T | T | T |
| 0.2310739473400837 | 0.1707105803565001 | 0.5079412882798849 | T | T | T |
| 0.3869411702099527 | 0.1741434869577665 | 0.5067556109841561 | T | T | T |

**Structure files (CONTCAR) involved in this work:**

|                    |                    |                    |   |   |   |
|--------------------|--------------------|--------------------|---|---|---|
| 0.4360573568230546 | 0.1265002527133005 | 0.2938012326107701 | T | T | T |
| 0.3234091683308324 | 0.1736695073028044 | 0.1601023965807507 | T | T | T |
| 0.5756749698154039 | 0.5596064559816701 | 0.3589607942147885 | T | T | T |
| 0.6901903634831190 | 0.5269137127128480 | 0.2121635974908841 | T | T | T |
| 0.7151849557758547 | 0.5660023475297411 | 0.9926274793220562 | T | T | T |
| 0.8735879930531033 | 0.5712870536754193 | 0.9875126146984373 | T | T | T |
| 0.8139972411253259 | 0.5508256338171391 | 0.3494074607302289 | T | T | T |
| 0.5755287198467807 | 0.3277400300775126 | 0.3295418928716985 | T | T | T |
| 0.6930839857849245 | 0.3739013723663321 | 0.1912205329692175 | T | T | T |
| 0.7303913234663434 | 0.3294251035527968 | 0.9744602174663005 | T | T | T |
| 0.8857907605687493 | 0.3266894348581967 | 0.9880919613612752 | T | T | T |
| 0.9397385449402048 | 0.3763764834822333 | 0.1891467130312504 | T | T | T |
| 0.9218340432217432 | 0.4469506213141635 | 0.8586718217747082 | T | T | T |
| 0.8006137725374605 | 0.4725003913285047 | 0.7172252426778770 | T | T | T |
| 0.7795479841581310 | 0.4342418166645504 | 0.4944717133482566 | T | T | T |
| 0.6203900524614210 | 0.4312713030912586 | 0.4871502717949678 | T | T | T |
| 0.5689005772053966 | 0.4707472490585847 | 0.6977982816502175 | T | T | T |
| 0.6765056961004271 | 0.4496482852360414 | 0.8536184905961320 | T | T | T |
| 0.9195727870239008 | 0.6772017246795249 | 0.8338486970453834 | T | T | T |
| 0.7655548590078965 | 0.6737384498602468 | 0.4655431239108099 | T | T | T |
| 0.6135805973510079 | 0.6759419485095549 | 0.4932663223871922 | T | T | T |
| 0.5601370673976059 | 0.6287822353870700 | 0.7011738557071816 | T | T | T |
| 0.6743708471291141 | 0.6693352899006796 | 0.8328852585396285 | T | T | T |
| 0.5794789991146058 | 0.9455120105775663 | 0.3584710073351732 | T | T | T |
| 0.6996252939663984 | 0.9729031092132189 | 0.2128233972031990 | T | T | T |
| 0.7196334367112758 | 0.9337573259102967 | 0.9936617523830343 | T | T | T |
| 0.8794891795749465 | 0.9337119921913215 | 0.9984529384944132 | T | T | T |
| 0.9330888459513040 | 0.9757253908707627 | 0.2043306846711796 | T | T | T |
| 0.8237013997883397 | 0.9525527344663978 | 0.3540109276162550 | T | T | T |
| 0.5776693063306616 | 0.1722054230134716 | 0.3345034630890502 | T | T | T |
| 0.6988116433421535 | 0.1289469733613099 | 0.1976924717392614 | T | T | T |
| 0.7316594934736819 | 0.1729250719482886 | 0.9783775738204252 | T | T | T |
| 0.8875007798912822 | 0.1746831501452877 | 0.9843776331431643 | T | T | T |
| 0.9381859576524906 | 0.1320703834266926 | 0.1958664731305981 | T | T | T |
| 0.8212965436488671 | 0.1716243865569841 | 0.3311258126300163 | T | T | T |
| 0.9234012225233876 | 0.0526080296025911 | 0.8563136649129468 | T | T | T |
| 0.8006426743945460 | 0.0243796755530794 | 0.7106680880485295 | T | T | T |
| 0.7811392549254484 | 0.0713020801528720 | 0.4937670414184153 | T | T | T |
| 0.6206546362113782 | 0.0706756795104493 | 0.4934112967250856 | T | T | T |
| 0.5681206057404093 | 0.0320510134759525 | 0.7038766306066057 | T | T | T |
| 0.6781768577975988 | 0.0521624490870111 | 0.8549134430335358 | T | T | T |
| 0.9211834155479196 | 0.8307122479937363 | 0.8450927615397416 | T | T | T |
| 0.8010329317393020 | 0.8665995646804443 | 0.6985106555561366 | T | T | T |
| 0.6130958884956383 | 0.8303207594603361 | 0.4953134462962928 | T | T | T |
| 0.5589258336843087 | 0.8741380866326034 | 0.7028219869764079 | T | T | T |
| 0.6768966851805333 | 0.8293297016162395 | 0.8319425669574106 | T | T | T |
| 0.4223002166895292 | 0.4424482199183998 | 0.6434268630473428 | T | T | T |
| 0.3030214395937936 | 0.4662297605409885 | 0.7872535477362500 | T | T | T |
| 0.2804278054557860 | 0.4476543989837588 | 0.0134533325313024 | T | T | T |
| 0.1224783596475898 | 0.4406463086450425 | 0.0106106001020456 | T | T | T |
| 0.0653594054020630 | 0.4683016493208251 | 0.7942102733008407 | T | T | T |
| 0.1790621140425781 | 0.4270034096574797 | 0.6625787266050467 | T | T | T |
| 0.4149528556617048 | 0.6750015467873047 | 0.6688775912402979 | T | T | T |

**Structure files (CONTCAR) involved in this work:**

|                     |                    |                    |   |   |   |
|---------------------|--------------------|--------------------|---|---|---|
| 0.2929187780075680  | 0.6254053472361507 | 0.7923474121008531 | T | T | T |
| 0.2673035163168302  | 0.6722661388206617 | 0.0135214835083619 | T | T | T |
| 0.1112152146593791  | 0.6732783227089270 | 0.0124841685751067 | T | T | T |
| 0.0630545029778064  | 0.6261975009110848 | 0.7956669617518501 | T | T | T |
| 0.1726148812960502  | 0.6709412755882220 | 0.6537919616532517 | T | T | T |
| 0.0722110172991971  | 0.5597393361808964 | 0.1509315047750749 | T | T | T |
| 0.1950531648975353  | 0.5305892362283665 | 0.2852011567287819 | T | T | T |
| 0.2124574815715312  | 0.5509062116539979 | 0.5167135126402869 | T | T | T |
| 0.3730325180356627  | 0.5686323270415674 | 0.5147005323628506 | T | T | T |
| 0.4291801007900666  | 0.5335608470192461 | 0.3027325707784502 | T | T | T |
| 0.3198720405674520  | 0.5690103388413495 | 0.1593162194495066 | T | T | T |
| 0.0852760918723240  | 0.3291576986914822 | 0.1585811412575582 | T | T | T |
| 0.2007942934872452  | 0.3733792575630614 | 0.2933169000194749 | T | T | T |
| 0.2303749334585738  | 0.3313387808255902 | 0.5088587171420451 | T | T | T |
| 0.3853435992389292  | 0.3285149959641668 | 0.5032831814267931 | T | T | T |
| 0.4327627669926032  | 0.3752056246938309 | 0.2910938376272738 | T | T | T |
| 0.3193565635364197  | 0.3294681873438934 | 0.1581134913601776 | T | T | T |
| 0.9258567271545592  | 0.5311046309477963 | 0.1947705656022360 | T | T | T |
| 0.8199003205321492  | 0.3344586416952931 | 0.3227195704474355 | T | T | T |
| 0.7991042828025261  | 0.6331335051700711 | 0.6924991047324160 | T | T | T |
| 0.1778537810835820  | 0.8283803655512362 | 0.6558465851791037 | T | T | T |
| 0.7675059545710848  | 0.8305589261453682 | 0.4750221941802821 | T | T | T |
| 0.0034035522215989  | 0.5508339103385199 | 0.2141013604597689 | T | T | T |
| 0.3597483380869118  | 0.0707029294278873 | 0.7225009608544991 | T | T | T |
| 0.3164292897333892  | 0.0503429673975042 | 0.9060938042478895 | T | T | T |
| 0.2030862708089755  | 0.0503006184274652 | 0.0089655610598581 | T | T | T |
| 0.0951702809147290  | 0.0640148709337574 | 0.8974524384284107 | T | T | T |
| 0.1041966453362624  | 0.0704493158634429 | 0.7003597085510131 | T | T | T |
| 0.2300247250758222  | 0.0668852737383418 | 0.7594721979567051 | T | T | T |
| 0.3537622806137395  | 0.8319766365247231 | 0.7530152120025831 | T | T | T |
| 0.2988297908383193  | 0.8720087236630182 | 0.9206095878008426 | T | T | T |
| 0.1883925749914402  | 0.8490184699084490 | 0.0243133172792277 | T | T | T |
| 0.0868833392246997  | 0.8404931593031619 | 0.8970604897935618 | T | T | T |
| 0.0898623547340521  | 0.8306143498832934 | 0.6989517264067374 | T | T | T |
| 0.2220836681375423  | 0.8471371678199435 | 0.7630114982860662 | T | T | T |
| 0.3033035622149128  | 0.9545491994225320 | 0.7659413382158612 | T | T | T |
| 0.0878556571817630  | 0.9521618039260796 | 0.7866619397553581 | T | T | T |
| 0.4320529767987401  | 0.1287847052042571 | 0.5811733681490071 | T | T | T |
| 0.4139661373122397  | 0.9975288476550245 | 0.5742901009553826 | T | T | T |
| 0.3927826235766120  | 0.8664865190726870 | 0.5699600371781920 | T | T | T |
| 0.1924698696213243  | 0.1471729804549279 | 0.6087524393137833 | T | T | T |
| 0.1969923643935137  | 0.0155854536610872 | 0.5827770774652521 | T | T | T |
| 0.1887696940887265  | 0.8829847887851220 | 0.5587447487259369 | T | T | T |
| 0.9884864103792056  | 0.0412587778510513 | 0.7858040206849927 | T | T | T |
| 0.9806606929531028  | 0.8720688950983795 | 0.7883555805646690 | T | T | T |
| 0.1414535143151016  | 0.9335627092764471 | 0.2228183191115472 | T | T | T |
| 0.18479377371113814 | 0.9647287058681195 | 0.4042666546882816 | T | T | T |
| 0.2985786895803536  | 0.9510500408328280 | 0.5044969140471729 | T | T | T |
| 0.4102475677857114  | 0.9321126079610438 | 0.4028330970933783 | T | T | T |
| 0.3979319968828769  | 0.9342193871033442 | 0.2053388058560629 | T | T | T |
| 0.2713719190438682  | 0.9454789518358580 | 0.2588390221091004 | T | T | T |
| 0.1435879096882930  | 0.1759930739365589 | 0.2420011565261052 | T | T | T |
| 0.1973003538596694  | 0.1343331734227411 | 0.4117072401566402 | T | T | T |



**Structure files (CONTCAR) involved in this work:**

|                    |                    |                    |   |   |   |
|--------------------|--------------------|--------------------|---|---|---|
| 0.3094269428091133 | 0.1496156278945325 | 0.5140291530449710 | T | T | T |
| 0.4130854423153273 | 0.1679032298693270 | 0.3926637879652440 | T | T | T |
| 0.3996909074342103 | 0.1592521527593249 | 0.1962562915790896 | T | T | T |
| 0.2743554083641273 | 0.1588289173388149 | 0.2551373805845364 | T | T | T |
| 0.1923378638046182 | 0.0531330004714576 | 0.2541557413235024 | T | T | T |
| 0.4149579668062218 | 0.0481210827058873 | 0.3053959333360339 | T | T | T |
| 0.0656334299356455 | 0.8737689834249722 | 0.0870014192533793 | T | T | T |
| 0.0868202865347373 | 0.0037454912612059 | 0.0715079659059736 | T | T | T |
| 0.1050311759193223 | 0.1353886861125999 | 0.0608376095858629 | T | T | T |
| 0.3059545135321598 | 0.8609889857383739 | 0.1146495237008216 | T | T | T |
| 0.3117951767597247 | 0.9939473100751264 | 0.0837765850288510 | T | T | T |
| 0.3043679152738563 | 0.1271680964812965 | 0.0650839295385159 | T | T | T |
| 0.5148657222663927 | 0.9593924669773034 | 0.2874512104035101 | T | T | T |
| 0.5163764181237465 | 0.1332555155574786 | 0.2790056930761479 | T | T | T |
| 0.6376151751630741 | 0.5671461549314454 | 0.2816507302901822 | T | T | T |
| 0.7021797915413828 | 0.5707846597501085 | 0.1117849406280851 | T | T | T |
| 0.7949208032856013 | 0.5557964615278251 | 0.9708126207005691 | T | T | T |
| 0.8920314797157377 | 0.5756220485704429 | 0.1059138949787702 | T | T | T |
| 0.8880735575680621 | 0.5422054298699226 | 0.3016585766933746 | T | T | T |
| 0.7605849729656003 | 0.5202194842221445 | 0.2727504002761485 | T | T | T |
| 0.6400536600541724 | 0.3307219627930250 | 0.2571803007616711 | T | T | T |
| 0.6916049962873936 | 0.3436141879031994 | 0.0781839369704239 | T | T | T |
| 0.8086556972616417 | 0.3517873596987010 | 0.9842763375351543 | T | T | T |
| 0.9107678029902055 | 0.3264759905494820 | 0.1040651913759088 | T | T | T |
| 0.9059543241039389 | 0.3580946632398694 | 0.2974834443114990 | T | T | T |
| 0.7668560408218418 | 0.3712469887341359 | 0.2379240250718855 | T | T | T |
| 0.6650807874426563 | 0.4514967446622984 | 0.1869858391542092 | T | T | T |
| 0.9205079656378951 | 0.4531298282001786 | 0.1595220256601797 | T | T | T |
| 0.5670735811803714 | 0.6284502576043454 | 0.4224540474282172 | T | T | T |
| 0.5882087268372876 | 0.4974319104025986 | 0.4359055554577317 | T | T | T |
| 0.5910949714449173 | 0.3635212181611293 | 0.4369428595936701 | T | T | T |
| 0.8007862844391257 | 0.6277924408539319 | 0.3788800751288677 | T | T | T |
| 0.8103988610249452 | 0.5090539223860221 | 0.4582932836397150 | T | T | T |
| 0.8229004495534378 | 0.3766090132680590 | 0.4404946558122225 | T | T | T |
| 0.0198795601481500 | 0.3689018724059007 | 0.2006508906217291 | T | T | T |
| 0.8554657269309932 | 0.4381840716049288 | 0.7891605647454559 | T | T | T |
| 0.7946767245085338 | 0.4295893320359818 | 0.6140398307264076 | T | T | T |
| 0.7012706063197466 | 0.4322291169066974 | 0.4690680392920102 | T | T | T |
| 0.6049952303343554 | 0.4307373141198800 | 0.6059664366765734 | T | T | T |
| 0.6034176850355861 | 0.4478747157156668 | 0.8023497546746546 | T | T | T |
| 0.7294444274978187 | 0.4797359283782040 | 0.7708572499860938 | T | T | T |
| 0.8615857522292608 | 0.6806869266814700 | 0.7498332378342855 | T | T | T |
| 0.8101646002371675 | 0.6645157914683072 | 0.5697263271891386 | T | T | T |
| 0.6901630627669971 | 0.6460537381066269 | 0.4889169686815082 | T | T | T |
| 0.5863723676045242 | 0.6730532077936768 | 0.6073296559040094 | T | T | T |
| 0.5965258140273669 | 0.6544242497109796 | 0.8029870850915545 | T | T | T |
| 0.7228742244110870 | 0.6383936172222752 | 0.7480145088351480 | T | T | T |
| 0.8295427112535388 | 0.5474411482650471 | 0.6801714985205696 | T | T | T |
| 0.5787917597184747 | 0.5505677532413291 | 0.6791366419242152 | T | T | T |
| 0.9316663287087901 | 0.3787799993691808 | 0.9235994890266926 | T | T | T |
| 0.9158695462176061 | 0.5116987594331540 | 0.9324399080183507 | T | T | T |
| 0.8928031225428629 | 0.6429580098873572 | 0.9367313668923907 | T | T | T |
| 0.6973763565949296 | 0.3739915125214053 | 0.8851440704126802 | T | T | T |

**Structure files (CONTCAR) involved in this work:**

|                    |                    |                    |   |   |   |
|--------------------|--------------------|--------------------|---|---|---|
| 0.6765318308397795 | 0.4999767357662468 | 0.9491253281391772 | T | T | T |
| 0.6890178606738444 | 0.6346182418258096 | 0.9414438727824974 | T | T | T |
| 0.4904914196389527 | 0.4519272807448904 | 0.7070144465835514 | T | T | T |
| 0.4798204314523564 | 0.6365485522206351 | 0.7151909200287688 | T | T | T |
| 0.6453191373390470 | 0.9405290402611828 | 0.2883344884132802 | T | T | T |
| 0.7006376575147455 | 0.9279375092787315 | 0.1109552076529620 | T | T | T |
| 0.8001115652015343 | 0.9433541827086821 | 0.9789076578262833 | T | T | T |
| 0.8978851449925889 | 0.9318889361447726 | 0.1158535691784706 | T | T | T |
| 0.8994837944664632 | 0.9609081959433748 | 0.3111781837285973 | T | T | T |
| 0.7731138044354865 | 0.9727598833554310 | 0.2627789301842503 | T | T | T |
| 0.6435044761384766 | 0.1675888664391911 | 0.2647874848299887 | T | T | T |
| 0.6984913040254079 | 0.1640232218445409 | 0.0879676217740062 | T | T | T |
| 0.8099375549918999 | 0.1505386187667338 | 0.9833247067321886 | T | T | T |
| 0.9155400970919767 | 0.1748634909317835 | 0.0979083714018615 | T | T | T |
| 0.8982452028174136 | 0.1565038946960863 | 0.2948035923067255 | T | T | T |
| 0.7719388176907378 | 0.1353748907310530 | 0.2494672700677264 | T | T | T |
| 0.6791476946872932 | 0.0501123806574279 | 0.1857820824973869 | T | T | T |
| 0.9240610307089892 | 0.0537759517924915 | 0.1714983956572605 | T | T | T |
| 0.5686090758433689 | 0.8752186519231657 | 0.4177043970058352 | T | T | T |
| 0.5861941040353887 | 0.0063658201171278 | 0.4394359567591947 | T | T | T |
| 0.5918925145755536 | 0.1395471636203863 | 0.4437867248556738 | T | T | T |
| 0.8130415176202052 | 0.8782841024186518 | 0.3939782290255271 | T | T | T |
| 0.8155564356710634 | 0.0057904968382530 | 0.4454270732220090 | T | T | T |
| 0.8101220279620943 | 0.1392114070400667 | 0.4421057071867046 | T | T | T |
| 0.0114919000850228 | 0.9567885814499004 | 0.2170130496330852 | T | T | T |
| 0.0177797670519113 | 0.1433317715405806 | 0.2146993879638771 | T | T | T |
| 0.8580649939217072 | 0.0516803596949473 | 0.7855389717860530 | T | T | T |
| 0.7995793126523620 | 0.0719939478155098 | 0.6124559351787568 | T | T | T |
| 0.7007875913637293 | 0.0674164496181058 | 0.4777466998793738 | T | T | T |
| 0.6023076569962300 | 0.0724955521518598 | 0.6113930736769446 | T | T | T |
| 0.6033897150742338 | 0.0531763248617733 | 0.8086125567264032 | T | T | T |
| 0.7292039744883827 | 0.0284400764382056 | 0.7671317252262519 | T | T | T |
| 0.8556845105627351 | 0.8337719908200816 | 0.7744746381319759 | T | T | T |
| 0.8120220873630847 | 0.8226952251407219 | 0.5951381980892410 | T | T | T |
| 0.6880464010943964 | 0.8587309777600769 | 0.5032029092372604 | T | T | T |
| 0.5772336115575191 | 0.8302915180166366 | 0.6047967119883638 | T | T | T |
| 0.6005880989804024 | 0.8470348965587623 | 0.7997832977658831 | T | T | T |
| 0.7268066923433960 | 0.8556930503553474 | 0.7433545638618740 | T | T | T |
| 0.8152017876095956 | 0.9459458945993399 | 0.6798352487860249 | T | T | T |
| 0.5775297591228982 | 0.9523254781911228 | 0.6830609585171366 | T | T | T |
| 0.9302381094911516 | 0.1250680207142537 | 0.9122477556137099 | T | T | T |
| 0.9195432421290390 | 0.9935086120565177 | 0.9405618020456546 | T | T | T |
| 0.9043425156626792 | 0.8614669578198345 | 0.9536963495939584 | T | T | T |
| 0.6946784456513464 | 0.1273438764150834 | 0.8949128139939824 | T | T | T |
| 0.6822204917184493 | 0.9991950746206595 | 0.9471021061749739 | T | T | T |
| 0.6958833294807478 | 0.8656286330718741 | 0.9369710306711109 | T | T | T |
| 0.4897815969147675 | 0.0512290134758988 | 0.7153750550210342 | T | T | T |
| 0.4793138201351614 | 0.8666173400656917 | 0.7249843352418492 | T | T | T |
| 0.3606970524428289 | 0.4306324200011719 | 0.7204977990089548 | T | T | T |
| 0.3156743668979728 | 0.4494194744131214 | 0.9042277415860603 | T | T | T |
| 0.2005614010759647 | 0.4606585242018298 | 0.0013640881906740 | T | T | T |
| 0.0889256516104528 | 0.4384798302201736 | 0.9007821323442906 | T | T | T |
| 0.1024834897918959 | 0.4287234303022244 | 0.7039981384748316 | T | T | T |

**Structure files (CONTCAR) involved in this work:**

|                    |                    |                    |   |   |   |
|--------------------|--------------------|--------------------|---|---|---|
| 0.2299113591699759 | 0.4366385496247568 | 0.7564382662896323 | T | T | T |
| 0.3535156050942448 | 0.6698928095299029 | 0.7479108009554213 | T | T | T |
| 0.2908784070639838 | 0.6349727330614675 | 0.9119643214264420 | T | T | T |
| 0.1888407333714760 | 0.6541842389549282 | 0.0320855370004315 | T | T | T |
| 0.0924226788090317 | 0.6595623086335758 | 0.8962271883125371 | T | T | T |
| 0.0942572299773302 | 0.6683752518803784 | 0.6998703946865448 | T | T | T |
| 0.2215712892174228 | 0.6488582923386572 | 0.7452539823931482 | T | T | T |
| 0.3053619164977760 | 0.5466740981513623 | 0.7659226411635798 | T | T | T |
| 0.0842111600667470 | 0.5479518248059482 | 0.7862327029071176 | T | T | T |
| 0.4317531682464272 | 0.3772564779541148 | 0.5714925330357192 | T | T | T |
| 0.4101607212892359 | 0.5082734504368425 | 0.5743304488891541 | T | T | T |
| 0.3924542378756338 | 0.6403234449635926 | 0.5640379484160982 | T | T | T |
| 0.1909000918363963 | 0.3545284560986491 | 0.6093517118601943 | T | T | T |
| 0.1901686258689798 | 0.4860766041137556 | 0.5813765386023784 | T | T | T |
| 0.1773076300026320 | 0.6174743694489853 | 0.5627244854501418 | T | T | T |
| 0.9848701873371795 | 0.4578152138717753 | 0.7834821191160006 | T | T | T |
| 0.9823888114645727 | 0.6332886009825620 | 0.7906722406633139 | T | T | T |
| 0.1340291832576955 | 0.5678973608359721 | 0.2278534561179279 | T | T | T |
| 0.1853296509288453 | 0.5415152618661117 | 0.4037304267421712 | T | T | T |
| 0.2928954290609243 | 0.5575583837081575 | 0.5183375301278310 | T | T | T |
| 0.3984319852879649 | 0.5702533320020290 | 0.4003053576419711 | T | T | T |
| 0.3950001723747744 | 0.5659652478384083 | 0.2039531604450927 | T | T | T |
| 0.2661305477640059 | 0.5618788882601193 | 0.2504164651771837 | T | T | T |
| 0.1397029662927362 | 0.3295661720930366 | 0.2481238893762849 | T | T | T |
| 0.1966546304028438 | 0.3699411177062961 | 0.4140741871908256 | T | T | T |
| 0.3082912534251961 | 0.3539746959226946 | 0.5156205475715898 | T | T | T |
| 0.4076885447097360 | 0.3317665185822133 | 0.3868849893292732 | T | T | T |
| 0.3954607729769792 | 0.3486075158755652 | 0.1903825277007683 | T | T | T |
| 0.2715268516484205 | 0.3427700786052424 | 0.2552787288113122 | T | T | T |
| 0.1927508570144333 | 0.4509219674877387 | 0.2563381149535868 | T | T | T |
| 0.4134538057130426 | 0.4535259561712605 | 0.3097584035919627 | T | T | T |
| 0.0643114833111926 | 0.6271485938885412 | 0.0835302745009154 | T | T | T |
| 0.0826209067737042 | 0.4955797260785426 | 0.0775666617414522 | T | T | T |
| 0.1144980346376921 | 0.3665955021206256 | 0.0599333947898254 | T | T | T |
| 0.3103631159417034 | 0.6413995525890909 | 0.1053097199311796 | T | T | T |
| 0.3109377125956231 | 0.5075820066831589 | 0.0808871693378278 | T | T | T |
| 0.2946834848521584 | 0.3749894726148512 | 0.0643129722483241 | T | T | T |
| 0.5088414987342708 | 0.5459230534535383 | 0.2942796483077567 | T | T | T |
| 0.5128217448196172 | 0.3660912753265594 | 0.2763791190626123 | T | T | T |
| 0.4326939301795582 | 0.7527293182916277 | 0.6476221314921227 | T | T | T |
| 0.1823405511549862 | 0.7457107956972522 | 0.6141507464865558 | T | T | T |
| 0.2792113822762572 | 0.7523305389474031 | 0.0065054887307862 | T | T | T |
| 0.0972537692123377 | 0.7508693781607750 | 0.0397832152345404 | T | T | T |
| 0.0669409716696343 | 0.2527201169969589 | 0.1286452962677757 | T | T | T |
| 0.3152836280369268 | 0.2514033850159333 | 0.1245959169035303 | T | T | T |
| 0.2231674638970796 | 0.2512794531357140 | 0.4951446217652819 | T | T | T |
| 0.3930096767416507 | 0.2519748942472641 | 0.5423783335498686 | T | T | T |
| 0.5569298023954949 | 0.2501704818573258 | 0.3518918365748483 | T | T | T |
| 0.8084594706611976 | 0.2505419787878965 | 0.3370326684681211 | T | T | T |
| 0.7249299565804800 | 0.2509352671833250 | 0.9433582737455931 | T | T | T |
| 0.8938807495290066 | 0.2515776307987583 | 0.9424188288028874 | T | T | T |
| 0.9459752033596835 | 0.7530806769591182 | 0.8574029614985663 | T | T | T |
| 0.6863093819367740 | 0.7493371826991959 | 0.8470176642315206 | T | T | T |

**Structure files (CONTCAR) involved in this work:**

|                    |                    |                    |   |   |   |
|--------------------|--------------------|--------------------|---|---|---|
| 0.7694701595903694 | 0.7493249345720100 | 0.4302540596560352 | T | T | T |
| 0.6104842598023308 | 0.7526321422789906 | 0.4543328922183316 | T | T | T |
| 0.9522137799436056 | 0.4715237219204499 | 0.5059290600391917 | T | T | T |
| 0.9646874616402740 | 0.7262316855355646 | 0.5789816234321399 | T | T | T |
| 0.9346992118704145 | 0.3937937424745134 | 0.4347420447018154 | T | T | T |
| 0.8914103752529301 | 0.5286684630845366 | 0.5682882843791909 | T | T | T |
| 0.8766973805240671 | 0.7457828548889838 | 0.6020330998459885 | T | T | T |
| 0.0341236533612220 | 0.7615170932564701 | 0.6437420334658415 | T | T | T |
| 0.9750480622441362 | 0.5547755315131385 | 0.5053293637570128 | T | T | T |
| 0.9673304626499977 | 0.5929467070631955 | 0.5233020987684562 | T | T | T |
| 0.0549039811583482 | 0.3535803910855496 | 0.4504664043079740 | T | T | T |
| 0.0100748951569088 | 0.3364728667667881 | 0.5668626353446696 | T | T | T |
| 0.9950040452692357 | 0.2832528653548722 | 0.4556096884617540 | T | T | T |
| 0.0101840637246107 | 0.3322178349556763 | 0.4854629913387368 | T | T | T |

**Figure S12(a)**

Si Al O Zn H C

|                     |                     |                     |
|---------------------|---------------------|---------------------|
| 1.0000000000000000  |                     |                     |
| 20.0219999999999985 | 0.0000000000000000  | 0.0000000000000000  |
| 0.0000000000000000  | 19.8990000000000009 | 0.0000000000000000  |
| 0.0000000000000000  | 0.0000000000000000  | 13.3829999999999991 |
| 93                  | 3                   | 193                 |
| 2                   | 7                   | 2                   |

Selective dynamics

Direct

|                    |                    |                    |   |   |   |
|--------------------|--------------------|--------------------|---|---|---|
| 0.4230114341656075 | 0.0597070502721438 | 0.6484133753108697 | T | T | T |
| 0.3059182995586900 | 0.0316456076637529 | 0.7930111993076411 | T | T | T |
| 0.2826259140908105 | 0.0562486430377520 | 0.0172227649769738 | T | T | T |
| 0.1237284887142275 | 0.0615076950708991 | 0.0119683190752113 | T | T | T |
| 0.0685774191216119 | 0.0307790851916824 | 0.8006637586555602 | T | T | T |
| 0.1811553027024703 | 0.0641495440155324 | 0.6654284438208604 | T | T | T |
| 0.4187829167223883 | 0.8263590335251608 | 0.6676357943364536 | T | T | T |
| 0.3013397158330419 | 0.8724482329952060 | 0.8005730891625608 | T | T | T |
| 0.2671778690430208 | 0.8300672300763428 | 0.0199365180607289 | T | T | T |
| 0.1118961731806480 | 0.8267154670501320 | 0.0115939375282402 | T | T | T |
| 0.0665286523445335 | 0.8743487323629283 | 0.7974459649839355 | T | T | T |
| 0.1796808228458157 | 0.8285063285056591 | 0.6644522863812949 | T | T | T |
| 0.0759707763434043 | 0.9400979607628875 | 0.1489328578680149 | T | T | T |
| 0.1951482846426329 | 0.9693023806527329 | 0.2902595922383829 | T | T | T |
| 0.2169408024466144 | 0.9431570777815513 | 0.5160975678897907 | T | T | T |
| 0.3773915908021142 | 0.9352270670479710 | 0.5132770686080893 | T | T | T |
| 0.4338662900572869 | 0.9683536283395238 | 0.3010508045036063 | T | T | T |
| 0.3207261926236206 | 0.9353199806309965 | 0.1641222835611908 | T | T | T |
| 0.0829382924930432 | 0.1710850475640966 | 0.1662669082159890 | T | T | T |
| 0.1981045502921533 | 0.1278693985788999 | 0.3024994810957291 | T | T | T |
| 0.2324705175731546 | 0.1684725333472443 | 0.5193350403878433 | T | T | T |
| 0.3878854072824773 | 0.1732715568175021 | 0.5086130291510323 | T | T | T |
| 0.4354173812726996 | 0.1268836032957976 | 0.2946359434618946 | T | T | T |
| 0.3181689507763975 | 0.1723214107546495 | 0.1671553215372965 | T | T | T |
| 0.5785294039130003 | 0.5560185477339457 | 0.3536814438946844 | T | T | T |
| 0.6923819038646083 | 0.5256206646538624 | 0.2043356036682616 | T | T | T |
| 0.7189909876727701 | 0.5671851246920802 | 0.9860149359139800 | T | T | T |
| 0.8772517442963932 | 0.5734452555356353 | 0.9853715343677306 | T | T | T |
| 0.8131730913697880 | 0.5483629571555433 | 0.3488275197823259 | T | T | T |
| 0.5748111121441544 | 0.3281718946774420 | 0.3305119210307043 | T | T | T |

**Structure files (CONTCAR) involved in this work:**

|                    |                    |                    |   |   |   |
|--------------------|--------------------|--------------------|---|---|---|
| 0.6929133578032435 | 0.3720760978635626 | 0.1881944237211953 | T | T | T |
| 0.7318785589647462 | 0.3270988694643759 | 0.9763216240352556 | T | T | T |
| 0.8867591787697832 | 0.3238818099355968 | 0.9919996875410865 | T | T | T |
| 0.9435441850954857 | 0.3708268751997733 | 0.1892884513630701 | T | T | T |
| 0.9211256527747417 | 0.4447161398571873 | 0.8623328880948939 | T | T | T |
| 0.8030454165471269 | 0.4715521844612406 | 0.7184558670993051 | T | T | T |
| 0.7799785851390765 | 0.4346402231624475 | 0.4976613238890219 | T | T | T |
| 0.6204162298914716 | 0.4293011671279086 | 0.4897301714012799 | T | T | T |
| 0.5691914304242532 | 0.4687564337321429 | 0.7024367452281078 | T | T | T |
| 0.6790906487015710 | 0.4473774503285887 | 0.8525766919275831 | T | T | T |
| 0.9222018876325777 | 0.6780859384297363 | 0.8285407183574183 | T | T | T |
| 0.7706889650960048 | 0.6682953163150182 | 0.4663844712468421 | T | T | T |
| 0.6154623754894611 | 0.6725740687671086 | 0.4881973408358470 | T | T | T |
| 0.5617652451980583 | 0.6269955968626090 | 0.6982531168351322 | T | T | T |
| 0.6737281382746221 | 0.6714977523752350 | 0.8285050947464987 | T | T | T |
| 0.5785836981840307 | 0.9443089289113750 | 0.3579588567769357 | T | T | T |
| 0.6983595671201377 | 0.9720997135553633 | 0.2132457498986751 | T | T | T |
| 0.7201178184622361 | 0.9353562617498699 | 0.9923850979903901 | T | T | T |
| 0.8800969264043790 | 0.9328368143229026 | 0.9943476340160173 | T | T | T |
| 0.9311015596031113 | 0.9701881237345349 | 0.2043861347708296 | T | T | T |
| 0.8219841949478816 | 0.9460877654438604 | 0.3544965386287935 | T | T | T |
| 0.5782010678511181 | 0.1728381432113054 | 0.3296949700318594 | T | T | T |
| 0.6982653468122232 | 0.1294645404183759 | 0.1933150817558687 | T | T | T |
| 0.7322978682871311 | 0.1707644221013024 | 0.9724312968640334 | T | T | T |
| 0.8869859635655789 | 0.1722727779916252 | 0.9813517939628742 | T | T | T |
| 0.9358456648753526 | 0.1281544731469453 | 0.1953739049071969 | T | T | T |
| 0.8203685536529612 | 0.1714291785272583 | 0.3289187818000809 | T | T | T |
| 0.9235676299000818 | 0.0529453986961454 | 0.8551789670000047 | T | T | T |
| 0.8018711548666809 | 0.0257737487995091 | 0.7091099897614077 | T | T | T |
| 0.7814796075705013 | 0.0660328826227743 | 0.4914036972180090 | T | T | T |
| 0.6209619012820938 | 0.0694891936162864 | 0.4901618468336900 | T | T | T |
| 0.5683558835260656 | 0.0308144406820831 | 0.6993071308206875 | T | T | T |
| 0.6784625312881497 | 0.0522042363752486 | 0.8503281826312884 | T | T | T |
| 0.9243523564999688 | 0.8307929188942674 | 0.8357316123402171 | T | T | T |
| 0.8029453939187009 | 0.8685485476870056 | 0.6945836955514503 | T | T | T |
| 0.7705431269699275 | 0.8257547325475143 | 0.4776011453144952 | T | T | T |
| 0.6155525117560355 | 0.8260275453193874 | 0.4898818753650243 | T | T | T |
| 0.5638482687923757 | 0.8734252622675117 | 0.6979381168823373 | T | T | T |
| 0.6791098298256093 | 0.8309221051041984 | 0.8318037264781579 | T | T | T |
| 0.4233788921005350 | 0.4412939061478875 | 0.6482406319109671 | T | T | T |
| 0.3044777296861784 | 0.4694261325048927 | 0.7904606223668641 | T | T | T |
| 0.2791679090869185 | 0.4453211223798481 | 0.0170704017676826 | T | T | T |
| 0.1208001509016904 | 0.4375549185372234 | 0.0166307439712038 | T | T | T |
| 0.0641065218648732 | 0.4684651595368816 | 0.8020021224106006 | T | T | T |
| 0.1775144546865251 | 0.4351732900743306 | 0.6638602484234429 | T | T | T |
| 0.4158831218340988 | 0.6726733413309062 | 0.6670679573015920 | T | T | T |
| 0.3020422003110673 | 0.6281140565607948 | 0.8037213503195052 | T | T | T |
| 0.2668969869340240 | 0.6686050314745412 | 0.0211327884100321 | T | T | T |
| 0.1119889552576991 | 0.6725209099836645 | 0.0077554041165234 | T | T | T |
| 0.0632521224643186 | 0.6273192560335917 | 0.7932047846403336 | T | T | T |
| 0.1816089861950152 | 0.6715187573445733 | 0.6664325657695779 | T | T | T |
| 0.0785097512313940 | 0.5599125146224677 | 0.1496689105058606 | T | T | T |
| 0.1959981725308064 | 0.5286765176461709 | 0.2922135734358665 | T | T | T |

**Structure files (CONTCAR) involved in this work:**

|                    |                    |                    |   |   |   |
|--------------------|--------------------|--------------------|---|---|---|
| 0.2155155968354223 | 0.5549566963790202 | 0.5176600089588244 | T | T | T |
| 0.3739913071164149 | 0.5639068189077897 | 0.5155175046817700 | T | T | T |
| 0.4305406047638674 | 0.5314776654561437 | 0.3046522896824903 | T | T | T |
| 0.3204219074542656 | 0.5634585549493643 | 0.1648184623745232 | T | T | T |
| 0.0870125838491093 | 0.3232329631081828 | 0.1635545994176865 | T | T | T |
| 0.1990211186332716 | 0.3706232801152840 | 0.3021722150848550 | T | T | T |
| 0.2306653277828214 | 0.3298851086729377 | 0.5198422716746839 | T | T | T |
| 0.3856710340089471 | 0.3275825351012668 | 0.5077235319665099 | T | T | T |
| 0.4319557836204018 | 0.3740315219240007 | 0.2943637739462743 | T | T | T |
| 0.3175319976722498 | 0.3298467628949074 | 0.1652248551589122 | T | T | T |
| 0.9240842712699818 | 0.5270483424208455 | 0.1936653239206366 | T | T | T |
| 0.8192483213256192 | 0.3330711478933311 | 0.3224572151964715 | T | T | T |
| 0.7997527892541724 | 0.6338803835764375 | 0.6956368065001096 | T | T | T |
| 0.0110610861852885 | 0.5573714710568393 | 0.2268270568622245 | T | T | T |
| 0.3594650910194075 | 0.0702186182735298 | 0.7223530460629891 | T | T | T |
| 0.3175386496278589 | 0.0550198518116405 | 0.9077388532132252 | T | T | T |
| 0.2028089320680674 | 0.0449839267505697 | 0.0059670956674682 | T | T | T |
| 0.0925904892675332 | 0.0694434259145846 | 0.9011467502273035 | T | T | T |
| 0.1043249937092112 | 0.0646751831717721 | 0.7040582210492027 | T | T | T |
| 0.2300269759246766 | 0.0509877535387027 | 0.7607541424877859 | T | T | T |
| 0.3594510667892212 | 0.8272361482274854 | 0.7502052817218627 | T | T | T |
| 0.3019187514331401 | 0.8588156582963169 | 0.9195017725969479 | T | T | T |
| 0.1889215689214776 | 0.8520898726702391 | 0.0213095998656261 | T | T | T |
| 0.0878889564888196 | 0.8323570451488700 | 0.8965489078148139 | T | T | T |
| 0.1028074830244897 | 0.8403221146701095 | 0.7007368170386677 | T | T | T |
| 0.2286921693567653 | 0.8516768820993018 | 0.7555887085074848 | T | T | T |
| 0.3169868456377675 | 0.9511119364444153 | 0.7785829173430392 | T | T | T |
| 0.0905224058266818 | 0.9520167670301861 | 0.8090616064269167 | T | T | T |
| 0.4334500612921400 | 0.1272940049890059 | 0.5818322989434171 | T | T | T |
| 0.4124296240530109 | 0.9962059938687783 | 0.5740166771555103 | T | T | T |
| 0.3939740745252781 | 0.8640061534255949 | 0.5666166381716577 | T | T | T |
| 0.1976405213061643 | 0.1374061465318804 | 0.6182338740597532 | T | T | T |
| 0.1899734698973878 | 0.0051834886961068 | 0.5829498865955787 | T | T | T |
| 0.1946290557642950 | 0.8715476539286039 | 0.5640031552347202 | T | T | T |
| 0.9885311970469747 | 0.0381729528791543 | 0.7859682537232657 | T | T | T |
| 0.9859473231711906 | 0.8717996230545282 | 0.7835074481126633 | T | T | T |
| 0.1403028565872213 | 0.9309888342341498 | 0.2216572357083494 | T | T | T |
| 0.1836271067703435 | 0.9486719443748278 | 0.4059685052789055 | T | T | T |
| 0.2975078953499419 | 0.9478096921423078 | 0.5089344408911005 | T | T | T |
| 0.4074766636505934 | 0.9314964306131716 | 0.4015583706877874 | T | T | T |
| 0.3969735510282148 | 0.9351767149168170 | 0.2048614588711318 | T | T | T |
| 0.2702502915648532 | 0.9474960448896445 | 0.2578856166535198 | T | T | T |
| 0.1388374968266858 | 0.1723315426572319 | 0.2539904230594635 | T | T | T |
| 0.1951126474657146 | 0.1370932896209504 | 0.4224452993215802 | T | T | T |
| 0.3108256510871564 | 0.1473311795521272 | 0.5150996075341460 | T | T | T |
| 0.4138672632266045 | 0.1680541338073318 | 0.3943836879032335 | T | T | T |
| 0.3954287283161396 | 0.1581813248203907 | 0.1991895476926027 | T | T | T |
| 0.2706445346631868 | 0.1529443310111957 | 0.2620526963082701 | T | T | T |
| 0.1859705291558277 | 0.0496840956485000 | 0.2726828169254988 | T | T | T |
| 0.4160575422168101 | 0.0480741574162745 | 0.3076361604016896 | T | T | T |
| 0.0652577973215237 | 0.8712176076134287 | 0.0852933381080096 | T | T | T |
| 0.0858552240319766 | 0.0011746363454998 | 0.0701655330728712 | T | T | T |
| 0.1117349478309609 | 0.1318262656778507 | 0.0695281465555225 | T | T | T |

**Structure files (CONTCAR) involved in this work:**

|                    |                    |                    |   |   |   |
|--------------------|--------------------|--------------------|---|---|---|
| 0.3053595401556639 | 0.8623041753323084 | 0.1151344525698526 | T | T | T |
| 0.3128599999502006 | 0.9949057522060839 | 0.0824604291043776 | T | T | T |
| 0.2982330293316341 | 0.1281690605924342 | 0.0696437707347205 | T | T | T |
| 0.5134537476020198 | 0.9560439855945649 | 0.2878404390374772 | T | T | T |
| 0.5154062515164139 | 0.1343080152844038 | 0.2767626224197676 | T | T | T |
| 0.6372517058734564 | 0.5644722513224208 | 0.2716006750624362 | T | T | T |
| 0.7074013935195242 | 0.5708349589673792 | 0.1061473107409300 | T | T | T |
| 0.7981072096152271 | 0.5626628947808979 | 0.9591106139972759 | T | T | T |
| 0.8910455476864968 | 0.5779195822345421 | 0.1033021088887622 | T | T | T |
| 0.8873680265162822 | 0.5322117675622355 | 0.3109261927771871 | T | T | T |
| 0.7597668042382241 | 0.5183071207351195 | 0.2713931279547790 | T | T | T |
| 0.6389246291833549 | 0.3333381245715158 | 0.2583760374393886 | T | T | T |
| 0.6893711748537474 | 0.3373545099931641 | 0.0780050613719499 | T | T | T |
| 0.8094859603982035 | 0.3492985342047161 | 0.9942614869134306 | T | T | T |
| 0.9159204253967413 | 0.3186165515089333 | 0.1053926889585727 | T | T | T |
| 0.9048461186449730 | 0.3552336588411581 | 0.2954034874222929 | T | T | T |
| 0.7663866775858026 | 0.3672213888399382 | 0.2349457027868379 | T | T | T |
| 0.6680801389491922 | 0.4503432136426153 | 0.1762228484262262 | T | T | T |
| 0.9330515766652763 | 0.4464295782108951 | 0.1528666276213426 | T | T | T |
| 0.5704376415159654 | 0.6259752750412561 | 0.4149387791379996 | T | T | T |
| 0.5937258180719974 | 0.4963772835771006 | 0.4335909426333385 | T | T | T |
| 0.5888041219943057 | 0.3627053313910011 | 0.4390074702287368 | T | T | T |
| 0.8011787010496153 | 0.6281473147291208 | 0.3700925615360028 | T | T | T |
| 0.8042939897981198 | 0.5114535186781368 | 0.4611189041027403 | T | T | T |
| 0.8229114953620199 | 0.3806691191779454 | 0.4352731017856587 | T | T | T |
| 0.0224664518606547 | 0.3586243139008893 | 0.2137118758754672 | T | T | T |
| 0.8546297693483615 | 0.4351430022345346 | 0.7937656277944900 | T | T | T |
| 0.8010475033683623 | 0.4289711460757974 | 0.6143320274906900 | T | T | T |
| 0.7012820939545888 | 0.4264567676845929 | 0.4783366128213453 | T | T | T |
| 0.6007519580389750 | 0.4294043927368299 | 0.6068334858537618 | T | T | T |
| 0.6045608614657085 | 0.4439420265227372 | 0.8051771974065683 | T | T | T |
| 0.7289093127603986 | 0.4749724648258047 | 0.7650504224227698 | T | T | T |
| 0.8595508630918444 | 0.6799429879935853 | 0.7551707296364278 | T | T | T |
| 0.8152622243822287 | 0.6449737066413359 | 0.5637314222474464 | T | T | T |
| 0.6931270679583157 | 0.6469174898157328 | 0.4855576918065189 | T | T | T |
| 0.5872847059887660 | 0.6685938910280266 | 0.6011238176725038 | T | T | T |
| 0.5952349792681991 | 0.6587153414937276 | 0.7982390783193205 | T | T | T |
| 0.7201062262967406 | 0.6438049613493558 | 0.7389727480990114 | T | T | T |
| 0.8283553410238776 | 0.5477162016639222 | 0.6909421085380378 | T | T | T |
| 0.5816485818145882 | 0.5484381833940216 | 0.6850221973094278 | T | T | T |
| 0.9313228516162431 | 0.3763005057463862 | 0.9269194227533913 | T | T | T |
| 0.9165994105496624 | 0.5098015330068830 | 0.9344154935701666 | T | T | T |
| 0.9046808014250769 | 0.6421898868271175 | 0.9345842228979009 | T | T | T |
| 0.7007420885013205 | 0.3725671559085343 | 0.8870068876496422 | T | T | T |
| 0.6814407882402485 | 0.4995087821220430 | 0.9457405593464948 | T | T | T |
| 0.6875749244552306 | 0.6337898829582235 | 0.9348480144293749 | T | T | T |
| 0.4903661375519882 | 0.4513019525414385 | 0.7143311809503847 | T | T | T |
| 0.4809758310208287 | 0.6323278391248969 | 0.7069890740833090 | T | T | T |
| 0.6437294053589954 | 0.9384026493994251 | 0.2870126293818739 | T | T | T |
| 0.6998291250100158 | 0.9300401114577856 | 0.1094158148310211 | T | T | T |
| 0.8004536542148668 | 0.9435040429888034 | 0.9786803609468337 | T | T | T |
| 0.8986460479548823 | 0.9280767933881804 | 0.1120917298119504 | T | T | T |
| 0.8973051692317144 | 0.9482953819958958 | 0.3096359889689900 | T | T | T |

**Structure files (CONTCAR) involved in this work:**

|                    |                    |                    |   |   |   |
|--------------------|--------------------|--------------------|---|---|---|
| 0.7713428274158816 | 0.9676590633310147 | 0.2652982849601888 | T | T | T |
| 0.6419919059864055 | 0.1703525921068083 | 0.2556054674813451 | T | T | T |
| 0.6975520858035482 | 0.1585035529698403 | 0.0802976531404604 | T | T | T |
| 0.8099217709781295 | 0.1461499187005717 | 0.9771401283230347 | T | T | T |
| 0.9135720771150583 | 0.1682334711583047 | 0.0953500974294492 | T | T | T |
| 0.8974660473144132 | 0.1580573498863189 | 0.2922984264527692 | T | T | T |
| 0.7715051187309133 | 0.1388440362560376 | 0.2431710432345599 | T | T | T |
| 0.6788914727516854 | 0.0500330944749689 | 0.1922528818868598 | T | T | T |
| 0.9184694278922304 | 0.0491331254142785 | 0.1813661739688918 | T | T | T |
| 0.5702166556644206 | 0.8743202569715011 | 0.4196135933012923 | T | T | T |
| 0.5840957592539626 | 0.0058234447986376 | 0.4375402428449335 | T | T | T |
| 0.5964371746316888 | 0.1384279682828510 | 0.4366019030944276 | T | T | T |
| 0.8081653530780442 | 0.8700155234051284 | 0.3932339353981296 | T | T | T |
| 0.8153229018156257 | 0.9976592576778113 | 0.4477956023792331 | T | T | T |
| 0.8091880746571440 | 0.1318949355716406 | 0.4344810375871287 | T | T | T |
| 0.0102710382212321 | 0.9539416099815800 | 0.2162028469391884 | T | T | T |
| 0.0159927403702404 | 0.1366268183588822 | 0.2112270104582969 | T | T | T |
| 0.8580030819344722 | 0.0544972022184180 | 0.7847919895359942 | T | T | T |
| 0.8010824111923102 | 0.0718750848054195 | 0.6090060634158886 | T | T | T |
| 0.7009282866233888 | 0.0602675660274651 | 0.4775887398046178 | T | T | T |
| 0.6001800470284778 | 0.0738673270848061 | 0.6073322862695438 | T | T | T |
| 0.6034338915044373 | 0.0502424033878286 | 0.8046235943694693 | T | T | T |
| 0.7292359831258273 | 0.0287973243067980 | 0.7623215313718132 | T | T | T |
| 0.8600809206239731 | 0.8349281049023944 | 0.7631641804834303 | T | T | T |
| 0.8060613354477482 | 0.8322580273850095 | 0.5860570744212302 | T | T | T |
| 0.6932018524272261 | 0.8507017032829999 | 0.4859259870853116 | T | T | T |
| 0.5887388975921318 | 0.8279826474884585 | 0.6041645499011351 | T | T | T |
| 0.6031459725541751 | 0.8503987391353499 | 0.7984850843038654 | T | T | T |
| 0.7297329688024580 | 0.8573236527261244 | 0.7445068200116642 | T | T | T |
| 0.8178003637656511 | 0.9481549562419940 | 0.6802112120194698 | T | T | T |
| 0.5790876684355389 | 0.9517332392403942 | 0.6730748164173326 | T | T | T |
| 0.9325274427947475 | 0.1258728420951916 | 0.9084015160579983 | T | T | T |
| 0.9184599981212664 | 0.9958995749136097 | 0.9421998561878843 | T | T | T |
| 0.9051957614809705 | 0.8631957831551627 | 0.9436181959446839 | T | T | T |
| 0.6938404817249667 | 0.1283328404131335 | 0.8865704315617494 | T | T | T |
| 0.6838052315161101 | 0.0011992339044057 | 0.9448955677495825 | T | T | T |
| 0.6957638824950898 | 0.8670093077701099 | 0.9376674773600527 | T | T | T |
| 0.4895963583648803 | 0.0473490062717012 | 0.7144513522603182 | T | T | T |
| 0.4841792344857423 | 0.8626360998315167 | 0.7153185150298995 | T | T | T |
| 0.3599330441896439 | 0.4311434108381987 | 0.7228222409599868 | T | T | T |
| 0.3112801796082904 | 0.4457368427424555 | 0.9058943993891396 | T | T | T |
| 0.1989056964724129 | 0.4595891554973033 | 0.0135036398439975 | T | T | T |
| 0.0896893722970905 | 0.4351185729637446 | 0.9058306055019745 | T | T | T |
| 0.1022188308822500 | 0.4333087021631183 | 0.7084927049932029 | T | T | T |
| 0.2294062129272954 | 0.4506192462989208 | 0.7542563274657619 | T | T | T |
| 0.3604991234175263 | 0.6739253347016098 | 0.7556953198197043 | T | T | T |
| 0.3038328656565494 | 0.6379850908205583 | 0.9235683929637297 | T | T | T |
| 0.1886444539895923 | 0.6462255091008102 | 0.0170156918783238 | T | T | T |
| 0.0861196379045372 | 0.6667298564295812 | 0.8941299849368807 | T | T | T |
| 0.1045825534321771 | 0.6579972519317929 | 0.6990717457962113 | T | T | T |
| 0.2294762493969147 | 0.6508842420842674 | 0.7603180795530688 | T | T | T |
| 0.3163261068284081 | 0.5497989759249515 | 0.7769538114427839 | T | T | T |
| 0.0812467115996997 | 0.5481469924584410 | 0.8051884753223927 | T | T | T |



**Structure files (CONTCAR) involved in this work:**

|                     |                    |                    |   |   |   |
|---------------------|--------------------|--------------------|---|---|---|
| 0.4318622024970789  | 0.3750355774403955 | 0.5780954825923349 | T | T | T |
| 0.4144205842965227  | 0.5064062582606249 | 0.5762278160311879 | T | T | T |
| 0.3837173284839861  | 0.6363889222700415 | 0.5691005019068017 | T | T | T |
| 0.1934922008083695  | 0.3618821183323719 | 0.6163457183670769 | T | T | T |
| 0.1817119639850821  | 0.4939141967621047 | 0.5797452492761666 | T | T | T |
| 0.1995432272618773  | 0.6272570930823814 | 0.5679312426702680 | T | T | T |
| 0.9848405214252794  | 0.4542903885499242 | 0.7876396173250491 | T | T | T |
| 0.9840819785206629  | 0.6375117117147641 | 0.7744083775810477 | T | T | T |
| 0.1434394493051034  | 0.5686581838105303 | 0.2201918738171527 | T | T | T |
| 0.1832961485904858  | 0.5537748565611419 | 0.4057530239067795 | T | T | T |
| 0.2955082240135499  | 0.5430706992419192 | 0.5117887824987305 | T | T | T |
| 0.4034118328233662  | 0.5700895650418081 | 0.4033720130006577 | T | T | T |
| 0.3964619365459633  | 0.5648891668208006 | 0.2060414199281329 | T | T | T |
| 0.2715405565479729  | 0.5467270211354744 | 0.2593319077807126 | T | T | T |
| 0.1457704466613637  | 0.3224100420911371 | 0.2469011993689986 | T | T | T |
| 0.1936586444440508  | 0.3595023646115910 | 0.4213173153609104 | T | T | T |
| 0.3085344965499925  | 0.3529809693359423 | 0.5181794364602986 | T | T | T |
| 0.4087558971056584  | 0.3310994563548346 | 0.3917476049914667 | T | T | T |
| 0.3949203715202994  | 0.3455121679921982 | 0.1943744624596405 | T | T | T |
| 0.2734008457284198  | 0.3515935193682294 | 0.2629398903894704 | T | T | T |
| 0.1814631263654942  | 0.4489498500694932 | 0.2775434208039143 | T | T | T |
| 0.4112542212827562  | 0.4521819916729479 | 0.3122886229929711 | T | T | T |
| 0.0666488560836377  | 0.6255673009590803 | 0.0813804092078997 | T | T | T |
| 0.0790772073910595  | 0.4920678764541405 | 0.0845560808736217 | T | T | T |
| 0.1125199429159070  | 0.3636488430050884 | 0.0650717857476406 | T | T | T |
| 0.3017001592490181  | 0.6368197959913284 | 0.1198551782882617 | T | T | T |
| 0.3133986202412224  | 0.5054886371433427 | 0.0804443643260868 | T | T | T |
| 0.2940253595885750  | 0.3727558908265750 | 0.0679965373141029 | T | T | T |
| 0.5102825043116044  | 0.5402743451070275 | 0.2935423417176889 | T | T | T |
| 0.5117626421981047  | 0.3661137296161429 | 0.2776724683929920 | T | T | T |
| 0.4357946925922148  | 0.7491412892456004 | 0.6380557673375170 | T | T | T |
| 0.1920615887765068  | 0.7499250121598009 | 0.6374518517898881 | T | T | T |
| 0.2740022873166830  | 0.7492194845630121 | 0.0251232001337880 | T | T | T |
| 0.1057665892666516  | 0.7489809830738129 | 0.0471119849175531 | T | T | T |
| 0.0685509862952381  | 0.2475154368859284 | 0.1302251530843608 | T | T | T |
| 0.3079224255131126  | 0.2510068180441088 | 0.1385622160569681 | T | T | T |
| 0.2240503807931851  | 0.2492086885811865 | 0.5227400755300342 | T | T | T |
| 0.3927417747112094  | 0.2506395657303605 | 0.5459564531693906 | T | T | T |
| 0.5570357285891563  | 0.2500496941005251 | 0.3512321014340833 | T | T | T |
| 0.8066296025480958  | 0.2495452806655024 | 0.3445341273576245 | T | T | T |
| 0.7277088076564566  | 0.2492748496400489 | 0.9411030406589496 | T | T | T |
| 0.8920004668055296  | 0.2495270982193688 | 0.9423526148337386 | T | T | T |
| 0.9476545748400171  | 0.7540072555596835 | 0.8540914048622981 | T | T | T |
| 0.6861165808299691  | 0.7510353505972833 | 0.8480581187069209 | T | T | T |
| 0.7758841821888621  | 0.7476775573835966 | 0.4430577573502527 | T | T | T |
| 0.6103509045786262  | 0.7494825512890728 | 0.4486967674522566 | T | T | T |
| 0.9628536047020033  | 0.5383825960227474 | 0.5170261305081971 | T | T | T |
| 0.9280094204127544  | 0.4135924257351145 | 0.4132822507479008 | T | T | T |
| 0.8794886330928242  | 0.5621533396901411 | 0.5614078663355951 | T | T | T |
| 0.0496465517347801  | 0.6627804728524740 | 0.5094756225493242 | T | T | T |
| 0.0337727443232807  | 0.4714050099009484 | 0.4702927296282091 | T | T | T |
| -0.0127208759459282 | 0.4434120655346269 | 0.5754082887590364 | T | T | T |
| -0.0040017566103006 | 0.5791534584107906 | 0.3794555027290611 | T | T | T |

**Structure files (CONTCAR) involved in this work:**

|                     |                    |                    |   |   |   |
|---------------------|--------------------|--------------------|---|---|---|
| 0.9790122125589270  | 0.6478113232671533 | 0.2943068659589664 | T | T | T |
| 0.0638904237157549  | 0.6239906827405065 | 0.3211348616598083 | T | T | T |
| 0.0618261751983786  | 0.6928884661147753 | 0.4807091159789444 | T | T | T |
| -0.0167235746620892 | 0.4707163303839845 | 0.5038750275815626 | T | T | T |
| 0.0126332398324275  | 0.6060117294465684 | 0.3122368901647176 | T | T | T |

**Figure S12(b) IS**

Si Al O Zn H C

1.0000000000000000

20.0219999999999985 0.0000000000000000 0.0000000000000000

0.0000000000000000 19.8990000000000009 0.0000000000000000

0.0000000000000000 0.0000000000000000 13.3829999999999991

93 3 193 2 7 2

## Selective dynamics

Direct

|                    |                    |                    |   |   |   |
|--------------------|--------------------|--------------------|---|---|---|
| 0.4222067175631574 | 0.0602533794655352 | 0.6483057002513969 | T | T | T |
| 0.3049194054487585 | 0.0320196651881667 | 0.7923139190313880 | T | T | T |
| 0.2820111566058360 | 0.0564380017233989 | 0.0169412806390379 | T | T | T |
| 0.1226593436530254 | 0.0622794242341283 | 0.0115847650518041 | T | T | T |
| 0.0678555588360534 | 0.0313746096418582 | 0.8004515024649252 | T | T | T |
| 0.1802768422558360 | 0.0647350103349935 | 0.6647362852250699 | T | T | T |
| 0.4184716993746637 | 0.8274208800564982 | 0.6688622981400412 | T | T | T |
| 0.3008164388820078 | 0.8730342137516161 | 0.8011233884922979 | T | T | T |
| 0.2668551518103774 | 0.8303557916462204 | 0.0204160664997467 | T | T | T |
| 0.1109210763363140 | 0.8265823546277674 | 0.0131555578574450 | T | T | T |
| 0.0660723767465495 | 0.8747830469223347 | 0.7987999398880240 | T | T | T |
| 0.1791164908128816 | 0.8289393591589982 | 0.6650858617615530 | T | T | T |
| 0.0754798738540452 | 0.9408990725152949 | 0.1487362697017846 | T | T | T |
| 0.1945769891542780 | 0.9700031639585456 | 0.2903714239817343 | T | T | T |
| 0.2165073939849809 | 0.9435689460208929 | 0.5160059994155543 | T | T | T |
| 0.3768714988356281 | 0.9355951450606741 | 0.5135720772921690 | T | T | T |
| 0.4331598926523171 | 0.9687570027030412 | 0.3014359615934468 | T | T | T |
| 0.3200153388722137 | 0.9356225470731749 | 0.1642583255118815 | T | T | T |
| 0.0817062361875334 | 0.1723101121846436 | 0.1665924326307036 | T | T | T |
| 0.1977067775430061 | 0.1287225033467225 | 0.3017866244853402 | T | T | T |
| 0.2314314437537468 | 0.1694066256382821 | 0.5191445012075137 | T | T | T |
| 0.3868776802445141 | 0.1738835126396178 | 0.5088888819987962 | T | T | T |
| 0.4347948207539715 | 0.1271513229079912 | 0.2955411276149876 | T | T | T |
| 0.3183416828671587 | 0.1724157476464499 | 0.1665661574124447 | T | T | T |
| 0.5780928075841857 | 0.5556818837067566 | 0.3563941200628010 | T | T | T |
| 0.6906781535892274 | 0.5274202976998063 | 0.2035119606534775 | T | T | T |
| 0.7157943517034024 | 0.5684601612788691 | 0.9870052970530165 | T | T | T |
| 0.8747407782785186 | 0.5735570389041030 | 0.9866723241268304 | T | T | T |
| 0.8114981521000315 | 0.5514854980222323 | 0.3457711076131131 | T | T | T |
| 0.5729325474488974 | 0.3293441528687356 | 0.3328414747455128 | T | T | T |
| 0.6935938216582115 | 0.3735531470176158 | 0.1946276803067736 | T | T | T |
| 0.7319639054591807 | 0.3280152962382016 | 0.9802536562596164 | T | T | T |
| 0.8869488558896290 | 0.3254195584271908 | 0.9888858317855836 | T | T | T |
| 0.9423064756849563 | 0.3719715712821995 | 0.1881554369793852 | T | T | T |
| 0.9202988600005245 | 0.4466265262020760 | 0.8599995100829678 | T | T | T |
| 0.7998376700967638 | 0.4746363608910410 | 0.7203450673537209 | T | T | T |
| 0.7795654065543145 | 0.4371812818127015 | 0.4962023723329531 | T | T | T |
| 0.6220819224696574 | 0.4288389104982129 | 0.4902946601778969 | T | T | T |
| 0.5701756915829610 | 0.4693690971790422 | 0.7021163330224420 | T | T | T |

**Structure files (CONTCAR) involved in this work:**

|                    |                    |                    |   |   |   |
|--------------------|--------------------|--------------------|---|---|---|
| 0.6760334851530608 | 0.4477350491715867 | 0.8572698551355867 | T | T | T |
| 0.9206490658948759 | 0.6790561635065542 | 0.8297774645631726 | T | T | T |
| 0.7672563458492908 | 0.6704768766663681 | 0.4649875127868227 | T | T | T |
| 0.6125146642382084 | 0.6735802189961895 | 0.4882848346241643 | T | T | T |
| 0.5601051998105446 | 0.6277283323416871 | 0.6990176216013091 | T | T | T |
| 0.6710610833790533 | 0.6748701001543861 | 0.8294103908813021 | T | T | T |
| 0.5776024199572557 | 0.9458077027835238 | 0.3581603309536684 | T | T | T |
| 0.6981664616598516 | 0.9748372830144058 | 0.2154518250354783 | T | T | T |
| 0.7192969399033059 | 0.9390489068782201 | 0.9934783252260251 | T | T | T |
| 0.8792246478619974 | 0.9347236721152464 | 0.9949028970255861 | T | T | T |
| 0.9308364313244432 | 0.9719012437796146 | 0.2051091900400352 | T | T | T |
| 0.8221440693665535 | 0.9471072957352346 | 0.3549702544220709 | T | T | T |
| 0.5776817385174376 | 0.1744088142276372 | 0.3297086769005257 | T | T | T |
| 0.6974342737596839 | 0.1330522044919646 | 0.1938231748555559 | T | T | T |
| 0.7323119789852895 | 0.1717624327779996 | 0.9721999282587738 | T | T | T |
| 0.8869222966478209 | 0.1735506415737052 | 0.9819488761424030 | T | T | T |
| 0.9347694376494468 | 0.1303905673186885 | 0.1974820439903701 | T | T | T |
| 0.8192414876170951 | 0.1752727694522518 | 0.3321145018086580 | T | T | T |
| 0.9231913309710531 | 0.0540398316626656 | 0.8554683548126937 | T | T | T |
| 0.8015090724046787 | 0.0261136104612232 | 0.7098271521640240 | T | T | T |
| 0.7809121000606102 | 0.0661443145990738 | 0.4921184782096636 | T | T | T |
| 0.6206822313667101 | 0.0701742488205254 | 0.4900057180223962 | T | T | T |
| 0.5676295369262204 | 0.0327234750100606 | 0.6988974928608588 | T | T | T |
| 0.6781348615172732 | 0.0544346367472568 | 0.8494687243394322 | T | T | T |
| 0.9233533971558388 | 0.8312674304534857 | 0.8372139823721455 | T | T | T |
| 0.8024317310410151 | 0.8685758795216637 | 0.6955505111764402 | T | T | T |
| 0.7687360530657464 | 0.8275433648697681 | 0.4779236488763970 | T | T | T |
| 0.6138449362933338 | 0.8273415341693384 | 0.4901756038784644 | T | T | T |
| 0.5632180506450861 | 0.8755434598390062 | 0.6981787360655297 | T | T | T |
| 0.6779219094079896 | 0.8333514068260038 | 0.8340604875893550 | T | T | T |
| 0.4234238645933638 | 0.4419376307391308 | 0.6452257599939152 | T | T | T |
| 0.3049229124806316 | 0.4694230006556326 | 0.7884723277160987 | T | T | T |
| 0.2795405473627597 | 0.4455733467388659 | 0.0150560462272199 | T | T | T |
| 0.1216926927790067 | 0.4375696999235209 | 0.0154337693874267 | T | T | T |
| 0.0641757239161369 | 0.4700738036590759 | 0.8021843006386733 | T | T | T |
| 0.1771829877658224 | 0.4362703130670341 | 0.6625078097895825 | T | T | T |
| 0.4150382498790786 | 0.6735914407980577 | 0.6665146346976567 | T | T | T |
| 0.3003927755156314 | 0.6278684463408438 | 0.8007477398255406 | T | T | T |
| 0.2668960574356557 | 0.6690118817338051 | 0.0197193451773274 | T | T | T |
| 0.1114185059151549 | 0.6728766666975176 | 0.0085534756879274 | T | T | T |
| 0.0627819410052662 | 0.6287662398367145 | 0.7941566217086944 | T | T | T |
| 0.1793869608988084 | 0.6717531567629333 | 0.6641842997317341 | T | T | T |
| 0.0781445980475199 | 0.5592278163213533 | 0.1487745880084385 | T | T | T |
| 0.1964358668024521 | 0.5288700671432361 | 0.2895798939890176 | T | T | T |
| 0.2145271843820749 | 0.5561174169155866 | 0.5156225779774161 | T | T | T |
| 0.3734787364824140 | 0.5655410761385702 | 0.5142201040843191 | T | T | T |
| 0.4299995576900916 | 0.5308920738265200 | 0.3045430192237456 | T | T | T |
| 0.3215517960734680 | 0.5634187402272594 | 0.1626533059861502 | T | T | T |
| 0.0866488089716589 | 0.3244812566890094 | 0.1610526149959561 | T | T | T |
| 0.1984192575145597 | 0.3707629948606999 | 0.3004436559811411 | T | T | T |
| 0.2299620512345812 | 0.3307156802277611 | 0.5192432399185984 | T | T | T |
| 0.3847066707278354 | 0.3278372372373979 | 0.5066230176529294 | T | T | T |
| 0.4300272620938265 | 0.3740553040629229 | 0.2935660404918913 | T | T | T |

**Structure files (CONTCAR) involved in this work:**

|                    |                    |                    |   |   |   |
|--------------------|--------------------|--------------------|---|---|---|
| 0.3168819475194928 | 0.3298299340082491 | 0.1628974073635915 | T | T | T |
| 0.9225895109860800 | 0.5278998117385618 | 0.1950008440390011 | T | T | T |
| 0.8228901266860480 | 0.3358286502177132 | 0.3273536245499019 | T | T | T |
| 0.7972581625296269 | 0.6384834678111621 | 0.6970343731501436 | T | T | T |
| 0.0112049084016119 | 0.5565396085749823 | 0.2274097297317550 | T | T | T |
| 0.3584512299702654 | 0.0706007541492670 | 0.7217631422492073 | T | T | T |
| 0.3165120160488584 | 0.0547830801799931 | 0.9072094489637229 | T | T | T |
| 0.2019819215174627 | 0.0468064107737051 | 0.0066212571364699 | T | T | T |
| 0.0922814217241209 | 0.0704411040720530 | 0.9003230368092235 | T | T | T |
| 0.1035044071602485 | 0.0645656029083600 | 0.7032966510901322 | T | T | T |
| 0.2292411261558119 | 0.0518088052794697 | 0.7599629288962826 | T | T | T |
| 0.3595175909216841 | 0.8279435843581031 | 0.7521014032302238 | T | T | T |
| 0.3007064089529471 | 0.8609565553051783 | 0.9204384565207011 | T | T | T |
| 0.1882519222739611 | 0.8508967128970676 | 0.0234681420553443 | T | T | T |
| 0.0878702248595417 | 0.8327998004551154 | 0.8977057347386639 | T | T | T |
| 0.1024040540351406 | 0.8410595025989089 | 0.7018594433188700 | T | T | T |
| 0.2285648856649031 | 0.8510648564207579 | 0.7560775272811850 | T | T | T |
| 0.3157846821070509 | 0.9515627396984901 | 0.7772617533606165 | T | T | T |
| 0.0895504942924561 | 0.9525966503293062 | 0.8098272093983404 | T | T | T |
| 0.4325899213026571 | 0.1277531339916678 | 0.5816361471908993 | T | T | T |
| 0.4119130362906415 | 0.9965926413130136 | 0.5741477124891058 | T | T | T |
| 0.3929599458716683 | 0.8645151073670186 | 0.5677995627507476 | T | T | T |
| 0.1961366880238633 | 0.1380580056693732 | 0.6174251745524639 | T | T | T |
| 0.1897201725616989 | 0.0059478006954262 | 0.5822327615398869 | T | T | T |
| 0.1942712304974952 | 0.8722997899136129 | 0.5650477406931561 | T | T | T |
| 0.9878607290415395 | 0.0391709658584004 | 0.7856550587185326 | T | T | T |
| 0.9854925995323855 | 0.8716016292895123 | 0.7854714418552955 | T | T | T |
| 0.1398525385875929 | 0.9318919905682077 | 0.2213515389146470 | T | T | T |
| 0.1831685646233294 | 0.9486161988068584 | 0.4058393307024862 | T | T | T |
| 0.2970562588040976 | 0.9481251855233945 | 0.5085497615573328 | T | T | T |
| 0.4073187109253275 | 0.9315317713732608 | 0.4020016882674705 | T | T | T |
| 0.3962420696666720 | 0.9358866633019201 | 0.2050522561736327 | T | T | T |
| 0.2697433234177550 | 0.9483835011598031 | 0.2580432823032197 | T | T | T |
| 0.1389026096455500 | 0.1733249872219669 | 0.2524947636905587 | T | T | T |
| 0.1946401229823603 | 0.1384085524060207 | 0.4216061323712266 | T | T | T |
| 0.3098061030683783 | 0.1481582900509106 | 0.5159616583782445 | T | T | T |
| 0.4126851658214091 | 0.1685789597157328 | 0.3946390352288368 | T | T | T |
| 0.3954632842075185 | 0.1584092532952780 | 0.1994466254611502 | T | T | T |
| 0.2704437516868033 | 0.1530516481049105 | 0.2610361640872415 | T | T | T |
| 0.1851453428406377 | 0.0503774447039059 | 0.2734504180539941 | T | T | T |
| 0.4151958391529380 | 0.0484189722757747 | 0.3088767682897626 | T | T | T |
| 0.0644000026913287 | 0.8715053216821195 | 0.0864201663966616 | T | T | T |
| 0.0854136195423936 | 0.0009673646593417 | 0.0683402599034568 | T | T | T |
| 0.1088640619772981 | 0.1319116161576198 | 0.0698222601353748 | T | T | T |
| 0.3048742160164893 | 0.8622453121132300 | 0.1160885835393123 | T | T | T |
| 0.3116446560225526 | 0.9945541166420159 | 0.0816712798863749 | T | T | T |
| 0.2991586134834312 | 0.1279999267904193 | 0.0690831551061758 | T | T | T |
| 0.5127533841462274 | 0.9569006281738307 | 0.2872312028541955 | T | T | T |
| 0.5148707489184614 | 0.1346007574867171 | 0.2790325579774084 | T | T | T |
| 0.6368838755521570 | 0.5647626953144489 | 0.2748334537735925 | T | T | T |
| 0.7013570425307105 | 0.5743824704421394 | 0.1060388769640290 | T | T | T |
| 0.7952584749753905 | 0.5614926852869435 | 0.9637377537728578 | T | T | T |
| 0.8908671057672815 | 0.5793156141512295 | 0.1038002973065789 | T | T | T |

**Structure files (CONTCAR) involved in this work:**

|                    |                     |                    |   |   |   |
|--------------------|---------------------|--------------------|---|---|---|
| 0.8869079487552028 | 0.5366515500071510  | 0.3128697282113228 | T | T | T |
| 0.7608869466192655 | 0.5224031133150870  | 0.2639385938312668 | T | T | T |
| 0.6375001873684140 | 0.3357051647875808  | 0.2621420478283992 | T | T | T |
| 0.6939393579754677 | 0.3361298225073850  | 0.0862293990150205 | T | T | T |
| 0.8097363895161124 | 0.3515989422802708  | 0.9905333132964393 | T | T | T |
| 0.9165262013812602 | 0.3205590967176434  | 0.1012187523857533 | T | T | T |
| 0.9055095066998963 | 0.3534734036586053  | 0.2922815464811115 | T | T | T |
| 0.7650628613841262 | 0.3710345996028631  | 0.2477041389322482 | T | T | T |
| 0.6682839405640553 | 0.4513380724094970  | 0.1766728086054243 | T | T | T |
| 0.9295899449652467 | 0.4477680702841270  | 0.1528134582714910 | T | T | T |
| 0.5677368982690300 | 0.6262448362485481  | 0.4155806061773575 | T | T | T |
| 0.5963839782489435 | 0.4975542211556228  | 0.4374179527718018 | T | T | T |
| 0.5856141893295724 | 0.3640342044683323  | 0.4418178456458359 | T | T | T |
| 0.7991283712684335 | 0.6310756812157875  | 0.3692610812042606 | T | T | T |
| 0.7972065306617411 | 0.5151606699857350  | 0.4574564148054012 | T | T | T |
| 0.8314932436632967 | 0.3869494264912477  | 0.4401366724279813 | T | T | T |
| 0.0224344601872861 | 0.3624069395880495  | 0.2059054293685959 | T | T | T |
| 0.8546783063182812 | 0.4376255666678728  | 0.7894739682928001 | T | T | T |
| 0.7954212894409172 | 0.43444404558527324 | 0.6144721900239610 | T | T | T |
| 0.7025002623200038 | 0.4207752941274136  | 0.4714611718560971 | T | T | T |
| 0.6064457417920454 | 0.4310428427114242  | 0.6089618698153971 | T | T | T |
| 0.6023658272178970 | 0.4442850412114339  | 0.8069591925305750 | T | T | T |
| 0.7272011099878920 | 0.4748455827108125  | 0.7714741445656839 | T | T | T |
| 0.8598278513279287 | 0.6826783063750678  | 0.7529873004241380 | T | T | T |
| 0.8115678192607443 | 0.6479499041628245  | 0.5637137937402770 | T | T | T |
| 0.6902192207125756 | 0.6480296360872885  | 0.4842846679754910 | T | T | T |
| 0.5848224664848177 | 0.6692800976065509  | 0.6013545186010089 | T | T | T |
| 0.5929434951485140 | 0.6608807574463619  | 0.7985358884099277 | T | T | T |
| 0.7177239191676330 | 0.6512852789399116  | 0.7377354867491868 | T | T | T |
| 0.8228929805241760 | 0.5517693359978112  | 0.6950285141530045 | T | T | T |
| 0.5816045577576039 | 0.5494866810003929  | 0.6868637086938224 | T | T | T |
| 0.9310713785675999 | 0.3772173594998633  | 0.9216827022990826 | T | T | T |
| 0.9142848862544829 | 0.5105567384528031  | 0.9340704277356554 | T | T | T |
| 0.9000231567233020 | 0.6425002818322714  | 0.9337757357255769 | T | T | T |
| 0.6961658475675143 | 0.3733332934601736  | 0.8947678987068587 | T | T | T |
| 0.6770665488956239 | 0.5010643258162696  | 0.9487511582589642 | T | T | T |
| 0.6867266514565048 | 0.6348457762660796  | 0.9328463028419786 | T | T | T |
| 0.4913479951815010 | 0.4512241620400507  | 0.7090197709429298 | T | T | T |
| 0.4791639194208189 | 0.6320786180813578  | 0.7077414454459436 | T | T | T |
| 0.6435040885816751 | 0.9404479230616773  | 0.2886154270799631 | T | T | T |
| 0.6986518167413052 | 0.9341869031744829  | 0.1103529336971363 | T | T | T |
| 0.7996864273729370 | 0.9469033909860302  | 0.9802709357590371 | T | T | T |
| 0.8984106548345838 | 0.9301690529611607  | 0.1123846681468613 | T | T | T |
| 0.8973728022581340 | 0.9482670049257638  | 0.3098487811932633 | T | T | T |
| 0.7715368904120155 | 0.9690212414656735  | 0.2659514251682857 | T | T | T |
| 0.6396320599828678 | 0.1743679794004454  | 0.2522634860738647 | T | T | T |
| 0.6963855238274453 | 0.1577013031948968  | 0.0785908459237359 | T | T | T |
| 0.8098723926284185 | 0.1472158417005248  | 0.9782285500548485 | T | T | T |
| 0.9134918425876485 | 0.1695160656178148  | 0.0960208036493989 | T | T | T |
| 0.8957758954339550 | 0.1607715089942107  | 0.2935394966464439 | T | T | T |
| 0.7698907247773612 | 0.1468816398126059  | 0.2435931097465190 | T | T | T |
| 0.6795400737985364 | 0.0533049197020831  | 0.1984867393449446 | T | T | T |
| 0.9176269574515394 | 0.0510732240027534  | 0.1845950113773802 | T | T | T |

**Structure files (CONTCAR) involved in this work:**

|                    |                    |                    |   |   |   |
|--------------------|--------------------|--------------------|---|---|---|
| 0.5688391978791943 | 0.8758098934272294 | 0.4197961662745883 | T | T | T |
| 0.5820045174312211 | 0.0074898796894561 | 0.4376018538544323 | T | T | T |
| 0.5993489081311911 | 0.1396026193608406 | 0.4348675320566027 | T | T | T |
| 0.8070518767010267 | 0.8713560882258322 | 0.3939378965586823 | T | T | T |
| 0.8164076214533907 | 0.9987243799948349 | 0.4482647875990468 | T | T | T |
| 0.8064422865032124 | 0.1324848249381658 | 0.4344793972942948 | T | T | T |
| 0.0100942467124538 | 0.9558822381637380 | 0.2161097317617783 | T | T | T |
| 0.0149277766958712 | 0.1389500932974848 | 0.2140943232595085 | T | T | T |
| 0.8572755165440437 | 0.0551954845691989 | 0.7857346410886460 | T | T | T |
| 0.8010750616934571 | 0.0720159963728086 | 0.6095298390245374 | T | T | T |
| 0.7004090611989461 | 0.0576913420976432 | 0.4798548482656846 | T | T | T |
| 0.5987265441712430 | 0.0759968542313229 | 0.6065880967103754 | T | T | T |
| 0.6031137076931805 | 0.0526417416401435 | 0.8037198253335426 | T | T | T |
| 0.7285683913533619 | 0.0291001796566763 | 0.7622149218396792 | T | T | T |
| 0.8601544162804180 | 0.8343886219955555 | 0.7623462928496789 | T | T | T |
| 0.8044076002442657 | 0.8330948578587107 | 0.5863534975005655 | T | T | T |
| 0.6914092090038745 | 0.8522138577135591 | 0.4860338487393776 | T | T | T |
| 0.5877225634658207 | 0.8295166603761764 | 0.6048033913636078 | T | T | T |
| 0.6025458572463297 | 0.8534346810890563 | 0.7990150171683496 | T | T | T |
| 0.7296538239384558 | 0.8565024065791165 | 0.7463116873607701 | T | T | T |
| 0.8173801054631926 | 0.9482429624271010 | 0.6822841242976067 | T | T | T |
| 0.5785809293144875 | 0.9536833378075360 | 0.6724050685386207 | T | T | T |
| 0.9322770464046417 | 0.1267409524145089 | 0.9091638414599669 | T | T | T |
| 0.9186504796519733 | 0.9967627077753095 | 0.9421406888332254 | T | T | T |
| 0.9026178146622976 | 0.8645705454554631 | 0.9437796477709164 | T | T | T |
| 0.6947815509552604 | 0.1306528583174445 | 0.8838712772664247 | T | T | T |
| 0.6828905746878743 | 0.0046195907535887 | 0.9455079048219123 | T | T | T |
| 0.6950508577101946 | 0.8707629106356986 | 0.9385977474159184 | T | T | T |
| 0.4887531703211859 | 0.0485418095612376 | 0.7147042956791014 | T | T | T |
| 0.4836037675905384 | 0.8645959750055019 | 0.7157703934274960 | T | T | T |
| 0.3606922969940163 | 0.4312996630855604 | 0.7211089940151644 | T | T | T |
| 0.3117714967779857 | 0.4458060660284421 | 0.9038888887893387 | T | T | T |
| 0.1994465272283259 | 0.4611778597530318 | 0.0110081671371573 | T | T | T |
| 0.0897032060103893 | 0.4355139546057970 | 0.9049067514933714 | T | T | T |
| 0.1017771360700216 | 0.4358946192684839 | 0.7073298124888673 | T | T | T |
| 0.2297022440033779 | 0.4508003256780722 | 0.7524141397896039 | T | T | T |
| 0.3579007793623163 | 0.6748378332624854 | 0.7527025474853833 | T | T | T |
| 0.3013062240784107 | 0.6380252189215748 | 0.9204625637853331 | T | T | T |
| 0.1883167633773207 | 0.6477004038910510 | 0.0195438463741543 | T | T | T |
| 0.0872561331062016 | 0.6684536393946988 | 0.8937650745541723 | T | T | T |
| 0.1021483818875490 | 0.6589427581044951 | 0.6974389379716516 | T | T | T |
| 0.2274647494813313 | 0.6487239177936945 | 0.7565163582551047 | T | T | T |
| 0.3166386891914610 | 0.5498301365394155 | 0.7748398736974514 | T | T | T |
| 0.0815761662269610 | 0.5497515100187397 | 0.8062077998284911 | T | T | T |
| 0.4318294361340020 | 0.3761894867372037 | 0.5741611499294447 | T | T | T |
| 0.4134507475527009 | 0.5076394232547993 | 0.5747508074539833 | T | T | T |
| 0.3843035127919087 | 0.6382004918103801 | 0.5668341167183976 | T | T | T |
| 0.1919327934973334 | 0.3628458416755067 | 0.6149417100358707 | T | T | T |
| 0.1814064943960692 | 0.4951116196104252 | 0.5785286800751116 | T | T | T |
| 0.1956842226193161 | 0.6284682644213493 | 0.5639814020552577 | T | T | T |
| 0.9846421527531984 | 0.4578644007522212 | 0.7864585567336304 | T | T | T |
| 0.9832457427761120 | 0.6381079682698377 | 0.7775562684733390 | T | T | T |
| 0.1434108347441233 | 0.5690378176658388 | 0.2182908252866828 | T | T | T |

**Structure files (CONTCAR) involved in this work:**

|                    |                    |                    |   |   |   |
|--------------------|--------------------|--------------------|---|---|---|
| 0.1834279971037967 | 0.5537944590660564 | 0.4031755594666538 | T | T | T |
| 0.2947102391960974 | 0.5459682753645300 | 0.5119697613556640 | T | T | T |
| 0.4022624237324258 | 0.5709045698338744 | 0.4016508863275005 | T | T | T |
| 0.3975119124227846 | 0.5645525760267922 | 0.2047921889748404 | T | T | T |
| 0.2718495574248556 | 0.5475547539980830 | 0.2566275205662326 | T | T | T |
| 0.1439733049362067 | 0.3231536143753839 | 0.2469061019232127 | T | T | T |
| 0.1948096228217485 | 0.3605269623812077 | 0.4197071398194872 | T | T | T |
| 0.3079239246105190 | 0.3534650455060370 | 0.5198324770368032 | T | T | T |
| 0.4059528887503563 | 0.3303522894573951 | 0.3897487817484507 | T | T | T |
| 0.3941486625396535 | 0.3461320539886183 | 0.1923188737917347 | T | T | T |
| 0.2723935546316004 | 0.3510670343538220 | 0.2601995798610448 | T | T | T |
| 0.1821297882075730 | 0.4492579916191684 | 0.2745213628644462 | T | T | T |
| 0.4088418625032342 | 0.4520795980040006 | 0.3122973821535055 | T | T | T |
| 0.0656745796768105 | 0.6242909444470929 | 0.0792865014617044 | T | T | T |
| 0.0793044376150474 | 0.4911867316906681 | 0.0841309643915423 | T | T | T |
| 0.1157308360015713 | 0.3631437958642991 | 0.0627353347831362 | T | T | T |
| 0.3034650430262025 | 0.6366433266872875 | 0.1165604223649648 | T | T | T |
| 0.3148064073912289 | 0.5050074348806597 | 0.0788406926378788 | T | T | T |
| 0.2934869086782154 | 0.3726609188616324 | 0.0654696280809469 | T | T | T |
| 0.5102662354063180 | 0.5371723336065992 | 0.2968362011023298 | T | T | T |
| 0.5100513815862567 | 0.3667522286439284 | 0.2787634393800401 | T | T | T |
| 0.4361321140242563 | 0.7501619865665204 | 0.6400137957398472 | T | T | T |
| 0.1907259680950214 | 0.7503026638128991 | 0.6373449753965899 | T | T | T |
| 0.2752283033667982 | 0.7495423642350468 | 0.0231538589441386 | T | T | T |
| 0.1033021110103396 | 0.7489363842164477 | 0.0489119059736602 | T | T | T |
| 0.0677869463103160 | 0.2484893327068629 | 0.1292924937655028 | T | T | T |
| 0.3079739106211909 | 0.2508503494329999 | 0.1367075118220775 | T | T | T |
| 0.2230669386515430 | 0.2500884057284731 | 0.5227068548721507 | T | T | T |
| 0.3923309955687155 | 0.2512555446256301 | 0.5461243077785322 | T | T | T |
| 0.5553509275755774 | 0.2510787517077243 | 0.3532910345540637 | T | T | T |
| 0.8074608549543364 | 0.2530291101680068 | 0.3548535001292986 | T | T | T |
| 0.7276146222692516 | 0.2506051963939072 | 0.9432695465507765 | T | T | T |
| 0.8914728695792909 | 0.2503728369447566 | 0.9409922670398334 | T | T | T |
| 0.9463871123414628 | 0.7545139668799097 | 0.8578221462232096 | T | T | T |
| 0.6823378652355229 | 0.7537663986314100 | 0.8544328848849611 | T | T | T |
| 0.7729395910531174 | 0.7496745023654520 | 0.4424594281381964 | T | T | T |
| 0.6077759930281910 | 0.7506545327369164 | 0.4493990581554784 | T | T | T |
| 0.9381717549009261 | 0.5101832422247410 | 0.5182130112893981 | T | T | T |
| 0.9332460234961040 | 0.4090072727180496 | 0.4380393655360493 | T | T | T |
| 0.8683813527881403 | 0.5645004729765184 | 0.5590639521429739 | T | T | T |
| 0.0515196453619661 | 0.4154966417951995 | 0.5146664608631289 | T | T | T |
| 0.0507265214955417 | 0.4287906506705968 | 0.3826101300054970 | T | T | T |
| 0.0444426978868192 | 0.3457014612527247 | 0.4306386662327720 | T | T | T |
| 0.0057153844040879 | 0.5637269978232144 | 0.3835798285674921 | T | T | T |
| 0.9771385559454685 | 0.6367344467597768 | 0.3163672830304416 | T | T | T |
| 0.0652456090656182 | 0.6197002316344101 | 0.3254537904359033 | T | T | T |
| 0.9715574352357328 | 0.5022261823293417 | 0.5699893168167425 | T | T | T |
| 0.0301210598115785 | 0.3981539462819395 | 0.4437573315556639 | T | T | T |
| 0.0153853293139317 | 0.5974788533506860 | 0.3204858257282036 | T | T | T |

**Figure S12(b) TS**

Si Al O Zn H C

1.0000000000000000

20.0219999999999985 0.0000000000000000 0.0000000000000000

**Structure files (CONTCAR) involved in this work:**

0.0000000000000000 19.8990000000000009 0.0000000000000000  
0.0000000000000000 0.0000000000000000 13.3829999999999991  
93 3 193 2 7 2

Selective dynamics

Direct

|                    |                    |                    |   |   |   |
|--------------------|--------------------|--------------------|---|---|---|
| 0.4227161185310807 | 0.0605556253372160 | 0.6476430717757068 | T | T | T |
| 0.3050857792747533 | 0.0323112324174673 | 0.7909638345858440 | T | T | T |
| 0.2826342388294759 | 0.0554825846281743 | 0.0163250327048317 | T | T | T |
| 0.1235548307199126 | 0.0625437033079469 | 0.0117745503947066 | T | T | T |
| 0.0682905730403666 | 0.0315290062438205 | 0.8011229851287209 | T | T | T |
| 0.1801546186964050 | 0.0657338060159645 | 0.6643724034239599 | T | T | T |
| 0.4183773518854101 | 0.8280316057288062 | 0.6683551236741861 | T | T | T |
| 0.3006590222047803 | 0.8735149062722172 | 0.7996799523401392 | T | T | T |
| 0.2672196693429940 | 0.8307477837324209 | 0.0189387268345903 | T | T | T |
| 0.1113208817621313 | 0.8259468304641605 | 0.0127141107270102 | T | T | T |
| 0.0667212947515893 | 0.8750045665830055 | 0.7987937823903202 | T | T | T |
| 0.1788746920730471 | 0.8291712536312964 | 0.6631799162328026 | T | T | T |
| 0.0759893507496330 | 0.9408808467299791 | 0.1480897777802005 | T | T | T |
| 0.1952356370063383 | 0.9703695051648172 | 0.2892868904819006 | T | T | T |
| 0.2164067741772544 | 0.9445405346347774 | 0.5154037469299744 | T | T | T |
| 0.3766166738403754 | 0.9360724712233741 | 0.5132911328952238 | T | T | T |
| 0.4335936731541731 | 0.9687612825309873 | 0.3014881254894768 | T | T | T |
| 0.3206556745521033 | 0.9349279842325988 | 0.1641215721087926 | T | T | T |
| 0.0828258219238715 | 0.1728292286759149 | 0.1655791484772933 | T | T | T |
| 0.1986961583180916 | 0.1290339837443014 | 0.2999858843733384 | T | T | T |
| 0.2312147773574052 | 0.1699954266491179 | 0.5177614099356269 | T | T | T |
| 0.3870898604138699 | 0.1743916821980313 | 0.5085083423001731 | T | T | T |
| 0.4349281002414413 | 0.1272994511689809 | 0.2950332454978264 | T | T | T |
| 0.3192109234295619 | 0.1724049229082716 | 0.1642253805930981 | T | T | T |
| 0.5773741633595096 | 0.5551529513365873 | 0.3567185332286865 | T | T | T |
| 0.6914642777445149 | 0.5272878138810499 | 0.2039433965132044 | T | T | T |
| 0.7137616238695486 | 0.5692386747914555 | 0.9873067314445504 | T | T | T |
| 0.8717240489173014 | 0.5749901293594990 | 0.9890836426572365 | T | T | T |
| 0.8117331688586611 | 0.5496068741752148 | 0.3498958172149879 | T | T | T |
| 0.5730425378527367 | 0.3303923772561383 | 0.3350778001029555 | T | T | T |
| 0.6960315509851098 | 0.3729951544919728 | 0.1983247051236198 | T | T | T |
| 0.7299798603660043 | 0.3273856268865048 | 0.9838370495585345 | T | T | T |
| 0.8845033090115834 | 0.3259717880210142 | 0.9931891888246611 | T | T | T |
| 0.9408822474434386 | 0.3757273579841857 | 0.1856980854267732 | T | T | T |
| 0.9189219356593513 | 0.4473958081339725 | 0.8650563437884836 | T | T | T |
| 0.7970728609953738 | 0.4739861081951893 | 0.7262475379694714 | T | T | T |
| 0.7774077127288544 | 0.4359952760621463 | 0.5003962359394081 | T | T | T |
| 0.6193933387981638 | 0.4292948634195067 | 0.4939109181950168 | T | T | T |
| 0.5675801029598724 | 0.4699223007689901 | 0.7060527783210480 | T | T | T |
| 0.6723769279564358 | 0.4469389455584429 | 0.8617505681965394 | T | T | T |
| 0.9205349114791087 | 0.6796055233520588 | 0.8334239295483723 | T | T | T |
| 0.7701602982974177 | 0.6702629855885965 | 0.4659467530220425 | T | T | T |
| 0.6143614169136631 | 0.6731283289070488 | 0.4865601466073979 | T | T | T |
| 0.5604810760208192 | 0.6285192932266783 | 0.6988003910271768 | T | T | T |
| 0.6691030879664642 | 0.6766447050381291 | 0.8317056137522483 | T | T | T |
| 0.5781740160984317 | 0.9462349559708262 | 0.3592310493458639 | T | T | T |
| 0.6991054131101553 | 0.9755918398030646 | 0.2177856036071866 | T | T | T |
| 0.7191329927840190 | 0.9401249324800255 | 0.9947730944864697 | T | T | T |



**Structure files (CONTCAR) involved in this work:**

|                    |                    |                    |   |   |   |
|--------------------|--------------------|--------------------|---|---|---|
| 0.8791460051458952 | 0.9353475466674828 | 0.9959330856758443 | T | T | T |
| 0.9314168523109621 | 0.9712702150011957 | 0.2052720986896808 | T | T | T |
| 0.8235597934924918 | 0.9478840876074333 | 0.3568936104667197 | T | T | T |
| 0.5776250793248312 | 0.1753211704612548 | 0.3300768274151546 | T | T | T |
| 0.6984936542671651 | 0.1344275060007901 | 0.1961233404465356 | T | T | T |
| 0.7319284839448438 | 0.1716161528375697 | 0.9730320872557134 | T | T | T |
| 0.8865660521099258 | 0.1738793459726043 | 0.9819966867205804 | T | T | T |
| 0.9358964459303443 | 0.1293395313765480 | 0.1962917273301500 | T | T | T |
| 0.8221849576526949 | 0.1768742031994345 | 0.3323689770934252 | T | T | T |
| 0.9231914274254593 | 0.0544226900188441 | 0.8560640814871920 | T | T | T |
| 0.8014218061869692 | 0.0266267513204076 | 0.7093379022001801 | T | T | T |
| 0.7818265439817172 | 0.0684540889256499 | 0.4918621530503850 | T | T | T |
| 0.6215549985742503 | 0.0712040163762083 | 0.4898364221414747 | T | T | T |
| 0.5684296164773269 | 0.0329109720007659 | 0.6982875912056481 | T | T | T |
| 0.6780959763420262 | 0.0550313802656469 | 0.8497439126339115 | T | T | T |
| 0.9238680315304431 | 0.8321267912861229 | 0.8380514486996289 | T | T | T |
| 0.8019320173963204 | 0.8690693940626805 | 0.6972873595338673 | T | T | T |
| 0.7701351047539426 | 0.8271458808148547 | 0.4793825231271150 | T | T | T |
| 0.6148023841300411 | 0.8271311587789282 | 0.4903378003613181 | T | T | T |
| 0.5637401759783967 | 0.8758386850047700 | 0.6975939495764005 | T | T | T |
| 0.6771178190948577 | 0.8344285584382369 | 0.8365188116930877 | T | T | T |
| 0.4223946505984000 | 0.4428177799753424 | 0.6440831117303948 | T | T | T |
| 0.3034595674462217 | 0.4693722941345856 | 0.7859757779930480 | T | T | T |
| 0.2814203870711366 | 0.4456345130822469 | 0.0120328543364355 | T | T | T |
| 0.1234772637494354 | 0.4377726211166850 | 0.0132010845677591 | T | T | T |
| 0.0629039363943231 | 0.4694638171483948 | 0.8018523170107449 | T | T | T |
| 0.1755231035079435 | 0.4357756057749282 | 0.6623559262835823 | T | T | T |
| 0.4148668182233234 | 0.6741486755633714 | 0.6642844846238198 | T | T | T |
| 0.2993061359509509 | 0.6279194963487716 | 0.7975325064294437 | T | T | T |
| 0.2674516966597457 | 0.6695143063198425 | 0.0170723991878101 | T | T | T |
| 0.1116882390833093 | 0.6717409244470472 | 0.0094628562004669 | T | T | T |
| 0.0627042909462191 | 0.6285599570670137 | 0.7946685252614812 | T | T | T |
| 0.1777449435508545 | 0.6720571867877965 | 0.6619307979812723 | T | T | T |
| 0.0737785428884185 | 0.5583612130514812 | 0.1511253037688546 | T | T | T |
| 0.1959508789179638 | 0.5305357446689994 | 0.2865125045388340 | T | T | T |
| 0.2143000999795078 | 0.5556505023411941 | 0.5159382733316137 | T | T | T |
| 0.3731527250541299 | 0.5659630572027743 | 0.5134461307379968 | T | T | T |
| 0.4290470462949444 | 0.5307312880874218 | 0.3034858408789501 | T | T | T |
| 0.3217330726151635 | 0.5647492128870558 | 0.1598543733672584 | T | T | T |
| 0.0865613509893398 | 0.3258148656492944 | 0.1580720023115839 | T | T | T |
| 0.1991023163810293 | 0.3718264763289196 | 0.2971368285683099 | T | T | T |
| 0.2297830621051377 | 0.3313483111370540 | 0.5167917759426416 | T | T | T |
| 0.3851693590272563 | 0.3281490925348106 | 0.5062151187409201 | T | T | T |
| 0.4305574627832028 | 0.3740576507352190 | 0.2930208726520743 | T | T | T |
| 0.3182948769576210 | 0.3293413030734699 | 0.1599600552306415 | T | T | T |
| 0.9241847467459454 | 0.5295708938049288 | 0.1923856561445069 | T | T | T |
| 0.8267529072011088 | 0.3395646331071633 | 0.3319844680976222 | T | T | T |
| 0.7961813424705770 | 0.6396349654128995 | 0.7019360520490444 | T | T | T |
| 0.0075485911186913 | 0.5522802196327640 | 0.2203974812727147 | T | T | T |
| 0.3593382956160878 | 0.0710384304923696 | 0.7217661168890660 | T | T | T |
| 0.3170293499411368 | 0.0531265045487813 | 0.9065747810882182 | T | T | T |
| 0.2025893154418666 | 0.0456891288656837 | 0.0061704392229209 | T | T | T |
| 0.0928186160941099 | 0.0708186767378487 | 0.9007394349613075 | T | T | T |

**Structure files (CONTCAR) involved in this work:**

|                    |                    |                    |   |   |   |
|--------------------|--------------------|--------------------|---|---|---|
| 0.1035355533676105 | 0.0650147462306442 | 0.7037758128690608 | T | T | T |
| 0.2297770921886347 | 0.0539636552259439 | 0.7592163676999565 | T | T | T |
| 0.3604166004703714 | 0.8285631589422280 | 0.7531309879756470 | T | T | T |
| 0.2998694181470895 | 0.8632865512552143 | 0.9193204483365346 | T | T | T |
| 0.1885345649992461 | 0.8505120521170468 | 0.0240616094921321 | T | T | T |
| 0.0888717399821136 | 0.8325070205098444 | 0.8969002054432572 | T | T | T |
| 0.1025062931016975 | 0.8419321875480222 | 0.7009359657894217 | T | T | T |
| 0.2291052502571580 | 0.8500016190198948 | 0.7538769903668974 | T | T | T |
| 0.3146466761483673 | 0.9519033041784697 | 0.7732639668708191 | T | T | T |
| 0.0902471704258130 | 0.9528192609963555 | 0.8104374768018596 | T | T | T |
| 0.4328842900276886 | 0.1278492711921469 | 0.5804887673548131 | T | T | T |
| 0.4120963051778314 | 0.9967281260959356 | 0.5739895332180275 | T | T | T |
| 0.3918204923915924 | 0.8649328062605361 | 0.5677859935884364 | T | T | T |
| 0.1951099739710567 | 0.1389386669812675 | 0.6156969340740972 | T | T | T |
| 0.1897118862298570 | 0.0063522312886762 | 0.5828769756385968 | T | T | T |
| 0.1941963032528941 | 0.8729384486886809 | 0.5634965765733470 | T | T | T |
| 0.9881707801005611 | 0.0388456720682455 | 0.7872740926734580 | T | T | T |
| 0.9860863247742702 | 0.8719564100954853 | 0.7857794616865676 | T | T | T |
| 0.1403336849898082 | 0.9321148763832404 | 0.2208126306885654 | T | T | T |
| 0.1831361207769373 | 0.9506990557285768 | 0.4052941235551508 | T | T | T |
| 0.2969429933908830 | 0.9492239120464007 | 0.5076826602251998 | T | T | T |
| 0.4075088368298037 | 0.9317173520775170 | 0.4020454560219400 | T | T | T |
| 0.3968609075713238 | 0.9354773153627407 | 0.2052353149329176 | T | T | T |
| 0.2701480728199037 | 0.9471874987638523 | 0.2578496785188568 | T | T | T |
| 0.1393013174002553 | 0.1738948901384809 | 0.2525711694245673 | T | T | T |
| 0.1960234897951177 | 0.1374824617585225 | 0.4200157630532379 | T | T | T |
| 0.3098104081766012 | 0.1495771589343262 | 0.5171924823408565 | T | T | T |
| 0.4119545077172139 | 0.1686761289710179 | 0.3938045765372152 | T | T | T |
| 0.3960577080194349 | 0.1580619784256181 | 0.1982224572705641 | T | T | T |
| 0.2708774359852021 | 0.1546740327154189 | 0.2589274470224098 | T | T | T |
| 0.1870444770009731 | 0.0507628183033699 | 0.2701230057604577 | T | T | T |
| 0.4156795436387916 | 0.0484670975885389 | 0.3083496546744809 | T | T | T |
| 0.0649441517666039 | 0.8718506843168649 | 0.0849892664155933 | T | T | T |
| 0.0854486709796436 | 0.0020610066010372 | 0.0692979475671548 | T | T | T |
| 0.1113290873074652 | 0.1329046618153116 | 0.0691526385420142 | T | T | T |
| 0.3057666366696716 | 0.8618031428193326 | 0.1148990304087682 | T | T | T |
| 0.3123975251217912 | 0.9942354678273784 | 0.0821255301012333 | T | T | T |
| 0.2997278596104286 | 0.1273322234524726 | 0.0676088554932538 | T | T | T |
| 0.5133067301162115 | 0.9570906281046860 | 0.2882468856869924 | T | T | T |
| 0.5150437586628828 | 0.1352577121025535 | 0.2792678290222699 | T | T | T |
| 0.6363553462996729 | 0.5625401597410579 | 0.2750784056300799 | T | T | T |
| 0.7017819010576876 | 0.5747698131089011 | 0.1070572669320644 | T | T | T |
| 0.7928252609405555 | 0.5634941868905803 | 0.9596855381234561 | T | T | T |
| 0.8826132408303926 | 0.5798368320248871 | 0.1077997295631521 | T | T | T |
| 0.8875667932030417 | 0.5274159343598653 | 0.3180337252962380 | T | T | T |
| 0.7616132497051703 | 0.5249305373678356 | 0.2653902527590942 | T | T | T |
| 0.6396832628683977 | 0.3379486469615284 | 0.2689185970945020 | T | T | T |
| 0.6939757380551237 | 0.3332576094899876 | 0.0916953403071448 | T | T | T |
| 0.8074697883988403 | 0.3523082409382618 | 0.9908055983886167 | T | T | T |
| 0.9106428483854495 | 0.3200317633500426 | 0.1081812621232756 | T | T | T |
| 0.9094633614771094 | 0.3658058245567803 | 0.2981728365921647 | T | T | T |
| 0.7683786486505823 | 0.3708464245088745 | 0.2485019089824824 | T | T | T |
| 0.6716814207733498 | 0.4507159411956917 | 0.1766525892604498 | T | T | T |

**Structure files (CONTCAR) involved in this work:**

|                    |                    |                    |   |   |   |
|--------------------|--------------------|--------------------|---|---|---|
| 0.9242450959946812 | 0.4492665200652177 | 0.1454172500019751 | T | T | T |
| 0.5686317472754913 | 0.6266159867357001 | 0.4141208505971763 | T | T | T |
| 0.5943699367132138 | 0.4978690117477992 | 0.4396233189989883 | T | T | T |
| 0.5831739143333371 | 0.3643782375528609 | 0.4451540373565572 | T | T | T |
| 0.8064962817324299 | 0.6299218323443184 | 0.3736493262240853 | T | T | T |
| 0.7943096856561144 | 0.5151644547839045 | 0.4610526556505450 | T | T | T |
| 0.8284026272441041 | 0.3880257919983804 | 0.4430632733742834 | T | T | T |
| 0.0212068960925480 | 0.3648633871450966 | 0.1976562653962700 | T | T | T |
| 0.8532178283795667 | 0.4378456193821356 | 0.7942471415082509 | T | T | T |
| 0.7935634898598303 | 0.4355344761052333 | 0.6189641214560417 | T | T | T |
| 0.6997309460500233 | 0.4216682590612790 | 0.4773267638102763 | T | T | T |
| 0.6026956953257406 | 0.4315884425196074 | 0.6121445150368832 | T | T | T |
| 0.5989444287204130 | 0.4434580589868748 | 0.8107711366458107 | T | T | T |
| 0.7242469516574547 | 0.4723260861814465 | 0.7758377791119448 | T | T | T |
| 0.8597211389111453 | 0.6829455656865490 | 0.7563301926801917 | T | T | T |
| 0.8112982260663408 | 0.6471910248947540 | 0.5677669594057502 | T | T | T |
| 0.6924083318852701 | 0.6481320551571331 | 0.4787804354098595 | T | T | T |
| 0.5882311434075813 | 0.6672402369043716 | 0.6003036126976949 | T | T | T |
| 0.5913151801453993 | 0.6641653895562354 | 0.7979024056155845 | T | T | T |
| 0.7165610240349061 | 0.6534967714443010 | 0.7406283711935087 | T | T | T |
| 0.8191102405406347 | 0.5519500812573468 | 0.7027251933982223 | T | T | T |
| 0.5814113043594755 | 0.5498130984528956 | 0.6926786951767181 | T | T | T |
| 0.9297824183099781 | 0.3786999322586894 | 0.9288980955796607 | T | T | T |
| 0.9127783865941883 | 0.5125281671321543 | 0.9367674164072934 | T | T | T |
| 0.8993515824293215 | 0.6438352913945861 | 0.9379196958884007 | T | T | T |
| 0.6914519917374747 | 0.3728585729361451 | 0.9013726007052102 | T | T | T |
| 0.6743143258925335 | 0.5017273823204363 | 0.9511915150783813 | T | T | T |
| 0.6827088702867045 | 0.6352933402648815 | 0.9346337525742447 | T | T | T |
| 0.4884536104744797 | 0.4529156920642827 | 0.7119749120114323 | T | T | T |
| 0.4795276188923709 | 0.6330066531738480 | 0.7040600644441760 | T | T | T |
| 0.6440233516854292 | 0.9408265062842115 | 0.2897097669497985 | T | T | T |
| 0.6988753546104916 | 0.9362610882609638 | 0.1117252350369536 | T | T | T |
| 0.7995315838713362 | 0.9465651738365350 | 0.9805043507096534 | T | T | T |
| 0.8978092866231827 | 0.9295952403343001 | 0.1134856078308188 | T | T | T |
| 0.8985140470594896 | 0.9487445977326284 | 0.3109006153063825 | T | T | T |
| 0.7723872091250552 | 0.9677015182306993 | 0.2676660364189625 | T | T | T |
| 0.6399574380378578 | 0.1756769074252647 | 0.2531929801280549 | T | T | T |
| 0.6970038775174638 | 0.1569231453694910 | 0.0799278424711577 | T | T | T |
| 0.8096254737048119 | 0.1472940180961725 | 0.9773689298131578 | T | T | T |
| 0.9133455056378195 | 0.1688529966910557 | 0.0958182700284812 | T | T | T |
| 0.8977950518532967 | 0.1583940722565078 | 0.2938370992188565 | T | T | T |
| 0.7707507814479428 | 0.1503929409717921 | 0.2450825032424132 | T | T | T |
| 0.6817199772134072 | 0.0545608927039691 | 0.2037027412824402 | T | T | T |
| 0.9186891727098574 | 0.0502220091583341 | 0.1828050436881574 | T | T | T |
| 0.5696765136463259 | 0.8762354497297491 | 0.4210895786663047 | T | T | T |
| 0.5829496349764527 | 0.0081701807759054 | 0.4381741960242053 | T | T | T |
| 0.5990040880781726 | 0.1405128872225583 | 0.4354094793793523 | T | T | T |
| 0.8096229604630643 | 0.8725720136441506 | 0.3987793331203488 | T | T | T |
| 0.8179133424976853 | 1.0014662386934690 | 0.4476244679318714 | T | T | T |
| 0.8072467016945754 | 0.1354873491816255 | 0.4356087866727922 | T | T | T |
| 0.0105347317310492 | 0.9548747094035511 | 0.2157424854223384 | T | T | T |
| 0.0160946483577311 | 0.1383616559674402 | 0.2113231933872967 | T | T | T |
| 0.8577963805008041 | 0.0543680328065174 | 0.7852751811159580 | T | T | T |

**Structure files (CONTCAR) involved in this work:**

|                    |                    |                    |   |   |   |
|--------------------|--------------------|--------------------|---|---|---|
| 0.8012159775286873 | 0.0732754194362298 | 0.6097435633235426 | T | T | T |
| 0.7013903147108019 | 0.0598332926414636 | 0.4781342644983746 | T | T | T |
| 0.6005157685823677 | 0.0763532817361206 | 0.6069087990077934 | T | T | T |
| 0.6031621010906270 | 0.0523144660496648 | 0.8038888692233670 | T | T | T |
| 0.7288084399061041 | 0.0302415966772169 | 0.7625773998373414 | T | T | T |
| 0.8604561547207989 | 0.8360746938985195 | 0.7637089601593910 | T | T | T |
| 0.8032333137276524 | 0.8314962958643236 | 0.5896170872868461 | T | T | T |
| 0.6925600620010306 | 0.8511982199160019 | 0.4845478844091827 | T | T | T |
| 0.5893911363226115 | 0.8292636645947987 | 0.6053670604283550 | T | T | T |
| 0.6020755263909012 | 0.8540411501839443 | 0.7994296012986043 | T | T | T |
| 0.7296833444820606 | 0.8573791158325131 | 0.7498145635218265 | T | T | T |
| 0.8159454314890299 | 0.9486382974642511 | 0.6802872570751843 | T | T | T |
| 0.5793685950462477 | 0.9538809263603354 | 0.6714055756553116 | T | T | T |
| 0.9318128990264217 | 0.1279374035742744 | 0.9077227464356342 | T | T | T |
| 0.9179632785218703 | 0.9983714801021205 | 0.9445031115987902 | T | T | T |
| 0.9035656603158615 | 0.8658202950107708 | 0.9443412780497379 | T | T | T |
| 0.6938182405753678 | 0.1313747580705276 | 0.8844238718919226 | T | T | T |
| 0.6834280106154197 | 0.0058121130290328 | 0.9462574377748050 | T | T | T |
| 0.6931859946509188 | 0.8720880950334577 | 0.9411192583925064 | T | T | T |
| 0.4895859527917731 | 0.0489894113141357 | 0.7132748833506626 | T | T | T |
| 0.4839975730249372 | 0.8651861641774469 | 0.7135999645388094 | T | T | T |
| 0.3578937871425628 | 0.4315198443338184 | 0.7160163272375677 | T | T | T |
| 0.3143240662419918 | 0.4468416770235119 | 0.9011619915907545 | T | T | T |
| 0.2015433324749791 | 0.4592869459620995 | 0.0043006747570883 | T | T | T |
| 0.0895652176625273 | 0.4349127812901205 | 0.9035704231947116 | T | T | T |
| 0.0995001927172188 | 0.4349112531168076 | 0.7057807260797846 | T | T | T |
| 0.2277915091158770 | 0.4491627958465914 | 0.7531810370094211 | T | T | T |
| 0.3577371010960266 | 0.6742206237317933 | 0.7503829714323700 | T | T | T |
| 0.3001609582214145 | 0.6375659518243252 | 0.9171324016855282 | T | T | T |
| 0.1891503018368969 | 0.6480807448097627 | 0.0214503638589827 | T | T | T |
| 0.0896063709507900 | 0.6675164219708213 | 0.8931954422391190 | T | T | T |
| 0.1007204981064161 | 0.6588670407200620 | 0.6964550319467918 | T | T | T |
| 0.2267434121513244 | 0.6498707906173052 | 0.7533917484293970 | T | T | T |
| 0.3139908431652102 | 0.5497700835102706 | 0.7703109822263056 | T | T | T |
| 0.0804996980533416 | 0.5490821672603424 | 0.8037314724712018 | T | T | T |
| 0.4321005351816136 | 0.3771658466224339 | 0.5731317500321007 | T | T | T |
| 0.4144083170476536 | 0.5086828136477626 | 0.5733108223034807 | T | T | T |
| 0.3844867605392203 | 0.6391440875441783 | 0.5640997784547613 | T | T | T |
| 0.1906795032237621 | 0.3631699561746852 | 0.6119938039160782 | T | T | T |
| 0.1800413006560679 | 0.4956642105010916 | 0.5798925580431255 | T | T | T |
| 0.1935254309947547 | 0.6283358890233700 | 0.5616960263196235 | T | T | T |
| 0.9827544273720642 | 0.4572635348356046 | 0.7892891136627257 | T | T | T |
| 0.9828654665686373 | 0.6383307520653733 | 0.7812972391201558 | T | T | T |
| 0.1388732470238371 | 0.5699586709745877 | 0.2232723772941085 | T | T | T |
| 0.1849042890879073 | 0.5513626440073472 | 0.4028355511024806 | T | T | T |
| 0.2944729202963680 | 0.5459370665988904 | 0.5151200912219637 | T | T | T |
| 0.4000548647029477 | 0.5705716397669048 | 0.3998771915848330 | T | T | T |
| 0.3973824883306112 | 0.5642771616332973 | 0.2033402273457705 | T | T | T |
| 0.2703899158611600 | 0.5521283950655628 | 0.2527234925634788 | T | T | T |
| 0.1413767253002042 | 0.3259376880843727 | 0.2477374240173731 | T | T | T |
| 0.1960076513785261 | 0.3627688337550039 | 0.4169952505779677 | T | T | T |
| 0.3080402088396484 | 0.3529581990776637 | 0.5194138825171457 | T | T | T |
| 0.4063923826186536 | 0.3305374490580217 | 0.3893232484208528 | T | T | T |

**Structure files (CONTCAR) involved in this work:**

|                    |                    |                    |   |   |   |
|--------------------|--------------------|--------------------|---|---|---|
| 0.3951496586684300 | 0.3452821216263971 | 0.1920711373977378 | T | T | T |
| 0.2718469263301034 | 0.3489444263167502 | 0.2559890315343559 | T | T | T |
| 0.1855291358626236 | 0.4503509184182019 | 0.2691435089845940 | T | T | T |
| 0.4081971563543630 | 0.4518329278675876 | 0.3108431239366102 | T | T | T |
| 0.0655225045294621 | 0.6231997806148031 | 0.0778682252796050 | T | T | T |
| 0.0843458153760590 | 0.4917743778944053 | 0.0825277649233807 | T | T | T |
| 0.1179114974612803 | 0.3628236807891119 | 0.0603317682518038 | T | T | T |
| 0.3066672376115756 | 0.6380940929837432 | 0.1122168550560012 | T | T | T |
| 0.3145186884450832 | 0.5055495377288599 | 0.0774070365510327 | T | T | T |
| 0.2966059186699698 | 0.3730204978975197 | 0.0626660804147082 | T | T | T |
| 0.5093592821998586 | 0.5372647155096349 | 0.2974611908228686 | T | T | T |
| 0.5108458970224876 | 0.3677704881938779 | 0.2788594568694062 | T | T | T |
| 0.4357322205364959 | 0.7508749862273568 | 0.6388362792458554 | T | T | T |
| 0.1887707174244226 | 0.7505052171055387 | 0.6339759040636079 | T | T | T |
| 0.2763269565902889 | 0.7500643872190322 | 0.0182071013329621 | T | T | T |
| 0.1031347934160005 | 0.7484465667291267 | 0.0480643777660971 | T | T | T |
| 0.0680169421656329 | 0.2491337398371933 | 0.1293045370235042 | T | T | T |
| 0.3100352402021372 | 0.2505548928079412 | 0.1320954262931083 | T | T | T |
| 0.2217128238439961 | 0.2507011458679111 | 0.5185963131340577 | T | T | T |
| 0.3935621118868778 | 0.2516770026930317 | 0.5458332827052025 | T | T | T |
| 0.5549039902482331 | 0.2519541687995734 | 0.3531912228831052 | T | T | T |
| 0.8160335291258676 | 0.2553149556638271 | 0.3531902646202111 | T | T | T |
| 0.7268127288429700 | 0.2504883716440920 | 0.9447973586029592 | T | T | T |
| 0.8908881709604893 | 0.2514559953259694 | 0.9439456732959833 | T | T | T |
| 0.9463409547162699 | 0.7553175969271688 | 0.8594444619440272 | T | T | T |
| 0.6814545320131598 | 0.7550326309662194 | 0.8585993932356591 | T | T | T |
| 0.7764350900573426 | 0.7493570493854638 | 0.4428659271015621 | T | T | T |
| 0.6083982077274427 | 0.7504960581541197 | 0.4495134420821210 | T | T | T |
| 0.9301492955359267 | 0.4995271289345117 | 0.5361154116709738 | T | T | T |
| 0.9380169429827325 | 0.4484600638910656 | 0.3970104692540281 | T | T | T |
| 0.8617592193051503 | 0.5602889446006030 | 0.5670374396887463 | T | T | T |
| 0.0507348404878294 | 0.4384270710846674 | 0.4907341190233390 | T | T | T |
| 0.0746546478000656 | 0.4598766538859557 | 0.3646505870385359 | T | T | T |
| 0.0362549702255933 | 0.3805170042688487 | 0.3862489659328928 | T | T | T |
| 0.0104943643300619 | 0.5502858909335597 | 0.4684585790020195 | T | T | T |
| 0.9852860425445109 | 0.6122467606324646 | 0.3701734097074358 | T | T | T |
| 0.0740848779406134 | 0.5836727515742612 | 0.3768201260094582 | T | T | T |
| 0.9461549503834448 | 0.4748929098506766 | 0.5945008061526678 | T | T | T |
| 0.0389308697442301 | 0.4331080182984320 | 0.4112117877619281 | T | T | T |
| 0.0225430414149224 | 0.5783200739692032 | 0.4010028776329020 | T | T | T |

**Figure S12(b) FS**

Si Al O Zn H C

|                     |                     |                     |
|---------------------|---------------------|---------------------|
| 1.0000000000000000  |                     |                     |
| 20.0219999999999985 | 0.0000000000000000  | 0.0000000000000000  |
| 0.0000000000000000  | 19.8990000000000009 | 0.0000000000000000  |
| 0.0000000000000000  | 0.0000000000000000  | 13.3829999999999991 |
| 93                  | 3                   | 193                 |
| 2                   | 7                   | 2                   |

Selective dynamics

Direct

|                    |                    |                    |   |   |   |
|--------------------|--------------------|--------------------|---|---|---|
| 0.4238319728443616 | 0.0593900567187360 | 0.6475177094328433 | T | T | T |
| 0.3058870389143714 | 0.0296037345879500 | 0.7905525355170347 | T | T | T |
| 0.2835772210546737 | 0.0559011823480334 | 0.0154568482892769 | T | T | T |
| 0.1241205372115358 | 0.0615638719527922 | 0.0118567970183750 | T | T | T |

**Structure files (CONTCAR) involved in this work:**

|                    |                    |                    |   |   |   |
|--------------------|--------------------|--------------------|---|---|---|
| 0.0685254063806313 | 0.0303810312769803 | 0.8001421218457857 | T | T | T |
| 0.1807231563958441 | 0.0636787754990723 | 0.6640221673256413 | T | T | T |
| 0.4196388668467449 | 0.8271583710950829 | 0.6666450132718664 | T | T | T |
| 0.3026821322660797 | 0.8704717322427736 | 0.8009237106772753 | T | T | T |
| 0.2677521388986702 | 0.8314238143092180 | 0.0205127219305880 | T | T | T |
| 0.1131115229284241 | 0.8262328332632080 | 0.0107123033743087 | T | T | T |
| 0.0666710732151879 | 0.8734758498613147 | 0.7965415038853110 | T | T | T |
| 0.1809514157245683 | 0.8266674746883038 | 0.6653132154517395 | T | T | T |
| 0.0777269987960003 | 0.9393185513012658 | 0.1487623502374456 | T | T | T |
| 0.1955547388999212 | 0.9692664077548907 | 0.2915077165566315 | T | T | T |
| 0.2173438984436477 | 0.9425632078804402 | 0.5164753255486656 | T | T | T |
| 0.3772085985688654 | 0.9360136760979414 | 0.5127068403775142 | T | T | T |
| 0.4343365454268121 | 0.9680410834920807 | 0.3012527356480784 | T | T | T |
| 0.3210997569548529 | 0.9365759151845064 | 0.1650802840746263 | T | T | T |
| 0.0832904189752788 | 0.1722532489626512 | 0.1645679549459991 | T | T | T |
| 0.1984237770635324 | 0.1282290385519704 | 0.3010516206458441 | T | T | T |
| 0.2327389704798944 | 0.1696325044494387 | 0.5194653175847870 | T | T | T |
| 0.3883358970617294 | 0.1734449710165173 | 0.5086972803901102 | T | T | T |
| 0.4355796535553683 | 0.1266295929039565 | 0.2945349479081678 | T | T | T |
| 0.3190564177426636 | 0.1713354030997029 | 0.1644000246733041 | T | T | T |
| 0.5761134599720346 | 0.5549415621299407 | 0.3534575133199785 | T | T | T |
| 0.6905752285925842 | 0.5248904348864419 | 0.2010535564956887 | T | T | T |
| 0.7145303283200668 | 0.5687047565983638 | 0.9846046384466245 | T | T | T |
| 0.8718600273370350 | 0.5732851211182054 | 0.9874625169676489 | T | T | T |
| 0.8109182931404417 | 0.5486967626655226 | 0.3468359935358278 | T | T | T |
| 0.5741343019930486 | 0.3279685196204558 | 0.3323619200186760 | T | T | T |
| 0.6954684669593613 | 0.3704141908638646 | 0.1930080131347697 | T | T | T |
| 0.7306514539798078 | 0.3259120747500578 | 0.9806900154125155 | T | T | T |
| 0.8853246384628821 | 0.3247531729755957 | 0.9956154327173561 | T | T | T |
| 0.9428694918767258 | 0.3743179921027183 | 0.1874992739163671 | T | T | T |
| 0.9205995311690950 | 0.4449530098705938 | 0.8647880337233956 | T | T | T |
| 0.8007546208161941 | 0.4698909703090025 | 0.7227853964733306 | T | T | T |
| 0.7746855852433773 | 0.4346849935938946 | 0.4987666712955752 | T | T | T |
| 0.6165790517967957 | 0.4288645411940087 | 0.4910227020677653 | T | T | T |
| 0.5669062398935837 | 0.4691780920925591 | 0.7045377856514514 | T | T | T |
| 0.6748791392571933 | 0.4465541664409884 | 0.8572782853993632 | T | T | T |
| 0.9217845365170192 | 0.6773374186816405 | 0.8324133879864279 | T | T | T |
| 0.7719343855693778 | 0.6679271470036097 | 0.4662617303532005 | T | T | T |
| 0.6162246881151852 | 0.6718554688779051 | 0.4858512259704813 | T | T | T |
| 0.5611538934638955 | 0.6278549108860769 | 0.6978595641665969 | T | T | T |
| 0.6724806148584783 | 0.6740905881531513 | 0.8278710094326848 | T | T | T |
| 0.5790692420828411 | 0.9444908808288286 | 0.3587411328653176 | T | T | T |
| 0.7000257525500679 | 0.9732629408617808 | 0.2156419047077108 | T | T | T |
| 0.7206832089353344 | 0.9367335752185342 | 0.9937671823788988 | T | T | T |
| 0.8809234882921044 | 0.9335621990182660 | 0.9952412855864977 | T | T | T |
| 0.9331502334325822 | 0.9694181941822905 | 0.2048994605146990 | T | T | T |
| 0.8242690066760666 | 0.9456781460932958 | 0.3557470724345742 | T | T | T |
| 0.5785921574123418 | 0.1727686976913218 | 0.3293200728219049 | T | T | T |
| 0.6994056436519124 | 0.1318188184514109 | 0.1938968607887491 | T | T | T |
| 0.7330253364848478 | 0.1704909324839255 | 0.9719156019230433 | T | T | T |
| 0.8876171112139397 | 0.1727835708553666 | 0.9832512309231040 | T | T | T |
| 0.9373724831461748 | 0.1273939715291906 | 0.1964437935224461 | T | T | T |
| 0.8226856352546988 | 0.1724366544175730 | 0.3310773094230068 | T | T | T |

**Structure files (CONTCAR) involved in this work:**

|                    |                    |                    |   |   |   |
|--------------------|--------------------|--------------------|---|---|---|
| 0.9239109434559959 | 0.0540803022994521 | 0.8562799251464044 | T | T | T |
| 0.8029769989920156 | 0.0258810108880750 | 0.7099880090000478 | T | T | T |
| 0.7821384448930134 | 0.0653481879314959 | 0.4919301619838954 | T | T | T |
| 0.6219015447114790 | 0.0690509147106415 | 0.4901789112332190 | T | T | T |
| 0.5694020494306731 | 0.0312155307321757 | 0.6986914521665647 | T | T | T |
| 0.6793948881599442 | 0.0523846657928673 | 0.8498084531062526 | T | T | T |
| 0.9246637334991716 | 0.8301902436994970 | 0.8368066520890718 | T | T | T |
| 0.8036574908705485 | 0.8691051971227827 | 0.6967967393012184 | T | T | T |
| 0.7720850179493968 | 0.8258152476459321 | 0.4790810327055552 | T | T | T |
| 0.6168918057395957 | 0.8258341307319648 | 0.4897708237101885 | T | T | T |
| 0.5650715989210517 | 0.8742292408112375 | 0.6969291707752524 | T | T | T |
| 0.6791982272120236 | 0.8329568608243588 | 0.8329459263249873 | T | T | T |
| 0.4236669815349348 | 0.4432625307077649 | 0.6384492850652500 | T | T | T |
| 0.3033687144858916 | 0.4701570744718288 | 0.7795933483329082 | T | T | T |
| 0.2834876163239517 | 0.4411640923667960 | 0.0029851475529286 | T | T | T |
| 0.1249906644272704 | 0.4367470103486377 | 0.0101428171966623 | T | T | T |
| 0.0655663480424139 | 0.4690735951977436 | 0.8001165143104072 | T | T | T |
| 0.1751894713628603 | 0.4402984460774677 | 0.6520757024179639 | T | T | T |
| 0.4175465909153879 | 0.6737911759126833 | 0.6564267998902594 | T | T | T |
| 0.3012877427847049 | 0.6286252173972975 | 0.7938701045799441 | T | T | T |
| 0.2693553918935850 | 0.6709423274237681 | 0.0134987955559631 | T | T | T |
| 0.1148287099476349 | 0.6719535722598334 | 0.0043136182632642 | T | T | T |
| 0.0641687948226147 | 0.6280383012643468 | 0.7931333925128137 | T | T | T |
| 0.1787841389725334 | 0.6690153804313893 | 0.6592008390151139 | T | T | T |
| 0.0743802747969172 | 0.5585965561175246 | 0.1452200569511477 | T | T | T |
| 0.1971713103650164 | 0.5283795425846651 | 0.2781852789333857 | T | T | T |
| 0.2177105442057589 | 0.5569248645347621 | 0.5088349454394591 | T | T | T |
| 0.3755714785377133 | 0.5649825810634667 | 0.5082105079613417 | T | T | T |
| 0.4270135736982442 | 0.5283642094464289 | 0.2972392371330465 | T | T | T |
| 0.3240252577064201 | 0.5587113122509956 | 0.1439880859430207 | T | T | T |
| 0.0871151621005266 | 0.3247665050155628 | 0.1580732474951173 | T | T | T |
| 0.1988060362305502 | 0.3708255340797335 | 0.2969570927469692 | T | T | T |
| 0.2316500537015594 | 0.3306017902806065 | 0.5172804655187876 | T | T | T |
| 0.3869471943197867 | 0.3270913967642780 | 0.5041964379697752 | T | T | T |
| 0.4323648151468056 | 0.3709972130688310 | 0.2901091990296994 | T | T | T |
| 0.3184864601808061 | 0.3288192194711961 | 0.1593125955748909 | T | T | T |
| 0.9263937121340822 | 0.5299427299691051 | 0.1906007737800578 | T | T | T |
| 0.8238231945950948 | 0.3341512917843125 | 0.3258931420476253 | T | T | T |
| 0.7995877992697268 | 0.6338962861334327 | 0.6986505824706464 | T | T | T |
| 0.0083658460816516 | 0.5532948425451566 | 0.2121397434837392 | T | T | T |
| 0.3599588395693915 | 0.0683470900502653 | 0.7210461838402087 | T | T | T |
| 0.3175475478609348 | 0.0518488156495209 | 0.9056157498006095 | T | T | T |
| 0.2034545192509895 | 0.0462659393820460 | 0.0066022936353597 | T | T | T |
| 0.0932289063312620 | 0.0681818827314451 | 0.9007854896739607 | T | T | T |
| 0.1041887685062088 | 0.0646747851429200 | 0.7038367420788805 | T | T | T |
| 0.2304037204503937 | 0.0502391047093767 | 0.7582785087329758 | T | T | T |
| 0.3620402830801939 | 0.8260109334191786 | 0.7519645079047230 | T | T | T |
| 0.3041120561684368 | 0.8593897540165026 | 0.9204929990134550 | T | T | T |
| 0.1896234817737488 | 0.8537847673651543 | 0.0179321091166167 | T | T | T |
| 0.0875010762467296 | 0.8324652154881133 | 0.8964228444004378 | T | T | T |
| 0.1041399825349768 | 0.8398876117573362 | 0.7006072012077249 | T | T | T |
| 0.2304483732175089 | 0.8467969027441311 | 0.7574677992052433 | T | T | T |
| 0.3159956988566003 | 0.9491048958513685 | 0.7746461845580938 | T | T | T |

**Structure files (CONTCAR) involved in this work:**

|                    |                    |                    |   |   |   |
|--------------------|--------------------|--------------------|---|---|---|
| 0.0896877458749363 | 0.9514823947391671 | 0.8069319966870917 | T | T | T |
| 0.4338301157690274 | 0.1275068567051627 | 0.5820561250088095 | T | T | T |
| 0.4140059912604054 | 0.9965577518265879 | 0.5718643788787738 | T | T | T |
| 0.3919183240385777 | 0.8650607745613043 | 0.5677287502769521 | T | T | T |
| 0.1970086472761962 | 0.1366798873251136 | 0.6161556513318527 | T | T | T |
| 0.1884775389651781 | 0.0045042352353021 | 0.5817659419086521 | T | T | T |
| 0.1979154922892647 | 0.8708904976377343 | 0.5666341898856668 | T | T | T |
| 0.9884286737501909 | 0.0386519345260411 | 0.7865769526411116 | T | T | T |
| 0.9861255520806717 | 0.8695033416942296 | 0.7815599275016879 | T | T | T |
| 0.1423234872941311 | 0.9303210896334059 | 0.2209152354011653 | T | T | T |
| 0.1839495758380433 | 0.9460806726381672 | 0.4062022700021458 | T | T | T |
| 0.2977000730910425 | 0.9503383303242652 | 0.5084872817146743 | T | T | T |
| 0.4075504544086794 | 0.9308108387569686 | 0.4012139240307878 | T | T | T |
| 0.3976814753945342 | 0.9353946344699818 | 0.2045946494910113 | T | T | T |
| 0.2715099185676808 | 0.9502571291935744 | 0.2594485490012818 | T | T | T |
| 0.1405955016215071 | 0.1734797880959992 | 0.2502155443998791 | T | T | T |
| 0.1962690432996146 | 0.1407059704356096 | 0.4203149060790886 | T | T | T |
| 0.3111004788266972 | 0.1483019030356293 | 0.5160674736362343 | T | T | T |
| 0.4138386223098987 | 0.1676698192601208 | 0.3942354469062935 | T | T | T |
| 0.3961570490452032 | 0.1580324015651434 | 0.1986009212534335 | T | T | T |
| 0.2713339009562781 | 0.1498511108104753 | 0.2579635796567900 | T | T | T |
| 0.1837879801050374 | 0.0496193584413835 | 0.2768287042203639 | T | T | T |
| 0.4166530208248144 | 0.0477936699172692 | 0.3080417490045430 | T | T | T |
| 0.0666369079896993 | 0.8705778745486127 | 0.0851438905077637 | T | T | T |
| 0.0870353021278174 | 0.0011809828449747 | 0.0709887708921820 | T | T | T |
| 0.1106116453848942 | 0.1324617729776348 | 0.0672827442682669 | T | T | T |
| 0.3044715077145545 | 0.8638704499151205 | 0.1167564534383029 | T | T | T |
| 0.3136530124656076 | 0.9956852198727200 | 0.0827825160142632 | T | T | T |
| 0.3013037501293440 | 0.1281866897258807 | 0.0649905633109649 | T | T | T |
| 0.5139885078084255 | 0.9556109081010041 | 0.2884615690234237 | T | T | T |
| 0.5157377483709764 | 0.1339675736144649 | 0.2773742167148998 | T | T | T |
| 0.6341303737380274 | 0.5598626047157523 | 0.2698144903757632 | T | T | T |
| 0.7030009043150064 | 0.5722672079576314 | 0.1047611154904762 | T | T | T |
| 0.7932197632408982 | 0.5632332713806190 | 0.9553822091691203 | T | T | T |
| 0.8804448073359857 | 0.5768865552374427 | 0.1065040065713321 | T | T | T |
| 0.8863970926829015 | 0.5254509166330092 | 0.3151385970809445 | T | T | T |
| 0.7591327632902601 | 0.5214692863727529 | 0.2666195645398078 | T | T | T |
| 0.6416543484576012 | 0.3354815621002610 | 0.2678260472653899 | T | T | T |
| 0.6912600119332442 | 0.3313085291556007 | 0.0861984115214705 | T | T | T |
| 0.8079936784951048 | 0.3502640442553911 | 0.9940345783230893 | T | T | T |
| 0.9117897306531841 | 0.3187187605334948 | 0.1109320466723447 | T | T | T |
| 0.9092002136618714 | 0.3623831798059269 | 0.3005288325134285 | T | T | T |
| 0.7691635982350175 | 0.3667993582540285 | 0.2395861230796811 | T | T | T |
| 0.6714613379995998 | 0.4482387208639722 | 0.1729603471690965 | T | T | T |
| 0.9246692823431892 | 0.4476192838316301 | 0.1499836399161663 | T | T | T |
| 0.5711579679862432 | 0.6264356335907996 | 0.4112242422928393 | T | T | T |
| 0.5919318846068604 | 0.4969489015697227 | 0.4358920126936470 | T | T | T |
| 0.5826368612116484 | 0.3630079420912430 | 0.4420076121111237 | T | T | T |
| 0.8049351856263549 | 0.6285172687640035 | 0.3702432845048591 | T | T | T |
| 0.7967213490442779 | 0.5125941711694358 | 0.4595290050381807 | T | T | T |
| 0.8232377334119070 | 0.3855245949581255 | 0.4361599053480774 | T | T | T |
| 0.0225934094012567 | 0.3633569695897218 | 0.2038307114561657 | T | T | T |
| 0.8557437598173383 | 0.4331889670531043 | 0.7919845140517182 | T | T | T |



**Structure files (CONTCAR) involved in this work:**

|                    |                    |                    |   |   |   |
|--------------------|--------------------|--------------------|---|---|---|
| 0.7941895217025543 | 0.4307197770669485 | 0.6156616286623920 | T | T | T |
| 0.6973966729463085 | 0.4225203372202276 | 0.4755644814701211 | T | T | T |
| 0.5998413558543586 | 0.4308000646773216 | 0.6088537867290600 | T | T | T |
| 0.6014215940159159 | 0.4417649361805208 | 0.8064390108735380 | T | T | T |
| 0.7277282584320697 | 0.4721389600795809 | 0.7723735088963036 | T | T | T |
| 0.8606110877561394 | 0.6791108307652469 | 0.7557091800360634 | T | T | T |
| 0.8153910904085829 | 0.6420329678733682 | 0.5644618757729126 | T | T | T |
| 0.6942407529689829 | 0.6460761309272711 | 0.4816332582021093 | T | T | T |
| 0.5881461248147830 | 0.6658631605823634 | 0.5983518583257021 | T | T | T |
| 0.5942775105308971 | 0.6632223714092870 | 0.7952978635447512 | T | T | T |
| 0.7197257022128040 | 0.6457916030722888 | 0.7394413904037740 | T | T | T |
| 0.8258435010843641 | 0.5466062712890076 | 0.6955098722015127 | T | T | T |
| 0.5812833301051152 | 0.5489068922910902 | 0.6917498943879894 | T | T | T |
| 0.9306580270187059 | 0.3773231288130997 | 0.9316422514675053 | T | T | T |
| 0.9118772434517476 | 0.5101546364059387 | 0.9354526838709092 | T | T | T |
| 0.9014942400991588 | 0.6416771872382100 | 0.9374998440386660 | T | T | T |
| 0.6950902771571308 | 0.3726798095049976 | 0.8969400635839555 | T | T | T |
| 0.6750410035274640 | 0.5016364795518654 | 0.9463893637769621 | T | T | T |
| 0.6836994364562415 | 0.6357705468700098 | 0.9342835003341967 | T | T | T |
| 0.4875975710288047 | 0.4528066741849449 | 0.7117536445043540 | T | T | T |
| 0.4803847707769607 | 0.6338941473617896 | 0.7053577820538334 | T | T | T |
| 0.6446981304702093 | 0.9399686504287852 | 0.2885832028944513 | T | T | T |
| 0.7002415099849838 | 0.9324323679272915 | 0.1107541067383915 | T | T | T |
| 0.8010873377069296 | 0.9435880204299366 | 0.9801134967379678 | T | T | T |
| 0.8998052793426468 | 0.9278585619230013 | 0.1127779774904091 | T | T | T |
| 0.8993198891146768 | 0.9478813137637020 | 0.3103423510003242 | T | T | T |
| 0.7730400664254943 | 0.9663900827797314 | 0.2669101581292236 | T | T | T |
| 0.6415734247162016 | 0.1722642566675011 | 0.2535921263406189 | T | T | T |
| 0.6978228677098117 | 0.1576239698449882 | 0.0792142883568873 | T | T | T |
| 0.8106715805638968 | 0.1463408189555159 | 0.9779456665293728 | T | T | T |
| 0.9139534360284449 | 0.1678344458670853 | 0.0972537100356147 | T | T | T |
| 0.8988608671527082 | 0.1555987082873622 | 0.2943791287873855 | T | T | T |
| 0.7720472792214002 | 0.1459794487762892 | 0.2431762344301298 | T | T | T |
| 0.6826332618548748 | 0.0519143896907545 | 0.1974434442484390 | T | T | T |
| 0.9207784007552440 | 0.0483713843321373 | 0.1815897488984290 | T | T | T |
| 0.5714334627347677 | 0.8741274569613148 | 0.4198228146116190 | T | T | T |
| 0.5836116907888677 | 0.0057535832034483 | 0.4389332315159589 | T | T | T |
| 0.5989364615258197 | 0.1379938758646029 | 0.4350608818950378 | T | T | T |
| 0.8108112056323921 | 0.8697382097425499 | 0.3956599417894186 | T | T | T |
| 0.8176159177083797 | 0.9978394793261263 | 0.4483654604843396 | T | T | T |
| 0.8079548087944470 | 0.1318387443721879 | 0.4345870573817859 | T | T | T |
| 0.0121586641888151 | 0.9529745484250869 | 0.2165964040298322 | T | T | T |
| 0.0172795356846030 | 0.1372515029684333 | 0.2120065584095943 | T | T | T |
| 0.8581723494444292 | 0.0558334864646826 | 0.7860402842879889 | T | T | T |
| 0.8018100272178659 | 0.0715926609459398 | 0.6094369572644193 | T | T | T |
| 0.7017131864012981 | 0.0577086266687396 | 0.4781535300964705 | T | T | T |
| 0.6012395327854417 | 0.0748910247906484 | 0.6072764304940800 | T | T | T |
| 0.6043276643015620 | 0.0504074313608028 | 0.8042895343015490 | T | T | T |
| 0.7299346829711643 | 0.0277685547233562 | 0.7622194026129595 | T | T | T |
| 0.8596571735842109 | 0.8337053040797451 | 0.7653489069240164 | T | T | T |
| 0.8059853800269248 | 0.8324889455531581 | 0.5884634609180819 | T | T | T |
| 0.6945890049152084 | 0.8501746413578293 | 0.4844236625605214 | T | T | T |
| 0.5910218039687245 | 0.8279133038108789 | 0.6045515888275171 | T | T | T |

**Structure files (CONTCAR) involved in this work:**

|                    |                    |                    |   |   |   |
|--------------------|--------------------|--------------------|---|---|---|
| 0.6032583576397476 | 0.8516662022107205 | 0.7987179384321491 | T | T | T |
| 0.7300790436015652 | 0.8599875503091410 | 0.7464135454228860 | T | T | T |
| 0.8204354503384284 | 0.9483399190526735 | 0.6822962034128351 | T | T | T |
| 0.5810567064481501 | 0.9523527500753952 | 0.6715731419421245 | T | T | T |
| 0.9332155827729898 | 0.1271362136736222 | 0.9092537176512240 | T | T | T |
| 0.9184188336589048 | 0.9973636601272621 | 0.9436668341477356 | T | T | T |
| 0.9065007382355035 | 0.8645832118734529 | 0.9434776173456719 | T | T | T |
| 0.6953142839702859 | 0.1286789144785358 | 0.8847082533282955 | T | T | T |
| 0.6849134436578497 | 0.0026710872452899 | 0.9457645223706699 | T | T | T |
| 0.6951904577222054 | 0.8686637529162484 | 0.9392872229990800 | T | T | T |
| 0.4905241841561220 | 0.0472268039750705 | 0.7135596069628056 | T | T | T |
| 0.4852168909997135 | 0.8642530370912039 | 0.7122963221603069 | T | T | T |
| 0.3563921259597776 | 0.4345150426432706 | 0.7048251912262882 | T | T | T |
| 0.3090575833588161 | 0.4346462549037233 | 0.8882927334311425 | T | T | T |
| 0.2038156278357179 | 0.4565083613952520 | 0.0079065732878502 | T | T | T |
| 0.0967187941696687 | 0.4315551868884014 | 0.8967611079394637 | T | T | T |
| 0.0996157914006201 | 0.4397778031413986 | 0.6978648430278782 | T | T | T |
| 0.2272564932661880 | 0.4610365555630345 | 0.7397877065970079 | T | T | T |
| 0.3553940135440927 | 0.6730694356019202 | 0.7335969151200383 | T | T | T |
| 0.3050018110920076 | 0.6507581001920437 | 0.9094090623934653 | T | T | T |
| 0.1919936891950702 | 0.6462017993912440 | 0.0115672842144734 | T | T | T |
| 0.0910294085207016 | 0.6705174773963218 | 0.8883369135887250 | T | T | T |
| 0.1015778604869016 | 0.6554374838978148 | 0.6925281364029701 | T | T | T |
| 0.2268832059056529 | 0.6426227566248987 | 0.7494591384646945 | T | T | T |
| 0.3207301743731150 | 0.5497391929732612 | 0.7843478736393296 | T | T | T |
| 0.0813916513613954 | 0.5488782724999418 | 0.8083369493060416 | T | T | T |
| 0.4341006740433542 | 0.3761447197310754 | 0.5708031029470700 | T | T | T |
| 0.4202327245613480 | 0.5078460730344917 | 0.5637407339931478 | T | T | T |
| 0.3944705484169166 | 0.6385550776435004 | 0.5522168259006924 | T | T | T |
| 0.1931484736382799 | 0.3657017364430590 | 0.6105911080729476 | T | T | T |
| 0.1779332804852628 | 0.4948662705465565 | 0.5613532719155969 | T | T | T |
| 0.1945929565197557 | 0.6282836978213271 | 0.5565690536689983 | T | T | T |
| 0.9855385832204435 | 0.4550210967355962 | 0.7923817157016240 | T | T | T |
| 0.9841796292517744 | 0.6369839510663782 | 0.7792743339889887 | T | T | T |
| 0.1405952680973464 | 0.5683564156529161 | 0.2158440724965713 | T | T | T |
| 0.1997083671533119 | 0.5575808887147810 | 0.3912525568810186 | T | T | T |
| 0.2973879704154505 | 0.5467213424053147 | 0.5272574142146085 | T | T | T |
| 0.3917734899593056 | 0.5671466562455740 | 0.3899425520037418 | T | T | T |
| 0.3981763568264386 | 0.5584283065255471 | 0.1932205292430320 | T | T | T |
| 0.2705516113307329 | 0.5377374269316442 | 0.2295823205398425 | T | T | T |
| 0.1443200070709142 | 0.3227069252072534 | 0.2438216467558329 | T | T | T |
| 0.1963587523150583 | 0.3566765562074373 | 0.4156417747958815 | T | T | T |
| 0.3099046674779330 | 0.3526099420283103 | 0.5153414594604449 | T | T | T |
| 0.4094020428785571 | 0.3282499330225426 | 0.3877684526369467 | T | T | T |
| 0.3960887014090297 | 0.3413731132620239 | 0.1906676919684773 | T | T | T |
| 0.2726972065014865 | 0.3538986964219718 | 0.2532509591697770 | T | T | T |
| 0.1786031003428154 | 0.4487039777017974 | 0.2770634899047389 | T | T | T |
| 0.4105255653826086 | 0.4487152977240965 | 0.3071453233867123 | T | T | T |
| 0.0681959290742954 | 0.6239120409097535 | 0.0718479181753130 | T | T | T |
| 0.0842784612453985 | 0.4924815672134544 | 0.0735724660948023 | T | T | T |
| 0.1154586089090598 | 0.3626242135230333 | 0.0593290150016360 | T | T | T |
| 0.3086957208123165 | 0.6339784045220390 | 0.1039525670334172 | T | T | T |
| 0.3224724816336267 | 0.5042980106653011 | 0.0533771007082884 | T | T | T |

**Structure files (CONTCAR) involved in this work:**

|                     |                    |                    |   |   |   |
|---------------------|--------------------|--------------------|---|---|---|
| 0.3001655972282201  | 0.3708620544877030 | 0.0592444735559018 | T | T | T |
| 0.5068494891560376  | 0.5397013274374154 | 0.2968573289067785 | T | T | T |
| 0.5125669298139268  | 0.3643906759986464 | 0.2737369469147846 | T | T | T |
| 0.4383718409796687  | 0.7509377268082975 | 0.6338975675506294 | T | T | T |
| 0.1910274490450945  | 0.7480839805791604 | 0.6365726102344207 | T | T | T |
| 0.2744126648684516  | 0.7509649813110800 | 0.0297636015856387 | T | T | T |
| 0.1091785075642708  | 0.7484268054359129 | 0.0454811525175922 | T | T | T |
| 0.0668716685785723  | 0.2484482640075446 | 0.1289251774985667 | T | T | T |
| 0.3068641203013555  | 0.2497291946429011 | 0.1363666791017851 | T | T | T |
| 0.2244768565918337  | 0.2501894986175698 | 0.5273795242045922 | T | T | T |
| 0.3943971651123983  | 0.2509008899633254 | 0.5454615446627648 | T | T | T |
| 0.5569091041430355  | 0.2496980125656661 | 0.3522127665921567 | T | T | T |
| 0.8149264477134541  | 0.2510685179068541 | 0.3515225399234590 | T | T | T |
| 0.7278922053732683  | 0.2490948406766134 | 0.9409598071961839 | T | T | T |
| 0.8918902948115685  | 0.2504886068914453 | 0.9460471581576465 | T | T | T |
| 0.9467101004592019  | 0.7533372209700960 | 0.8580726105428418 | T | T | T |
| 0.6867286303659028  | 0.7530718154754545 | 0.8484682633544786 | T | T | T |
| 0.7782076552250069  | 0.7472773427309106 | 0.4460364169339411 | T | T | T |
| 0.6115455742109606  | 0.7492060437141942 | 0.4488145228696069 | T | T | T |
| 0.9304597742335515  | 0.4848042200819392 | 0.5212096627818238 | T | T | T |
| 0.9116998997075677  | 0.4382525618433687 | 0.3960129778921712 | T | T | T |
| 0.8688160884432646  | 0.5546810485444496 | 0.5605555133938017 | T | T | T |
| 0.0541410228097639  | 0.5754212374953561 | 0.5208953840302381 | T | T | T |
| 0.0628517860587865  | 0.5473866526545982 | 0.3952159543338554 | T | T | T |
| -0.0150103218694603 | 0.5776092065579310 | 0.4356754612711689 | T | T | T |
| 0.0353287678751574  | 0.6938394279622123 | 0.4619961906094291 | T | T | T |
| 0.0381814004724032  | 0.6666453653211014 | 0.3352480195629715 | T | T | T |
| 0.1114339288436574  | 0.6642443984845682 | 0.4099386497316924 | T | T | T |
| 0.9766966946662020  | 0.4894928227803843 | 0.5428713388992472 | T | T | T |
| 0.0391118752885458  | 0.5854360058387639 | 0.4429932767632623 | T | T | T |
| 0.0571700334614655  | 0.6566011467286149 | 0.4108171556556146 | T | T | T |

**Figure S13 IS**

Si Al O Ga H C

|                     |                     |                     |
|---------------------|---------------------|---------------------|
| 1.0000000000000000  |                     |                     |
| 20.0219999999999985 | 0.0000000000000000  | 0.0000000000000000  |
| 0.0000000000000000  | 19.8990000000000009 | 0.0000000000000000  |
| 0.0000000000000000  | 0.0000000000000000  | 13.3829999999999991 |

93 3 192 1 8 2

Selective dynamics

Direct

|                    |                    |                    |   |   |   |
|--------------------|--------------------|--------------------|---|---|---|
| 0.4217625114217803 | 0.0571316731531257 | 0.6480159568529367 | T | T | T |
| 0.3008518239840862 | 0.0268975960406150 | 0.7894533968336082 | T | T | T |
| 0.2793276416556988 | 0.0606232001702559 | 0.0125809973617153 | T | T | T |
| 0.1195796408997815 | 0.0638885128318348 | 0.0130419328983896 | T | T | T |
| 0.0669355439722228 | 0.0297679133138491 | 0.7999277749528817 | T | T | T |
| 0.1761350388175154 | 0.0558977702568951 | 0.6514200176988807 | T | T | T |
| 0.4193210260267908 | 0.8271594521925392 | 0.6706409602374770 | T | T | T |
| 0.3014602216172268 | 0.8685188677495121 | 0.8097206713209699 | T | T | T |
| 0.2668662879468039 | 0.8283937237389981 | 0.0299015682814601 | T | T | T |
| 0.1118542383068504 | 0.8265991156279878 | 0.0171362476460018 | T | T | T |
| 0.0615138223938569 | 0.8707576220033258 | 0.8028182026453696 | T | T | T |
| 0.1788854757316222 | 0.8278750700878068 | 0.6736658263832743 | T | T | T |
| 0.0750031613111867 | 0.9429380944475266 | 0.1506888906834130 | T | T | T |

**Structure files (CONTCAR) involved in this work:**

|                    |                    |                    |   |   |   |
|--------------------|--------------------|--------------------|---|---|---|
| 0.1958285221899793 | 0.9730827983537143 | 0.2933117607621503 | T | T | T |
| 0.2165954473035920 | 0.9369094961735681 | 0.5145343763150737 | T | T | T |
| 0.3762150969996130 | 0.9338017747038828 | 0.5155881386099957 | T | T | T |
| 0.4297966725928468 | 0.9694515459250157 | 0.3045135695330739 | T | T | T |
| 0.3202064744015302 | 0.9450091006429359 | 0.1553444878884861 | T | T | T |
| 0.0780922381494142 | 0.1730862017300949 | 0.1653067122787588 | T | T | T |
| 0.1955079224221746 | 0.1304323198821972 | 0.3075107415479221 | T | T | T |
| 0.2307064936064978 | 0.1731724075205135 | 0.5247209757699981 | T | T | T |
| 0.3852952509712743 | 0.1737404411126145 | 0.5122357798188041 | T | T | T |
| 0.4363432105333241 | 0.1277907988876602 | 0.3018406490218481 | T | T | T |
| 0.3183743154602628 | 0.1674986274176007 | 0.1714794209709753 | T | T | T |
| 0.5834991385718369 | 0.5544523200863286 | 0.3500941573982955 | T | T | T |
| 0.6960133056305616 | 0.5278876008440769 | 0.1882349915907507 | T | T | T |
| 0.7145003204283353 | 0.5657141880992582 | 0.9757413231573598 | T | T | T |
| 0.8728151348129400 | 0.5645671496524511 | 0.9852862940486656 | T | T | T |
| 0.9331281298019087 | 0.5315155663128673 | 0.1918221485438411 | T | T | T |
| 0.5760601710460881 | 0.3298347319064399 | 0.3343510319999389 | T | T | T |
| 0.7007361441839693 | 0.3737871741829705 | 0.2019514407397402 | T | T | T |
| 0.7302239156479061 | 0.3259705772680557 | 0.9880571202542413 | T | T | T |
| 0.8822636863116101 | 0.3277035128889537 | 0.9860829632330312 | T | T | T |
| 0.9350962403119467 | 0.3738479701900479 | 0.1975464403577158 | T | T | T |
| 0.9293160783832016 | 0.4425552192684211 | 0.8574788959362852 | T | T | T |
| 0.7820155874403817 | 0.4384819782044380 | 0.4905840323370984 | T | T | T |
| 0.6227231249826489 | 0.4309961994265287 | 0.4926946182225249 | T | T | T |
| 0.5675194463158876 | 0.4680955701340466 | 0.7060183502094138 | T | T | T |
| 0.6703780383318920 | 0.4364505132815189 | 0.8571398269062245 | T | T | T |
| 0.9182327148380869 | 0.6727882090580583 | 0.8305684143536137 | T | T | T |
| 0.8001435368066917 | 0.6344588733046471 | 0.6936045819485870 | T | T | T |
| 0.7667068054626879 | 0.6694368701805137 | 0.4769087068507850 | T | T | T |
| 0.6114964450454282 | 0.6711205847992198 | 0.4868084242125444 | T | T | T |
| 0.5631710290397195 | 0.6264016229428481 | 0.7031817107420947 | T | T | T |
| 0.6818276525854132 | 0.6811090512292955 | 0.8223700690525123 | T | T | T |
| 0.5742186443466795 | 0.9431949170466482 | 0.3647225902834073 | T | T | T |
| 0.6932420218691090 | 0.9725924140154841 | 0.2206153524801653 | T | T | T |
| 0.7176823593696399 | 0.9409581326140425 | 0.9995583420224631 | T | T | T |
| 0.8775327883627706 | 0.9340484684838251 | 0.9953415969363263 | T | T | T |
| 0.9305703368332807 | 0.9695540695513584 | 0.2057433535455162 | T | T | T |
| 0.8190171701190273 | 0.9432692714552592 | 0.3545177325550762 | T | T | T |
| 0.5803178663150107 | 0.1745485687569756 | 0.3346596692537022 | T | T | T |
| 0.6960521222537985 | 0.1286515437821219 | 0.1973445987949862 | T | T | T |
| 0.7308234567046197 | 0.1706471552762025 | 0.9768111897983718 | T | T | T |
| 0.8851135927136776 | 0.1734263153033387 | 0.9938814570473402 | T | T | T |
| 0.9338750396114495 | 0.1276855348405718 | 0.2047380116837487 | T | T | T |
| 0.8168162617309065 | 0.1660228014034935 | 0.3350678968229260 | T | T | T |
| 0.9228750821093865 | 0.0576169158869177 | 0.8619550217351069 | T | T | T |
| 0.8038351611530357 | 0.0284969431034033 | 0.7213367768260680 | T | T | T |
| 0.7797176624737213 | 0.0596274110460457 | 0.4971044099838492 | T | T | T |
| 0.6200511444177181 | 0.0676995082721609 | 0.4939234465975104 | T | T | T |
| 0.5667289402471734 | 0.0318196936436277 | 0.7020062483368258 | T | T | T |
| 0.6769769161823950 | 0.0548834133680885 | 0.8537694265308161 | T | T | T |
| 0.9174497303029259 | 0.8256970131720556 | 0.8390968082417550 | T | T | T |
| 0.8024344314791688 | 0.8728180402008539 | 0.7028062035388203 | T | T | T |
| 0.7663755145418857 | 0.8303545742086892 | 0.4848714361747349 | T | T | T |

**Structure files (CONTCAR) involved in this work:**

|                    |                    |                    |   |   |   |
|--------------------|--------------------|--------------------|---|---|---|
| 0.6116768805128765 | 0.8258516101784532 | 0.4974686849720733 | T | T | T |
| 0.5619611908174859 | 0.8754040040685038 | 0.7036334507678144 | T | T | T |
| 0.6779567926327662 | 0.8372837152315811 | 0.8369342973446436 | T | T | T |
| 0.4223031725780143 | 0.4452286822130092 | 0.6403688127002886 | T | T | T |
| 0.3036154587841733 | 0.4740397863808065 | 0.7889712580901731 | T | T | T |
| 0.2860437581141956 | 0.4341293092621578 | 0.0084805954183628 | T | T | T |
| 0.1295374899917464 | 0.4325925919646468 | 0.0061242430696074 | T | T | T |
| 0.0770131515221750 | 0.4725495239501168 | 0.8000942514476024 | T | T | T |
| 0.1817397271591458 | 0.4497587521202127 | 0.6460352778276252 | T | T | T |
| 0.4230143101433802 | 0.6723579290862542 | 0.6646425005555329 | T | T | T |
| 0.3008408349485358 | 0.6305144936521080 | 0.7999302264787955 | T | T | T |
| 0.2695180657996878 | 0.6724235427748673 | 0.0188381084458909 | T | T | T |
| 0.1154318304126699 | 0.6738092931493876 | 0.0082025964287717 | T | T | T |
| 0.0655979570561262 | 0.6296500745727344 | 0.7999670761899056 | T | T | T |
| 0.1786932026075987 | 0.6692525480319481 | 0.6634687656736865 | T | T | T |
| 0.0793774892745572 | 0.5539556048172022 | 0.1351323144072342 | T | T | T |
| 0.2003952124495957 | 0.5285383845910858 | 0.2804898739509322 | T | T | T |
| 0.2214348085142087 | 0.5677051552298762 | 0.5020736207644027 | T | T | T |
| 0.3823873291479920 | 0.5698845806638482 | 0.5046696790353936 | T | T | T |
| 0.4346295964867440 | 0.5280727410584491 | 0.2964792111256764 | T | T | T |
| 0.3283192199289402 | 0.5530552103143682 | 0.1432494190715018 | T | T | T |
| 0.0810967566171372 | 0.3281481234037653 | 0.1569345114360831 | T | T | T |
| 0.1958489426237780 | 0.3701925265474387 | 0.3039341098219019 | T | T | T |
| 0.2314848306629194 | 0.3300550246561881 | 0.5231241479963814 | T | T | T |
| 0.3857375967867488 | 0.3271600716730514 | 0.5097772345957680 | T | T | T |
| 0.4331989240262367 | 0.3710640434037332 | 0.2961243597372128 | T | T | T |
| 0.3171120545079662 | 0.3260431392878906 | 0.1668241603428840 | T | T | T |
| 0.8101021350608136 | 0.5596476623559010 | 0.3329203387329285 | T | T | T |
| 0.8230753903915393 | 0.3254073643380351 | 0.3272452761571265 | T | T | T |
| 0.7957242781003959 | 0.4729192272065367 | 0.7261657018228767 | T | T | T |
| 0.3563607834810450 | 0.0622954830238318 | 0.7190315847121644 | T | T | T |
| 0.2993776079575198 | 0.0659945900138036 | 0.8956948465105760 | T | T | T |
| 0.1991758429067987 | 0.0513944578053835 | 0.0271898377059136 | T | T | T |
| 0.1001187146336434 | 0.0670840291924913 | 0.8958758868417556 | T | T | T |
| 0.1013178619541824 | 0.0574194993381639 | 0.6980475992485348 | T | T | T |
| 0.2276179923555721 | 0.0325736770472301 | 0.7385432602098780 | T | T | T |
| 0.3571239708493272 | 0.8265299538664900 | 0.7482467473628107 | T | T | T |
| 0.3039330842596917 | 0.8433797960749848 | 0.9246123137508718 | T | T | T |
| 0.1891381863359141 | 0.8519972961105988 | 0.0206161974419188 | T | T | T |
| 0.0837261276294928 | 0.8321132722367951 | 0.9042267426598881 | T | T | T |
| 0.1014870968899403 | 0.8380109375961073 | 0.7084354771746517 | T | T | T |
| 0.2275480520561063 | 0.8546903811220877 | 0.7629292350333703 | T | T | T |
| 0.3192246476187917 | 0.9480394128494962 | 0.8044382180108520 | T | T | T |
| 0.0803146882181888 | 0.9496593928129481 | 0.8118320680964003 | T | T | T |
| 0.4296807085342577 | 0.1266391964629304 | 0.5852950169371706 | T | T | T |
| 0.4161066488117119 | 0.9948313922231355 | 0.5696874121772089 | T | T | T |
| 0.3969525203577314 | 0.8627614797245136 | 0.5664779207769348 | T | T | T |
| 0.1936959108360338 | 0.1307911329776689 | 0.6117974729032976 | T | T | T |
| 0.1786294579729420 | 0.0025506165597299 | 0.5594402997510355 | T | T | T |
| 0.1926288986819947 | 0.8686453250466671 | 0.5705875176823810 | T | T | T |
| 0.9877674791200007 | 0.0460115070526322 | 0.7913776294932984 | T | T | T |
| 0.9815175816443742 | 0.8620887310928651 | 0.7864579152889389 | T | T | T |
| 0.1410209870458380 | 0.9390290731496788 | 0.2203376727829210 | T | T | T |

**Structure files (CONTCAR) involved in this work:**

|                    |                    |                    |   |   |   |
|--------------------|--------------------|--------------------|---|---|---|
| 0.1972602645853440 | 0.9308651494923577 | 0.3971593638678459 | T | T | T |
| 0.2965825029914771 | 0.9468195538322270 | 0.5293318766313246 | T | T | T |
| 0.3957930459781276 | 0.9301226652953111 | 0.3982954206284768 | T | T | T |
| 0.3952048096569464 | 0.9451643962920364 | 0.2008931282105763 | T | T | T |
| 0.2691664853143994 | 0.9702492363460939 | 0.2420625993584609 | T | T | T |
| 0.1412837450757899 | 0.1707162092100550 | 0.2408383220557327 | T | T | T |
| 0.1931739255620447 | 0.1624693608323793 | 0.4185904764119042 | T | T | T |
| 0.3078858583158404 | 0.1481561644464656 | 0.5147962331877709 | T | T | T |
| 0.4133423989282779 | 0.1708885270530099 | 0.3989227144954871 | T | T | T |
| 0.3957499099329163 | 0.1553016878976275 | 0.2044171352988571 | T | T | T |
| 0.2699134883930028 | 0.1391451585153819 | 0.2600496598477774 | T | T | T |
| 0.1761578484443134 | 0.0512198795097824 | 0.3131775919138109 | T | T | T |
| 0.4182122539300246 | 0.0494708901223999 | 0.3212301985100586 | T | T | T |
| 0.0668139369241867 | 0.8717265498648343 | 0.0921694107605409 | T | T | T |
| 0.0800383031030326 | 0.0028931301870796 | 0.0681811563627100 | T | T | T |
| 0.0974592755512924 | 0.1350956765442151 | 0.0618909207226370 | T | T | T |
| 0.3024291402604641 | 0.8691873397607650 | 0.1199456185327847 | T | T | T |
| 0.3166104704630736 | 0.9953691028635426 | 0.0598247708583942 | T | T | T |
| 0.3034225776042753 | 0.1292028184455612 | 0.0669445922324480 | T | T | T |
| 0.5086467492113212 | 0.9524002313440855 | 0.2948534924974733 | T | T | T |
| 0.5161410197284142 | 0.1369204516766787 | 0.2839402519267000 | T | T | T |
| 0.6451525413430973 | 0.5573455976182553 | 0.2727608614832548 | T | T | T |
| 0.6839254005590828 | 0.5726219902339739 | 0.0874845569095255 | T | T | T |
| 0.7942025101501938 | 0.5467352654234492 | 0.9822386631917249 | T | T | T |
| 0.9006680835530081 | 0.5720587074268597 | 0.0996029982710959 | T | T | T |
| 0.9017011580766389 | 0.5648577175199361 | 0.2990292971311539 | T | T | T |
| 0.7722551967174657 | 0.5359967289166256 | 0.2242488617697273 | T | T | T |
| 0.6405965500429894 | 0.3384973965046862 | 0.2643066346639538 | T | T | T |
| 0.7143843921172794 | 0.3250099361416479 | 0.1064123854574534 | T | T | T |
| 0.8061962079899012 | 0.3544026226168720 | 0.9676357800077686 | T | T | T |
| 0.9021229099103095 | 0.3351444065753669 | 0.1026770922064974 | T | T | T |
| 0.9066710203248847 | 0.3412264641951607 | 0.2986076169274482 | T | T | T |
| 0.7673919180642523 | 0.3771453026468419 | 0.2682114933853272 | T | T | T |
| 0.6781295741657458 | 0.4488867054363566 | 0.1656746184129798 | T | T | T |
| 0.9135744552512071 | 0.4535088327794943 | 0.1906620956227571 | T | T | T |
| 0.5723296325151940 | 0.6273142266580019 | 0.4025186404287308 | T | T | T |
| 0.6001026110755048 | 0.4999774909271099 | 0.4378220404200882 | T | T | T |
| 0.5865168521360874 | 0.3670278818995116 | 0.4416099784794064 | T | T | T |
| 0.7964605612156277 | 0.6396351934591757 | 0.3751885832021805 | T | T | T |
| 0.8061115453616066 | 0.5014943298948408 | 0.4284689999574703 | T | T | T |
| 0.8272361099684225 | 0.3696439796983494 | 0.4503710540217505 | T | T | T |
| 0.0126182212782042 | 0.5435189841382556 | 0.2031438680283874 | T | T | T |
| 0.0162808141002814 | 0.3710606967136169 | 0.1923961775287616 | T | T | T |
| 0.8739494583297989 | 0.4381236814559888 | 0.7677063291348141 | T | T | T |
| 0.8103271761515262 | 0.4399132044212448 | 0.6046525091437753 | T | T | T |
| 0.7038713734491022 | 0.4207542279807568 | 0.4844574141222932 | T | T | T |
| 0.6012776667235148 | 0.4330475902854258 | 0.6087021645432198 | T | T | T |
| 0.5963912738359248 | 0.4335135894007430 | 0.8064324422098074 | T | T | T |
| 0.7278342430166473 | 0.4335050606162137 | 0.7740066014962886 | T | T | T |
| 0.8635301670935434 | 0.6744808706095784 | 0.7421085961101392 | T | T | T |
| 0.8083251477719624 | 0.6403815710820776 | 0.5728990581099873 | T | T | T |
| 0.6888097044339305 | 0.6470283770827832 | 0.4921756590638689 | T | T | T |
| 0.5772210271770349 | 0.6601013663481176 | 0.5950876185042557 | T | T | T |

**Structure files (CONTCAR) involved in this work:**

|                    |                    |                    |   |   |   |
|--------------------|--------------------|--------------------|---|---|---|
| 0.6050878868427776 | 0.6641956883434511 | 0.7906064154317021 | T | T | T |
| 0.7303295772928926 | 0.6715369763803195 | 0.7256023408570759 | T | T | T |
| 0.7997967050164511 | 0.5583199808613860 | 0.7325425178939335 | T | T | T |
| 0.5848206508010160 | 0.5479066065545600 | 0.7022947495587448 | T | T | T |
| 0.9333196378972449 | 0.3722443905773186 | 0.9180862627105760 | T | T | T |
| 0.9146612877684576 | 0.5035428351732153 | 0.9336203731362297 | T | T | T |
| 0.8893202076075388 | 0.6342537014739889 | 0.9286356194857680 | T | T | T |
| 0.6759597914401270 | 0.3723327453789175 | 0.9318412561797600 | T | T | T |
| 0.6745583150113121 | 0.5064986195727632 | 0.9193839157699045 | T | T | T |
| 0.7059627704552832 | 0.6360585634466596 | 0.9165156573647005 | T | T | T |
| 0.4873239963032256 | 0.4575973546373747 | 0.7088451450305536 | T | T | T |
| 0.4832771686102760 | 0.6348632575903737 | 0.7250124571489504 | T | T | T |
| 0.6396914465948996 | 0.9366567188142144 | 0.2940556578881401 | T | T | T |
| 0.6942074765890944 | 0.9330981898015196 | 0.1146630766038492 | T | T | T |
| 0.7981839558429960 | 0.9499745279203746 | 0.9904462205533255 | T | T | T |
| 0.9017213644983062 | 0.9278734421081087 | 0.1105479047219599 | T | T | T |
| 0.8938914665555336 | 0.9450189141809821 | 0.3075915525926574 | T | T | T |
| 0.7675198082953989 | 0.9686563000132588 | 0.2686781796603368 | T | T | T |
| 0.6424417986846274 | 0.1743890758784193 | 0.2572838669466519 | T | T | T |
| 0.6952027791850108 | 0.1541533210793287 | 0.0825982978719392 | T | T | T |
| 0.8086361007436134 | 0.1465986686187238 | 0.9841455431985530 | T | T | T |
| 0.9087812759233408 | 0.1720616453155484 | 0.1097292913003349 | T | T | T |
| 0.8950470091710371 | 0.1524415244436056 | 0.3044887167345397 | T | T | T |
| 0.7703526122007525 | 0.1346465395559311 | 0.2454583067809733 | T | T | T |
| 0.6720769695856560 | 0.0505530902801947 | 0.2038103916908784 | T | T | T |
| 0.9179822242058755 | 0.0488702097369061 | 0.1838938807965086 | T | T | T |
| 0.5651932622727813 | 0.8746452650767006 | 0.4294789970514000 | T | T | T |
| 0.5791528760890129 | 0.0068279576798643 | 0.4407161281948850 | T | T | T |
| 0.6020526786115361 | 0.1378820171039848 | 0.4383373766472756 | T | T | T |
| 0.8017836968816001 | 0.8670655799041379 | 0.3899374844403042 | T | T | T |
| 0.8155552999877121 | 0.9932810598582770 | 0.4504144584639940 | T | T | T |
| 0.8028201450781696 | 0.1273407813785168 | 0.4402416983750070 | T | T | T |
| 0.0099022768816215 | 0.9547382740613647 | 0.2205237133073369 | T | T | T |
| 0.0140683966983829 | 0.1382119302393647 | 0.2193738676192533 | T | T | T |
| 0.8571159016392667 | 0.0671997210201815 | 0.7923268357554676 | T | T | T |
| 0.8022292560585145 | 0.0652111787550650 | 0.6133158200091562 | T | T | T |
| 0.6991975262817821 | 0.0509204795014761 | 0.4866710643205174 | T | T | T |
| 0.5976242448414844 | 0.0754370112606970 | 0.6100657237321396 | T | T | T |
| 0.6023543883975297 | 0.0516306559499617 | 0.8068424829174637 | T | T | T |
| 0.7292475691148407 | 0.0304577154997730 | 0.7684143468346962 | T | T | T |
| 0.8549904724518279 | 0.8255602681162518 | 0.7621725262457004 | T | T | T |
| 0.8044690199855816 | 0.8530821492234125 | 0.5860830523860013 | T | T | T |
| 0.6883102700333303 | 0.8528907353324742 | 0.4914366232569742 | T | T | T |
| 0.5863183335529583 | 0.8269239529270247 | 0.6128670083277992 | T | T | T |
| 0.6012623032089509 | 0.8545091042535919 | 0.8052533137229420 | T | T | T |
| 0.7274730699106958 | 0.8626274166598759 | 0.7474996050298099 | T | T | T |
| 0.8268001767386070 | 0.9503382112739555 | 0.7143785109950844 | T | T | T |
| 0.5786115075721033 | 0.9529303706154296 | 0.6752060945948508 | T | T | T |
| 0.9336263757924668 | 0.1259581407837336 | 0.9268636048750466 | T | T | T |
| 0.9167107624825721 | 0.9943837579797854 | 0.9383677639268767 | T | T | T |
| 0.8959189398565085 | 0.8630612739355654 | 0.9420881933692143 | T | T | T |
| 0.6931147052703118 | 0.1313478100539858 | 0.8870534766587613 | T | T | T |
| 0.6815495982886461 | 0.0066141907351184 | 0.9515595023037866 | T | T | T |

**Structure files (CONTCAR) involved in this work:**

|                    |                    |                    |   |   |   |
|--------------------|--------------------|--------------------|---|---|---|
| 0.6953586788579367 | 0.8735515648382297 | 0.9416308752055358 | T | T | T |
| 0.4876405508084390 | 0.0473335714415134 | 0.7167607692257990 | T | T | T |
| 0.4819829016841165 | 0.8666290475782017 | 0.7214850207082498 | T | T | T |
| 0.3572651782446716 | 0.4425027283558998 | 0.7121676145020541 | T | T | T |
| 0.3030037240202230 | 0.4289978414664161 | 0.8901750693744176 | T | T | T |
| 0.2072176075902879 | 0.4514300496238374 | 0.0259750929140520 | T | T | T |
| 0.1146080901024864 | 0.4298590587088821 | 0.8869936969038428 | T | T | T |
| 0.1058961206333700 | 0.4535840690062268 | 0.6900961223897081 | T | T | T |
| 0.2304952409831792 | 0.4720639269911657 | 0.7368178149122560 | T | T | T |
| 0.3552238829918536 | 0.6672745146126096 | 0.7300852485773425 | T | T | T |
| 0.3004493950477229 | 0.6683946477929474 | 0.9069772747870127 | T | T | T |
| 0.1920623655038230 | 0.6468147445232024 | 0.0160475387660781 | T | T | T |
| 0.0918732050288227 | 0.6755996508158173 | 0.8922418784046637 | T | T | T |
| 0.1014766103460138 | 0.6551620569025991 | 0.6973906384628727 | T | T | T |
| 0.2274954594414158 | 0.6360134194010956 | 0.7476967907487071 | T | T | T |
| 0.3206079510716531 | 0.5519009619849927 | 0.8158766144646583 | T | T | T |
| 0.0858856403741280 | 0.5520242600263099 | 0.8232751611862902 | T | T | T |
| 0.4307802439200005 | 0.3742806970879528 | 0.5819349447295921 | T | T | T |
| 0.4156938274585267 | 0.5047671848194819 | 0.5579604097269131 | T | T | T |
| 0.4105366794005367 | 0.6380053324827106 | 0.5559571819151762 | T | T | T |
| 0.1954606869533597 | 0.3732163495707750 | 0.6107239831136899 | T | T | T |
| 0.1891180748437183 | 0.5001266146933413 | 0.5511206410325482 | T | T | T |
| 0.1911811767825039 | 0.6345766380679572 | 0.5550588890075666 | T | T | T |
| 0.9985541924776871 | 0.4526722888942999 | 0.7969366343972986 | T | T | T |
| 0.9851507893797161 | 0.6352403380885450 | 0.7882542613250537 | T | T | T |
| 0.1431970925585472 | 0.5607572697237654 | 0.2086148696151727 | T | T | T |
| 0.2010051237395983 | 0.5704117490256083 | 0.3847402800109023 | T | T | T |
| 0.3017492697722964 | 0.5654939536502251 | 0.5169483061118455 | T | T | T |
| 0.4033650716320086 | 0.5715679440594259 | 0.3880842381560416 | T | T | T |
| 0.4021398613155753 | 0.5565397711290935 | 0.1933046579302980 | T | T | T |
| 0.2730843700053135 | 0.5341695898819497 | 0.2282413753339252 | T | T | T |
| 0.1374034518741845 | 0.3315620178443393 | 0.2436375080343440 | T | T | T |
| 0.1934677711736134 | 0.3427076624185033 | 0.4176941940421220 | T | T | T |
| 0.3087942994838254 | 0.3541913078743555 | 0.5124674206927996 | T | T | T |
| 0.4123404876801630 | 0.3294099739998284 | 0.3956829826363897 | T | T | T |
| 0.3937808933449785 | 0.3404036410946206 | 0.2001557313111016 | T | T | T |
| 0.2683294771003236 | 0.3555413696423504 | 0.2540039288640676 | T | T | T |
| 0.1816660940237102 | 0.4505907300825051 | 0.3023113162116630 | T | T | T |
| 0.4136105733301498 | 0.4496485672168422 | 0.3118305899645116 | T | T | T |
| 0.0685829222017955 | 0.6228859307656924 | 0.0723329002114290 | T | T | T |
| 0.0844508359215198 | 0.4909460684117610 | 0.0584655215834390 | T | T | T |
| 0.1107283668371398 | 0.3599831745777354 | 0.0536231396866593 | T | T | T |
| 0.3117428224886464 | 0.6258028631774275 | 0.0948993845709071 | T | T | T |
| 0.3290461680973009 | 0.4948991537064945 | 0.0576861976171868 | T | T | T |
| 0.3027499968667277 | 0.3623258717213316 | 0.0600661576273280 | T | T | T |
| 0.5151874244417459 | 0.5348490773680975 | 0.2911522773823558 | T | T | T |
| 0.5125410386471636 | 0.3628413186620506 | 0.2759600115993435 | T | T | T |
| 0.4408860103190211 | 0.7505923859521166 | 0.6456101859649033 | T | T | T |
| 0.1930344692692127 | 0.7489080970485205 | 0.6523087193186650 | T | T | T |
| 0.2726317093400914 | 0.7493173608506709 | 0.0579420121157749 | T | T | T |
| 0.1078272770310566 | 0.7487856713822810 | 0.0539739349286961 | T | T | T |
| 0.0609519222261511 | 0.2505752627366118 | 0.1370145013385282 | T | T | T |
| 0.3040216995719193 | 0.2465431167326372 | 0.1526845132857654 | T | T | T |



**Structure files (CONTCAR) involved in this work:**

|                    |                    |                    |   |   |   |
|--------------------|--------------------|--------------------|---|---|---|
| 0.2268937861125329 | 0.2518720968382769 | 0.5554480721200327 | T | T | T |
| 0.3899415706808452 | 0.2507819829693970 | 0.5513590820455899 | T | T | T |
| 0.5608529391890117 | 0.2516614014725890 | 0.3594880455722098 | T | T | T |
| 0.8016447470688942 | 0.2441886588413892 | 0.3491983441766349 | T | T | T |
| 0.7259341434386508 | 0.2493560272205087 | 0.9476965647418778 | T | T | T |
| 0.8904311391767975 | 0.2499625615025153 | 0.9524813206315162 | T | T | T |
| 0.9369909378568514 | 0.7485381553487568 | 0.8655835082967465 | T | T | T |
| 0.6863854713331562 | 0.7582130328180334 | 0.8586348510989270 | T | T | T |
| 0.7726286051101825 | 0.7504746699310219 | 0.4721566405434944 | T | T | T |
| 0.6058543923688667 | 0.7497222090192723 | 0.4554567698558585 | T | T | T |
| 0.9035425616949683 | 0.3978841211053618 | 0.6355336517851264 | T | T | T |
| 0.8955807313124753 | 0.3204781048276556 | 0.6495629318875458 | T | T | T |
| 0.9323391108564297 | 0.5955231522959610 | 0.4409423506061270 | T | T | T |
| 0.9224802736963106 | 0.6620640949253009 | 0.3511020600698402 | T | T | T |
| 0.9935918413886697 | 0.6060286439351924 | 0.3436901200471855 | T | T | T |
| 0.9442639675249583 | 0.4613936692089805 | 0.4773447803806845 | T | T | T |
| 0.9549315583180291 | 0.5096774270681035 | 0.5880485245607036 | T | T | T |
| 0.0129341184960709 | 0.4437560274599214 | 0.5589913469246470 | T | T | T |
| 0.8752177542517867 | 0.3805393206383008 | 0.4505301860617608 | T | T | T |
| 0.9408174451728135 | 0.6108778985223774 | 0.3633131908743936 | T | T | T |
| 0.9604030741106337 | 0.4591125501610482 | 0.5559589947040053 | T | T | T |

**Figure S13 TS**

Si Al O Ga H C

1.0000000000000000

20.0219999999999985 0.0000000000000000 0.0000000000000000

0.0000000000000000 19.8990000000000009 0.0000000000000000

0.0000000000000000 0.0000000000000000 13.3829999999999991

93 3 192 1 8 2

Selective dynamics

Direct

|                    |                    |                    |   |   |   |
|--------------------|--------------------|--------------------|---|---|---|
| 0.4218236018994213 | 0.0575330081207144 | 0.6481654205290116 | T | T | T |
| 0.3007835090914465 | 0.0271995112423191 | 0.7892066939364143 | T | T | T |
| 0.2794850511091339 | 0.0608261543005436 | 0.0126398099977233 | T | T | T |
| 0.1197190906614236 | 0.0642222821392508 | 0.0135583259822297 | T | T | T |
| 0.0667754967608522 | 0.0300640649669712 | 0.8005468111467674 | T | T | T |
| 0.1757542832050679 | 0.0564611815727112 | 0.6517011372976466 | T | T | T |
| 0.4189497620850369 | 0.8272691005552802 | 0.6703293593553619 | T | T | T |
| 0.3013233353670636 | 0.8688034350872260 | 0.8093125510956324 | T | T | T |
| 0.2668194961889917 | 0.8287749041048872 | 0.0296573626779174 | T | T | T |
| 0.1118182686148666 | 0.8269976570429450 | 0.0171764073913414 | T | T | T |
| 0.0612678075823009 | 0.8709556566493509 | 0.8029215522793632 | T | T | T |
| 0.1786122212101706 | 0.8283287029309677 | 0.6735123063386379 | T | T | T |
| 0.0745476063394247 | 0.9431503882967857 | 0.1508362712128637 | T | T | T |
| 0.1954580824006394 | 0.9733320235461214 | 0.2930977421186820 | T | T | T |
| 0.2161867785247931 | 0.9376213079321610 | 0.5148352721226286 | T | T | T |
| 0.3756502661146155 | 0.9343582219531377 | 0.5160191788395005 | T | T | T |
| 0.4293542900715800 | 0.9698518581910920 | 0.3051267719865109 | T | T | T |
| 0.3200987514466170 | 0.9451519990947801 | 0.1552411925968426 | T | T | T |
| 0.0779319677472461 | 0.1734234834273937 | 0.1656140528176208 | T | T | T |
| 0.1954290172342651 | 0.1307013714349961 | 0.3072792365602827 | T | T | T |
| 0.2305883801566050 | 0.1734397134908627 | 0.5249398502780661 | T | T | T |
| 0.3851781303263416 | 0.1742813369952133 | 0.5128067179629668 | T | T | T |
| 0.4363064168228051 | 0.1281926823235613 | 0.3026391101163550 | T | T | T |

**Structure files (CONTCAR) involved in this work:**

|                    |                    |                    |   |   |   |
|--------------------|--------------------|--------------------|---|---|---|
| 0.3186295813175943 | 0.1677086605338473 | 0.1715452256030535 | T | T | T |
| 0.5818056337981434 | 0.5556199780192448 | 0.3487062601918549 | T | T | T |
| 0.6955045866215983 | 0.5277352754585521 | 0.1885595207958835 | T | T | T |
| 0.7120106619483145 | 0.5659512742312559 | 0.9758990326158359 | T | T | T |
| 0.8708941271871592 | 0.5630458637052285 | 0.9808143066753318 | T | T | T |
| 0.9337987571326700 | 0.5302791490899823 | 0.1889126736600926 | T | T | T |
| 0.5769294680488111 | 0.3299660678113206 | 0.3357898514165936 | T | T | T |
| 0.7038528350986025 | 0.3732623439971279 | 0.2080723950515460 | T | T | T |
| 0.7311718694255724 | 0.3268614986623497 | 0.9922656473515771 | T | T | T |
| 0.8829266264612612 | 0.3279873032846073 | 0.9843578612416866 | T | T | T |
| 0.9352649762260477 | 0.3730856768301113 | 0.1990786100274079 | T | T | T |
| 0.9272836698011838 | 0.4405455117990850 | 0.8485283524015323 | T | T | T |
| 0.7804782015943130 | 0.4371163802008807 | 0.4815716238085151 | T | T | T |
| 0.6196127929219296 | 0.4340140164786136 | 0.4925920033089681 | T | T | T |
| 0.5668435498523350 | 0.4684131566266859 | 0.7080479953739864 | T | T | T |
| 0.6700445896116831 | 0.4350687439062700 | 0.8581078310131860 | T | T | T |
| 0.9178756020383230 | 0.6731210248997513 | 0.8295026796331838 | T | T | T |
| 0.7992430624134506 | 0.6343648185309037 | 0.6961731652178086 | T | T | T |
| 0.7668325730978399 | 0.6681496821870887 | 0.4780938615054685 | T | T | T |
| 0.6110846457385509 | 0.6710712115161807 | 0.4858602537098888 | T | T | T |
| 0.5629076467253114 | 0.6265950172921941 | 0.7035595489130387 | T | T | T |
| 0.6804795028375884 | 0.6822423459590153 | 0.8236603024424241 | T | T | T |
| 0.5739858649113235 | 0.9435758085992968 | 0.3655665999237669 | T | T | T |
| 0.6938769858742098 | 0.9732563709612316 | 0.2229533113526009 | T | T | T |
| 0.7174462857664736 | 0.9417808145461104 | 0.0007779449642789 | T | T | T |
| 0.8772557419000364 | 0.9342433959048415 | 0.9961423228320975 | T | T | T |
| 0.9297569899220262 | 0.9702521608609226 | 0.2068182627649460 | T | T | T |
| 0.8195842552497123 | 0.9430378874198727 | 0.3579639106085650 | T | T | T |
| 0.5803229815807878 | 0.1750069702159543 | 0.3367918040344622 | T | T | T |
| 0.6966456959035364 | 0.1297596654886734 | 0.1999515862177849 | T | T | T |
| 0.7305422149350898 | 0.1715139417358523 | 0.9790926108459049 | T | T | T |
| 0.8847338820622238 | 0.1735986788657630 | 0.9950077553373111 | T | T | T |
| 0.9336468623961743 | 0.1283304433999672 | 0.2057980286219618 | T | T | T |
| 0.8177265670698721 | 0.1675550159909076 | 0.3378774859577661 | T | T | T |
| 0.9228171038261878 | 0.0578339088096162 | 0.8632484206502842 | T | T | T |
| 0.8032942759943030 | 0.0293028427298461 | 0.7231542945716136 | T | T | T |
| 0.7798527448578998 | 0.0595847594547031 | 0.4987201921471970 | T | T | T |
| 0.6202828725917500 | 0.0677315440703402 | 0.4949640913032050 | T | T | T |
| 0.5668490077849004 | 0.0321634253085879 | 0.7033464442147683 | T | T | T |
| 0.6764397441471275 | 0.0560330395484096 | 0.8562091116543686 | T | T | T |
| 0.9173277294257004 | 0.8259981264828815 | 0.8406210671049777 | T | T | T |
| 0.8016162399477383 | 0.8736137052758920 | 0.7051199043295823 | T | T | T |
| 0.7670024075680423 | 0.8293851767535800 | 0.4868376521188579 | T | T | T |
| 0.6119142714336150 | 0.8260830659990323 | 0.4981939423510894 | T | T | T |
| 0.5617145561081207 | 0.8755669959402350 | 0.7044747883949758 | T | T | T |
| 0.6769854188270796 | 0.8381785315216854 | 0.8389642180588190 | T | T | T |
| 0.4224213784403676 | 0.4459195245521294 | 0.6397563410219359 | T | T | T |
| 0.3034570462705214 | 0.4739841056627537 | 0.7878677916821528 | T | T | T |
| 0.2857003756835356 | 0.4333537045487607 | 0.0067220890324909 | T | T | T |
| 0.1281440541421828 | 0.4319868857840429 | 0.0037471900273055 | T | T | T |
| 0.0756383248235089 | 0.4731520179869380 | 0.7976604017309017 | T | T | T |
| 0.1816547694503957 | 0.4501891828649791 | 0.6446809423365355 | T | T | T |
| 0.4228880957375306 | 0.6723935116999286 | 0.6630475133688303 | T | T | T |

**Structure files (CONTCAR) involved in this work:**

|                    |                     |                    |   |   |   |
|--------------------|---------------------|--------------------|---|---|---|
| 0.3007425954335619 | 0.6305172415656088  | 0.7987547057840146 | T | T | T |
| 0.2693946742586369 | 0.6728089439204190  | 0.0171035315323483 | T | T | T |
| 0.1152218260317293 | 0.6742451066560936  | 0.0072301236696030 | T | T | T |
| 0.0651268734139272 | 0.6302833903718326  | 0.7988091797390401 | T | T | T |
| 0.1787657863566855 | 0.6696937091883581  | 0.6628124775492507 | T | T | T |
| 0.0796870973249524 | 0.5540203245904168  | 0.1337990618010806 | T | T | T |
| 0.2003634727669253 | 0.5287592450582549  | 0.2800309823578196 | T | T | T |
| 0.2218172437180279 | 0.5684397471655317  | 0.5010976827936368 | T | T | T |
| 0.3828236916864151 | 0.5701528555230134  | 0.5029288192603066 | T | T | T |
| 0.4346285807223227 | 0.5287176682588649  | 0.2935851091065980 | T | T | T |
| 0.3274001507404813 | 0.5531341246090242  | 0.1415956458003517 | T | T | T |
| 0.0806036286412858 | 0.3285297639306035  | 0.1568210168111868 | T | T | T |
| 0.1967729040572170 | 0.3705229698786426  | 0.3022050540912110 | T | T | T |
| 0.2316005329882179 | 0.3303004323992931  | 0.5218600379682602 | T | T | T |
| 0.3860144535048449 | 0.3278527122961759  | 0.5094320953906767 | T | T | T |
| 0.4342569627019430 | 0.3711656114559570  | 0.2952488771201427 | T | T | T |
| 0.3181396292883329 | 0.3262886372281162  | 0.1659481243023430 | T | T | T |
| 0.8109286174171617 | 0.5598730198675201  | 0.3288078034088014 | T | T | T |
| 0.8258435508477466 | 0.3281936387019280  | 0.3429122868309513 | T | T | T |
| 0.7919134019105153 | 0.47444444651021076 | 0.7258280615308373 | T | T | T |
| 0.3563323245597141 | 0.0627551522812778  | 0.7190293284715717 | T | T | T |
| 0.2993004237931623 | 0.0660390405954033  | 0.8956469745233755 | T | T | T |
| 0.1993393071502758 | 0.0518892476891433  | 0.0276791163415041 | T | T | T |
| 0.1003258078834535 | 0.0671913196182279  | 0.8963221069565706 | T | T | T |
| 0.1010205509906185 | 0.0578564486651080  | 0.6986326336800014 | T | T | T |
| 0.2275102804590814 | 0.0330994705693505  | 0.7384233122410516 | T | T | T |
| 0.3568780514585045 | 0.8263913130558875  | 0.7482257024675657 | T | T | T |
| 0.3037095757219757 | 0.8440864232395245  | 0.9243757589715006 | T | T | T |
| 0.1890703737316899 | 0.8524543308384530  | 0.0210105750711578 | T | T | T |
| 0.0838282512239084 | 0.8323885777660048  | 0.9041799743492210 | T | T | T |
| 0.1012166211582087 | 0.8382995322369116  | 0.7084272385204128 | T | T | T |
| 0.2273390482199333 | 0.8550049843199375  | 0.7627299520659007 | T | T | T |
| 0.3192006272056873 | 0.9482782523794788  | 0.8034618967034729 | T | T | T |
| 0.0798479860973935 | 0.9498923355948383  | 0.8119540315426963 | T | T | T |
| 0.4297697075118939 | 0.1271252012133137  | 0.5855713770199129 | T | T | T |
| 0.4160482188395502 | 0.9951791823012003  | 0.5698926423527404 | T | T | T |
| 0.3962647121405032 | 0.8631593406742012  | 0.5665608203258965 | T | T | T |
| 0.1931421399132923 | 0.1314130589895891  | 0.6120418044608935 | T | T | T |
| 0.1779915058368870 | 0.0031554224069499  | 0.5596374136860395 | T | T | T |
| 0.1921322251904000 | 0.8692178403068821  | 0.5704909266978109 | T | T | T |
| 0.9876495387561518 | 0.0465563487497193  | 0.7924452152219714 | T | T | T |
| 0.9812587111631722 | 0.8619203729404198  | 0.7868419820473904 | T | T | T |
| 0.1402842719798797 | 0.9389167150879251  | 0.2210898047324302 | T | T | T |
| 0.1973488626084943 | 0.9315722346259552  | 0.3973303904531102 | T | T | T |
| 0.2961043181839385 | 0.9476680260421226  | 0.5304951401555825 | T | T | T |
| 0.3947778322231856 | 0.9306200493193356  | 0.3985644050175342 | T | T | T |
| 0.3949601839956422 | 0.9456684499710883  | 0.2012933568710194 | T | T | T |
| 0.2686265726817970 | 0.9703184531848922  | 0.2413870562419959 | T | T | T |
| 0.1411247648433290 | 0.1713227288714050  | 0.2412535569149115 | T | T | T |
| 0.1933927376597145 | 0.1622398523909268  | 0.4187009724195466 | T | T | T |
| 0.3078284478945278 | 0.1485166872854944  | 0.5160494176078145 | T | T | T |
| 0.4127845692207206 | 0.1713745012912846  | 0.3993094059388677 | T | T | T |
| 0.3959502470311196 | 0.1555864534499339  | 0.2048855738244253 | T | T | T |

**Structure files (CONTCAR) involved in this work:**

|                    |                    |                    |   |   |   |
|--------------------|--------------------|--------------------|---|---|---|
| 0.2698225836189721 | 0.1393630777113475 | 0.2597168838974129 | T | T | T |
| 0.1757896064699549 | 0.0515378240973599 | 0.3122853107449662 | T | T | T |
| 0.4179908367265321 | 0.0498854820513498 | 0.3218326448396418 | T | T | T |
| 0.0665433278692789 | 0.8719715675799422 | 0.0920684324188981 | T | T | T |
| 0.0802025620959068 | 0.0031736425774883 | 0.0685674809598791 | T | T | T |
| 0.0976032034972013 | 0.1354594032415461 | 0.0622227482088646 | T | T | T |
| 0.3026460128299716 | 0.8692165164581338 | 0.1198356555563047 | T | T | T |
| 0.3166228489737476 | 0.9953673138604801 | 0.0595406712566235 | T | T | T |
| 0.3040072224879143 | 0.1293002099585091 | 0.0669523662707007 | T | T | T |
| 0.5081446714898018 | 0.9524560384434642 | 0.2961847428115913 | T | T | T |
| 0.5161821455863790 | 0.1372551952409087 | 0.2859004964475042 | T | T | T |
| 0.6459327983278098 | 0.5560552767564270 | 0.2758428180526902 | T | T | T |
| 0.6791299226130204 | 0.5698366750912575 | 0.0864198194507444 | T | T | T |
| 0.7918288614387924 | 0.5487464196785697 | 0.9845617307880584 | T | T | T |
| 0.9032834418630481 | 0.5674682334562807 | 0.0923998132724423 | T | T | T |
| 0.9019364962090883 | 0.5670292634687134 | 0.2931396095835226 | T | T | T |
| 0.7721438387743595 | 0.5406093578572121 | 0.2188919385459208 | T | T | T |
| 0.6420972477784532 | 0.3377010802489664 | 0.2670089776919568 | T | T | T |
| 0.7181101073248769 | 0.3255668434412171 | 0.1110884406040913 | T | T | T |
| 0.8067903432670868 | 0.3552539505401155 | 0.9682520224974294 | T | T | T |
| 0.9063930883899648 | 0.3372152540520189 | 0.0985700935458105 | T | T | T |
| 0.9071174818337842 | 0.3392746649450936 | 0.2983048916253869 | T | T | T |
| 0.7692612335728805 | 0.3769726821345760 | 0.2762543484959642 | T | T | T |
| 0.6804452021357261 | 0.4479146514169914 | 0.1702346778128012 | T | T | T |
| 0.9133819178202898 | 0.4527786098493052 | 0.1928747298619883 | T | T | T |
| 0.5717937330207341 | 0.6290670617076572 | 0.3998521641983182 | T | T | T |
| 0.5917072883302527 | 0.5014363173097408 | 0.4387467497237981 | T | T | T |
| 0.5862501940435032 | 0.3680410946995971 | 0.4425689183816619 | T | T | T |
| 0.7980209112914645 | 0.6385263748977267 | 0.3774678128814494 | T | T | T |
| 0.8091532656040995 | 0.4975815641028347 | 0.4172439834437128 | T | T | T |
| 0.8205976185718792 | 0.3663120365894526 | 0.4641758799277135 | T | T | T |
| 0.0131824811339560 | 0.5425717204334241 | 0.2016991827317803 | T | T | T |
| 0.0169262377079286 | 0.3714895965592319 | 0.1958166868458714 | T | T | T |
| 0.8728178395910567 | 0.4342008553072259 | 0.7550828795351503 | T | T | T |
| 0.8069398456151902 | 0.4516349843390751 | 0.5989874309097419 | T | T | T |
| 0.7003357494240683 | 0.4305482749141633 | 0.4827682482316031 | T | T | T |
| 0.5994689310051029 | 0.4345973853500515 | 0.6092960706671100 | T | T | T |
| 0.5963337554665088 | 0.4314964608784627 | 0.8065447913030039 | T | T | T |
| 0.7278721853690004 | 0.4299546692898888 | 0.7747227997482444 | T | T | T |
| 0.8630643989473724 | 0.6755350935852232 | 0.7410268915969804 | T | T | T |
| 0.8062223491510646 | 0.6369089220663007 | 0.5751090597314470 | T | T | T |
| 0.6884124729036432 | 0.6470843616036308 | 0.4902622097208803 | T | T | T |
| 0.5773087105368462 | 0.6578650674971007 | 0.5940091157303771 | T | T | T |
| 0.6038934119145606 | 0.6669722532590667 | 0.7895155310763474 | T | T | T |
| 0.7295397856347282 | 0.6714556071296803 | 0.7276777222504285 | T | T | T |
| 0.7998459975555090 | 0.5590688667615832 | 0.7405458036694360 | T | T | T |
| 0.5849972214513469 | 0.5481874304525698 | 0.7081516076779527 | T | T | T |
| 0.9317057773440724 | 0.3705344803171831 | 0.9090282289855410 | T | T | T |
| 0.9068714489039648 | 0.5010339543343501 | 0.9218371721931453 | T | T | T |
| 0.8889714557938586 | 0.6330087465742098 | 0.9260312753893006 | T | T | T |
| 0.6762641706201858 | 0.3734176071516284 | 0.9370433791331040 | T | T | T |
| 0.6748832651569511 | 0.5070644955287903 | 0.9146576300830790 | T | T | T |
| 0.7027171972512878 | 0.6368678731014091 | 0.9184535757574590 | T | T | T |

**Structure files (CONTCAR) involved in this work:**

|                    |                    |                    |   |   |   |
|--------------------|--------------------|--------------------|---|---|---|
| 0.4864743837028490 | 0.4587163616229630 | 0.7103001374790266 | T | T | T |
| 0.4828651362317308 | 0.6349749738967180 | 0.7240482902125889 | T | T | T |
| 0.6391516898721611 | 0.9372278731298312 | 0.2943281929933315 | T | T | T |
| 0.6961502485811287 | 0.9341015487836734 | 0.1167612440529594 | T | T | T |
| 0.7978898365057848 | 0.9495869455782725 | 0.9878185371670610 | T | T | T |
| 0.8996144743853881 | 0.9287722365776245 | 0.1122246744375354 | T | T | T |
| 0.8940698303990378 | 0.9458118042077588 | 0.3095793099317751 | T | T | T |
| 0.7673699571850967 | 0.9685383554076312 | 0.2732464503147563 | T | T | T |
| 0.6422449128929467 | 0.1748546989871029 | 0.2592509869641784 | T | T | T |
| 0.6953645209505317 | 0.1547722722626358 | 0.0849477257645492 | T | T | T |
| 0.8082476533422688 | 0.1468050473013544 | 0.9849151962313988 | T | T | T |
| 0.9083695768287215 | 0.1727633541034421 | 0.1108014787503876 | T | T | T |
| 0.8956967163144285 | 0.1528158383656931 | 0.3061555816048497 | T | T | T |
| 0.7707014621065709 | 0.1370910035927977 | 0.2479303097329368 | T | T | T |
| 0.6734400654204558 | 0.0513769730440387 | 0.2064247858738980 | T | T | T |
| 0.9174532188831561 | 0.0495242439842253 | 0.1847730548913304 | T | T | T |
| 0.5654680198919605 | 0.8750209372475194 | 0.4304400831828715 | T | T | T |
| 0.5789488459877135 | 0.0071574747728199 | 0.4416743727296246 | T | T | T |
| 0.6021285484804390 | 0.1381447860586410 | 0.4402921013083073 | T | T | T |
| 0.8033757350340565 | 0.8663438676827451 | 0.3927826775027058 | T | T | T |
| 0.8159859556073294 | 0.9925298749066683 | 0.4544953131788764 | T | T | T |
| 0.8038295926665477 | 0.1266579280022992 | 0.4415795558256918 | T | T | T |
| 0.0091421758734804 | 0.9549261881653150 | 0.2199241293008726 | T | T | T |
| 0.0140463152806993 | 0.1382232897559730 | 0.2193635667754691 | T | T | T |
| 0.8571657829788569 | 0.0676822400464762 | 0.7935554831805749 | T | T | T |
| 0.8011671912828843 | 0.0662774144251192 | 0.6154259775978643 | T | T | T |
| 0.6993565826617375 | 0.0506726282898339 | 0.4869674980360713 | T | T | T |
| 0.5982773622478456 | 0.0752672052841730 | 0.6113521296672445 | T | T | T |
| 0.6020513448644023 | 0.0523169308984116 | 0.8084024966265663 | T | T | T |
| 0.7291238728983177 | 0.0315197228857965 | 0.7714839357709180 | T | T | T |
| 0.8540583626924326 | 0.8266518801715166 | 0.7652917892391146 | T | T | T |
| 0.8036245773218861 | 0.8526514545089946 | 0.5889547522722584 | T | T | T |
| 0.6888563765583234 | 0.8520334655218844 | 0.4910484029567053 | T | T | T |
| 0.5869443117150391 | 0.8275673329831803 | 0.6137547933359293 | T | T | T |
| 0.6001863782101770 | 0.8541321512271078 | 0.8065435098242871 | T | T | T |
| 0.7266377879805423 | 0.8642929521480078 | 0.7502019674231003 | T | T | T |
| 0.8261097070561388 | 0.9511615843776748 | 0.7150831700685161 | T | T | T |
| 0.5786806773220263 | 0.9531829824889291 | 0.6772705803776872 | T | T | T |
| 0.9334913376938233 | 0.1260293408921820 | 0.9284510483279225 | T | T | T |
| 0.9168331761284501 | 0.9944658276464572 | 0.9394418063814449 | T | T | T |
| 0.8971864397020025 | 0.8631376987618329 | 0.9443976508769347 | T | T | T |
| 0.6920985827206103 | 0.1326649868412623 | 0.8894075505010458 | T | T | T |
| 0.6811206049005782 | 0.0078132546939970 | 0.9541176022829783 | T | T | T |
| 0.6931412087874103 | 0.8745720586927482 | 0.9439977878596278 | T | T | T |
| 0.4876625848668006 | 0.0477143459725037 | 0.7169943774203521 | T | T | T |
| 0.4816325740294679 | 0.8667130491785759 | 0.7210352853843190 | T | T | T |
| 0.3567419075397331 | 0.4429675275181258 | 0.7102234619952699 | T | T | T |
| 0.3035130457022919 | 0.4285639520304270 | 0.8886510655891721 | T | T | T |
| 0.2063548476099983 | 0.4488817242515907 | 0.0221958128747385 | T | T | T |
| 0.1113760603911280 | 0.4294197724323125 | 0.8849217942896227 | T | T | T |
| 0.1055780581401053 | 0.4545457014444605 | 0.6881696051167937 | T | T | T |
| 0.2300620036560744 | 0.4715243851161903 | 0.7363032889598307 | T | T | T |
| 0.3547295524970291 | 0.6666969962978458 | 0.7276058116740429 | T | T | T |

**Structure files (CONTCAR) involved in this work:**

|                    |                    |                    |   |   |   |
|--------------------|--------------------|--------------------|---|---|---|
| 0.3008629101689302 | 0.6688251171892897 | 0.9055128182954265 | T | T | T |
| 0.1919159364889615 | 0.6473043166125259 | 0.0134811884353676 | T | T | T |
| 0.0909846981670249 | 0.6759893442227506 | 0.8914891579662361 | T | T | T |
| 0.1014894220083687 | 0.6553770659946038 | 0.6964189428074832 | T | T | T |
| 0.2271482999912320 | 0.6361323324380784 | 0.7472437466375444 | T | T | T |
| 0.3200617089023114 | 0.5518448125358629 | 0.8152830736724117 | T | T | T |
| 0.0845730009360942 | 0.5523638313739384 | 0.8222444528330607 | T | T | T |
| 0.4312647620934753 | 0.3749494968076302 | 0.5814583523504041 | T | T | T |
| 0.4160106093738034 | 0.5052496469726413 | 0.5570052861603378 | T | T | T |
| 0.4111764072112165 | 0.6383473255253396 | 0.5539067856577428 | T | T | T |
| 0.1943170777484836 | 0.3737000527061203 | 0.6082223497893123 | T | T | T |
| 0.1895203744211624 | 0.5008741222015836 | 0.5503287661165364 | T | T | T |
| 0.1914987919884149 | 0.6352201428476789 | 0.5543062090915885 | T | T | T |
| 0.9967317503759692 | 0.4541391992950733 | 0.7904337601251632 | T | T | T |
| 0.9847841847126285 | 0.6361879060342022 | 0.7859354891696494 | T | T | T |
| 0.1434262077731591 | 0.5606122322388636 | 0.2074379388349542 | T | T | T |
| 0.2008714001862952 | 0.5710745257794054 | 0.3839336955940898 | T | T | T |
| 0.3021213241294819 | 0.5661076909694369 | 0.5155867600940144 | T | T | T |
| 0.4033558850681518 | 0.5713869342298132 | 0.3861798156433429 | T | T | T |
| 0.4013282552189373 | 0.5565803968163587 | 0.1907541042568488 | T | T | T |
| 0.2729363942250601 | 0.5343578245614189 | 0.2276332756731530 | T | T | T |
| 0.1391567736182669 | 0.3320233439779203 | 0.2402200357839087 | T | T | T |
| 0.1944071200647382 | 0.3420451720559617 | 0.4155060781092057 | T | T | T |
| 0.3089078949671895 | 0.3547152656950457 | 0.5127708045935778 | T | T | T |
| 0.4123180532139747 | 0.3303464707360631 | 0.3952059114777842 | T | T | T |
| 0.3948440241870542 | 0.3402069558534250 | 0.1993450212560894 | T | T | T |
| 0.2695299039485103 | 0.3570175484562660 | 0.2524835376906443 | T | T | T |
| 0.1818654468979763 | 0.4508533920701010 | 0.3026820605377391 | T | T | T |
| 0.4151529811494020 | 0.4499845212417437 | 0.3095107549600732 | T | T | T |
| 0.0687866475847631 | 0.6233570175919395 | 0.0720280137186927 | T | T | T |
| 0.0848980806719351 | 0.4917812981731011 | 0.0558279024255746 | T | T | T |
| 0.1078767179011333 | 0.3600283317198225 | 0.0516756869547319 | T | T | T |
| 0.3109953150516372 | 0.6259396868345605 | 0.0934805692893771 | T | T | T |
| 0.3272213529004623 | 0.4950331433875831 | 0.0561036537395312 | T | T | T |
| 0.3039115598051986 | 0.3620993441113957 | 0.0587500412078498 | T | T | T |
| 0.5147890655422126 | 0.5378159430416624 | 0.2853840505441692 | T | T | T |
| 0.5135908107718816 | 0.3622651726306540 | 0.2757696423773109 | T | T | T |
| 0.4405403117968188 | 0.7507735354673563 | 0.6448116762890320 | T | T | T |
| 0.1929232121512428 | 0.7493713673911002 | 0.6519968477126493 | T | T | T |
| 0.2725168936677563 | 0.7495483017217791 | 0.0567963843477329 | T | T | T |
| 0.1078607007597558 | 0.7490744221966844 | 0.0535154485727917 | T | T | T |
| 0.0605684232789011 | 0.2508422194579949 | 0.1374661945831568 | T | T | T |
| 0.3043006360313379 | 0.2468077092924961 | 0.1528552217880656 | T | T | T |
| 0.2267270328693140 | 0.2522824495877034 | 0.5550170169253014 | T | T | T |
| 0.3899866932050470 | 0.2514705865328147 | 0.5512554989687369 | T | T | T |
| 0.5609683201115916 | 0.2520419507844280 | 0.3620993903616535 | T | T | T |
| 0.8039217150406841 | 0.2451908454884945 | 0.3556762628065593 | T | T | T |
| 0.7260156506913956 | 0.2504382811264831 | 0.9509840772985889 | T | T | T |
| 0.8898952866379367 | 0.2498385021815425 | 0.9522445157165522 | T | T | T |
| 0.9363821999256239 | 0.7485082231665133 | 0.8662710613622542 | T | T | T |
| 0.6866686817476380 | 0.7591589809667028 | 0.8600872832145600 | T | T | T |
| 0.7740216201416877 | 0.7493272383284096 | 0.4756488785219511 | T | T | T |
| 0.6051685446061611 | 0.7499707783042949 | 0.4568732496113864 | T | T | T |

**Structure files (CONTCAR) involved in this work:**

|                    |                    |                    |   |   |   |
|--------------------|--------------------|--------------------|---|---|---|
| 0.8957259303521898 | 0.4158397923062843 | 0.6150349742156815 | T | T | T |
| 0.8702629077429244 | 0.3235188419826191 | 0.6188440284741411 | T | T | T |
| 0.9248751618251573 | 0.6019519611539442 | 0.4357791549784676 | T | T | T |
| 0.9319892383664901 | 0.6634061191469507 | 0.3382526698602862 | T | T | T |
| 0.9944613768023645 | 0.5982049594279724 | 0.3504069251390087 | T | T | T |
| 0.9624780231209720 | 0.4345716516422400 | 0.4602668415993139 | T | T | T |
| 0.9813617323530176 | 0.4962254236904573 | 0.5558745077116750 | T | T | T |
| 0.0183689432127272 | 0.4144176751603512 | 0.5627396800022950 | T | T | T |
| 0.8506719327368643 | 0.3323451764223325 | 0.5647647245460082 | T | T | T |
| 0.9416676362118175 | 0.6110413368664033 | 0.3589944953350332 | T | T | T |
| 0.9741928937157092 | 0.4426423792710883 | 0.5393933629506200 | T | T | T |

**Figure S13 FS**

Si Al O Ga H C

1.0000000000000000

20.0219999999999985 0.0000000000000000 0.0000000000000000

0.0000000000000000 19.8990000000000009 0.0000000000000000

0.0000000000000000 0.0000000000000000 13.3829999999999991

93 3 192 1 8 2

Selective dynamics

Direct

|                    |                    |                    |   |   |   |
|--------------------|--------------------|--------------------|---|---|---|
| 0.4218959965403347 | 0.0571604374946573 | 0.6480697267189638 | T | T | T |
| 0.3008711778155922 | 0.0268519207488102 | 0.7893279711360456 | T | T | T |
| 0.2794161262587918 | 0.0605598275263052 | 0.0125403472715371 | T | T | T |
| 0.1196908352032151 | 0.0640444046256397 | 0.0133482079899811 | T | T | T |
| 0.0669248311017852 | 0.0298516872082353 | 0.8004088122880630 | T | T | T |
| 0.1759725438860996 | 0.0559688118842651 | 0.6515773589940622 | T | T | T |
| 0.4193714268548998 | 0.8270422512285709 | 0.6705281480346464 | T | T | T |
| 0.3014699142839162 | 0.8684333452845905 | 0.8093896148719727 | T | T | T |
| 0.2669324562468228 | 0.8284576156717155 | 0.0297340154176974 | T | T | T |
| 0.1119736323657162 | 0.8267101306262868 | 0.0170569489673650 | T | T | T |
| 0.0615414623808983 | 0.8707557860165913 | 0.8028509953985739 | T | T | T |
| 0.1787853433523478 | 0.8279179872035000 | 0.6733567969738177 | T | T | T |
| 0.0747561782097112 | 0.9430076747606650 | 0.1506006860573870 | T | T | T |
| 0.1956361484139250 | 0.9731457828403665 | 0.2930647430481476 | T | T | T |
| 0.2165383022196578 | 0.9370670695770692 | 0.5145772130344068 | T | T | T |
| 0.3760869863856292 | 0.9338933388685839 | 0.5157547194854638 | T | T | T |
| 0.4295853504608779 | 0.9694502777084146 | 0.3047835491269489 | T | T | T |
| 0.3202070623895577 | 0.9449580604681872 | 0.1551972555507554 | T | T | T |
| 0.0779540714775661 | 0.1733241986245031 | 0.1655171918716689 | T | T | T |
| 0.1953579984596402 | 0.1305289993288371 | 0.3073757826884869 | T | T | T |
| 0.2306411875545721 | 0.1731393017064970 | 0.5248820907873903 | T | T | T |
| 0.3852282558465986 | 0.1738925396044073 | 0.5126778357400900 | T | T | T |
| 0.4359080929656122 | 0.1277183707997274 | 0.3022662885846079 | T | T | T |
| 0.3183138736940822 | 0.1675453277065221 | 0.1713602540426921 | T | T | T |
| 0.5821879356697351 | 0.5550372572350746 | 0.3506520105816392 | T | T | T |
| 0.6962160263612425 | 0.5280046385086340 | 0.1905867758547399 | T | T | T |
| 0.7109792852612521 | 0.5659851934390585 | 0.9780534865693801 | T | T | T |
| 0.8698764911205832 | 0.5607600352881879 | 0.9762961962602715 | T | T | T |
| 0.9334434022798314 | 0.5293976646481933 | 0.1873658892657112 | T | T | T |
| 0.5755364818853217 | 0.3295200880631587 | 0.3359293341970506 | T | T | T |
| 0.7060929038763157 | 0.3730670229760179 | 0.2156405283251977 | T | T | T |
| 0.7310693995626060 | 0.3273874630286978 | 0.9975709350954072 | T | T | T |
| 0.8823944298384763 | 0.3283977012522108 | 0.9839412989365542 | T | T | T |

**Structure files (CONTCAR) involved in this work:**

|                    |                    |                    |   |   |   |
|--------------------|--------------------|--------------------|---|---|---|
| 0.9352374869096814 | 0.3727954188879315 | 0.1993276136977715 | T | T | T |
| 0.9251423954868289 | 0.4380847638524820 | 0.8394570276955423 | T | T | T |
| 0.7763152990133746 | 0.4391102244789988 | 0.4806458369993097 | T | T | T |
| 0.6178794165845480 | 0.4318231245994649 | 0.4927243034096694 | T | T | T |
| 0.5679254158023798 | 0.4672675810574018 | 0.7089832497314743 | T | T | T |
| 0.6701858950380085 | 0.4351022807101360 | 0.8628555859780057 | T | T | T |
| 0.9178182913198031 | 0.6730007866313243 | 0.8299333056529090 | T | T | T |
| 0.8001033896399604 | 0.6334222286425296 | 0.6974985179083064 | T | T | T |
| 0.7671157697456999 | 0.6681405106851830 | 0.4794391803032554 | T | T | T |
| 0.6115920307362569 | 0.6707300111205886 | 0.4868441487075995 | T | T | T |
| 0.5632091154691171 | 0.6258206283905375 | 0.7041852410614270 | T | T | T |
| 0.6806261070690198 | 0.6813467203955098 | 0.8247032249552692 | T | T | T |
| 0.5742970915880473 | 0.9432342369807353 | 0.3649670821553640 | T | T | T |
| 0.6943994181212532 | 0.9732415646084246 | 0.2226256777471295 | T | T | T |
| 0.7175234776390412 | 0.9419230464155097 | 1.0000185860095183 | T | T | T |
| 0.8774366988304783 | 0.9344674671314761 | 0.9961966761923874 | T | T | T |
| 0.9301227208655802 | 0.9702010729578798 | 0.2071538155773141 | T | T | T |
| 0.8198333462771360 | 0.9422346920702555 | 0.3570915583281569 | T | T | T |
| 0.5795578575680213 | 0.1746034516355599 | 0.3359173794480526 | T | T | T |
| 0.6969986651113271 | 0.1307771855689889 | 0.2009442899091371 | T | T | T |
| 0.7302837857471338 | 0.1715949686168864 | 0.9796696637748947 | T | T | T |
| 0.8847703220705045 | 0.1738079400054704 | 0.9946402107560735 | T | T | T |
| 0.9335874522026522 | 0.1285902657529833 | 0.2060456239779582 | T | T | T |
| 0.8185177678063524 | 0.1696147914629006 | 0.3404972910566112 | T | T | T |
| 0.9228874887135790 | 0.0579262165599807 | 0.8628419619402158 | T | T | T |
| 0.8035347503485193 | 0.0291074950927296 | 0.7225318944516869 | T | T | T |
| 0.7798693923018897 | 0.0591303469480623 | 0.4980516381241606 | T | T | T |
| 0.6201823005765710 | 0.0675191474666349 | 0.4943700068501556 | T | T | T |
| 0.5669889806031762 | 0.0320549517410425 | 0.7029307108938012 | T | T | T |
| 0.6767609612266758 | 0.0564641752679117 | 0.8552906565919568 | T | T | T |
| 0.9175081546972478 | 0.8258097762263064 | 0.8407908663726168 | T | T | T |
| 0.8021723103394204 | 0.8733645548589939 | 0.7045832337870161 | T | T | T |
| 0.7670564996551189 | 0.8294549580884172 | 0.4869215081696834 | T | T | T |
| 0.6121552124433737 | 0.8258860004488715 | 0.4978568692224556 | T | T | T |
| 0.5620559162572132 | 0.8754037929190429 | 0.7043364360025332 | T | T | T |
| 0.6776497555068900 | 0.8377256971948427 | 0.8381952214525463 | T | T | T |
| 0.4229698429698784 | 0.4453168858356989 | 0.6406979890067154 | T | T | T |
| 0.3037940184681748 | 0.4739985327200484 | 0.7884262482607874 | T | T | T |
| 0.2856006617757767 | 0.4336953077541153 | 0.0072020511276910 | T | T | T |
| 0.1283603181993982 | 0.4320852160692652 | 0.0037917799709180 | T | T | T |
| 0.0751210476664104 | 0.4722050422069895 | 0.7974665226510064 | T | T | T |
| 0.1820637649010428 | 0.4498300354131207 | 0.6451448163986815 | T | T | T |
| 0.4231000720445000 | 0.6721630485653873 | 0.6638973945843765 | T | T | T |
| 0.3009135082097832 | 0.6304693345058581 | 0.7994553166281595 | T | T | T |
| 0.2694819892827932 | 0.6725105163718729 | 0.0181319886580826 | T | T | T |
| 0.1153705203588932 | 0.6737762845475177 | 0.0079205013921635 | T | T | T |
| 0.0651191557672920 | 0.6295654443769954 | 0.7992872498217203 | T | T | T |
| 0.1787648441324739 | 0.6691705225182294 | 0.6631955729394802 | T | T | T |
| 0.0794941929977074 | 0.5536137903909354 | 0.1341402128916182 | T | T | T |
| 0.2003618149755210 | 0.5285050677859509 | 0.2803334283504630 | T | T | T |
| 0.2219356630326239 | 0.5678298085183455 | 0.5015285703399029 | T | T | T |
| 0.3829523639690143 | 0.5696395680491463 | 0.5041148425801709 | T | T | T |
| 0.4349261085096665 | 0.5282040072394323 | 0.2947417092604808 | T | T | T |



**Structure files (CONTCAR) involved in this work:**

|                    |                    |                    |   |   |   |
|--------------------|--------------------|--------------------|---|---|---|
| 0.3278064902027000 | 0.5529668759835407 | 0.1423277192294876 | T | T | T |
| 0.0808155197039024 | 0.3284374791807891 | 0.1567139160891629 | T | T | T |
| 0.1962273657430542 | 0.3702165702425710 | 0.3032347449003415 | T | T | T |
| 0.2318091185879536 | 0.3299880266979595 | 0.5223328538382752 | T | T | T |
| 0.3862269582622906 | 0.3274411205248290 | 0.5092914250177647 | T | T | T |
| 0.4340725479439880 | 0.3706943738521122 | 0.2948464836380972 | T | T | T |
| 0.3172829334352034 | 0.3260157011563190 | 0.1662362959581243 | T | T | T |
| 0.8107365458290263 | 0.5619898458989664 | 0.3276587663033792 | T | T | T |
| 0.8298817006237329 | 0.3294942581598901 | 0.3528966853515909 | T | T | T |
| 0.7931388592375459 | 0.4737597575095220 | 0.7281678988845871 | T | T | T |
| 0.3564675240916012 | 0.0622323548992808 | 0.7190522776216223 | T | T | T |
| 0.2993548232260076 | 0.0658943032465807 | 0.8956036984100711 | T | T | T |
| 0.1992796482487013 | 0.0515007549577757 | 0.0274788011446782 | T | T | T |
| 0.1003596393426197 | 0.0671932291894682 | 0.8961050513913947 | T | T | T |
| 0.1012016351584825 | 0.0574156847999869 | 0.6983786138361872 | T | T | T |
| 0.2276316849597692 | 0.0326777590589822 | 0.7384636219007066 | T | T | T |
| 0.3571713327314246 | 0.8263227796449656 | 0.7481658623693817 | T | T | T |
| 0.3038612717351650 | 0.8434286255561917 | 0.9243541160723081 | T | T | T |
| 0.1892136224624575 | 0.8521848840697426 | 0.0208980556121137 | T | T | T |
| 0.0842256231657579 | 0.8320200513077559 | 0.9039201956488153 | T | T | T |
| 0.1014109682606434 | 0.8382902046750863 | 0.7081397466056303 | T | T | T |
| 0.2275758529904007 | 0.8545675923607112 | 0.7625422040367432 | T | T | T |
| 0.3191901103544069 | 0.9479580529029082 | 0.8040438204589663 | T | T | T |
| 0.0800896698173485 | 0.9497002442829676 | 0.8121483880784718 | T | T | T |
| 0.4297594373492042 | 0.1268067939966703 | 0.5856048014718248 | T | T | T |
| 0.4161618571971741 | 0.9949424578691660 | 0.5695672006149896 | T | T | T |
| 0.3968964472596411 | 0.8628377997421890 | 0.5665654012028332 | T | T | T |
| 0.1933611740085429 | 0.1309288814073927 | 0.6119286069995498 | T | T | T |
| 0.1784307486322117 | 0.0025963893569094 | 0.5596076659263666 | T | T | T |
| 0.1925702988661265 | 0.8686366516186407 | 0.5702469269698603 | T | T | T |
| 0.9877902771002746 | 0.0462996398225438 | 0.7922879458015644 | T | T | T |
| 0.9815335321017588 | 0.8616197648477718 | 0.7870686405574089 | T | T | T |
| 0.1405929628144939 | 0.9388786782249136 | 0.2206661019376785 | T | T | T |
| 0.1974062985839281 | 0.9311891967689933 | 0.3971355968953936 | T | T | T |
| 0.2964925171237860 | 0.9470263164280254 | 0.5298657817260068 | T | T | T |
| 0.3954156957573810 | 0.9300404952719097 | 0.3983755283402858 | T | T | T |
| 0.3951414827677515 | 0.9452279984924176 | 0.2010108499211936 | T | T | T |
| 0.2688845051759595 | 0.9702096308519168 | 0.2415293600105459 | T | T | T |
| 0.1411129746465430 | 0.1711247447267909 | 0.2412031286880027 | T | T | T |
| 0.1932594745586766 | 0.1621765954046852 | 0.4187277910859978 | T | T | T |
| 0.3078626098078033 | 0.1481910961284844 | 0.5156676165730451 | T | T | T |
| 0.4128449399952693 | 0.1708923780725635 | 0.3991775680390311 | T | T | T |
| 0.3956091983257963 | 0.1554159897391446 | 0.2046932182790410 | T | T | T |
| 0.2697283665669417 | 0.1392859996744326 | 0.2598188622022678 | T | T | T |
| 0.1759146190418248 | 0.0513209330228047 | 0.3125122176712450 | T | T | T |
| 0.4176728224198570 | 0.0494187701603078 | 0.3215106291719232 | T | T | T |
| 0.0667126362441395 | 0.8717951655358588 | 0.0918890335586080 | T | T | T |
| 0.0801345905175788 | 0.0029543453475805 | 0.0681691327002398 | T | T | T |
| 0.0975905673951273 | 0.1352325221707729 | 0.0622219971583345 | T | T | T |
| 0.3026783954947507 | 0.8690645037598128 | 0.1197993677725638 | T | T | T |
| 0.3166760163897110 | 0.9952031999579356 | 0.0595273001254324 | T | T | T |
| 0.3037006467618276 | 0.1290828760899809 | 0.0668684598857812 | T | T | T |
| 0.5084683561630777 | 0.9524296783402069 | 0.2955801483245351 | T | T | T |

**Structure files (CONTCAR) involved in this work:**

|                    |                    |                    |   |   |   |
|--------------------|--------------------|--------------------|---|---|---|
| 0.5157207784087933 | 0.1365769720032115 | 0.2849358144471740 | T | T | T |
| 0.6467818551669645 | 0.5556170269463004 | 0.2785728361370363 | T | T | T |
| 0.6781645636813627 | 0.5694784900906272 | 0.0887467464505388 | T | T | T |
| 0.7906445584308454 | 0.5482300011439531 | 0.9855956792559226 | T | T | T |
| 0.9047058791320426 | 0.5628010498207381 | 0.0867975940674911 | T | T | T |
| 0.9014461660710097 | 0.5679881324485826 | 0.2906669936139476 | T | T | T |
| 0.7730993324997840 | 0.5428943420214006 | 0.2172039777668489 | T | T | T |
| 0.6425173487622683 | 0.3381009840209621 | 0.2711428192051325 | T | T | T |
| 0.7224104924208102 | 0.3264343887156014 | 0.1179079740928006 | T | T | T |
| 0.8060523592951392 | 0.3551289691464116 | 0.9692173217092810 | T | T | T |
| 0.9056278514479531 | 0.3377088458114074 | 0.0987012986264623 | T | T | T |
| 0.9088109421406441 | 0.3391957437117866 | 0.3001669843673155 | T | T | T |
| 0.7693159135435652 | 0.3762633744373062 | 0.2897924380820493 | T | T | T |
| 0.6835522680075468 | 0.4474812323149465 | 0.1758369277148985 | T | T | T |
| 0.9124194991283026 | 0.4521920667934600 | 0.1959625119868457 | T | T | T |
| 0.5718212458382119 | 0.6285025164270062 | 0.4014623142257178 | T | T | T |
| 0.5926761220667177 | 0.5010080235813567 | 0.4410193562898678 | T | T | T |
| 0.5807543416435141 | 0.3677447170136603 | 0.4434602470629839 | T | T | T |
| 0.7990184677561186 | 0.6400769651723088 | 0.3782015058342465 | T | T | T |
| 0.8035986453523118 | 0.4993863827951515 | 0.4150855090308491 | T | T | T |
| 0.8292061449744353 | 0.3733014431322578 | 0.4750891930358100 | T | T | T |
| 0.0127232224559577 | 0.5418583478689983 | 0.2014795362958980 | T | T | T |
| 0.0167548615895632 | 0.3716060141478426 | 0.1938975800095273 | T | T | T |
| 0.8732369815699736 | 0.4292209177310002 | 0.7426462321978724 | T | T | T |
| 0.7985633606719261 | 0.4578355007225293 | 0.5978884264807505 | T | T | T |
| 0.6981186699691375 | 0.4225305842364580 | 0.4768350021461616 | T | T | T |
| 0.6013971367920038 | 0.4332791711340083 | 0.6105899243510569 | T | T | T |
| 0.5976417679681172 | 0.4304657508874284 | 0.8074590210888606 | T | T | T |
| 0.7302276766678519 | 0.4305162554315795 | 0.7831367080217937 | T | T | T |
| 0.8632421126471715 | 0.6763388379876344 | 0.7410888127905386 | T | T | T |
| 0.8064099908806122 | 0.6364059584958626 | 0.5761564398436548 | T | T | T |
| 0.6888250182530504 | 0.6462201479481963 | 0.4907000948531753 | T | T | T |
| 0.5779999480881873 | 0.6579486999832088 | 0.5952227478846456 | T | T | T |
| 0.6040287686541687 | 0.6657169628047996 | 0.7908034508707873 | T | T | T |
| 0.7296465043750308 | 0.6691342269596491 | 0.7291227257196756 | T | T | T |
| 0.8028684382796297 | 0.5585484626248215 | 0.7432213993585777 | T | T | T |
| 0.5851619781644584 | 0.5472587055681865 | 0.7076621800458923 | T | T | T |
| 0.9297506827374812 | 0.3705984457429953 | 0.9065435513433018 | T | T | T |
| 0.9013440394750544 | 0.4996798461056134 | 0.9098388667209139 | T | T | T |
| 0.8884462370329432 | 0.6320823277806101 | 0.9254681425076419 | T | T | T |
| 0.6754509832834522 | 0.3744492708651971 | 0.9442943367978452 | T | T | T |
| 0.6720722548421791 | 0.5077735779488979 | 0.9178386297032840 | T | T | T |
| 0.7022910005412897 | 0.6371078961153596 | 0.9209644696624226 | T | T | T |
| 0.4875963155670138 | 0.4570105746538709 | 0.7106012398806892 | T | T | T |
| 0.4831199074335388 | 0.6343004837743117 | 0.7242738572991493 | T | T | T |
| 0.6396008896063192 | 0.9372500621770515 | 0.2939158334983685 | T | T | T |
| 0.6950856486633641 | 0.9349424980075505 | 0.1156763015827861 | T | T | T |
| 0.7980513042121862 | 0.9499108356326351 | 0.9888029113567912 | T | T | T |
| 0.9002841181195630 | 0.9289940644795573 | 0.1120816692364197 | T | T | T |
| 0.8945830856337899 | 0.9450471017169076 | 0.3096724774184260 | T | T | T |
| 0.7683176578479641 | 0.9670347116123069 | 0.2710437483774066 | T | T | T |
| 0.6411362846302574 | 0.1753741333955203 | 0.2579047945040063 | T | T | T |
| 0.6952755329437642 | 0.1528988081435500 | 0.0848340713205728 | T | T | T |

**Structure files (CONTCAR) involved in this work:**

|                    |                    |                    |   |   |   |
|--------------------|--------------------|--------------------|---|---|---|
| 0.8081476312817021 | 0.1474430054761334 | 0.9845858105135220 | T | T | T |
| 0.9085478799057399 | 0.1723427436669744 | 0.1103442469150486 | T | T | T |
| 0.8958174948400218 | 0.1544202824879587 | 0.3058622208433659 | T | T | T |
| 0.7703772176838952 | 0.1427116739629069 | 0.2492868618700526 | T | T | T |
| 0.6755581541159340 | 0.0520364488234572 | 0.2097297352443335 | T | T | T |
| 0.9172955496792453 | 0.0496108208079804 | 0.1865763859880570 | T | T | T |
| 0.5658083437322519 | 0.8743736097336007 | 0.4291889847299710 | T | T | T |
| 0.5791727020023679 | 0.0065278678142566 | 0.4415908104682356 | T | T | T |
| 0.6017610645796069 | 0.1376827589032980 | 0.4391388313048069 | T | T | T |
| 0.8032943827273256 | 0.8656549790131185 | 0.3921095801998853 | T | T | T |
| 0.8154202814796351 | 0.9919872969496644 | 0.4532044180323938 | T | T | T |
| 0.8042585749578742 | 0.1260155815839781 | 0.4412257539390217 | T | T | T |
| 0.0095436452226375 | 0.9550170010329546 | 0.2200207456230075 | T | T | T |
| 0.0140206599259890 | 0.1383450599827662 | 0.2194516353712508 | T | T | T |
| 0.8573147262786027 | 0.0675302492193344 | 0.7929667710158915 | T | T | T |
| 0.8015363140963708 | 0.0656314671751996 | 0.6145406868635795 | T | T | T |
| 0.6993246170944255 | 0.0509637389624878 | 0.4864815142628316 | T | T | T |
| 0.5980427296974254 | 0.0751835553248955 | 0.6106581340370876 | T | T | T |
| 0.6023053605100757 | 0.0527977222402331 | 0.8076579661492579 | T | T | T |
| 0.7292689318538907 | 0.0317366165427005 | 0.7704970243534723 | T | T | T |
| 0.8545735024635490 | 0.8264463659174263 | 0.7648364601804545 | T | T | T |
| 0.8044925603117657 | 0.8529643871606638 | 0.5882162353091003 | T | T | T |
| 0.6889807745515344 | 0.8523576809073284 | 0.4913936674146778 | T | T | T |
| 0.5867463533563223 | 0.8274998804962708 | 0.6131706072127638 | T | T | T |
| 0.6008314132225836 | 0.8537999716969694 | 0.8060518256203629 | T | T | T |
| 0.7270738897227024 | 0.8635751465818647 | 0.7489945122601811 | T | T | T |
| 0.8263318867412354 | 0.9509557575317052 | 0.7150755454128757 | T | T | T |
| 0.5791253601473574 | 0.9530428047170760 | 0.6772941124862010 | T | T | T |
| 0.9333428506948622 | 0.1263446810758188 | 0.9275835485488327 | T | T | T |
| 0.9168361052340553 | 0.9948073940366424 | 0.9395187446042396 | T | T | T |
| 0.8970739774520835 | 0.8634017073864049 | 0.9441148860157013 | T | T | T |
| 0.6925483564102128 | 0.1331095731881061 | 0.8888434475333084 | T | T | T |
| 0.6813111586107425 | 0.0077818477372092 | 0.9526911464420508 | T | T | T |
| 0.6941986596230203 | 0.8743881890512315 | 0.9430010351554992 | T | T | T |
| 0.4877576684967797 | 0.0472597710386129 | 0.7168154762548790 | T | T | T |
| 0.4820123551002997 | 0.8665204726223565 | 0.7213691070534189 | T | T | T |
| 0.3574850506405247 | 0.4427524172068101 | 0.7115599433956863 | T | T | T |
| 0.3035536937617142 | 0.4285983917402063 | 0.8892312966805173 | T | T | T |
| 0.2063829084424649 | 0.4501513580650844 | 0.0220920086938380 | T | T | T |
| 0.1111598460329344 | 0.4289792553143421 | 0.8851970215662933 | T | T | T |
| 0.1060414709521078 | 0.4538646371073262 | 0.6884220536893092 | T | T | T |
| 0.2305997949417608 | 0.4718234553208286 | 0.7363103139351800 | T | T | T |
| 0.3551904054435914 | 0.6669516305766219 | 0.7291292667810337 | T | T | T |
| 0.3005563371859817 | 0.6685861540089065 | 0.9063244681442675 | T | T | T |
| 0.1920419307335106 | 0.6468398534215067 | 0.0152237141526019 | T | T | T |
| 0.0915380582020143 | 0.6749648768019576 | 0.8920139836229669 | T | T | T |
| 0.1015842369865493 | 0.6546998654311402 | 0.6969592604027128 | T | T | T |
| 0.2274758251592377 | 0.6359348051376824 | 0.7474853430867688 | T | T | T |
| 0.3205190019411521 | 0.5518415356619436 | 0.8157761855677893 | T | T | T |
| 0.0838947202655293 | 0.5514740545652459 | 0.8222141268692331 | T | T | T |
| 0.4311255181817166 | 0.3745016427221290 | 0.5818134876249281 | T | T | T |
| 0.4166440789238479 | 0.5050684248953774 | 0.5584972294616717 | T | T | T |
| 0.4108126598198205 | 0.6380904704475450 | 0.5549086393630800 | T | T | T |

**Structure files (CONTCAR) involved in this work:**

|                    |                    |                    |   |   |   |
|--------------------|--------------------|--------------------|---|---|---|
| 0.1954346495712425 | 0.3732756563395126 | 0.6095845106510634 | T | T | T |
| 0.1895266449213572 | 0.5001789414048501 | 0.5502623432058240 | T | T | T |
| 0.1915687678018490 | 0.6345742718732681 | 0.5547859463669222 | T | T | T |
| 0.9966865750317374 | 0.4528650292217403 | 0.7885834877076370 | T | T | T |
| 0.9848637065615453 | 0.6362858223663503 | 0.7864822601775625 | T | T | T |
| 0.1430367211273155 | 0.5601863306042839 | 0.2082182551515143 | T | T | T |
| 0.2012086017554791 | 0.5707746756588060 | 0.3842696066223903 | T | T | T |
| 0.3022387341606366 | 0.5652680506544910 | 0.5163971400457107 | T | T | T |
| 0.4036743774742426 | 0.5707810522389760 | 0.3873998925068457 | T | T | T |
| 0.4016535373242141 | 0.5563142930860657 | 0.1919878103202128 | T | T | T |
| 0.2728741302240530 | 0.5341397743918019 | 0.2276915359502264 | T | T | T |
| 0.1382048754072202 | 0.3318745104981972 | 0.2418704601724161 | T | T | T |
| 0.1937831619591251 | 0.3421536651180345 | 0.4167376843175916 | T | T | T |
| 0.3091041131319262 | 0.3542267574184760 | 0.5118703106793581 | T | T | T |
| 0.4130154919954899 | 0.3299120416656202 | 0.3952549713245734 | T | T | T |
| 0.3939517405407624 | 0.3400844956929817 | 0.1994860568007516 | T | T | T |
| 0.2687987948159646 | 0.3559703348769300 | 0.2534386884018781 | T | T | T |
| 0.1818925284363126 | 0.4506174381467529 | 0.3029837509693465 | T | T | T |
| 0.4152829918002072 | 0.4494919107343340 | 0.3101420219806149 | T | T | T |
| 0.0686981994282434 | 0.6231607332128851 | 0.0728663432307318 | T | T | T |
| 0.0846794713226661 | 0.4914584039984857 | 0.0560961474645097 | T | T | T |
| 0.1093991847221112 | 0.3599257732346753 | 0.0524171979863090 | T | T | T |
| 0.3115589782524896 | 0.6258256898720573 | 0.0942217902579469 | T | T | T |
| 0.3277989751744210 | 0.4948890545484205 | 0.0567361111086052 | T | T | T |
| 0.3027609047181986 | 0.3622679498677142 | 0.0595007118801734 | T | T | T |
| 0.5152717735708240 | 0.5368824508403965 | 0.2872555785784809 | T | T | T |
| 0.5132193225201450 | 0.3614376705336582 | 0.2731061744331618 | T | T | T |
| 0.4409763320402852 | 0.7504757494028077 | 0.6453738161667276 | T | T | T |
| 0.1927392719903085 | 0.7488823080474861 | 0.6521016680888599 | T | T | T |
| 0.2725589443982279 | 0.7493258153318153 | 0.0574984658581761 | T | T | T |
| 0.1079079343419020 | 0.7488105279260188 | 0.0534954536439794 | T | T | T |
| 0.0607305356554665 | 0.2507730174665382 | 0.1371768761665258 | T | T | T |
| 0.3038922605626805 | 0.2465516150345832 | 0.1522197303581928 | T | T | T |
| 0.2269734999554318 | 0.2519208164444922 | 0.5552373161959152 | T | T | T |
| 0.3901559562716935 | 0.2510654003210947 | 0.5511342991704925 | T | T | T |
| 0.5598858667280890 | 0.2515039643709788 | 0.3615364029965181 | T | T | T |
| 0.8070522815756668 | 0.2469094834138490 | 0.3660729322524059 | T | T | T |
| 0.7242364442203643 | 0.2510700042386105 | 0.9560079360581848 | T | T | T |
| 0.8899747581581063 | 0.2501419175856739 | 0.9527474322849974 | T | T | T |
| 0.9363012321503155 | 0.7483494628371601 | 0.8673631587789512 | T | T | T |
| 0.6871071818237612 | 0.7586761188586857 | 0.8591589165053420 | T | T | T |
| 0.7734039906530649 | 0.7493047415748998 | 0.4773602729075469 | T | T | T |
| 0.6060617236745320 | 0.7495391830524162 | 0.4570903506078322 | T | T | T |
| 0.8863559762553148 | 0.4176370836544784 | 0.5891440892465032 | T | T | T |
| 0.9943729366142092 | 0.2889153896297861 | 0.5308309020879921 | T | T | T |
| 0.9281142128915072 | 0.5979729010627384 | 0.4346854091265985 | T | T | T |
| 0.9283210945749431 | 0.6636038811774490 | 0.3428576512744482 | T | T | T |
| 0.9944741122853843 | 0.6015164932549835 | 0.3438884100464898 | T | T | T |
| 0.9683531536168364 | 0.4516766167015076 | 0.4583938474186687 | T | T | T |
| 0.9740682787843667 | 0.5039333333221584 | 0.5694193670614941 | T | T | T |
| 0.0141661986688072 | 0.4233922123398029 | 0.5674196504906789 | T | T | T |
| 0.9772658161064438 | 0.2913179635998431 | 0.4807845245012034 | T | T | T |
| 0.9415280541208173 | 0.6111458543373680 | 0.3576629406177917 | T | T | T |

**Structure files (CONTCAR) involved in this work:**

0.9715578393692503 0.4523808541243294 0.5401599264238000 T T T

**Figure 4(a) Route(a)-Zn ①**

Si Al O Zn H C

1.0000000000000000

20.0219999999999985 0.0000000000000000 0.0000000000000000

0.0000000000000000 19.8990000000000009 0.0000000000000000

0.0000000000000000 0.0000000000000000 13.3829999999999991

93 3 193 2 6 2

Selective dynamics

Direct

0.4220286184494478 0.0602459319619886 0.6482533681849786 T T T

0.3046437756275998 0.0319693037701075 0.7921428620614205 T T T

0.2818304766939824 0.0568346819876415 0.0168399819414755 T T T

0.1221790636780554 0.0629262540029749 0.0114214015584226 T T T

0.0674197380159968 0.0312081857589771 0.8002081787068092 T T T

0.1800114597873847 0.0646669792269655 0.6644608039541638 T T T

0.4185702166327666 0.8273948719990332 0.6690457997116546 T T T

0.3008570793684506 0.8729953652821695 0.8014550193429117 T T T

0.2669966672011118 0.8303290804227184 0.0207253762542668 T T T

0.1109717770124929 0.8265439150241740 0.0133202485801415 T T T

0.0657712073029093 0.8743878139407647 0.7990815422788105 T T T

0.1791510969008961 0.8289467821337591 0.6655688803672835 T T T

0.0754292606067521 0.9411971819096507 0.1486841487756109 T T T

0.1943157859056362 0.9701284603737265 0.2906885591395151 T T T

0.2164791680914161 0.9434597602550789 0.5160721485616721 T T T

0.3768258598094399 0.9355072203906708 0.5136283574576126 T T T

0.4330366839704806 0.9687625630264327 0.3015835951647655 T T T

0.3197235963795919 0.9359501288629213 0.1642815007054672 T T T

0.0812821208752062 0.1725554813445844 0.1664517828216905 T T T

0.1975788984683742 0.1289846393706683 0.3015925521453306 T T T

0.2311695721226729 0.1696862321788728 0.5191661183020128 T T T

0.3865760620763406 0.1739624607068047 0.5088956698762228 T T T

0.4348488853823640 0.1271342902389599 0.2958655990441953 T T T

0.3185361387765717 0.1724526620066881 0.1666550129819732 T T T

0.5788590499138543 0.5556297166285253 0.3560327143872797 T T T

0.6915136176652430 0.5271983732148281 0.2017595547749438 T T T

0.7156189244028255 0.5683410275976346 0.9862544077930963 T T T

0.8747213170109563 0.5729029089942886 0.9871517599810216 T T T

0.8101443184364794 0.5510712773964044 0.3455987201350447 T T T

0.5728575625822391 0.3291462453157553 0.3320011820844636 T T T

0.6947595282501647 0.3729862585791177 0.1946140584949426 T T T

0.7317335377189130 0.3278307919367314 0.9803571104368641 T T T

0.8865010967515463 0.3257126138355232 0.9924415316255191 T T T

0.9421938822055784 0.3735082442992823 0.1912449086536993 T T T

0.9200998681680563 0.4454316711635307 0.8609023344493167 T T T

0.8006232044372494 0.4733389824073734 0.7202092559645162 T T T

0.7763884319855692 0.4368176828688773 0.4963252383366229 T T T

0.6202804606757878 0.4281272825871317 0.4897304395092776 T T T

0.5703437627105306 0.4693838618770274 0.7015546931070510 T T T

0.6764245891220499 0.4478489489309324 0.8573329647659331 T T T

0.9207690196999230 0.6784079555295703 0.8298111533411037 T T T

0.7690745915292783 0.6690440797653198 0.4660420469130296 T T T

**Structure files (CONTCAR) involved in this work:**

|                    |                    |                    |   |   |   |
|--------------------|--------------------|--------------------|---|---|---|
| 0.6139637545356308 | 0.6735363421051662 | 0.4884151200094073 | T | T | T |
| 0.5605636083794808 | 0.6276522627969130 | 0.6981796482878576 | T | T | T |
| 0.6731656488540310 | 0.6743380596318918 | 0.8262160429941640 | T | T | T |
| 0.5775573691164193 | 0.9454808841463146 | 0.3581516688764039 | T | T | T |
| 0.6980642806710103 | 0.9745546691792076 | 0.2151727778965012 | T | T | T |
| 0.7190947756196231 | 0.9388115228066692 | 0.9930954010463864 | T | T | T |
| 0.8789244413744908 | 0.9347707566652658 | 0.9946649752967879 | T | T | T |
| 0.9306823620073403 | 0.9714422421941266 | 0.2051245198707794 | T | T | T |
| 0.8218596558180968 | 0.9463091138615594 | 0.3546174407142274 | T | T | T |
| 0.5778482220027371 | 0.1741011683538391 | 0.3293712132152886 | T | T | T |
| 0.6976348669858691 | 0.1328716876951509 | 0.1937692849330542 | T | T | T |
| 0.7325494649934874 | 0.1716469122660102 | 0.9721937802399607 | T | T | T |
| 0.8872006681771474 | 0.1734489541623077 | 0.9831531616075423 | T | T | T |
| 0.9350268637168936 | 0.1297646713666078 | 0.1982769587245857 | T | T | T |
| 0.8196166965668954 | 0.1747408939427691 | 0.3324734586017022 | T | T | T |
| 0.9229897785079029 | 0.0543889569674298 | 0.8556896049551536 | T | T | T |
| 0.8016090444041747 | 0.0262698260988192 | 0.7104725890875231 | T | T | T |
| 0.7808251887571470 | 0.0653893467655920 | 0.4921549631728933 | T | T | T |
| 0.6206011225969483 | 0.0698881070439946 | 0.4899291412627360 | T | T | T |
| 0.5674577352752276 | 0.0327104827219103 | 0.6989157424173736 | T | T | T |
| 0.6779697539253513 | 0.0543218689775667 | 0.8493785526758125 | T | T | T |
| 0.9229654143397792 | 0.8305658017644550 | 0.8376417203531399 | T | T | T |
| 0.8029195349158813 | 0.8687871318594660 | 0.6957166794598283 | T | T | T |
| 0.7694152913057271 | 0.8269913771093893 | 0.4780641695973149 | T | T | T |
| 0.6144862370638272 | 0.8271271291316470 | 0.4901575577077718 | T | T | T |
| 0.5634284811596001 | 0.8753735931113739 | 0.6981946297120863 | T | T | T |
| 0.6784729714996185 | 0.8330169685166399 | 0.8331668418095249 | T | T | T |
| 0.4236286783405066 | 0.4420578926511448 | 0.6446702544523610 | T | T | T |
| 0.3053787439564127 | 0.4695087996403269 | 0.7884015819335414 | T | T | T |
| 0.2794996119921874 | 0.4455308592638066 | 0.0146293081235916 | T | T | T |
| 0.1216374609999798 | 0.4376291021598540 | 0.0148633419759613 | T | T | T |
| 0.0638067000699340 | 0.4699618699101044 | 0.8017639799372754 | T | T | T |
| 0.1774128662844494 | 0.4365351429940116 | 0.6629711465676060 | T | T | T |
| 0.4154697478060307 | 0.6735478377121895 | 0.6669960484340133 | T | T | T |
| 0.3007157081448158 | 0.6279118319347000 | 0.8010162147745725 | T | T | T |
| 0.2670336449024177 | 0.6690284424532140 | 0.0201848167587295 | T | T | T |
| 0.1114715885908133 | 0.6729576537720227 | 0.0090033556597487 | T | T | T |
| 0.0631968516230318 | 0.6285382673993499 | 0.7943829358128751 | T | T | T |
| 0.1797014986258464 | 0.6718564703588478 | 0.6643993318905975 | T | T | T |
| 0.0781153232198825 | 0.5592837753070877 | 0.1489267363615295 | T | T | T |
| 0.1964650460558105 | 0.5292960303264489 | 0.2899214954557572 | T | T | T |
| 0.2148368810718978 | 0.5563792903546341 | 0.5156670702361535 | T | T | T |
| 0.3738761077319661 | 0.5658221604949065 | 0.5136948154324295 | T | T | T |
| 0.4308325786549433 | 0.5311853999837710 | 0.3043849591501758 | T | T | T |
| 0.3215663993768238 | 0.5632818041525887 | 0.1628286824132975 | T | T | T |
| 0.0863877581358372 | 0.3248477964282164 | 0.1611253401490083 | T | T | T |
| 0.1982372395147867 | 0.3711058230898898 | 0.3006723906917881 | T | T | T |
| 0.2299809065307872 | 0.3310035646102673 | 0.5192763414877244 | T | T | T |
| 0.3847674816690139 | 0.3279679752991484 | 0.5059130748434925 | T | T | T |
| 0.4304659541005930 | 0.3740959261042820 | 0.2930514607853213 | T | T | T |
| 0.3166195190063676 | 0.3300793493799062 | 0.1628200241653111 | T | T | T |
| 0.9219109140840478 | 0.5292003306788400 | 0.1967827779960549 | T | T | T |
| 0.8233630305198010 | 0.3360271497778605 | 0.3293482217948649 | T | T | T |

**Structure files (CONTCAR) involved in this work:**

|                    |                    |                    |   |   |   |
|--------------------|--------------------|--------------------|---|---|---|
| 0.7997232700130550 | 0.6360964645739052 | 0.6941916278014740 | T | T | T |
| 0.0113001008935738 | 0.5564958771745251 | 0.2285892566631921 | T | T | T |
| 0.3582060935039043 | 0.0705354813998744 | 0.7216350862242553 | T | T | T |
| 0.3160731628289582 | 0.0548841244789100 | 0.9069890481093641 | T | T | T |
| 0.2016499220788724 | 0.0482286207311699 | 0.0071973077721138 | T | T | T |
| 0.0920336440441267 | 0.0703238522765089 | 0.8999489372005492 | T | T | T |
| 0.1032269535288190 | 0.0641924178930283 | 0.7029759316623607 | T | T | T |
| 0.2289690128257743 | 0.0517224035045562 | 0.7596668121802558 | T | T | T |
| 0.3595952598887123 | 0.8280387833817567 | 0.7522922367951164 | T | T | T |
| 0.3008723235688417 | 0.8610297702405384 | 0.9208114788577647 | T | T | T |
| 0.1883451238700417 | 0.8506485115314698 | 0.0237353625563365 | T | T | T |
| 0.0880771239661828 | 0.8325357227262969 | 0.8978213292439069 | T | T | T |
| 0.1023861475294735 | 0.8409840787887131 | 0.7021442106268746 | T | T | T |
| 0.2285309047408684 | 0.8510025660347166 | 0.7567100815347947 | T | T | T |
| 0.3156314290717838 | 0.9515399777547370 | 0.7773545387339552 | T | T | T |
| 0.0887214650396977 | 0.9523888101038710 | 0.8100811463664122 | T | T | T |
| 0.4322024743848211 | 0.1278915309410461 | 0.5818072517897521 | T | T | T |
| 0.4118464646093478 | 0.9966497605597161 | 0.5739513171239219 | T | T | T |
| 0.3929970231959537 | 0.8645148748762227 | 0.5680067551729350 | T | T | T |
| 0.1957030848805665 | 0.1380777667647247 | 0.6171423393361974 | T | T | T |
| 0.1896496747289559 | 0.0060942881774526 | 0.5817527904878986 | T | T | T |
| 0.1943131781914871 | 0.8723857418027547 | 0.5656160495497309 | T | T | T |
| 0.9874596690831191 | 0.0395285104428469 | 0.7853816095861348 | T | T | T |
| 0.9852383253796846 | 0.8707787096899769 | 0.7859603619944038 | T | T | T |
| 0.1397349102190553 | 0.9321121432716091 | 0.2213549602449045 | T | T | T |
| 0.1830718357482083 | 0.9481558575354506 | 0.4059191856461646 | T | T | T |
| 0.2970102847975254 | 0.9480736018228361 | 0.5086083745241193 | T | T | T |
| 0.4071129381379561 | 0.9313542105626843 | 0.4019604308330370 | T | T | T |
| 0.3959847017085861 | 0.9364412645449414 | 0.2049014311795175 | T | T | T |
| 0.2695509158426977 | 0.9489488187418386 | 0.2581013903681424 | T | T | T |
| 0.1393210900100940 | 0.1737328237886038 | 0.2510130625249579 | T | T | T |
| 0.1941425769337698 | 0.1396251385290322 | 0.4211934433715311 | T | T | T |
| 0.3094619001236604 | 0.1481990218897668 | 0.5156186442515586 | T | T | T |
| 0.4126892079836257 | 0.1686686746100581 | 0.3948240667660015 | T | T | T |
| 0.3955959184433481 | 0.1585017984809419 | 0.1997693592422274 | T | T | T |
| 0.2704894621029984 | 0.1526492844141371 | 0.2607769077078287 | T | T | T |
| 0.1844755017830222 | 0.0505564878256329 | 0.2745787188524280 | T | T | T |
| 0.4152012162418734 | 0.0484479313773139 | 0.3094487028603491 | T | T | T |
| 0.0645103786943140 | 0.8719859552076747 | 0.0859394916701903 | T | T | T |
| 0.0853143140965284 | 0.0017394931237455 | 0.0690314906113319 | T | T | T |
| 0.1074725469628017 | 0.1328939097975859 | 0.0684839549173474 | T | T | T |
| 0.3047258608718084 | 0.8624265151899283 | 0.1165136707798267 | T | T | T |
| 0.3109867352565907 | 0.9946535885693903 | 0.0814056154097065 | T | T | T |
| 0.2998406772231272 | 0.1282743117048707 | 0.0687428041506881 | T | T | T |
| 0.5125847112432363 | 0.9565729542476819 | 0.2874079059052784 | T | T | T |
| 0.5149111214617126 | 0.1342818354776195 | 0.2791435901763006 | T | T | T |
| 0.6385272425511458 | 0.5632530039820699 | 0.2757657895323963 | T | T | T |
| 0.6994691462787787 | 0.5751162305289562 | 0.1047485738572165 | T | T | T |
| 0.7952440190624307 | 0.5606125227313759 | 0.9654727695647873 | T | T | T |
| 0.8911209679002168 | 0.5797553854231156 | 0.1043562368400158 | T | T | T |
| 0.8867582202627003 | 0.5356063600059288 | 0.3161160281244116 | T | T | T |
| 0.7632246109659412 | 0.5228834837721028 | 0.2583102671006675 | T | T | T |
| 0.6387783770075026 | 0.3363246090478528 | 0.2641068257233135 | T | T | T |

**Structure files (CONTCAR) involved in this work:**

|                    |                    |                    |   |   |   |
|--------------------|--------------------|--------------------|---|---|---|
| 0.6937411599256560 | 0.3350957543010773 | 0.0865563330347962 | T | T | T |
| 0.8093649678896351 | 0.3517367288085805 | 0.9912628532242835 | T | T | T |
| 0.9136298066984674 | 0.3214416500999689 | 0.1071538771256106 | T | T | T |
| 0.9078007642600054 | 0.3578760646051345 | 0.2999920316618585 | T | T | T |
| 0.7670355876764894 | 0.3697435656773527 | 0.2457713001418161 | T | T | T |
| 0.6698487921223709 | 0.4507641394941727 | 0.1756470142868014 | T | T | T |
| 0.9290233943189937 | 0.4488572238776330 | 0.1554919410097135 | T | T | T |
| 0.5697971253475850 | 0.6265549877774482 | 0.4144121359996232 | T | T | T |
| 0.5950320481140754 | 0.4973065332627486 | 0.4376816241301727 | T | T | T |
| 0.5826148278007720 | 0.3639111011097466 | 0.4415433759756964 | T | T | T |
| 0.7978190678715494 | 0.6307926278337274 | 0.3670522378302422 | T | T | T |
| 0.7922052669968980 | 0.5143875424743678 | 0.4549974854136711 | T | T | T |
| 0.8284476486834458 | 0.3868245845999385 | 0.4406398865862888 | T | T | T |
| 0.0223672770705235 | 0.3632824301404672 | 0.2064626083998290 | T | T | T |
| 0.8548873747592743 | 0.4351585133969494 | 0.7894852510004866 | T | T | T |
| 0.7912273351104545 | 0.4335894981087089 | 0.6146994717203071 | T | T | T |
| 0.7001047955467339 | 0.4184544611498831 | 0.4694792737129693 | T | T | T |
| 0.6059204063924269 | 0.4303532018392420 | 0.6086304648968399 | T | T | T |
| 0.6029890480503102 | 0.4444399537449633 | 0.8060814267081304 | T | T | T |
| 0.7285688334064974 | 0.4757249461128340 | 0.7737197247440163 | T | T | T |
| 0.8603826397994501 | 0.6818199417463886 | 0.7523931443879338 | T | T | T |
| 0.8154512624155835 | 0.6436144535236129 | 0.5609375229962980 | T | T | T |
| 0.6917286104413937 | 0.6480988747052983 | 0.4877051900917595 | T | T | T |
| 0.5841800845820712 | 0.6694048562320839 | 0.6002302213161111 | T | T | T |
| 0.5947272233833564 | 0.6605818787047955 | 0.7966765098225403 | T | T | T |
| 0.7199127901775213 | 0.6506096532408767 | 0.7346203678849166 | T | T | T |
| 0.8255412219824342 | 0.5496837207759028 | 0.6940756392507236 | T | T | T |
| 0.5818414443630086 | 0.5493803582910503 | 0.6852392451490241 | T | T | T |
| 0.9313380031549610 | 0.3769941638953607 | 0.9256102746378362 | T | T | T |
| 0.9134712024642629 | 0.5093697862013052 | 0.9351269543165579 | T | T | T |
| 0.9001192079378832 | 0.6414219219948375 | 0.9334835057657785 | T | T | T |
| 0.6959389741317910 | 0.3732145335526451 | 0.8950213103392015 | T | T | T |
| 0.6765098157538905 | 0.5008552675256709 | 0.9492352402473299 | T | T | T |
| 0.6882583087885407 | 0.6345302368898322 | 0.9299664881677572 | T | T | T |
| 0.4914434678364007 | 0.4514319592869246 | 0.7086398923207028 | T | T | T |
| 0.4796488427351601 | 0.6322062761977190 | 0.7085018879557117 | T | T | T |
| 0.6433458664780979 | 0.9403262557395957 | 0.2883382338295387 | T | T | T |
| 0.6983496006511893 | 0.9339910036184856 | 0.1099788730694149 | T | T | T |
| 0.7994409099303782 | 0.9474928284948955 | 0.9803442843526005 | T | T | T |
| 0.8982867037593674 | 0.9300639985985519 | 0.1121079639246874 | T | T | T |
| 0.8971929684766612 | 0.9478300219891574 | 0.3098016838534444 | T | T | T |
| 0.7714628468632583 | 0.9686596484113671 | 0.2655587092532931 | T | T | T |
| 0.6397025615774861 | 0.1742018380979329 | 0.2517996578450620 | T | T | T |
| 0.6966892142840435 | 0.1574185675790127 | 0.0785477452497790 | T | T | T |
| 0.8101650922056303 | 0.1472771655275425 | 0.9786402736929612 | T | T | T |
| 0.9137695591813418 | 0.1691200449303096 | 0.0971464841164742 | T | T | T |
| 0.8961759562762804 | 0.1599811385007916 | 0.2944803228474772 | T | T | T |
| 0.7699756530648528 | 0.1470813645313669 | 0.2438794184455431 | T | T | T |
| 0.6797601457423484 | 0.0531523710108737 | 0.1985562002143526 | T | T | T |
| 0.9176058568132730 | 0.0506637356954167 | 0.1849191559734684 | T | T | T |
| 0.5692847178296889 | 0.8754473676420567 | 0.4197176818132952 | T | T | T |
| 0.5818973146770933 | 0.0072233557235933 | 0.4375421488185979 | T | T | T |
| 0.5996355079909415 | 0.1393371598235345 | 0.4344800581359121 | T | T | T |



**Structure files (CONTCAR) involved in this work:**

|                    |                    |                    |   |   |   |
|--------------------|--------------------|--------------------|---|---|---|
| 0.8068717363565797 | 0.8702900989044504 | 0.3924705162624756 | T | T | T |
| 0.8158786314283656 | 0.9976990491209388 | 0.4482874256227240 | T | T | T |
| 0.8064038388288197 | 0.1318092398928467 | 0.4345250657874980 | T | T | T |
| 0.0099778680539911 | 0.9556807170032572 | 0.2161255610725502 | T | T | T |
| 0.0151537293886361 | 0.1386643694193017 | 0.2151551966471478 | T | T | T |
| 0.8568482970248156 | 0.0563588845012128 | 0.7864412542191820 | T | T | T |
| 0.8012043726774387 | 0.0714375954140725 | 0.6094283226738291 | T | T | T |
| 0.7003028290172517 | 0.0572497861953239 | 0.4801275417722288 | T | T | T |
| 0.5983604999530761 | 0.0759014256130365 | 0.6063472789693141 | T | T | T |
| 0.6029528545497181 | 0.0530537309809040 | 0.8035644786699674 | T | T | T |
| 0.7283974423611859 | 0.0290267784955130 | 0.7620677860593971 | T | T | T |
| 0.8599949790563886 | 0.8334113193944872 | 0.7623634547765917 | T | T | T |
| 0.8055092005081279 | 0.8347346747332544 | 0.5857430887926582 | T | T | T |
| 0.6921008607390747 | 0.8517956923741801 | 0.4862027236936402 | T | T | T |
| 0.5879355132169855 | 0.8295590540211045 | 0.6045818983398271 | T | T | T |
| 0.6028680972968528 | 0.8530385674183456 | 0.7988673544229791 | T | T | T |
| 0.7297215826535109 | 0.8570560238286602 | 0.7452432788732847 | T | T | T |
| 0.8186408414708707 | 0.9484587864555067 | 0.6847195841099426 | T | T | T |
| 0.5786439387466025 | 0.9536484835527633 | 0.6729067739840537 | T | T | T |
| 0.9325309786437744 | 0.1269199291779490 | 0.9099409947673858 | T | T | T |
| 0.9185149258064895 | 0.9967322212385237 | 0.9418473932388819 | T | T | T |
| 0.9018741493466560 | 0.8645160336517141 | 0.9436150463097474 | T | T | T |
| 0.6950725943963203 | 0.1303983392761238 | 0.8840015477755886 | T | T | T |
| 0.6823202575861990 | 0.0042014258260895 | 0.9451082410849089 | T | T | T |
| 0.6955777291993648 | 0.8702987506977428 | 0.9379841218389774 | T | T | T |
| 0.4885474185447016 | 0.0484967603363958 | 0.7146809279121511 | T | T | T |
| 0.4837836237629543 | 0.8645053946584117 | 0.7158029495658776 | T | T | T |
| 0.3609574789983654 | 0.4314322111714852 | 0.7206683844968991 | T | T | T |
| 0.3123855203895158 | 0.4459354870546337 | 0.9038978354467627 | T | T | T |
| 0.1994360848455048 | 0.4609317122150465 | 0.0100436771533230 | T | T | T |
| 0.0897583042869773 | 0.4353710184981027 | 0.9046501337953199 | T | T | T |
| 0.1020886443272767 | 0.4357432973342579 | 0.7074721474243972 | T | T | T |
| 0.2301513925110026 | 0.4507580957069042 | 0.7526628176090762 | T | T | T |
| 0.3583964693890124 | 0.6748238687248140 | 0.7533201468008333 | T | T | T |
| 0.3011719668311330 | 0.6378897653221536 | 0.9207956356776461 | T | T | T |
| 0.1883962949798684 | 0.6479069033835025 | 0.0208498516283249 | T | T | T |
| 0.0879236077429479 | 0.6682568245761777 | 0.8940722622721019 | T | T | T |
| 0.1026570493794948 | 0.6589738146951414 | 0.6979349839179285 | T | T | T |
| 0.2279515181020436 | 0.6488558595401136 | 0.7565152488594917 | T | T | T |
| 0.3170077253371422 | 0.5499124299572135 | 0.7748436300488035 | T | T | T |
| 0.0818097408875920 | 0.5495300609323034 | 0.8066517909188901 | T | T | T |
| 0.4318014442451504 | 0.3762418057176382 | 0.5736293582354283 | T | T | T |
| 0.4135240145353020 | 0.5075861740029052 | 0.5739405993990171 | T | T | T |
| 0.3847429261432456 | 0.6381361127732404 | 0.5672836351252915 | T | T | T |
| 0.1920800197948289 | 0.3630912876837270 | 0.6150120755704287 | T | T | T |
| 0.1822284964997831 | 0.4951156821964701 | 0.5785907491330616 | T | T | T |
| 0.1961407653242470 | 0.6286509561190607 | 0.5641678568837901 | T | T | T |
| 0.9845984485601685 | 0.4567754329038865 | 0.7885792485150638 | T | T | T |
| 0.9838541784400260 | 0.6382849758840075 | 0.7780943069170771 | T | T | T |
| 0.1433596717501068 | 0.5692009551934706 | 0.2185020580386892 | T | T | T |
| 0.1831454348917092 | 0.5540381543534036 | 0.4034596951274828 | T | T | T |
| 0.2950274548240926 | 0.5465093808707706 | 0.5105596101303850 | T | T | T |
| 0.4029995372857983 | 0.5714038234243691 | 0.4012954388814806 | T | T | T |

**Structure files (CONTCAR) involved in this work:**

|                    |                    |                    |   |   |   |
|--------------------|--------------------|--------------------|---|---|---|
| 0.3975888174329274 | 0.5638752764741481 | 0.2044933020031355 | T | T | T |
| 0.2718740143967489 | 0.5477409855131637 | 0.2570189226067960 | T | T | T |
| 0.1432916484202709 | 0.3237398556142950 | 0.2475859402176024 | T | T | T |
| 0.1938335954300330 | 0.3606069808167531 | 0.4200060453845582 | T | T | T |
| 0.3078894198529976 | 0.3538327573864094 | 0.5181521045614437 | T | T | T |
| 0.4064117873368044 | 0.3301905541383603 | 0.3891277046581240 | T | T | T |
| 0.3936796069362122 | 0.3470561959270647 | 0.1920202713885983 | T | T | T |
| 0.2719883480930246 | 0.3513204793156474 | 0.2601613836237215 | T | T | T |
| 0.1817432271328084 | 0.4496215650336686 | 0.2752963928600731 | T | T | T |
| 0.4103889090279040 | 0.4522165603121557 | 0.3133705705378451 | T | T | T |
| 0.0654886404684066 | 0.6243396563249848 | 0.0796216675044329 | T | T | T |
| 0.0795529700084493 | 0.4911329330381832 | 0.0845003554803144 | T | T | T |
| 0.1155379371373579 | 0.3632587288128590 | 0.0629272384470525 | T | T | T |
| 0.3038069876502936 | 0.6365803350413844 | 0.1168238957678224 | T | T | T |
| 0.3141388253996803 | 0.5048982416003075 | 0.0791903017385196 | T | T | T |
| 0.2930542979636370 | 0.3725284093181676 | 0.0651474370962484 | T | T | T |
| 0.5109748328502883 | 0.5384142166656544 | 0.2955462924296415 | T | T | T |
| 0.5102263559858308 | 0.3657739456802115 | 0.2759795363321453 | T | T | T |
| 0.4362498489018152 | 0.7501640068860873 | 0.6402701798089361 | T | T | T |
| 0.1910080202601963 | 0.7504208214939977 | 0.6375163086256098 | T | T | T |
| 0.2756305897953796 | 0.7495426386500725 | 0.0234801513527176 | T | T | T |
| 0.1030427980866588 | 0.7489981258264528 | 0.0495055541856924 | T | T | T |
| 0.0664873347461023 | 0.2489684612252302 | 0.1305193505299883 | T | T | T |
| 0.3079415166501011 | 0.2509783895432318 | 0.1373928125137143 | T | T | T |
| 0.2231046513780265 | 0.2503975631396771 | 0.5233388999738730 | T | T | T |
| 0.3917368529567161 | 0.2514156914156953 | 0.5458593919617644 | T | T | T |
| 0.5555737555702075 | 0.2508024692112658 | 0.3523174578520039 | T | T | T |
| 0.8094683490141696 | 0.2528086078361529 | 0.3549713025226864 | T | T | T |
| 0.7279082052090050 | 0.2504408371539393 | 0.9430460220399596 | T | T | T |
| 0.8921897563321869 | 0.2507542194210785 | 0.9447079864126179 | T | T | T |
| 0.9458612195364153 | 0.7539469575927424 | 0.8592195149883263 | T | T | T |
| 0.6837978566468300 | 0.7533409229401936 | 0.8518076825942407 | T | T | T |
| 0.7746706183505724 | 0.7486308976842634 | 0.4455844433488184 | T | T | T |
| 0.6090469637515623 | 0.7505126529202549 | 0.4491252918678184 | T | T | T |
| 0.9362267232618225 | 0.4928328422362410 | 0.5319594638732478 | T | T | T |
| 0.9264532050331020 | 0.4246847419155083 | 0.4341551478388250 | T | T | T |
| 0.8734122216985216 | 0.5574940367557576 | 0.5564841289043113 | T | T | T |
| 0.0437616622064909 | 0.4234779671496146 | 0.5097211514082635 | T | T | T |
| 0.0487100553722366 | 0.4317946975943185 | 0.3724575459887962 | T | T | T |
| 0.0279333904510821 | 0.3500488222131486 | 0.4270623757866561 | T | T | T |
| 0.0092553811554763 | 0.5611566110285376 | 0.3855231340498183 | T | T | T |
| 0.9773467784135557 | 0.6343276132547814 | 0.3221880719046415 | T | T | T |
| 0.0659623666528224 | 0.6193186751051815 | 0.3264108632497529 | T | T | T |
| 0.0282922172718599 | 0.4047478001469966 | 0.4366376838935000 | T | T | T |
| 0.0165706873214184 | 0.5959894644960673 | 0.3229406323610237 | T | T | T |

**Figure 4(a) Route(a)-Zn ②**

Si Al O Zn H C

|                     |                     |                     |
|---------------------|---------------------|---------------------|
| 1.0000000000000000  |                     |                     |
| 20.0219999999999985 | 0.0000000000000000  | 0.0000000000000000  |
| 0.0000000000000000  | 19.8990000000000009 | 0.0000000000000000  |
| 0.0000000000000000  | 0.0000000000000000  | 13.3829999999999991 |
| 93                  | 3                   | 193                 |
| 2                   | 6                   | 2                   |

**Structure files (CONTCAR) involved in this work:**

## Selective dynamics

## Direct

|                    |                    |                    |   |   |   |
|--------------------|--------------------|--------------------|---|---|---|
| 0.4233100000000007 | 0.0616399999999970 | 0.6477999999999966 | T | T | T |
| 0.3049299999999988 | 0.0319300000000027 | 0.7900100000000023 | T | T | T |
| 0.2831499999999991 | 0.0572799999999987 | 0.0157099999999986 | T | T | T |
| 0.1233900000000006 | 0.0642500000000013 | 0.0120099999999965 | T | T | T |
| 0.0680899999999980 | 0.0321599999999975 | 0.8005799999999965 | T | T | T |
| 0.1796799999999976 | 0.0655900000000003 | 0.6634400000000014 | T | T | T |
| 0.4183099999999982 | 0.8291699999999977 | 0.6653299999999973 | T | T | T |
| 0.3014799999999980 | 0.8730199999999968 | 0.7996100000000013 | T | T | T |
| 0.2680199999999999 | 0.8327799999999996 | 0.0188300000000012 | T | T | T |
| 0.1130199999999988 | 0.8278699999999972 | 0.0097000000000023 | T | T | T |
| 0.0666000000000011 | 0.8753799999999998 | 0.7959499999999977 | T | T | T |
| 0.1801999999999992 | 0.8287499999999994 | 0.6639499999999998 | T | T | T |
| 0.0772100000000009 | 0.9412599999999998 | 0.1476600000000019 | T | T | T |
| 0.1953499999999977 | 0.9707000000000008 | 0.2902199999999979 | T | T | T |
| 0.2170599999999965 | 0.9446500000000029 | 0.5156599999999969 | T | T | T |
| 0.3768400000000014 | 0.9386200000000002 | 0.5119800000000012 | T | T | T |
| 0.4343199999999996 | 0.9703900000000019 | 0.3001700000000014 | T | T | T |
| 0.3208899999999986 | 0.9371300000000033 | 0.1641699999999986 | T | T | T |
| 0.0822900000000004 | 0.1741200000000021 | 0.1653400000000005 | T | T | T |
| 0.1985099999999989 | 0.1296099999999996 | 0.2998100000000008 | T | T | T |
| 0.2313299999999998 | 0.1712399999999974 | 0.5180999999999969 | T | T | T |
| 0.3872199999999992 | 0.1754999999999995 | 0.5090000000000003 | T | T | T |
| 0.4358599999999981 | 0.1293799999999976 | 0.2947500000000005 | T | T | T |
| 0.3193600000000032 | 0.1732299999999967 | 0.1644199999999998 | T | T | T |
| 0.5755499999999998 | 0.5568799999999996 | 0.3524499999999975 | T | T | T |
| 0.6900699999999986 | 0.5281499999999966 | 0.1999899999999997 | T | T | T |
| 0.7111900000000020 | 0.5713599999999985 | 0.9836200000000019 | T | T | T |
| 0.8678700000000035 | 0.5753399999999971 | 0.9864000000000033 | T | T | T |
| 0.8098799999999997 | 0.5512000000000015 | 0.3489599999999982 | T | T | T |
| 0.5728500000000025 | 0.3320900000000009 | 0.3351400000000027 | T | T | T |
| 0.6963000000000008 | 0.3738600000000005 | 0.1974799999999988 | T | T | T |
| 0.7294800000000023 | 0.3271299999999968 | 0.9856600000000029 | T | T | T |
| 0.8843200000000024 | 0.3269200000000012 | 0.9968700000000013 | T | T | T |
| 0.9422199999999989 | 0.3777699999999982 | 0.1882000000000019 | T | T | T |
| 0.9176500000000019 | 0.4469199999999987 | 0.8644200000000026 | T | T | T |
| 0.7964500000000001 | 0.4722399999999993 | 0.7256000000000000 | T | T | T |
| 0.7751799999999989 | 0.4371500000000026 | 0.4994399999999999 | T | T | T |
| 0.6180200000000013 | 0.4323600000000027 | 0.4917900000000017 | T | T | T |
| 0.5664000000000016 | 0.4711100000000030 | 0.7059599999999975 | T | T | T |
| 0.6711499999999972 | 0.4470499999999973 | 0.8621199999999973 | T | T | T |
| 0.9197800000000029 | 0.6794799999999981 | 0.8338099999999997 | T | T | T |
| 0.7701500000000010 | 0.6707499999999982 | 0.4673099999999977 | T | T | T |
| 0.6142200000000031 | 0.6736599999999981 | 0.4843199999999968 | T | T | T |
| 0.5582599999999971 | 0.6301600000000036 | 0.6976299999999966 | T | T | T |
| 0.6678199999999990 | 0.6778499999999994 | 0.8287400000000034 | T | T | T |
| 0.5786999999999978 | 0.9466499999999982 | 0.3592900000000014 | T | T | T |
| 0.7001800000000031 | 0.9755800000000008 | 0.2188900000000018 | T | T | T |
| 0.7199799999999996 | 0.9394199999999984 | 0.9949299999999965 | T | T | T |
| 0.8803199999999975 | 0.9353699999999989 | 0.9964599999999990 | T | T | T |
| 0.9325699999999983 | 0.9708100000000002 | 0.2061700000000002 | T | T | T |
| 0.8249500000000012 | 0.9480599999999981 | 0.3583799999999968 | T | T | T |

**Structure files (CONTCAR) involved in this work:**

|                    |                    |                    |   |   |   |
|--------------------|--------------------|--------------------|---|---|---|
| 0.5790500000000023 | 0.1765499999999989 | 0.3309399999999982 | T | T | T |
| 0.6993900000000011 | 0.1346500000000006 | 0.1964899999999972 | T | T | T |
| 0.7323200000000014 | 0.1716300000000004 | 0.9735700000000023 | T | T | T |
| 0.8870099999999965 | 0.1744199999999978 | 0.9843899999999977 | T | T | T |
| 0.9369700000000023 | 0.1289700000000025 | 0.1981299999999990 | T | T | T |
| 0.8228999999999971 | 0.1770899999999997 | 0.3320900000000009 | T | T | T |
| 0.9231399999999965 | 0.0557200000000009 | 0.8572399999999973 | T | T | T |
| 0.8023700000000034 | 0.0279400000000010 | 0.7090900000000033 | T | T | T |
| 0.7825199999999981 | 0.0693500000000000 | 0.4919900000000013 | T | T | T |
| 0.6223200000000020 | 0.0714899999999972 | 0.4900999999999982 | T | T | T |
| 0.5689800000000034 | 0.0332599999999985 | 0.6985400000000013 | T | T | T |
| 0.6791800000000023 | 0.0549699999999973 | 0.8492499999999978 | T | T | T |
| 0.9244399999999970 | 0.8325400000000016 | 0.8379699999999985 | T | T | T |
| 0.8017899999999969 | 0.8712099999999978 | 0.6993700000000018 | T | T | T |
| 0.7707899999999981 | 0.8278699999999972 | 0.4819600000000008 | T | T | T |
| 0.6157100000000000 | 0.8280000000000030 | 0.4908399999999986 | T | T | T |
| 0.5638999999999967 | 0.8761999999999972 | 0.6974900000000019 | T | T | T |
| 0.6768399999999986 | 0.8359299999999976 | 0.8364300000000000 | T | T | T |
| 0.4221100000000035 | 0.4444599999999994 | 0.6390200000000021 | T | T | T |
| 0.3025999999999982 | 0.4713199999999986 | 0.7800999999999974 | T | T | T |
| 0.2808100000000024 | 0.4441199999999981 | 0.0052999999999983 | T | T | T |
| 0.1223799999999997 | 0.4383399999999966 | 0.0111899999999991 | T | T | T |
| 0.0626400000000018 | 0.4706199999999967 | 0.8009600000000034 | T | T | T |
| 0.1733699999999985 | 0.4400899999999979 | 0.6553699999999978 | T | T | T |
| 0.4140099999999975 | 0.6759800000000027 | 0.6571399999999983 | T | T | T |
| 0.2991799999999998 | 0.6296899999999965 | 0.7931000000000026 | T | T | T |
| 0.2686199999999985 | 0.6716899999999981 | 0.0131999999999977 | T | T | T |
| 0.1139200000000002 | 0.6738500000000016 | 0.0028900000000007 | T | T | T |
| 0.0622299999999996 | 0.6297399999999982 | 0.7924999999999969 | T | T | T |
| 0.1764999999999972 | 0.6710500000000010 | 0.6590100000000021 | T | T | T |
| 0.0712100000000007 | 0.5612300000000019 | 0.1438899999999990 | T | T | T |
| 0.1936099999999996 | 0.5311400000000006 | 0.2793899999999994 | T | T | T |
| 0.2137099999999990 | 0.5575600000000023 | 0.5102800000000016 | T | T | T |
| 0.3719499999999982 | 0.5664900000000017 | 0.5096199999999982 | T | T | T |
| 0.4256200000000021 | 0.5295600000000036 | 0.2999500000000026 | T | T | T |
| 0.3215300000000028 | 0.5623599999999982 | 0.1493899999999968 | T | T | T |
| 0.0859999999999985 | 0.3267499999999970 | 0.1588700000000003 | T | T | T |
| 0.1978900000000010 | 0.3729999999999976 | 0.2963600000000000 | T | T | T |
| 0.2294600000000031 | 0.3324799999999968 | 0.5165300000000030 | T | T | T |
| 0.3847999999999985 | 0.3288099999999972 | 0.5038100000000014 | T | T | T |
| 0.4299699999999973 | 0.3726699999999994 | 0.2904499999999999 | T | T | T |
| 0.3169699999999978 | 0.3304899999999975 | 0.1585400000000021 | T | T | T |
| 0.9220699999999979 | 0.5323599999999971 | 0.1896899999999988 | T | T | T |
| 0.8262599999999978 | 0.3397900000000007 | 0.3303999999999974 | T | T | T |
| 0.7954999999999970 | 0.6376899999999992 | 0.7027599999999978 | T | T | T |
| 0.0039000000000016 | 0.5585999999999984 | 0.2080300000000008 | T | T | T |
| 0.3595299999999995 | 0.0706899999999990 | 0.7214900000000029 | T | T | T |
| 0.3164799999999985 | 0.0532899999999970 | 0.9054300000000026 | T | T | T |
| 0.2028200000000027 | 0.0493700000000032 | 0.0079100000000025 | T | T | T |
| 0.0933500000000009 | 0.0705400000000012 | 0.9003900000000016 | T | T | T |
| 0.1031800000000018 | 0.0661699999999996 | 0.7035100000000014 | T | T | T |
| 0.2296400000000034 | 0.0531700000000015 | 0.7576800000000006 | T | T | T |
| 0.3607700000000023 | 0.8285800000000023 | 0.7506600000000034 | T | T | T |

**Structure files (CONTCAR) involved in this work:**

|                    |                    |                    |   |   |   |
|--------------------|--------------------|--------------------|---|---|---|
| 0.3031500000000023 | 0.8630500000000012 | 0.9193599999999975 | T | T | T |
| 0.1897200000000012 | 0.8544899999999984 | 0.0188699999999997 | T | T | T |
| 0.0885699999999972 | 0.8337300000000027 | 0.8947700000000012 | T | T | T |
| 0.1034399999999991 | 0.8428600000000017 | 0.6986500000000007 | T | T | T |
| 0.2294199999999975 | 0.8484499999999997 | 0.7566399999999973 | T | T | T |
| 0.3144399999999976 | 0.9515200000000021 | 0.7724600000000024 | T | T | T |
| 0.0894199999999969 | 0.9533399999999972 | 0.8078399999999988 | T | T | T |
| 0.4328599999999980 | 0.1297500000000014 | 0.5823099999999997 | T | T | T |
| 0.4135599999999968 | 0.9987199999999987 | 0.5722099999999983 | T | T | T |
| 0.3913099999999972 | 0.8673599999999979 | 0.5662499999999966 | T | T | T |
| 0.1953400000000016 | 0.1385900000000007 | 0.6148600000000002 | T | T | T |
| 0.1877599999999973 | 0.0059200000000033 | 0.5819600000000023 | T | T | T |
| 0.1982900000000001 | 0.8725299999999976 | 0.5652400000000029 | T | T | T |
| 0.9878900000000002 | 0.0399099999999990 | 0.7881900000000002 | T | T | T |
| 0.9860499999999988 | 0.8710099999999983 | 0.7817700000000016 | T | T | T |
| 0.1417100000000033 | 0.9320000000000022 | 0.2200100000000020 | T | T | T |
| 0.1836100000000016 | 0.9485099999999989 | 0.4053800000000010 | T | T | T |
| 0.2973399999999984 | 0.9530900000000031 | 0.5076200000000028 | T | T | T |
| 0.4071899999999999 | 0.9338699999999989 | 0.4004800000000017 | T | T | T |
| 0.3974400000000031 | 0.9373500000000021 | 0.2039299999999997 | T | T | T |
| 0.2710200000000000 | 0.9503100000000018 | 0.2583899999999986 | T | T | T |
| 0.1407400000000010 | 0.1750899999999973 | 0.2492999999999981 | T | T | T |
| 0.1957000000000022 | 0.1408500000000004 | 0.4192899999999966 | T | T | T |
| 0.3098900000000029 | 0.1505999999999972 | 0.5163500000000028 | T | T | T |
| 0.4129399999999990 | 0.1692499999999981 | 0.3948200000000028 | T | T | T |
| 0.3965600000000009 | 0.1612500000000026 | 0.1989900000000020 | T | T | T |
| 0.2715400000000017 | 0.1519899999999978 | 0.2580400000000012 | T | T | T |
| 0.1845199999999991 | 0.0510799999999989 | 0.2741400000000027 | T | T | T |
| 0.4173100000000005 | 0.0503000000000000 | 0.3059599999999989 | T | T | T |
| 0.0664099999999976 | 0.8729000000000013 | 0.0829200000000014 | T | T | T |
| 0.0863299999999967 | 0.0036899999999989 | 0.0708800000000025 | T | T | T |
| 0.1088099999999983 | 0.1351599999999991 | 0.0667899999999975 | T | T | T |
| 0.3052800000000033 | 0.8640400000000028 | 0.1156900000000007 | T | T | T |
| 0.3123799999999974 | 0.9958900000000028 | 0.0815600000000032 | T | T | T |
| 0.3024600000000035 | 0.1289400000000001 | 0.0658799999999999 | T | T | T |
| 0.5139599999999973 | 0.9575999999999993 | 0.2881199999999993 | T | T | T |
| 0.5159700000000029 | 0.1379400000000004 | 0.2791100000000029 | T | T | T |
| 0.6313099999999991 | 0.5619000000000014 | 0.2656899999999993 | T | T | T |
| 0.7027399999999986 | 0.5758799999999979 | 0.1041299999999978 | T | T | T |
| 0.7895400000000024 | 0.5668900000000008 | 0.9509499999999989 | T | T | T |
| 0.8742400000000004 | 0.5776899999999969 | 0.1057699999999997 | T | T | T |
| 0.8849700000000027 | 0.5279700000000034 | 0.3159899999999993 | T | T | T |
| 0.7573700000000017 | 0.5266099999999980 | 0.2679100000000005 | T | T | T |
| 0.6404899999999998 | 0.3415499999999980 | 0.2717000000000027 | T | T | T |
| 0.6931999999999974 | 0.3309799999999967 | 0.0936999999999983 | T | T | T |
| 0.8068999999999988 | 0.3523300000000020 | 0.9945999999999984 | T | T | T |
| 0.9113699999999980 | 0.3215599999999981 | 0.1119500000000002 | T | T | T |
| 0.9106499999999969 | 0.3673500000000018 | 0.3020300000000020 | T | T | T |
| 0.7691999999999979 | 0.3718999999999966 | 0.2465199999999967 | T | T | T |
| 0.6732099999999974 | 0.4511099999999999 | 0.1707099999999997 | T | T | T |
| 0.9239299999999986 | 0.4504400000000004 | 0.1478999999999999 | T | T | T |
| 0.5696099999999973 | 0.6293300000000031 | 0.4075199999999981 | T | T | T |
| 0.5951200000000014 | 0.5013099999999966 | 0.4367700000000028 | T | T | T |

**Structure files (CONTCAR) involved in this work:**

|                    |                    |                    |   |   |   |
|--------------------|--------------------|--------------------|---|---|---|
| 0.5798599999999965 | 0.3681899999999985 | 0.4442900000000023 | T | T | T |
| 0.8055900000000022 | 0.6312399999999982 | 0.3736400000000017 | T | T | T |
| 0.7936899999999980 | 0.5160300000000007 | 0.4609000000000023 | T | T | T |
| 0.8272800000000018 | 0.3899199999999965 | 0.4408799999999999 | T | T | T |
| 0.0223299999999966 | 0.3672200000000032 | 0.2030400000000014 | T | T | T |
| 0.8533299999999997 | 0.4349399999999974 | 0.7910400000000024 | T | T | T |
| 0.7895800000000008 | 0.4343700000000013 | 0.6180700000000030 | T | T | T |
| 0.6981699999999975 | 0.4222499999999982 | 0.4735799999999983 | T | T | T |
| 0.6024799999999999 | 0.4357499999999987 | 0.6101699999999965 | T | T | T |
| 0.5984300000000005 | 0.4420799999999971 | 0.8088199999999972 | T | T | T |
| 0.7244299999999981 | 0.4714299999999980 | 0.7776199999999989 | T | T | T |
| 0.8581500000000020 | 0.6818099999999987 | 0.7579199999999986 | T | T | T |
| 0.8114500000000007 | 0.6461499999999987 | 0.5684600000000017 | T | T | T |
| 0.6923499999999976 | 0.6485800000000026 | 0.4796800000000019 | T | T | T |
| 0.5857200000000020 | 0.6654499999999999 | 0.5962600000000009 | T | T | T |
| 0.5898400000000024 | 0.6688199999999966 | 0.7936600000000027 | T | T | T |
| 0.7153100000000023 | 0.6505500000000026 | 0.7401300000000006 | T | T | T |
| 0.8193899999999985 | 0.5500600000000020 | 0.7018500000000003 | T | T | T |
| 0.5792500000000018 | 0.5513899999999978 | 0.6979699999999980 | T | T | T |
| 0.9288700000000034 | 0.3794200000000032 | 0.9310499999999990 | T | T | T |
| 0.9082500000000024 | 0.5122000000000000 | 0.9347100000000026 | T | T | T |
| 0.8994799999999969 | 0.6437299999999979 | 0.9388300000000029 | T | T | T |
| 0.6905799999999971 | 0.3738200000000020 | 0.9050500000000028 | T | T | T |
| 0.6711600000000004 | 0.5037299999999973 | 0.9490199999999973 | T | T | T |
| 0.6780800000000013 | 0.6374199999999988 | 0.9335599999999999 | T | T | T |
| 0.4872900000000016 | 0.4534299999999973 | 0.7094600000000000 | T | T | T |
| 0.4773199999999989 | 0.6352499999999992 | 0.7027500000000018 | T | T | T |
| 0.6445200000000000 | 0.9406999999999996 | 0.2897099999999995 | T | T | T |
| 0.7002600000000001 | 0.9372400000000027 | 0.1121300000000005 | T | T | T |
| 0.8004400000000018 | 0.9434699999999978 | 0.9794699999999992 | T | T | T |
| 0.8980999999999995 | 0.9299499999999981 | 0.1143199999999993 | T | T | T |
| 0.8997499999999974 | 0.9482199999999992 | 0.3118300000000005 | T | T | T |
| 0.7731899999999996 | 0.9666899999999998 | 0.2692899999999980 | T | T | T |
| 0.6415199999999999 | 0.1764700000000019 | 0.2541900000000012 | T | T | T |
| 0.6968099999999993 | 0.1564800000000020 | 0.0799999999999983 | T | T | T |
| 0.8100999999999985 | 0.1477399999999989 | 0.9796600000000026 | T | T | T |
| 0.9141699999999986 | 0.1686400000000035 | 0.0979000000000028 | T | T | T |
| 0.8986799999999988 | 0.1580099999999973 | 0.2956399999999988 | T | T | T |
| 0.7721200000000010 | 0.1510900000000035 | 0.2438199999999995 | T | T | T |
| 0.6831299999999985 | 0.0547899999999970 | 0.2060499999999976 | T | T | T |
| 0.9199600000000032 | 0.0499099999999970 | 0.1845599999999976 | T | T | T |
| 0.5701099999999997 | 0.8770299999999978 | 0.4220899999999972 | T | T | T |
| 0.5836600000000018 | 0.0088000000000008 | 0.4378099999999989 | T | T | T |
| 0.6000000000000014 | 0.1409299999999973 | 0.4358199999999997 | T | T | T |
| 0.8115400000000008 | 0.8733199999999997 | 0.4028199999999984 | T | T | T |
| 0.8196200000000005 | 0.0031299999999987 | 0.4472400000000007 | T | T | T |
| 0.8066400000000016 | 0.1369200000000035 | 0.4357100000000003 | T | T | T |
| 0.0116399999999999 | 0.9540999999999968 | 0.2157100000000014 | T | T | T |
| 0.0170499999999976 | 0.1382699999999986 | 0.2136599999999973 | T | T | T |
| 0.8577799999999982 | 0.0560600000000022 | 0.7862900000000010 | T | T | T |
| 0.8023700000000034 | 0.0747500000000016 | 0.6096199999999996 | T | T | T |
| 0.7021799999999985 | 0.0597599999999971 | 0.4787400000000019 | T | T | T |
| 0.6012500000000003 | 0.0766100000000023 | 0.6071600000000004 | T | T | T |

**Structure files (CONTCAR) involved in this work:**

|                    |                    |                    |   |   |   |
|--------------------|--------------------|--------------------|---|---|---|
| 0.6039600000000007 | 0.0522100000000023 | 0.8042599999999993 | T | T | T |
| 0.7292800000000028 | 0.0308500000000009 | 0.7609199999999987 | T | T | T |
| 0.8589399999999969 | 0.8376900000000020 | 0.7678599999999989 | T | T | T |
| 0.8024300000000011 | 0.8318399999999997 | 0.5931700000000006 | T | T | T |
| 0.6933099999999968 | 0.8524600000000007 | 0.4845899999999972 | T | T | T |
| 0.5909100000000009 | 0.8294500000000014 | 0.6062299999999965 | T | T | T |
| 0.6013200000000012 | 0.8545999999999978 | 0.8002600000000015 | T | T | T |
| 0.7290199999999984 | 0.8629099999999994 | 0.7517500000000013 | T | T | T |
| 0.8178800000000024 | 0.9501599999999968 | 0.6797100000000000 | T | T | T |
| 0.5796100000000024 | 0.9542399999999986 | 0.6713299999999975 | T | T | T |
| 0.9320900000000023 | 0.1292199999999966 | 0.9089299999999980 | T | T | T |
| 0.9172099999999972 | 0.9999499999999983 | 0.9459500000000034 | T | T | T |
| 0.9080099999999973 | 0.8670100000000005 | 0.9452100000000030 | T | T | T |
| 0.6949899999999971 | 0.1312199999999990 | 0.8844300000000018 | T | T | T |
| 0.6856900000000010 | 0.0054999999999978 | 0.9452700000000007 | T | T | T |
| 0.6916300000000035 | 0.8715400000000031 | 0.9431799999999981 | T | T | T |
| 0.4902099999999976 | 0.0499300000000034 | 0.7134700000000009 | T | T | T |
| 0.4840299999999971 | 0.8656700000000015 | 0.7114100000000008 | T | T | T |
| 0.3560900000000018 | 0.4338300000000004 | 0.7079999999999984 | T | T | T |
| 0.3096499999999978 | 0.4410900000000026 | 0.8920200000000023 | T | T | T |
| 0.2009400000000028 | 0.4587900000000005 | 0.0051500000000004 | T | T | T |
| 0.0914000000000001 | 0.4335700000000031 | 0.8994100000000032 | T | T | T |
| 0.0977900000000034 | 0.4389899999999969 | 0.7011299999999991 | T | T | T |
| 0.2262399999999971 | 0.4586600000000018 | 0.7430200000000013 | T | T | T |
| 0.3536199999999994 | 0.6767499999999984 | 0.7378000000000000 | T | T | T |
| 0.3028899999999979 | 0.6458700000000022 | 0.9108000000000018 | T | T | T |
| 0.1908900000000031 | 0.6482499999999973 | 0.0132400000000032 | T | T | T |
| 0.0910099999999971 | 0.6721300000000028 | 0.8865899999999982 | T | T | T |
| 0.0990600000000015 | 0.6573199999999986 | 0.6914200000000008 | T | T | T |
| 0.2247300000000010 | 0.6453199999999981 | 0.7496999999999971 | T | T | T |
| 0.3183900000000008 | 0.5513300000000001 | 0.7752699999999990 | T | T | T |
| 0.0793600000000012 | 0.5503700000000009 | 0.8068499999999972 | T | T | T |
| 0.4322099999999978 | 0.3786599999999964 | 0.5685300000000026 | T | T | T |
| 0.4162800000000004 | 0.5103200000000001 | 0.5673999999999992 | T | T | T |
| 0.3873499999999979 | 0.6404399999999981 | 0.5550799999999967 | T | T | T |
| 0.1904400000000024 | 0.3661799999999999 | 0.6105599999999995 | T | T | T |
| 0.1751300000000029 | 0.4965199999999967 | 0.5671299999999988 | T | T | T |
| 0.1921000000000035 | 0.6297199999999989 | 0.5567399999999978 | T | T | T |
| 0.9823400000000007 | 0.4576899999999995 | 0.7905299999999968 | T | T | T |
| 0.9821200000000019 | 0.6388000000000034 | 0.7806500000000014 | T | T | T |
| 0.1363500000000002 | 0.5705900000000028 | 0.2173700000000025 | T | T | T |
| 0.1908000000000030 | 0.5568200000000019 | 0.3944299999999998 | T | T | T |
| 0.2936100000000010 | 0.5464500000000001 | 0.5222800000000021 | T | T | T |
| 0.3917900000000003 | 0.5692700000000031 | 0.3928000000000011 | T | T | T |
| 0.3961400000000026 | 0.5607100000000003 | 0.1968900000000033 | T | T | T |
| 0.2678099999999972 | 0.5458300000000023 | 0.2370799999999988 | T | T | T |
| 0.1428300000000036 | 0.3246400000000023 | 0.2452800000000011 | T | T | T |
| 0.1949600000000018 | 0.3615500000000011 | 0.4157999999999973 | T | T | T |
| 0.3077699999999979 | 0.3540599999999969 | 0.5166400000000024 | T | T | T |
| 0.4059099999999987 | 0.3290199999999999 | 0.3867499999999993 | T | T | T |
| 0.3944800000000015 | 0.3442300000000031 | 0.1894500000000008 | T | T | T |
| 0.2715400000000017 | 0.3542699999999996 | 0.2537299999999973 | T | T | T |
| 0.1787899999999993 | 0.4507600000000025 | 0.2720600000000033 | T | T | T |

**Structure files (CONTCAR) involved in this work:**

|                    |                    |                    |   |   |   |
|--------------------|--------------------|--------------------|---|---|---|
| 0.4075399999999973 | 0.4501800000000031 | 0.3090499999999992 | T | T | T |
| 0.0667499999999990 | 0.6253299999999982 | 0.0684899999999971 | T | T | T |
| 0.0820599999999985 | 0.4934399999999997 | 0.0764100000000028 | T | T | T |
| 0.1151499999999999 | 0.3638300000000001 | 0.0598600000000005 | T | T | T |
| 0.3077400000000026 | 0.6371400000000023 | 0.1059899999999985 | T | T | T |
| 0.3175799999999995 | 0.5059800000000010 | 0.0619500000000031 | T | T | T |
| 0.2968400000000031 | 0.3727099999999979 | 0.0591799999999978 | T | T | T |
| 0.5056700000000021 | 0.5385599999999968 | 0.2994399999999970 | T | T | T |
| 0.5102600000000024 | 0.3662199999999984 | 0.2756200000000035 | T | T | T |
| 0.4358199999999997 | 0.7525899999999979 | 0.6326099999999997 | T | T | T |
| 0.1890000000000001 | 0.7499200000000030 | 0.6355399999999989 | T | T | T |
| 0.2754199999999969 | 0.7520999999999987 | 0.0227300000000028 | T | T | T |
| 0.1077700000000021 | 0.7501200000000026 | 0.0445199999999986 | T | T | T |
| 0.0650100000000009 | 0.2504500000000007 | 0.1311999999999998 | T | T | T |
| 0.3063700000000011 | 0.2513300000000029 | 0.1349599999999995 | T | T | T |
| 0.2219100000000012 | 0.2518900000000031 | 0.5230099999999993 | T | T | T |
| 0.3931200000000032 | 0.2529400000000024 | 0.5458599999999976 | T | T | T |
| 0.5576999999999970 | 0.2533600000000007 | 0.3554400000000015 | T | T | T |
| 0.8171600000000012 | 0.2558399999999992 | 0.3519300000000030 | T | T | T |
| 0.7269300000000030 | 0.2505600000000001 | 0.9449400000000026 | T | T | T |
| 0.8910399999999967 | 0.2523600000000030 | 0.9481200000000030 | T | T | T |
| 0.9454800000000034 | 0.7553199999999975 | 0.8588000000000022 | T | T | T |
| 0.6837500000000034 | 0.7560599999999980 | 0.8525899999999993 | T | T | T |
| 0.7768900000000016 | 0.7499600000000015 | 0.4460199999999972 | T | T | T |
| 0.6095899999999972 | 0.7515300000000025 | 0.4496299999999991 | T | T | T |
| 0.9221399999999988 | 0.4886800000000022 | 0.5384999999999991 | T | T | T |
| 0.9245200000000011 | 0.4444799999999987 | 0.4023200000000031 | T | T | T |
| 0.8619600000000034 | 0.5594499999999982 | 0.5664299999999969 | T | T | T |
| 0.0528300000000002 | 0.4553700000000021 | 0.4648400000000024 | T | T | T |
| 0.0389699999999991 | 0.4751699999999985 | 0.3310999999999993 | T | T | T |
| 0.9498400000000018 | 0.4716700000000031 | 0.5929100000000034 | T | T | T |
| 0.0244199999999992 | 0.5722000000000023 | 0.5137000000000000 | T | T | T |
| 0.9863799999999969 | 0.5874400000000009 | 0.3933200000000028 | T | T | T |
| 0.0725100000000012 | 0.5868899999999968 | 0.4037799999999976 | T | T | T |
| 0.0308500000000009 | 0.4892400000000023 | 0.4093700000000027 | T | T | T |
| 0.0271100000000004 | 0.5617500000000035 | 0.4333699999999965 | T | T | T |

**Figure 4(a) Route(a)-Zn ③**

Si Al O Zn H C

1.0000000000000000

20.0219999999999985 0.0000000000000000 0.0000000000000000

0.0000000000000000 19.8990000000000009 0.0000000000000000

0.0000000000000000 0.0000000000000000 13.3829999999999991

93 3 193 2 6 2

Selective dynamics

Direct

|                    |                    |                    |   |   |   |
|--------------------|--------------------|--------------------|---|---|---|
| 0.4234921859848466 | 0.0602981839036079 | 0.6485172903366696 | T | T | T |
| 0.3060798779652079 | 0.0322656607266418 | 0.7921932062470202 | T | T | T |
| 0.2831071599476155 | 0.0569562734471078 | 0.0170174721485705 | T | T | T |
| 0.1238715138934038 | 0.0624930025179708 | 0.0125436560210737 | T | T | T |
| 0.0688368204333313 | 0.0310170518721779 | 0.8010776005164129 | T | T | T |
| 0.1810606754991912 | 0.0646481660260797 | 0.6650569256669284 | T | T | T |
| 0.4192555017014392 | 0.8277039270679964 | 0.6677625269485215 | T | T | T |



**Structure files (CONTCAR) involved in this work:**

|                    |                    |                    |   |   |   |
|--------------------|--------------------|--------------------|---|---|---|
| 0.3018556604116298 | 0.8732798045965211 | 0.8005217753256693 | T | T | T |
| 0.2675521260110590 | 0.8318198214318339 | 0.0196800197000107 | T | T | T |
| 0.1124721339138482 | 0.8273468510779657 | 0.0111478557470488 | T | T | T |
| 0.0667747913745699 | 0.8745513334790305 | 0.7972449458043636 | T | T | T |
| 0.1804352791766428 | 0.8288080926948261 | 0.6649096957800152 | T | T | T |
| 0.0765640966711373 | 0.9405044425312041 | 0.1490804501855189 | T | T | T |
| 0.1953131481420718 | 0.9700296057106979 | 0.2906029122168757 | T | T | T |
| 0.2174222791071470 | 0.9435958871474721 | 0.5162094985091150 | T | T | T |
| 0.3776993589143149 | 0.9360671809841291 | 0.5134148985471058 | T | T | T |
| 0.4343237925153521 | 0.9693323583502897 | 0.3011574703670380 | T | T | T |
| 0.3210496394538114 | 0.9364623867305183 | 0.1646014537911910 | T | T | T |
| 0.0829672258643558 | 0.1727257917156490 | 0.1661282987424084 | T | T | T |
| 0.1983470348355530 | 0.1286026691729156 | 0.3017710197133914 | T | T | T |
| 0.2325292192635423 | 0.1692825040121173 | 0.5192455792497529 | T | T | T |
| 0.3879906125315742 | 0.1737111828159580 | 0.5086295071122179 | T | T | T |
| 0.4356559837593463 | 0.1279526861496817 | 0.2943874841140942 | T | T | T |
| 0.3186092909304815 | 0.1728889208180927 | 0.1662772002801338 | T | T | T |
| 0.5782143536463128 | 0.5558992319407871 | 0.3561304354999935 | T | T | T |
| 0.6929756699942320 | 0.5262126387341904 | 0.2043812464207132 | T | T | T |
| 0.7170101310937221 | 0.5689258910377401 | 0.9876535508409084 | T | T | T |
| 0.8755659397305668 | 0.5741605627270100 | 0.9852433784890967 | T | T | T |
| 0.8125929473581158 | 0.5512049739908663 | 0.3474299552322295 | T | T | T |
| 0.5750927596198675 | 0.3292989914434112 | 0.3334984231685579 | T | T | T |
| 0.6950152971634770 | 0.3727493853677054 | 0.1927894229049090 | T | T | T |
| 0.7324985288426620 | 0.3274989974727262 | 0.9808742743583695 | T | T | T |
| 0.8875133007687123 | 0.3251937214132837 | 0.9939293110408510 | T | T | T |
| 0.9437132566858448 | 0.3728229521048060 | 0.1919680021688084 | T | T | T |
| 0.9205418483078855 | 0.4454176868281364 | 0.8616801344399885 | T | T | T |
| 0.8012563299282807 | 0.4729430558428644 | 0.7204651501280069 | T | T | T |
| 0.7779802398456950 | 0.4357153862825196 | 0.4969819571782727 | T | T | T |
| 0.6194809449313285 | 0.4300176742426293 | 0.4921994658716283 | T | T | T |
| 0.5694971861199443 | 0.4689173998868743 | 0.7058691300271384 | T | T | T |
| 0.6780357460673320 | 0.4479391116643721 | 0.8577911569885420 | T | T | T |
| 0.9218726857845083 | 0.6790301154867012 | 0.8283269512203266 | T | T | T |
| 0.7684318760407566 | 0.6693769410887617 | 0.4672384585202788 | T | T | T |
| 0.6134205646643670 | 0.6733027358223285 | 0.4894318103859340 | T | T | T |
| 0.5603616202284134 | 0.6277891874036796 | 0.7008637067512616 | T | T | T |
| 0.6735019717125974 | 0.6738757216431368 | 0.8289520987441847 | T | T | T |
| 0.5786464406504778 | 0.9451178466809609 | 0.3587129510900687 | T | T | T |
| 0.6989095945199590 | 0.9736468808685348 | 0.2155736935212794 | T | T | T |
| 0.7201936560968080 | 0.9374953577544413 | 0.9936541771616404 | T | T | T |
| 0.8803080280305150 | 0.9338528699302105 | 0.9952199788214551 | T | T | T |
| 0.9317279604897596 | 0.9705140295794776 | 0.2053479082567004 | T | T | T |
| 0.8228483354841963 | 0.9468510926889380 | 0.3560963345993284 | T | T | T |
| 0.5787669986107612 | 0.1740131304889888 | 0.3300492572006583 | T | T | T |
| 0.6986753265381658 | 0.1312842911578770 | 0.1942928771722083 | T | T | T |
| 0.7330011369025882 | 0.1714900586261349 | 0.9728613338224146 | T | T | T |
| 0.8875731368853732 | 0.1731771531814165 | 0.9825868980307124 | T | T | T |
| 0.9363239282522817 | 0.1288196829810314 | 0.1969550971714509 | T | T | T |
| 0.8208999855545333 | 0.1731511284065523 | 0.3304133795595899 | T | T | T |
| 0.9238902673322924 | 0.0539438344569979 | 0.8562222530600798 | T | T | T |
| 0.8023034308387976 | 0.0267724967382830 | 0.7097810106209663 | T | T | T |
| 0.7820190553147518 | 0.0668140623291446 | 0.4922708266901165 | T | T | T |

**Structure files (CONTCAR) involved in this work:**

|                    |                    |                    |   |   |   |
|--------------------|--------------------|--------------------|---|---|---|
| 0.6216331653073747 | 0.0698181948903691 | 0.4905691502984474 | T | T | T |
| 0.5689549211723558 | 0.0321366458780950 | 0.6997252146002123 | T | T | T |
| 0.6790404659050177 | 0.0539217601897125 | 0.8505065348418550 | T | T | T |
| 0.9244760806808658 | 0.8316229243044411 | 0.8363319420503224 | T | T | T |
| 0.8025748205230313 | 0.8697020622802992 | 0.6963004168845864 | T | T | T |
| 0.7696435691071652 | 0.8268903305982410 | 0.4791705411736567 | T | T | T |
| 0.6147717544761490 | 0.8269923592178948 | 0.4906200400552005 | T | T | T |
| 0.5639532292265650 | 0.8749699558923887 | 0.6986474654926921 | T | T | T |
| 0.6785519576105026 | 0.8328720402122017 | 0.8339091760762735 | T | T | T |
| 0.4255004681770221 | 0.4418320626610385 | 0.6457702394629790 | T | T | T |
| 0.3052729720276278 | 0.4701918709046759 | 0.7869309495985575 | T | T | T |
| 0.2823181395309304 | 0.4452503992990503 | 0.0124738232252420 | T | T | T |
| 0.1238675219886976 | 0.4387472997396680 | 0.0167307973802816 | T | T | T |
| 0.0647662130710064 | 0.4694423557841563 | 0.8028051982365687 | T | T | T |
| 0.1773283494746860 | 0.4363890015257858 | 0.6622910476435971 | T | T | T |
| 0.4166764118315523 | 0.6741495228522496 | 0.6656852882910940 | T | T | T |
| 0.3016475020482108 | 0.6291850434191744 | 0.8016125190732236 | T | T | T |
| 0.2685324375315782 | 0.6703583977766565 | 0.0192851688449509 | T | T | T |
| 0.1136555695214777 | 0.6729788594051584 | 0.0084999132633955 | T | T | T |
| 0.0636657350374479 | 0.6285319862539871 | 0.7938227372247750 | T | T | T |
| 0.1813958281366840 | 0.6718042250971242 | 0.6663907913714612 | T | T | T |
| 0.0799394744871032 | 0.5610989136005951 | 0.1522265701481638 | T | T | T |
| 0.1982461229803820 | 0.5291299639924796 | 0.2909757462314758 | T | T | T |
| 0.2195112037725842 | 0.5551299371460142 | 0.5204404354616757 | T | T | T |
| 0.3774327805682819 | 0.5639666663315169 | 0.5160625934641370 | T | T | T |
| 0.4302272411857657 | 0.5306035319297275 | 0.3029464880018808 | T | T | T |
| 0.3231739443417962 | 0.5632828298761345 | 0.1574946729222526 | T | T | T |
| 0.0875884313683925 | 0.3251703954114915 | 0.1629965599585304 | T | T | T |
| 0.1995473945497525 | 0.3715291526283669 | 0.3014137260288031 | T | T | T |
| 0.2314796179327320 | 0.3306063585392103 | 0.5196623565404632 | T | T | T |
| 0.3865244592987196 | 0.3277292439972815 | 0.5069481596879868 | T | T | T |
| 0.4325520739027369 | 0.3732079265031039 | 0.2931337336897146 | T | T | T |
| 0.3182460286465926 | 0.3302261990478099 | 0.1639228085043599 | T | T | T |
| 0.9213344338806303 | 0.5290760209586917 | 0.1954324107389808 | T | T | T |
| 0.8221907361179488 | 0.3348112689178568 | 0.3263125536932437 | T | T | T |
| 0.7997470426499507 | 0.6355641133775625 | 0.6956453940961731 | T | T | T |
| 0.0102247318791547 | 0.5559325120619032 | 0.2249136947397030 | T | T | T |
| 0.3598485358764220 | 0.0710018336825555 | 0.7221876330981933 | T | T | T |
| 0.3174558600808216 | 0.0547350917520024 | 0.9072545545562619 | T | T | T |
| 0.2031049008853745 | 0.0464571284893136 | 0.0073951906250957 | T | T | T |
| 0.0933325998052146 | 0.0696537866571851 | 0.9012539093132524 | T | T | T |
| 0.1043759016939490 | 0.0647942827019085 | 0.7042137170095862 | T | T | T |
| 0.2303810550030966 | 0.0520990409452887 | 0.7599708449417638 | T | T | T |
| 0.3600784224830464 | 0.8280275202951241 | 0.7506516727003917 | T | T | T |
| 0.3027361456188216 | 0.8609993802152152 | 0.9198362846812254 | T | T | T |
| 0.1892349659746144 | 0.8536049931857854 | 0.0199121150044237 | T | T | T |
| 0.0878705226227616 | 0.8322779420308423 | 0.8962889594661893 | T | T | T |
| 0.1034529408582964 | 0.8408191666496431 | 0.7006162961210964 | T | T | T |
| 0.2292532698537097 | 0.8514519843086533 | 0.7564584506729617 | T | T | T |
| 0.3167775032404760 | 0.9518205438509391 | 0.7766104101149620 | T | T | T |
| 0.0906922171037582 | 0.9522063830380241 | 0.8091198317419982 | T | T | T |
| 0.4337674371677307 | 0.1275010681648396 | 0.5811065301727888 | T | T | T |
| 0.4129265738378468 | 0.9964853306785978 | 0.5748755358428203 | T | T | T |

**Structure files (CONTCAR) involved in this work:**

|                    |                    |                    |   |   |   |
|--------------------|--------------------|--------------------|---|---|---|
| 0.3937090090941316 | 0.8646644013343975 | 0.5666221529383241 | T | T | T |
| 0.1970053556144034 | 0.1377946234886925 | 0.6172120697735589 | T | T | T |
| 0.1901009379485709 | 0.0054883682615390 | 0.5830362109418271 | T | T | T |
| 0.1959403966129703 | 0.8719383878481367 | 0.5647533690138755 | T | T | T |
| 0.9887822326593855 | 0.0385114534786360 | 0.7871143745201836 | T | T | T |
| 0.9862206129709304 | 0.8718041718223897 | 0.7829937932437373 | T | T | T |
| 0.1409246230291030 | 0.9312327178505625 | 0.2217068840390572 | T | T | T |
| 0.1839821666162758 | 0.9487345861652007 | 0.4061152742546612 | T | T | T |
| 0.2979096363198358 | 0.9489054865615044 | 0.5086136947878883 | T | T | T |
| 0.4081190154981892 | 0.9326809769491722 | 0.4018755557934769 | T | T | T |
| 0.3973027446757109 | 0.9359000143355145 | 0.2052700695460549 | T | T | T |
| 0.2706850305947118 | 0.9491459068553239 | 0.2583122517701405 | T | T | T |
| 0.1397858958001390 | 0.1736367226619316 | 0.2525888797718546 | T | T | T |
| 0.1957240516604555 | 0.1385160804294006 | 0.4215756089896888 | T | T | T |
| 0.3108829488961115 | 0.1480724543823195 | 0.5160461450613317 | T | T | T |
| 0.4134613923036157 | 0.1686998129099326 | 0.3941491645990379 | T | T | T |
| 0.3958956465528611 | 0.1593915990119991 | 0.1987369264194289 | T | T | T |
| 0.2711445407322408 | 0.1523647194566446 | 0.2606624648402593 | T | T | T |
| 0.1851055502421558 | 0.0503320032432555 | 0.2735972046390767 | T | T | T |
| 0.4164947540402667 | 0.0490775612445744 | 0.3070594010280421 | T | T | T |
| 0.0658230305614607 | 0.8717786546536288 | 0.0848933082365765 | T | T | T |
| 0.0863166952751677 | 0.0020893047932954 | 0.0710635454210306 | T | T | T |
| 0.1108045167567604 | 0.1331111657602281 | 0.0689208761789138 | T | T | T |
| 0.3052223276796188 | 0.8635152890672720 | 0.1156709089550445 | T | T | T |
| 0.3134252342563387 | 0.9959196080514930 | 0.0827122194475580 | T | T | T |
| 0.2996344441573098 | 0.1290708358108583 | 0.0680573178605737 | T | T | T |
| 0.5139201925341687 | 0.9572848370683210 | 0.2878554710826150 | T | T | T |
| 0.5156185225141141 | 0.1359770332021197 | 0.2772512787696627 | T | T | T |
| 0.6385887305810788 | 0.5621183421509824 | 0.2764487841266173 | T | T | T |
| 0.7041283204619535 | 0.5737557199402582 | 0.1073958308627359 | T | T | T |
| 0.7961662627285677 | 0.5634639720916842 | 0.9611856888000039 | T | T | T |
| 0.8902194451696553 | 0.5791907360939914 | 0.1027965838699435 | T | T | T |
| 0.8890895238410610 | 0.5402913044619173 | 0.3150508457342168 | T | T | T |
| 0.7632877764662693 | 0.5201279712636807 | 0.2649335046304038 | T | T | T |
| 0.6408074121245527 | 0.3360851958551199 | 0.2651655695796424 | T | T | T |
| 0.6914311704334584 | 0.3353280601416376 | 0.0844214468190606 | T | T | T |
| 0.8101078111008612 | 0.3504888806520647 | 0.9963985627817701 | T | T | T |
| 0.9174837562606091 | 0.3204754186492904 | 0.1065902073574242 | T | T | T |
| 0.9073023980081256 | 0.3552185396941900 | 0.2983429246909696 | T | T | T |
| 0.7683399885837915 | 0.3692848447818332 | 0.2398423924137678 | T | T | T |
| 0.6701393526093451 | 0.4506486416115180 | 0.1755670769046118 | T | T | T |
| 0.9296404016612057 | 0.4481485626718772 | 0.1561767337472174 | T | T | T |
| 0.5697727868633572 | 0.6271215155359784 | 0.4138051611629120 | T | T | T |
| 0.5918282619214792 | 0.4978153645756049 | 0.4390648993122980 | T | T | T |
| 0.5855388073486937 | 0.3640897564818395 | 0.4428152688100674 | T | T | T |
| 0.7965074499246844 | 0.6300969898878706 | 0.3690140458073768 | T | T | T |
| 0.8004953080949472 | 0.5129352147314833 | 0.4580979675918189 | T | T | T |
| 0.8239034768472308 | 0.3816672392571278 | 0.4400695893385958 | T | T | T |
| 0.0238456053152501 | 0.3630766417786178 | 0.2107567599192155 | T | T | T |
| 0.8552349800479749 | 0.4351111570976313 | 0.7907260790371201 | T | T | T |
| 0.7951409801165028 | 0.4326054925277887 | 0.6150763593697677 | T | T | T |
| 0.6997501378163962 | 0.4257365984696643 | 0.4740730953493416 | T | T | T |
| 0.6032129591389350 | 0.4308523346488564 | 0.6105724604486894 | T | T | T |

**Structure files (CONTCAR) involved in this work:**

|                    |                    |                    |   |   |   |
|--------------------|--------------------|--------------------|---|---|---|
| 0.6039853171962589 | 0.4437240520684121 | 0.8089210795074987 | T | T | T |
| 0.7286109386899076 | 0.4757591672882659 | 0.7717510849891797 | T | T | T |
| 0.8604281390860379 | 0.6818776393285965 | 0.7528630769423906 | T | T | T |
| 0.8145201883540401 | 0.6446847021875253 | 0.5627019050241435 | T | T | T |
| 0.6912293664150935 | 0.6482746068062024 | 0.4894515231424793 | T | T | T |
| 0.5834617151766410 | 0.6679584360026630 | 0.6010877912981933 | T | T | T |
| 0.5951311829008509 | 0.6616264450887253 | 0.7981595928276426 | T | T | T |
| 0.7203124294314438 | 0.6474362670906779 | 0.7391305144759186 | T | T | T |
| 0.8267814128757741 | 0.5492357404485806 | 0.6945558238595063 | T | T | T |
| 0.5804489488933297 | 0.5490626537931632 | 0.6906036825131213 | T | T | T |
| 0.9313099790100029 | 0.3774065262914625 | 0.9268401211238039 | T | T | T |
| 0.9145350310976159 | 0.5105231785056989 | 0.9334534595641744 | T | T | T |
| 0.9029268964031910 | 0.6425976409652026 | 0.9332681013900943 | T | T | T |
| 0.6994761326326790 | 0.3735282999192948 | 0.8938498203234523 | T | T | T |
| 0.6789876413057880 | 0.5009861722039445 | 0.9497119696653544 | T | T | T |
| 0.6866655471620200 | 0.6352467861816620 | 0.9346211572908560 | T | T | T |
| 0.4909191292635347 | 0.4496009150348999 | 0.7158035624386428 | T | T | T |
| 0.4796645263078730 | 0.6336844556926918 | 0.7126834569444345 | T | T | T |
| 0.6442590998383425 | 0.9392368553609711 | 0.2886643912332776 | T | T | T |
| 0.7001452027461962 | 0.9328216911030793 | 0.1107258872361397 | T | T | T |
| 0.8006269807597370 | 0.9439668102205437 | 0.9793023895364809 | T | T | T |
| 0.8987394556862116 | 0.9288887337596622 | 0.1129704174324090 | T | T | T |
| 0.8979963474682003 | 0.9481069728432535 | 0.3104440645192440 | T | T | T |
| 0.7719895536187112 | 0.9683433271281461 | 0.2671439118515961 | T | T | T |
| 0.6419212362706816 | 0.1728104032312462 | 0.2547051854711359 | T | T | T |
| 0.6978354284992445 | 0.1578843582150856 | 0.0799776318179492 | T | T | T |
| 0.8105891419160554 | 0.1468306048639690 | 0.9775663470114588 | T | T | T |
| 0.9137905653653690 | 0.1684384755860538 | 0.0966598930889504 | T | T | T |
| 0.8977694971272163 | 0.1582275349348421 | 0.2939237168139747 | T | T | T |
| 0.7717841137798920 | 0.1422058894754997 | 0.2435371687084909 | T | T | T |
| 0.6795353844612886 | 0.0517910014208784 | 0.1968710888582865 | T | T | T |
| 0.9195839889219887 | 0.0496040782316801 | 0.1832420829854820 | T | T | T |
| 0.5694093278349645 | 0.8750896013944124 | 0.4200641146525745 | T | T | T |
| 0.5839689193858838 | 0.0062856672183615 | 0.4388755441397973 | T | T | T |
| 0.5979077569087173 | 0.1385612967221893 | 0.4357608925003070 | T | T | T |
| 0.8083991850350868 | 0.8711439647850031 | 0.3959826019233817 | T | T | T |
| 0.8171010916643581 | 0.9990330127495786 | 0.4487352360747077 | T | T | T |
| 0.8084297354793700 | 0.1330115752267848 | 0.4351474947353255 | T | T | T |
| 0.0108661032039453 | 0.9538651403083844 | 0.2165136917345781 | T | T | T |
| 0.0164657284184809 | 0.1381439873571150 | 0.2123539821490861 | T | T | T |
| 0.8584010040730682 | 0.0552223663753870 | 0.7856954122082651 | T | T | T |
| 0.8017107869689108 | 0.0729608630091236 | 0.6098159882240798 | T | T | T |
| 0.7015349610424895 | 0.0594396301862626 | 0.4786544292813559 | T | T | T |
| 0.6007791229010675 | 0.0751274206466153 | 0.6076776716645139 | T | T | T |
| 0.6039250399974422 | 0.0516574926886337 | 0.8051236420499223 | T | T | T |
| 0.7295695092035589 | 0.0298901053962449 | 0.7626371724274462 | T | T | T |
| 0.8600047574144687 | 0.8359334939739387 | 0.7641952283250717 | T | T | T |
| 0.8044834094523561 | 0.8328690089524978 | 0.5881833997708316 | T | T | T |
| 0.6923154289306712 | 0.8519390294952776 | 0.4859328618186778 | T | T | T |
| 0.5886502357403187 | 0.8291731003497398 | 0.6052070668831869 | T | T | T |
| 0.6026770595082787 | 0.8516548249193809 | 0.7994589612870834 | T | T | T |
| 0.7296690174291022 | 0.8594002336194088 | 0.7474309083730430 | T | T | T |
| 0.8179650027378775 | 0.9490953822516458 | 0.6808553367469857 | T | T | T |

**Structure files (CONTCAR) involved in this work:**

|                    |                    |                    |   |   |   |
|--------------------|--------------------|--------------------|---|---|---|
| 0.5799592292403710 | 0.9530834249357298 | 0.6736669497842570 | T | T | T |
| 0.9330758095229696 | 0.1269890985506754 | 0.9090678178741999 | T | T | T |
| 0.9184730369436340 | 0.9971988055787678 | 0.9435979376685669 | T | T | T |
| 0.9059091807910182 | 0.8645299028663299 | 0.9440136048912849 | T | T | T |
| 0.6946458900925789 | 0.1302203045657646 | 0.8856122934060835 | T | T | T |
| 0.6848234564582202 | 0.0037585381330198 | 0.9460168581405610 | T | T | T |
| 0.6942683027281541 | 0.8695132479072329 | 0.9395942125051575 | T | T | T |
| 0.4901196179473116 | 0.0485268765082942 | 0.7146343495272905 | T | T | T |
| 0.4841194844319691 | 0.8649807931191287 | 0.7151939082481384 | T | T | T |
| 0.3596657260858273 | 0.4334259131092095 | 0.7158481424392432 | T | T | T |
| 0.3127796860766305 | 0.4426519375043560 | 0.9003553592722905 | T | T | T |
| 0.2020923578846234 | 0.4602667461753785 | 0.0110295258611090 | T | T | T |
| 0.0911220578756986 | 0.4371685017803919 | 0.9067176389201961 | T | T | T |
| 0.1021159500038161 | 0.4345576556775350 | 0.7080526091872505 | T | T | T |
| 0.2295228479921636 | 0.4533729311787816 | 0.7515469405365669 | T | T | T |
| 0.3570699678582708 | 0.6756340282075963 | 0.7477646182904160 | T | T | T |
| 0.3055152828002517 | 0.6419096421764425 | 0.9205748835510050 | T | T | T |
| 0.1904333227083299 | 0.6466541632611761 | 0.0170490890957900 | T | T | T |
| 0.0870382608777782 | 0.6669227296547792 | 0.8951643188500347 | T | T | T |
| 0.1039156894884540 | 0.6591713669961708 | 0.6983223528726704 | T | T | T |
| 0.2275943494581148 | 0.6496120849867868 | 0.7613960919054221 | T | T | T |
| 0.3176201372591800 | 0.5507285618590357 | 0.7786461090070983 | T | T | T |
| 0.0815176213472241 | 0.5492218697762502 | 0.8039154563344544 | T | T | T |
| 0.4333878531437853 | 0.3756068970016786 | 0.5756270568858461 | T | T | T |
| 0.4215643902475310 | 0.5076721486154646 | 0.5737190802347432 | T | T | T |
| 0.3897819953745784 | 0.6376247884632417 | 0.5644758585839406 | T | T | T |
| 0.1938456596520843 | 0.3630024812794218 | 0.6156697354410914 | T | T | T |
| 0.1803483659402597 | 0.4947167772794458 | 0.5770905755831716 | T | T | T |
| 0.2006861325765047 | 0.6274527397243411 | 0.5685557425273657 | T | T | T |
| 0.9853196671320905 | 0.4556648446049392 | 0.7883912189657063 | T | T | T |
| 0.9843939187747809 | 0.6384337826003575 | 0.7752586223857572 | T | T | T |
| 0.1406148786390495 | 0.5711190220728899 | 0.2303268326170377 | T | T | T |
| 0.1945193334534681 | 0.5546003856159732 | 0.4051498687902618 | T | T | T |
| 0.2993038145716095 | 0.5421244681831361 | 0.5260766316382401 | T | T | T |
| 0.3993499428892643 | 0.5684173482395439 | 0.4000092630163274 | T | T | T |
| 0.3980750299762721 | 0.5640960093801395 | 0.2030150128024863 | T | T | T |
| 0.2714596154684628 | 0.5446967864404814 | 0.2472000843453787 | T | T | T |
| 0.1460162831177686 | 0.3232902479365246 | 0.2470137588395411 | T | T | T |
| 0.1952994112856350 | 0.3601893561206592 | 0.4205567317180149 | T | T | T |
| 0.3094790326873744 | 0.3532853140478859 | 0.5183966668060309 | T | T | T |
| 0.4089558891937236 | 0.3306390712539118 | 0.3906601665340036 | T | T | T |
| 0.3959139828227002 | 0.3438482130067069 | 0.1934467056794697 | T | T | T |
| 0.2738173279973449 | 0.3535464454223137 | 0.2604961063419520 | T | T | T |
| 0.1809834969523516 | 0.4498953267341577 | 0.2779529083152286 | T | T | T |
| 0.4111191859542875 | 0.4512994764179944 | 0.3094230741380412 | T | T | T |
| 0.0684892096672313 | 0.6263124906698446 | 0.0830768539747132 | T | T | T |
| 0.0842140875401780 | 0.4938028742329192 | 0.0863400356634912 | T | T | T |
| 0.1153967661192360 | 0.3647509420597452 | 0.0647432610364864 | T | T | T |
| 0.3052199324994179 | 0.6376458450498147 | 0.1156732096398415 | T | T | T |
| 0.3185978730110522 | 0.5068739156211003 | 0.0703090225542130 | T | T | T |
| 0.2968198058958949 | 0.3736455219462775 | 0.0662169801987266 | T | T | T |
| 0.5101632160613859 | 0.5398115552851334 | 0.2955715266310462 | T | T | T |
| 0.5125024314446252 | 0.3659791306078835 | 0.2773219330116713 | T | T | T |

**Structure files (CONTCAR) involved in this work:**

|                     |                    |                    |   |   |   |
|---------------------|--------------------|--------------------|---|---|---|
| 0.4374232729207804  | 0.7506657804724930 | 0.6386538472609605 | T | T | T |
| 0.1926532336633116  | 0.7501392561123680 | 0.6380079439315572 | T | T | T |
| 0.2741178087950821  | 0.7509476822129082 | 0.0250985357119255 | T | T | T |
| 0.1075056948629650  | 0.7495714907916277 | 0.0472237055030630 | T | T | T |
| 0.0682952965782941  | 0.2493278446309172 | 0.1306938891560590 | T | T | T |
| 0.3069983988981579  | 0.2514900088067542 | 0.1381205993976033 | T | T | T |
| 0.2243720163629437  | 0.2500140314764722 | 0.5234966602859304 | T | T | T |
| 0.3934619046288855  | 0.2510253077975980 | 0.5461398967175657 | T | T | T |
| 0.5578371693301468  | 0.2509944649647891 | 0.3536112998918622 | T | T | T |
| 0.8083511627471240  | 0.2511970447050929 | 0.3476148514147688 | T | T | T |
| 0.7286104198152016  | 0.2502336026887025 | 0.9431667524868327 | T | T | T |
| 0.8926234096866641  | 0.2506296102085260 | 0.9446345502654855 | T | T | T |
| 0.9474437318603977  | 0.7546947735617375 | 0.8552101961633974 | T | T | T |
| 0.6858402479783866  | 0.7531350178890259 | 0.8508267909856190 | T | T | T |
| 0.7744108392216604  | 0.7487957377800131 | 0.4448785291056793 | T | T | T |
| 0.6087996170081288  | 0.7502986432832784 | 0.4504826763441712 | T | T | T |
| 0.9395558608561598  | 0.4916570542146517 | 0.5243765005018748 | T | T | T |
| 0.9336921484700489  | 0.4073899809867742 | 0.4348150775843728 | T | T | T |
| 0.8737232097271097  | 0.5580120766546691 | 0.5580025332343553 | T | T | T |
| 0.0294494851243462  | 0.5886939205265668 | 0.5461897614623762 | T | T | T |
| 0.0772109511480270  | 0.5705867265869632 | 0.4315416936599382 | T | T | T |
| 0.9699252064834284  | 0.4812824163175740 | 0.5797908718532415 | T | T | T |
| -0.0018658821906946 | 0.7005766978388631 | 0.4809067815620182 | T | T | T |
| 0.0141089000096370  | 0.5740092112485340 | 0.2932353652792580 | T | T | T |
| 0.0459176177786685  | 0.6842515790478286 | 0.3645456529964040 | T | T | T |
| 0.0452243156232562  | 0.6055133374857050 | 0.4723481238881723 | T | T | T |
| 0.0287022852060690  | 0.6659746082148691 | 0.4371199877552057 | T | T | T |

**Figure 4(a) Route(b-i)-Zn ① as same as Route(a)-Zn ①****Figure 4(a) Route(b-i)-Zn ②**

Si Al O Zn H C

1.0000000000000000

20.0219999999999985 0.0000000000000000 0.0000000000000000

0.0000000000000000 19.8990000000000009 0.0000000000000000

0.0000000000000000 0.0000000000000000 13.3829999999999991

93 3 193 2 6 2

Selective dynamics

Direct

|                    |                    |                    |   |   |   |
|--------------------|--------------------|--------------------|---|---|---|
| 0.4226499999999973 | 0.0601399999999970 | 0.6481700000000004 | T | T | T |
| 0.3055299999999974 | 0.0322099999999992 | 0.7924999999999969 | T | T | T |
| 0.2821599999999975 | 0.0557900000000018 | 0.0170499999999976 | T | T | T |
| 0.1232400000000027 | 0.0613600000000005 | 0.0117100000000008 | T | T | T |
| 0.0683399999999992 | 0.0312100000000015 | 0.8008799999999994 | T | T | T |
| 0.1807099999999977 | 0.0649599999999992 | 0.6653400000000005 | T | T | T |
| 0.4183299999999974 | 0.8273200000000003 | 0.6683900000000023 | T | T | T |
| 0.3008000000000024 | 0.8732400000000027 | 0.8003500000000017 | T | T | T |
| 0.2667900000000003 | 0.8303599999999989 | 0.0198099999999997 | T | T | T |
| 0.1111199999999997 | 0.8264700000000005 | 0.0135700000000014 | T | T | T |
| 0.0665600000000026 | 0.8748000000000005 | 0.7990100000000027 | T | T | T |
| 0.1790700000000029 | 0.8290199999999999 | 0.6641400000000033 | T | T | T |
| 0.0752600000000001 | 0.9405100000000033 | 0.1489300000000000 | T | T | T |
| 0.1948500000000024 | 0.9698899999999995 | 0.2899000000000029 | T | T | T |
| 0.2164700000000011 | 0.9438999999999993 | 0.5159799999999990 | T | T | T |

**Structure files (CONTCAR) involved in this work:**

|                    |                    |                    |   |   |   |
|--------------------|--------------------|--------------------|---|---|---|
| 0.3768099999999990 | 0.9355199999999968 | 0.5136099999999999 | T | T | T |
| 0.4332300000000018 | 0.9688400000000001 | 0.3013899999999978 | T | T | T |
| 0.3203499999999977 | 0.9349399999999974 | 0.1642300000000034 | T | T | T |
| 0.0821899999999971 | 0.1716100000000012 | 0.1666299999999978 | T | T | T |
| 0.1978399999999993 | 0.1284100000000024 | 0.3017400000000023 | T | T | T |
| 0.2315899999999971 | 0.1688800000000015 | 0.5187600000000003 | T | T | T |
| 0.3871699999999976 | 0.1736999999999966 | 0.5084400000000002 | T | T | T |
| 0.4344299999999990 | 0.1272599999999997 | 0.2945399999999978 | T | T | T |
| 0.3177400000000006 | 0.1726900000000029 | 0.1659099999999967 | T | T | T |
| 0.5780000000000030 | 0.5556399999999968 | 0.3551000000000002 | T | T | T |
| 0.6899599999999992 | 0.5277799999999999 | 0.2028200000000027 | T | T | T |
| 0.7164399999999986 | 0.5682899999999975 | 0.9857000000000014 | T | T | T |
| 0.8750599999999977 | 0.5735600000000005 | 0.9864099999999993 | T | T | T |
| 0.8108399999999989 | 0.5510999999999981 | 0.3462600000000009 | T | T | T |
| 0.5730199999999996 | 0.3292599999999979 | 0.3320999999999970 | T | T | T |
| 0.6931099999999972 | 0.3740700000000032 | 0.1936400000000020 | T | T | T |
| 0.7326600000000028 | 0.3283600000000035 | 0.9798199999999966 | T | T | T |
| 0.8876700000000000 | 0.3251700000000000 | 0.9891300000000030 | T | T | T |
| 0.9432899999999975 | 0.3714000000000013 | 0.1884900000000016 | T | T | T |
| 0.9205499999999986 | 0.4465700000000012 | 0.8605000000000018 | T | T | T |
| 0.8004200000000026 | 0.4743599999999972 | 0.7203400000000002 | T | T | T |
| 0.7801699999999983 | 0.4367700000000028 | 0.4966700000000017 | T | T | T |
| 0.6227700000000027 | 0.4286400000000015 | 0.4893000000000001 | T | T | T |
| 0.5701600000000013 | 0.4692500000000024 | 0.7017099999999985 | T | T | T |
| 0.6766199999999998 | 0.4475199999999973 | 0.8558599999999998 | T | T | T |
| 0.9207200000000029 | 0.6791699999999992 | 0.8301400000000001 | T | T | T |
| 0.7678200000000004 | 0.6703400000000030 | 0.4651500000000013 | T | T | T |
| 0.6128300000000024 | 0.6731699999999989 | 0.4881600000000006 | T | T | T |
| 0.5601500000000001 | 0.6277699999999982 | 0.6990300000000005 | T | T | T |
| 0.6711900000000028 | 0.6747399999999999 | 0.8290099999999967 | T | T | T |
| 0.5777599999999978 | 0.9454300000000018 | 0.3584099999999992 | T | T | T |
| 0.6983000000000033 | 0.9745100000000022 | 0.2158900000000017 | T | T | T |
| 0.7191199999999967 | 0.9387200000000036 | 0.9936700000000016 | T | T | T |
| 0.8790899999999979 | 0.9345900000000000 | 0.9950600000000023 | T | T | T |
| 0.9303900000000027 | 0.9720500000000030 | 0.2055599999999984 | T | T | T |
| 0.8223199999999977 | 0.9473100000000017 | 0.3560099999999977 | T | T | T |
| 0.5772400000000033 | 0.1742199999999983 | 0.3293400000000020 | T | T | T |
| 0.6976399999999998 | 0.1327199999999991 | 0.1943699999999993 | T | T | T |
| 0.7321799999999996 | 0.1718899999999977 | 0.9723299999999995 | T | T | T |
| 0.8867499999999993 | 0.1732599999999991 | 0.9806000000000026 | T | T | T |
| 0.9344699999999975 | 0.1306200000000004 | 0.1968499999999977 | T | T | T |
| 0.8194999999999979 | 0.1760000000000019 | 0.3317400000000035 | T | T | T |
| 0.9233600000000024 | 0.0536699999999968 | 0.8549700000000016 | T | T | T |
| 0.8013100000000009 | 0.0264400000000009 | 0.7091500000000011 | T | T | T |
| 0.7813900000000018 | 0.0673800000000000 | 0.4916800000000023 | T | T | T |
| 0.6210200000000015 | 0.0702100000000030 | 0.4897700000000000 | T | T | T |
| 0.5682499999999990 | 0.0323399999999978 | 0.6987799999999993 | T | T | T |
| 0.6781199999999998 | 0.0545899999999975 | 0.8501499999999993 | T | T | T |
| 0.9236799999999974 | 0.8317400000000035 | 0.8375399999999971 | T | T | T |
| 0.8019699999999972 | 0.8689999999999998 | 0.6960699999999989 | T | T | T |
| 0.7686599999999970 | 0.8272600000000025 | 0.4787800000000004 | T | T | T |
| 0.6136499999999998 | 0.8268500000000003 | 0.4897599999999969 | T | T | T |
| 0.5631199999999978 | 0.8751600000000010 | 0.6977800000000016 | T | T | T |

**Structure files (CONTCAR) involved in this work:**

|                     |                     |                     |   |   |   |
|---------------------|---------------------|---------------------|---|---|---|
| 0.6774699999999996  | 0.8332300000000004  | 0.8345300000000009  | T | T | T |
| 0.42349000000000010 | 0.4418199999999999  | 0.6447399999999988  | T | T | T |
| 0.30445000000000028 | 0.46934000000000025 | 0.7869699999999966  | T | T | T |
| 0.27920000000000030 | 0.44581000000000016 | 0.0140999999999991  | T | T | T |
| 0.12113999999999969 | 0.43769000000000035 | 0.01525000000000018 | T | T | T |
| 0.06396000000000016 | 0.4701499999999967  | 0.80131000000000009 | T | T | T |
| 0.17638999999999978 | 0.43574000000000027 | 0.6608999999999980  | T | T | T |
| 0.41503000000000016 | 0.67349000000000010 | 0.66602000000000032 | T | T | T |
| 0.30017000000000014 | 0.62778000000000013 | 0.79984000000000032 | T | T | T |
| 0.26680999999999995 | 0.66892000000000000 | 0.01868999999999994 | T | T | T |
| 0.11149000000000034 | 0.67262000000000020 | 0.00804000000000012 | T | T | T |
| 0.06257999999999970 | 0.62890000000000016 | 0.7934199999999976  | T | T | T |
| 0.17913000000000007 | 0.6719399999999993  | 0.66353000000000015 | T | T | T |
| 0.07750999999999966 | 0.55924000000000026 | 0.14856000000000034 | T | T | T |
| 0.19617000000000022 | 0.52886000000000017 | 0.2886299999999977  | T | T | T |
| 0.21399000000000026 | 0.5558199999999971  | 0.5153899999999965  | T | T | T |
| 0.37299000000000015 | 0.56526000000000021 | 0.5144099999999980  | T | T | T |
| 0.42902999999999974 | 0.53041000000000034 | 0.30438000000000019 | T | T | T |
| 0.32144000000000026 | 0.56358000000000017 | 0.1613699999999980  | T | T | T |
| 0.08718999999999997 | 0.32376000000000000 | 0.16044000000000012 | T | T | T |
| 0.19908000000000021 | 0.37086000000000004 | 0.29898000000000002 | T | T | T |
| 0.22970999999999972 | 0.3301799999999986  | 0.5179299999999998  | T | T | T |
| 0.38470999999999983 | 0.32753000000000030 | 0.5061299999999989  | T | T | T |
| 0.42987999999999972 | 0.37369000000000034 | 0.29294000000000015 | T | T | T |
| 0.31730999999999991 | 0.32988000000000028 | 0.16163000000000024 | T | T | T |
| 0.92215000000000020 | 0.5270999999999972  | 0.19487000000000017 | T | T | T |
| 0.82242999999999971 | 0.3363999999999976  | 0.32612000000000031 | T | T | T |
| 0.79751000000000026 | 0.6380699999999990  | 0.6970499999999973  | T | T | T |
| 0.01026000000000024 | 0.5572099999999978  | 0.22668000000000018 | T | T | T |
| 0.35923999999999998 | 0.0708399999999969  | 0.7222399999999993  | T | T | T |
| 0.31723999999999982 | 0.05440000000000011 | 0.9076599999999999  | T | T | T |
| 0.20233999999999995 | 0.04495000000000000 | 0.00545000000000033 | T | T | T |
| 0.09228999999999984 | 0.07043000000000018 | 0.90093000000000025 | T | T | T |
| 0.10394999999999975 | 0.0648199999999974  | 0.7040099999999967  | T | T | T |
| 0.22988000000000014 | 0.0524199999999979  | 0.76046000000000019 | T | T | T |
| 0.35954999999999987 | 0.82795000000000013 | 0.75189000000000031 | T | T | T |
| 0.30008999999999973 | 0.8611999999999966  | 0.91964000000000011 | T | T | T |
| 0.18829000000000021 | 0.8511999999999986  | 0.0244199999999992  | T | T | T |
| 0.08823999999999990 | 0.8328599999999966  | 0.89802000000000025 | T | T | T |
| 0.10253000000000016 | 0.8408999999999978  | 0.7018899999999988  | T | T | T |
| 0.22874000000000019 | 0.85139000000000021 | 0.75466000000000012 | T | T | T |
| 0.31602999999999978 | 0.95174000000000009 | 0.77662000000000012 | T | T | T |
| 0.09047999999999994 | 0.9525099999999966  | 0.8099199999999982  | T | T | T |
| 0.43294999999999982 | 0.1273399999999967  | 0.5807599999999979  | T | T | T |
| 0.41190999999999989 | 0.9961899999999986  | 0.5747599999999977  | T | T | T |
| 0.39269000000000018 | 0.86419000000000007 | 0.5672199999999989  | T | T | T |
| 0.19644000000000026 | 0.13819000000000016 | 0.6175899999999999  | T | T | T |
| 0.19004999999999994 | 0.00585000000000024 | 0.58335000000000029 | T | T | T |
| 0.19377999999999967 | 0.8723999999999990  | 0.5639099999999999  | T | T | T |
| 0.98830999999999985 | 0.03824000000000018 | 0.78605000000000030 | T | T | T |
| 0.98593000000000033 | 0.8719699999999975  | 0.7858799999999988  | T | T | T |
| 0.13936999999999995 | 0.93189000000000028 | 0.2221299999999999  | T | T | T |
| 0.18323999999999978 | 0.95000000000000028 | 0.4058899999999994  | T | T | T |



**Structure files (CONTCAR) involved in this work:**

|                    |                    |                    |   |   |   |
|--------------------|--------------------|--------------------|---|---|---|
| 0.2970299999999995 | 0.9481200000000030 | 0.5085100000000011 | T | T | T |
| 0.4073899999999995 | 0.9318999999999988 | 0.4021400000000028 | T | T | T |
| 0.3964900000000000 | 0.9352799999999988 | 0.2053900000000013 | T | T | T |
| 0.2696400000000025 | 0.9468000000000032 | 0.2577799999999968 | T | T | T |
| 0.1379900000000021 | 0.1726600000000005 | 0.2545900000000003 | T | T | T |
| 0.1952199999999991 | 0.1364599999999996 | 0.4218600000000023 | T | T | T |
| 0.3100900000000024 | 0.1482000000000028 | 0.5162600000000026 | T | T | T |
| 0.4125000000000014 | 0.1684800000000024 | 0.3939400000000006 | T | T | T |
| 0.3948600000000013 | 0.1584500000000020 | 0.1986300000000014 | T | T | T |
| 0.2699500000000015 | 0.1545599999999965 | 0.2610200000000020 | T | T | T |
| 0.1867500000000035 | 0.0502299999999991 | 0.2709800000000016 | T | T | T |
| 0.4149600000000007 | 0.0484799999999979 | 0.3077899999999971 | T | T | T |
| 0.0643400000000014 | 0.8707899999999995 | 0.0873100000000022 | T | T | T |
| 0.0854900000000001 | 0.0000700000000009 | 0.0677900000000022 | T | T | T |
| 0.1108100000000007 | 0.1307299999999998 | 0.0712600000000023 | T | T | T |
| 0.3056399999999968 | 0.8617800000000031 | 0.1150700000000029 | T | T | T |
| 0.3121700000000018 | 0.9944199999999981 | 0.0824599999999975 | T | T | T |
| 0.2979100000000017 | 0.1276599999999988 | 0.0693100000000015 | T | T | T |
| 0.5129200000000012 | 0.9574199999999990 | 0.2877900000000011 | T | T | T |
| 0.5144499999999965 | 0.1349700000000027 | 0.2775699999999972 | T | T | T |
| 0.6349400000000003 | 0.5662000000000020 | 0.2708500000000029 | T | T | T |
| 0.7030900000000031 | 0.5737400000000008 | 0.1050200000000032 | T | T | T |
| 0.7957999999999998 | 0.5620100000000008 | 0.9609299999999976 | T | T | T |
| 0.8894900000000021 | 0.5783600000000035 | 0.1041299999999978 | T | T | T |
| 0.8858600000000010 | 0.5352299999999985 | 0.3124600000000015 | T | T | T |
| 0.7589100000000002 | 0.5223900000000015 | 0.2662300000000002 | T | T | T |
| 0.6373400000000018 | 0.3352999999999966 | 0.2606899999999968 | T | T | T |
| 0.6936000000000035 | 0.3374999999999986 | 0.0846999999999980 | T | T | T |
| 0.8104700000000022 | 0.3514199999999974 | 0.9917900000000017 | T | T | T |
| 0.9177200000000028 | 0.3200300000000027 | 0.1011999999999986 | T | T | T |
| 0.9054300000000026 | 0.3534399999999991 | 0.2920900000000017 | T | T | T |
| 0.7646999999999977 | 0.3718999999999966 | 0.2465800000000016 | T | T | T |
| 0.6671199999999970 | 0.4517099999999985 | 0.1766599999999983 | T | T | T |
| 0.9310800000000015 | 0.4471899999999991 | 0.1525900000000036 | T | T | T |
| 0.5679500000000033 | 0.6256199999999978 | 0.4159000000000006 | T | T | T |
| 0.5989599999999982 | 0.4972199999999987 | 0.4341599999999985 | T | T | T |
| 0.5861400000000003 | 0.3639000000000010 | 0.4409800000000033 | T | T | T |
| 0.7996699999999990 | 0.6308700000000016 | 0.3694800000000029 | T | T | T |
| 0.7968299999999999 | 0.5150500000000022 | 0.4582300000000004 | T | T | T |
| 0.8318799999999982 | 0.3872500000000016 | 0.4389899999999969 | T | T | T |
| 0.0231300000000019 | 0.3607900000000015 | 0.2075400000000016 | T | T | T |
| 0.8543499999999966 | 0.4376000000000033 | 0.7911900000000003 | T | T | T |
| 0.7971599999999981 | 0.4338800000000020 | 0.6145599999999973 | T | T | T |
| 0.7032700000000034 | 0.4193700000000007 | 0.4730100000000022 | T | T | T |
| 0.6058799999999991 | 0.4317700000000002 | 0.6074500000000000 | T | T | T |
| 0.6028200000000012 | 0.4434200000000033 | 0.8059399999999997 | T | T | T |
| 0.7271500000000017 | 0.4750000000000014 | 0.7694100000000006 | T | T | T |
| 0.8592500000000030 | 0.6825499999999991 | 0.7544899999999970 | T | T | T |
| 0.8122299999999996 | 0.6473099999999974 | 0.5636300000000034 | T | T | T |
| 0.6906800000000004 | 0.6480000000000032 | 0.4841399999999965 | T | T | T |
| 0.5851699999999980 | 0.6689500000000024 | 0.6012300000000010 | T | T | T |
| 0.5929500000000019 | 0.6612599999999986 | 0.7983199999999968 | T | T | T |
| 0.7177900000000008 | 0.6506899999999973 | 0.7374300000000034 | T | T | T |

**Structure files (CONTCAR) involved in this work:**

|                    |                    |                    |   |   |   |
|--------------------|--------------------|--------------------|---|---|---|
| 0.8237200000000016 | 0.5514399999999995 | 0.6949699999999979 | T | T | T |
| 0.5815399999999968 | 0.5494600000000034 | 0.6877300000000020 | T | T | T |
| 0.9316600000000008 | 0.3771199999999979 | 0.9219500000000025 | T | T | T |
| 0.9150199999999984 | 0.5105300000000028 | 0.9346299999999985 | T | T | T |
| 0.9013700000000000 | 0.6426099999999977 | 0.9348000000000027 | T | T | T |
| 0.6979899999999972 | 0.3733599999999981 | 0.8928999999999974 | T | T | T |
| 0.6777200000000008 | 0.5008600000000030 | 0.9473899999999986 | T | T | T |
| 0.6865200000000016 | 0.6346800000000030 | 0.9325600000000023 | T | T | T |
| 0.4913799999999995 | 0.4508799999999979 | 0.7087300000000027 | T | T | T |
| 0.4791999999999987 | 0.6321200000000005 | 0.7073499999999981 | T | T | T |
| 0.6434399999999982 | 0.9399200000000008 | 0.2884799999999998 | T | T | T |
| 0.6991399999999999 | 0.9339799999999983 | 0.1107500000000030 | T | T | T |
| 0.7995000000000019 | 0.9454500000000010 | 0.9791900000000027 | T | T | T |
| 0.8976200000000034 | 0.9306699999999992 | 0.1127899999999968 | T | T | T |
| 0.8974199999999968 | 0.9478300000000033 | 0.3103600000000029 | T | T | T |
| 0.7714500000000015 | 0.9685699999999997 | 0.2669899999999998 | T | T | T |
| 0.6397499999999994 | 0.1738399999999984 | 0.2528999999999968 | T | T | T |
| 0.6971500000000006 | 0.1578999999999979 | 0.0793999999999997 | T | T | T |
| 0.8096999999999994 | 0.1469200000000015 | 0.9762699999999995 | T | T | T |
| 0.9130400000000023 | 0.1687500000000028 | 0.0947000000000031 | T | T | T |
| 0.8960500000000025 | 0.1626400000000032 | 0.2922900000000013 | T | T | T |
| 0.7700600000000009 | 0.1461899999999972 | 0.2444300000000013 | T | T | T |
| 0.6796900000000008 | 0.0529700000000020 | 0.1985699999999966 | T | T | T |
| 0.9167300000000012 | 0.0512900000000016 | 0.1864399999999975 | T | T | T |
| 0.5685500000000019 | 0.8751699999999971 | 0.4192600000000013 | T | T | T |
| 0.5831400000000002 | 0.0065900000000028 | 0.4385699999999986 | T | T | T |
| 0.5975999999999999 | 0.1390400000000014 | 0.4348099999999988 | T | T | T |
| 0.8075400000000030 | 0.8718500000000020 | 0.3964199999999991 | T | T | T |
| 0.8168300000000031 | 0.9998300000000029 | 0.4481800000000007 | T | T | T |
| 0.8079999999999998 | 0.1336700000000022 | 0.4349100000000021 | T | T | T |
| 0.0096899999999991 | 0.9560099999999991 | 0.2155800000000028 | T | T | T |
| 0.0147499999999994 | 0.1385300000000029 | 0.2122900000000030 | T | T | T |
| 0.8579399999999993 | 0.0544799999999981 | 0.7843599999999995 | T | T | T |
| 0.8005799999999965 | 0.0729299999999995 | 0.6094599999999986 | T | T | T |
| 0.7009199999999964 | 0.0597500000000011 | 0.4776099999999985 | T | T | T |
| 0.6001199999999969 | 0.0754900000000021 | 0.6068899999999999 | T | T | T |
| 0.6032099999999971 | 0.0518900000000002 | 0.8041100000000014 | T | T | T |
| 0.7289299999999983 | 0.0300000000000011 | 0.7630199999999974 | T | T | T |
| 0.8602199999999982 | 0.8361000000000018 | 0.7632899999999978 | T | T | T |
| 0.8034499999999980 | 0.8319899999999976 | 0.5879499999999993 | T | T | T |
| 0.6912200000000013 | 0.8517799999999980 | 0.4857000000000014 | T | T | T |
| 0.5875300000000010 | 0.8290799999999976 | 0.6043799999999990 | T | T | T |
| 0.6020699999999977 | 0.8525800000000032 | 0.7986799999999974 | T | T | T |
| 0.7294800000000023 | 0.8574199999999976 | 0.7478499999999997 | T | T | T |
| 0.8161300000000011 | 0.9485900000000029 | 0.6799899999999965 | T | T | T |
| 0.5789499999999990 | 0.9532499999999970 | 0.6723199999999991 | T | T | T |
| 0.9322900000000018 | 0.1267199999999988 | 0.9076700000000031 | T | T | T |
| 0.9180199999999985 | 0.9969999999999999 | 0.9424300000000017 | T | T | T |
| 0.9036400000000029 | 0.8645599999999973 | 0.9447299999999998 | T | T | T |
| 0.6935300000000026 | 0.1310500000000019 | 0.8847999999999985 | T | T | T |
| 0.6834300000000013 | 0.0048600000000008 | 0.9462199999999967 | T | T | T |
| 0.6934499999999986 | 0.8707100000000025 | 0.9393999999999991 | T | T | T |
| 0.4894299999999987 | 0.0485499999999988 | 0.7139700000000033 | T | T | T |

**Structure files (CONTCAR) involved in this work:**

|                    |                    |                    |   |   |   |
|--------------------|--------------------|--------------------|---|---|---|
| 0.4834299999999985 | 0.8646499999999975 | 0.7150400000000019 | T | T | T |
| 0.3607099999999974 | 0.4312499999999986 | 0.7204800000000020 | T | T | T |
| 0.3106099999999969 | 0.4458199999999977 | 0.9024599999999978 | T | T | T |
| 0.1990100000000012 | 0.4610199999999978 | 0.0114400000000003 | T | T | T |
| 0.0893999999999977 | 0.4363099999999989 | 0.9045800000000028 | T | T | T |
| 0.1014399999999966 | 0.4352200000000011 | 0.7070799999999977 | T | T | T |
| 0.2295599999999993 | 0.4506399999999999 | 0.7497800000000012 | T | T | T |
| 0.3578499999999991 | 0.6746499999999997 | 0.7520799999999994 | T | T | T |
| 0.3011699999999990 | 0.6377799999999993 | 0.9195399999999978 | T | T | T |
| 0.1883300000000006 | 0.6471999999999980 | 0.0188599999999965 | T | T | T |
| 0.0870699999999971 | 0.6682100000000020 | 0.8933800000000005 | T | T | T |
| 0.1018800000000013 | 0.6596400000000031 | 0.6970699999999965 | T | T | T |
| 0.2273199999999989 | 0.6489800000000017 | 0.7557299999999998 | T | T | T |
| 0.3161399999999972 | 0.5497599999999991 | 0.7734900000000025 | T | T | T |
| 0.0814799999999991 | 0.5498499999999993 | 0.8042400000000001 | T | T | T |
| 0.4317100000000025 | 0.3762200000000036 | 0.5733299999999986 | T | T | T |
| 0.4137899999999988 | 0.5076699999999974 | 0.5744100000000003 | T | T | T |
| 0.3843900000000033 | 0.6380699999999990 | 0.5662799999999990 | T | T | T |
| 0.1913100000000014 | 0.3623300000000000 | 0.6133000000000024 | T | T | T |
| 0.1797100000000000 | 0.4946100000000015 | 0.5766500000000008 | T | T | T |
| 0.1949200000000033 | 0.6281400000000019 | 0.5636399999999995 | T | T | T |
| 0.9843400000000031 | 0.4580500000000001 | 0.7860099999999974 | T | T | T |
| 0.9830200000000033 | 0.6383200000000002 | 0.7769600000000025 | T | T | T |
| 0.1426099999999977 | 0.5690200000000019 | 0.2183700000000002 | T | T | T |
| 0.1839500000000029 | 0.5538600000000002 | 0.4023499999999984 | T | T | T |
| 0.2942099999999996 | 0.5454999999999970 | 0.5141300000000015 | T | T | T |
| 0.4004899999999978 | 0.5702300000000022 | 0.4011199999999988 | T | T | T |
| 0.3972399999999965 | 0.5642700000000005 | 0.2042599999999979 | T | T | T |
| 0.2713299999999990 | 0.5476900000000029 | 0.2547399999999982 | T | T | T |
| 0.1455600000000032 | 0.3226099999999974 | 0.2446800000000025 | T | T | T |
| 0.1950199999999995 | 0.3604300000000009 | 0.4182599999999965 | T | T | T |
| 0.3077600000000018 | 0.3526499999999970 | 0.5196100000000001 | T | T | T |
| 0.4057200000000023 | 0.3300399999999968 | 0.3891500000000008 | T | T | T |
| 0.3947199999999995 | 0.3453500000000034 | 0.1913499999999999 | T | T | T |
| 0.2732900000000029 | 0.3516300000000001 | 0.2592199999999991 | T | T | T |
| 0.1821600000000032 | 0.4492300000000000 | 0.2736000000000018 | T | T | T |
| 0.4079499999999996 | 0.4515600000000006 | 0.3111299999999986 | T | T | T |
| 0.0655100000000033 | 0.6242400000000004 | 0.0787100000000009 | T | T | T |
| 0.0787699999999987 | 0.4910599999999974 | 0.0843300000000013 | T | T | T |
| 0.1146600000000007 | 0.3631000000000029 | 0.0617299999999972 | T | T | T |
| 0.3038000000000025 | 0.6370000000000005 | 0.1155100000000004 | T | T | T |
| 0.3146800000000027 | 0.5055600000000027 | 0.0769599999999997 | T | T | T |
| 0.2940699999999978 | 0.3730699999999985 | 0.0644899999999993 | T | T | T |
| 0.5093200000000024 | 0.5365200000000030 | 0.2984599999999986 | T | T | T |
| 0.5100199999999973 | 0.3669700000000020 | 0.2788600000000017 | T | T | T |
| 0.4360199999999992 | 0.7500799999999970 | 0.6395899999999983 | T | T | T |
| 0.1907599999999974 | 0.7503999999999991 | 0.6362299999999976 | T | T | T |
| 0.2747499999999974 | 0.7494999999999976 | 0.0215499999999977 | T | T | T |
| 0.1038599999999974 | 0.7486699999999971 | 0.0485699999999980 | T | T | T |
| 0.0689700000000002 | 0.2476600000000033 | 0.1281999999999996 | T | T | T |
| 0.3078100000000035 | 0.2510100000000008 | 0.1349400000000003 | T | T | T |
| 0.2225699999999975 | 0.2495400000000032 | 0.5203399999999974 | T | T | T |
| 0.3929499999999990 | 0.2510300000000001 | 0.5457899999999967 | T | T | T |

**Structure files (CONTCAR) involved in this work:**

|                    |                    |                    |   |   |   |
|--------------------|--------------------|--------------------|---|---|---|
| 0.555349999999971  | 0.2510400000000033 | 0.3527600000000035 | T | T | T |
| 0.806429999999989  | 0.253709999999981  | 0.3533400000000029 | T | T | T |
| 0.727899999999982  | 0.250799999999981  | 0.9438000000000031 | T | T | T |
| 0.891629999999993  | 0.250289999999997  | 0.940559999999978  | T | T | T |
| 0.9463700000000017 | 0.754789999999998  | 0.8571900000000028 | T | T | T |
| 0.6828300000000027 | 0.753599999999987  | 0.854059999999969  | T | T | T |
| 0.7734700000000032 | 0.749549999999993  | 0.4424500000000009 | T | T | T |
| 0.607709999999973  | 0.7501600000000010 | 0.449039999999966  | T | T | T |
| 0.9373700000000014 | 0.5066800000000029 | 0.5190100000000015 | T | T | T |
| 0.933019999999991  | 0.4084300000000027 | 0.4373900000000006 | T | T | T |
| 0.868319999999971  | 0.562899999999991  | 0.558819999999972  | T | T | T |
| 0.9686400000000006 | 0.496139999999969  | 0.5727600000000024 | T | T | T |
| 0.061889999999982  | 0.4298000000000002 | 0.476649999999994  | T | T | T |
| 0.049559999999996  | 0.3437500000000000 | 0.431429999999989  | T | T | T |
| 0.9997800000000012 | 0.569339999999968  | 0.3813000000000031 | T | T | T |
| 0.9777800000000028 | 0.6420200000000023 | 0.307259999999994  | T | T | T |
| 0.0642500000000013 | 0.6201300000000032 | 0.3249300000000019 | T | T | T |
| 0.0262400000000014 | 0.391519999999999  | 0.451839999999971  | T | T | T |
| 0.013399999999972  | 0.600709999999994  | 0.317129999999988  | T | T | T |

**Figure 4(a) Route(b-i)-Zn ③**

Si Al O Zn H C

1.000000000000000

20.021999999999985 0.000000000000000 0.000000000000000

0.000000000000000 19.899000000000009 0.000000000000000

0.000000000000000 0.000000000000000 13.382999999999991

93 3 193 2 6 2

Selective dynamics

Direct

|                    |                    |                    |   |   |   |
|--------------------|--------------------|--------------------|---|---|---|
| 0.4228840452422206 | 0.0620393275568075 | 0.6459899928323448 | T | T | T |
| 0.3043477200335022 | 0.0304209287499697 | 0.7881772461352745 | T | T | T |
| 0.2823375374419343 | 0.0555445997402927 | 0.0135867224228079 | T | T | T |
| 0.1228850619609535 | 0.0623051284879766 | 0.0113958214859529 | T | T | T |
| 0.0672642371445372 | 0.0323260294196130 | 0.7998597389684271 | T | T | T |
| 0.1789350118185235 | 0.0660134728412405 | 0.6628698330342734 | T | T | T |
| 0.4175637325310126 | 0.8299094813931330 | 0.6674297344697339 | T | T | T |
| 0.3006268558539308 | 0.8715165419630192 | 0.8000159505780849 | T | T | T |
| 0.2656273896033974 | 0.8340413621837512 | 0.0201012478445648 | T | T | T |
| 0.1118188673714126 | 0.8281867255118278 | 0.0093403284243888 | T | T | T |
| 0.0660319787052170 | 0.8756278252601618 | 0.7947798795751509 | T | T | T |
| 0.1798572167706167 | 0.8278589706721996 | 0.6628802584755418 | T | T | T |
| 0.0753669898671789 | 0.9400773113469623 | 0.1476517520994717 | T | T | T |
| 0.1931802446538968 | 0.9703567311346162 | 0.2900712066459813 | T | T | T |
| 0.2160839024547959 | 0.9450791686348795 | 0.5154433513589449 | T | T | T |
| 0.3754963046465749 | 0.9388034875055951 | 0.5123338662994901 | T | T | T |
| 0.4331003570427178 | 0.9692157162834603 | 0.3016979325860734 | T | T | T |
| 0.3195510574590034 | 0.9373811485882676 | 0.1651530208586399 | T | T | T |
| 0.0821309565397651 | 0.1737221584052673 | 0.1642846660591344 | T | T | T |
| 0.1971956788796278 | 0.1288023149049891 | 0.2984661149165341 | T | T | T |
| 0.2307624118741882 | 0.1712138098120655 | 0.5167925351794133 | T | T | T |
| 0.3867016156587709 | 0.1763271536291076 | 0.5076154735378556 | T | T | T |
| 0.4347140347127053 | 0.1278382759652527 | 0.2945925997932899 | T | T | T |
| 0.3186721224543720 | 0.1706818790781105 | 0.1617793335086205 | T | T | T |

**Structure files (CONTCAR) involved in this work:**

|                    |                    |                     |   |   |   |
|--------------------|--------------------|---------------------|---|---|---|
| 0.5745134913333675 | 0.5578506456933697 | 0.3528617131233093  | T | T | T |
| 0.6900263846306379 | 0.5282372873484097 | 0.2011837855918024  | T | T | T |
| 0.7117976868385650 | 0.5695828429798884 | 0.9838971422346324  | T | T | T |
| 0.8692689648583720 | 0.5747026578893909 | 0.9836730033809278  | T | T | T |
| 0.8112906506303201 | 0.5515434148970749 | 0.3449316310922808  | T | T | T |
| 0.5736445048899641 | 0.3309368627589504 | 0.3325696757423539  | T | T | T |
| 0.6953288914878187 | 0.3741193935477138 | 0.1947921332962473  | T | T | T |
| 0.7286385575009982 | 0.3283187211151514 | 0.9816275256648526  | T | T | T |
| 0.8836115102417442 | 0.3278943624262090 | 0.9935454561870370  | T | T | T |
| 0.9414532802657405 | 0.3756508161478718 | 0.1879393457125608  | T | T | T |
| 0.9182174925110383 | 0.4475856395518497 | 0.8592530123979428  | T | T | T |
| 0.7958893342661266 | 0.4738007983539709 | 0.7220843490844161  | T | T | T |
| 0.7742589966855565 | 0.4377415764953856 | 0.4958940300658506  | T | T | T |
| 0.6165587739662481 | 0.4322598810251032 | 0.4894280112562647  | T | T | T |
| 0.565573577745169  | 0.4717449199505137 | 0.7025250479096738  | T | T | T |
| 0.6707333040569330 | 0.4478741976258360 | 0.8585276431782763  | T | T | T |
| 0.9172056479127061 | 0.6812116646515459 | 0.8303566576321237  | T | T | T |
| 0.7678819092734773 | 0.6704203227338541 | 0.4644429202421086  | T | T | T |
| 0.6124515347091257 | 0.6744610430017685 | 0.4858437371431325  | T | T | T |
| 0.5577301435899459 | 0.6307281567680219 | 0.6986638283093368  | T | T | T |
| 0.6691781478073896 | 0.6771207843644376 | 0.8276031892029224  | T | T | T |
| 0.5777741114250058 | 0.9465603940163120 | 0.3583400154413910  | T | T | T |
| 0.6986325682335741 | 0.9750376775138758 | 0.2170436801198146  | T | T | T |
| 0.7192146098504328 | 0.9393337709308176 | 0.9935055739090093  | T | T | T |
| 0.8793423079842774 | 0.9371164357547993 | 0.9947089837704612  | T | T | T |
| 0.9305765227572853 | 0.9719736304765395 | 0.2054344852149814  | T | T | T |
| 0.8230085312360366 | 0.9478550621921847 | 0.3575006285117072  | T | T | T |
| 0.5778793601022900 | 0.1756565179611973 | 0.3295802205021674  | T | T | T |
| 0.6977542408788752 | 0.1332446314584462 | 0.1943284082591414  | T | T | T |
| 0.7314174426903578 | 0.1723100585739256 | 0.9720865427630748  | T | T | T |
| 0.8862299290809148 | 0.1754411207438166 | 0.9804708272626355  | T | T | T |
| 0.9357571124494606 | 0.1305445980344358 | 0.1955740871187309  | T | T | T |
| 0.8208089152984701 | 0.1764102922724052 | 0.3295922798882778  | T | T | T |
| 0.9221913186633915 | 0.0565336244861848 | 0.8548206933018092  | T | T | T |
| 0.8007543349439722 | 0.0278830052578146 | 0.7077388869349563  | T | T | T |
| 0.7819763113525428 | 0.0689069003676447 | 0.4907689761415399  | T | T | T |
| 0.6218145059999736 | 0.0716844404751861 | 0.4888284547997439  | T | T | T |
| 0.5687210520662032 | 0.0334907711627968 | 0.6975945173262186  | T | T | T |
| 0.6779899169590468 | 0.0550755586328564 | 0.8492248392641447  | T | T | T |
| 0.9236343406116979 | 0.8339191222730367 | 0.8362967349075793  | T | T | T |
| 0.8006080625734689 | 0.8712303277010819 | 0.6969648156481955  | T | T | T |
| 0.7689493841606785 | 0.8276913511539580 | 0.4803774977323742  | T | T | T |
| 0.6140898712860692 | 0.8283471711213003 | 0.4907481098334838  | T | T | T |
| 0.5629226078691379 | 0.8766339151633215 | 0.6975186811269336  | T | T | T |
| 0.6762767869700295 | 0.8353530438029330 | 0.8349148273611278  | T | T | T |
| 0.4214086767851726 | 0.4469460662696184 | 0.6334840364997404  | T | T | T |
| 0.3015161890480646 | 0.4711842550314843 | 0.7793101111480837  | T | T | T |
| 0.2822166484630915 | 0.4397755077535234 | -0.0000624930702689 | T | T | T |
| 0.1229746479641317 | 0.4376951080666946 | 0.0038075870896871  | T | T | T |
| 0.0629237233349034 | 0.4717049698972284 | 0.7933521583866194  | T | T | T |
| 0.1750773698525133 | 0.4418677425369625 | 0.6489757306547445  | T | T | T |
| 0.4169770649654294 | 0.6760735743884558 | 0.6488587001070378  | T | T | T |
| 0.2959154726030284 | 0.6302079581665575 | 0.7822912498747508  | T | T | T |

**Structure files (CONTCAR) involved in this work:**

|                    |                    |                     |   |   |   |
|--------------------|--------------------|---------------------|---|---|---|
| 0.2686635519545891 | 0.6747030568169283 | 0.0021145594142032  | T | T | T |
| 0.1148247859007010 | 0.6735163566298852 | -0.0002652138440268 | T | T | T |
| 0.0597104892685734 | 0.6311281135854486 | 0.7893080046395761  | T | T | T |
| 0.1722149788400448 | 0.6704045514414376 | 0.6507975304776892  | T | T | T |
| 0.0737818017476947 | 0.5598957661178645 | 0.1406710847938437  | T | T | T |
| 0.1994527558339466 | 0.5312643394035417 | 0.2717833448269664  | T | T | T |
| 0.2173929542106623 | 0.5614227413215417 | 0.5053104291444807  | T | T | T |
| 0.3759224443690224 | 0.5705995267659485 | 0.5018316275355392  | T | T | T |
| 0.4258543054669243 | 0.5302820293914905 | 0.2906587312274593  | T | T | T |
| 0.3252686705673558 | 0.5618904743283990 | 0.1338313225361053  | T | T | T |
| 0.0854579994074822 | 0.3266429285621928 | 0.1529594891758430  | T | T | T |
| 0.2007231529408544 | 0.3718876380529043 | 0.2908570703020325  | T | T | T |
| 0.2286618079520247 | 0.3323661803110459 | 0.5113521357397800  | T | T | T |
| 0.3845047905225509 | 0.3298955670162583 | 0.4993144511802468  | T | T | T |
| 0.4318467067378178 | 0.3725501422366078 | 0.2849328870114405  | T | T | T |
| 0.3191412267334084 | 0.3275275782369129 | 0.1562130663969758  | T | T | T |
| 0.9232799108050785 | 0.5312467474032312 | 0.1894294043511657  | T | T | T |
| 0.8235350337173457 | 0.3382750187914607 | 0.3278212676965404  | T | T | T |
| 0.7952926781569044 | 0.6387774307210532 | 0.6973910617243335  | T | T | T |
| 0.0062888382645260 | 0.5551468056484971 | 0.2041704012050694  | T | T | T |
| 0.3591471944791690 | 0.0692602287583389 | 0.7201751324287686  | T | T | T |
| 0.3163344404026678 | 0.0505595624584294 | 0.9039347673528041  | T | T | T |
| 0.2021331583166005 | 0.0466808026115619 | 0.0049081236587474  | T | T | T |
| 0.0916304531437085 | 0.0701851254109173 | 0.9006697368375102  | T | T | T |
| 0.1026596445980908 | 0.0673183915879671 | 0.7038305493633048  | T | T | T |
| 0.2293669665437552 | 0.0531529998660512 | 0.7564409936953035  | T | T | T |
| 0.3610095841757153 | 0.8267958330025237 | 0.7542682255982660  | T | T | T |
| 0.3013253505932719 | 0.8628960571505735 | 0.9200522034674880  | T | T | T |
| 0.1877002082118472 | 0.8573182847947700 | 0.0188139030631707  | T | T | T |
| 0.0868731279890766 | 0.8345468792481883 | 0.8946944214517379  | T | T | T |
| 0.1033620572507110 | 0.8424049034316227 | 0.6984303889361881  | T | T | T |
| 0.2293721276624779 | 0.8453089975449071 | 0.7561850938117826  | T | T | T |
| 0.3126455882804101 | 0.9498244985638670 | 0.7699797651776457  | T | T | T |
| 0.0891240985843875 | 0.9535758387764169 | 0.8058174401199927  | T | T | T |
| 0.4320153017028231 | 0.1308841015441183 | 0.5819025693944085  | T | T | T |
| 0.4132952646661970 | 0.9996850013515147 | 0.5693165162753208  | T | T | T |
| 0.3879981282957276 | 0.8684567895368909 | 0.5702434238390981  | T | T | T |
| 0.1946877394240898 | 0.1388756556116054 | 0.6137591224139481  | T | T | T |
| 0.1861298733596508 | 0.0060486067829100 | 0.5816987142735399  | T | T | T |
| 0.1985614896036421 | 0.8727996541478009 | 0.5655665453126874  | T | T | T |
| 0.9870715229889606 | 0.0395511027652120 | 0.7866692227229829  | T | T | T |
| 0.9855706882578107 | 0.8713847241461877 | 0.7793971692530589  | T | T | T |
| 0.1394738065625581 | 0.9308883971217996 | 0.2209325032714551  | T | T | T |
| 0.1820219494729514 | 0.9485845363929073 | 0.4055512039932165  | T | T | T |
| 0.2962481591049823 | 0.9545950156193901 | 0.5064086125701489  | T | T | T |
| 0.4064977344184779 | 0.9313829802610770 | 0.4014081792362496  | T | T | T |
| 0.3959357676757432 | 0.9369182030018633 | 0.2052536195285995  | T | T | T |
| 0.2692022083169043 | 0.9509924200556642 | 0.2586144895595071  | T | T | T |
| 0.1393467180959044 | 0.1755284363797907 | 0.2503449514358494  | T | T | T |
| 0.1961724075821387 | 0.1394665660532952 | 0.4181179172910146  | T | T | T |
| 0.3094834466581376 | 0.1515403507807791 | 0.5165037804123530  | T | T | T |
| 0.4117071860559196 | 0.1694661126277435 | 0.3930921210204426  | T | T | T |
| 0.3954505261315773 | 0.1574632291213188 | 0.1972928424808349  | T | T | T |

**Structure files (CONTCAR) involved in this work:**

|                    |                    |                    |   |   |   |
|--------------------|--------------------|--------------------|---|---|---|
| 0.2700366440385344 | 0.1500978950161329 | 0.2547420887171497 | T | T | T |
| 0.1815422664430388 | 0.0505720810734915 | 0.2727075952301363 | T | T | T |
| 0.4161078003428899 | 0.0490479695447434 | 0.3096297123402342 | T | T | T |
| 0.0643224920733925 | 0.8710149755187184 | 0.0844351484833532 | T | T | T |
| 0.0857655834034408 | 0.0013426990986985 | 0.0691315322758845 | T | T | T |
| 0.1099653768880296 | 0.1326984676325161 | 0.0684691991702440 | T | T | T |
| 0.3034635057268754 | 0.8645949097595539 | 0.1167326243229738 | T | T | T |
| 0.3120488457776688 | 0.9957772032697559 | 0.0819466682118448 | T | T | T |
| 0.3010429084722758 | 0.1277453502025535 | 0.0622966688190468 | T | T | T |
| 0.5126896770810101 | 0.9572000725255413 | 0.2878553638567001 | T | T | T |
| 0.5147731023843559 | 0.1366651289582106 | 0.2784575456612790 | T | T | T |
| 0.6341519460949456 | 0.5629225342715333 | 0.2717859866065147 | T | T | T |
| 0.7001393967303249 | 0.5753996060847665 | 0.1038251629314820 | T | T | T |
| 0.7904298709497007 | 0.5615266694897812 | 0.9550369992742321 | T | T | T |
| 0.8797272938821536 | 0.5778384855854707 | 0.1021260528942046 | T | T | T |
| 0.8873559342409928 | 0.5308619747009674 | 0.3154087397483357 | T | T | T |
| 0.7601454513582375 | 0.5250463570409044 | 0.2626031952350322 | T | T | T |
| 0.6415945121799299 | 0.3387204071435818 | 0.2693801832738612 | T | T | T |
| 0.6911830755259843 | 0.3342506093537246 | 0.0885026325410501 | T | T | T |
| 0.8061346720464865 | 0.3531508040795129 | 0.9917674418147258 | T | T | T |
| 0.9110220128711135 | 0.3213005825829359 | 0.1083281873611808 | T | T | T |
| 0.9095234591068057 | 0.3627334432373424 | 0.3014950087393458 | T | T | T |
| 0.7689898490338000 | 0.3718752116258717 | 0.2415591815530536 | T | T | T |
| 0.6702682084999245 | 0.4515239311889868 | 0.1739467397184396 | T | T | T |
| 0.9226368537083944 | 0.4487618523188114 | 0.1504160633453701 | T | T | T |
| 0.5677857763451422 | 0.6294084777814287 | 0.4101132306748560 | T | T | T |
| 0.5896550387004545 | 0.5002322500667926 | 0.4360816313044450 | T | T | T |
| 0.5807836007308212 | 0.3667397375310105 | 0.4419212290332900 | T | T | T |
| 0.8011773107966145 | 0.6312721152562857 | 0.3689940219086295 | T | T | T |
| 0.7950851746697606 | 0.5156088247783048 | 0.4567279874605491 | T | T | T |
| 0.8252244635691911 | 0.3878767346572899 | 0.4392988270710064 | T | T | T |
| 0.0217361380229072 | 0.3647551863750502 | 0.2018515107052885 | T | T | T |
| 0.8531763510192077 | 0.4364093810470775 | 0.7868804350334541 | T | T | T |
| 0.7883509074673373 | 0.4355746272628978 | 0.6147467394151938 | T | T | T |
| 0.6969173424496383 | 0.4254658409900024 | 0.4692317674472108 | T | T | T |
| 0.6019337926674195 | 0.4348774380490600 | 0.6081650461600051 | T | T | T |
| 0.5976523488147426 | 0.4436059961990191 | 0.8059431311285211 | T | T | T |
| 0.7239654741129489 | 0.4737453750609373 | 0.7746822957367622 | T | T | T |
| 0.8567824536695087 | 0.6847436706075378 | 0.7523898253406534 | T | T | T |
| 0.8114454603658005 | 0.6456800211751623 | 0.5633179844094542 | T | T | T |
| 0.6903597758960647 | 0.6486027468576572 | 0.4820695477683823 | T | T | T |
| 0.5835132638325186 | 0.6682716878518372 | 0.5979688098945674 | T | T | T |
| 0.5907492712691634 | 0.6665577668003179 | 0.7958685489605423 | T | T | T |
| 0.7152825235966065 | 0.6514720900190974 | 0.7362721970897369 | T | T | T |
| 0.8196391862503138 | 0.5512405315320452 | 0.6979190146199226 | T | T | T |
| 0.5783723932614376 | 0.5519371252539198 | 0.6928607475180040 | T | T | T |
| 0.9279717782522764 | 0.3805654914605081 | 0.9275857111641829 | T | T | T |
| 0.9113138624870395 | 0.5139412963229469 | 0.9281426149526463 | T | T | T |
| 0.8949130527491594 | 0.6448093395901007 | 0.9338815600634855 | T | T | T |
| 0.6908833758655265 | 0.3739643697297086 | 0.8984026247320306 | T | T | T |
| 0.6706753159249342 | 0.5028973970180702 | 0.9478065965288850 | T | T | T |
| 0.6823606411495543 | 0.6364983963823128 | 0.9313865215805870 | T | T | T |
| 0.4861871458854116 | 0.4550625017536505 | 0.7050986762664063 | T | T | T |

**Structure files (CONTCAR) involved in this work:**

|                    |                    |                    |   |   |   |
|--------------------|--------------------|--------------------|---|---|---|
| 0.4767943403512047 | 0.6370149968573050 | 0.7072073657943602 | T | T | T |
| 0.6431336225204578 | 0.9398529428998467 | 0.2879144181309014 | T | T | T |
| 0.7004905322695878 | 0.9356578287186514 | 0.1110661968945376 | T | T | T |
| 0.7995045253319045 | 0.9443035153102824 | 0.9764519528951252 | T | T | T |
| 0.8960973690847484 | 0.9318376069850033 | 0.1128928927677267 | T | T | T |
| 0.8977028050862385 | 0.9483421372068297 | 0.3105693528263855 | T | T | T |
| 0.7712788606796098 | 0.9685754464332621 | 0.2693582960519662 | T | T | T |
| 0.6403821322284509 | 0.1750835301998934 | 0.2529617074263988 | T | T | T |
| 0.6962383784264390 | 0.1571871817860317 | 0.0787509592694777 | T | T | T |
| 0.8092992078951337 | 0.1486870854888262 | 0.9770560997356755 | T | T | T |
| 0.9141665954900137 | 0.1685638966900893 | 0.0933974294362038 | T | T | T |
| 0.8972336997978890 | 0.1622671695045637 | 0.2910958297914242 | T | T | T |
| 0.7706695822614091 | 0.1472394192891992 | 0.2427965477022563 | T | T | T |
| 0.6798414249462336 | 0.0536126679190329 | 0.2009939656821948 | T | T | T |
| 0.9180661562712704 | 0.0513641251824555 | 0.1861016751558453 | T | T | T |
| 0.5687051725259967 | 0.8773557158686979 | 0.4218354920150623 | T | T | T |
| 0.5833406904223726 | 0.0089653791297479 | 0.4363199005413371 | T | T | T |
| 0.5985638998365397 | 0.1410729579634331 | 0.4353170078209029 | T | T | T |
| 0.8088533711222679 | 0.8726334570265430 | 0.3995370903813687 | T | T | T |
| 0.8181172255604127 | 0.0013880550560678 | 0.4485407107604298 | T | T | T |
| 0.8083604016061315 | 0.1352268131493934 | 0.4334857087484534 | T | T | T |
| 0.0096163816361174 | 0.9548711672391902 | 0.2144263864741434 | T | T | T |
| 0.0158271151817039 | 0.1393569853952680 | 0.2117131780736058 | T | T | T |
| 0.8568910997874146 | 0.0554849307280871 | 0.7839979767770257 | T | T | T |
| 0.8004240055188804 | 0.0752238876783146 | 0.6087902938352361 | T | T | T |
| 0.7016193496636284 | 0.0608388818534714 | 0.4757263838108802 | T | T | T |
| 0.6015275278965798 | 0.0764200454795569 | 0.6062030112839351 | T | T | T |
| 0.6028806336711229 | 0.0526830157870978 | 0.8037961852134586 | T | T | T |
| 0.7282149266887648 | 0.0306974370269898 | 0.7612156706788232 | T | T | T |
| 0.858072222274765  | 0.8393198421064717 | 0.7664642078284795 | T | T | T |
| 0.8021220310296022 | 0.8317664122879207 | 0.5907282354094020 | T | T | T |
| 0.6917041226768277 | 0.8529458348409076 | 0.4855086836764048 | T | T | T |
| 0.5884281478801064 | 0.8296687540681080 | 0.6056539153175586 | T | T | T |
| 0.6004989220253976 | 0.8538564465563088 | 0.7995647458782945 | T | T | T |
| 0.7278702523269738 | 0.8619333284847620 | 0.7491187472067807 | T | T | T |
| 0.8156079548308408 | 0.9503091188314108 | 0.6769663850147150 | T | T | T |
| 0.5797975120309765 | 0.9544124533149629 | 0.6713734685251506 | T | T | T |
| 0.9309049153389864 | 0.1309204383211462 | 0.9035750177454918 | T | T | T |
| 0.9159436450575450 | 1.0024212172706468 | 0.9457515662595438 | T | T | T |
| 0.9081697915889089 | 0.8693392046587535 | 0.9431808233038819 | T | T | T |
| 0.6938101645353858 | 0.1314621190288922 | 0.8836970249303944 | T | T | T |
| 0.6840153878778122 | 0.0055912418948887 | 0.9454480254052252 | T | T | T |
| 0.6913105884326627 | 0.8715444800393015 | 0.9411029390550635 | T | T | T |
| 0.4899214768275109 | 0.0502930663080216 | 0.7111821985491824 | T | T | T |
| 0.4828734835534835 | 0.8678213506940365 | 0.7122598337104636 | T | T | T |
| 0.3546424582764586 | 0.4393115768542129 | 0.7012395953737073 | T | T | T |
| 0.3092995244151678 | 0.4331234114099065 | 0.8859043930475389 | T | T | T |
| 0.2024100791840349 | 0.4549309229520621 | 0.0015547371914066 | T | T | T |
| 0.0938948631499820 | 0.4348443491027512 | 0.8906289301896133 | T | T | T |
| 0.0983963330565619 | 0.4433215528623525 | 0.6913237568842631 | T | T | T |
| 0.2255319701413205 | 0.4593738517629948 | 0.7400635977201475 | T | T | T |
| 0.3486830663040969 | 0.6696230664737103 | 0.7125939762546790 | T | T | T |
| 0.2993197351752312 | 0.6640909341639967 | 0.8915517641216796 | T | T | T |



**Structure files (CONTCAR) involved in this work:**

|                    |                    |                    |   |   |   |
|--------------------|--------------------|--------------------|---|---|---|
| 0.1920603229285112 | 0.6471255398686088 | 0.0055083772388864 | T | T | T |
| 0.0891130122440393 | 0.6718155390895408 | 0.8846810101607109 | T | T | T |
| 0.0953963802149882 | 0.6597406029150192 | 0.6880091126465504 | T | T | T |
| 0.2211815014523159 | 0.6385380390846684 | 0.7360036575000659 | T | T | T |
| 0.3153557088777225 | 0.5512122770641767 | 0.7907129794971752 | T | T | T |
| 0.0766907054998432 | 0.5516894002926264 | 0.8015427180843646 | T | T | T |
| 0.4306509025997972 | 0.3799674550235890 | 0.5654928159323931 | T | T | T |
| 0.4169058086698402 | 0.5114761459467118 | 0.5589864353428008 | T | T | T |
| 0.4040937413592043 | 0.6429729662746745 | 0.5390443790391672 | T | T | T |
| 0.1903409507296102 | 0.3671801474971880 | 0.6052439208311430 | T | T | T |
| 0.1830909666909451 | 0.4968713463896614 | 0.5596857905316202 | T | T | T |
| 0.1833167124354469 | 0.6306153215546434 | 0.5455199658638360 | T | T | T |
| 0.9828743778802782 | 0.4557899819671235 | 0.7840414086987055 | T | T | T |
| 0.9796377038621730 | 0.6401888837211902 | 0.7784905300350745 | T | T | T |
| 0.1376409202970175 | 0.5682301880633543 | 0.2165970603380418 | T | T | T |
| 0.2029301983159257 | 0.5564622333452576 | 0.3868373755160482 | T | T | T |
| 0.2970014104502123 | 0.5620295981997967 | 0.5289462919326480 | T | T | T |
| 0.3871906561593662 | 0.5669229853594133 | 0.3824785813750896 | T | T | T |
| 0.3986094339350530 | 0.5612254462683661 | 0.1859479622556854 | T | T | T |
| 0.2697068987186882 | 0.5495622155640439 | 0.2200315917078177 | T | T | T |
| 0.1450072348811560 | 0.3268413464156047 | 0.2351858281766248 | T | T | T |
| 0.1934905475355879 | 0.3598065279952629 | 0.4099250316528320 | T | T | T |
| 0.3069467363250434 | 0.3542155529452233 | 0.5098411234444798 | T | T | T |
| 0.4072955767546427 | 0.3311491862646926 | 0.3831093114099565 | T | T | T |
| 0.3969341854588790 | 0.3411938713530688 | 0.1853369850618898 | T | T | T |
| 0.2746888296290376 | 0.3501206911040158 | 0.2531517771173407 | T | T | T |
| 0.1868129523996408 | 0.4505604963524645 | 0.2661679459012748 | T | T | T |
| 0.4093418252660799 | 0.4504909421267409 | 0.2973098208024304 | T | T | T |
| 0.0691611959254728 | 0.6257519086032026 | 0.0688669998056790 | T | T | T |
| 0.0847042191761744 | 0.4940989307019344 | 0.0693112727457497 | T | T | T |
| 0.1105186536069053 | 0.3635795586878477 | 0.0514112870722297 | T | T | T |
| 0.3140808935229160 | 0.6346144324285999 | 0.0825790482429119 | T | T | T |
| 0.3213453917923654 | 0.5023482862254243 | 0.0512144038335308 | T | T | T |
| 0.2976690892222872 | 0.3699550012169501 | 0.0579488377824675 | T | T | T |
| 0.5055658942495997 | 0.5422660105897761 | 0.2949322645724640 | T | T | T |
| 0.5122407400795723 | 0.3663099255651537 | 0.2719464318332082 | T | T | T |
| 0.4368749899242876 | 0.7541670060913107 | 0.6334717367701039 | T | T | T |
| 0.1878309151676404 | 0.7493245112918561 | 0.6318194354551666 | T | T | T |
| 0.2713494843484941 | 0.7535083117862460 | 0.0288262607616088 | T | T | T |
| 0.1095731826353847 | 0.7497945083440096 | 0.0416497139994516 | T | T | T |
| 0.0661899183049586 | 0.2496146718431754 | 0.1268551853586494 | T | T | T |
| 0.3076835821854395 | 0.2488313836590652 | 0.1317613845887830 | T | T | T |
| 0.2207357390516049 | 0.2518699616116490 | 0.5199885202171248 | T | T | T |
| 0.3930744860973426 | 0.2542218341842200 | 0.5421208372214227 | T | T | T |
| 0.5566717261520843 | 0.2526286919609995 | 0.3528513929375076 | T | T | T |
| 0.8104397771561158 | 0.2547579524919454 | 0.3495932080639805 | T | T | T |
| 0.7257817833628905 | 0.2511728401436021 | 0.9433929074623572 | T | T | T |
| 0.8900524753610940 | 0.2533989920666131 | 0.9443672001980666 | T | T | T |
| 0.9435604493217610 | 0.7564822565977488 | 0.8577710587643337 | T | T | T |
| 0.6834895502900503 | 0.7555957057060350 | 0.8520255320016423 | T | T | T |
| 0.7739270096593791 | 0.7498445661738238 | 0.4440047679166775 | T | T | T |
| 0.6083523696254034 | 0.7519507788089752 | 0.4490810153846112 | T | T | T |
| 0.9249119970437627 | 0.4884138336730272 | 0.5377267311261396 | T | T | T |

**Structure files (CONTCAR) involved in this work:**

|                    |                    |                    |   |   |   |
|--------------------|--------------------|--------------------|---|---|---|
| 0.9274558723798361 | 0.4348260774188177 | 0.4087875686344130 | T | T | T |
| 0.8624253476271763 | 0.5587100949406791 | 0.5615067390320158 | T | T | T |
| 0.9469062372169248 | 0.4708458004656147 | 0.5975424363187385 | T | T | T |
| 0.0478021106266521 | 0.4450714455793787 | 0.4890329727202830 | T | T | T |
| 0.0729853434574047 | 0.4500751733464292 | 0.3567716387947077 | T | T | T |
| 0.0120346336428813 | 0.5662473814681186 | 0.4833508961058294 | T | T | T |
| 1.0139288885127278 | 0.5611807046777497 | 0.3455928797895552 | T | T | T |
| 0.0860028911285969 | 0.5725925598285859 | 0.4081866775451681 | T | T | T |
| 0.0459373768107830 | 0.4731724921695402 | 0.4188916050123140 | T | T | T |
| 0.0375761386182856 | 0.5461559874235197 | 0.4177260291607225 | T | T | T |

**Figure 4(a) Route(b-i)-Zn ④**

Si Al O Zn H C

1.0000000000000000

20.0219999999999985 0.0000000000000000 0.0000000000000000

0.0000000000000000 19.8990000000000009 0.0000000000000000

0.0000000000000000 0.0000000000000000 13.3829999999999991

93 3 193 2 6 2

Selective dynamics

Direct

|                    |                    |                    |   |   |   |
|--------------------|--------------------|--------------------|---|---|---|
| 0.4236800437183868 | 0.0609667688449994 | 0.6474292138183307 | T | T | T |
| 0.3057192263581507 | 0.0327731264830428 | 0.7904034484631641 | T | T | T |
| 0.2833749239418963 | 0.0549649093368184 | 0.0163976329220478 | T | T | T |
| 0.1243366414365826 | 0.0616828115763838 | 0.0122764029001488 | T | T | T |
| 0.0686562585427950 | 0.0323750504638049 | 0.7999458292786825 | T | T | T |
| 0.1810930371410572 | 0.0674362663228960 | 0.6648075776787874 | T | T | T |
| 0.4187862300980352 | 0.8281318360289590 | 0.6688528932292097 | T | T | T |
| 0.2999871865808323 | 0.8742224575376168 | 0.7971397255376746 | T | T | T |
| 0.2674381678941331 | 0.8316547044299247 | 0.0165958258497592 | T | T | T |
| 0.1116179785759485 | 0.8274182057360864 | 0.0111711041348216 | T | T | T |
| 0.0664417298237890 | 0.8756244118363321 | 0.7960154989894751 | T | T | T |
| 0.1784578034583756 | 0.8290675011530289 | 0.6607766368977077 | T | T | T |
| 0.0759688335986975 | 0.9404741422383770 | 0.1495048815076964 | T | T | T |
| 0.1961524431563915 | 0.9699711650250110 | 0.2889270443027546 | T | T | T |
| 0.2167186076271190 | 0.9456747350792625 | 0.5160271184232713 | T | T | T |
| 0.3770489763753057 | 0.9364378216931447 | 0.5136924657454877 | T | T | T |
| 0.4338193865143336 | 0.9682764012079685 | 0.3012134485698837 | T | T | T |
| 0.3212665285887449 | 0.9339405561500875 | 0.1641689277245856 | T | T | T |
| 0.0833663990857149 | 0.1715924586947031 | 0.1660098881084430 | T | T | T |
| 0.2001740911462280 | 0.1281452592385121 | 0.2983455770416392 | T | T | T |
| 0.2324518524037983 | 0.1698373617164925 | 0.5153803717959253 | T | T | T |
| 0.3888380738582107 | 0.1746866666592796 | 0.5070065918359880 | T | T | T |
| 0.4355901326744319 | 0.1267015843700998 | 0.2928979792853001 | T | T | T |
| 0.3199834766381313 | 0.1728806031485249 | 0.1622937508311650 | T | T | T |
| 0.5776298510643180 | 0.5557529927259606 | 0.3548982829493471 | T | T | T |
| 0.6937253392810040 | 0.5252293590774761 | 0.2053308537139562 | T | T | T |
| 0.7152275038980306 | 0.5674240233516110 | 0.9882032329326199 | T | T | T |
| 0.8741905744113099 | 0.5729055170627196 | 0.9841665321437080 | T | T | T |
| 0.8131745185471160 | 0.5515904647792771 | 0.3458958158018833 | T | T | T |
| 0.5748244203367635 | 0.3281859085985518 | 0.3328893530200684 | T | T | T |
| 0.6948883876701528 | 0.3716759731351025 | 0.1931941388875106 | T | T | T |
| 0.7309204053597512 | 0.3269989695991423 | 0.9803280861239543 | T | T | T |
| 0.8859169276177155 | 0.3257917989109379 | 0.9935073672225097 | T | T | T |

**Structure files (CONTCAR) involved in this work:**

|                    |                    |                    |   |   |   |
|--------------------|--------------------|--------------------|---|---|---|
| 0.9426616072821663 | 0.3724278265191643 | 0.1939034220132283 | T | T | T |
| 0.9189573693850112 | 0.4446275411806258 | 0.8584715084563878 | T | T | T |
| 0.7986232003092119 | 0.4722636685214576 | 0.7202352940581394 | T | T | T |
| 0.7755732419868789 | 0.4358533111663290 | 0.4948458225681894 | T | T | T |
| 0.6171815524905836 | 0.4299895346665193 | 0.4904251546299163 | T | T | T |
| 0.5683811859245048 | 0.4690383738378875 | 0.7042678185750344 | T | T | T |
| 0.6755892066609790 | 0.4470453551163463 | 0.8583161763851992 | T | T | T |
| 0.9199562572188993 | 0.6788560603300526 | 0.8277662398122601 | T | T | T |
| 0.7672840532873627 | 0.6684937958446934 | 0.4676301562334014 | T | T | T |
| 0.6124310701596455 | 0.6730901130643299 | 0.4894785778756088 | T | T | T |
| 0.5587013049252270 | 0.6276974765101333 | 0.7002506922192908 | T | T | T |
| 0.6720108517917048 | 0.6728921714112056 | 0.8288461578767745 | T | T | T |
| 0.5786669472547662 | 0.9445236216017372 | 0.3589369478039465 | T | T | T |
| 0.6985389522645662 | 0.9723086362474379 | 0.2152265050769842 | T | T | T |
| 0.7204260809011347 | 0.9365259746397755 | 0.9934889008370283 | T | T | T |
| 0.8803230892879773 | 0.9340501224091536 | 0.9948426148881225 | T | T | T |
| 0.9309129207923637 | 0.9706101351820690 | 0.2054251297666265 | T | T | T |
| 0.8222737570930522 | 0.9460348331146772 | 0.3564186442126422 | T | T | T |
| 0.5782473746890795 | 0.1728880779946930 | 0.3303228602764340 | T | T | T |
| 0.6989276964039746 | 0.1296740273449526 | 0.1957628081239943 | T | T | T |
| 0.7325005941357561 | 0.1709851847259478 | 0.9742543480315723 | T | T | T |
| 0.8870330132197591 | 0.1733947319953959 | 0.9825514163029827 | T | T | T |
| 0.9362507535303407 | 0.1287148317165778 | 0.1963773110400489 | T | T | T |
| 0.8214150097083954 | 0.1720507873346627 | 0.3309687641712430 | T | T | T |
| 0.9237502066084088 | 0.0542383913486821 | 0.8559835393496898 | T | T | T |
| 0.8016692628383454 | 0.0262660169962859 | 0.7107249676962369 | T | T | T |
| 0.7824562871416900 | 0.0663868906340301 | 0.4925032156080327 | T | T | T |
| 0.6220152696538227 | 0.0699034363177828 | 0.4904442052936900 | T | T | T |
| 0.5692269061325465 | 0.0316675825962673 | 0.6995374048782553 | T | T | T |
| 0.6782420816296283 | 0.0531034568122919 | 0.8518008722977028 | T | T | T |
| 0.9241689713040347 | 0.8312625239348211 | 0.8369524679606745 | T | T | T |
| 0.8023108553531156 | 0.8688623364126895 | 0.6965424032589446 | T | T | T |
| 0.7695953842990196 | 0.8262822225795853 | 0.4794872648787698 | T | T | T |
| 0.6147190120939917 | 0.8266201735197233 | 0.4913747537668934 | T | T | T |
| 0.5639778377592646 | 0.8744968699430374 | 0.6992666084727289 | T | T | T |
| 0.6784080644865019 | 0.8316676988700920 | 0.8340339915697353 | T | T | T |
| 0.4235480907860631 | 0.4427030943247490 | 0.6441429001335417 | T | T | T |
| 0.3032227487271267 | 0.4694800862658430 | 0.7849796630053458 | T | T | T |
| 0.2803545817055875 | 0.4459778909320418 | 0.0117895376646162 | T | T | T |
| 0.1213940392685423 | 0.4373871685348256 | 0.0128703099909812 | T | T | T |
| 0.0629467535111535 | 0.4690054188597246 | 0.7984635323136527 | T | T | T |
| 0.1769734161318028 | 0.4343881059763847 | 0.6609052065415975 | T | T | T |
| 0.4154223293107903 | 0.6742651840629797 | 0.6635058952132576 | T | T | T |
| 0.2977055161199194 | 0.6283336105327885 | 0.7944386940430921 | T | T | T |
| 0.2679657793538984 | 0.6702922874467009 | 0.0127096516361938 | T | T | T |
| 0.1122631273665424 | 0.6732445841902028 | 0.0025722745477397 | T | T | T |
| 0.0616438818057627 | 0.6282435244544274 | 0.7886670576861474 | T | T | T |
| 0.1776566101764890 | 0.6722362995094726 | 0.6594608491990906 | T | T | T |
| 0.0794172037589011 | 0.5609040548548164 | 0.1465343592953925 | T | T | T |
| 0.1975947670783955 | 0.5304439126810385 | 0.2870148434053590 | T | T | T |
| 0.2176263407085606 | 0.5552311796580690 | 0.5158969095851930 | T | T | T |
| 0.3768812298830337 | 0.5658390604114982 | 0.5113983012341830 | T | T | T |
| 0.4317499458508464 | 0.5322478057332988 | 0.2981191385820570 | T | T | T |

**Structure files (CONTCAR) involved in this work:**

|                    |                    |                    |   |   |   |
|--------------------|--------------------|--------------------|---|---|---|
| 0.3213673668897132 | 0.5659922985252747 | 0.1583653354504530 | T | T | T |
| 0.0865240763895591 | 0.3244763470040392 | 0.1607429680450273 | T | T | T |
| 0.2012284116985023 | 0.3725566305832989 | 0.2945768780249029 | T | T | T |
| 0.2303879172560961 | 0.3309784851135802 | 0.5132644051748945 | T | T | T |
| 0.3864621532679665 | 0.3285909831385395 | 0.5035420965914513 | T | T | T |
| 0.4331087728023997 | 0.3742732063694464 | 0.2893699095340882 | T | T | T |
| 0.3199464650993534 | 0.3299112273678919 | 0.1582830506813138 | T | T | T |
| 0.9227891516558646 | 0.5302896009109013 | 0.1962860533724845 | T | T | T |
| 0.8214015986245220 | 0.3334787796904099 | 0.3268132199420642 | T | T | T |
| 0.7982814289712860 | 0.6353262326826951 | 0.6957823766406283 | T | T | T |
| 0.0110687239222843 | 0.5582994770417828 | 0.2211639550225374 | T | T | T |
| 0.3606161158337376 | 0.0714759647510159 | 0.7222705022602384 | T | T | T |
| 0.3181723605461561 | 0.0509524564425595 | 0.9069503191587583 | T | T | T |
| 0.2033761900502185 | 0.0449062671065813 | 0.0056039063751637 | T | T | T |
| 0.0929655513082377 | 0.0693344272482498 | 0.9016001160338943 | T | T | T |
| 0.1045325970488844 | 0.0677194455530099 | 0.7045560940628730 | T | T | T |
| 0.2308293588439758 | 0.0567079851931653 | 0.7598821102332844 | T | T | T |
| 0.3601117401638244 | 0.8288941777190322 | 0.7526023319610583 | T | T | T |
| 0.2987692947912338 | 0.8655256903956904 | 0.9171228348709001 | T | T | T |
| 0.1888182321646143 | 0.8514580853528054 | 0.0240963078371016 | T | T | T |
| 0.0892174875891971 | 0.8351505998016138 | 0.8957267039485751 | T | T | T |
| 0.1021285438677469 | 0.8411529909014951 | 0.6992071318241618 | T | T | T |
| 0.2287976298661788 | 0.8495344837076164 | 0.7515240187283022 | T | T | T |
| 0.3133704642490004 | 0.9524703533301724 | 0.7690646424717744 | T | T | T |
| 0.0902589001845014 | 0.9534342269824911 | 0.8048199839335557 | T | T | T |
| 0.4339421559578641 | 0.1282188499151360 | 0.5801368654448597 | T | T | T |
| 0.4125838225083672 | 0.9974153239243166 | 0.5734561951055287 | T | T | T |
| 0.3928725935779135 | 0.8654626223880041 | 0.5682292877202606 | T | T | T |
| 0.1962752822495645 | 0.1399577002044401 | 0.6140668581721546 | T | T | T |
| 0.1904135661148468 | 0.0067564488130934 | 0.5852824208052273 | T | T | T |
| 0.1934766339756069 | 0.8736207970761261 | 0.5617312058547568 | T | T | T |
| 0.9885903666848654 | 0.0399838207919689 | 0.7861733519824664 | T | T | T |
| 0.9858197568499014 | 0.8717394966176618 | 0.7839024942151489 | T | T | T |
| 0.1398133990342544 | 0.9315878191040206 | 0.2231723534670025 | T | T | T |
| 0.1838656406959053 | 0.9535217508027205 | 0.4058953158925749 | T | T | T |
| 0.2972954321872096 | 0.9493569534316053 | 0.5088479591986125 | T | T | T |
| 0.4072288488021490 | 0.9320633186087536 | 0.4020670100485888 | T | T | T |
| 0.3973922888014684 | 0.9339481488699559 | 0.2054607093828086 | T | T | T |
| 0.2702285688114893 | 0.9439285711624821 | 0.2579688542350737 | T | T | T |
| 0.1392726795510673 | 0.1723104465006834 | 0.2538679179039082 | T | T | T |
| 0.1986169334533330 | 0.1344279980288506 | 0.4187217073861720 | T | T | T |
| 0.3113255007597590 | 0.1509241289706136 | 0.5168158887128769 | T | T | T |
| 0.4130703703424348 | 0.1679130559571144 | 0.3921031922562311 | T | T | T |
| 0.3967442163703748 | 0.1581584052837424 | 0.1964577083323960 | T | T | T |
| 0.2714083944903121 | 0.1560339605620711 | 0.2570098818424119 | T | T | T |
| 0.1902596570132245 | 0.0501000421928866 | 0.2656042495192267 | T | T | T |
| 0.4155524715949424 | 0.0479926625525632 | 0.3055843672348336 | T | T | T |
| 0.0652733960016522 | 0.8715325018540085 | 0.0857800513836630 | T | T | T |
| 0.0863762537918356 | 0.0015570197271345 | 0.0708799107996958 | T | T | T |
| 0.1125308212993815 | 0.1322301600069371 | 0.0694257458361834 | T | T | T |
| 0.3069979962456753 | 0.8614621228888275 | 0.1123660375481360 | T | T | T |
| 0.3128344021495555 | 0.9947504708385166 | 0.0846411500843773 | T | T | T |
| 0.3002567412163216 | 0.1275581233979061 | 0.0658629762838049 | T | T | T |

**Structure files (CONTCAR) involved in this work:**

|                    |                    |                    |   |   |   |
|--------------------|--------------------|--------------------|---|---|---|
| 0.5135378688245018 | 0.9567403347127394 | 0.2890079666565850 | T | T | T |
| 0.5157851081133669 | 0.1339558566835217 | 0.2769825304255033 | T | T | T |
| 0.6415781614483923 | 0.5606251279075281 | 0.2815785818504437 | T | T | T |
| 0.7017803044721069 | 0.5729965969660186 | 0.1078429003221132 | T | T | T |
| 0.7944978562377440 | 0.5612389536437912 | 0.9628284602920988 | T | T | T |
| 0.8904561121683151 | 0.5776457271330676 | 0.1011414807683726 | T | T | T |
| 0.8904007849671973 | 0.5436310569735312 | 0.3157676641491745 | T | T | T |
| 0.7658716918020237 | 0.5196258667049726 | 0.2613644410380745 | T | T | T |
| 0.6411879076755252 | 0.3344157494960252 | 0.2658242262144225 | T | T | T |
| 0.6904981232526581 | 0.3349709799963422 | 0.0844007714243638 | T | T | T |
| 0.8084108528768246 | 0.3508884559396767 | 0.9941841472223389 | T | T | T |
| 0.9150210665476060 | 0.3219901073288265 | 0.1067168728662618 | T | T | T |
| 0.9066921246936894 | 0.3537641297698135 | 0.3003657430847059 | T | T | T |
| 0.7684968564237388 | 0.3680037691246776 | 0.2391219239000703 | T | T | T |
| 0.6700378413406882 | 0.4497360311889853 | 0.1777553347372134 | T | T | T |
| 0.9300059775014103 | 0.4484687828256324 | 0.1610642785405316 | T | T | T |
| 0.5693806799893326 | 0.6267728177934697 | 0.4133041394826615 | T | T | T |
| 0.5855415977689404 | 0.4962523257487206 | 0.4375973093458241 | T | T | T |
| 0.5849869689283148 | 0.3625368867775045 | 0.4426985099202707 | T | T | T |
| 0.7943511759100413 | 0.6297571851656009 | 0.3684239306790628 | T | T | T |
| 0.8008670555559523 | 0.5121569539348930 | 0.4557524367452870 | T | T | T |
| 0.8210833963719950 | 0.3800457097803232 | 0.4410273837264877 | T | T | T |
| 0.0227660334007676 | 0.3608647796453436 | 0.2108304886040691 | T | T | T |
| 0.8536429310316094 | 0.4333621275876270 | 0.7875253090644524 | T | T | T |
| 0.7903106974812745 | 0.4335458919982153 | 0.6137718800152373 | T | T | T |
| 0.6973254886788665 | 0.4288660401006119 | 0.4690734533660453 | T | T | T |
| 0.6028686456829623 | 0.4309529941246272 | 0.6094537369362163 | T | T | T |
| 0.6018845346355493 | 0.4436369207398531 | 0.8080047613642231 | T | T | T |
| 0.7267600839211060 | 0.4751863850190189 | 0.7734353979562866 | T | T | T |
| 0.8586181761529998 | 0.6826414603247618 | 0.7519809830989346 | T | T | T |
| 0.8135523674573246 | 0.6428625355595944 | 0.5624841636390883 | T | T | T |
| 0.6901757543388212 | 0.6478998787457990 | 0.4911969809272359 | T | T | T |
| 0.5814493473473638 | 0.6681409599635550 | 0.6005585575262847 | T | T | T |
| 0.5935638732695466 | 0.6611128831345848 | 0.7977990108614652 | T | T | T |
| 0.7186778594259524 | 0.6472301896112493 | 0.7383599064369080 | T | T | T |
| 0.8247089508104486 | 0.5487376447344195 | 0.6965822514600988 | T | T | T |
| 0.5794415725291946 | 0.5491791689894375 | 0.6891734465641596 | T | T | T |
| 0.9298491684542495 | 0.3774125909652061 | 0.9254128547006630 | T | T | T |
| 0.9129631531511688 | 0.5101877757001175 | 0.9292978783886318 | T | T | T |
| 0.8999833433917864 | 0.6419548366589073 | 0.9319111223445242 | T | T | T |
| 0.6965610447559916 | 0.3723045700155431 | 0.8935101577499613 | T | T | T |
| 0.6766449806743295 | 0.4995520130448365 | 0.9509196497875079 | T | T | T |
| 0.6853271569633080 | 0.6334571134287775 | 0.9337978177200046 | T | T | T |
| 0.4896127153329145 | 0.4504869147348166 | 0.7127045767113612 | T | T | T |
| 0.4778507889843442 | 0.6334151155506103 | 0.7117681030585140 | T | T | T |
| 0.6435790240837769 | 0.9376277450384447 | 0.2875950411482369 | T | T | T |
| 0.7008204487149609 | 0.9311595311923804 | 0.1106785915243982 | T | T | T |
| 0.8006945272148184 | 0.9445525735623559 | 0.9783175926232908 | T | T | T |
| 0.8981230293370108 | 0.9291521665574961 | 0.1127927257683296 | T | T | T |
| 0.8973574327700966 | 0.9478623118956827 | 0.3105220773448253 | T | T | T |
| 0.7712965008906228 | 0.9677145613888851 | 0.2678226060318666 | T | T | T |
| 0.6423900192786821 | 0.1709987868792147 | 0.2569985625046284 | T | T | T |
| 0.6985100733705473 | 0.1580187747447813 | 0.0823627861935267 | T | T | T |

**Structure files (CONTCAR) involved in this work:**

|                    |                    |                    |   |   |   |
|--------------------|--------------------|--------------------|---|---|---|
| 0.8101965873645718 | 0.1466136324830089 | 0.9777538794803997 | T | T | T |
| 0.9137367739670801 | 0.1685525719332674 | 0.0963289705961919 | T | T | T |
| 0.8983589585963005 | 0.1591019271441417 | 0.2932410450159975 | T | T | T |
| 0.7720062564437343 | 0.1390528798498410 | 0.2460001244051636 | T | T | T |
| 0.6789485948880059 | 0.0503336485924760 | 0.1955618023081372 | T | T | T |
| 0.9183842018026913 | 0.0496703807166599 | 0.1836043258402419 | T | T | T |
| 0.5692647102750655 | 0.8749721139756921 | 0.4213653815738931 | T | T | T |
| 0.5853428437254169 | 0.0059456243545127 | 0.4383573213520708 | T | T | T |
| 0.5962250040811105 | 0.1384982026292730 | 0.4372920971224710 | T | T | T |
| 0.8081460822794483 | 0.8700057534730895 | 0.3954100533952167 | T | T | T |
| 0.8161361099356031 | 0.9975961229119398 | 0.4498035421554839 | T | T | T |
| 0.8115012626873283 | 0.1318418242841614 | 0.4363028911902744 | T | T | T |
| 0.0100752838679096 | 0.9541401695036761 | 0.2163192437869801 | T | T | T |
| 0.0165854856921534 | 0.1367164170575222 | 0.2107487550987466 | T | T | T |
| 0.8580080093338081 | 0.0549277537039310 | 0.7859941108570921 | T | T | T |
| 0.8009924897583469 | 0.0720725266326167 | 0.6104429665400315 | T | T | T |
| 0.7019730007854571 | 0.0614711732398669 | 0.4767012029728814 | T | T | T |
| 0.6021194951507359 | 0.0742196609283321 | 0.6079550480573104 | T | T | T |
| 0.6033429728007593 | 0.0511082065303952 | 0.8055854666279216 | T | T | T |
| 0.7291196235962890 | 0.0297729221998498 | 0.7640187781788912 | T | T | T |
| 0.8597317173460103 | 0.8355381629617153 | 0.7648019086871478 | T | T | T |
| 0.8051121652419732 | 0.8328367255175931 | 0.5878855914568762 | T | T | T |
| 0.6923017020417125 | 0.8514649240348797 | 0.4866128802494153 | T | T | T |
| 0.5887515720515434 | 0.8284328222976444 | 0.6061086305873867 | T | T | T |
| 0.6026021244737134 | 0.8514580953776647 | 0.8003231329904745 | T | T | T |
| 0.7292568855427392 | 0.8569938861147308 | 0.7464267122844680 | T | T | T |
| 0.8169888877145887 | 0.9484751251103629 | 0.6824029941019482 | T | T | T |
| 0.5799994972883243 | 0.9525285261433917 | 0.6738752657494312 | T | T | T |
| 0.9325364137244300 | 0.1273018988551946 | 0.9089210903298918 | T | T | T |
| 0.9190979029663592 | 0.9970012900267089 | 0.9429238168104043 | T | T | T |
| 0.9057147958866461 | 0.8643362405976801 | 0.9445615251973560 | T | T | T |
| 0.6935128873497388 | 0.1291059078551715 | 0.8883621954005826 | T | T | T |
| 0.6835905263408127 | 0.0021771394026545 | 0.9464511618362168 | T | T | T |
| 0.6956174666004407 | 0.8682397232298967 | 0.9392101517938020 | T | T | T |
| 0.4904620246684844 | 0.0486792720573503 | 0.7128917115409769 | T | T | T |
| 0.4841156916797911 | 0.8648203300578626 | 0.7157565812255174 | T | T | T |
| 0.3589337943260766 | 0.4324404135243574 | 0.7163500830530111 | T | T | T |
| 0.3132170662605618 | 0.4490174414720960 | 0.9011544988970011 | T | T | T |
| 0.1998274588096732 | 0.4576878932598556 | 0.0065006544855327 | T | T | T |
| 0.0884982539516153 | 0.4369494253696140 | 0.9029043930807154 | T | T | T |
| 0.1010654540926952 | 0.4339852227259415 | 0.7043646151128279 | T | T | T |
| 0.2284776570338643 | 0.4458669953750123 | 0.7532111931247574 | T | T | T |
| 0.3542805503168942 | 0.6746492672677421 | 0.7431087899955126 | T | T | T |
| 0.3021887432599122 | 0.6381032833872828 | 0.9141178111652577 | T | T | T |
| 0.1894375430440044 | 0.6487827771564557 | 0.0133628016251749 | T | T | T |
| 0.0874810508071571 | 0.6674024385427495 | 0.8882138497687361 | T | T | T |
| 0.1002795871128853 | 0.6586313284112286 | 0.6912809182776867 | T | T | T |
| 0.2242467515716827 | 0.6510525947798529 | 0.7545853232876378 | T | T | T |
| 0.3109857426313178 | 0.5499886777330695 | 0.7669697386284761 | T | T | T |
| 0.0795041919939188 | 0.5488557414274085 | 0.7989048228187587 | T | T | T |
| 0.4322620471967032 | 0.3776254480383552 | 0.5719193722396182 | T | T | T |
| 0.4169648905032021 | 0.5090238474588070 | 0.5739912339206266 | T | T | T |
| 0.3899736139027045 | 0.6392388494624428 | 0.5603096889420839 | T | T | T |

**Structure files (CONTCAR) involved in this work:**

|                     |                    |                    |   |   |   |
|---------------------|--------------------|--------------------|---|---|---|
| 0.1916013143308032  | 0.3620952070681300 | 0.6092427093379180 | T | T | T |
| 0.1841087215561109  | 0.4952321476785431 | 0.5805084703987732 | T | T | T |
| 0.1969736488373717  | 0.6280283957529410 | 0.5612375676927693 | T | T | T |
| 0.9834036941598608  | 0.4546204695624602 | 0.7838669339104178 | T | T | T |
| 0.9820301785064171  | 0.6379023113453451 | 0.7742491132104615 | T | T | T |
| 0.1415061944089103  | 0.5715805473181410 | 0.2222768827266054 | T | T | T |
| 0.1872728435696090  | 0.5499280764776172 | 0.4033034170153605 | T | T | T |
| 0.2979005567009202  | 0.5466512948237036 | 0.5133155867798223 | T | T | T |
| 0.4034681487016892  | 0.5690816901448025 | 0.3976087003159552 | T | T | T |
| 0.3973030926261938  | 0.5661350939291673 | 0.2001109953253362 | T | T | T |
| 0.2715579239398763  | 0.5532583805535402 | 0.2530869846120323 | T | T | T |
| 0.1464158573277664  | 0.3246577563671038 | 0.2425325646286655 | T | T | T |
| 0.1969616172732248  | 0.3643132199444133 | 0.4144372555889357 | T | T | T |
| 0.3088355798907189  | 0.3517779256462819 | 0.5166611668805273 | T | T | T |
| 0.4077197690557722  | 0.3325367244550785 | 0.3867657465334614 | T | T | T |
| 0.3971636107436876  | 0.3451952651294358 | 0.1888962102012171 | T | T | T |
| 0.2749481830564688  | 0.3511726374764249 | 0.2552701705053451 | T | T | T |
| 0.1857108775051987  | 0.4508929406936254 | 0.2660767192702155 | T | T | T |
| 0.4130180765961015  | 0.4528493685066657 | 0.3040354673202494 | T | T | T |
| 0.0676347483270145  | 0.6247560424455687 | 0.0747333585186999 | T | T | T |
| 0.0825225702728468  | 0.4923899481977434 | 0.0833042108240052 | T | T | T |
| 0.1117635283967395  | 0.3633870573453890 | 0.0603808402128674 | T | T | T |
| 0.3048593792405115  | 0.6388804898482522 | 0.1099335729759967 | T | T | T |
| 0.3123785787505807  | 0.5063353961237300 | 0.0772178822263640 | T | T | T |
| 0.2972132513725672  | 0.3733877316620809 | 0.0611234611006592 | T | T | T |
| 0.5115960975302509  | 0.5425453853167860 | 0.2876922664731227 | T | T | T |
| 0.5131328391935955  | 0.3657012383120422 | 0.2757846918397373 | T | T | T |
| 0.4364964648970562  | 0.7511025155084390 | 0.6393364399180287 | T | T | T |
| 0.1885273379317336  | 0.7505861522088340 | 0.6304949908000630 | T | T | T |
| 0.2763093522556377  | 0.7508676249908078 | 0.0137551008777765 | T | T | T |
| 0.1036238335724226  | 0.7491575362069576 | 0.0432208793080969 | T | T | T |
| 0.0686605291602024  | 0.2479884144265446 | 0.1302064918527603 | T | T | T |
| 0.3109433702545883  | 0.2511747650557648 | 0.1305049132965050 | T | T | T |
| 0.2213290903835444  | 0.2503777705521412 | 0.5121069552564339 | T | T | T |
| 0.3965238595603945  | 0.2521947346531497 | 0.5425021799493723 | T | T | T |
| 0.5565827747549134  | 0.2499673954906831 | 0.3517748502485806 | T | T | T |
| 0.8070112772089738  | 0.2498397118224086 | 0.3475290248168132 | T | T | T |
| 0.7275428089565581  | 0.2495215377490287 | 0.9434870571124581 | T | T | T |
| 0.8915482199474364  | 0.2509559215773950 | 0.9451185942174768 | T | T | T |
| 0.9465714087905045  | 0.7541036310870950 | 0.8556709375722807 | T | T | T |
| 0.6845340874786694  | 0.7519449443528122 | 0.8519234997895943 | T | T | T |
| 0.7740383236655416  | 0.7479600827866735 | 0.4463153232648170 | T | T | T |
| 0.6085022330720312  | 0.7501187250488465 | 0.4504068240705491 | T | T | T |
| 0.9368471779955023  | 0.4878990691770002 | 0.5343281244128419 | T | T | T |
| 0.9325075571728361  | 0.4033244469933792 | 0.4417651333212921 | T | T | T |
| 0.8709421257717272  | 0.5556633650901917 | 0.5601960600130981 | T | T | T |
| 0.9612095475453178  | 0.4752313051461665 | 0.5952135266043646 | T | T | T |
| -0.0141226666383906 | 0.5835438373965255 | 0.4616918331307684 | T | T | T |
| 0.0750666257967605  | 0.5677477663586660 | 0.4363963805947593 | T | T | T |
| -0.0009598846729195 | 0.7014678885978372 | 0.4007096201581173 | T | T | T |
| 0.0168482522575713  | 0.5832441817149761 | 0.2859785153099128 | T | T | T |
| 0.0888367442058213  | 0.6845304424163683 | 0.3744061133318207 | T | T | T |
| 0.0332606389755839  | 0.6028773010403221 | 0.4338332257715322 | T | T | T |

**Structure files (CONTCAR) involved in this work:**

0.0406101140711404 0.6659022995462590 0.4007623016908738 T T T

**Figure 4(a) Route(b-ii)-Zn ① as same as Route(a)-Zn ①****Figure 4(a) Route(b-ii)-Zn ②**

Si Al O Zn H C

1.0000000000000000

20.0219999999999985 0.0000000000000000 0.0000000000000000

0.0000000000000000 19.8990000000000009 0.0000000000000000

0.0000000000000000 0.0000000000000000 13.3829999999999991

93 3 193 2 6 2

Selective dynamics

Direct

0.4221703160734269 0.0602280796646796 0.6482828235018778 T T T

0.3048429578618740 0.0319975010462721 0.7922671240107377 T T T

0.2819691633065966 0.0564279624667406 0.0169253832447207 T T T

0.1225792692502936 0.0622015814358209 0.0114850536415256 T T T

0.0677097711791388 0.0313823816107129 0.8002654958327660 T T T

0.1802067203140636 0.0647177826321175 0.6646497847064416 T T T

0.4184940851270258 0.8274309751470993 0.6688904792907897 T T T

0.3008212927123305 0.8730118786949019 0.8011650976966868 T T T

0.2669399697612808 0.8303467719571483 0.0204686682969439 T T T

0.1109306132181895 0.8265774811690954 0.0129598579239192 T T T

0.0659153830304979 0.8747216902352392 0.7986002517934114 T T T

0.1791282716721615 0.8289132980614362 0.6651361490506053 T T T

0.0754782958033817 0.9408290464024455 0.1487024408993690 T T T

0.1945205844147246 0.9699858679208656 0.2904245112862594 T T T

0.2164743064083894 0.9435223540784345 0.5159992483509931 T T T

0.3768335609360099 0.9355717164797615 0.5135670440621153 T T T

0.4331627531986616 0.9686698401649704 0.3014620039269856 T T T

0.3199633540663861 0.9356790523263609 0.1643163670641654 T T T

0.0816659731678050 0.1720655885789327 0.1666117223964955 T T T

0.1976999509433803 0.1286958892892221 0.3018470524220334 T T T

0.2314940029243025 0.1694180338454297 0.5191768949489215 T T T

0.3868817219615357 0.1738483277213756 0.5088573720646576 T T T

0.4348773378638493 0.1270446693073366 0.2955941514552319 T T T

0.3183749888448623 0.1723229114838306 0.1666704415025755 T T T

0.5785018138634577 0.5555562476890942 0.3566512023473331 T T T

0.6910201540450669 0.5272943500381632 0.2029749790398618 T T T

0.7155488087935010 0.5685499674015901 0.9866047570380989 T T T

0.8745700857622757 0.5733574918420646 0.9862321299257958 T T T

0.8108796769795247 0.5514721103629420 0.3460900318310240 T T T

0.5727136509029652 0.3292133853901600 0.3324028034929388 T T T

0.6935115931815091 0.3733386305152100 0.1941772166896842 T T T

0.7317032489523980 0.3278894433580349 0.9801473006610167 T T T

0.8866292406525796 0.3254711351496390 0.9891153322755326 T T T

0.9424129034182550 0.3717817213868091 0.1889910597988016 T T T

0.9201596819234206 0.4464116120829681 0.8597580260849471 T T T

0.7998734464829815 0.4744913398830554 0.7198458751737145 T T T

0.7787195708603158 0.4367007142168954 0.4959452583699141 T T T

0.6214077916264865 0.4283740159611072 0.4904570402968377 T T T

0.5698510015973931 0.4692992003628896 0.7021920606059110 T T T

0.6760278087351280 0.4477099778518021 0.8568683779129692 T T T

0.9207026187496091 0.6789544518918006 0.8297269265425977 T T T



**Structure files (CONTCAR) involved in this work:**

|                    |                    |                    |   |   |   |
|--------------------|--------------------|--------------------|---|---|---|
| 0.7672643491551099 | 0.6706013605273626 | 0.4653343861079811 | T | T | T |
| 0.6126893032131771 | 0.6736255357682133 | 0.4886044890668194 | T | T | T |
| 0.5600983791213059 | 0.6276476715342921 | 0.6990275416081305 | T | T | T |
| 0.6712817447311444 | 0.6748183878550105 | 0.8287950167438630 | T | T | T |
| 0.5776440399676114 | 0.9457284913716489 | 0.3580834344785100 | T | T | T |
| 0.6982025239774226 | 0.9746857335035333 | 0.2152033275123503 | T | T | T |
| 0.7192851937330093 | 0.9388159673552734 | 0.9933196592849541 | T | T | T |
| 0.8791819730270934 | 0.9347632185469931 | 0.9948432232818899 | T | T | T |
| 0.9308359145375621 | 0.9718608903743196 | 0.2050631332088247 | T | T | T |
| 0.8221262516924777 | 0.9470384453324017 | 0.3548271656515733 | T | T | T |
| 0.5777490424627412 | 0.1742362418943661 | 0.3295742550296242 | T | T | T |
| 0.6974888733842549 | 0.1328529527190007 | 0.1936135497258672 | T | T | T |
| 0.7323350190546272 | 0.1716825957583565 | 0.9721600853155438 | T | T | T |
| 0.8868916830891148 | 0.1735312938665321 | 0.9824127774805095 | T | T | T |
| 0.9348143001329090 | 0.1302788465130793 | 0.1977338871902978 | T | T | T |
| 0.8191616651486773 | 0.1749161943962835 | 0.3320774850493682 | T | T | T |
| 0.9231133044058186 | 0.0542622456425731 | 0.8555790012876104 | T | T | T |
| 0.8016314079924899 | 0.0261965005614312 | 0.7100126543238043 | T | T | T |
| 0.7808513995646806 | 0.0659081914212820 | 0.4921969669262666 | T | T | T |
| 0.6206416252023098 | 0.0700967466972606 | 0.4899893894097470 | T | T | T |
| 0.5675900383315801 | 0.0326855899964718 | 0.6988798084690258 | T | T | T |
| 0.6781496060590738 | 0.0542194624614272 | 0.8493903916275234 | T | T | T |
| 0.9232442709088396 | 0.8311433508729965 | 0.8373319181897624 | T | T | T |
| 0.8026231304381339 | 0.8687963690261969 | 0.6955844051197226 | T | T | T |
| 0.7689125990167317 | 0.8276596177423293 | 0.4779228175871144 | T | T | T |
| 0.6140373607155355 | 0.8273466547577748 | 0.4902028396741822 | T | T | T |
| 0.5632642258187490 | 0.8755238488590946 | 0.6981469913471032 | T | T | T |
| 0.6780998233168000 | 0.8334129357570910 | 0.8335728520672139 | T | T | T |
| 0.4232698203290647 | 0.4418815557828073 | 0.6454394142052603 | T | T | T |
| 0.3048952848826774 | 0.4694495561594060 | 0.7886752793318087 | T | T | T |
| 0.2794517744941785 | 0.4455254117773585 | 0.0153458030796541 | T | T | T |
| 0.1217190641562971 | 0.4370919925392227 | 0.0154579223860868 | T | T | T |
| 0.0640534027785575 | 0.4699993108297689 | 0.8019137766845540 | T | T | T |
| 0.1772678296321354 | 0.4362819763487516 | 0.6626867456641019 | T | T | T |
| 0.4151418444108787 | 0.6736009537747519 | 0.6666782458362100 | T | T | T |
| 0.3004388432976213 | 0.6278846281230320 | 0.8007459101992342 | T | T | T |
| 0.2671765772410055 | 0.6690382193903940 | 0.0197668784520849 | T | T | T |
| 0.1118287926422566 | 0.6730844570551148 | 0.0073189416999097 | T | T | T |
| 0.0628889199685068 | 0.6285742172904056 | 0.7935317097066198 | T | T | T |
| 0.1794884897912274 | 0.6716926550402473 | 0.6640626253823969 | T | T | T |
| 0.0797111901680001 | 0.5593241020471503 | 0.1469310596244776 | T | T | T |
| 0.1967436016851773 | 0.5286266095386758 | 0.2898880164782149 | T | T | T |
| 0.2148294800810548 | 0.5560989270969519 | 0.5156442664815198 | T | T | T |
| 0.3737870750185300 | 0.5655481516475999 | 0.5141339183427805 | T | T | T |
| 0.4305545944978819 | 0.5310206351471177 | 0.3045029135359728 | T | T | T |
| 0.3217638048035288 | 0.5633052259106933 | 0.1627875259020836 | T | T | T |
| 0.0865822846446617 | 0.3241001162561869 | 0.1611779459021848 | T | T | T |
| 0.1983214290613699 | 0.3706133499122314 | 0.3006002888601089 | T | T | T |
| 0.2300575361892804 | 0.3307520869694922 | 0.5192915185259953 | T | T | T |
| 0.3847998819898650 | 0.3278845060368862 | 0.5064629495471223 | T | T | T |
| 0.4300957894062887 | 0.3741127653145604 | 0.2932930448877986 | T | T | T |
| 0.3166943485880049 | 0.3297838734180895 | 0.1630146026763137 | T | T | T |
| 0.9206741710761667 | 0.5280678082308917 | 0.1953504632217779 | T | T | T |

**Structure files (CONTCAR) involved in this work:**

|                    |                    |                    |   |   |   |
|--------------------|--------------------|--------------------|---|---|---|
| 0.8225688991319756 | 0.3353816785740757 | 0.3272405409921652 | T | T | T |
| 0.7974116143803516 | 0.6382259932613278 | 0.6969240240892942 | T | T | T |
| 0.0111111979040700 | 0.5596643775527984 | 0.2268282245854505 | T | T | T |
| 0.3583935264725003 | 0.0705603103329854 | 0.7217182121481902 | T | T | T |
| 0.3164195904147671 | 0.0548094907655376 | 0.9071472382621727 | T | T | T |
| 0.2019272720295571 | 0.0468235275012762 | 0.0066561402558726 | T | T | T |
| 0.0922453815095022 | 0.0703236392349509 | 0.9001915356569853 | T | T | T |
| 0.1034033272923484 | 0.0645854001160233 | 0.7031276528339767 | T | T | T |
| 0.2291378573259544 | 0.0517275654448523 | 0.7599133129915979 | T | T | T |
| 0.3595585271224559 | 0.8279795661146828 | 0.7521548574572513 | T | T | T |
| 0.3007775869205991 | 0.8609374517569185 | 0.9204908637074078 | T | T | T |
| 0.1883005282487359 | 0.8506786793019298 | 0.0233217260802188 | T | T | T |
| 0.0878442495225176 | 0.8328722654497752 | 0.8975581218712246 | T | T | T |
| 0.1023812987595147 | 0.8410097397595511 | 0.7017788402697357 | T | T | T |
| 0.2285665947797570 | 0.8510064577327870 | 0.7561655390063399 | T | T | T |
| 0.3157158038376883 | 0.9515500568711983 | 0.7772714582087751 | T | T | T |
| 0.0892653080356840 | 0.9525751989634288 | 0.8095296334869436 | T | T | T |
| 0.4325558487601651 | 0.1278008570951494 | 0.5817755240122943 | T | T | T |
| 0.4118906811447410 | 0.9966443428938678 | 0.5739938337261592 | T | T | T |
| 0.3929591050749076 | 0.8645251043913504 | 0.5678422653970167 | T | T | T |
| 0.1961663179514906 | 0.1380368376439411 | 0.6174010628544185 | T | T | T |
| 0.1896327696826452 | 0.0059295826773091 | 0.5821564368554393 | T | T | T |
| 0.1942988602557760 | 0.8722763791071686 | 0.5651148495705697 | T | T | T |
| 0.9877134012964994 | 0.0393479074400422 | 0.7856074591033482 | T | T | T |
| 0.9853414009007104 | 0.8713755738774618 | 0.7852829415370228 | T | T | T |
| 0.1398604612410151 | 0.9318993875362727 | 0.2212950793405161 | T | T | T |
| 0.1831272842529873 | 0.9484900049164650 | 0.4058402039677823 | T | T | T |
| 0.2970199430748419 | 0.9481066017105995 | 0.5085704706150589 | T | T | T |
| 0.4072627755441292 | 0.9314366182532812 | 0.4019939397600204 | T | T | T |
| 0.3962013096335454 | 0.9359181290268518 | 0.2050310863631922 | T | T | T |
| 0.2697259820816909 | 0.9485270940394792 | 0.2580884524932707 | T | T | T |
| 0.1389973045478977 | 0.1732998892576403 | 0.2522940062336303 | T | T | T |
| 0.1945951220805147 | 0.1385928453588514 | 0.4216212164366385 | T | T | T |
| 0.3098305165382932 | 0.1480597897734717 | 0.5158034634726749 | T | T | T |
| 0.4128364310594645 | 0.1685113502625357 | 0.3946919768791773 | T | T | T |
| 0.3955097320508431 | 0.1583510728304074 | 0.1995465582747020 | T | T | T |
| 0.2704914397063574 | 0.1529027547591288 | 0.2611367320380650 | T | T | T |
| 0.1850149954892322 | 0.0503670946808284 | 0.2736742800554724 | T | T | T |
| 0.4152313487894998 | 0.0483413481084197 | 0.3089699060537664 | T | T | T |
| 0.0644989762990791 | 0.8714515536698060 | 0.0863291950984368 | T | T | T |
| 0.0853426118526470 | 0.0009414565439415 | 0.0683414368159260 | T | T | T |
| 0.1087102358340466 | 0.1318509026759900 | 0.0696331808550391 | T | T | T |
| 0.3047657005875886 | 0.8623048595177785 | 0.1162202495597918 | T | T | T |
| 0.3115772740747056 | 0.9945325630750519 | 0.0816153956362947 | T | T | T |
| 0.2992054079688540 | 0.1279599676656953 | 0.0691245757282991 | T | T | T |
| 0.5127477206918473 | 0.9567500735091199 | 0.2872078064928220 | T | T | T |
| 0.5149590783893575 | 0.1343398485103521 | 0.2789813558367946 | T | T | T |
| 0.6378031232685689 | 0.5641535910581196 | 0.2758059873506615 | T | T | T |
| 0.7005606634641979 | 0.5745120731404645 | 0.1055078906031019 | T | T | T |
| 0.7950626133095551 | 0.5613079995019826 | 0.9638709801321658 | T | T | T |
| 0.8905056880562340 | 0.5793628139181254 | 0.1034829890681100 | T | T | T |
| 0.8867601300959554 | 0.5378422324462843 | 0.3137226081925672 | T | T | T |
| 0.7619741200627717 | 0.5226360018094335 | 0.2616474850817909 | T | T | T |

**Structure files (CONTCAR) involved in this work:**

|                    |                    |                    |   |   |   |
|--------------------|--------------------|--------------------|---|---|---|
| 0.6375562901438052 | 0.3358305935342220 | 0.2623660548035862 | T | T | T |
| 0.6932484425584556 | 0.3357901744121600 | 0.0858535376125828 | T | T | T |
| 0.8093805201820937 | 0.3515452140161251 | 0.9912984372634533 | T | T | T |
| 0.9165895681471902 | 0.3211280899223571 | 0.1011356789294647 | T | T | T |
| 0.9050082978545863 | 0.3525889666650773 | 0.2919517043585587 | T | T | T |
| 0.7650666137429775 | 0.3706938984150436 | 0.2469732252774023 | T | T | T |
| 0.6685891593509018 | 0.4512432197331817 | 0.1760828327803766 | T | T | T |
| 0.9310020315460261 | 0.4481996585771592 | 0.1548526693778223 | T | T | T |
| 0.5682739688862875 | 0.6262344933998675 | 0.4155340578101077 | T | T | T |
| 0.5960422287542605 | 0.4973629498419502 | 0.4379456113572249 | T | T | T |
| 0.5845986575078598 | 0.3639533285327091 | 0.4415142089975440 | T | T | T |
| 0.7983454664603954 | 0.6310340414500754 | 0.3693313483834485 | T | T | T |
| 0.7953009136320405 | 0.5146913586235750 | 0.4566295478880407 | T | T | T |
| 0.8308007874663932 | 0.3865240877179406 | 0.4400936374160969 | T | T | T |
| 0.0225323194604450 | 0.3619613849042063 | 0.2064486616140778 | T | T | T |
| 0.8544891223537928 | 0.4375552105819881 | 0.7893230250846576 | T | T | T |
| 0.7952811675238004 | 0.4343457874453273 | 0.6139672058641574 | T | T | T |
| 0.7017265395088742 | 0.4196055703209566 | 0.4717912120827305 | T | T | T |
| 0.6055995429848954 | 0.4304781568463923 | 0.6090425284041335 | T | T | T |
| 0.6022539513566533 | 0.4441950851706927 | 0.8068604676840584 | T | T | T |
| 0.7271631977622470 | 0.4746994216826816 | 0.7709945983175395 | T | T | T |
| 0.8598793834991588 | 0.6824996098103496 | 0.7529133406156507 | T | T | T |
| 0.8121011743285587 | 0.6480048128571566 | 0.5635143813977809 | T | T | T |
| 0.6904179700082492 | 0.6481589607803481 | 0.4856099808868895 | T | T | T |
| 0.5845140908365936 | 0.6693603494444673 | 0.6013655712183961 | T | T | T |
| 0.5930904873515559 | 0.6607452770847341 | 0.7984735268784919 | T | T | T |
| 0.7177511159514542 | 0.6508672045687814 | 0.7371010054834054 | T | T | T |
| 0.8226528412141731 | 0.5515782445532958 | 0.6939959928622826 | T | T | T |
| 0.5814775925803686 | 0.5493752186877877 | 0.6863825370311482 | T | T | T |
| 0.9305828407362148 | 0.3770655023959958 | 0.9216464498083725 | T | T | T |
| 0.9139733549055913 | 0.5101763199094337 | 0.9343475714128571 | T | T | T |
| 0.9000659715450636 | 0.6422404341029880 | 0.9335759761523162 | T | T | T |
| 0.6962287073647736 | 0.3733681965451880 | 0.8945754205443828 | T | T | T |
| 0.6768338777851219 | 0.5012304977324075 | 0.9481243607632492 | T | T | T |
| 0.6869920032765168 | 0.6351674952267844 | 0.9324998915862489 | T | T | T |
| 0.4909884441404666 | 0.4514126160524268 | 0.7096350951468944 | T | T | T |
| 0.4792007600057390 | 0.6321086752199148 | 0.7081662765923339 | T | T | T |
| 0.6435446219597627 | 0.9404429962974598 | 0.2885196937710703 | T | T | T |
| 0.6986649449235059 | 0.9339071820057795 | 0.1102063124419638 | T | T | T |
| 0.7996444440151689 | 0.9469115481294039 | 0.9801398197470955 | T | T | T |
| 0.8983367154472798 | 0.9301938836595408 | 0.1123293792280865 | T | T | T |
| 0.8973882186126527 | 0.9483737443747315 | 0.3098858391428468 | T | T | T |
| 0.7715733675614789 | 0.9689719730727320 | 0.2657451836342326 | T | T | T |
| 0.6397770584338620 | 0.1741428597724375 | 0.2522842382150751 | T | T | T |
| 0.6963037738448228 | 0.1577789560497039 | 0.0785171611280880 | T | T | T |
| 0.8098712285453388 | 0.1471113940382599 | 0.9786776948170471 | T | T | T |
| 0.9135674563972186 | 0.1695674124031368 | 0.0964157201877871 | T | T | T |
| 0.8958134779351599 | 0.1605551768564119 | 0.2938510690033259 | T | T | T |
| 0.7700323216068083 | 0.1463890783684202 | 0.2433118747121607 | T | T | T |
| 0.6795569014484310 | 0.0531120665399888 | 0.1978952225987574 | T | T | T |
| 0.9176339143011287 | 0.0510203698943776 | 0.1844833356128500 | T | T | T |
| 0.5690250154980609 | 0.8757196064436802 | 0.4197109085124626 | T | T | T |
| 0.5819943232905663 | 0.0074330896174425 | 0.4375036335562845 | T | T | T |

**Structure files (CONTCAR) involved in this work:**

|                    |                    |                    |   |   |   |
|--------------------|--------------------|--------------------|---|---|---|
| 0.5994029530175828 | 0.1395446087155933 | 0.4348140667898815 | T | T | T |
| 0.8070867249304789 | 0.8712221779288046 | 0.3935671730458503 | T | T | T |
| 0.8162306386282854 | 0.9984249091151455 | 0.4483742480345979 | T | T | T |
| 0.8064145079860501 | 0.1321548885145426 | 0.4344404996227194 | T | T | T |
| 0.0100666307321871 | 0.9557179395327355 | 0.2160334070937540 | T | T | T |
| 0.0150021262046558 | 0.1386464408424320 | 0.2143714227382000 | T | T | T |
| 0.8571298864552684 | 0.0557363941794210 | 0.7859834899192769 | T | T | T |
| 0.8011002154444447 | 0.0719082455691662 | 0.6095455251291175 | T | T | T |
| 0.7003476709724865 | 0.0575140778288803 | 0.4800028129432811 | T | T | T |
| 0.5985844537002347 | 0.0759771175817508 | 0.6065199111893763 | T | T | T |
| 0.6031185169665648 | 0.0526555059369673 | 0.8036431730176733 | T | T | T |
| 0.7285822683180757 | 0.0288534742872087 | 0.7621364406632127 | T | T | T |
| 0.8599509648201603 | 0.8341309543158286 | 0.7626091329522026 | T | T | T |
| 0.8047444837405127 | 0.8335725181598612 | 0.5861848208419567 | T | T | T |
| 0.6915914396961491 | 0.8522623930924744 | 0.4862072965429706 | T | T | T |
| 0.5877757295995000 | 0.8295411742562087 | 0.6047397246354050 | T | T | T |
| 0.6025924520457409 | 0.8533642267539694 | 0.7989809822497717 | T | T | T |
| 0.7296152290820624 | 0.8571513172558238 | 0.7458567161035746 | T | T | T |
| 0.8181007189265084 | 0.9483904105526445 | 0.6829376714807426 | T | T | T |
| 0.5786665793506591 | 0.9536664710067841 | 0.6724418907496875 | T | T | T |
| 0.9323433315397678 | 0.1268250233737344 | 0.9095924732860595 | T | T | T |
| 0.9185532269980329 | 0.9968003237171235 | 0.9419789714812619 | T | T | T |
| 0.9026221050734800 | 0.8646202558011112 | 0.9437825683453527 | T | T | T |
| 0.6949452163348013 | 0.1303803523112728 | 0.8839129229407278 | T | T | T |
| 0.6827100809680539 | 0.0042785433984236 | 0.9453041911658464 | T | T | T |
| 0.6952706433349832 | 0.8704505550220819 | 0.9384012264201318 | T | T | T |
| 0.4886845851802118 | 0.0484067912267182 | 0.7147180317498464 | T | T | T |
| 0.4836482067189979 | 0.8646115534312094 | 0.7157206540151803 | T | T | T |
| 0.3604941024854183 | 0.4311679620580623 | 0.7212188391169774 | T | T | T |
| 0.3115964042244915 | 0.4458286961674547 | 0.9041494123100081 | T | T | T |
| 0.1993283917040796 | 0.4612702420777515 | 0.0119360179467961 | T | T | T |
| 0.0899274474356475 | 0.4358440067267344 | 0.9050692077146218 | T | T | T |
| 0.1020647614815423 | 0.4356590249212428 | 0.7076902280834563 | T | T | T |
| 0.2297120704279150 | 0.4509774558334381 | 0.7526501173321185 | T | T | T |
| 0.3579050960572351 | 0.6748840363334273 | 0.7527072841714345 | T | T | T |
| 0.3014911138937723 | 0.6380730730642992 | 0.9204723809870621 | T | T | T |
| 0.1885689637265993 | 0.6477274768976466 | 0.0193481755685785 | T | T | T |
| 0.0878601427658635 | 0.6687069634212014 | 0.8925933347894562 | T | T | T |
| 0.1021689107305312 | 0.6585990479822621 | 0.6966097374592467 | T | T | T |
| 0.2274766673260170 | 0.6487046487278936 | 0.7565752415580431 | T | T | T |
| 0.3167517239792171 | 0.5498344377821445 | 0.7750121252969424 | T | T | T |
| 0.0816444721030580 | 0.5496870524088059 | 0.8063532775914977 | T | T | T |
| 0.4318136050239563 | 0.3761337145360064 | 0.5743714219755635 | T | T | T |
| 0.4134146553071759 | 0.5075104296266119 | 0.5748244307754373 | T | T | T |
| 0.3845124854392204 | 0.6381246771462392 | 0.5670043619240909 | T | T | T |
| 0.1922937013875233 | 0.3628722638319675 | 0.6151639450956020 | T | T | T |
| 0.1818366656318781 | 0.4950628570443918 | 0.5785605121089652 | T | T | T |
| 0.1961501572440090 | 0.6284928755510614 | 0.5639098712892616 | T | T | T |
| 0.9847669695517526 | 0.4574039672365976 | 0.7875474582579852 | T | T | T |
| 0.9833915311781918 | 0.6382984541774690 | 0.7776135225309614 | T | T | T |
| 0.1437044793963902 | 0.5689687356615256 | 0.2184112436987701 | T | T | T |
| 0.1834963865238902 | 0.5538461258727745 | 0.4032024040862813 | T | T | T |
| 0.2949947731470647 | 0.5460688036943210 | 0.5112024883929499 | T | T | T |

**Structure files (CONTCAR) involved in this work:**

|                    |                    |                    |   |   |   |
|--------------------|--------------------|--------------------|---|---|---|
| 0.4029633671562562 | 0.5709411742045518 | 0.4017920909109951 | T | T | T |
| 0.3977036540322885 | 0.5645859177149479 | 0.2049008365560120 | T | T | T |
| 0.2720407750906976 | 0.5473824412172575 | 0.2567426734169833 | T | T | T |
| 0.1441172832109267 | 0.3229249467883766 | 0.2467170678865636 | T | T | T |
| 0.1945979647533568 | 0.3604020556072558 | 0.4198425746722002 | T | T | T |
| 0.3080062603378082 | 0.3536144050435494 | 0.5191936589669780 | T | T | T |
| 0.4062337898330604 | 0.3304495834757646 | 0.3896467092893270 | T | T | T |
| 0.3939134968887537 | 0.3463463813958959 | 0.1922094445937260 | T | T | T |
| 0.2723436783123519 | 0.3510510137324407 | 0.2604372337996155 | T | T | T |
| 0.1821009678771894 | 0.4491554339743731 | 0.2746043852273622 | T | T | T |
| 0.4093624982978597 | 0.4522161733553980 | 0.3122843275771699 | T | T | T |
| 0.0661895947927828 | 0.6237035446102398 | 0.0772860187489171 | T | T | T |
| 0.0792280396956426 | 0.4902710594276194 | 0.0854906948561386 | T | T | T |
| 0.1155708293762289 | 0.3627282521719024 | 0.0627041799180876 | T | T | T |
| 0.3034937954428178 | 0.6364512309976387 | 0.1166363056049593 | T | T | T |
| 0.3149151521069554 | 0.5048455960310406 | 0.0790994940657197 | T | T | T |
| 0.2930707954496847 | 0.3725260021243542 | 0.0656163285470599 | T | T | T |
| 0.5107957467762743 | 0.5374804186374127 | 0.2963984804326218 | T | T | T |
| 0.5100068863481024 | 0.3664466153633616 | 0.2776694439611654 | T | T | T |
| 0.4361721321986682 | 0.7501716108322847 | 0.6401099322369350 | T | T | T |
| 0.1907367670273101 | 0.7502796921587572 | 0.6374177884852077 | T | T | T |
| 0.2755235494238937 | 0.7495361710301549 | 0.0234567505591425 | T | T | T |
| 0.1032699868256911 | 0.7488415488586645 | 0.0484431123072102 | T | T | T |
| 0.0675537974516200 | 0.2481961122224309 | 0.1293001618026937 | T | T | T |
| 0.3079390791325449 | 0.2507763939975149 | 0.1369189931430179 | T | T | T |
| 0.2233717113372398 | 0.2501039013195879 | 0.5229409883956181 | T | T | T |
| 0.3922029677684968 | 0.2512593643736429 | 0.5459184448137464 | T | T | T |
| 0.5553275143189118 | 0.2509059409374775 | 0.3528085253799172 | T | T | T |
| 0.8069296162427296 | 0.2525901663531782 | 0.3548184513921657 | T | T | T |
| 0.7276202635918507 | 0.2504912774809157 | 0.9429589350499987 | T | T | T |
| 0.8911852904551276 | 0.2503464785018772 | 0.9415788836902854 | T | T | T |
| 0.9462018611728262 | 0.7544018687908817 | 0.8582260547221219 | T | T | T |
| 0.6828639373222509 | 0.7537605662815876 | 0.8530234592368925 | T | T | T |
| 0.7731337560082673 | 0.7497283342884765 | 0.4427245768242403 | T | T | T |
| 0.6080963761445468 | 0.7506351933407660 | 0.4494803495819836 | T | T | T |
| 0.9345029212611324 | 0.5050285984516423 | 0.5246738980220255 | T | T | T |
| 0.9323468797561322 | 0.4088638424598546 | 0.4416965593145815 | T | T | T |
| 0.8682324889984872 | 0.5649731206720118 | 0.5583659300484037 | T | T | T |
| 0.0508804554071700 | 0.4170664402670248 | 0.5124323060094247 | T | T | T |
| 0.0492578249682282 | 0.4295421708372024 | 0.3797298051970826 | T | T | T |
| 0.0441830049698712 | 0.3467417206265194 | 0.4288632503940353 | T | T | T |
| 0.9775758001839308 | 0.5235149693456139 | 0.5049173892600757 | T | T | T |
| 0.9694296892476064 | 0.6265714411649500 | 0.3317436646276576 | T | T | T |
| 0.0658345812504197 | 0.6173738951317674 | 0.3323399940952653 | T | T | T |
| 0.0295111886526714 | 0.3991186609308625 | 0.4417982393817084 | T | T | T |
| 0.0159699732304114 | 0.6040383454218873 | 0.3076665855594505 | T | T | T |

**Figure 4(a) Route(b-ii)-Zn ③**

Si Al O Zn H C

|                     |                     |                     |
|---------------------|---------------------|---------------------|
| 1.0000000000000000  |                     |                     |
| 20.0219999999999985 | 0.0000000000000000  | 0.0000000000000000  |
| 0.0000000000000000  | 19.8990000000000009 | 0.0000000000000000  |
| 0.0000000000000000  | 0.0000000000000000  | 13.3829999999999991 |

**Structure files (CONTCAR) involved in this work:**

|                    |                    |                     |   |   |   |
|--------------------|--------------------|---------------------|---|---|---|
| 93                 | 3                  | 193                 | 2 | 6 | 2 |
| Selective dynamics |                    |                     |   |   |   |
| Direct             |                    |                     |   |   |   |
| 0.4227091908098011 | 0.0607798299312813 | 0.6488053828131328  | T | T | T |
| 0.3052732528278072 | 0.0320970774096265 | 0.7921412483934248  | T | T | T |
| 0.2822343370642091 | 0.0563995547083539 | 0.0172075310270207  | T | T | T |
| 0.1230520689797300 | 0.0617966102665275 | 0.0126134617185283  | T | T | T |
| 0.0679990145875820 | 0.0314891694859569 | 0.8010184307423727  | T | T | T |
| 0.1804000651589431 | 0.0650646944243645 | 0.6651824767164368  | T | T | T |
| 0.4189963496177550 | 0.8280456879471583 | 0.6687322328645221  | T | T | T |
| 0.3013095714709511 | 0.8730703314151702 | 0.8006697492972946  | T | T | T |
| 0.2670328472953416 | 0.8317019683844235 | 0.0201132512401556  | T | T | T |
| 0.1118689037956214 | 0.8270758363882472 | 0.0119159997768415  | T | T | T |
| 0.0661400130139884 | 0.8748232136076675 | 0.7977821498110091  | T | T | T |
| 0.1795896277050086 | 0.8285694543302471 | 0.6650576601668714  | T | T | T |
| 0.0757545900514443 | 0.9400866902466956 | 0.1494165312703191  | T | T | T |
| 0.1947549310623245 | 0.9698054454493863 | 0.2909671599150790  | T | T | T |
| 0.2166802203452551 | 0.9437268909078357 | 0.5166968467937709  | T | T | T |
| 0.3770200683590511 | 0.9364635108259248 | 0.5139385634303207  | T | T | T |
| 0.4338179634750772 | 0.9690217209709336 | 0.3017005474154402  | T | T | T |
| 0.3205135903181654 | 0.9360649714013751 | 0.1650971220984338  | T | T | T |
| 0.0821564950313209 | 0.1716737993348065 | 0.1671983511144522  | T | T | T |
| 0.1978683608697027 | 0.1283813638411031 | 0.3021897655514357  | T | T | T |
| 0.2319039677940298 | 0.1694867198347992 | 0.5192125453215363  | T | T | T |
| 0.3874949065150052 | 0.1741049215442760 | 0.5086745208940967  | T | T | T |
| 0.4352115270819673 | 0.1277000523372240 | 0.2947017350612928  | T | T | T |
| 0.3180185275847470 | 0.1724963307346091 | 0.1664603831362967  | T | T | T |
| 0.5766609733975806 | 0.5556165532225743 | 0.3575484948940167  | T | T | T |
| 0.6914938051744461 | 0.5259173085538045 | 0.2055559032187103  | T | T | T |
| 0.7153635781060914 | 0.5686551758173040 | 0.9894320004012721  | T | T | T |
| 0.8742377945206005 | 0.5736247278499718 | 0.9871867903977161  | T | T | T |
| 0.8116217890483909 | 0.5500847695978702 | 0.3476742089845050  | T | T | T |
| 0.5741280191119768 | 0.3291098528855053 | 0.3341524479407314  | T | T | T |
| 0.6941529120534795 | 0.3727455338684715 | 0.1940228756906071  | T | T | T |
| 0.7314124558176638 | 0.3274788615362714 | 0.98192441311178749 | T | T | T |
| 0.8865459271269578 | 0.3259522636670592 | 0.9958687365891343  | T | T | T |
| 0.9434465970978767 | 0.3728319247923942 | 0.1953607407390375  | T | T | T |
| 0.9194202691154023 | 0.4454925328038474 | 0.8621314844723360  | T | T | T |
| 0.7992479027659725 | 0.4725787146723477 | 0.7224247366593879  | T | T | T |
| 0.7759478252590984 | 0.4351857061991632 | 0.4981514443131742  | T | T | T |
| 0.6177152712269165 | 0.4296760631288875 | 0.4929610727257887  | T | T | T |
| 0.5681160632673190 | 0.4690771590352100 | 0.7059782953022432  | T | T | T |
| 0.6756806902595190 | 0.4479963705031293 | 0.8597666274451911  | T | T | T |
| 0.9202532324105942 | 0.6789602669759158 | 0.8304349482076856  | T | T | T |
| 0.7677479108759626 | 0.6684813743569585 | 0.4679423872985415  | T | T | T |
| 0.6126994335416267 | 0.6730604216185333 | 0.4901541872424865  | T | T | T |
| 0.5593925360118863 | 0.6278255414244993 | 0.7013355866121996  | T | T | T |
| 0.6723429485817346 | 0.6739417290239809 | 0.8298931105368408  | T | T | T |
| 0.5780373497996489 | 0.9448136494179649 | 0.3591388512113187  | T | T | T |
| 0.6979023206018412 | 0.9735833468103533 | 0.2156098895823467  | T | T | T |
| 0.7193679704755250 | 0.9381943594584630 | 0.9935414576733733  | T | T | T |
| 0.8793652629824203 | 0.9347384659356999 | 0.9950119176290246  | T | T | T |
| 0.9309053569693899 | 0.9702782348720980 | 0.2053262405938598  | T | T | T |

**Structure files (CONTCAR) involved in this work:**

|                    |                    |                    |   |   |   |
|--------------------|--------------------|--------------------|---|---|---|
| 0.8218276048918485 | 0.9461203956214509 | 0.3553300523830317 | T | T | T |
| 0.5782467417324909 | 0.1739766323684089 | 0.3296674760397654 | T | T | T |
| 0.6976541308264684 | 0.1312321350661845 | 0.1938080734768059 | T | T | T |
| 0.7326959985865135 | 0.1715371333864012 | 0.9729716010863495 | T | T | T |
| 0.8874536335382870 | 0.1736994994183841 | 0.9834797522492279 | T | T | T |
| 0.9358316017384998 | 0.1283905976153822 | 0.1976370034025282 | T | T | T |
| 0.8199232121120201 | 0.1727944085184077 | 0.3300481825239789 | T | T | T |
| 0.9231130716030113 | 0.0546011707030277 | 0.8559965419591600 | T | T | T |
| 0.8017084750691928 | 0.0262882636096008 | 0.7096873960142432 | T | T | T |
| 0.7811480368187794 | 0.0658333769453825 | 0.4918646270917032 | T | T | T |
| 0.6208135822598599 | 0.0696778756436347 | 0.4903710913340260 | T | T | T |
| 0.5681157467110605 | 0.0325904286732430 | 0.6996713984420672 | T | T | T |
| 0.6785000388359888 | 0.0541246064679441 | 0.8499645457123042 | T | T | T |
| 0.9236172911092920 | 0.8313547379823141 | 0.8366925159035055 | T | T | T |
| 0.8025349796143295 | 0.8689494217826341 | 0.6955587293327290 | T | T | T |
| 0.7693021459491274 | 0.8262671390683668 | 0.4785247623486932 | T | T | T |
| 0.6144822130610269 | 0.8267756047020071 | 0.4913279029540858 | T | T | T |
| 0.5637744015736933 | 0.8753783210099862 | 0.6991551016044111 | T | T | T |
| 0.6784937475435474 | 0.8328230926309433 | 0.8338535933255554 | T | T | T |
| 0.4235110706717021 | 0.4422500756893637 | 0.6450598305157423 | T | T | T |
| 0.3032900899936155 | 0.4699022698282099 | 0.7855967657645520 | T | T | T |
| 0.2797688557952573 | 0.4443775751846816 | 0.0118650300387687 | T | T | T |
| 0.1210664643524225 | 0.4375605768778112 | 0.0158638656658358 | T | T | T |
| 0.0637616647733682 | 0.4696323863049369 | 0.8016223592043785 | T | T | T |
| 0.1755583359006604 | 0.4374915364641201 | 0.6586084577513068 | T | T | T |
| 0.4160382316727756 | 0.6744401388209231 | 0.6637967050629692 | T | T | T |
| 0.3000740256062894 | 0.6287432869883830 | 0.7982051527728374 | T | T | T |
| 0.2681691832756717 | 0.6704183343007064 | 0.0169028906486545 | T | T | T |
| 0.1134850012645959 | 0.6731761781025808 | 0.0050507642734395 | T | T | T |
| 0.0622595776772243 | 0.6286045256216649 | 0.7926325077528974 | T | T | T |
| 0.1787607609568417 | 0.6711432596179900 | 0.6632685403407160 | T | T | T |
| 0.0789030112242203 | 0.5605826057218273 | 0.1476559122825614 | T | T | T |
| 0.1982841994027679 | 0.5286839192360706 | 0.2860753330144645 | T | T | T |
| 0.2168119558225976 | 0.5563577899811909 | 0.5155582803559411 | T | T | T |
| 0.3756598945542040 | 0.5649883970592482 | 0.5136626189437005 | T | T | T |
| 0.4292635487037845 | 0.5303850446824679 | 0.3008601528160906 | T | T | T |
| 0.3229297487090170 | 0.5626842972480199 | 0.1550230162162901 | T | T | T |
| 0.0862014065458263 | 0.3237515172069089 | 0.1627487385761106 | T | T | T |
| 0.1994144173969069 | 0.3710338768875318 | 0.2990936660903987 | T | T | T |
| 0.2301766586307209 | 0.3307651035199182 | 0.5179259469746492 | T | T | T |
| 0.3854007674282025 | 0.3280428568117412 | 0.5062624957379463 | T | T | T |
| 0.4319221440443981 | 0.3730006648807553 | 0.2920683951157858 | T | T | T |
| 0.3180432088998635 | 0.3298103810540697 | 0.1628576429883750 | T | T | T |
| 0.9236555540793414 | 0.5297122596503817 | 0.1974603524568682 | T | T | T |
| 0.8209696467229666 | 0.3346778936772747 | 0.3277780629045379 | T | T | T |
| 0.7984784674926864 | 0.6355784226543502 | 0.6970664532008569 | T | T | T |
| 0.0111942977402952 | 0.5615622351910418 | 0.2243813436855478 | T | T | T |
| 0.3589695827073484 | 0.0711430753241530 | 0.7223785945261469 | T | T | T |
| 0.3166917015394790 | 0.0539598719185692 | 0.9074959520881887 | T | T | T |
| 0.2022705584016740 | 0.0458627914586309 | 0.0071310076612811 | T | T | T |
| 0.0923034258392084 | 0.0698604458690483 | 0.9015685275261958 | T | T | T |
| 0.1037132227381465 | 0.0653605643509051 | 0.7043638602493911 | T | T | T |
| 0.2296941529429762 | 0.0523901061326336 | 0.7600905365098071 | T | T | T |

**Structure files (CONTCAR) involved in this work:**

|                    |                    |                    |   |   |   |
|--------------------|--------------------|--------------------|---|---|---|
| 0.3601193522632672 | 0.8278283877710361 | 0.7521887757069396 | T | T | T |
| 0.3015424971261831 | 0.8616254803526006 | 0.9201777985527749 | T | T | T |
| 0.1886599772291519 | 0.8530144645013348 | 0.0217962476110175 | T | T | T |
| 0.0877033338618880 | 0.8329775128743233 | 0.8969654410816714 | T | T | T |
| 0.1028393718471751 | 0.8411130108328454 | 0.7011911942850708 | T | T | T |
| 0.2290933216003322 | 0.8501886671410274 | 0.7563060788138835 | T | T | T |
| 0.3158490553527213 | 0.9516247261495502 | 0.7756893538198842 | T | T | T |
| 0.0896232733780583 | 0.9526247396766740 | 0.8090005463167713 | T | T | T |
| 0.4331035631340628 | 0.1281979369513394 | 0.5819367548133826 | T | T | T |
| 0.4121964329677602 | 0.9972586333229699 | 0.5745559886421087 | T | T | T |
| 0.3929099741944106 | 0.8654421157872162 | 0.5682818985662228 | T | T | T |
| 0.1965373446534792 | 0.1382563255649426 | 0.6175506709146918 | T | T | T |
| 0.1893676954897082 | 0.0057103584843652 | 0.5833470207816526 | T | T | T |
| 0.1952671857230287 | 0.8720029780338643 | 0.5652270677653742 | T | T | T |
| 0.9879683889390355 | 0.0391823397772878 | 0.7867733290391783 | T | T | T |
| 0.9856403128161547 | 0.8713567391246040 | 0.7839151908489154 | T | T | T |
| 0.1401100665704859 | 0.9312704609697143 | 0.2222206568925670 | T | T | T |
| 0.1832468088325615 | 0.9488471311816639 | 0.4065822788756767 | T | T | T |
| 0.2971861882837299 | 0.9490987383051452 | 0.5089576038267937 | T | T | T |
| 0.4075419259263706 | 0.9323600459823599 | 0.4024613073061562 | T | T | T |
| 0.3967909857840665 | 0.9357491539268206 | 0.2056869096204400 | T | T | T |
| 0.2700422776475732 | 0.9484389436905211 | 0.2588068015272593 | T | T | T |
| 0.1391488901011829 | 0.1733877592884471 | 0.2534100068863676 | T | T | T |
| 0.1950464005285013 | 0.1380660703720568 | 0.4219983097741842 | T | T | T |
| 0.3103405843739728 | 0.1485646929704932 | 0.5157522081989881 | T | T | T |
| 0.4133147909868721 | 0.1687619967391038 | 0.3943746063485171 | T | T | T |
| 0.3953072197081217 | 0.1588383245615866 | 0.1989644238949578 | T | T | T |
| 0.2705505015885663 | 0.1526954925152058 | 0.2612173457284845 | T | T | T |
| 0.1850670250378434 | 0.0501282824377363 | 0.2734566045797841 | T | T | T |
| 0.4162163890837962 | 0.0488093830136899 | 0.3079366609971173 | T | T | T |
| 0.0650433439891365 | 0.8708851344834845 | 0.0863034738256227 | T | T | T |
| 0.0855158666072844 | 0.0009095731111902 | 0.0701221004642315 | T | T | T |
| 0.1100733539123910 | 0.1318031334013941 | 0.0703532073713246 | T | T | T |
| 0.3050373166714867 | 0.8630849676673441 | 0.1160519362176541 | T | T | T |
| 0.3125189886027988 | 0.9954914025353617 | 0.0832483301128423 | T | T | T |
| 0.2987497820266163 | 0.1284440941948936 | 0.0685429019833411 | T | T | T |
| 0.5133433592678841 | 0.9566204892667838 | 0.2881265224977212 | T | T | T |
| 0.5151286184127696 | 0.1357172497078458 | 0.2772589585858422 | T | T | T |
| 0.6377676148572305 | 0.5613702262722486 | 0.2791325255693403 | T | T | T |
| 0.7016982735883402 | 0.5740936677384451 | 0.1090180199587468 | T | T | T |
| 0.7947005978147405 | 0.5617795402414257 | 0.9647631908359749 | T | T | T |
| 0.8901162858886863 | 0.5783307167357377 | 0.1044296024572363 | T | T | T |
| 0.8879561054887070 | 0.5389747090329027 | 0.3154856374091722 | T | T | T |
| 0.7620147357862468 | 0.5195540255246783 | 0.2653549300719336 | T | T | T |
| 0.6402213419162716 | 0.3362327691696944 | 0.2669340876917443 | T | T | T |
| 0.6909871365661836 | 0.3347411811736798 | 0.0861366798760414 | T | T | T |
| 0.8089694666973760 | 0.3508592691852346 | 0.9968445754139741 | T | T | T |
| 0.9153993086742622 | 0.3217856189003158 | 0.1092557318147818 | T | T | T |
| 0.9059903214025690 | 0.3561447837452617 | 0.3013221751902555 | T | T | T |
| 0.7673566999837462 | 0.3698285892394343 | 0.2416364764552928 | T | T | T |
| 0.6688200133304890 | 0.4504200806084652 | 0.1759304907443168 | T | T | T |
| 0.9332983939042424 | 0.4487378293223399 | 0.1596329341849982 | T | T | T |
| 0.5684786034414921 | 0.6269232827589909 | 0.4151908183931703 | T | T | T |



**Structure files (CONTCAR) involved in this work:**

|                    |                    |                    |   |   |   |
|--------------------|--------------------|--------------------|---|---|---|
| 0.5888457368031241 | 0.4973958033916451 | 0.4408771670214713 | T | T | T |
| 0.5839113241549946 | 0.3635488974797119 | 0.4438798490553463 | T | T | T |
| 0.7964276825291288 | 0.6291403115695375 | 0.3701044835508746 | T | T | T |
| 0.7997216380893052 | 0.5118413517251216 | 0.4585161297691654 | T | T | T |
| 0.8215024415515871 | 0.3797992746225045 | 0.4432865120745643 | T | T | T |
| 0.0231007287606021 | 0.3600596730942537 | 0.2147940215349825 | T | T | T |
| 0.8541543903826336 | 0.4345298172577680 | 0.7909763632990260 | T | T | T |
| 0.7914393342803944 | 0.4327347600355703 | 0.6168001483765344 | T | T | T |
| 0.6978504062809990 | 0.4263165113710051 | 0.4731790226501695 | T | T | T |
| 0.6022498476198769 | 0.4301787610893159 | 0.6116797068242379 | T | T | T |
| 0.6018978047510986 | 0.4439276304200044 | 0.8097226648758580 | T | T | T |
| 0.7270324335486852 | 0.4756157089541314 | 0.7747926405943472 | T | T | T |
| 0.8592113130469800 | 0.6818423548389633 | 0.7541597791848553 | T | T | T |
| 0.8134791392004649 | 0.6436736243827449 | 0.5638557219038043 | T | T | T |
| 0.6903980104236515 | 0.6475159784975127 | 0.4892075279614642 | T | T | T |
| 0.5832130208509392 | 0.6682715889648078 | 0.6021740663905515 | T | T | T |
| 0.5939306982658169 | 0.6611662723270010 | 0.7992969520371243 | T | T | T |
| 0.7189281040322728 | 0.6482554029694245 | 0.7393017908738654 | T | T | T |
| 0.8247464733443863 | 0.5490045085709595 | 0.6974032221424955 | T | T | T |
| 0.5796598296504528 | 0.5491453322040537 | 0.6902608813806420 | T | T | T |
| 0.9304771043091802 | 0.3781651004179276 | 0.9288166284548832 | T | T | T |
| 0.9133686848774920 | 0.5108390060555602 | 0.9332985366497304 | T | T | T |
| 0.9002548593192341 | 0.6426239814155474 | 0.9350794984119458 | T | T | T |
| 0.6971779749812010 | 0.3736305594145284 | 0.8960923543949548 | T | T | T |
| 0.6763090877955673 | 0.5012750706672142 | 0.9514278341429863 | T | T | T |
| 0.6863592556576400 | 0.6351553615056452 | 0.9352338996323950 | T | T | T |
| 0.4891918078766959 | 0.4508129276792794 | 0.7143769004026810 | T | T | T |
| 0.4785391823349403 | 0.6337755988880682 | 0.7121186078832890 | T | T | T |
| 0.6437147245924157 | 0.9389025367150592 | 0.2892747441407784 | T | T | T |
| 0.6986810599363485 | 0.9331094008929227 | 0.1103623477652800 | T | T | T |
| 0.7997456265960953 | 0.9460773225961221 | 0.9802862439248108 | T | T | T |
| 0.8984279788310183 | 0.9287870081168446 | 0.1124608019196074 | T | T | T |
| 0.8970468428097279 | 0.9475081707537836 | 0.3101627821682637 | T | T | T |
| 0.7712785913076098 | 0.9682380469125020 | 0.2662952061945505 | T | T | T |
| 0.6410536128802675 | 0.1733496698585914 | 0.2537319599794048 | T | T | T |
| 0.6965350238158966 | 0.1571456318683064 | 0.0791149832801904 | T | T | T |
| 0.8103874366409239 | 0.1475587743204170 | 0.9795026765133495 | T | T | T |
| 0.9145137303492714 | 0.1683341257739090 | 0.0970239643412005 | T | T | T |
| 0.8969185943684667 | 0.1580960129173877 | 0.2940134113672344 | T | T | T |
| 0.7708397287108906 | 0.1424327136036603 | 0.2426376175903583 | T | T | T |
| 0.6782478587178851 | 0.0517721890702693 | 0.1976953514377713 | T | T | T |
| 0.9183313274885390 | 0.0493549509912446 | 0.1837741135598824 | T | T | T |
| 0.5691233263515266 | 0.8749665982389038 | 0.4209374867884724 | T | T | T |
| 0.5827641866297172 | 0.0063025928146097 | 0.4388313130742365 | T | T | T |
| 0.5979835191133821 | 0.1385483691729043 | 0.4351163514818567 | T | T | T |
| 0.8072676591802572 | 0.8701007526346096 | 0.3940114759262994 | T | T | T |
| 0.8159123726426019 | 0.9977551380432045 | 0.4486500500169948 | T | T | T |
| 0.8072347850706363 | 0.1319542618973440 | 0.4342210282003380 | T | T | T |
| 0.0100857438188962 | 0.9539255641082265 | 0.2166406397290935 | T | T | T |
| 0.0159508532567280 | 0.1369466358457164 | 0.2142802947136948 | T | T | T |
| 0.8574888369195528 | 0.0554237052395168 | 0.7856366063300793 | T | T | T |
| 0.8012418788817677 | 0.0721282047221831 | 0.6093164331090124 | T | T | T |
| 0.7006075197007472 | 0.0583654125688831 | 0.4789342388040921 | T | T | T |

**Structure files (CONTCAR) involved in this work:**

|                    |                    |                    |   |   |   |
|--------------------|--------------------|--------------------|---|---|---|
| 0.5994874480882419 | 0.0755627743389396 | 0.6072376599696846 | T | T | T |
| 0.6033662535942851 | 0.0528426523886167 | 0.8045252298610643 | T | T | T |
| 0.7288543089192673 | 0.0291893191176929 | 0.7623371815125931 | T | T | T |
| 0.8599574513685529 | 0.8347130902132590 | 0.7628226866186084 | T | T | T |
| 0.8048945441276060 | 0.8329999051285448 | 0.5868226673907733 | T | T | T |
| 0.6920714973142196 | 0.8514023352393888 | 0.4862062915230702 | T | T | T |
| 0.5885493957890259 | 0.8293099183448706 | 0.6060115865314748 | T | T | T |
| 0.6027062104644403 | 0.8524099354795746 | 0.7999348420888046 | T | T | T |
| 0.7295934423840895 | 0.8577300195116060 | 0.7462542593348315 | T | T | T |
| 0.8178390263267847 | 0.9485300975741783 | 0.6817471732548622 | T | T | T |
| 0.5795167924504638 | 0.9535124456444773 | 0.6739245235237448 | T | T | T |
| 0.9321818387533524 | 0.1277704872530059 | 0.9085430715162583 | T | T | T |
| 0.9179686470598002 | 0.9979277834071816 | 0.9436452483429025 | T | T | T |
| 0.9036866044048034 | 0.8652351901398280 | 0.9430965325700087 | T | T | T |
| 0.6954483737484163 | 0.1301799241044858 | 0.8847528729450325 | T | T | T |
| 0.6830214527601447 | 0.0037856336316030 | 0.9454397153615463 | T | T | T |
| 0.6951963159299396 | 0.8698017963525794 | 0.9388871275034658 | T | T | T |
| 0.4892214508670655 | 0.0486299983853791 | 0.7150666861206845 | T | T | T |
| 0.4839712213712597 | 0.8652821408206377 | 0.7159474260802415 | T | T | T |
| 0.3582108145625623 | 0.4326337895235934 | 0.7160079915766794 | T | T | T |
| 0.3085990768203118 | 0.4414933306676058 | 0.8988188502032420 | T | T | T |
| 0.1994491041062175 | 0.4592321214782596 | 0.0138942672293191 | T | T | T |
| 0.0911150517121169 | 0.4359499319768940 | 0.9039815746866102 | T | T | T |
| 0.1004430528850756 | 0.4361877840570190 | 0.7050458422625576 | T | T | T |
| 0.2278400962468757 | 0.4547291538715155 | 0.7475968273390908 | T | T | T |
| 0.3548041597302737 | 0.6754652908755838 | 0.7432524571893785 | T | T | T |
| 0.3040246888596326 | 0.6429611808185567 | 0.9167634770866849 | T | T | T |
| 0.1901622950963417 | 0.6469739005610824 | 0.0143340740540908 | T | T | T |
| 0.0878927744588181 | 0.6689877910617371 | 0.8910389807155468 | T | T | T |
| 0.1012060999454188 | 0.6580218841131046 | 0.6948689408982093 | T | T | T |
| 0.2258003521205517 | 0.6470712226510651 | 0.7563192057865330 | T | T | T |
| 0.3173886221110786 | 0.5502123764426957 | 0.7784420625767692 | T | T | T |
| 0.0802431227664293 | 0.5494648257812882 | 0.8055040911371729 | T | T | T |
| 0.4320867885059065 | 0.3760770716683370 | 0.5749668198341402 | T | T | T |
| 0.4177160589233512 | 0.5077965348841562 | 0.5728115248846396 | T | T | T |
| 0.3906957578074411 | 0.6384432858013391 | 0.5612304257960308 | T | T | T |
| 0.1919862732772337 | 0.3638067798868794 | 0.6129103142430806 | T | T | T |
| 0.1789234606232289 | 0.4951555261010426 | 0.5723497283493179 | T | T | T |
| 0.1957387671462666 | 0.6284400044447283 | 0.5627650353929288 | T | T | T |
| 0.9841048594119211 | 0.4555884749702445 | 0.7881832316444984 | T | T | T |
| 0.9826926470123450 | 0.6380671508002100 | 0.7776428293578854 | T | T | T |
| 0.1433809311824037 | 0.5696923949608187 | 0.2192879984053667 | T | T | T |
| 0.1925351496383331 | 0.5554392397266688 | 0.3998113264706216 | T | T | T |
| 0.2968391476857861 | 0.5458783298539845 | 0.5232447270836389 | T | T | T |
| 0.3976881166833653 | 0.5680413479877997 | 0.3975714311446278 | T | T | T |
| 0.3981524218240367 | 0.5632700594649286 | 0.1996278764820222 | T | T | T |
| 0.2726148467310478 | 0.5442020010936458 | 0.2465213873114822 | T | T | T |
| 0.1467596266407802 | 0.3225101711343658 | 0.2433742530785133 | T | T | T |
| 0.1942313733786304 | 0.3595948697852148 | 0.4181865172094907 | T | T | T |
| 0.3082163915745806 | 0.3533376276830701 | 0.5174439428994613 | T | T | T |
| 0.4079897948959778 | 0.3309028502199678 | 0.3899559605927611 | T | T | T |
| 0.3958136184758939 | 0.3435710844727632 | 0.1918906062704675 | T | T | T |
| 0.2741831388184637 | 0.3533649294742826 | 0.2599127568920154 | T | T | T |

**Structure files (CONTCAR) involved in this work:**

|                     |                    |                    |   |   |   |
|---------------------|--------------------|--------------------|---|---|---|
| 0.1810243137350091  | 0.4493385970926759 | 0.2752368277866791 | T | T | T |
| 0.4103477655613735  | 0.4510804847741808 | 0.3073553541950425 | T | T | T |
| 0.0680539632489514  | 0.6250822561737959 | 0.0765147139764956 | T | T | T |
| 0.0795679728307730  | 0.4920371446672122 | 0.0842175465863205 | T | T | T |
| 0.1112659783633120  | 0.3635621539126861 | 0.0631082566185048 | T | T | T |
| 0.3050508157326102  | 0.6369000179697658 | 0.1125639506654507 | T | T | T |
| 0.3167758727658362  | 0.5062392077901445 | 0.0681297801554667 | T | T | T |
| 0.2956592168082410  | 0.3728730660439474 | 0.0652076144919878 | T | T | T |
| 0.5091977246782177  | 0.5400935455021191 | 0.2953747124820886 | T | T | T |
| 0.5119719413813437  | 0.3659503839291795 | 0.2771742713077514 | T | T | T |
| 0.4373320159911733  | 0.7511531200062754 | 0.6388308018089179 | T | T | T |
| 0.1904654095014976  | 0.7497983686560009 | 0.6374985496406280 | T | T | T |
| 0.2741354677837488  | 0.7509014850426355 | 0.0244119822026777 | T | T | T |
| 0.1066106359645393  | 0.7490636903577794 | 0.0466654287585609 | T | T | T |
| 0.0669447438534338  | 0.2478625116375700 | 0.1305994104271385 | T | T | T |
| 0.3067887414731776  | 0.2510031567597797 | 0.1375648586909862 | T | T | T |
| 0.2232322122543415  | 0.2501807103843505 | 0.5229593214099468 | T | T | T |
| 0.3927861948001841  | 0.2514692417005023 | 0.5459338241504537 | T | T | T |
| 0.5569413799790012  | 0.2507670977409217 | 0.3535820286277971 | T | T | T |
| 0.8077253924068217  | 0.2507926431079575 | 0.3479282443055273 | T | T | T |
| 0.7279052343863458  | 0.2503214100190194 | 0.9436749800156670 | T | T | T |
| 0.8924307777138336  | 0.2514042347350904 | 0.9466285046382681 | T | T | T |
| 0.9462420068543400  | 0.7545096383007671 | 0.8576357782360047 | T | T | T |
| 0.6845027210090294  | 0.7531598302832547 | 0.8524121362301378 | T | T | T |
| 0.7739589848424211  | 0.7478998664056742 | 0.4455237562711205 | T | T | T |
| 0.6083424896141510  | 0.7500899155771338 | 0.4511718579472746 | T | T | T |
| 0.9348860405191659  | 0.4854981951368165 | 0.5378578319841915 | T | T | T |
| 0.9316730345742136  | 0.4015678898877622 | 0.4449991018742415 | T | T | T |
| 0.8716051462203994  | 0.5562920350116189 | 0.5610958044087135 | T | T | T |
| 0.0288049834868611  | 0.6210611374059327 | 0.4633392054546219 | T | T | T |
| 0.0787743403852195  | 0.5589695204335283 | 0.4050738914455979 | T | T | T |
| -0.0081004448439591 | 0.5445298355270515 | 0.4227238677711785 | T | T | T |
| 0.9618900696555712  | 0.4747032653937316 | 0.5970068675962165 | T | T | T |
| 0.9657428231252875  | 0.6398239830566399 | 0.3033636820165433 | T | T | T |
| 0.0528314412592673  | 0.6512095998786123 | 0.2817678808107180 | T | T | T |
| 0.0294028611093182  | 0.5825485210172637 | 0.4041559196428562 | T | T | T |
| 0.0145731028998253  | 0.6148784282167484 | 0.3050693113147042 | T | T | T |

**Figure 4(a) Route(b-ii)-Zn ④**

Si Al O Zn H C

|                     |                     |                     |
|---------------------|---------------------|---------------------|
| 1.0000000000000000  |                     |                     |
| 20.0219999999999985 | 0.0000000000000000  | 0.0000000000000000  |
| 0.0000000000000000  | 19.8990000000000009 | 0.0000000000000000  |
| 0.0000000000000000  | 0.0000000000000000  | 13.3829999999999991 |
| 93                  | 3                   | 193                 |
| 2                   | 6                   | 2                   |

Selective dynamics

Direct

|                    |                    |                    |   |   |   |
|--------------------|--------------------|--------------------|---|---|---|
| 0.4247402562620565 | 0.0593715117031816 | 0.6496565531218057 | T | T | T |
| 0.3076107178229630 | 0.0305324333261743 | 0.7945029268366219 | T | T | T |
| 0.2844389483514430 | 0.0555330255925546 | 0.0186199900715033 | T | T | T |
| 0.1258229035941300 | 0.0609598301333821 | 0.0135797289267322 | T | T | T |
| 0.0705015226566736 | 0.0300575770293178 | 0.8031830760430307 | T | T | T |
| 0.1827800783045147 | 0.0637298169403631 | 0.6671765322640817 | T | T | T |

**Structure files (CONTCAR) involved in this work:**

|                    |                    |                    |   |   |   |
|--------------------|--------------------|--------------------|---|---|---|
| 0.4203786958730484 | 0.8270261960876569 | 0.6690206552518559 | T | T | T |
| 0.3037390884990527 | 0.8713153322166658 | 0.8038812129629985 | T | T | T |
| 0.2684383725492450 | 0.8303651736596936 | 0.0228990078025499 | T | T | T |
| 0.1133354894406955 | 0.8254627439747443 | 0.0145673795320578 | T | T | T |
| 0.0683108636236770 | 0.8734392057105099 | 0.8005486876892143 | T | T | T |
| 0.1821830587876169 | 0.8279745075827780 | 0.6675072197033322 | T | T | T |
| 0.0781208016109175 | 0.9398015860418217 | 0.1502380656486497 | T | T | T |
| 0.1963767634149815 | 0.9696664637098760 | 0.2928748343322101 | T | T | T |
| 0.2188578916844709 | 0.9431029161560630 | 0.5177002787740677 | T | T | T |
| 0.3787553196494481 | 0.9356186400228439 | 0.5142292420033938 | T | T | T |
| 0.4354614680894209 | 0.9680235809550731 | 0.3026966025788100 | T | T | T |
| 0.3221106205377092 | 0.9357616164869201 | 0.1668695509966232 | T | T | T |
| 0.0845088808408958 | 0.1717795586791824 | 0.1666752857228701 | T | T | T |
| 0.1982841249834927 | 0.1284563643405918 | 0.3049975833284118 | T | T | T |
| 0.2334564126611424 | 0.1689696015784220 | 0.5222977682450147 | T | T | T |
| 0.3887023345602614 | 0.1730009262873315 | 0.5107530122803606 | T | T | T |
| 0.4355180047433583 | 0.1264295189697969 | 0.2963439228197369 | T | T | T |
| 0.3183011274271842 | 0.1719450279610311 | 0.1682924352592522 | T | T | T |
| 0.5778341788295864 | 0.5558217392945423 | 0.3542310162980164 | T | T | T |
| 0.6909573812774403 | 0.5263099984324724 | 0.2038808323159652 | T | T | T |
| 0.7180537284400050 | 0.5677749640473878 | 0.9860024337653311 | T | T | T |
| 0.8750822770733935 | 0.5731024914104532 | 0.9901179732118098 | T | T | T |
| 0.8120822835063459 | 0.5495999084437995 | 0.3500183865366283 | T | T | T |
| 0.5754269938956067 | 0.3280370186813508 | 0.3297890367673912 | T | T | T |
| 0.6946733080296849 | 0.3716330471613102 | 0.1894299937060753 | T | T | T |
| 0.7334346217622763 | 0.3278050482417802 | 0.9756762264641414 | T | T | T |
| 0.8882598280444896 | 0.3242220171543282 | 0.9913168529357185 | T | T | T |
| 0.9445111055107014 | 0.3725403417146798 | 0.1851129503890708 | T | T | T |
| 0.9228771769215939 | 0.4463330729505706 | 0.8644822072936454 | T | T | T |
| 0.8054593392995405 | 0.4728078559523924 | 0.7184151985471334 | T | T | T |
| 0.7810885094768465 | 0.4378933820777888 | 0.4986253266789410 | T | T | T |
| 0.6232403547970830 | 0.4291394376653409 | 0.4878279906982044 | T | T | T |
| 0.5713482830733836 | 0.4689210869092544 | 0.6999192653008397 | T | T | T |
| 0.6804840958873918 | 0.4486344868865423 | 0.8525434841186674 | T | T | T |
| 0.9233150838113546 | 0.6771992291931922 | 0.8350489585105723 | T | T | T |
| 0.7717964712589255 | 0.6697616200050995 | 0.4654426648047841 | T | T | T |
| 0.6167206469751664 | 0.6729044308363235 | 0.4860179324191072 | T | T | T |
| 0.5634377167060701 | 0.6274392826141555 | 0.6966452748658412 | T | T | T |
| 0.6749702354952206 | 0.6720928972292890 | 0.8287495959569637 | T | T | T |
| 0.5803823031411350 | 0.9453627386115351 | 0.3586397988364471 | T | T | T |
| 0.7012721644291600 | 0.9735165669463377 | 0.2146494168033461 | T | T | T |
| 0.7215408089865902 | 0.9358045531446755 | 0.9938867383745492 | T | T | T |
| 0.8816674407318521 | 0.9332436468498438 | 0.9966391065844712 | T | T | T |
| 0.9335493014235852 | 0.9707115289097874 | 0.2060554780345969 | T | T | T |
| 0.8248227555400708 | 0.9469030466520831 | 0.3561065898260640 | T | T | T |
| 0.5784044556411858 | 0.1729086771316824 | 0.3300993291732806 | T | T | T |
| 0.7002710950916415 | 0.1322418393411271 | 0.1946673717964446 | T | T | T |
| 0.7337087040439031 | 0.1716539255992893 | 0.9724334909696185 | T | T | T |
| 0.8884254959107898 | 0.1727741173674512 | 0.9817451585721260 | T | T | T |
| 0.9369997514462843 | 0.1287974706671808 | 0.1961972134297442 | T | T | T |
| 0.8230514172895803 | 0.1742308257309924 | 0.3329059572643336 | T | T | T |
| 0.9254663977550115 | 0.0529955337174470 | 0.8570764605503606 | T | T | T |
| 0.8040388717827275 | 0.0256019541466655 | 0.7105874537992193 | T | T | T |

**Structure files (CONTCAR) involved in this work:**

|                    |                    |                    |   |   |   |
|--------------------|--------------------|--------------------|---|---|---|
| 0.7831931902255511 | 0.0669860676820652 | 0.4928899105239651 | T | T | T |
| 0.6226299557910315 | 0.0700780860098535 | 0.4910058660229983 | T | T | T |
| 0.5704733954151223 | 0.0309963877034393 | 0.6996303811286452 | T | T | T |
| 0.6802737568164862 | 0.0524270388637508 | 0.8512126739177005 | T | T | T |
| 0.9257962901006083 | 0.8303189354725105 | 0.8382383408221963 | T | T | T |
| 0.8048385788763162 | 0.8683557866673510 | 0.6965234644482651 | T | T | T |
| 0.7722421151594990 | 0.8266780241101089 | 0.4789104834272327 | T | T | T |
| 0.6173212985508919 | 0.8265444056341874 | 0.4897021853653700 | T | T | T |
| 0.5659034194813449 | 0.8739436613564704 | 0.6976688230927609 | T | T | T |
| 0.6804814870741877 | 0.8315347458892270 | 0.8330561355515403 | T | T | T |
| 0.4258223890892133 | 0.4418062369863197 | 0.6422604473561211 | T | T | T |
| 0.3062188749100917 | 0.4696215837832078 | 0.7839011410239932 | T | T | T |
| 0.2834533977864373 | 0.4429661332570803 | 0.0091188012978185 | T | T | T |
| 0.1253569216879428 | 0.4376621552141466 | 0.0148769630309885 | T | T | T |
| 0.0673538982982386 | 0.4695675179269593 | 0.8032163982381832 | T | T | T |
| 0.1771452908003635 | 0.4384028633471073 | 0.6572826726883372 | T | T | T |
| 0.4181861621890473 | 0.6735671123345693 | 0.6630614072214683 | T | T | T |
| 0.3032428843848283 | 0.6280467456705330 | 0.7994152217485788 | T | T | T |
| 0.2692556688721043 | 0.6692891757295476 | 0.0199966231146539 | T | T | T |
| 0.1145317558759252 | 0.6713227432744272 | 0.0118265730888005 | T | T | T |
| 0.0665331318341400 | 0.6284374432525341 | 0.7983476819505604 | T | T | T |
| 0.1807411754168225 | 0.6706968761477208 | 0.6636639314339391 | T | T | T |
| 0.0744743217425347 | 0.5581403482650574 | 0.1517350926557237 | T | T | T |
| 0.1962618038678345 | 0.5287875492419040 | 0.2848898520048845 | T | T | T |
| 0.2159332406645059 | 0.5566729928044873 | 0.5142297340437499 | T | T | T |
| 0.3743806374010775 | 0.5645223618230679 | 0.5145051731168017 | T | T | T |
| 0.4277710445750572 | 0.5282879279388107 | 0.3043572776487033 | T | T | T |
| 0.3237398108635440 | 0.5598208346575119 | 0.1542540173714186 | T | T | T |
| 0.0891086582757990 | 0.3240469062515775 | 0.1593877049644919 | T | T | T |
| 0.1992450973479591 | 0.3710121601368898 | 0.2998858393187553 | T | T | T |
| 0.2322804085713366 | 0.3301401271086012 | 0.5191819394457278 | T | T | T |
| 0.3871136735608617 | 0.3266431030850691 | 0.5060850839979885 | T | T | T |
| 0.4322068511381694 | 0.3714599675447746 | 0.2933066330439036 | T | T | T |
| 0.3185320032235163 | 0.3294762875973150 | 0.1622685735458388 | T | T | T |
| 0.9271144261406821 | 0.5279743876169793 | 0.1945377886207160 | T | T | T |
| 0.8231294526445591 | 0.3354689925485123 | 0.3244361804373539 | T | T | T |
| 0.8021051119010300 | 0.6341774784815032 | 0.6961916597459403 | T | T | T |
| 0.0090528250442696 | 0.5525479818590673 | 0.2210214864888771 | T | T | T |
| 0.3613379577530884 | 0.0688368784276650 | 0.7239501553454329 | T | T | T |
| 0.3193612624168863 | 0.0538686242866711 | 0.9091645567185151 | T | T | T |
| 0.2047128393639064 | 0.0434986602586243 | 0.0075151901392028 | T | T | T |
| 0.0947827880997719 | 0.0696235194208193 | 0.9027421472505293 | T | T | T |
| 0.1060135312660492 | 0.0631781129752679 | 0.7058921905720379 | T | T | T |
| 0.2319318796066910 | 0.0504247904993878 | 0.7620619088699090 | T | T | T |
| 0.3626951807884655 | 0.8267619279917261 | 0.7542431186515168 | T | T | T |
| 0.3043214273938783 | 0.8592358839294831 | 0.9231761436709004 | T | T | T |
| 0.1901272214423362 | 0.8520891148663873 | 0.0221774438165479 | T | T | T |
| 0.0886764380445874 | 0.8311513587290030 | 0.8996175292514533 | T | T | T |
| 0.1053966572607303 | 0.8405237324432504 | 0.7036283286823437 | T | T | T |
| 0.2314564481113340 | 0.8487919389092426 | 0.7593797668517906 | T | T | T |
| 0.3179186975835667 | 0.9500007533224082 | 0.7796874158348989 | T | T | T |
| 0.0917441464175863 | 0.9512181064209293 | 0.8129921938973483 | T | T | T |
| 0.4345912444155537 | 0.1273683909389210 | 0.5839613159533148 | T | T | T |

**Structure files (CONTCAR) involved in this work:**

|                    |                    |                    |   |   |   |
|--------------------|--------------------|--------------------|---|---|---|
| 0.4143685523782226 | 0.9963884746639674 | 0.5744177020267838 | T | T | T |
| 0.3931778339251377 | 0.8647047508091370 | 0.5695886965385278 | T | T | T |
| 0.1984458871494175 | 0.1373036215349263 | 0.6206204195713646 | T | T | T |
| 0.1918949013102184 | 0.0054261980270374 | 0.5838880550454408 | T | T | T |
| 0.1982756669985484 | 0.8718458556186939 | 0.5682392932708923 | T | T | T |
| 0.9904798557405903 | 0.0375607701648032 | 0.7884736410622487 | T | T | T |
| 0.9877881732702339 | 0.8700082869520119 | 0.7848687010483214 | T | T | T |
| 0.1427040286657157 | 0.9311137935803010 | 0.2225245040050423 | T | T | T |
| 0.1846962053540309 | 0.9471588385850737 | 0.4079204825861662 | T | T | T |
| 0.2992021320878077 | 0.9491976873908275 | 0.5079789161819266 | T | T | T |
| 0.4103193061524702 | 0.9305969737120093 | 0.4034765322050268 | T | T | T |
| 0.3984990685878074 | 0.9343702905649106 | 0.2070825098901635 | T | T | T |
| 0.2720761201392678 | 0.9498547016936733 | 0.2606064955157251 | T | T | T |
| 0.1393367008001845 | 0.1731796212135558 | 0.2559742620012278 | T | T | T |
| 0.1959768763393449 | 0.1388483331356921 | 0.4247340715595511 | T | T | T |
| 0.3116692647708337 | 0.1472354808988082 | 0.5179721389655507 | T | T | T |
| 0.4142964218417222 | 0.1673196947335580 | 0.3963886764510402 | T | T | T |
| 0.3954961629436352 | 0.1578838796741724 | 0.2010436359434598 | T | T | T |
| 0.2708404906131553 | 0.1523277679441237 | 0.2630688421381900 | T | T | T |
| 0.1852931728932783 | 0.0500258005660184 | 0.2776164430388589 | T | T | T |
| 0.4165852354913890 | 0.0475130555975890 | 0.3095049181990381 | T | T | T |
| 0.0668116721085652 | 0.8705627291460764 | 0.0878852399300388 | T | T | T |
| 0.0874408178102905 | 0.0005795110816022 | 0.0707519003913729 | T | T | T |
| 0.1144595532313874 | 0.1311218329880551 | 0.0719125710328339 | T | T | T |
| 0.3054055426931677 | 0.8628691037573113 | 0.1189748448992243 | T | T | T |
| 0.3155263825214082 | 0.9950245949780610 | 0.0845046556571535 | T | T | T |
| 0.2991309192770041 | 0.1277669620510599 | 0.0704767305424143 | T | T | T |
| 0.5152302430173380 | 0.9570811200639312 | 0.2886025137323320 | T | T | T |
| 0.5154971211043096 | 0.1340571855511153 | 0.2782564524171630 | T | T | T |
| 0.6330602731443523 | 0.5641964006205369 | 0.2668094944224672 | T | T | T |
| 0.7069281400804712 | 0.5712757109660807 | 0.1061713201494403 | T | T | T |
| 0.7968076079061830 | 0.5627571766389077 | 0.9575283014603421 | T | T | T |
| 0.8839921500964345 | 0.5765639188226220 | 0.1090039753672443 | T | T | T |
| 0.8862117950039790 | 0.5251193741816109 | 0.3159178850396217 | T | T | T |
| 0.7572382670612068 | 0.5218983585970801 | 0.2742205169979677 | T | T | T |
| 0.6398324764976744 | 0.3326613064520759 | 0.2579555168437414 | T | T | T |
| 0.6922999197705897 | 0.3375460612352328 | 0.0788234062325330 | T | T | T |
| 0.8111301260831580 | 0.3499590950657285 | 0.9918673753974588 | T | T | T |
| 0.9160007373114887 | 0.3176878740422262 | 0.1054865670291851 | T | T | T |
| 0.9086030181723390 | 0.3568148747708944 | 0.2947329727506305 | T | T | T |
| 0.7676393301522990 | 0.3665699460574046 | 0.2382985028374526 | T | T | T |
| 0.6700191334581900 | 0.4498606886451025 | 0.1774240503463366 | T | T | T |
| 0.9266348673060733 | 0.4465205410645319 | 0.1500515461415161 | T | T | T |
| 0.5706677929651240 | 0.6264842598111666 | 0.4140309996926510 | T | T | T |
| 0.5987294128757136 | 0.4976101392326884 | 0.4336231348607452 | T | T | T |
| 0.5895760114409712 | 0.3635293168386554 | 0.4376152042125251 | T | T | T |
| 0.8061033225853367 | 0.6301622148334448 | 0.3702544864417911 | T | T | T |
| 0.8012581491679115 | 0.5166360946143282 | 0.4648922753082648 | T | T | T |
| 0.8296367248887289 | 0.3905848760575996 | 0.4311593108316266 | T | T | T |
| 0.0241100117491835 | 0.3620878216538639 | 0.2039567999295233 | T | T | T |
| 0.8580836950719603 | 0.4363450069210975 | 0.7919815092956077 | T | T | T |
| 0.7985754245976677 | 0.4291207719044638 | 0.6155426856660056 | T | T | T |
| 0.7041078535554179 | 0.4232130157393130 | 0.4733181460192751 | T | T | T |

**Structure files (CONTCAR) involved in this work:**

|                    |                    |                    |   |   |   |
|--------------------|--------------------|--------------------|---|---|---|
| 0.6051106504237952 | 0.4299786449308775 | 0.6054337477487768 | T | T | T |
| 0.6067276656688850 | 0.4442886638620352 | 0.8026048374336961 | T | T | T |
| 0.7323316068250241 | 0.4779585550264581 | 0.7687265020750610 | T | T | T |
| 0.8634072546414371 | 0.6781606471898413 | 0.7562350684384721 | T | T | T |
| 0.8148505946710862 | 0.6478462131791162 | 0.5644862217477333 | T | T | T |
| 0.6943105082297423 | 0.6468444408938441 | 0.4793076020718010 | T | T | T |
| 0.5902117625813164 | 0.6685640494084730 | 0.5997104730535013 | T | T | T |
| 0.5969468358284640 | 0.6593794378082405 | 0.7963459307922091 | T | T | T |
| 0.7228591003630428 | 0.6439899051327451 | 0.7412005455345456 | T | T | T |
| 0.8320769318724617 | 0.5482241413453849 | 0.6870809551098138 | T | T | T |
| 0.5829651836132435 | 0.5487834923323824 | 0.6833056688971815 | T | T | T |
| 0.9332455905908350 | 0.3771357379429163 | 0.9274766969930309 | T | T | T |
| 0.9157356124035245 | 0.5104212822257546 | 0.9378548568483787 | T | T | T |
| 0.9034802034656828 | 0.6422111648952734 | 0.9405247232177391 | T | T | T |
| 0.7018188635793596 | 0.3737171012180179 | 0.8872465744758995 | T | T | T |
| 0.6797901144844255 | 0.5003212089737579 | 0.9463085126916357 | T | T | T |
| 0.6867672021731126 | 0.6347664645041604 | 0.9358585745490988 | T | T | T |
| 0.4925259959151340 | 0.4506969290145165 | 0.7096666366329177 | T | T | T |
| 0.4827498928613334 | 0.6334996791422152 | 0.7057756423504944 | T | T | T |
| 0.6459426392952965 | 0.9410511066088333 | 0.2884035966954500 | T | T | T |
| 0.7009927043637222 | 0.9313935084773014 | 0.1108670221721363 | T | T | T |
| 0.8019418618681531 | 0.9434687742147349 | 0.9811124082623308 | T | T | T |
| 0.9007356316673696 | 0.9283874809896894 | 0.1142067053016897 | T | T | T |
| 0.9002039457698117 | 0.9488757174528230 | 0.3117375737476768 | T | T | T |
| 0.7742920513449775 | 0.9669472501091735 | 0.2660562997365998 | T | T | T |
| 0.6414310747217146 | 0.1708522793461453 | 0.2546694523681469 | T | T | T |
| 0.6997219491110218 | 0.1601584173613354 | 0.0810244885342187 | T | T | T |
| 0.8112888100779987 | 0.1469972699792294 | 0.9762437199548250 | T | T | T |
| 0.9135987854145968 | 0.1685181700547613 | 0.0964203504237299 | T | T | T |
| 0.8990116947741086 | 0.1586189518915904 | 0.2936474707884416 | T | T | T |
| 0.7720952762803739 | 0.1463495458880397 | 0.2464408002016237 | T | T | T |
| 0.6845184755452298 | 0.0520593037350167 | 0.1942915155433805 | T | T | T |
| 0.9200786960648352 | 0.0495833012984927 | 0.1831516716564460 | T | T | T |
| 0.5723026142046449 | 0.8748766121940490 | 0.4191742301036884 | T | T | T |
| 0.5856437832504661 | 0.0061124996804506 | 0.4395046106001705 | T | T | T |
| 0.5978455283149031 | 0.1386594921246323 | 0.4366660408983428 | T | T | T |
| 0.8113253988041882 | 0.8712434396740356 | 0.3966497377155176 | T | T | T |
| 0.8175544980577995 | 0.9992780194000650 | 0.4482066618922728 | T | T | T |
| 0.8106745740259153 | 0.1333156203154936 | 0.4368590480842228 | T | T | T |
| 0.0126855006061515 | 0.9546839110520757 | 0.2177329209127677 | T | T | T |
| 0.0170740470909522 | 0.1377399810229727 | 0.2107568019512266 | T | T | T |
| 0.8602415442222586 | 0.0543603704509609 | 0.7859376242919790 | T | T | T |
| 0.8028347609407963 | 0.0717674945723620 | 0.6105169312047553 | T | T | T |
| 0.7026889181536612 | 0.0610776479641953 | 0.4784154605245636 | T | T | T |
| 0.6021878678706256 | 0.0747646047182075 | 0.6082757947785817 | T | T | T |
| 0.6054220714958449 | 0.0501099176986168 | 0.8051088637236311 | T | T | T |
| 0.7314481235157211 | 0.0288601159959408 | 0.7638698668636612 | T | T | T |
| 0.8617908263329871 | 0.8339773209495064 | 0.7647139223696379 | T | T | T |
| 0.8071649352894800 | 0.8316671027727462 | 0.5880675148683175 | T | T | T |
| 0.6949406677395491 | 0.8515149803067094 | 0.4861436650852490 | T | T | T |
| 0.5907681808116587 | 0.8281938495434130 | 0.6041216995339870 | T | T | T |
| 0.6047689633547161 | 0.8509878419417936 | 0.7986451331197445 | T | T | T |
| 0.7316306276839186 | 0.8580845725033880 | 0.7466147605113792 | T | T | T |

**Structure files (CONTCAR) involved in this work:**

|                    |                    |                    |   |   |   |
|--------------------|--------------------|--------------------|---|---|---|
| 0.8201740401998306 | 0.9478956420514161 | 0.6819278890857062 | T | T | T |
| 0.5819102636668335 | 0.9521089672732296 | 0.6726167141121988 | T | T | T |
| 0.9343356368268542 | 0.1260954130650410 | 0.9097784658343379 | T | T | T |
| 0.9196815270877671 | 0.9964860482029757 | 0.9446115743267358 | T | T | T |
| 0.9065827607864089 | 0.8638839027893198 | 0.9451026574838830 | T | T | T |
| 0.6949202290340425 | 0.1286838121160646 | 0.8875304279908323 | T | T | T |
| 0.6856543290129796 | 0.0016545870836530 | 0.9459520014028426 | T | T | T |
| 0.6968368539307801 | 0.8674753810728458 | 0.9392139498759445 | T | T | T |
| 0.4916461865220650 | 0.0470168381726362 | 0.7149709469210248 | T | T | T |
| 0.4861511288648495 | 0.8638442263792594 | 0.7145334468928716 | T | T | T |
| 0.3609172842247859 | 0.4321803739487320 | 0.7138016595624656 | T | T | T |
| 0.3114909039167101 | 0.4388870772501028 | 0.8956228784407565 | T | T | T |
| 0.2037624996885379 | 0.4588714985122629 | 0.0106522048897669 | T | T | T |
| 0.0954239320390133 | 0.4332787219789504 | 0.9025899456265644 | T | T | T |
| 0.1021067322651915 | 0.4368711825232472 | 0.7042831114829787 | T | T | T |
| 0.2305135177759727 | 0.4575519905228932 | 0.7439590401605432 | T | T | T |
| 0.3599263358706034 | 0.6740311519078410 | 0.7472401749977948 | T | T | T |
| 0.3035280910005494 | 0.6437571534840610 | 0.9173820772848981 | T | T | T |
| 0.1915287261658812 | 0.6458110504734645 | 0.0214215760359915 | T | T | T |
| 0.0925235844353690 | 0.6692505999549379 | 0.8952338324992707 | T | T | T |
| 0.1036925821058697 | 0.6584820639557520 | 0.6992161085163235 | T | T | T |
| 0.2300084506309993 | 0.6451456418205387 | 0.7528229341472996 | T | T | T |
| 0.3220058844199257 | 0.5496602855951359 | 0.7811727014823300 | T | T | T |
| 0.0849132506194406 | 0.5492031980899773 | 0.8082534036406167 | T | T | T |
| 0.4345995129699215 | 0.3755668652371884 | 0.5722174145894644 | T | T | T |
| 0.4185744000312919 | 0.5073588290084584 | 0.5703426834184209 | T | T | T |
| 0.3900604870857901 | 0.6378542323914611 | 0.5620492148149948 | T | T | T |
| 0.1940797301945286 | 0.3643331544508179 | 0.6133384264383080 | T | T | T |
| 0.1774165805030883 | 0.4949784930715684 | 0.5694091754008762 | T | T | T |
| 0.1938969474892715 | 0.6284739833419839 | 0.5616567121633224 | T | T | T |
| 0.9873610220825987 | 0.4574854401470547 | 0.7912399678056097 | T | T | T |
| 0.9865991327409946 | 0.6368714035007645 | 0.7838422316040594 | T | T | T |
| 0.1412496073342168 | 0.5691658792207924 | 0.2200782040279117 | T | T | T |
| 0.1934144940956255 | 0.5568103575150486 | 0.3984410191055051 | T | T | T |
| 0.2958244127267655 | 0.5455585814365785 | 0.5272943995426826 | T | T | T |
| 0.3941653886478552 | 0.5679486765658308 | 0.3975767573434172 | T | T | T |
| 0.3984039332204091 | 0.5595576152244471 | 0.2013970771113461 | T | T | T |
| 0.2710150181984007 | 0.5404264653215511 | 0.2419994000389609 | T | T | T |
| 0.1456029649080944 | 0.3223163406193975 | 0.2461671326687423 | T | T | T |
| 0.1963371865887946 | 0.3570648624956327 | 0.4185746488590688 | T | T | T |
| 0.3103107781180761 | 0.3528338537436619 | 0.5174999737442306 | T | T | T |
| 0.4093360575059795 | 0.3271502177425599 | 0.3895493702213867 | T | T | T |
| 0.3961334182544362 | 0.3429392565026203 | 0.1928403621611889 | T | T | T |
| 0.2733969381036782 | 0.3543852033682895 | 0.2570134230954168 | T | T | T |
| 0.1790313608680413 | 0.4488640885085420 | 0.2793834492065367 | T | T | T |
| 0.4098538012994806 | 0.4488175406508824 | 0.3134176696418891 | T | T | T |
| 0.0668963215778801 | 0.6232359356803254 | 0.0780667493638336 | T | T | T |
| 0.0841437392312186 | 0.4918138940188243 | 0.0807462149076614 | T | T | T |
| 0.1179176366393653 | 0.3627237830226592 | 0.0616795897252367 | T | T | T |
| 0.3083936593705823 | 0.6347970941783393 | 0.1127290475188389 | T | T | T |
| 0.3212670948176374 | 0.5045388886367207 | 0.0650164171796729 | T | T | T |
| 0.2988274501792846 | 0.3713138799070554 | 0.0624872993312118 | T | T | T |
| 0.5077174311358106 | 0.5376287875947032 | 0.3020842028382151 | T | T | T |



**Structure files (CONTCAR) involved in this work:**

|                     |                    |                    |   |   |   |
|---------------------|--------------------|--------------------|---|---|---|
| 0.5123372404818133  | 0.3656340859987326 | 0.2767799920144835 | T | T | T |
| 0.4383306268054404  | 0.7504483859469463 | 0.6372573459530109 | T | T | T |
| 0.1929268982503039  | 0.7494252744154895 | 0.6387713781670543 | T | T | T |
| 0.2756855758744618  | 0.7497673868979206 | 0.0294683820295436 | T | T | T |
| 0.1081273613844025  | 0.7480856526415702 | 0.0513203426517557 | T | T | T |
| 0.0699692834769284  | 0.2477860652031842 | 0.1285927905539188 | T | T | T |
| 0.3072896230225238  | 0.2503325590778858 | 0.1390942766038612 | T | T | T |
| 0.2256942973278297  | 0.2496488717299757 | 0.5277521977249686 | T | T | T |
| 0.3939077634286830  | 0.2504677664315978 | 0.5476747679900634 | T | T | T |
| 0.5572770363034372  | 0.2501530636963356 | 0.3518908290123673 | T | T | T |
| 0.8133981582191414  | 0.2527137299646635 | 0.3541432938179491 | T | T | T |
| 0.7288757427961818  | 0.2500308844803590 | 0.9401310722682287 | T | T | T |
| 0.8940757122669081  | 0.2498347808296354 | 0.9418375393625368 | T | T | T |
| 0.9479877187967135  | 0.7534963095171586 | 0.8591865141179400 | T | T | T |
| 0.6874289032139671  | 0.7515948798346468 | 0.8482496841650351 | T | T | T |
| 0.7772543001316553  | 0.7490429029782162 | 0.4418090143124694 | T | T | T |
| 0.6120318159274113  | 0.7501051978913579 | 0.4479430583188787 | T | T | T |
| 0.9318260679550165  | 0.4797766593035297 | 0.5257792062887897 | T | T | T |
| 0.9224067804192786  | 0.4326452623865812 | 0.3966133780745217 | T | T | T |
| 0.8829631647487147  | 0.5649760772201354 | 0.5557207949978910 | T | T | T |
| -0.0350617602387321 | 0.6685698117578943 | 0.6022401077064234 | T | T | T |
| 0.0167158123335721  | 0.5942622427746527 | 0.5691401677915092 | T | T | T |
| 1.0001253422095666  | 0.4428128084006673 | 0.3697876034569250 | T | T | T |
| 0.9718676364516946  | 0.4689821787795043 | 0.5641548214413324 | T | T | T |
| -0.0694621226380939 | 0.6790423739985002 | 0.4233747904742829 | T | T | T |
| -0.0178384320832723 | 0.6044431708588177 | 0.3909048544791431 | T | T | T |
| -0.0196173703302825 | 0.6321213256635260 | 0.5457704101310517 | T | T | T |
| -0.0370140167859987 | 0.6382800236550796 | 0.4485451790820462 | T | T | T |

**Figure 4(b) Route(a)-Cu ①**

Si O Al Cu C H

1.0000000000000000

20.0219993591000005 0.0000000000000000 0.0000000000000000

0.0000000000000000 19.8990001678000006 0.0000000000000000

0.0000000000000000 0.0000000000000000 13.3830003737999998

93 195 3 3 2 7

Selective dynamics

Direct

|                    |                    |                    |   |   |   |
|--------------------|--------------------|--------------------|---|---|---|
| 0.4228167551894634 | 0.0545020086035881 | 0.6382603212405609 | T | T | T |
| 0.3024221388419872 | 0.0262866167870042 | 0.7821838410436620 | T | T | T |
| 0.2804628500591627 | 0.0636752180902226 | 0.0025246283431977 | T | T | T |
| 0.1209916290630737 | 0.0654459388298675 | 0.0033384210301446 | T | T | T |
| 0.0715310631062978 | 0.0294478517093998 | 0.7930131313848138 | T | T | T |
| 0.1787483937592559 | 0.0525741793575414 | 0.6419270728736717 | T | T | T |
| 0.4221075748246522 | 0.8265818105714996 | 0.6625205667818591 | T | T | T |
| 0.3029581621670490 | 0.8687088837761767 | 0.8021210168058026 | T | T | T |
| 0.2681407827660470 | 0.8284957335772265 | 0.0226968843731640 | T | T | T |
| 0.1135835080133060 | 0.8261849223072880 | 0.0128127762844632 | T | T | T |
| 0.0658905822605980 | 0.8738162320554018 | 0.8012579379447536 | T | T | T |
| 0.1791927271782487 | 0.8279595104920058 | 0.6671152727635405 | T | T | T |
| 0.0770237791447687 | 0.9448534662101742 | 0.1416302597994630 | T | T | T |
| 0.1982547897869203 | 0.9727428363253121 | 0.2867523851066728 | T | T | T |
| 0.2180840760613201 | 0.9330908643108800 | 0.5057095329255947 | T | T | T |

**Structure files (CONTCAR) involved in this work:**

|                    |                    |                    |   |   |   |
|--------------------|--------------------|--------------------|---|---|---|
| 0.3774425920934740 | 0.9304108302162098 | 0.5069251066137497 | T | T | T |
| 0.4288050494183517 | 0.9700053945078585 | 0.2977182232703774 | T | T | T |
| 0.3216965473720467 | 0.9477160069377233 | 0.1447750163460558 | T | T | T |
| 0.0778527743574523 | 0.1695097502766782 | 0.1612828609015964 | T | T | T |
| 0.1966170087851964 | 0.1293034161630437 | 0.3038157852870464 | T | T | T |
| 0.2323663827927870 | 0.1726707332192281 | 0.5197789600945182 | T | T | T |
| 0.3866905874693262 | 0.1732530365869229 | 0.5065616173249670 | T | T | T |
| 0.4341047253358170 | 0.1271995543104553 | 0.2964194197443175 | T | T | T |
| 0.3177848676699112 | 0.1684660700054101 | 0.1642379441950141 | T | T | T |
| 0.5746619518590484 | 0.5558750300176145 | 0.3552511613321190 | T | T | T |
| 0.6952227190564637 | 0.5303419915087098 | 0.2169985168258982 | T | T | T |
| 0.7144176086645121 | 0.5500902151676476 | 0.9851346910668578 | T | T | T |
| 0.8725320166132855 | 0.5684536058642116 | 0.9956430412825614 | T | T | T |
| 0.9290919459541729 | 0.5229401075259411 | 0.2019256868953096 | T | T | T |
| 0.8192477784544089 | 0.5605603673983355 | 0.3458082525949285 | T | T | T |
| 0.5798306257171573 | 0.3254477059123259 | 0.3303680571124484 | T | T | T |
| 0.7042877846192042 | 0.3718322798597107 | 0.2105611747612615 | T | T | T |
| 0.7310134027938031 | 0.3276371309221009 | 0.9910363601003530 | T | T | T |
| 0.8881608939641841 | 0.3278236527710725 | 0.9960277820113573 | T | T | T |
| 0.9366264810197739 | 0.3660853707740725 | 0.2064654885833369 | T | T | T |
| 0.8253910829921228 | 0.3282449461588057 | 0.3471265136818010 | T | T | T |
| 0.9239611694651240 | 0.4475955938338576 | 0.8635610777418299 | T | T | T |
| 0.8033828247211160 | 0.4665660843291423 | 0.7226916692790389 | T | T | T |
| 0.7801288366644533 | 0.4426745850499972 | 0.4971512003480434 | T | T | T |
| 0.6199165324785054 | 0.4300118646611406 | 0.4919156510613790 | T | T | T |
| 0.5627447362288752 | 0.4640251076992241 | 0.7021996946429664 | T | T | T |
| 0.6764228116515175 | 0.4284039741970839 | 0.8403861983802191 | T | T | T |
| 0.7953674926610333 | 0.6240767615779133 | 0.7145731532827541 | T | T | T |
| 0.6121617545952217 | 0.6698872414472213 | 0.4873942437585031 | T | T | T |
| 0.5605929387754932 | 0.6217914229890198 | 0.6990994423941168 | T | T | T |
| 0.6687499985504699 | 0.6666759939538509 | 0.8344529794904966 | T | T | T |
| 0.5750933737110713 | 0.9399934383879266 | 0.3509315171549406 | T | T | T |
| 0.6935589869058789 | 0.9711601238962654 | 0.2084102626059783 | T | T | T |
| 0.7192386133122785 | 0.9515029141518129 | 0.9849208893381448 | T | T | T |
| 0.8766739181108462 | 0.9450573714638268 | 0.9814397947311476 | T | T | T |
| 0.9327741614672875 | 0.9680280846963369 | 0.1929774074264355 | T | T | T |
| 0.8176358240475522 | 0.9302642547075541 | 0.3263377730405508 | T | T | T |
| 0.5802022742706774 | 0.1707313530957339 | 0.3199565822031533 | T | T | T |
| 0.7021131026703740 | 0.1275719172253673 | 0.2008902937179755 | T | T | T |
| 0.7348032766996287 | 0.1676137520130065 | 0.9812618148418085 | T | T | T |
| 0.8920115282814852 | 0.1765495369616949 | 0.9754007413992921 | T | T | T |
| 0.9333303823329148 | 0.1259211791283897 | 0.1943527997406186 | T | T | T |
| 0.8226887965149265 | 0.1738165010350538 | 0.3381967959259259 | T | T | T |
| 0.9257167057001345 | 0.0631604473015615 | 0.8401486689466775 | T | T | T |
| 0.8055798389644276 | 0.0306116692718193 | 0.7033074726219184 | T | T | T |
| 0.7838861355827133 | 0.0526812969407221 | 0.4758578313729488 | T | T | T |
| 0.6237718329239709 | 0.0652745178980319 | 0.4804299248053721 | T | T | T |
| 0.5676435146687903 | 0.0337945450896440 | 0.6906492537288721 | T | T | T |
| 0.6814957287439272 | 0.0666543118434107 | 0.8279664257792424 | T | T | T |
| 0.9181762731060767 | 0.8348943335033696 | 0.8250960965437142 | T | T | T |
| 0.8007790243817459 | 0.8738875258932288 | 0.6978889881143989 | T | T | T |
| 0.7672916350137075 | 0.8333714179308412 | 0.4834643461412728 | T | T | T |
| 0.6117741676986147 | 0.8255363248062668 | 0.4888596947713437 | T | T | T |

**Structure files (CONTCAR) involved in this work:**

|                    |                    |                    |   |   |   |
|--------------------|--------------------|--------------------|---|---|---|
| 0.5658909416224395 | 0.8757196806056775 | 0.7020630068790409 | T | T | T |
| 0.4189976744911884 | 0.4438869567152611 | 0.6465819927954012 | T | T | T |
| 0.2984049360751101 | 0.4729598479213549 | 0.7883757420803339 | T | T | T |
| 0.2799498352117326 | 0.4348005107954433 | 0.0100049762061873 | T | T | T |
| 0.1212595263149975 | 0.4318497790802634 | 0.0102431705773793 | T | T | T |
| 0.0699244595444513 | 0.4694427072156264 | 0.8003247000363447 | T | T | T |
| 0.1755279922463085 | 0.4460777890447579 | 0.6480521819254745 | T | T | T |
| 0.4179503200593808 | 0.6713937068212825 | 0.6605730879725515 | T | T | T |
| 0.3001815513365339 | 0.6298700273515611 | 0.8028546730274744 | T | T | T |
| 0.2684135544293863 | 0.6720786668024504 | 0.0238741667234684 | T | T | T |
| 0.1148210022829091 | 0.6720787478375917 | 0.0119057248476224 | T | T | T |
| 0.0625678932498032 | 0.6272975275002870 | 0.8013160725124771 | T | T | T |
| 0.1772089932775093 | 0.6690455361657337 | 0.6663360944051456 | T | T | T |
| 0.0739066391946951 | 0.5544186772125852 | 0.1416962164153760 | T | T | T |
| 0.1955964947971264 | 0.5265363785457380 | 0.2844307829324045 | T | T | T |
| 0.2148114893909839 | 0.5629132478061284 | 0.5071992567044026 | T | T | T |
| 0.3741860026355530 | 0.5654221454242278 | 0.5092370959915815 | T | T | T |
| 0.4282213102276130 | 0.5258832096773178 | 0.2995466820370939 | T | T | T |
| 0.3222524062936357 | 0.5536776340240669 | 0.1461609073219180 | T | T | T |
| 0.0802579539884238 | 0.3240151267583717 | 0.1638514253037789 | T | T | T |
| 0.1977465978926302 | 0.3681194697211964 | 0.3035550473514207 | T | T | T |
| 0.2323199488515193 | 0.3286208552823813 | 0.5229617399537694 | T | T | T |
| 0.3870196409032227 | 0.3258800067437700 | 0.5114421731804153 | T | T | T |
| 0.4358735897328719 | 0.3687498140620116 | 0.2986186232814227 | T | T | T |
| 0.3195058027673017 | 0.3270807576204416 | 0.1680551935962388 | T | T | T |
| 0.3572992652177320 | 0.0599464074949423 | 0.7088496688980820 | T | T | T |
| 0.3004746293942780 | 0.0691734107150316 | 0.8854807346129221 | T | T | T |
| 0.2005094594468938 | 0.0529945719738533 | 0.0166924736947495 | T | T | T |
| 0.1009537964710234 | 0.0724509285909733 | 0.8866277689383665 | T | T | T |
| 0.1041533185349432 | 0.0541343889661569 | 0.6885187963177960 | T | T | T |
| 0.2296078978626647 | 0.0290425420369068 | 0.7296133146705652 | T | T | T |
| 0.3593545489389194 | 0.8290301740524015 | 0.7392100388439522 | T | T | T |
| 0.3033216543316228 | 0.8391588106900668 | 0.9149250864941655 | T | T | T |
| 0.1904220602290487 | 0.8524841739741448 | 0.0166119879472040 | T | T | T |
| 0.0866568636671907 | 0.8303466560221098 | 0.8992072505071989 | T | T | T |
| 0.1026131575549825 | 0.8411722161634154 | 0.7038956087317882 | T | T | T |
| 0.2296586807326673 | 0.8572403079008777 | 0.7522734693390362 | T | T | T |
| 0.3208006691718043 | 0.9483409623129418 | 0.8049309258760219 | T | T | T |
| 0.0901035088039163 | 0.9512703205488181 | 0.8151198625090683 | T | T | T |
| 0.4316026562718485 | 0.1236447255384380 | 0.5747844429005754 | T | T | T |
| 0.4171560494434528 | 0.9919627950492224 | 0.5603676995593023 | T | T | T |
| 0.4003741448540033 | 0.8594861014008448 | 0.5558149226369863 | T | T | T |
| 0.1955299763592216 | 0.1278242274114589 | 0.6037695850010154 | T | T | T |
| 0.1810556228000173 | 0.9996800140326797 | 0.5494613117647262 | T | T | T |
| 0.1917191862284978 | 0.8653707280339924 | 0.5606816063872111 | T | T | T |
| 0.9921081004030804 | 0.0418008601059331 | 0.7794393252868643 | T | T | T |
| 0.9856963447967435 | 0.8739496275405861 | 0.7881611130197756 | T | T | T |
| 0.1426001959966803 | 0.9420897547576581 | 0.2119553240852264 | T | T | T |
| 0.2008438559482813 | 0.9270469852870659 | 0.3873290665697700 | T | T | T |
| 0.2978766732316505 | 0.9417436530767325 | 0.5240002190370546 | T | T | T |
| 0.3946334168176175 | 0.9279146178789115 | 0.3885657195820042 | T | T | T |
| 0.3963098489528519 | 0.9485307249228473 | 0.1914023369845557 | T | T | T |
| 0.2702795345152309 | 0.9717962021103107 | 0.2316706045397412 | T | T | T |

**Structure files (CONTCAR) involved in this work:**

|                    |                    |                    |   |   |   |
|--------------------|--------------------|--------------------|---|---|---|
| 0.1396824302276838 | 0.1661063847117753 | 0.2384027558479952 | T | T | T |
| 0.1956931189408034 | 0.1648722400920809 | 0.4124236722038434 | T | T | T |
| 0.3094473358432772 | 0.1477073287083238 | 0.5092155951183407 | T | T | T |
| 0.4129587807809138 | 0.1730366942471037 | 0.3918303751498145 | T | T | T |
| 0.3947474041677915 | 0.1540229411812111 | 0.1975649082884467 | T | T | T |
| 0.2693025248369900 | 0.1384028680324299 | 0.2512745042586147 | T | T | T |
| 0.1796692567725613 | 0.0499034100711437 | 0.3152433291456044 | T | T | T |
| 0.4154314904119358 | 0.0494275648602015 | 0.3195288279794879 | T | T | T |
| 0.0681665672013212 | 0.8723502540052340 | 0.0865954161122801 | T | T | T |
| 0.0820388272241863 | 0.0028952428545474 | 0.0560027915076114 | T | T | T |
| 0.0986608724519122 | 0.1352967167861646 | 0.0559188065851735 | T | T | T |
| 0.3056306511465204 | 0.8718595152468542 | 0.1081277595974790 | T | T | T |
| 0.3183136598350116 | 0.9989862616128405 | 0.0503785855274429 | T | T | T |
| 0.3029010710866392 | 0.1328243148048391 | 0.0574887081046788 | T | T | T |
| 0.5076189988689329 | 0.9538449960552001 | 0.2875436893222195 | T | T | T |
| 0.5139294035108287 | 0.1334645763136238 | 0.2770170974310868 | T | T | T |
| 0.6345047484660195 | 0.5668692102927900 | 0.2741863091852889 | T | T | T |
| 0.6873865504786119 | 0.5445438277942360 | 0.0983666234794461 | T | T | T |
| 0.7946996906712132 | 0.5484815416567040 | 0.9787062622733582 | T | T | T |
| 0.8915206659314084 | 0.5630896346497349 | 0.1132374047042135 | T | T | T |
| 0.8940371586384690 | 0.5446790390755833 | 0.3072989775478025 | T | T | T |
| 0.7660870718203940 | 0.5626704403267069 | 0.2547790172148474 | T | T | T |
| 0.6427214475084221 | 0.3288298243029958 | 0.2543247068565965 | T | T | T |
| 0.7031176037912602 | 0.3646421677771309 | 0.0905922971505916 | T | T | T |
| 0.8096715945204591 | 0.3469276607449576 | 0.9819085060373643 | T | T | T |
| 0.9079555281948231 | 0.3221424607391774 | 0.1137491862207035 | T | T | T |
| 0.9017082747106232 | 0.3416752778632747 | 0.3096345791187398 | T | T | T |
| 0.7749258694403428 | 0.3448577441838323 | 0.2545075067858006 | T | T | T |
| 0.6955118298986390 | 0.4505294769793965 | 0.2415812671694264 | T | T | T |
| 0.9173249165076945 | 0.4439413668960984 | 0.1837429819966317 | T | T | T |
| 0.5619940996486680 | 0.6238803874184627 | 0.4189979841908475 | T | T | T |
| 0.5925186924427853 | 0.4940774213366830 | 0.4297357126004261 | T | T | T |
| 0.6008493305415938 | 0.3606237379677227 | 0.4351455076131098 | T | T | T |
| 0.8229756344782556 | 0.6396703535773879 | 0.3923331650542590 | T | T | T |
| 0.7963876463379537 | 0.5108449318650271 | 0.4331690497641345 | T | T | T |
| 0.8101958551674844 | 0.3770751836271308 | 0.4413524167627347 | T | T | T |
| 0.0068724858412093 | 0.5442923172037381 | 0.2093888656075397 | T | T | T |
| 0.0169766125039116 | 0.3605045145769400 | 0.2180893012092171 | T | T | T |
| 0.8608893527837437 | 0.4313531758494184 | 0.7909865895210684 | T | T | T |
| 0.8159061896475606 | 0.4498199299184303 | 0.6050935712083774 | T | T | T |
| 0.7001075128046763 | 0.4359909852090548 | 0.5062616352982162 | T | T | T |
| 0.5848361826000228 | 0.4262323705183167 | 0.6002507258600766 | T | T | T |
| 0.6011651996937467 | 0.4294671636651327 | 0.7961648809172631 | T | T | T |
| 0.7302324081843177 | 0.4358334800310206 | 0.7504209351740325 | T | T | T |
| 0.8439058731721799 | 0.6711037179065198 | 0.7772502734405242 | T | T | T |
| 0.8034347529393803 | 0.6289565882051554 | 0.5960976172183768 | T | T | T |
| 0.6875766736527295 | 0.6442352729610378 | 0.4696424910250152 | T | T | T |
| 0.5896590112465878 | 0.6626221464125318 | 0.6043476163542379 | T | T | T |
| 0.5919904023114553 | 0.6533302274825552 | 0.8023104773656209 | T | T | T |
| 0.7172481445319107 | 0.6434228235555716 | 0.7457624912926888 | T | T | T |
| 0.8055446932495630 | 0.5455550130833636 | 0.7484416302869019 | T | T | T |
| 0.5823347968447774 | 0.5431121743152989 | 0.6935184632581763 | T | T | T |
| 0.9325937203763786 | 0.3857161768756831 | 0.9425058361196108 | T | T | T |

**Structure files (CONTCAR) involved in this work:**

|                    |                    |                    |   |   |   |
|--------------------|--------------------|--------------------|---|---|---|
| 0.9159642911686270 | 0.5174137551243688 | 0.9273120117835308 | T | T | T |
| 0.8906678381515011 | 0.6471632120564548 | 0.9683903351247787 | T | T | T |
| 0.6892023532179576 | 0.3576634024213333 | 0.8973771529971160 | T | T | T |
| 0.6829986392606592 | 0.4912403827211547 | 0.9181968550859346 | T | T | T |
| 0.6854746985735916 | 0.6235289540381731 | 0.9414524748225085 | T | T | T |
| 0.4830065140047582 | 0.4551035625419321 | 0.7194891730428857 | T | T | T |
| 0.4800093573510755 | 0.6282622918828588 | 0.7064853132518972 | T | T | T |
| 0.6364353504402493 | 0.9327072029749953 | 0.2719247785681775 | T | T | T |
| 0.6792998087988906 | 0.9634566085058914 | 0.0892421695866493 | T | T | T |
| 0.7987092927033513 | 0.9632878673560866 | 0.0045425317965739 | T | T | T |
| 0.9142471490346232 | 0.9326257413414344 | 0.0871408354931938 | T | T | T |
| 0.8936130139616796 | 0.9307295448027298 | 0.2833967640027986 | T | T | T |
| 0.7660709842383728 | 0.9374204772744928 | 0.2318516598932402 | T | T | T |
| 0.6358134149642602 | 0.1698898183911592 | 0.2311302690251949 | T | T | T |
| 0.7113031188748430 | 0.1273922317907361 | 0.0807569485606389 | T | T | T |
| 0.8139235913287552 | 0.1554789558416354 | 0.9615535249801238 | T | T | T |
| 0.9131412110402912 | 0.1627921927456104 | 0.0905292780856633 | T | T | T |
| 0.8960331589829374 | 0.1618978716004371 | 0.2882989289470594 | T | T | T |
| 0.7672150942144979 | 0.1624210197086897 | 0.2509931561407965 | T | T | T |
| 0.6942296614343052 | 0.0504443684778736 | 0.2397691703568954 | T | T | T |
| 0.9117613931526113 | 0.0471657974620459 | 0.1898486305737752 | T | T | T |
| 0.5651693521017443 | 0.8719318840694616 | 0.4162863782883659 | T | T | T |
| 0.5873079671315931 | 0.0027369891621739 | 0.4259353645506798 | T | T | T |
| 0.6093549092874345 | 0.1342443705802968 | 0.4191323905209909 | T | T | T |
| 0.8056909082350847 | 0.8593859084599926 | 0.3825643806392641 | T | T | T |
| 0.8072996284088172 | 0.9934946422773302 | 0.4009181652075862 | T | T | T |
| 0.8100603203353337 | 0.1243070621189104 | 0.4321331912185097 | T | T | T |
| 0.0124528729617567 | 0.9589099723418768 | 0.2121698446985514 | T | T | T |
| 0.0136267745561423 | 0.1320185307026581 | 0.2107764438840308 | T | T | T |
| 0.8639365068250942 | 0.0707221052248184 | 0.7631358942602854 | T | T | T |
| 0.8173776696448054 | 0.0414682963515278 | 0.5847236316058204 | T | T | T |
| 0.7034043050234451 | 0.0522864207217850 | 0.4864908852154626 | T | T | T |
| 0.5927527018594744 | 0.0737800046017697 | 0.5914165669244200 | T | T | T |
| 0.6054556701905142 | 0.0657186360535131 | 0.7872537906370224 | T | T | T |
| 0.7333300721884035 | 0.0621732026917879 | 0.7345727768691452 | T | T | T |
| 0.8684986941357083 | 0.8334176508107199 | 0.7292275765244253 | T | T | T |
| 0.7969463540511443 | 0.8764786940302173 | 0.5766270642641529 | T | T | T |
| 0.6880594110535950 | 0.8510670294121292 | 0.4721738026144444 | T | T | T |
| 0.5906592564075120 | 0.8319382266307773 | 0.6054312051097717 | T | T | T |
| 0.6008297544957228 | 0.8520246926338496 | 0.8040715065100421 | T | T | T |
| 0.7364553894736461 | 0.8393960995553144 | 0.7467792889159197 | T | T | T |
| 0.8085466965421860 | 0.9521858457619888 | 0.7359576435541765 | T | T | T |
| 0.5836816936734424 | 0.9544483490392794 | 0.6781856498311867 | T | T | T |
| 0.9376577052704682 | 0.1344029726743955 | 0.8973159814634971 | T | T | T |
| 0.9116466897304137 | 0.0077923619234903 | 0.9264457230481120 | T | T | T |
| 0.8814823594723101 | 0.8772099462758668 | 0.9156277127004208 | T | T | T |
| 0.6930603791385395 | 0.1367491574951767 | 0.8882329201129191 | T | T | T |
| 0.6912737777432031 | 0.0013177674247886 | 0.9002157014126074 | T | T | T |
| 0.7105027088638726 | 0.8718430778328092 | 0.9523571701129154 | T | T | T |
| 0.4881606817883338 | 0.0455013873482299 | 0.7082677290554376 | T | T | T |
| 0.4846644084093554 | 0.8667083863088522 | 0.7109772891960624 | T | T | T |
| 0.3524481722111399 | 0.4380528406042135 | 0.7147269984129779 | T | T | T |
| 0.2955204984726892 | 0.4297687465640282 | 0.8913739052328818 | T | T | T |

**Structure files (CONTCAR) involved in this work:**

|                    |                    |                    |   |   |   |
|--------------------|--------------------|--------------------|---|---|---|
| 0.2002703207916149 | 0.4443395792813559 | 0.0305192430776938 | T | T | T |
| 0.1051435936185209 | 0.4286434831359940 | 0.8920494440035615 | T | T | T |
| 0.1007846267476936 | 0.4429976637610524 | 0.6949618196739470 | T | T | T |
| 0.2256807249150499 | 0.4721731706502265 | 0.7353344068252471 | T | T | T |
| 0.3565088088371600 | 0.6691914223906678 | 0.7391513161157783 | T | T | T |
| 0.2996873695846272 | 0.6627865111084106 | 0.9132928803247619 | T | T | T |
| 0.1912473162039711 | 0.6455688310012598 | 0.0250407087578166 | T | T | T |
| 0.0929809022924452 | 0.6693158613559679 | 0.8963118640766237 | T | T | T |
| 0.1004347995998300 | 0.6562160353261823 | 0.7013174319559041 | T | T | T |
| 0.2273221428914743 | 0.6383807238067378 | 0.7510255726292633 | T | T | T |
| 0.3191991415719541 | 0.5504797976320702 | 0.8108187617272294 | T | T | T |
| 0.0843761208381388 | 0.5487137390090152 | 0.8164970677278918 | T | T | T |
| 0.4297705601672386 | 0.3742477152783491 | 0.5850140349566149 | T | T | T |
| 0.4143841670494551 | 0.5059160393174419 | 0.5673275086062709 | T | T | T |
| 0.3944146784566900 | 0.6382189386824278 | 0.5549981090705639 | T | T | T |
| 0.1965629254180776 | 0.3716301995034280 | 0.6104782885191079 | T | T | T |
| 0.1763206278598151 | 0.4982765280746718 | 0.5545197417732202 | T | T | T |
| 0.1907820301763852 | 0.6323453534470102 | 0.5594511540050765 | T | T | T |
| 0.9905200248993730 | 0.4533857977231208 | 0.7960626735835664 | T | T | T |
| 0.9833941698851485 | 0.6349539650206535 | 0.7950400696530755 | T | T | T |
| 0.1377069800649456 | 0.5592174906460670 | 0.2150538331197772 | T | T | T |
| 0.1963604842496276 | 0.5671737414659253 | 0.3893531954543986 | T | T | T |
| 0.2946939993237910 | 0.5520295419583694 | 0.5230725343462405 | T | T | T |
| 0.3942286863728788 | 0.5660788519725238 | 0.3920441293229520 | T | T | T |
| 0.3963033252785420 | 0.5515930480127089 | 0.1950048116903824 | T | T | T |
| 0.2678068836212548 | 0.5340089969578873 | 0.2312986385737709 | T | T | T |
| 0.1436405515412552 | 0.3262458565272600 | 0.2386810109464916 | T | T | T |
| 0.1944716500630370 | 0.3407324102343013 | 0.4172121297786527 | T | T | T |
| 0.3098684198954610 | 0.3520078651181403 | 0.5107946028457266 | T | T | T |
| 0.4167175126199592 | 0.3274444412030480 | 0.3989008057319974 | T | T | T |
| 0.3969491918503928 | 0.3374335008998990 | 0.2024660160320762 | T | T | T |
| 0.2719269804053438 | 0.3565450846211239 | 0.2569232646569861 | T | T | T |
| 0.1789585773352420 | 0.4474992319728863 | 0.3017190193173501 | T | T | T |
| 0.4136732273140768 | 0.4462720991823763 | 0.3147460966243111 | T | T | T |
| 0.0661889979692598 | 0.6248946934530231 | 0.0807237049643865 | T | T | T |
| 0.0794826744813563 | 0.4927920875430108 | 0.0626037911730060 | T | T | T |
| 0.0982173290219105 | 0.3609856383731205 | 0.0591552253036226 | T | T | T |
| 0.3103546193151318 | 0.6292195466640703 | 0.1051385711653558 | T | T | T |
| 0.3185457043207859 | 0.5001038966672945 | 0.0545608496701138 | T | T | T |
| 0.3056239528527478 | 0.3662736713588308 | 0.0635538523035668 | T | T | T |
| 0.5077913087503855 | 0.5388607014138121 | 0.2924294240912955 | T | T | T |
| 0.5160516991567367 | 0.3632597264243209 | 0.2795705664403260 | T | T | T |
| 0.4408510064542159 | 0.7483043776097882 | 0.6416527344648775 | T | T | T |
| 0.1920250405121205 | 0.7484220127595562 | 0.6507851720957571 | T | T | T |
| 0.2723661071962433 | 0.7503347959171361 | 0.0559393852467419 | T | T | T |
| 0.1079087461439883 | 0.7489699505196666 | 0.0520201106437778 | T | T | T |
| 0.0599796147231986 | 0.2473500826032658 | 0.1384013001740320 | T | T | T |
| 0.3044234401301901 | 0.2481642364667051 | 0.1500273049913089 | T | T | T |
| 0.2281795245704197 | 0.2503402514645183 | 0.5553083576165339 | T | T | T |
| 0.3920423073277919 | 0.2490139085946445 | 0.5513447221236518 | T | T | T |
| 0.5618202056933178 | 0.2474387788125031 | 0.3504609098635398 | T | T | T |
| 0.8173931041749458 | 0.2504409515698904 | 0.3805878365760297 | T | T | T |
| 0.7194925830033582 | 0.2472015238350276 | 0.9952736671737530 | T | T | T |

**Structure files (CONTCAR) involved in this work:**

|                    |                    |                    |   |   |   |
|--------------------|--------------------|--------------------|---|---|---|
| 0.9029686150685985 | 0.2550827063563025 | 0.9467363910809798 | T | T | T |
| 0.9354981108604485 | 0.7620529268266233 | 0.8681042002953877 | T | T | T |
| 0.6791332332940950 | 0.7417515372933905 | 0.8804516403319087 | T | T | T |
| 0.6022467398053061 | 0.7478545192765396 | 0.4546654673990523 | T | T | T |
| 0.7747056473648439 | 0.6696055525050629 | 0.0935387572705636 | T | T | T |
| 0.6905555719541475 | 0.7758782821416359 | 0.1058074454993576 | T | T | T |
| 0.8338747383142081 | 0.7929038896112335 | 0.1221821950595185 | T | T | T |
| 0.7802938109976961 | 0.7547208436018924 | 0.4954741848457745 | T | T | T |
| 0.9165560370711004 | 0.6790108284508090 | 0.8441115118324799 | T | T | T |
| 0.6797270441209798 | 0.8283142274947973 | 0.8417797392914228 | T | T | T |
| 0.7671501839985649 | 0.6702298847771990 | 0.4983969995934672 | T | T | T |
| 0.6985896419247658 | 0.7043149611390587 | 0.0269796413692936 | T | T | T |
| 0.7618527818049684 | 0.8217590549141014 | 0.0575941889414625 | T | T | T |
| 0.8612380101092538 | 0.7167831879263081 | 0.0637947592229964 | T | T | T |
| 0.9504762483444369 | 0.7481292237531764 | 0.1026489420773817 | T | T | T |
| 0.8791584970840540 | 0.6857087032435415 | 0.3700165709178319 | T | T | T |
| 0.9651526973247311 | 0.7824912026780708 | 0.0431588041193609 | T | T | T |
| 0.9450538414005019 | 0.7716588243093273 | 0.1759356738441264 | T | T | T |
| 0.9758393577322257 | 0.6992786819419863 | 0.1021190778486142 | T | T | T |
| 0.8584970284321292 | 0.7309645979385825 | 0.3350716141221259 | T | T | T |
| 0.9035369246538806 | 0.6982780185208226 | 0.4409355284863676 | T | T | T |
| 0.9143722318360408 | 0.6599026813301196 | 0.3206897213890475 | T | T | T |
| 0.7671951755806909 | 0.6818393110560381 | 0.1636536609488269 | T | T | T |

**Figure 4(b) Route(a)-Cu ②**

Si O Al Cu C H

1.0000000000000000

20.0219993591000005 0.0000000000000000 0.0000000000000000

0.0000000000000000 19.8990001678000006 0.0000000000000000

0.0000000000000000 0.0000000000000000 13.3830003737999998

93 195 3 3 2 7

Selective dynamics

Direct

|                    |                    |                    |   |   |   |
|--------------------|--------------------|--------------------|---|---|---|
| 0.4216990096584527 | 0.0536412783143162 | 0.6386414242107189 | T | T | T |
| 0.3015056704519398 | 0.0257838079427732 | 0.7832165313175240 | T | T | T |
| 0.2799489400858635 | 0.0628700864987200 | 0.0032963425789192 | T | T | T |
| 0.1204714778663976 | 0.0636879103580606 | 0.0044804592118124 | T | T | T |
| 0.0685427884940817 | 0.0255917889253163 | 0.7940725152234667 | T | T | T |
| 0.1773205478072953 | 0.0514521015847618 | 0.6432805784360499 | T | T | T |
| 0.4208254186502187 | 0.8261654412499060 | 0.6633682569914257 | T | T | T |
| 0.3015260376134509 | 0.8686203078799609 | 0.8029326217307325 | T | T | T |
| 0.2682799921810527 | 0.8272574956323896 | 0.0249226454847813 | T | T | T |
| 0.1142295251636113 | 0.8247351438757058 | 0.0175770688349864 | T | T | T |
| 0.0655038111690092 | 0.8667156205756088 | 0.8040847639599621 | T | T | T |
| 0.1790267407951253 | 0.8272742096219944 | 0.6670149197536099 | T | T | T |
| 0.0761761395066571 | 0.9436008408847022 | 0.1437597461517921 | T | T | T |
| 0.1981032436719837 | 0.9716089373113229 | 0.2863683324536687 | T | T | T |
| 0.2175387450561778 | 0.9328186333893800 | 0.5062963719836692 | T | T | T |
| 0.3767110973581506 | 0.9291533835633037 | 0.5078855502681019 | T | T | T |
| 0.4282521055520294 | 0.9695098898675047 | 0.2992654589634857 | T | T | T |
| 0.3223136841528501 | 0.9468623597546929 | 0.1444902744233885 | T | T | T |
| 0.0786785720166512 | 0.1695572866287999 | 0.1599230631594719 | T | T | T |
| 0.1964364057316401 | 0.1286304662084781 | 0.3040228792849245 | T | T | T |

**Structure files (CONTCAR) involved in this work:**

|                    |                    |                    |   |   |   |
|--------------------|--------------------|--------------------|---|---|---|
| 0.2303200912064648 | 0.1717500811871750 | 0.5213116399384904 | T | T | T |
| 0.3849130514211323 | 0.1724296386892165 | 0.5068246474862329 | T | T | T |
| 0.4335008974490863 | 0.1264359246940639 | 0.2973524189585885 | T | T | T |
| 0.3176927912461489 | 0.1678741230215517 | 0.1653002788970390 | T | T | T |
| 0.5765976261547644 | 0.5572027166428065 | 0.3568236069434952 | T | T | T |
| 0.6932959178697943 | 0.5284790447711333 | 0.2158295976855122 | T | T | T |
| 0.7142736167664587 | 0.5487036588098839 | 0.9876814693339034 | T | T | T |
| 0.8734301908199562 | 0.5644983697123245 | 0.9981211879208751 | T | T | T |
| 0.9303760790511790 | 0.5245274588737446 | 0.2061514767425761 | T | T | T |
| 0.8161917004407987 | 0.5602369087959586 | 0.3416984795484584 | T | T | T |
| 0.5790065088966597 | 0.3241457056359799 | 0.3308198621689597 | T | T | T |
| 0.7012309154958791 | 0.3715234578966645 | 0.2130979998397307 | T | T | T |
| 0.7305684639644396 | 0.3281084635202246 | 0.9920041740783380 | T | T | T |
| 0.8867413832976470 | 0.3281530747768565 | 0.9961251125242825 | T | T | T |
| 0.9348713611080706 | 0.3675820850561991 | 0.2068304228497181 | T | T | T |
| 0.8243644382542943 | 0.3290309162968164 | 0.3505007819760356 | T | T | T |
| 0.9237490782451950 | 0.4455327416229921 | 0.8614254904632224 | T | T | T |
| 0.8021182532307037 | 0.4675273622398324 | 0.7221468680377351 | T | T | T |
| 0.7801083005784148 | 0.4409841953841640 | 0.4963069863085408 | T | T | T |
| 0.6200378175006880 | 0.4298058559022438 | 0.4917204131777322 | T | T | T |
| 0.5621073663910474 | 0.4640192798571081 | 0.7024318600474414 | T | T | T |
| 0.6759871312471175 | 0.4284106604390447 | 0.8401933420004559 | T | T | T |
| 0.7923244659863823 | 0.6234369507839195 | 0.7091430256698141 | T | T | T |
| 0.6084796081152347 | 0.6702559836966627 | 0.4939097585100533 | T | T | T |
| 0.5582973975197674 | 0.6217955433662558 | 0.7053678275596678 | T | T | T |
| 0.6691654136199696 | 0.6667090686219874 | 0.8373920627845395 | T | T | T |
| 0.5743524486653691 | 0.9398424843083881 | 0.3537565676290436 | T | T | T |
| 0.6924063552977650 | 0.9708746585542872 | 0.2108442869049303 | T | T | T |
| 0.7150014329285949 | 0.9543971614795798 | 0.9870734264657026 | T | T | T |
| 0.8749028534874368 | 0.9485952526175335 | 0.9856096137762819 | T | T | T |
| 0.9326096820636541 | 0.9680383824835103 | 0.1964633248793450 | T | T | T |
| 0.8160925918363771 | 0.9292629256654302 | 0.3276767848643438 | T | T | T |
| 0.5795516166549785 | 0.1703267221283297 | 0.3214555082399497 | T | T | T |
| 0.7014746437273452 | 0.1272788096406592 | 0.2006611751520659 | T | T | T |
| 0.7344589748753954 | 0.1679107161760385 | 0.9816899580100862 | T | T | T |
| 0.8913827044426135 | 0.1763248176611730 | 0.9763470765267068 | T | T | T |
| 0.9343064385036207 | 0.1260214658307172 | 0.1953291484385996 | T | T | T |
| 0.8225451010087139 | 0.1734977298368542 | 0.3366462240740508 | T | T | T |
| 0.9232826900608154 | 0.0647851933041166 | 0.8403920147780332 | T | T | T |
| 0.8045160090941263 | 0.0294866410134302 | 0.7024748006106245 | T | T | T |
| 0.7831503244304402 | 0.0527103091950754 | 0.4755703405132139 | T | T | T |
| 0.6232224363275508 | 0.0654685185217212 | 0.4820976700330412 | T | T | T |
| 0.5665169762701679 | 0.0344690079281937 | 0.6922076906583403 | T | T | T |
| 0.6807056417144904 | 0.0690920265142639 | 0.8269897633498013 | T | T | T |
| 0.9124784271177948 | 0.8317969552194595 | 0.8347672961326558 | T | T | T |
| 0.7991126679504988 | 0.8720777444920150 | 0.6995131170593373 | T | T | T |
| 0.7671766602667249 | 0.8297236443006515 | 0.4846923113398363 | T | T | T |
| 0.6110708188089468 | 0.8249918859301809 | 0.4914778178723712 | T | T | T |
| 0.5638193413201916 | 0.8762864184188325 | 0.7034735417451442 | T | T | T |
| 0.4189483353866919 | 0.4427484128047358 | 0.6471354749113523 | T | T | T |
| 0.2988643154494684 | 0.4723878410697168 | 0.7890227049277021 | T | T | T |
| 0.2799708952368162 | 0.4346763930356162 | 0.0110108450686849 | T | T | T |
| 0.1211412346530524 | 0.4328943838011444 | 0.0107392710338117 | T | T | T |



**Structure files (CONTCAR) involved in this work:**

|                    |                    |                    |   |   |   |
|--------------------|--------------------|--------------------|---|---|---|
| 0.0693176019487312 | 0.4706416341710800 | 0.7999086977305331 | T | T | T |
| 0.1760697765089365 | 0.4463247504633455 | 0.6484961286495196 | T | T | T |
| 0.4176552613357886 | 0.6711022874673985 | 0.6650719708064343 | T | T | T |
| 0.3000028895614092 | 0.6289816028474121 | 0.8046085048931600 | T | T | T |
| 0.2675027695859525 | 0.6706490687985476 | 0.0259906340134687 | T | T | T |
| 0.1133354344380656 | 0.6714476259447199 | 0.0150126853228583 | T | T | T |
| 0.0636384046434855 | 0.6301298523475740 | 0.8004228667554024 | T | T | T |
| 0.1793378758863762 | 0.6690519509365463 | 0.6662756798230077 | T | T | T |
| 0.0739843418257386 | 0.5541804279283248 | 0.1444753877483300 | T | T | T |
| 0.1962248470667040 | 0.5259455599101998 | 0.2849849697692249 | T | T | T |
| 0.2165291918622530 | 0.5628371550640268 | 0.5068953521081704 | T | T | T |
| 0.3763016081166562 | 0.5653358740483178 | 0.5101582374360590 | T | T | T |
| 0.4309457017792872 | 0.5267470098730085 | 0.3001152614526922 | T | T | T |
| 0.3229974486939952 | 0.5525470140364768 | 0.1484199517493606 | T | T | T |
| 0.0792927845658995 | 0.3242138857016059 | 0.1628271888261395 | T | T | T |
| 0.1964708847339220 | 0.3677476431859683 | 0.3040292374636713 | T | T | T |
| 0.2311752285527792 | 0.3280609920807287 | 0.5233301107578435 | T | T | T |
| 0.3862431549341991 | 0.3252703609605989 | 0.5113066922112406 | T | T | T |
| 0.4358895535430256 | 0.3691033628361642 | 0.2987557511312158 | T | T | T |
| 0.3187098385717496 | 0.3268680301669626 | 0.1687181129526778 | T | T | T |
| 0.3561605062139743 | 0.0590138447868947 | 0.7091838414951657 | T | T | T |
| 0.2995807797494843 | 0.0691794163966851 | 0.8860956251772590 | T | T | T |
| 0.2000150811750606 | 0.0510118513986008 | 0.0171488383808351 | T | T | T |
| 0.0998652800874005 | 0.0672078587366626 | 0.8874883437834750 | T | T | T |
| 0.1025365435111128 | 0.0494794049573212 | 0.6901145267681543 | T | T | T |
| 0.2285580668289555 | 0.0280853031687840 | 0.7306996445741666 | T | T | T |
| 0.3578183948714413 | 0.8291165406992024 | 0.7396006640973020 | T | T | T |
| 0.3003306006648703 | 0.8377973316327250 | 0.9148674784031119 | T | T | T |
| 0.1906523300854043 | 0.8518873280064521 | 0.0255908379140847 | T | T | T |
| 0.0923319734185304 | 0.8268190493534708 | 0.9012727714966370 | T | T | T |
| 0.1019741756460836 | 0.8373866358734620 | 0.7046386757351792 | T | T | T |
| 0.2283216077046644 | 0.8588795235417409 | 0.7518331116515025 | T | T | T |
| 0.3202453818661976 | 0.9480686104535740 | 0.8074136131609256 | T | T | T |
| 0.0812130799068508 | 0.9462427245121871 | 0.8153730949944370 | T | T | T |
| 0.4300394825001205 | 0.1224181481565631 | 0.5743206927066253 | T | T | T |
| 0.4168700729945803 | 0.9902999606989823 | 0.5619251039183351 | T | T | T |
| 0.3994539185505797 | 0.8577753834790027 | 0.5556199057936851 | T | T | T |
| 0.1929606419282689 | 0.1273296613242733 | 0.6060265453195384 | T | T | T |
| 0.1808808144511649 | 0.9998341668710738 | 0.5493243665577290 | T | T | T |
| 0.1895864792112219 | 0.8655670001426977 | 0.5609086595591725 | T | T | T |
| 0.9892271521713648 | 0.0399766344752445 | 0.7817238716505929 | T | T | T |
| 0.9854790016323434 | 0.8549947642859377 | 0.7967961955454481 | T | T | T |
| 0.1418973572568488 | 0.9398738680347933 | 0.2134827477503580 | T | T | T |
| 0.2013935639815592 | 0.9268423656366854 | 0.3877383221134426 | T | T | T |
| 0.2972592411597664 | 0.9405873572635357 | 0.5261493656343521 | T | T | T |
| 0.3934360822500497 | 0.9271952300194845 | 0.3893559828702620 | T | T | T |
| 0.3965758583963215 | 0.9487371182043534 | 0.1921741723894985 | T | T | T |
| 0.2697987066101235 | 0.9700116476943766 | 0.2304324408853391 | T | T | T |
| 0.1406883236649593 | 0.1659100786895153 | 0.2367724260046819 | T | T | T |
| 0.1939697601251080 | 0.1627359769125777 | 0.4137274228416379 | T | T | T |
| 0.3075748317397272 | 0.1469455884296514 | 0.5111558826999303 | T | T | T |
| 0.4109036901258746 | 0.1723340174974783 | 0.3919263554702455 | T | T | T |
| 0.3947517751913746 | 0.1525687661720582 | 0.1975070511234560 | T | T | T |

**Structure files (CONTCAR) involved in this work:**

|                    |                    |                    |   |   |   |
|--------------------|--------------------|--------------------|---|---|---|
| 0.2697165168895884 | 0.1384533430874495 | 0.2535783156669589 | T | T | T |
| 0.1794125611652141 | 0.0490296650698940 | 0.3130598211699943 | T | T | T |
| 0.4149433791800097 | 0.0487726714350546 | 0.3216117147673921 | T | T | T |
| 0.0665701809051829 | 0.8723217091614435 | 0.0857110358719491 | T | T | T |
| 0.0808300183806615 | 0.0028685648743507 | 0.0600969029989932 | T | T | T |
| 0.0987549913389588 | 0.1346332532916346 | 0.0543971679739528 | T | T | T |
| 0.3085901567533976 | 0.8706653246494213 | 0.1073609512482614 | T | T | T |
| 0.3185829267551598 | 0.9983049122555079 | 0.0502445089698187 | T | T | T |
| 0.3017208473431031 | 0.1319132574553735 | 0.0590097975741239 | T | T | T |
| 0.5070788865272365 | 0.9531678662830428 | 0.2898333536685486 | T | T | T |
| 0.5134414424430724 | 0.1325355341597237 | 0.2787803336581219 | T | T | T |
| 0.6382397772941276 | 0.5704397213760931 | 0.2790974983473127 | T | T | T |
| 0.6812305372593542 | 0.5449121569397944 | 0.0972535555020882 | T | T | T |
| 0.7946931120675668 | 0.5452585304462179 | 0.9903732576828365 | T | T | T |
| 0.8988602648635692 | 0.5655340428196159 | 0.1119800993051886 | T | T | T |
| 0.8937430286051083 | 0.5465133096841963 | 0.3082420305485163 | T | T | T |
| 0.7694699071567325 | 0.5494342762205285 | 0.2412200032761955 | T | T | T |
| 0.6422193931349389 | 0.3239195936012899 | 0.2550043912671351 | T | T | T |
| 0.7041500621168012 | 0.3633531548261752 | 0.0932459712493472 | T | T | T |
| 0.8087812379751202 | 0.3481218716389730 | 0.9789424688477887 | T | T | T |
| 0.9049733033749418 | 0.3237273579313056 | 0.1142742200693656 | T | T | T |
| 0.9000361345777695 | 0.3430078932179352 | 0.3101280183810777 | T | T | T |
| 0.7724715264728194 | 0.3507852677898702 | 0.2619396932563763 | T | T | T |
| 0.6824052535586227 | 0.4489787708514918 | 0.2389728483781237 | T | T | T |
| 0.9176673286292939 | 0.4455438782861987 | 0.1833384486517238 | T | T | T |
| 0.5602698014056754 | 0.6235194527705830 | 0.4230091496809991 | T | T | T |
| 0.5938467259181733 | 0.4944180504926370 | 0.4297291341664091 | T | T | T |
| 0.5992653454229265 | 0.3608154652518772 | 0.4346376273983544 | T | T | T |
| 0.8071451605960037 | 0.6347635165926500 | 0.3814660680709011 | T | T | T |
| 0.7956082167826561 | 0.5024462725258613 | 0.4218224952700603 | T | T | T |
| 0.8109314546653973 | 0.3713186436151125 | 0.4517591768506541 | T | T | T |
| 0.0093474282469918 | 0.5420215948262495 | 0.2155248994852260 | T | T | T |
| 0.0152146538153097 | 0.3590686189446287 | 0.2167751640944916 | T | T | T |
| 0.8606010112980099 | 0.4319183422095710 | 0.7883820693945629 | T | T | T |
| 0.8147606820123813 | 0.4539384068946126 | 0.6044363047760675 | T | T | T |
| 0.6999229559402240 | 0.4328230405779706 | 0.5081342979990517 | T | T | T |
| 0.5837975888139573 | 0.4273991073393141 | 0.5996814515142339 | T | T | T |
| 0.6008618543688454 | 0.4293011299348546 | 0.7959163238413828 | T | T | T |
| 0.7302540166169134 | 0.4340031501431588 | 0.7507690880840746 | T | T | T |
| 0.8434740654402925 | 0.6726146328893780 | 0.7647906457022031 | T | T | T |
| 0.7990768390360533 | 0.6237024771815425 | 0.5912437386804095 | T | T | T |
| 0.6835026174872915 | 0.6451393271005696 | 0.4826297515356832 | T | T | T |
| 0.5827478553307471 | 0.6647475234034043 | 0.6100229492658309 | T | T | T |
| 0.5922447884048342 | 0.6520633560991134 | 0.8085618955347297 | T | T | T |
| 0.7162768001798984 | 0.6469486356774582 | 0.7456841441554227 | T | T | T |
| 0.8015803968368000 | 0.5464861318220527 | 0.7522650739652197 | T | T | T |
| 0.5807684937825280 | 0.5435959280130105 | 0.6964015901062115 | T | T | T |
| 0.9326202710167694 | 0.3834443429530474 | 0.9395854491755790 | T | T | T |
| 0.9152083139290046 | 0.5141957778603831 | 0.9271480170803578 | T | T | T |
| 0.8898239175884027 | 0.6406349409439146 | 0.9556385178484641 | T | T | T |
| 0.6871635171188932 | 0.3585833858596214 | 0.9003129087455410 | T | T | T |
| 0.6832088071852802 | 0.4932771264607584 | 0.9146923882678052 | T | T | T |
| 0.6920502045186585 | 0.6250385112011982 | 0.9434935332464346 | T | T | T |

**Structure files (CONTCAR) involved in this work:**

|                    |                    |                    |   |   |   |
|--------------------|--------------------|--------------------|---|---|---|
| 0.4825811122139501 | 0.4539038437782471 | 0.7206699382002538 | T | T | T |
| 0.4778461662722415 | 0.6282936950451613 | 0.7173107659501800 | T | T | T |
| 0.6358075393359561 | 0.9323899515018093 | 0.2748403476645203 | T | T | T |
| 0.6758131049888154 | 0.9639659772043194 | 0.0917166053124382 | T | T | T |
| 0.7953488664108707 | 0.9589885176291305 | 0.0104790140861659 | T | T | T |
| 0.9137590402735785 | 0.9346903003184538 | 0.0888704569522023 | T | T | T |
| 0.8921275677534124 | 0.9303642311826626 | 0.2847780461650031 | T | T | T |
| 0.7648926328251257 | 0.9363965616496814 | 0.2320337924745793 | T | T | T |
| 0.6354724525526727 | 0.1693149600077018 | 0.2328442041911069 | T | T | T |
| 0.7090491285638477 | 0.1269736695700338 | 0.0798706373664487 | T | T | T |
| 0.8135161813712336 | 0.1536536539394190 | 0.9641054447355978 | T | T | T |
| 0.9140780588247001 | 0.1611696866526060 | 0.0902371675901156 | T | T | T |
| 0.8965640465506181 | 0.1622795697495328 | 0.2884602654438795 | T | T | T |
| 0.7679471523432545 | 0.1610264509412579 | 0.2482165893937688 | T | T | T |
| 0.6939569751577541 | 0.0502372008551971 | 0.2406451107168416 | T | T | T |
| 0.9126871604264172 | 0.0472322921234381 | 0.1933265843006277 | T | T | T |
| 0.5647553788544882 | 0.8721525237392362 | 0.4194591205183039 | T | T | T |
| 0.5866479289263644 | 0.0028986311300074 | 0.4279373707486498 | T | T | T |
| 0.6090185336955741 | 0.1342031076079006 | 0.4207012349827083 | T | T | T |
| 0.8040869099187861 | 0.8588677095750795 | 0.3841054889370520 | T | T | T |
| 0.8054918663818945 | 0.9931432653437310 | 0.4008157894576826 | T | T | T |
| 0.8095817483912795 | 0.1239445860898661 | 0.4308481127997743 | T | T | T |
| 0.0119236932293632 | 0.9570889254042514 | 0.2153449388801714 | T | T | T |
| 0.0146006561340075 | 0.1323631021395981 | 0.2107970621431142 | T | T | T |
| 0.8619738371975126 | 0.0707469791521961 | 0.7625353095308920 | T | T | T |
| 0.8170002675448473 | 0.0407217496518522 | 0.5842230770861430 | T | T | T |
| 0.7028297993911146 | 0.0526220725230353 | 0.4884152003066982 | T | T | T |
| 0.5920038089877880 | 0.0738867699560638 | 0.5929356036799454 | T | T | T |
| 0.6043475856847271 | 0.0675464332618712 | 0.7882287113150298 | T | T | T |
| 0.7318819128307664 | 0.0605441603315118 | 0.7335881283713119 | T | T | T |
| 0.8651033251000890 | 0.8299135535814592 | 0.7372294945822336 | T | T | T |
| 0.7974073186586319 | 0.8727674738736066 | 0.5787031044549215 | T | T | T |
| 0.6877984157995802 | 0.8489386657176969 | 0.4747137493586342 | T | T | T |
| 0.5902838353541768 | 0.8329108233991828 | 0.6081036850424538 | T | T | T |
| 0.5970193217425436 | 0.8508309460822140 | 0.8062399508945214 | T | T | T |
| 0.7338575252214924 | 0.8396490920060466 | 0.7491015374075908 | T | T | T |
| 0.8084527578966046 | 0.9508977322178415 | 0.7353508711792458 | T | T | T |
| 0.5831893230393442 | 0.9550179896139910 | 0.6826637942062302 | T | T | T |
| 0.9367822025350826 | 0.1363713051764901 | 0.8949944395635846 | T | T | T |
| 0.9056188951868533 | 0.0129947439154623 | 0.9307528628899724 | T | T | T |
| 0.8799299879526168 | 0.8825926319480532 | 0.9159796309246117 | T | T | T |
| 0.6936888403277189 | 0.1392668823090368 | 0.8857847030962120 | T | T | T |
| 0.6908803572528850 | 0.0056329134412969 | 0.9031682140943523 | T | T | T |
| 0.7051773955831816 | 0.8754734753721723 | 0.9503412764733989 | T | T | T |
| 0.4870087519976671 | 0.0457474816987139 | 0.7092250249693074 | T | T | T |
| 0.4826114554017482 | 0.8682474408632893 | 0.7106791586869892 | T | T | T |
| 0.3522400960210739 | 0.4369383667974678 | 0.7149726123731664 | T | T | T |
| 0.2961137265076145 | 0.4298471011870086 | 0.8925171897668696 | T | T | T |
| 0.2003183295855223 | 0.4451478242405875 | 0.0306932153138722 | T | T | T |
| 0.1052326545839256 | 0.4311842366731152 | 0.8921989365835736 | T | T | T |
| 0.1011574091283123 | 0.4450285353123440 | 0.6948698959138095 | T | T | T |
| 0.2259381048309032 | 0.4717389444884140 | 0.7366145252691361 | T | T | T |
| 0.3545079121146427 | 0.6704413285648481 | 0.7404826249297819 | T | T | T |

**Structure files (CONTCAR) involved in this work:**

|                    |                    |                    |   |   |   |
|--------------------|--------------------|--------------------|---|---|---|
| 0.2991730949526243 | 0.6604654897331033 | 0.9158097077378724 | T | T | T |
| 0.1900883408261801 | 0.6452277374276355 | 0.0263695118654447 | T | T | T |
| 0.0919128224787205 | 0.6698498413612747 | 0.8986409274388372 | T | T | T |
| 0.1025717134888387 | 0.6579309374586902 | 0.7014353708919057 | T | T | T |
| 0.2271375184515221 | 0.6371721734938830 | 0.7527720106227965 | T | T | T |
| 0.3203711941847989 | 0.5499075680647461 | 0.8103138345586778 | T | T | T |
| 0.0803307386929342 | 0.5506202615807353 | 0.8155878428823918 | T | T | T |
| 0.4291554531860099 | 0.3730861982737404 | 0.5854704927406750 | T | T | T |
| 0.4150320228237864 | 0.5049032082650753 | 0.5681402301125008 | T | T | T |
| 0.3967808764845567 | 0.6372938850945885 | 0.5587994046446556 | T | T | T |
| 0.1958470763307910 | 0.3714472851058194 | 0.6109899708392968 | T | T | T |
| 0.1784483588155498 | 0.4982176382684935 | 0.5547931432563820 | T | T | T |
| 0.1927608953224122 | 0.6321952757277889 | 0.5598081968657819 | T | T | T |
| 0.9904090201212433 | 0.4524729630477320 | 0.7945678648050678 | T | T | T |
| 0.9853873476529066 | 0.6441024131592332 | 0.7874805012252318 | T | T | T |
| 0.140008517857035  | 0.5595066415001101 | 0.2137781981874851 | T | T | T |
| 0.1971979046766060 | 0.5671148778706284 | 0.3895137821850231 | T | T | T |
| 0.2965323232188428 | 0.5526348858733277 | 0.5217922033482657 | T | T | T |
| 0.3978247118334884 | 0.5669323462490934 | 0.3935958438253760 | T | T | T |
| 0.3973520908950546 | 0.5522160723962083 | 0.1964149070622204 | T | T | T |
| 0.2693947693594032 | 0.5313423012262618 | 0.2338935989276499 | T | T | T |
| 0.1420861461101941 | 0.3264535439994580 | 0.2389035120449945 | T | T | T |
| 0.1932409685661498 | 0.3400087225552398 | 0.4176151517950297 | T | T | T |
| 0.3088935841934680 | 0.3509302261241669 | 0.5110341661938188 | T | T | T |
| 0.4159856428873311 | 0.3277317937745998 | 0.3988428033615997 | T | T | T |
| 0.3958979133087311 | 0.3387843609097260 | 0.2028461364108577 | T | T | T |
| 0.2706113359247471 | 0.3555931383488041 | 0.2574078473503356 | T | T | T |
| 0.1782172133505094 | 0.4472370318410847 | 0.3030311772832511 | T | T | T |
| 0.4160494551220818 | 0.4471588609370665 | 0.3158047952929827 | T | T | T |
| 0.0647118854865660 | 0.6242180522323787 | 0.0827394964788519 | T | T | T |
| 0.0793801382318986 | 0.4931262489446603 | 0.0640163416248844 | T | T | T |
| 0.0980339769492320 | 0.3615926828121113 | 0.0585946623622255 | T | T | T |
| 0.3089917820433159 | 0.6278662935958543 | 0.1077975847483698 | T | T | T |
| 0.3197441527366738 | 0.4989928437750514 | 0.0566186859350334 | T | T | T |
| 0.3042493486411182 | 0.3653649960122188 | 0.0638501043805735 | T | T | T |
| 0.5105047591799574 | 0.5399229681013785 | 0.2911587976892566 | T | T | T |
| 0.5156823373362934 | 0.3616088059759297 | 0.2781981511226281 | T | T | T |
| 0.4408993710668644 | 0.7479873389044019 | 0.6455004092948000 | T | T | T |
| 0.1950956317077470 | 0.7483504645244502 | 0.6508576707166025 | T | T | T |
| 0.2727438932284381 | 0.7490529260795941 | 0.0572689023617151 | T | T | T |
| 0.1071322039238938 | 0.7479748724064940 | 0.0568905154279008 | T | T | T |
| 0.0607980385870959 | 0.2471389139286678 | 0.1359458328157415 | T | T | T |
| 0.3050678984674325 | 0.2476066379167977 | 0.1508587671057267 | T | T | T |
| 0.2262485131331150 | 0.2496846793545922 | 0.5556967775070144 | T | T | T |
| 0.3909495872517058 | 0.2482362324469589 | 0.5509636749341875 | T | T | T |
| 0.5601349764454718 | 0.2464359577384017 | 0.3529556279030276 | T | T | T |
| 0.8160086173873893 | 0.2499420389222720 | 0.3772264962686629 | T | T | T |
| 0.7202335623817344 | 0.2474366975358395 | 0.9960088936529833 | T | T | T |
| 0.9009622316398921 | 0.2548069068892883 | 0.9487605910684538 | T | T | T |
| 0.9159695866997524 | 0.7581989808065004 | 0.8929936567123512 | T | T | T |
| 0.6790854620215020 | 0.7421424825349566 | 0.8859282536680299 | T | T | T |
| 0.5982732874583351 | 0.7478424293305667 | 0.4582239799383291 | T | T | T |
| 0.7939348794496459 | 0.6777955767668415 | 0.0900215096724315 | T | T | T |

**Structure files (CONTCAR) involved in this work:**

|                    |                    |                    |   |   |   |
|--------------------|--------------------|--------------------|---|---|---|
| 0.7106322150102710 | 0.7795228277721139 | 0.1005017302745590 | T | T | T |
| 0.8434059508963704 | 0.7994173086868308 | 0.0842374114235450 | T | T | T |
| 0.7796747898527686 | 0.7517335738402415 | 0.4973223988486112 | T | T | T |
| 0.9135518466875222 | 0.6754971602366707 | 0.8360622500030916 | T | T | T |
| 0.6760744949023424 | 0.8281668505286101 | 0.8420936275471841 | T | T | T |
| 0.7680014822560300 | 0.6660528544464326 | 0.4875642180093188 | T | T | T |
| 0.7131190093721788 | 0.7056516776700376 | 0.0239735793668534 | T | T | T |
| 0.7690090930054346 | 0.8331418699181267 | 0.0388225031749129 | T | T | T |
| 0.8648261048130069 | 0.7232066156060556 | 0.0179555669662146 | T | T | T |
| 0.9676873313520620 | 0.7633202174872153 | 0.2295044206686385 | T | T | T |
| 0.9138341953741654 | 0.7267215229839891 | 0.2880453063074099 | T | T | T |
| 0.9574586798276847 | 0.7633284864865324 | 0.1482429110561944 | T | T | T |
| 0.9713962522733334 | 0.8162743772300372 | 0.2519292282929175 | T | T | T |
| 0.0170448355353006 | 0.7399154934382738 | 0.2389752878771084 | T | T | T |
| 0.8645302736883138 | 0.7503751903045224 | 0.2789384025177374 | T | T | T |
| 0.9241161096431728 | 0.7268236432906122 | 0.3688013907383625 | T | T | T |
| 0.9098492647916233 | 0.6737728021249427 | 0.2658848581974304 | T | T | T |
| 0.7938083605778323 | 0.6978589286995321 | 0.1575151611061399 | T | T | T |

**Figure 4(b) Route(a)-Cu ③**

Si O Al Cu C H

1.0000000000000000

20.0219993591000005 0.0000000000000000 0.0000000000000000

0.0000000000000000 19.8990001678000006 0.0000000000000000

0.0000000000000000 0.0000000000000000 13.3830003737999998

93 195 3 3 2 7

Selective dynamics

Direct

|                    |                    |                    |   |   |   |
|--------------------|--------------------|--------------------|---|---|---|
| 0.4200713588993181 | 0.0537725875374975 | 0.6404400239168185 | T | T | T |
| 0.2999882082792739 | 0.0265221059664171 | 0.7851589916154417 | T | T | T |
| 0.2790487796911720 | 0.0646516821858637 | 0.0050047472558419 | T | T | T |
| 0.1193914209546678 | 0.0648114918109091 | 0.0038091841399310 | T | T | T |
| 0.0666314935549508 | 0.0270712197098328 | 0.7925235788922972 | T | T | T |
| 0.1769109956936092 | 0.0519993304192624 | 0.6436012476355435 | T | T | T |
| 0.4208503026994875 | 0.8271308989971713 | 0.6633588765479688 | T | T | T |
| 0.3008049572090393 | 0.8693326685506547 | 0.8023552699358050 | T | T | T |
| 0.2694922812188389 | 0.8275471029316899 | 0.0255328132621111 | T | T | T |
| 0.1153513005798932 | 0.8261266649470488 | 0.0183761542340544 | T | T | T |
| 0.0644470429030578 | 0.8666759063427324 | 0.8039710647391791 | T | T | T |
| 0.1783762217699373 | 0.8283402906032328 | 0.6660406190885113 | T | T | T |
| 0.0740258171376920 | 0.9447242454219978 | 0.1425261686477884 | T | T | T |
| 0.1966950868157832 | 0.9718891537252540 | 0.2855127237149366 | T | T | T |
| 0.2168381043832301 | 0.9333850665075618 | 0.5054295674184014 | T | T | T |
| 0.3763986309999632 | 0.9291312039468302 | 0.5081936812071999 | T | T | T |
| 0.4289163280103137 | 0.9710636549841186 | 0.3003857938264083 | T | T | T |
| 0.3226430406305829 | 0.9476094067028754 | 0.1443136036524429 | T | T | T |
| 0.0787660121064964 | 0.1706397598808410 | 0.1601087699960229 | T | T | T |
| 0.1968903406833579 | 0.1294718491315463 | 0.3038227505566921 | T | T | T |
| 0.2289397855026365 | 0.1724006950852278 | 0.5213607809287670 | T | T | T |
| 0.3837724470711961 | 0.1729170780692988 | 0.5078856707129229 | T | T | T |
| 0.4342024986469886 | 0.1278342607476420 | 0.2993879111454581 | T | T | T |
| 0.3186367784466532 | 0.1688983923117248 | 0.1675349342135481 | T | T | T |
| 0.5745243401698904 | 0.5579165864665441 | 0.3581206511854053 | T | T | T |

**Structure files (CONTCAR) involved in this work:**

|                    |                    |                    |   |   |   |
|--------------------|--------------------|--------------------|---|---|---|
| 0.6934032012812531 | 0.5280758201539073 | 0.2200987095967856 | T | T | T |
| 0.7102227686333502 | 0.5456782810011647 | 0.9904420390361575 | T | T | T |
| 0.8681707159646801 | 0.5594398574073173 | 0.9892827455005085 | T | T | T |
| 0.9293116623173919 | 0.5274060141947763 | 0.1960145102345370 | T | T | T |
| 0.8187163510736759 | 0.5638869058737568 | 0.3405144230328657 | T | T | T |
| 0.5796025213460881 | 0.3267224579165901 | 0.3290571524707980 | T | T | T |
| 0.7012538137850690 | 0.3712330802221104 | 0.2106899909658651 | T | T | T |
| 0.7334767934434882 | 0.3299818564463909 | 0.9910851427321525 | T | T | T |
| 0.8885423757383781 | 0.3269682919591164 | 0.9929287640655056 | T | T | T |
| 0.9350143587987787 | 0.3705983718831105 | 0.2030253715878352 | T | T | T |
| 0.8241298061660302 | 0.3303304006747924 | 0.3479884565984021 | T | T | T |
| 0.9251080288684310 | 0.4410096179386221 | 0.8564768381361306 | T | T | T |
| 0.8056172847954509 | 0.4669056704654413 | 0.7198421803632996 | T | T | T |
| 0.7812084412178409 | 0.4442598866391435 | 0.4933963368287670 | T | T | T |
| 0.6213328784918752 | 0.4318344652232692 | 0.4904258657874278 | T | T | T |
| 0.5641349237173006 | 0.4617745329955361 | 0.7004536291906930 | T | T | T |
| 0.6766266062360387 | 0.4285138310066985 | 0.8389140862579917 | T | T | T |
| 0.7948850490960254 | 0.6208160989303073 | 0.7027390225287310 | T | T | T |
| 0.6078559437541452 | 0.6740112310966515 | 0.4878555412720501 | T | T | T |
| 0.5667311896375552 | 0.6202387423038045 | 0.7026671572215651 | T | T | T |
| 0.6738578632391355 | 0.6673510552431999 | 0.8459035115172947 | T | T | T |
| 0.5746878703986029 | 0.9434866527949020 | 0.3569622040416147 | T | T | T |
| 0.6953729617854322 | 0.9742458762490187 | 0.2200053798790611 | T | T | T |
| 0.7119728302898991 | 0.9524710695908565 | 0.9900631780337280 | T | T | T |
| 0.8720509976623684 | 0.9455632238856435 | 0.9848516565995338 | T | T | T |
| 0.9285736294276851 | 0.9717941781900495 | 0.2000162186408667 | T | T | T |
| 0.8174421973600570 | 0.9327020544523272 | 0.3411996958550530 | T | T | T |
| 0.5792165210071751 | 0.1734301405242928 | 0.3281300462163417 | T | T | T |
| 0.7027633888234195 | 0.1304547694021146 | 0.2086703903683866 | T | T | T |
| 0.7345630649305732 | 0.1683571889622427 | 0.9886359311878612 | T | T | T |
| 0.8899962780207687 | 0.1749494062500770 | 0.9860488047487199 | T | T | T |
| 0.9350722827693408 | 0.1291968507669412 | 0.2025341708215715 | T | T | T |
| 0.8242976286626003 | 0.1754762061546614 | 0.3427484854024090 | T | T | T |
| 0.9236645753204034 | 0.0643528931786977 | 0.8467780354849305 | T | T | T |
| 0.8040286052935998 | 0.0343983630156846 | 0.7125367386157272 | T | T | T |
| 0.7819442065330847 | 0.0571335873678890 | 0.4853609863786559 | T | T | T |
| 0.6216951780880384 | 0.0689890577471521 | 0.4878676137558876 | T | T | T |
| 0.5646390427934942 | 0.0366888906026696 | 0.6989146833965592 | T | T | T |
| 0.6768639685473317 | 0.0690572294711105 | 0.8363723807830870 | T | T | T |
| 0.9122665118165475 | 0.8273596128231164 | 0.8375252724998345 | T | T | T |
| 0.7973387367067591 | 0.8776040097092824 | 0.7075173557013781 | T | T | T |
| 0.7679420662703001 | 0.8285357368327911 | 0.4921450366325329 | T | T | T |
| 0.6092682587533562 | 0.8260942313307760 | 0.4945817059279960 | T | T | T |
| 0.5631657432323250 | 0.8782297539910540 | 0.7079292354494731 | T | T | T |
| 0.4202653433186004 | 0.4437230106680808 | 0.6450813829293532 | T | T | T |
| 0.3000698148358354 | 0.4729006959322598 | 0.7882481172433148 | T | T | T |
| 0.2809152713047778 | 0.4337417989537021 | 0.0084915368246348 | T | T | T |
| 0.1220539438025523 | 0.4319929654132039 | 0.0080466930969678 | T | T | T |
| 0.0710717648798134 | 0.4708964001907166 | 0.7992160147184346 | T | T | T |
| 0.1773094034611932 | 0.4482851759278434 | 0.6467348148502498 | T | T | T |
| 0.4230018048161682 | 0.6714703628464822 | 0.6653195371167003 | T | T | T |
| 0.3037940531733419 | 0.6295282867707099 | 0.8044315256899596 | T | T | T |
| 0.2695696615862318 | 0.6715464278580171 | 0.0257931592956260 | T | T | T |

**Structure files (CONTCAR) involved in this work:**

|                    |                    |                    |   |   |   |
|--------------------|--------------------|--------------------|---|---|---|
| 0.1154940925591604 | 0.6728287179586575 | 0.0133901976729708 | T | T | T |
| 0.0678310564614181 | 0.6289371987829006 | 0.8013430301330642 | T | T | T |
| 0.1820493176252702 | 0.6696705151924593 | 0.6639281389635402 | T | T | T |
| 0.0747314377983242 | 0.5546954560110937 | 0.1396400621107361 | T | T | T |
| 0.1960006487834634 | 0.5267303362372124 | 0.2828508271726167 | T | T | T |
| 0.2182150854071111 | 0.5645595530171545 | 0.5045317063920916 | T | T | T |
| 0.3778009288494676 | 0.5671271320479825 | 0.5098120100939711 | T | T | T |
| 0.4301785715973558 | 0.5272883485697102 | 0.3008019636597724 | T | T | T |
| 0.3233639528580718 | 0.5516845783787420 | 0.1456871836496597 | T | T | T |
| 0.0788982063574580 | 0.3256149841224922 | 0.1630060798546326 | T | T | T |
| 0.1963193785812669 | 0.3689807606838353 | 0.3033879705768729 | T | T | T |
| 0.2307184025954645 | 0.3287901542222443 | 0.5228101941604557 | T | T | T |
| 0.3857971972340776 | 0.3253170580323487 | 0.5115199440655384 | T | T | T |
| 0.4352547639683914 | 0.3706936934392836 | 0.3010766580861797 | T | T | T |
| 0.3193528258368113 | 0.3282311457590597 | 0.1689635604218727 | T | T | T |
| 0.3540585695470624 | 0.0594281870470178 | 0.7099614416194511 | T | T | T |
| 0.2982982325950987 | 0.0705594348738435 | 0.8875539889679316 | T | T | T |
| 0.1989693315796159 | 0.0533343909980019 | 0.0191022522169927 | T | T | T |
| 0.1001606715209191 | 0.0667848717061788 | 0.8862889456852483 | T | T | T |
| 0.1016855600410779 | 0.0490140612634889 | 0.6885363115587625 | T | T | T |
| 0.2269965921945880 | 0.0286850233466799 | 0.7326188877956624 | T | T | T |
| 0.3576072037882995 | 0.8301133796641965 | 0.7395344793165878 | T | T | T |
| 0.2979599006975635 | 0.8369469113367658 | 0.9132142462941983 | T | T | T |
| 0.1917583520372844 | 0.8522335642907867 | 0.0316438128863423 | T | T | T |
| 0.0957822500251442 | 0.8304005122106546 | 0.9014417567910348 | T | T | T |
| 0.1015081994637199 | 0.8381386230242998 | 0.7045828639973359 | T | T | T |
| 0.2281052162089243 | 0.8609383137535531 | 0.7493079820223965 | T | T | T |
| 0.3188937233831940 | 0.9488703164335952 | 0.8101058125073426 | T | T | T |
| 0.0745147152049891 | 0.9471191928330830 | 0.8131225185631895 | T | T | T |
| 0.4282334744218317 | 0.1221506534469567 | 0.5750784692134584 | T | T | T |
| 0.4157041892014145 | 0.9899523176810557 | 0.5644919485706584 | T | T | T |
| 0.3985845120238338 | 0.8573471917839954 | 0.5550348826293878 | T | T | T |
| 0.1922802471103578 | 0.1281231514448391 | 0.6070215576618876 | T | T | T |
| 0.1817966538429762 | 0.0010200843876847 | 0.5490964977846188 | T | T | T |
| 0.1878211439436110 | 0.8664851328491723 | 0.5596218948713791 | T | T | T |
| 0.9884042363364579 | 0.0467350973634993 | 0.7798579924434664 | T | T | T |
| 0.9854048244905461 | 0.8492159921683794 | 0.7987041808968522 | T | T | T |
| 0.1383350076966947 | 0.9415286902168576 | 0.2149553281843213 | T | T | T |
| 0.1995610711379770 | 0.9276373018651354 | 0.3872487937329228 | T | T | T |
| 0.2966814976239783 | 0.9399489913468824 | 0.5242042227304692 | T | T | T |
| 0.3944053775901155 | 0.9282235619438440 | 0.3900249951475401 | T | T | T |
| 0.3964381486625588 | 0.9512493856038967 | 0.1934172711319168 | T | T | T |
| 0.2679688921234791 | 0.9673411353223444 | 0.2289827903192591 | T | T | T |
| 0.1426599396768815 | 0.1666782664281768 | 0.2335258499339896 | T | T | T |
| 0.1920968079790625 | 0.1626699824433845 | 0.4140713646860807 | T | T | T |
| 0.3062477412009230 | 0.1479198174439811 | 0.5106445284983815 | T | T | T |
| 0.4103300956761811 | 0.1735577678877096 | 0.3932786850635746 | T | T | T |
| 0.3958675255988748 | 0.1530588442982317 | 0.1985252302766349 | T | T | T |
| 0.2711153680424931 | 0.1397624473294675 | 0.2567109315507919 | T | T | T |
| 0.1800395192261677 | 0.0498301887591890 | 0.3111227368229872 | T | T | T |
| 0.4159262190865810 | 0.0501533893658321 | 0.3238708915328184 | T | T | T |
| 0.0656214879464636 | 0.8726166719133381 | 0.0856393198451634 | T | T | T |
| 0.0798938207510384 | 0.0033619277410844 | 0.0584634232599090 | T | T | T |

**Structure files (CONTCAR) involved in this work:**

|                    |                    |                    |   |   |   |
|--------------------|--------------------|--------------------|---|---|---|
| 0.0960821295322574 | 0.1354273674340014 | 0.0535323790799971 | T | T | T |
| 0.3122247101695714 | 0.8715498315445365 | 0.1043433464716159 | T | T | T |
| 0.3177188154794434 | 1.0000105666892596 | 0.0514995205534068 | T | T | T |
| 0.3012783643363829 | 0.1333076573425373 | 0.0613559981542402 | T | T | T |
| 0.5079169791454260 | 0.9548609260703109 | 0.2906401766771322 | T | T | T |
| 0.5143655260932068 | 0.1346516270698346 | 0.2827258573889492 | T | T | T |
| 0.6372169527724562 | 0.5688272719107385 | 0.2821648306711961 | T | T | T |
| 0.6790504771726784 | 0.5410922801681619 | 0.1013738595889639 | T | T | T |
| 0.7904061693430844 | 0.5363502168972973 | 0.9913861710089916 | T | T | T |
| 0.8980827116323530 | 0.5685730179725551 | 0.1010395235112168 | T | T | T |
| 0.8944272052493898 | 0.5516527867087754 | 0.2981010044598011 | T | T | T |
| 0.7681008888136426 | 0.5546324428320777 | 0.2437931504132874 | T | T | T |
| 0.6392998168109889 | 0.3250885606113403 | 0.2469320791248016 | T | T | T |
| 0.7049750846531251 | 0.3669802934820026 | 0.0901517033288971 | T | T | T |
| 0.8115036214539034 | 0.3513104728110856 | 0.9792389096209387 | T | T | T |
| 0.9085890178201229 | 0.3248177415599411 | 0.1104195740147722 | T | T | T |
| 0.8988622489915767 | 0.3470471897669675 | 0.3059071055322661 | T | T | T |
| 0.7712343595186648 | 0.3451919821245871 | 0.2578482340838187 | T | T | T |
| 0.6869886858557567 | 0.4482666359208443 | 0.2451494560024106 | T | T | T |
| 0.9163840638966313 | 0.4479445267261982 | 0.1761185692497048 | T | T | T |
| 0.5581147526070891 | 0.6245494324714779 | 0.4234704465815877 | T | T | T |
| 0.5894234734816305 | 0.4955347132242982 | 0.4327777811228929 | T | T | T |
| 0.6059305829084584 | 0.3627597890981524 | 0.4300851095545141 | T | T | T |
| 0.8137318307781972 | 0.6374885549644294 | 0.3854649562240697 | T | T | T |
| 0.8018287711854035 | 0.5044547992543298 | 0.4195454761916712 | T | T | T |
| 0.8079339267496531 | 0.3736323404997179 | 0.4468291221035081 | T | T | T |
| 0.0083941729710606 | 0.5434323023533540 | 0.2067829091181290 | T | T | T |
| 0.0153739145062979 | 0.3624394953537477 | 0.2159284810061753 | T | T | T |
| 0.8625100721205339 | 0.4261137450364128 | 0.7827629549296148 | T | T | T |
| 0.8161011069524495 | 0.4527135057733694 | 0.6019570419350073 | T | T | T |
| 0.7007503340533058 | 0.4414589421084000 | 0.5053668909041471 | T | T | T |
| 0.5854043148406809 | 0.4242402366364910 | 0.5980266096820794 | T | T | T |
| 0.6021212812055375 | 0.4247378134028163 | 0.7926446410138857 | T | T | T |
| 0.7317017010144157 | 0.4399469040594390 | 0.7518276036180080 | T | T | T |
| 0.8550619474873052 | 0.6712744824550168 | 0.7287152827949731 | T | T | T |
| 0.7784374708343360 | 0.6157964693465288 | 0.5870249831859726 | T | T | T |
| 0.6827596299150476 | 0.6611579911546087 | 0.4542809110888710 | T | T | T |
| 0.5966774999936411 | 0.6600522230235719 | 0.6077890523761481 | T | T | T |
| 0.5993076907836644 | 0.6495397005289195 | 0.8065355731316720 | T | T | T |
| 0.7280881548047127 | 0.6442883257981611 | 0.7659077964519667 | T | T | T |
| 0.8134400028930604 | 0.5457255127427673 | 0.7483379726127545 | T | T | T |
| 0.5849222286382374 | 0.5406908304629453 | 0.6955161793751782 | T | T | T |
| 0.9368911151793061 | 0.3769507267208132 | 0.9302905792038445 | T | T | T |
| 0.9122461697336349 | 0.5062893297087969 | 0.9273176870409054 | T | T | T |
| 0.8762198840568030 | 0.6325773809037893 | 0.9330792651371009 | T | T | T |
| 0.6913819657407771 | 0.3582642864184840 | 0.8966121672221083 | T | T | T |
| 0.6768490984328147 | 0.4922891597423684 | 0.9161641805983253 | T | T | T |
| 0.6882590115004397 | 0.6235556859258703 | 0.9540193002223146 | T | T | T |
| 0.4842356962631502 | 0.4538733144587732 | 0.7181237669286129 | T | T | T |
| 0.4862424421188054 | 0.6300144441019240 | 0.7101943471255202 | T | T | T |
| 0.6371406802161576 | 0.9349153274358379 | 0.2797919317516279 | T | T | T |
| 0.6821396925023717 | 0.9656680774530066 | 0.1008923411757400 | T | T | T |
| 0.7926760824063478 | 0.9594338153508634 | 0.9890558062667199 | T | T | T |



**Structure files (CONTCAR) involved in this work:**

|                    |                    |                    |   |   |   |
|--------------------|--------------------|--------------------|---|---|---|
| 0.9009003201624671 | 0.9368782259163329 | 0.0974794616319698 | T | T | T |
| 0.8932303198131314 | 0.9364235652543945 | 0.2957409484813324 | T | T | T |
| 0.7671890834730007 | 0.9402356394433298 | 0.2450998926668473 | T | T | T |
| 0.6376377073161548 | 0.1724392026801939 | 0.2435776423720116 | T | T | T |
| 0.7066963947170299 | 0.1305265250762773 | 0.0878619807621362 | T | T | T |
| 0.8130889567497395 | 0.1491404171423919 | 0.9747068296021243 | T | T | T |
| 0.9124334276342180 | 0.1682033704032006 | 0.1018425452557846 | T | T | T |
| 0.8994721824636226 | 0.1623867340972037 | 0.2996511382305028 | T | T | T |
| 0.7710483935612605 | 0.1632338741314600 | 0.2522105783010483 | T | T | T |
| 0.6955240200235675 | 0.0534935209996322 | 0.2494692002272647 | T | T | T |
| 0.9113690570261337 | 0.0510959808266561 | 0.1947640242178374 | T | T | T |
| 0.5656564543353011 | 0.8770419113328677 | 0.4247023262794213 | T | T | T |
| 0.5860379048148734 | 0.0078812440790040 | 0.4287316952493827 | T | T | T |
| 0.6066021604184220 | 0.1389571219918940 | 0.4300112203727302 | T | T | T |
| 0.8070266322647469 | 0.8608951228953760 | 0.3945913246681036 | T | T | T |
| 0.8062352333186590 | 0.9948628658764319 | 0.4168287098669352 | T | T | T |
| 0.8082192088029994 | 0.1269552759839005 | 0.4366347674960772 | T | T | T |
| 0.0079289265422342 | 0.9575655362473473 | 0.2102066975802486 | T | T | T |
| 0.0157843786521274 | 0.1331845249134036 | 0.2142018350179283 | T | T | T |
| 0.8596001301534318 | 0.0766110103338527 | 0.7754680819093078 | T | T | T |
| 0.8150396674589018 | 0.0500652923382852 | 0.5951845385939070 | T | T | T |
| 0.7014205882349002 | 0.0564095179780029 | 0.4945519264030058 | T | T | T |
| 0.5900114229680938 | 0.0746897186263773 | 0.5984093206118462 | T | T | T |
| 0.6014191971068513 | 0.0726846294095171 | 0.7934925516195239 | T | T | T |
| 0.7295248334505327 | 0.0587120103007718 | 0.7451141978058318 | T | T | T |
| 0.8621338970647283 | 0.8334879454654626 | 0.7443122443823208 | T | T | T |
| 0.7906218611151286 | 0.8751848967100739 | 0.5871785054047549 | T | T | T |
| 0.6878894746012765 | 0.8400565287314665 | 0.4725545638258700 | T | T | T |
| 0.5936015017175617 | 0.8385751070332838 | 0.6118626134970664 | T | T | T |
| 0.5928519514181414 | 0.8482816092200914 | 0.8099041262850926 | T | T | T |
| 0.7320666573088871 | 0.8520572465686195 | 0.7639153821851120 | T | T | T |
| 0.8147041295387861 | 0.9555600612739447 | 0.7390096650952351 | T | T | T |
| 0.5829849951355467 | 0.9575740925033381 | 0.6940961865889116 | T | T | T |
| 0.9380186744875123 | 0.1306807555128578 | 0.9138348810800528 | T | T | T |
| 0.9113075278951225 | 0.0030726018651941 | 0.9255261330906203 | T | T | T |
| 0.8873219398246542 | 0.8722474437849538 | 0.9342001591412410 | T | T | T |
| 0.6928898644589871 | 0.1390021146804925 | 0.8943959768000288 | T | T | T |
| 0.6805782400755561 | 0.0044819430995838 | 0.9115554770792310 | T | T | T |
| 0.6893110874717641 | 0.8741963862895511 | 0.9641890400745340 | T | T | T |
| 0.4846695695968253 | 0.0467729270809420 | 0.7126097650008488 | T | T | T |
| 0.4816683499435812 | 0.8712239981256482 | 0.7089105905940244 | T | T | T |
| 0.3536370721966703 | 0.4388689755465854 | 0.7132300406951042 | T | T | T |
| 0.2971520895419780 | 0.4284046054238916 | 0.8900320851918609 | T | T | T |
| 0.2012352823686936 | 0.4440151735427159 | 0.0275320648817131 | T | T | T |
| 0.1055640166762589 | 0.4283057532333199 | 0.8897128926353626 | T | T | T |
| 0.1023220387532219 | 0.4476307029512140 | 0.6927043736239985 | T | T | T |
| 0.2274014032223946 | 0.4731994594200987 | 0.7349092477272426 | T | T | T |
| 0.3627305066978527 | 0.6683112084015248 | 0.7458628569707138 | T | T | T |
| 0.2995004471919721 | 0.6625924677315266 | 0.9144908102060246 | T | T | T |
| 0.1919209515483671 | 0.6470795624192333 | 0.0287635060706215 | T | T | T |
| 0.0972395692508802 | 0.6718951024533651 | 0.8958941617514244 | T | T | T |
| 0.1061668843763183 | 0.6552328836354365 | 0.7008941212039109 | T | T | T |
| 0.2331416453880775 | 0.6389386027801861 | 0.7467212560357913 | T | T | T |

**Structure files (CONTCAR) involved in this work:**

|                    |                    |                    |   |   |   |
|--------------------|--------------------|--------------------|---|---|---|
| 0.3212087214931458 | 0.5499099107429850 | 0.8136800836827215 | T | T | T |
| 0.0852137325148344 | 0.5498889632147217 | 0.8204566167379849 | T | T | T |
| 0.4293671686704043 | 0.3737310071942826 | 0.5838033845593217 | T | T | T |
| 0.4165454883368001 | 0.5058725356092357 | 0.5659853871176969 | T | T | T |
| 0.3985861879778576 | 0.6384404516787557 | 0.5600834038365146 | T | T | T |
| 0.1957148061951282 | 0.3729175595859237 | 0.6098502820291166 | T | T | T |
| 0.1800947527347737 | 0.5000997255257669 | 0.5529480825199782 | T | T | T |
| 0.1943584285505436 | 0.6344645716840073 | 0.5558987742111736 | T | T | T |
| 0.9917998965796820 | 0.4546332960040066 | 0.7918113926300662 | T | T | T |
| 0.9893663631303554 | 0.6401904411459418 | 0.7908974477716126 | T | T | T |
| 0.1390036597497857 | 0.5601085096400894 | 0.2126083499269777 | T | T | T |
| 0.1989965747889170 | 0.5682757622005264 | 0.3869744139378996 | T | T | T |
| 0.2980070805205624 | 0.5545076352061387 | 0.5212403869120058 | T | T | T |
| 0.3980836894867905 | 0.5699174483560817 | 0.3926858082751151 | T | T | T |
| 0.3969927828682807 | 0.5499359477733725 | 0.1955444955775876 | T | T | T |
| 0.2684239357289812 | 0.5311488488597899 | 0.2294475740580852 | T | T | T |
| 0.1417696620936743 | 0.3274488597765375 | 0.2389105731451346 | T | T | T |
| 0.1934094917469225 | 0.3408091759419570 | 0.4166904950572789 | T | T | T |
| 0.3085626743237620 | 0.3511419087720001 | 0.5113960491388350 | T | T | T |
| 0.4148216761282879 | 0.3267857180803597 | 0.3985096286062206 | T | T | T |
| 0.3962570866511495 | 0.3417745369856119 | 0.2032224589084641 | T | T | T |
| 0.2703919155510345 | 0.3575795669277800 | 0.2561243228839751 | T | T | T |
| 0.1775522784007020 | 0.4483322272862924 | 0.3026476992659823 | T | T | T |
| 0.4146131385095341 | 0.4482525204976860 | 0.3215847185919782 | T | T | T |
| 0.0659080730881357 | 0.6249212982902288 | 0.0781120654625961 | T | T | T |
| 0.0814214659275998 | 0.4936572911240293 | 0.0596119254495791 | T | T | T |
| 0.0983296301466620 | 0.3616034437405984 | 0.0580491285006625 | T | T | T |
| 0.3114718365038509 | 0.6274808509695591 | 0.1054247375946278 | T | T | T |
| 0.3202776745698498 | 0.4984985152633460 | 0.0535229691982295 | T | T | T |
| 0.3051538352958184 | 0.3648405505089360 | 0.0625269190846580 | T | T | T |
| 0.5095876487622134 | 0.5403988278253242 | 0.2901557861570049 | T | T | T |
| 0.5152480505005970 | 0.3652628910581024 | 0.2816030106759210 | T | T | T |
| 0.4429085995621574 | 0.7494402759418315 | 0.6467904317396511 | T | T | T |
| 0.1949461836451188 | 0.7495918913174063 | 0.6501834121871634 | T | T | T |
| 0.2753473280557688 | 0.7496338312214912 | 0.0587894404664040 | T | T | T |
| 0.1065027261429974 | 0.7490761625779164 | 0.0559310185719326 | T | T | T |
| 0.0599086765657430 | 0.2482549199350427 | 0.1380061180103816 | T | T | T |
| 0.3063696774924146 | 0.2486481101381111 | 0.1536869653265194 | T | T | T |
| 0.2246995043757889 | 0.2504542268340302 | 0.5551533768413992 | T | T | T |
| 0.3901428613152026 | 0.2485594887891366 | 0.5526590329508397 | T | T | T |
| 0.5589606367869705 | 0.2500024802725640 | 0.3551143128200989 | T | T | T |
| 0.8194259911421363 | 0.2521776831043408 | 0.3814082001774429 | T | T | T |
| 0.7249462102166152 | 0.2490096260961651 | 0.9982820467934883 | T | T | T |
| 0.8971079668233745 | 0.2517868167356034 | 0.9487833516221719 | T | T | T |
| 0.9133676271969464 | 0.7507784128785505 | 0.8845144516020207 | T | T | T |
| 0.6804506318585181 | 0.7434093963256543 | 0.8863409360527540 | T | T | T |
| 0.5846990789835703 | 0.7511102377200480 | 0.4654830751237277 | T | T | T |
| 0.7896401521718491 | 0.6798522979449438 | 0.0829919467673072 | T | T | T |
| 0.6825741487425971 | 0.7498001065144688 | 0.1583345135854792 | T | T | T |
| 0.8717290805343904 | 0.7910225408870392 | 0.0941869168830639 | T | T | T |
| 0.7878680068892284 | 0.7521000440551242 | 0.5072748562387844 | T | T | T |
| 0.9127406874829702 | 0.6700433757630774 | 0.8219398614912391 | T | T | T |
| 0.6723672815490095 | 0.8279016038686053 | 0.8478837296640527 | T | T | T |

**Structure files (CONTCAR) involved in this work:**

|                    |                    |                    |   |   |   |
|--------------------|--------------------|--------------------|---|---|---|
| 0.7666905015343879 | 0.6686740256245826 | 0.4848077480208828 | T | T | T |
| 0.6960954858778716 | 0.6896356094521354 | 0.0632633935469806 | T | T | T |
| 0.6790974665453940 | 0.8181626665229634 | 0.0756135939270929 | T | T | T |
| 0.8624213855228066 | 0.7148508052012434 | 0.0055331633695487 | T | T | T |
| 0.9135260678746259 | 0.7848925203780037 | 0.1843297314260155 | T | T | T |
| 0.8825951131420229 | 0.7346941153114247 | 0.2540287505464109 | T | T | T |
| 0.9135798067233845 | 0.8350446652593907 | 0.2182224744602277 | T | T | T |
| 0.8882342088285911 | 0.8280679729910159 | 0.0511281276683018 | T | T | T |
| 0.9646918009994677 | 0.7717481541047420 | 0.1616268178638952 | T | T | T |
| 0.8299949217893068 | 0.7470937436195536 | 0.2692739412832319 | T | T | T |
| 0.9078436280301110 | 0.7358581180851502 | 0.3268114453102697 | T | T | T |
| 0.8870773410226310 | 0.6829096479568503 | 0.2261198207239172 | T | T | T |
| 0.7972111055990186 | 0.6904872950412545 | 0.1538242108787562 | T | T | T |

**Figure 4(b) Route(a)-Cu ④**

Si O Al Cu C H

1.0000000000000000

20.0219993591000005 0.0000000000000000 0.0000000000000000

0.0000000000000000 19.8990001678000006 0.0000000000000000

0.0000000000000000 0.0000000000000000 13.3830003737999998

93 195 3 3 2 7

Selective dynamics

Direct

|                    |                    |                    |   |   |   |
|--------------------|--------------------|--------------------|---|---|---|
| 0.4196976507880079 | 0.0536966060173956 | 0.6422184136613561 | T | T | T |
| 0.2985903622438020 | 0.0265576868907042 | 0.7851016832762915 | T | T | T |
| 0.2775864181741430 | 0.0641047121682561 | 0.0058876892958222 | T | T | T |
| 0.1178816179310846 | 0.0647960126969880 | 0.0058889520939664 | T | T | T |
| 0.0644622121670590 | 0.0249310762032181 | 0.7956387074872474 | T | T | T |
| 0.1736624766120422 | 0.0512617868899612 | 0.6451129645596846 | T | T | T |
| 0.4200960819439219 | 0.8272461372936826 | 0.6619845780440364 | T | T | T |
| 0.3021939944607497 | 0.8691041497673941 | 0.8039779195488213 | T | T | T |
| 0.2689892184398817 | 0.8279500640675187 | 0.0261467958796344 | T | T | T |
| 0.1145240194477500 | 0.8257615043121318 | 0.0163437620335805 | T | T | T |
| 0.0643795908014866 | 0.8644364706719972 | 0.8005012615678113 | T | T | T |
| 0.1809571412084823 | 0.8269516915959680 | 0.6657995488112425 | T | T | T |
| 0.0738393312209193 | 0.9438298722166303 | 0.1435095685296086 | T | T | T |
| 0.1959002656971340 | 0.9721509031460431 | 0.2861684224714513 | T | T | T |
| 0.2158148246666074 | 0.9339129028314359 | 0.5062229247555111 | T | T | T |
| 0.3747611077491437 | 0.9306321824993098 | 0.5087699507782523 | T | T | T |
| 0.4281065363358066 | 0.9714444103162968 | 0.3008997047733642 | T | T | T |
| 0.3215106442864478 | 0.9477277059001727 | 0.1461454494044249 | T | T | T |
| 0.0771514625833838 | 0.1705419496815604 | 0.1610679972412443 | T | T | T |
| 0.1957002508553919 | 0.1295575990406324 | 0.3036336447902320 | T | T | T |
| 0.2274266851873220 | 0.1715151669770114 | 0.5223531730673933 | T | T | T |
| 0.3824009314087358 | 0.1723090056228903 | 0.5099280129917643 | T | T | T |
| 0.4328206595294229 | 0.1283373100218911 | 0.3005932117790239 | T | T | T |
| 0.3176747074875115 | 0.1688964030439401 | 0.1673289717501670 | T | T | T |
| 0.5721294607962866 | 0.5564735946452853 | 0.3566123422796466 | T | T | T |
| 0.6914479061918252 | 0.5267165092041552 | 0.2179611950634324 | T | T | T |
| 0.7111171406214227 | 0.5461082340678606 | 0.9891590396255351 | T | T | T |
| 0.8686629339411597 | 0.5636740422450445 | 0.9875320228047396 | T | T | T |
| 0.9312236357282718 | 0.5305792305646027 | 0.1941012696982036 | T | T | T |
| 0.8184850439502422 | 0.5619746287467962 | 0.3350334718125285 | T | T | T |

**Structure files (CONTCAR) involved in this work:**

|                    |                    |                    |   |   |   |
|--------------------|--------------------|--------------------|---|---|---|
| 0.5789394782251623 | 0.3267561714078171 | 0.3292815495801953 | T | T | T |
| 0.7011331138049969 | 0.3698008465262914 | 0.2094015033721533 | T | T | T |
| 0.7316866439250276 | 0.3292626011208812 | 0.9896211892724917 | T | T | T |
| 0.8870304223158341 | 0.3293507165590397 | 0.9925579198238658 | T | T | T |
| 0.9342592847472004 | 0.3729024480733513 | 0.2035465100666912 | T | T | T |
| 0.8238674207264515 | 0.3297115863889520 | 0.3462421687228114 | T | T | T |
| 0.9236297631371114 | 0.4435693906680159 | 0.8546041660611140 | T | T | T |
| 0.8035913125859424 | 0.4657821743123152 | 0.7182255882539902 | T | T | T |
| 0.7803277788497511 | 0.4459840489662287 | 0.4916671529984047 | T | T | T |
| 0.6206251560877419 | 0.4323042709563242 | 0.4898249086326391 | T | T | T |
| 0.5638501555000385 | 0.4617958761589680 | 0.6995840605382304 | T | T | T |
| 0.6764350767212545 | 0.4275536139682087 | 0.8372604908278732 | T | T | T |
| 0.7942600584469580 | 0.6205969847659877 | 0.7040403100807554 | T | T | T |
| 0.6056697418404835 | 0.6735224301219546 | 0.4845576870732200 | T | T | T |
| 0.5669058197897832 | 0.6202845130788953 | 0.7005740623074563 | T | T | T |
| 0.6735089225191828 | 0.6681847091957418 | 0.8469786598106412 | T | T | T |
| 0.5735386726470493 | 0.9445316447279142 | 0.3591325531078364 | T | T | T |
| 0.6949083151868268 | 0.9756897807862333 | 0.2222110512437669 | T | T | T |
| 0.7116711689866704 | 0.9500392665550460 | 0.9944184789822629 | T | T | T |
| 0.8722862275665817 | 0.9434968665113225 | 0.9877709591080294 | T | T | T |
| 0.9290471238357438 | 0.9687489130520879 | 0.1997523266652167 | T | T | T |
| 0.8176455322588538 | 0.9334398901990523 | 0.3420140247113237 | T | T | T |
| 0.5785926545116858 | 0.1734403068815366 | 0.3292540170836613 | T | T | T |
| 0.7019433289107051 | 0.1314965899820072 | 0.2095231094095978 | T | T | T |
| 0.7340503754199594 | 0.1680497759412191 | 0.9888096698130662 | T | T | T |
| 0.8903203517967307 | 0.1766594981568305 | 0.9860834298775155 | T | T | T |
| 0.9341472281132602 | 0.1267261434089142 | 0.2013998888805660 | T | T | T |
| 0.8235244648553162 | 0.1752265093157161 | 0.3431391454079221 | T | T | T |
| 0.9211605282171905 | 0.0642909329179761 | 0.8529507227441904 | T | T | T |
| 0.8035267004320019 | 0.0339027307689762 | 0.7132699805064492 | T | T | T |
| 0.7811393879337701 | 0.0572084437810175 | 0.4866656918566067 | T | T | T |
| 0.6209425895009237 | 0.0691050665113750 | 0.4901104017304039 | T | T | T |
| 0.5646582196309262 | 0.0362057011718579 | 0.6997318208836705 | T | T | T |
| 0.6771245062101680 | 0.0665534374234485 | 0.8383986032910707 | T | T | T |
| 0.9129829504919085 | 0.8290658878399967 | 0.8309155175310873 | T | T | T |
| 0.7958021821812952 | 0.8767640685874044 | 0.7084954074493862 | T | T | T |
| 0.7661012174787982 | 0.8288513237118293 | 0.4904347383509248 | T | T | T |
| 0.6078932920791850 | 0.8251404707781450 | 0.4926431835550422 | T | T | T |
| 0.5638021771539952 | 0.8779259550157076 | 0.7052516938086254 | T | T | T |
| 0.4199786615280835 | 0.4433159200370794 | 0.6434774135313229 | T | T | T |
| 0.3000939041304175 | 0.4723406505070538 | 0.7874441386023511 | T | T | T |
| 0.2800804938579073 | 0.4337711550831822 | 0.0070842674315663 | T | T | T |
| 0.1209419013370619 | 0.4314360292215560 | 0.0080839571966157 | T | T | T |
| 0.0699223307138372 | 0.4715786358808813 | 0.7992211387362740 | T | T | T |
| 0.1767323541349460 | 0.4476563210537498 | 0.6470127164774606 | T | T | T |
| 0.4224397046750831 | 0.6715342760309515 | 0.6636616428970811 | T | T | T |
| 0.3042320583594275 | 0.6288329149381708 | 0.8047877766629813 | T | T | T |
| 0.2699633751608911 | 0.6715661916964152 | 0.0259515918520387 | T | T | T |
| 0.1163590498593206 | 0.6729878475990020 | 0.0130694282562449 | T | T | T |
| 0.0678844823806831 | 0.6297311133285513 | 0.8017810226281193 | T | T | T |
| 0.1825528218023839 | 0.6686308695107434 | 0.6644869153158903 | T | T | T |
| 0.0757983030077807 | 0.5550123601242593 | 0.1396995785660418 | T | T | T |
| 0.1963044263927444 | 0.5261547582423768 | 0.2829943578393100 | T | T | T |

**Structure files (CONTCAR) involved in this work:**

|                    |                     |                    |   |   |   |
|--------------------|---------------------|--------------------|---|---|---|
| 0.2180716546006865 | 0.5632176915969702  | 0.5047040733323107 | T | T | T |
| 0.3773464947706289 | 0.5664096796634485  | 0.5088173787151722 | T | T | T |
| 0.4283409040308068 | 0.5257142904488700  | 0.3000264285454332 | T | T | T |
| 0.3226193051055995 | 0.5513253055651831  | 0.1445553890954075 | T | T | T |
| 0.0778252823174030 | 0.3255616407376882  | 0.1632081080304513 | T | T | T |
| 0.1953456833084236 | 0.3685407785193951  | 0.3040013496828788 | T | T | T |
| 0.2294515527934760 | 0.3279188304048708  | 0.5236861505862983 | T | T | T |
| 0.3844620971495152 | 0.3243958396765148  | 0.5118123902665278 | T | T | T |
| 0.4336547250537700 | 0.3696127835495510  | 0.3017951309360851 | T | T | T |
| 0.3182309390459863 | 0.3279976090822563  | 0.1686701990650030 | T | T | T |
| 0.3534904241983908 | 0.0598261881086836  | 0.7114271658246056 | T | T | T |
| 0.2959716772924060 | 0.0698105517788082  | 0.8881512816059353 | T | T | T |
| 0.1975525755476814 | 0.0537418441009828  | 0.0216693512449739 | T | T | T |
| 0.0987095877217988 | 0.0651474177396912  | 0.8884258509944722 | T | T | T |
| 0.0987847596570294 | 0.0493385100587785  | 0.6919351957141288 | T | T | T |
| 0.2256774280196677 | 0.0287946201186061  | 0.7322414167545594 | T | T | T |
| 0.3598590397324649 | 0.8297322655125566  | 0.7432517262323799 | T | T | T |
| 0.3003353026103547 | 0.8385000859981607  | 0.9158752072468300 | T | T | T |
| 0.1911060504932673 | 0.8521275322406674  | 0.0270796877128157 | T | T | T |
| 0.0930825112693454 | 0.8281136273113434  | 0.9000340796770274 | T | T | T |
| 0.1042134437370103 | 0.8373186630577228  | 0.7027607932908665 | T | T | T |
| 0.2298890658807746 | 0.8583947339453983  | 0.7509082162179002 | T | T | T |
| 0.3184554276729341 | 0.9490446765665431  | 0.8088052891652470 | T | T | T |
| 0.0744830418562753 | 0.9448384306820429  | 0.8129215228469018 | T | T | T |
| 0.4277164599272952 | 0.1221022926435995  | 0.5766737063667852 | T | T | T |
| 0.4155704016160185 | 0.9899872927781010  | 0.5659809405847103 | T | T | T |
| 0.3937988501426580 | 0.8580100494215319  | 0.5560777954455708 | T | T | T |
| 0.1891220546123095 | 0.1269239017243529  | 0.6060123034859257 | T | T | T |
| 0.1770427073207789 | -0.0012318857912346 | 0.5521613117183113 | T | T | T |
| 0.1917462277979143 | 0.8648038405924786  | 0.5595372450866978 | T | T | T |
| 0.9853172937809348 | 0.0414498704040823  | 0.7876380304909280 | T | T | T |
| 0.9866100149520765 | 0.8445279985392828  | 0.7861774138199769 | T | T | T |
| 0.1392356485313775 | 0.9404153048114207  | 0.2139969505923700 | T | T | T |
| 0.1979827708974331 | 0.9282585496827190  | 0.3882581103184439 | T | T | T |
| 0.2954365672885259 | 0.9450888990116099  | 0.5231924135314819 | T | T | T |
| 0.3939133930327710 | 0.9287501166471358  | 0.3910073663002991 | T | T | T |
| 0.3957833959485558 | 0.9511021005559568  | 0.1939380455228246 | T | T | T |
| 0.2680704999170351 | 0.9689110819640390  | 0.2318353394474664 | T | T | T |
| 0.1413171360618045 | 0.1673054539662033  | 0.2341641071719410 | T | T | T |
| 0.1919143118770590 | 0.1627003952797066  | 0.4139689197682850 | T | T | T |
| 0.3049315828589140 | 0.1471431014936239  | 0.5140993050017897 | T | T | T |
| 0.4081820785675517 | 0.1732394689030014  | 0.3949254123238743 | T | T | T |
| 0.3948782729594753 | 0.1542011341173233  | 0.1997230704726035 | T | T | T |
| 0.2698290188577232 | 0.1397346536756081  | 0.2560320612386899 | T | T | T |
| 0.1781345280165672 | 0.0500628070164180  | 0.3108229208994526 | T | T | T |
| 0.4145851515362382 | 0.0505235207240634  | 0.3237163352918027 | T | T | T |
| 0.0658579535941191 | 0.8726694090109877  | 0.0842471321921213 | T | T | T |
| 0.0783141519323581 | 0.0040704294872618  | 0.0617510819227227 | T | T | T |
| 0.0947451090997233 | 0.1361010121247994  | 0.0539813911691090 | T | T | T |
| 0.3095481022875429 | 0.8713972545623596  | 0.1082533160327168 | T | T | T |
| 0.3160968476061018 | -0.0007777417815725 | 0.0521614696377329 | T | T | T |
| 0.3011945484041886 | 0.1326911716337061  | 0.0613699596862919 | T | T | T |
| 0.5072604851167355 | 0.9558864898513438  | 0.2916946972363448 | T | T | T |

**Structure files (CONTCAR) involved in this work:**

|                    |                    |                    |   |   |   |
|--------------------|--------------------|--------------------|---|---|---|
| 0.5130346537742680 | 0.1355015260763465 | 0.2848684436998054 | T | T | T |
| 0.6351937444244785 | 0.5661697772615831 | 0.2807798236137091 | T | T | T |
| 0.6782948205476697 | 0.5382777116637901 | 0.0993387090363538 | T | T | T |
| 0.7913202296613030 | 0.5398633332337164 | 0.9965749018154851 | T | T | T |
| 0.9019509563901215 | 0.5700082006864926 | 0.0976525914976606 | T | T | T |
| 0.8942011836297498 | 0.5586152328801486 | 0.2945515989477985 | T | T | T |
| 0.7652826707254867 | 0.5570683659354949 | 0.2445725845903358 | T | T | T |
| 0.6377295290289388 | 0.3258404419784771 | 0.2455191997192739 | T | T | T |
| 0.7040963789742469 | 0.3669346180583956 | 0.0889598919223264 | T | T | T |
| 0.8094663720306123 | 0.3511522873673358 | 0.9761147988365748 | T | T | T |
| 0.9055798270150475 | 0.3293164752865650 | 0.1106466095656067 | T | T | T |
| 0.8985405610067994 | 0.3480863266498773 | 0.3060268545155220 | T | T | T |
| 0.7706766895305884 | 0.3415690003930327 | 0.2555081457350983 | T | T | T |
| 0.6904667382803806 | 0.4473268754830597 | 0.2458291223621521 | T | T | T |
| 0.9154605591139545 | 0.4512013891551527 | 0.1823264603448261 | T | T | T |
| 0.5563772978654312 | 0.6239767689567179 | 0.4201816859938067 | T | T | T |
| 0.5862844221136762 | 0.4952107721621549 | 0.4335269759947764 | T | T | T |
| 0.6071313213596308 | 0.3631833555648258 | 0.4291147311034624 | T | T | T |
| 0.8139794254469087 | 0.6397425478914037 | 0.3857429699265893 | T | T | T |
| 0.8029801957157314 | 0.5094505944224637 | 0.4220893611694229 | T | T | T |
| 0.8061187174784059 | 0.3767524502434876 | 0.4411223289029557 | T | T | T |
| 0.0098569960471399 | 0.5454116488293886 | 0.2093389640591412 | T | T | T |
| 0.0145389065487676 | 0.3643261538698798 | 0.2141208120708036 | T | T | T |
| 0.8617574360383994 | 0.4266219155509995 | 0.7803270046609119 | T | T | T |
| 0.8154595578041396 | 0.4534156473477155 | 0.5997248206863975 | T | T | T |
| 0.7000363188570605 | 0.4458242086703388 | 0.5011532916142105 | T | T | T |
| 0.5870542632915539 | 0.4231625040036455 | 0.5986936390112382 | T | T | T |
| 0.6011503776531348 | 0.4265243317130244 | 0.7937869211993436 | T | T | T |
| 0.7305935318651290 | 0.4351946689127136 | 0.7475702141320241 | T | T | T |
| 0.8573298851763083 | 0.6677329472597425 | 0.7263149183880461 | T | T | T |
| 0.7771820149219205 | 0.6157588595981632 | 0.5875015057384173 | T | T | T |
| 0.6809645179970890 | 0.6605049295103981 | 0.4493274954133293 | T | T | T |
| 0.5973289138677799 | 0.6590894617814764 | 0.6046708573712140 | T | T | T |
| 0.6001051779231703 | 0.6482011216206647 | 0.8043552969727794 | T | T | T |
| 0.7291710238486885 | 0.6482043664499848 | 0.7665569149992660 | T | T | T |
| 0.8077841253433315 | 0.5444296632446289 | 0.7484794522867366 | T | T | T |
| 0.5841765534904314 | 0.5406061008328255 | 0.6920095139213100 | T | T | T |
| 0.9345818392121380 | 0.3809826563072514 | 0.9314150695854418 | T | T | T |
| 0.9101299055055834 | 0.5106884876153701 | 0.9210409506089949 | T | T | T |
| 0.8742518290008844 | 0.6374097299830087 | 0.9338447458550163 | T | T | T |
| 0.6888420553058613 | 0.3573137947910515 | 0.8958161899199835 | T | T | T |
| 0.6815653425811978 | 0.4919933205156998 | 0.9125825393527124 | T | T | T |
| 0.6881976592895108 | 0.6232581373397436 | 0.9538594462132655 | T | T | T |
| 0.4840447477174986 | 0.4532236152431314 | 0.7163574818767842 | T | T | T |
| 0.4866079803438479 | 0.6310893590994633 | 0.7077211669425637 | T | T | T |
| 0.6368997243787206 | 0.9372154239330180 | 0.2838488832719369 | T | T | T |
| 0.6809728215069509 | 0.9677135101124563 | 0.1035637652982640 | T | T | T |
| 0.7922796723082655 | 0.9528079251886259 | 0.9955341982457956 | T | T | T |
| 0.9032136808295240 | 0.9307477283789211 | 0.0988766918755175 | T | T | T |
| 0.8932029541324277 | 0.9358723827183721 | 0.2969393870391795 | T | T | T |
| 0.7666701368133855 | 0.9418420302709324 | 0.2474617037403057 | T | T | T |
| 0.6361263966704914 | 0.1730050968775998 | 0.2433555885883870 | T | T | T |
| 0.7067515468858497 | 0.1308023416586675 | 0.0888422746692185 | T | T | T |

**Structure files (CONTCAR) involved in this work:**

|                    |                    |                    |   |   |   |
|--------------------|--------------------|--------------------|---|---|---|
| 0.8130833470436786 | 0.1519158032677093 | 0.9748355771967178 | T | T | T |
| 0.9124329642054729 | 0.1678882814493105 | 0.1019041659702005 | T | T | T |
| 0.8976354820547321 | 0.1588004191287532 | 0.2989361590237089 | T | T | T |
| 0.7693298814023678 | 0.1662059276482665 | 0.2531930183288462 | T | T | T |
| 0.6955495378681238 | 0.0550508481037835 | 0.2521224509280649 | T | T | T |
| 0.9119426687647025 | 0.0483666846653824 | 0.1908141991931796 | T | T | T |
| 0.5642269922975974 | 0.8771744134620350 | 0.4252087050986572 | T | T | T |
| 0.5832820925248176 | 0.0080330985950853 | 0.4333952530769049 | T | T | T |
| 0.6065949085553682 | 0.1386965823997106 | 0.4304945351847389 | T | T | T |
| 0.8069698215232373 | 0.8616129494424795 | 0.3959056809265432 | T | T | T |
| 0.8070301709414287 | 0.9949372539713449 | 0.4193897320343348 | T | T | T |
| 0.8057153942456985 | 0.1274305302048349 | 0.4369282216042031 | T | T | T |
| 0.0085221657412487 | 0.9554416913202678 | 0.2131894497936884 | T | T | T |
| 0.0147525461162713 | 0.1322180013330402 | 0.2150927946011350 | T | T | T |
| 0.8582091962862158 | 0.0753280218390118 | 0.7786638909088727 | T | T | T |
| 0.8144532322470300 | 0.0520938477335709 | 0.5965107008091051 | T | T | T |
| 0.7004947167006781 | 0.0548650932555598 | 0.4952030257306865 | T | T | T |
| 0.5903659582518721 | 0.0767048406318930 | 0.6012783683062701 | T | T | T |
| 0.6011243979816411 | 0.0691764157326696 | 0.7969306438851973 | T | T | T |
| 0.7285248039265734 | 0.0570640364676006 | 0.7453719205400505 | T | T | T |
| 0.8615209738763704 | 0.8318532533680554 | 0.7380263416561341 | T | T | T |
| 0.7842004132429264 | 0.8734209619483436 | 0.5886036179621270 | T | T | T |
| 0.6864500026353342 | 0.8361539443156962 | 0.4667780851325755 | T | T | T |
| 0.5955660755616924 | 0.8369769842709273 | 0.6108673600324038 | T | T | T |
| 0.5922389777010935 | 0.8492481256627992 | 0.8085296463643492 | T | T | T |
| 0.7323057976680638 | 0.8527508614719039 | 0.7704442208170097 | T | T | T |
| 0.8149261045485742 | 0.9548067700474773 | 0.7358900379991961 | T | T | T |
| 0.5829344900924560 | 0.9572469603563674 | 0.6891498016039299 | T | T | T |
| 0.9377245735281993 | 0.1343072398222983 | 0.9105776653904881 | T | T | T |
| 0.9052063907350366 | 0.0108646315364377 | 0.9416090126524039 | T | T | T |
| 0.8936532272545552 | 0.8812161949213060 | 0.9183041127474423 | T | T | T |
| 0.6928928845615481 | 0.1371896415112454 | 0.8952200072890487 | T | T | T |
| 0.6831976380761566 | 0.0025545566647944 | 0.9135472099214318 | T | T | T |
| 0.6850087102481046 | 0.8732450946863335 | 0.9693993305351940 | T | T | T |
| 0.4846037234070120 | 0.0464244091119150 | 0.7137739062672274 | T | T | T |
| 0.4823796954920421 | 0.8709045387149243 | 0.7031436212528361 | T | T | T |
| 0.3534785572097379 | 0.4386229999628148 | 0.7117951818391095 | T | T | T |
| 0.2971673602944238 | 0.4274431721711276 | 0.8889383489334952 | T | T | T |
| 0.2002529265379902 | 0.4437758290964998 | 0.0252139503752493 | T | T | T |
| 0.1029502355281999 | 0.4284054525429269 | 0.8902951395123765 | T | T | T |
| 0.1018540763060206 | 0.4480826143362733 | 0.6932753882444527 | T | T | T |
| 0.2272837328300561 | 0.4727902659371118 | 0.7344638209623279 | T | T | T |
| 0.3628515305925916 | 0.6676123220745021 | 0.7452945969230412 | T | T | T |
| 0.3004854892655967 | 0.6618178505577672 | 0.9150091930910249 | T | T | T |
| 0.1925288171176274 | 0.6465345505260195 | 0.0287876267331254 | T | T | T |
| 0.0988766550353219 | 0.6722389397586979 | 0.8954520039983427 | T | T | T |
| 0.1063356786234621 | 0.6550117901987973 | 0.7007463355907297 | T | T | T |
| 0.2332013835456597 | 0.6377352312684210 | 0.7478487357933520 | T | T | T |
| 0.3216704002987676 | 0.5491313649849481 | 0.8135494626700158 | T | T | T |
| 0.0843962923811413 | 0.5503718400120866 | 0.8210583896991481 | T | T | T |
| 0.4288761050760956 | 0.3733799041864166 | 0.5821693709349746 | T | T | T |
| 0.4169752692481593 | 0.5054709021882987 | 0.5643598698857406 | T | T | T |
| 0.3978115168455053 | 0.6377891984017784 | 0.5589612774261645 | T | T | T |

**Structure files (CONTCAR) involved in this work:**

|                    |                    |                    |   |   |   |
|--------------------|--------------------|--------------------|---|---|---|
| 0.1943479343513024 | 0.3719648622870670 | 0.6108271153671488 | T | T | T |
| 0.1796528598614721 | 0.4986474840251137 | 0.5521869575150283 | T | T | T |
| 0.1944730257303886 | 0.6328045089322061 | 0.5567905006052394 | T | T | T |
| 0.9906183824879615 | 0.4556848294589229 | 0.7900800592382312 | T | T | T |
| 0.9895840944259539 | 0.6420809262759308 | 0.7930053240728521 | T | T | T |
| 0.1401153440959534 | 0.5603664425232054 | 0.2121914749915461 | T | T | T |
| 0.1992292877331918 | 0.5677430313775796 | 0.3870195969472498 | T | T | T |
| 0.2978282506406336 | 0.5526592357457664 | 0.5213056678775291 | T | T | T |
| 0.3970036043422802 | 0.5694625614140654 | 0.3913166017214519 | T | T | T |
| 0.3963361163616510 | 0.5477275753136767 | 0.1938362949873103 | T | T | T |
| 0.2685622062622000 | 0.5297914395391635 | 0.2291301116683813 | T | T | T |
| 0.1401510463399146 | 0.3275383940426999 | 0.2400172796047327 | T | T | T |
| 0.1925057892046494 | 0.3403695784603686 | 0.4173054952924798 | T | T | T |
| 0.3073100828226090 | 0.3504590093152317 | 0.5124966068719246 | T | T | T |
| 0.4129638068178055 | 0.3250581553600630 | 0.3983829910078207 | T | T | T |
| 0.3952347722159629 | 0.3411233870927954 | 0.2032125417692187 | T | T | T |
| 0.2692127110467504 | 0.3569062345200434 | 0.2561462689569400 | T | T | T |
| 0.1769266368645489 | 0.4480438622235505 | 0.3030802592238704 | T | T | T |
| 0.4124325874383470 | 0.4470189001916464 | 0.3228097825860630 | T | T | T |
| 0.0667285892536749 | 0.6244275851938661 | 0.0768950819956007 | T | T | T |
| 0.0804825345678257 | 0.4924809745098897 | 0.0620190567796243 | T | T | T |
| 0.0981658495918141 | 0.3606321063861995 | 0.0578599989326472 | T | T | T |
| 0.3114837168146870 | 0.6277760049886464 | 0.1066738577834268 | T | T | T |
| 0.3184734104167510 | 0.4995281848981027 | 0.0507935412457648 | T | T | T |
| 0.3044363785147880 | 0.3656164053896971 | 0.0629189494392567 | T | T | T |
| 0.5078538583717270 | 0.5381953111714834 | 0.2884764650413950 | T | T | T |
| 0.5139385059605532 | 0.3651264027624666 | 0.2836085225905350 | T | T | T |
| 0.4413438908716345 | 0.7494796252214350 | 0.6433087052076218 | T | T | T |
| 0.1968462485467089 | 0.7480753001232735 | 0.6496343775248087 | T | T | T |
| 0.2749469059487196 | 0.7497553780386338 | 0.0582499354386472 | T | T | T |
| 0.1073874837839448 | 0.7489109592722418 | 0.0562837626789495 | T | T | T |
| 0.0576483651238399 | 0.2483338752501481 | 0.1400996644136906 | T | T | T |
| 0.3050470339335827 | 0.2485895011461073 | 0.1522565935000026 | T | T | T |
| 0.2232713836112278 | 0.2496641029351923 | 0.5561592456696629 | T | T | T |
| 0.3889503005239438 | 0.2480901319423769 | 0.5543492956642420 | T | T | T |
| 0.5590772349491110 | 0.2502336753271665 | 0.3568969742164287 | T | T | T |
| 0.8216323092440037 | 0.2522692498172857 | 0.3829754177955835 | T | T | T |
| 0.7224818706405907 | 0.2486548465345721 | 0.9976397315791458 | T | T | T |
| 0.8984075604503299 | 0.2540703711413342 | 0.9512064497804960 | T | T | T |
| 0.9117061004843610 | 0.7537613445542597 | 0.8829219984465072 | T | T | T |
| 0.6774338539216622 | 0.7438852702297231 | 0.8871202439030741 | T | T | T |
| 0.5821257779995767 | 0.7503920117586265 | 0.4633290239251569 | T | T | T |
| 0.7910944019642487 | 0.6852450842456185 | 0.0905635777702575 | T | T | T |
| 0.6768360636776363 | 0.7469142963102228 | 0.1634700049179411 | T | T | T |
| 0.8386088108041664 | 0.7982155210461294 | 0.0763171599102083 | T | T | T |
| 0.7889321769194757 | 0.7520208774025186 | 0.5022751082481482 | T | T | T |
| 0.9128000525342557 | 0.6725790315225642 | 0.8228859329866645 | T | T | T |
| 0.6707375513136735 | 0.8287062356252304 | 0.8518911448945091 | T | T | T |
| 0.7607602012572164 | 0.6708242379594355 | 0.4923379279393181 | T | T | T |
| 0.6961369397834457 | 0.6869019480288565 | 0.0696838961379330 | T | T | T |
| 0.6772462534178680 | 0.8150310683449231 | 0.0796840032129675 | T | T | T |
| 0.8550750434858334 | 0.7225260463703664 | 0.0006297866561403 | T | T | T |
| 0.9614409579216338 | 0.7703265304797604 | 0.2653920717295573 | T | T | T |



**Structure files (CONTCAR) involved in this work:**

|                    |                    |                    |   |   |   |
|--------------------|--------------------|--------------------|---|---|---|
| 0.9342230318444126 | 0.7381369526252559 | 0.3429124281165976 | T | T | T |
| 0.9437702865469967 | 0.8202033051528805 | 0.2440192846021572 | T | T | T |
| 0.8806916667271660 | 0.8191435052636350 | 0.0968454606070801 | T | T | T |
| 1.0034741064553401 | 0.7498941794467781 | 0.2230653424041949 | T | T | T |
| 0.8944066645271085 | 0.7617535645227776 | 0.3867812408584483 | T | T | T |
| 0.9539647946649860 | 0.6897564508136351 | 0.3682079690668428 | T | T | T |
| 0.8463395962470923 | 0.6727591713997414 | 0.3596258122217481 | T | T | T |
| 0.7957614632045485 | 0.7236959504856809 | 0.1376088907543052 | T | T | T |

**Figure 4(b) Route(b-i)-Cu ① as same as Route(a)-Cu ①****Figure 4(b) Route(b-i)-Cu ②**

|                     |                     |                     |    |   |   |
|---------------------|---------------------|---------------------|----|---|---|
| Si                  | O                   | Al                  | Cu | C | H |
| 1.0000000000000000  |                     |                     |    |   |   |
| 20.0219993591000005 | 0.0000000000000000  | 0.0000000000000000  |    |   |   |
| 0.0000000000000000  | 19.8990001678000006 | 0.0000000000000000  |    |   |   |
| 0.0000000000000000  | 0.0000000000000000  | 13.3830003737999998 |    |   |   |
| 93                  | 195                 | 3                   | 3  | 2 | 7 |

## Selective dynamics

## Direct

|                    |                    |                    |   |   |   |
|--------------------|--------------------|--------------------|---|---|---|
| 0.4212072609358669 | 0.0540010671253087 | 0.6370878790300027 | T | T | T |
| 0.3018925895133980 | 0.0255313408034822 | 0.7830385895282836 | T | T | T |
| 0.2798085066307228 | 0.0632952529237287 | 0.0026186067337974 | T | T | T |
| 0.1203765489161211 | 0.0642082918196617 | 0.0017633628790486 | T | T | T |
| 0.0709655095024086 | 0.0311679780012813 | 0.7899646557561035 | T | T | T |
| 0.1801295468006815 | 0.0531225071128875 | 0.6413995012773167 | T | T | T |
| 0.4210897858077832 | 0.8265816924586431 | 0.6631875193502413 | T | T | T |
| 0.3001798783997887 | 0.8680887266516291 | 0.8012537962056300 | T | T | T |
| 0.2666399171022699 | 0.8276014261264905 | 0.0229131189675899 | T | T | T |
| 0.1117322388306568 | 0.8260620062364051 | 0.0154703893184195 | T | T | T |
| 0.0625423298299136 | 0.8748411993657458 | 0.8044862155882935 | T | T | T |
| 0.1745479515237454 | 0.8286280462894179 | 0.6683759994272166 | T | T | T |
| 0.0757459070854119 | 0.9451607239839732 | 0.1416133772013898 | T | T | T |
| 0.1974000626189226 | 0.9720136287299854 | 0.2869354179904726 | T | T | T |
| 0.2164198601038866 | 0.9322647807710183 | 0.5057621758728179 | T | T | T |
| 0.3764738525035108 | 0.9288187199106618 | 0.5060532306293052 | T | T | T |
| 0.4287666667912344 | 0.9692264492879188 | 0.2972977969987394 | T | T | T |
| 0.3211681434360141 | 0.9469823280783433 | 0.1445512837903113 | T | T | T |
| 0.0772471092872630 | 0.1687893879065435 | 0.1605313779226057 | T | T | T |
| 0.1956208534589852 | 0.1288739233016728 | 0.3046716750861832 | T | T | T |
| 0.2325956656736490 | 0.1731696044420647 | 0.5190889353988375 | T | T | T |
| 0.3869495942065275 | 0.1735045556491943 | 0.5048213880475276 | T | T | T |
| 0.4345877973613569 | 0.1267490511799509 | 0.2951431821729105 | T | T | T |
| 0.3168325458927583 | 0.1681692369991720 | 0.1647928443673291 | T | T | T |
| 0.5747477333635468 | 0.5568806353524803 | 0.3552899763853870 | T | T | T |
| 0.6969043332542472 | 0.5327781633921760 | 0.2195492701646232 | T | T | T |
| 0.7154660546795913 | 0.5519733750003535 | 0.9868563115806953 | T | T | T |
| 0.8735865228438484 | 0.5642613347408453 | 0.9939890585787243 | T | T | T |
| 0.9288494380240283 | 0.5200308386858408 | 0.2035399037382453 | T | T | T |
| 0.8209867451308149 | 0.5608044292405157 | 0.3492659182649943 | T | T | T |
| 0.5798864365941663 | 0.3262432704197215 | 0.3287784419880709 | T | T | T |
| 0.7056050243059491 | 0.3743059525450958 | 0.2123154686561447 | T | T | T |
| 0.7308739831076030 | 0.3288290482851717 | 0.9924709218350212 | T | T | T |
| 0.8890400169104550 | 0.3254720395906460 | 0.9955227164148341 | T | T | T |

**Structure files (CONTCAR) involved in this work:**

|                    |                    |                    |   |   |   |
|--------------------|--------------------|--------------------|---|---|---|
| 0.9363062872417258 | 0.3624477720310325 | 0.2092402903164486 | T | T | T |
| 0.8248691578554147 | 0.3260015187441329 | 0.3491840386180561 | T | T | T |
| 0.9240661605051358 | 0.4445025357208092 | 0.8615194714111353 | T | T | T |
| 0.8026998788231798 | 0.4664716615917742 | 0.7238290820885489 | T | T | T |
| 0.7807210025316006 | 0.4408253398787039 | 0.4973469046255291 | T | T | T |
| 0.6199432849052089 | 0.4303240567394142 | 0.4909248883705630 | T | T | T |
| 0.5632494918184765 | 0.4646727575387367 | 0.7022838632801810 | T | T | T |
| 0.6754175938802860 | 0.4309812973038420 | 0.8431279580903090 | T | T | T |
| 0.7940222793036503 | 0.6242789014317955 | 0.7179839511167146 | T | T | T |
| 0.6123091071004797 | 0.6694217834891155 | 0.4890842082031094 | T | T | T |
| 0.5600859413419580 | 0.6223019425433444 | 0.7005842453335934 | T | T | T |
| 0.6677532512224577 | 0.6667145754866979 | 0.8365282795941275 | T | T | T |
| 0.5753964356937821 | 0.9382753769549080 | 0.3483895240686534 | T | T | T |
| 0.6931808522552479 | 0.9676586426499849 | 0.2036999884573287 | T | T | T |
| 0.7198104378474394 | 0.9533339851557185 | 0.9789793731218699 | T | T | T |
| 0.8752618691394619 | 0.9477890471464531 | 0.9816165235111883 | T | T | T |
| 0.9314939650014907 | 0.9698347038054295 | 0.1952650393530314 | T | T | T |
| 0.8166922771851214 | 0.9291010147033887 | 0.3254101520775715 | T | T | T |
| 0.5803402742188487 | 0.1708665469646880 | 0.3176505677279716 | T | T | T |
| 0.7016954282114385 | 0.1252330706267984 | 0.1985352620070745 | T | T | T |
| 0.7323404720806950 | 0.1699537643009235 | 0.9801057189132647 | T | T | T |
| 0.8899598082065221 | 0.1752727636655428 | 0.9757537669881973 | T | T | T |
| 0.9313239531676899 | 0.1271569734029608 | 0.1962138024087017 | T | T | T |
| 0.8213820947858624 | 0.1724077570881485 | 0.3393490609057179 | T | T | T |
| 0.9255636869660591 | 0.0611688509665172 | 0.8363997185537343 | T | T | T |
| 0.8022270314256449 | 0.0293234636086242 | 0.7036876983732563 | T | T | T |
| 0.7831778101307031 | 0.0511612830080967 | 0.4756932906625361 | T | T | T |
| 0.6228989719141378 | 0.0646006356007069 | 0.4777862765809969 | T | T | T |
| 0.5663595071554097 | 0.0338819815776893 | 0.6888287567102714 | T | T | T |
| 0.6788444021295952 | 0.0702246200939510 | 0.8273316046731553 | T | T | T |
| 0.9143676470855296 | 0.8336931757261514 | 0.8299053814590764 | T | T | T |
| 0.7978799788004030 | 0.8726523082509163 | 0.6944257255944312 | T | T | T |
| 0.7667804344268351 | 0.8330859626472842 | 0.4824464874117284 | T | T | T |
| 0.6120054141678671 | 0.8257810179813809 | 0.4897889522289486 | T | T | T |
| 0.5639746448761229 | 0.8758489563482073 | 0.7021518494196706 | T | T | T |
| 0.4192416313503870 | 0.4442167183768732 | 0.6456198794766564 | T | T | T |
| 0.2985132255545628 | 0.4730850262525065 | 0.7877744109995062 | T | T | T |
| 0.2800749891690701 | 0.4341813143291202 | 0.0091135262500189 | T | T | T |
| 0.1212141478634091 | 0.4319525746126570 | 0.0091340508319079 | T | T | T |
| 0.0690973308128588 | 0.4682841752888210 | 0.7990163486338648 | T | T | T |
| 0.1757662386450183 | 0.4465377546304953 | 0.6471679736763616 | T | T | T |
| 0.4176134234380348 | 0.6713081477811318 | 0.6619117154848096 | T | T | T |
| 0.2990223383216790 | 0.6300341991214782 | 0.8024183525648225 | T | T | T |
| 0.2659320676844713 | 0.6715325036696728 | 0.0236832941249443 | T | T | T |
| 0.1115044745187461 | 0.6717957916780279 | 0.0119545501427479 | T | T | T |
| 0.0605948110233772 | 0.6266856601548000 | 0.8000657526054491 | T | T | T |
| 0.1758030326228911 | 0.6692128491121118 | 0.6652351355452149 | T | T | T |
| 0.0731765410659573 | 0.5540219692332867 | 0.1411071675313726 | T | T | T |
| 0.1948567821737300 | 0.5260969323029761 | 0.2836337151725130 | T | T | T |
| 0.2144692840214027 | 0.5637139828108108 | 0.5062743988895271 | T | T | T |
| 0.3739934125553186 | 0.5660743061057517 | 0.5090219080474009 | T | T | T |
| 0.4281468764955969 | 0.5268811452779555 | 0.2990956543668403 | T | T | T |
| 0.3215317216229482 | 0.5529894883831785 | 0.1459254394601251 | T | T | T |

**Structure files (CONTCAR) involved in this work:**

|                    |                    |                    |   |   |   |
|--------------------|--------------------|--------------------|---|---|---|
| 0.0803490740107373 | 0.3232141618090562 | 0.1630519480932879 | T | T | T |
| 0.1975539774955523 | 0.3680076273035288 | 0.3021484549042937 | T | T | T |
| 0.2326909761529153 | 0.3291200575340615 | 0.5214804332984689 | T | T | T |
| 0.3874613037416178 | 0.3262568080220889 | 0.5100025699227445 | T | T | T |
| 0.4360692958242571 | 0.3694679563738522 | 0.2970376547186878 | T | T | T |
| 0.3194298972180361 | 0.3270974487611949 | 0.1671415864771354 | T | T | T |
| 0.3562803679637444 | 0.0589838273993591 | 0.7089277443001591 | T | T | T |
| 0.3005203400162442 | 0.0689747366753764 | 0.8858385237672866 | T | T | T |
| 0.1998122344278268 | 0.0514613079010201 | 0.0147747366088054 | T | T | T |
| 0.1001530030829642 | 0.0726859388865954 | 0.8851926859866263 | T | T | T |
| 0.1050431739331023 | 0.0546666775894344 | 0.6861597936697842 | T | T | T |
| 0.2289987224347975 | 0.0280977246425611 | 0.7305939723613699 | T | T | T |
| 0.3563144826876167 | 0.8292282283997244 | 0.7365095071895542 | T | T | T |
| 0.2998016029868282 | 0.8372518534162858 | 0.9134011492320614 | T | T | T |
| 0.1886837920961120 | 0.8517043134404931 | 0.0206603258819585 | T | T | T |
| 0.0853898647431549 | 0.8321730784793377 | 0.9017626285634270 | T | T | T |
| 0.0977269564789254 | 0.8409450816437496 | 0.7066990037985128 | T | T | T |
| 0.2263310552253337 | 0.8579762801562932 | 0.7518814392037625 | T | T | T |
| 0.3192500690894303 | 0.9474429155005285 | 0.8066035732152272 | T | T | T |
| 0.0863871899443877 | 0.9524649782855727 | 0.8132022995339945 | T | T | T |
| 0.4301973555811449 | 0.1234853735616912 | 0.5747193986077385 | T | T | T |
| 0.4140851112698172 | 0.9919894205150144 | 0.5586575423111889 | T | T | T |
| 0.4020165535886759 | 0.8588379971418041 | 0.5549039619137387 | T | T | T |
| 0.1980653924467443 | 0.1285787403534432 | 0.6056838271776485 | T | T | T |
| 0.1832769974495267 | 1.0014487709513944 | 0.5475820280329948 | T | T | T |
| 0.1854129596560521 | 0.8671205329684322 | 0.5623298538991899 | T | T | T |
| 0.9922780997180253 | 0.0463934676349900 | 0.7726374054313169 | T | T | T |
| 0.9813454569923439 | 0.8752898819661777 | 0.7992185204702601 | T | T | T |
| 0.1411625097629318 | 0.9425560389463108 | 0.2119405108627477 | T | T | T |
| 0.1991452511358187 | 0.9260533944776296 | 0.3873399315797111 | T | T | T |
| 0.2965046370583291 | 0.9362019997709446 | 0.5240833537191351 | T | T | T |
| 0.3936163242790309 | 0.9274202189352098 | 0.3876843292998442 | T | T | T |
| 0.3956550432318540 | 0.9481555457452263 | 0.1912073497864120 | T | T | T |
| 0.2692906812934509 | 0.9698672928420911 | 0.2316466573117771 | T | T | T |
| 0.1382456961076549 | 0.1647860380833492 | 0.2389644976114609 | T | T | T |
| 0.1938234483753085 | 0.1641642521805068 | 0.4135121455925448 | T | T | T |
| 0.3094853902574741 | 0.1486059443556255 | 0.5049651653829256 | T | T | T |
| 0.4145087844212529 | 0.1727229494260839 | 0.3908791906142940 | T | T | T |
| 0.3937252778629184 | 0.1527995712899099 | 0.1972319865882695 | T | T | T |
| 0.2682536771486778 | 0.1388399144990074 | 0.2523067454576547 | T | T | T |
| 0.1796851088841925 | 0.0492317302993105 | 0.3157834877686600 | T | T | T |
| 0.4167998009002480 | 0.0488547213349109 | 0.3193020433071392 | T | T | T |
| 0.0657186640102649 | 0.8716384196383371 | 0.0897165447003542 | T | T | T |
| 0.0813700684434617 | 0.0009758695382916 | 0.0529266593674449 | T | T | T |
| 0.0980838127678431 | 0.1332292627832861 | 0.0562536011377660 | T | T | T |
| 0.3057594372841677 | 0.8713663489682453 | 0.1061612648693117 | T | T | T |
| 0.3177572179898561 | 0.9989610761052660 | 0.0510767711537338 | T | T | T |
| 0.3010541481716584 | 0.1325680503638978 | 0.0581735346018800 | T | T | T |
| 0.5072604036842366 | 0.9518763974708997 | 0.2863505212908758 | T | T | T |
| 0.5140258433416606 | 0.1341600469380479 | 0.2734629406358338 | T | T | T |
| 0.6344807652682956 | 0.5680596581897742 | 0.2745641758320022 | T | T | T |
| 0.6901151705598939 | 0.5446009295300489 | 0.1004887447338667 | T | T | T |
| 0.7955068625431704 | 0.5460261155849986 | 0.9747783861150608 | T | T | T |

**Structure files (CONTCAR) involved in this work:**

|                    |                    |                     |   |   |   |
|--------------------|--------------------|---------------------|---|---|---|
| 0.8907195553077881 | 0.5556482947427034 | 0.1116317587149996  | T | T | T |
| 0.8953244565866811 | 0.5457196357367986 | 0.3079960811513031  | T | T | T |
| 0.7666566738521331 | 0.5653499398774691 | 0.2607276793940552  | T | T | T |
| 0.6433614595728844 | 0.3311300290304015 | 0.2540183313668044  | T | T | T |
| 0.7062097979004089 | 0.3677975492326017 | 0.0921892078716718  | T | T | T |
| 0.8103997258845015 | 0.3428840317289791 | 0.9798809817531896  | T | T | T |
| 0.9081156043023120 | 0.3210207407263271 | 0.1135628062064392  | T | T | T |
| 0.9018159065038670 | 0.3344490418258085 | 0.3108655547696267  | T | T | T |
| 0.7755473222673480 | 0.3458673128777321 | 0.2568538384595240  | T | T | T |
| 0.6974747903425936 | 0.4526749720676911 | 0.2447482307505660  | T | T | T |
| 0.9163781037758045 | 0.4405702080257854 | 0.1929746423375794  | T | T | T |
| 0.5615890963370737 | 0.6247335983300640 | 0.4196376411237170  | T | T | T |
| 0.5925081005384364 | 0.4948519441416305 | 0.4296610332981138  | T | T | T |
| 0.5984660522751863 | 0.3613137212015987 | 0.4346731341092676  | T | T | T |
| 0.8265709500658396 | 0.6381031417813154 | 0.4020312474917307  | T | T | T |
| 0.7991041323370898 | 0.5082862071351794 | 0.4337020323833853  | T | T | T |
| 0.8122427434090703 | 0.3746043917845702 | 0.4444471251702476  | T | T | T |
| 0.0068574056863290 | 0.5410502183505963 | 0.2089563700045425  | T | T | T |
| 0.0168399725513359 | 0.3574208225643634 | 0.2196405522501280  | T | T | T |
| 0.8599828595347969 | 0.4293931611102318 | 0.7905754648393548  | T | T | T |
| 0.8143195986527959 | 0.4486338593325382 | 0.6066291775360317  | T | T | T |
| 0.7004502796587654 | 0.4341863547583752 | 0.5023512051632022  | T | T | T |
| 0.5865787011755085 | 0.4271963468973374 | 0.6006765885695835  | T | T | T |
| 0.6004022932441425 | 0.4304502837389024 | 0.7975199046776708  | T | T | T |
| 0.7290731486206741 | 0.4379608734423807 | 0.7528378058339711  | T | T | T |
| 0.8410241635441631 | 0.6718786349581655 | 0.7829876832769183  | T | T | T |
| 0.8032659914906306 | 0.6313497812963719 | 0.6001080115625725  | T | T | T |
| 0.6869345202068691 | 0.6409152718887549 | 0.4734602178030869  | T | T | T |
| 0.5881485281180362 | 0.6636495566778264 | 0.6055610803156896  | T | T | T |
| 0.5909504169152374 | 0.6540431012023475 | 0.8041682921696048  | T | T | T |
| 0.7154351865559548 | 0.6421086194386955 | 0.7473270337582204  | T | T | T |
| 0.8068137124714003 | 0.5455747697878836 | 0.7486798918900871  | T | T | T |
| 0.5824309746737345 | 0.5439040597033710 | 0.6940977770249041  | T | T | T |
| 0.9330736617926557 | 0.3830800022150672 | 0.9410273468807313  | T | T | T |
| 0.9174635270661403 | 0.5141510003586622 | 0.9249519641118082  | T | T | T |
| 0.8954751124804453 | 0.6418044186170002 | 0.9682954683772658  | T | T | T |
| 0.6890131388691774 | 0.3602593488412003 | 0.9000653361944208  | T | T | T |
| 0.6807446520726003 | 0.4945246528582521 | 0.9195133684134068  | T | T | T |
| 0.6869630118757148 | 0.6255211840955095 | 0.9431035215541000  | T | T | T |
| 0.4833464759448019 | 0.4553948889203749 | 0.7180093961851776  | T | T | T |
| 0.4793306952558464 | 0.6279780368803042 | 0.7081491852876254  | T | T | T |
| 0.6361951862361193 | 0.9297852215857753 | 0.2685528127852251  | T | T | T |
| 0.6802169630148042 | 0.9564239935793709 | 0.0848509084388377  | T | T | T |
| 0.7988700429204764 | 0.9721961329561198 | -0.0008602783909552 | T | T | T |
| 0.9125137973062996 | 0.9367272496956250 | 0.0873013002712568  | T | T | T |
| 0.8932774476003816 | 0.9295605744329725 | 0.2834873120062594  | T | T | T |
| 0.7667605738233149 | 0.9374634783602742 | 0.2297461243345212  | T | T | T |
| 0.6366540373051971 | 0.1690844489592387 | 0.2299669173737361  | T | T | T |
| 0.7113226640506963 | 0.1272376762091777 | 0.0785050630235170  | T | T | T |
| 0.8113798111649690 | 0.1586847961326142 | 0.9578626163659789  | T | T | T |
| 0.9083958148884275 | 0.1612749832999563 | 0.0918036369990516  | T | T | T |
| 0.8956177670737275 | 0.1645685839074914 | 0.2901088535237774  | T | T | T |
| 0.7673183983615205 | 0.1572087590425044 | 0.2514786775010762  | T | T | T |

**Structure files (CONTCAR) involved in this work:**

|                    |                     |                    |   |   |   |
|--------------------|---------------------|--------------------|---|---|---|
| 0.6914148465020843 | 0.0474580328314122  | 0.2326819648027998 | T | T | T |
| 0.9093556635210954 | 0.0483420239080488  | 0.1955749320248903 | T | T | T |
| 0.5656809379175586 | 0.8706540719765482  | 0.4147041985074401 | T | T | T |
| 0.5879636366012769 | 0.0016221213386860  | 0.4221911534146534 | T | T | T |
| 0.6080309908637400 | 0.1337435674583664  | 0.4172918955810148 | T | T | T |
| 0.8040046267633418 | 0.8578091912531270  | 0.3798284004937323 | T | T | T |
| 0.8064224031349962 | 0.9915410941233752  | 0.4014666470805513 | T | T | T |
| 0.8114228920016782 | 0.1222475378362203  | 0.4332336392862551 | T | T | T |
| 0.0113665629651460 | 0.9612650269333705  | 0.2116347283492754 | T | T | T |
| 0.0118277720939603 | 0.1328081270892675  | 0.2090369682288215 | T | T | T |
| 0.8619591331716161 | 0.0676435740911365  | 0.7632478593107526 | T | T | T |
| 0.8152262333035972 | 0.0392018316564103  | 0.5853677202907905 | T | T | T |
| 0.7026814166135941 | 0.0526740170067460  | 0.4844988063683429 | T | T | T |
| 0.5911811327733156 | 0.0725446374720997  | 0.5883797174677232 | T | T | T |
| 0.6034433724458571 | 0.0681743965408906  | 0.7842567548765864 | T | T | T |
| 0.7315668658397033 | 0.0638894787915874  | 0.7350141777436664 | T | T | T |
| 0.8652068017873348 | 0.8345890415840328  | 0.7348398969063120 | T | T | T |
| 0.8014628081938744 | 0.8754285913917208  | 0.5732557305658414 | T | T | T |
| 0.6879250711342899 | 0.8539814308322354  | 0.4771953059953369 | T | T | T |
| 0.5871264206361313 | 0.8321633671755911  | 0.6046405380401436 | T | T | T |
| 0.5997512199117857 | 0.8515124350603808  | 0.8031736857354561 | T | T | T |
| 0.7326690612446390 | 0.8341990123268695  | 0.7329650347020537 | T | T | T |
| 0.8020240139471672 | 0.9505480457183064  | 0.7360876011912997 | T | T | T |
| 0.5828502192255948 | 0.9544549802503389  | 0.6789610202092562 | T | T | T |
| 0.9348118008808659 | 0.1292403198545638  | 0.9016551504118270 | T | T | T |
| 0.9170422866087810 | -0.0009583524111916 | 0.9145115865668488 | T | T | T |
| 0.8735880593665550 | 0.8727283985157188  | 0.9263355383839187 | T | T | T |
| 0.6900970665061531 | 0.1411055774172282  | 0.8858479205159617 | T | T | T |
| 0.6878016198452722 | 0.0070225761022620  | 0.9031682049915101 | T | T | T |
| 0.7191382267544503 | 0.8775341960040878  | 0.9313978261843736 | T | T | T |
| 0.4867603717392131 | 0.0445109034269364  | 0.7062486226057033 | T | T | T |
| 0.4826869246641671 | 0.8674995784842775  | 0.7133062584714920 | T | T | T |
| 0.3528035061431731 | 0.4386051915896444  | 0.7141671346007489 | T | T | T |
| 0.2959224972135344 | 0.4296672464968525  | 0.8905408376717883 | T | T | T |
| 0.2003687994087349 | 0.4438270256817476  | 0.0293006720529592 | T | T | T |
| 0.1051429169609854 | 0.4282774156588565  | 0.8908818688766584 | T | T | T |
| 0.1010477344523070 | 0.4431424970768814  | 0.6937317470817930 | T | T | T |
| 0.2257544656348798 | 0.4722227069922494  | 0.7348467723805249 | T | T | T |
| 0.3557748900070549 | 0.6695003845137348  | 0.7398802155812297 | T | T | T |
| 0.2971037449774474 | 0.6626170313172611  | 0.9130122714517008 | T | T | T |
| 0.1883896233279177 | 0.6463439840639561  | 0.0245001561747413 | T | T | T |
| 0.0897728214937799 | 0.6687697582111163  | 0.8961088350098867 | T | T | T |
| 0.0995409183599120 | 0.6546661382972322  | 0.7005319395353800 | T | T | T |
| 0.2266754963226517 | 0.6389397083034216  | 0.7490831563833085 | T | T | T |
| 0.3184139850659561 | 0.5507855909214189  | 0.8106239958407693 | T | T | T |
| 0.0810664795499829 | 0.5479340726478542  | 0.8162858180906558 | T | T | T |
| 0.4299079642050926 | 0.3745222138031005  | 0.5840948782289215 | T | T | T |
| 0.4140063974782529 | 0.5061854000317136  | 0.5663717157853397 | T | T | T |
| 0.3943665383658753 | 0.6385832756667571  | 0.5558158146525102 | T | T | T |
| 0.1970766275741430 | 0.3723713540128828  | 0.6087938254823754 | T | T | T |
| 0.1762097573822240 | 0.4992334669000243  | 0.5542852233609363 | T | T | T |
| 0.1899739314535591 | 0.6334063763151923  | 0.5577575590126432 | T | T | T |
| 0.9903024239888095 | 0.4496417248323616  | 0.7929321007237063 | T | T | T |

**Structure files (CONTCAR) involved in this work:**

|                    |                    |                    |   |   |   |
|--------------------|--------------------|--------------------|---|---|---|
| 0.9817442467871302 | 0.6363867103756354 | 0.7900731363042609 | T | T | T |
| 0.1373690709209057 | 0.5593093776881487 | 0.2139922884260082 | T | T | T |
| 0.1959365266056652 | 0.5670354148206156 | 0.3883925460632308 | T | T | T |
| 0.2943383329359847 | 0.5533038274105280 | 0.5227102236862369 | T | T | T |
| 0.3938411867734240 | 0.5667375903204133 | 0.3917779346485083 | T | T | T |
| 0.3955669263600791 | 0.5527934478784786 | 0.1949638992109880 | T | T | T |
| 0.2673543068518348 | 0.5325363830451429 | 0.2310418404943824 | T | T | T |
| 0.1441673632731051 | 0.3252271912875551 | 0.2371604919687609 | T | T | T |
| 0.1946073773934193 | 0.3406398554780348 | 0.4158336910856423 | T | T | T |
| 0.3102498584472637 | 0.3522737628545927 | 0.5090290745977896 | T | T | T |
| 0.4172522545972749 | 0.3281276266188392 | 0.3975396089058444 | T | T | T |
| 0.3967631575610342 | 0.3380257595736480 | 0.2012411953392156 | T | T | T |
| 0.2718586450709468 | 0.3573695350181928 | 0.2554771672198189 | T | T | T |
| 0.1775829726077077 | 0.4471373143769129 | 0.3008467205827209 | T | T | T |
| 0.4140184536499130 | 0.4470460689894367 | 0.3134228795106021 | T | T | T |
| 0.0635973691478200 | 0.6249852642481035 | 0.0820022106640737 | T | T | T |
| 0.0800687945216563 | 0.4936507696791085 | 0.0602008599840564 | T | T | T |
| 0.0973452537204283 | 0.3617129601414767 | 0.0592847095294876 | T | T | T |
| 0.3075965120488613 | 0.6280337671815925 | 0.1043281421003861 | T | T | T |
| 0.3189984674159118 | 0.4989471615549942 | 0.0548476364883839 | T | T | T |
| 0.3053450706353754 | 0.3651863212603600 | 0.0618258639879753 | T | T | T |
| 0.5076254836418269 | 0.5402130999920642 | 0.2924691812701125 | T | T | T |
| 0.5160062475694938 | 0.3632604105089564 | 0.2768323690374962 | T | T | T |
| 0.4406076111011915 | 0.7483611253727712 | 0.6441436798703049 | T | T | T |
| 0.1879284007904062 | 0.7492793899678770 | 0.6508874251503608 | T | T | T |
| 0.2708759701419990 | 0.7496268097761913 | 0.0567687980957385 | T | T | T |
| 0.1037715060567874 | 0.7487074786671880 | 0.0522476464920155 | T | T | T |
| 0.0610488476379990 | 0.2465660471919081 | 0.1353142186979196 | T | T | T |
| 0.3043876982049870 | 0.2479869710720685 | 0.1507583982264573 | T | T | T |
| 0.2285107831165475 | 0.2508757684948082 | 0.5541645876250741 | T | T | T |
| 0.3924942595656672 | 0.2492500615029050 | 0.5495319235307573 | T | T | T |
| 0.5629040931403063 | 0.2477921356508896 | 0.3478284189627787 | T | T | T |
| 0.8122718346436115 | 0.2485176330135890 | 0.3818256208687157 | T | T | T |
| 0.7158659682215495 | 0.2488605101605577 | 0.9985709497898543 | T | T | T |
| 0.9060450430405198 | 0.2527781905688393 | 0.9468900153574639 | T | T | T |
| 0.9318889697086704 | 0.7610957329092983 | 0.8726029558707885 | T | T | T |
| 0.6793721276841046 | 0.7427841838924566 | 0.8801262951944431 | T | T | T |
| 0.6058346770740722 | 0.7477591196428612 | 0.4559189248297612 | T | T | T |
| 0.7754481152753003 | 0.6665696242188954 | 0.0916429040583840 | T | T | T |
| 0.7309053920125373 | 0.7852014909845513 | 0.0790474733658979 | T | T | T |
| 0.8689057341452135 | 0.7957228632135106 | 0.1208731655052078 | T | T | T |
| 0.7768075444270043 | 0.7542426361592451 | 0.4945253351423793 | T | T | T |
| 0.9153462039359102 | 0.6769743724521731 | 0.8462193330182839 | T | T | T |
| 0.6798854022656901 | 0.8282313230788745 | 0.8349472236591338 | T | T | T |
| 0.7657861600948035 | 0.6695227955238950 | 0.5005994231419669 | T | T | T |
| 0.7180635303792636 | 0.7094802433838848 | 0.0154009682853719 | T | T | T |
| 0.7964670061055394 | 0.8270229945608689 | 0.0081057638572996 | T | T | T |
| 0.8591735212161119 | 0.7063300674893184 | 0.0670271974999197 | T | T | T |
| 0.9299920528573191 | 0.7785908311049217 | 0.1003710574437188 | T | T | T |
| 0.8907539114238706 | 0.6740748507681678 | 0.4162344954553279 | T | T | T |
| 0.9535659016534888 | 0.7940035570020201 | 0.0302142328842273 | T | T | T |
| 0.9613359367736845 | 0.7600411436035207 | 0.1621818551275373 | T | T | T |
| 0.8912595033169647 | 0.6707453902496225 | 0.2219547641735423 | T | T | T |

**Structure files (CONTCAR) involved in this work:**

|                    |                    |                    |   |   |   |
|--------------------|--------------------|--------------------|---|---|---|
| 0.8843443916593021 | 0.7244084876109920 | 0.3845744670154735 | T | T | T |
| 0.9006019577822472 | 0.6767097295704334 | 0.4967402594708876 | T | T | T |
| 0.9303366989977114 | 0.6461518548350338 | 0.3782984983319315 | T | T | T |
| 0.8538734814224840 | 0.6767310933712296 | 0.2189557242544931 | T | T | T |

**Figure 4(b) Route(b-i)-Cu ③**

Si O Al Cu C H

1.0000000000000000

20.0219993591000005 0.0000000000000000 0.0000000000000000

0.0000000000000000 19.8990001678000006 0.0000000000000000

0.0000000000000000 0.0000000000000000 13.3830003737999998

93 195 3 3 2 7

Selective dynamics

Direct

|                    |                    |                    |   |   |   |
|--------------------|--------------------|--------------------|---|---|---|
| 0.4218810154674882 | 0.0530630867885262 | 0.6392992292675597 | T | T | T |
| 0.3016707852526536 | 0.0249112695757572 | 0.7837850688551905 | T | T | T |
| 0.2810858695628370 | 0.0629763040811560 | 0.0035291874728230 | T | T | T |
| 0.1219798504263162 | 0.0638761079509459 | 0.0039144927598909 | T | T | T |
| 0.0706921769157205 | 0.0254517392878039 | 0.7943830315643926 | T | T | T |
| 0.1781618042083158 | 0.0501365568928884 | 0.6429817657964665 | T | T | T |
| 0.4237963064486335 | 0.8255199838934638 | 0.6642495320437326 | T | T | T |
| 0.3030974911593799 | 0.8677279973189153 | 0.8020644649570727 | T | T | T |
| 0.2696051809054640 | 0.8264782207153292 | 0.0238287447290451 | T | T | T |
| 0.1151411770630510 | 0.8239326878859307 | 0.0145773627273685 | T | T | T |
| 0.0669142571636613 | 0.8678797456931906 | 0.8022025123060529 | T | T | T |
| 0.1802740410616612 | 0.8266517451416270 | 0.6651509027400124 | T | T | T |
| 0.0755398223626459 | 0.9429165293085257 | 0.1407098783943699 | T | T | T |
| 0.1971923200701655 | 0.9703874795634205 | 0.2849083553158388 | T | T | T |
| 0.2188687301134542 | 0.9317360578167106 | 0.5050534833119200 | T | T | T |
| 0.3782914380761125 | 0.9281003341287396 | 0.5085275957027408 | T | T | T |
| 0.4289817580183023 | 0.9695394883983384 | 0.3004184566906447 | T | T | T |
| 0.3230048818903760 | 0.9467113135022844 | 0.1437320889209479 | T | T | T |
| 0.0779639883760596 | 0.1682617895720021 | 0.1597001529949425 | T | T | T |
| 0.1958020931024729 | 0.1275710208501410 | 0.3036401864344318 | T | T | T |
| 0.2300233722022075 | 0.1706281567223689 | 0.5211338036378896 | T | T | T |
| 0.3846247345628224 | 0.1720912018976960 | 0.5080020924092180 | T | T | T |
| 0.4337010260309820 | 0.1262280442055011 | 0.2993456462835542 | T | T | T |
| 0.3180506666327518 | 0.1674461850136418 | 0.1660315919533012 | T | T | T |
| 0.5759685700856974 | 0.5550148492012653 | 0.3589639662122363 | T | T | T |
| 0.6956751011213510 | 0.5268888250957942 | 0.2214728808652046 | T | T | T |
| 0.7114975360564275 | 0.5470964203724872 | 0.9908212255041359 | T | T | T |
| 0.8702525092760564 | 0.5681164733875987 | 0.9971377940858263 | T | T | T |
| 0.9291909227581603 | 0.5246614052651370 | 0.2034438007584565 | T | T | T |
| 0.8187986125757656 | 0.5617000280753741 | 0.3464763899600743 | T | T | T |
| 0.5798441712423043 | 0.3243270337497730 | 0.3306917153593844 | T | T | T |
| 0.7042505230371500 | 0.3697249677503811 | 0.2160029384956291 | T | T | T |
| 0.7311715359191112 | 0.3267455521880180 | 0.9944586763739313 | T | T | T |
| 0.8881841132847644 | 0.3284200950902098 | 0.9971977377405027 | T | T | T |
| 0.9344462368803074 | 0.3681161793461150 | 0.2070327822827890 | T | T | T |
| 0.8266626384781200 | 0.3269733089095094 | 0.3547262288533106 | T | T | T |
| 0.9235449433916075 | 0.4479096061979127 | 0.8648276809618696 | T | T | T |
| 0.8031833585100534 | 0.4654445643913887 | 0.7249117203658302 | T | T | T |
| 0.7814355734094492 | 0.4410035651813091 | 0.4985071249201715 | T | T | T |

**Structure files (CONTCAR) involved in this work:**

|                    |                    |                    |   |   |   |
|--------------------|--------------------|--------------------|---|---|---|
| 0.6214804533566231 | 0.4285478414242153 | 0.4934097683491594 | T | T | T |
| 0.5633366995695244 | 0.4614891801871489 | 0.7032069069705147 | T | T | T |
| 0.6762477903477525 | 0.4263038497731532 | 0.8423435725587354 | T | T | T |
| 0.7928328286491775 | 0.6208483276001371 | 0.7125089447363806 | T | T | T |
| 0.6088101640094332 | 0.6712886613455462 | 0.4899441476556855 | T | T | T |
| 0.5618813081146186 | 0.6193637692641101 | 0.7026734081422514 | T | T | T |
| 0.6676163240795358 | 0.6655604341853847 | 0.8442104559973872 | T | T | T |
| 0.5752868999601513 | 0.9409436837609755 | 0.3550042327685127 | T | T | T |
| 0.6947245950368881 | 0.9711403981801824 | 0.2145503023299699 | T | T | T |
| 0.7169385382854535 | 0.9517762313553702 | 0.9873794190435985 | T | T | T |
| 0.8740355596105314 | 0.9489517592411396 | 0.9816465203028019 | T | T | T |
| 0.9291606270806912 | 0.9660527722959452 | 0.1942409737747191 | T | T | T |
| 0.8172875070874264 | 0.9285578988273258 | 0.3346532511396608 | T | T | T |
| 0.5802900031371611 | 0.1699887352872233 | 0.3226203876968128 | T | T | T |
| 0.7040987481094607 | 0.1274075345561733 | 0.2071797337285308 | T | T | T |
| 0.7356827447496057 | 0.1679858416843742 | 0.9868702545339550 | T | T | T |
| 0.8931218695789024 | 0.1784951072559957 | 0.9760318346752980 | T | T | T |
| 0.9333843442382584 | 0.1238168914644511 | 0.1930976222596376 | T | T | T |
| 0.8257849761670187 | 0.1719415155827141 | 0.3439161104246880 | T | T | T |
| 0.9264827676861672 | 0.0632878297619987 | 0.8461193141632696 | T | T | T |
| 0.8033858421484812 | 0.0285485578830881 | 0.7108948415533346 | T | T | T |
| 0.7845591935240445 | 0.0520496021803034 | 0.4830447248111664 | T | T | T |
| 0.6242917640509481 | 0.0664094006387417 | 0.4845942107987644 | T | T | T |
| 0.5666946330523676 | 0.0355193063287260 | 0.6949415445993661 | T | T | T |
| 0.6785893949483236 | 0.0665943958497025 | 0.8342347529279409 | T | T | T |
| 0.9144449351847320 | 0.8336862300802952 | 0.8280619898003270 | T | T | T |
| 0.7972489620293512 | 0.8715668857049987 | 0.7021864486695545 | T | T | T |
| 0.7676411136772262 | 0.8274779942705380 | 0.4878974329911756 | T | T | T |
| 0.6101834021472852 | 0.8239745649492649 | 0.4917558203407775 | T | T | T |
| 0.5674185309475858 | 0.8768019689949119 | 0.7065001943078050 | T | T | T |
| 0.4194430369024352 | 0.4425402822481483 | 0.6471378019561197 | T | T | T |
| 0.2989031626970194 | 0.4713874086789064 | 0.7888603893371772 | T | T | T |
| 0.2804614346576443 | 0.4335528289426777 | 0.0108164441655354 | T | T | T |
| 0.1218542022778126 | 0.4308572160443501 | 0.0106658719645388 | T | T | T |
| 0.0703407193635993 | 0.4701370939601656 | 0.8017909613637829 | T | T | T |
| 0.1754661075745644 | 0.4453189380180405 | 0.6485269257236156 | T | T | T |
| 0.4195448227664066 | 0.6701056280327351 | 0.6645790549616123 | T | T | T |
| 0.3014207677834090 | 0.6282826534211274 | 0.8047677641623374 | T | T | T |
| 0.2699709453871738 | 0.6701290899670556 | 0.0277476078857778 | T | T | T |
| 0.1165370303916138 | 0.6709070062243492 | 0.0158278694865589 | T | T | T |
| 0.0658283354149097 | 0.6288612951560095 | 0.8040911178510378 | T | T | T |
| 0.1793592675049205 | 0.6681134318601141 | 0.6660284080781734 | T | T | T |
| 0.0743299696454198 | 0.5530555029616733 | 0.1425110842936254 | T | T | T |
| 0.1960441764060340 | 0.5252215778354261 | 0.2844381415425377 | T | T | T |
| 0.2162082239846983 | 0.5616640336033339 | 0.5068806271546428 | T | T | T |
| 0.3758235434839308 | 0.5652112979546133 | 0.5108731118457758 | T | T | T |
| 0.4303574287804738 | 0.5248737357376329 | 0.3025402303500257 | T | T | T |
| 0.3237975629380616 | 0.5513538521006430 | 0.1481121595188728 | T | T | T |
| 0.0786950181225456 | 0.3231827646692992 | 0.1633038676176686 | T | T | T |
| 0.1962481096819124 | 0.3669440455901162 | 0.3036677536891301 | T | T | T |
| 0.2302509278064703 | 0.3272206982175146 | 0.5236094185945978 | T | T | T |
| 0.3852564473410402 | 0.3243915577040238 | 0.5127406575260669 | T | T | T |
| 0.4352399629192342 | 0.3681541376831404 | 0.3017617515403603 | T | T | T |



**Structure files (CONTCAR) involved in this work:**

|                    |                     |                    |   |   |   |
|--------------------|---------------------|--------------------|---|---|---|
| 0.3193633995057881 | 0.3264843767866643  | 0.1692220143347063 | T | T | T |
| 0.3559325360483803 | 0.0579024515262331  | 0.7090320051737508 | T | T | T |
| 0.2998175414147695 | 0.0690427398820712  | 0.8860110537282373 | T | T | T |
| 0.2012769306065732 | 0.0507560324032599  | 0.0187083424091089 | T | T | T |
| 0.1025953804050524 | 0.0680356303463856  | 0.8865820631161583 | T | T | T |
| 0.1031611067668805 | 0.0480435945694725  | 0.6887275535894223 | T | T | T |
| 0.2287303771568616 | 0.0267145159496154  | 0.7312411619722632 | T | T | T |
| 0.3608550776660867 | 0.8292280261266315  | 0.7405916753540478 | T | T | T |
| 0.3006888843119824 | 0.8356608090673423  | 0.9131695528236142 | T | T | T |
| 0.1915899003377434 | 0.8505350299550889  | 0.0243735733265526 | T | T | T |
| 0.0925273855488928 | 0.8256154236579133  | 0.8987021055494921 | T | T | T |
| 0.1037421655963112 | 0.8387359914141614  | 0.7029435548940908 | T | T | T |
| 0.2307235898127273 | 0.8576918225461784  | 0.7487568784083326 | T | T | T |
| 0.3205212547327410 | 0.9473842252227626  | 0.8091854144495602 | T | T | T |
| 0.0852331511162928 | 0.9466736354554489  | 0.8176252254837019 | T | T | T |
| 0.4297432110599619 | 0.1218861956843628  | 0.5750061873336338 | T | T | T |
| 0.4176470789976672 | 0.9897186037688187  | 0.5625692155407542 | T | T | T |
| 0.4018543655814507 | 0.8571953570259625  | 0.5567379724754998 | T | T | T |
| 0.1934866188632968 | 0.1262338847747046  | 0.6065534141137882 | T | T | T |
| 0.1825903314088352 | -0.0012423085219397 | 0.5488047373282924 | T | T | T |
| 0.1908433289517894 | 0.8641000054142934  | 0.5584090055857278 | T | T | T |
| 0.9913433416191205 | 0.0401868497613381  | 0.7831758251219270 | T | T | T |
| 0.9870492071545516 | 0.8603736944176393  | 0.7913048844627482 | T | T | T |
| 0.1391326629922816 | 0.9386448096663150  | 0.2147366628091746 | T | T | T |
| 0.2019983899282799 | 0.9261913263885092  | 0.3865998142508574 | T | T | T |
| 0.2985690511053103 | 0.9388492452109156  | 0.5252540897005837 | T | T | T |
| 0.3950186522890769 | 0.9261779904122504  | 0.3900066400353923 | T | T | T |
| 0.3965290503544504 | 0.9488778761237072  | 0.1937700727479363 | T | T | T |
| 0.2681442565800311 | 0.9682534874353512  | 0.2271593634671495 | T | T | T |
| 0.1392632389101471 | 0.1649501239337647  | 0.2378823978909229 | T | T | T |
| 0.1933968333292674 | 0.1606539225957792  | 0.4139774093517322 | T | T | T |
| 0.3073711022325567 | 0.1463750030230482  | 0.5108289897976059 | T | T | T |
| 0.4110041751705636 | 0.1726062442660006  | 0.3933038121731855 | T | T | T |
| 0.3948338399596051 | 0.1518706414762318  | 0.1992800002725812 | T | T | T |
| 0.2689532680650739 | 0.1381204595559035  | 0.2530570138841722 | T | T | T |
| 0.1789400185397028 | 0.0478980097959466  | 0.3110273539944898 | T | T | T |
| 0.4148819146111632 | 0.0485919555365922  | 0.3238067767625513 | T | T | T |
| 0.0666879051684731 | 0.8714089881253427  | 0.0823434346478197 | T | T | T |
| 0.0821043504286078 | 0.0025692888382384  | 0.0583815349414483 | T | T | T |
| 0.0998717579308194 | 0.1346904462559567  | 0.0539924591848372 | T | T | T |
| 0.3102254118337717 | 0.8708003821184249  | 0.1046497460865813 | T | T | T |
| 0.3204377635045524 | 0.9988540287216390  | 0.0503329468347283 | T | T | T |
| 0.3027491678370948 | 0.1321007425530208  | 0.0590638588886308 | T | T | T |
| 0.5080657376525166 | 0.9544388340610670  | 0.2907401874254647 | T | T | T |
| 0.5137239753447349 | 0.1322162466778590  | 0.2813513074538348 | T | T | T |
| 0.6375086046853057 | 0.5667126178740923  | 0.2808705009000711 | T | T | T |
| 0.6825173521472023 | 0.5388116923381973  | 0.1023866696102118 | T | T | T |
| 0.7919581398330349 | 0.5479705814546756  | 0.9890701744814273 | T | T | T |
| 0.8954769769687395 | 0.5668114682556140  | 0.1118752567229796 | T | T | T |
| 0.8950002912591807 | 0.5469060655718752  | 0.3072080707591158 | T | T | T |
| 0.7693231753182896 | 0.5561743264026655  | 0.2472927827599613 | T | T | T |
| 0.6405071050178847 | 0.3256286641030887  | 0.2503241628971319 | T | T | T |
| 0.7096109572357687 | 0.3656153515166843  | 0.0957612192966107 | T | T | T |

**Structure files (CONTCAR) involved in this work:**

|                    |                    |                    |   |   |   |
|--------------------|--------------------|--------------------|---|---|---|
| 0.8096719426768616 | 0.3430185164150137 | 0.9756015894529375 | T | T | T |
| 0.9032877981997056 | 0.3233879544346113 | 0.1165139974077794 | T | T | T |
| 0.9008632554991722 | 0.3452609681541819 | 0.3119408812974898 | T | T | T |
| 0.7723377863293749 | 0.3415977373919905 | 0.2664161270101509 | T | T | T |
| 0.6920687824025664 | 0.4474154341995901 | 0.2490000003912013 | T | T | T |
| 0.9167417581935343 | 0.4457929654959846 | 0.1811544687886684 | T | T | T |
| 0.5601545572484808 | 0.6219687686097694 | 0.4235122654373312 | T | T | T |
| 0.5931562024897804 | 0.4929793129465356 | 0.4332039599156721 | T | T | T |
| 0.6033084813920226 | 0.3596690524605509 | 0.4340721165470224 | T | T | T |
| 0.8154678029032586 | 0.6360295710513065 | 0.3894074509048114 | T | T | T |
| 0.7982360502169001 | 0.5024644977499533 | 0.4240102064125347 | T | T | T |
| 0.8110951930125476 | 0.3710736588300454 | 0.4533430419397678 | T | T | T |
| 0.0080952740564958 | 0.5428132773350188 | 0.2106516326264264 | T | T | T |
| 0.0149152976282058 | 0.3597719103971168 | 0.2155953165649268 | T | T | T |
| 0.8618332958568845 | 0.4297773558904243 | 0.7911083071971516 | T | T | T |
| 0.8160618421700588 | 0.4521311313049147 | 0.6069840740197245 | T | T | T |
| 0.7011467664918036 | 0.4344298965646798 | 0.5100277737081511 | T | T | T |
| 0.5849985762038973 | 0.4239108962888244 | 0.6010118649786731 | T | T | T |
| 0.6013455084018148 | 0.4263086109115589 | 0.7969671266114434 | T | T | T |
| 0.7312243327098088 | 0.4319711144468907 | 0.7537783145835258 | T | T | T |
| 0.8494166933404185 | 0.6685794456538142 | 0.7576808020358248 | T | T | T |
| 0.7883242623432899 | 0.6191666717723462 | 0.5944950943807716 | T | T | T |
| 0.6847045134978539 | 0.6553548452694822 | 0.4648076501035858 | T | T | T |
| 0.5914939371871771 | 0.6598632539183185 | 0.6086061472799189 | T | T | T |
| 0.5922638978984981 | 0.6510820464404264 | 0.8066766941601325 | T | T | T |
| 0.7202786914129006 | 0.6447104898735901 | 0.7611117957228709 | T | T | T |
| 0.8037290865170702 | 0.5440291807792987 | 0.7554119600238866 | T | T | T |
| 0.5833748038265425 | 0.5406177513169863 | 0.6975221005605271 | T | T | T |
| 0.9322390569487987 | 0.3878188830074386 | 0.9467642328963063 | T | T | T |
| 0.9128134883564790 | 0.5184430982975149 | 0.9258756010249831 | T | T | T |
| 0.8846230574210004 | 0.6463708791843444 | 0.9610352456548621 | T | T | T |
| 0.6869468261500966 | 0.3567471664473840 | 0.9034260128932502 | T | T | T |
| 0.6826173667876736 | 0.4908356300739168 | 0.9172808686472114 | T | T | T |
| 0.6807573051448661 | 0.6213960908058551 | 0.9520096851672892 | T | T | T |
| 0.4834550955029572 | 0.4528396342207276 | 0.7201392285008140 | T | T | T |
| 0.4811977849414057 | 0.6262426606505500 | 0.7096677660576577 | T | T | T |
| 0.6365747766144308 | 0.9328956945442428 | 0.2758458170079628 | T | T | T |
| 0.6814603977709025 | 0.9634603069166596 | 0.0952497693107876 | T | T | T |
| 0.7962322181894889 | 0.9693585727113644 | 0.9958915634455677 | T | T | T |
| 0.9035489713718999 | 0.9272227933417173 | 0.0919855689047432 | T | T | T |
| 0.8928846230027290 | 0.9309434563280817 | 0.2888731675331270 | T | T | T |
| 0.7663064892551644 | 0.9352780886906011 | 0.2387576339746944 | T | T | T |
| 0.6358124528412986 | 0.1677202248429459 | 0.2333437745471658 | T | T | T |
| 0.7173486893302657 | 0.1265855417588097 | 0.0878621634073622 | T | T | T |
| 0.8145166318578403 | 0.1600418138617608 | 0.9603636357018667 | T | T | T |
| 0.9120775488545678 | 0.1624632347642525 | 0.0914808796834263 | T | T | T |
| 0.8974045469014199 | 0.1572226229002364 | 0.2898524808243917 | T | T | T |
| 0.7670930427599597 | 0.1633040304291526 | 0.2609414013422163 | T | T | T |
| 0.6971212716408567 | 0.0500591193626241 | 0.2463196133847205 | T | T | T |
| 0.9104958962623416 | 0.0451694137061901 | 0.1851006159875461 | T | T | T |
| 0.5653726738076310 | 0.8739857644228608 | 0.4219083558616650 | T | T | T |
| 0.5885123913356241 | 0.0040941284631930 | 0.4286173191511876 | T | T | T |
| 0.6102657574099073 | 0.1350753654139925 | 0.4225999337740791 | T | T | T |

**Structure files (CONTCAR) involved in this work:**

|                    |                     |                    |   |   |   |
|--------------------|---------------------|--------------------|---|---|---|
| 0.8073277682317486 | 0.8570814100074950  | 0.3891228434795110 | T | T | T |
| 0.8064602612859795 | 0.9912048558376549  | 0.4096742970794837 | T | T | T |
| 0.8138235141601735 | 0.1219397713474893  | 0.4377254929531775 | T | T | T |
| 0.0087176271370447 | 0.9546470113727984  | 0.2072921375704559 | T | T | T |
| 0.0139800388608232 | 0.1286805205638439  | 0.2070138344123468 | T | T | T |
| 0.8623287754840067 | 0.0659303941337536  | 0.7733538578115232 | T | T | T |
| 0.8167504878226942 | 0.0411612282778405  | 0.5929729383734255 | T | T | T |
| 0.7040297032554766 | 0.0540975575082216  | 0.4924976389764785 | T | T | T |
| 0.5919562646529585 | 0.0743378428902839  | 0.5947556286232211 | T | T | T |
| 0.6033691828004850 | 0.0702033273513321  | 0.7905506621520433 | T | T | T |
| 0.7318331491869930 | 0.0612953455699464  | 0.7426320304079674 | T | T | T |
| 0.8676372967021228 | 0.8337548648478740  | 0.7294185781508981 | T | T | T |
| 0.7885486987709450 | 0.8756526254195168  | 0.5819001725296593 | T | T | T |
| 0.6879802957396086 | 0.8390414486165365  | 0.4659787032070054 | T | T | T |
| 0.5960743431562416 | 0.8359844204863627  | 0.6098784120024023 | T | T | T |
| 0.6003162026348100 | 0.8514180521057397  | 0.8092642249845617 | T | T | T |
| 0.7368576316044094 | 0.8345845831990558  | 0.7577062114915746 | T | T | T |
| 0.8040685289906326 | 0.9497782903751271  | 0.7411021839736406 | T | T | T |
| 0.5844118811271279 | 0.9562928644958978  | 0.6873848646571145 | T | T | T |
| 0.9384146073990685 | 0.1363125428195565  | 0.8972400168438394 | T | T | T |
| 0.9161455902229735 | 0.0117960568607175  | 0.9400895462904582 | T | T | T |
| 0.8822663505540205 | 0.8835757249914186  | 0.9124072614208339 | T | T | T |
| 0.6923050528004805 | 0.1350518897940005  | 0.8971854188184323 | T | T | T |
| 0.6831594638421118 | -0.0007863374097341 | 0.9041650785003043 | T | T | T |
| 0.7080870402907712 | 0.8710927683402133  | 0.9603816460279251 | T | T | T |
| 0.4868530005660136 | 0.0458145967752434  | 0.7104754259185291 | T | T | T |
| 0.4861523335784589 | 0.8667461208793482  | 0.7111212657187200 | T | T | T |
| 0.3528868062392254 | 0.4364790144514820  | 0.7153319273004692 | T | T | T |
| 0.2958484700480664 | 0.4285931969150826  | 0.8921614559670235 | T | T | T |
| 0.2008267799201940 | 0.4431846153944383  | 0.0317457181912439 | T | T | T |
| 0.1065421438892344 | 0.4287521656463112  | 0.8920580166391168 | T | T | T |
| 0.1006153715452532 | 0.4448940577878774  | 0.6954452581621149 | T | T | T |
| 0.2261560425521645 | 0.4703965540619410  | 0.7358255387810015 | T | T | T |
| 0.3586692380163308 | 0.6686007387268205  | 0.7443609665712493 | T | T | T |
| 0.2987997284436168 | 0.6596159037607198  | 0.9160928713259904 | T | T | T |
| 0.1925309725302565 | 0.6447945145872976  | 0.0335901303867531 | T | T | T |
| 0.0989954957651662 | 0.6692005814622617  | 0.8985155252350834 | T | T | T |
| 0.1028752386078399 | 0.6564100590573164  | 0.7028999685203783 | T | T | T |
| 0.2295363831625003 | 0.6374247029238735  | 0.7503628205657626 | T | T | T |
| 0.3200687106364983 | 0.5488315565074595  | 0.8111116713580603 | T | T | T |
| 0.0840384522500041 | 0.5495230694224782  | 0.8188879706703761 | T | T | T |
| 0.4289284424945271 | 0.3730945164430896  | 0.5845719356445177 | T | T | T |
| 0.4152201103619067 | 0.5052424884172865  | 0.5690435576631769 | T | T | T |
| 0.3949550480369902 | 0.6376352800499915  | 0.5590842143493012 | T | T | T |
| 0.1941095623450566 | 0.3700974444152887  | 0.6111299352379524 | T | T | T |
| 0.1781797318058828 | 0.4968076501643530  | 0.5542831720032836 | T | T | T |
| 0.1916321224174782 | 0.6308347660487666  | 0.5594502890187273 | T | T | T |
| 0.9909410505698274 | 0.4542463428548415  | 0.7993603165242821 | T | T | T |
| 0.9872675875940674 | 0.6414806298800181  | 0.8001946253338607 | T | T | T |
| 0.1389178552347177 | 0.5586477254227697  | 0.2144019082397094 | T | T | T |
| 0.1973287296189203 | 0.5660240793493959  | 0.3892354215954693 | T | T | T |
| 0.2961546244587058 | 0.5516092667563869  | 0.5223276905874891 | T | T | T |
| 0.3973000295283502 | 0.5669436080454715  | 0.3941831906401342 | T | T | T |

**Structure files (CONTCAR) involved in this work:**

|                    |                    |                    |   |   |   |
|--------------------|--------------------|--------------------|---|---|---|
| 0.3976352563768086 | 0.5484133384023732 | 0.1973113336511698 | T | T | T |
| 0.2686978640801569 | 0.5315347597402130 | 0.2321501585498135 | T | T | T |
| 0.1414640878835876 | 0.3253907052981052 | 0.2394867574464040 | T | T | T |
| 0.1930757013213316 | 0.3396872798238270 | 0.4174345357099108 | T | T | T |
| 0.3079979803094775 | 0.3503360184717243 | 0.5129941499311761 | T | T | T |
| 0.4143452699724171 | 0.3251167515577104 | 0.3997627084747928 | T | T | T |
| 0.3963148957999437 | 0.3389404744354477 | 0.2040895695251327 | T | T | T |
| 0.2703573159476313 | 0.3550148603663928 | 0.2569320197779625 | T | T | T |
| 0.1781461768172302 | 0.4464694426078676 | 0.3017552046445927 | T | T | T |
| 0.4145395449684511 | 0.4457597013175396 | 0.3214808971759883 | T | T | T |
| 0.0658676367546795 | 0.6236145661103161 | 0.0808634457669721 | T | T | T |
| 0.0802131039076152 | 0.4918307791147880 | 0.0628313458292176 | T | T | T |
| 0.0981755610205881 | 0.3598222196635145 | 0.0587329912970022 | T | T | T |
| 0.3128590812173931 | 0.6274084770301896 | 0.1079677390829573 | T | T | T |
| 0.3196373682566224 | 0.4985122731380420 | 0.0555462457385292 | T | T | T |
| 0.3056691829357427 | 0.3646825981121586 | 0.0638810487130983 | T | T | T |
| 0.5099988188191019 | 0.5371779692989647 | 0.2934273177926709 | T | T | T |
| 0.5152315164622494 | 0.3621782793314445 | 0.2826490104438628 | T | T | T |
| 0.4427350125575352 | 0.7470811334900862 | 0.6461070328405542 | T | T | T |
| 0.1945055195498081 | 0.7473719860671020 | 0.6494629607599423 | T | T | T |
| 0.2749862346907744 | 0.7486937232719653 | 0.0581678190631124 | T | T | T |
| 0.1072229001339688 | 0.7476039878259463 | 0.0566368235688666 | T | T | T |
| 0.0590854589249559 | 0.2460261806936779 | 0.1381677916241075 | T | T | T |
| 0.3058052468860302 | 0.2472173341815499 | 0.1518345539436584 | T | T | T |
| 0.2252583149372024 | 0.2486618030344487 | 0.5547191535871585 | T | T | T |
| 0.3900063359071709 | 0.2476162353190728 | 0.5535549441918827 | T | T | T |
| 0.5613162180666462 | 0.2465239695720050 | 0.3522990723086035 | T | T | T |
| 0.8247936717762285 | 0.2482556879073001 | 0.3861728082076284 | T | T | T |
| 0.7170395673749125 | 0.2466851395885079 | 1.0026162253701134 | T | T | T |
| 0.9082315031583408 | 0.2564344596127627 | 0.9493701231817789 | T | T | T |
| 0.9191651019625321 | 0.7611019848694447 | 0.8829860081114490 | T | T | T |
| 0.6751215488014980 | 0.7404681946874450 | 0.8927551574920908 | T | T | T |
| 0.5878392077367768 | 0.7482901790688389 | 0.4626667960192272 | T | T | T |
| 0.7716599562720772 | 0.6837270543649963 | 0.0885854442327139 | T | T | T |
| 0.6685584347313346 | 0.7683459580534492 | 0.1210018814360252 | T | T | T |
| 0.8334237611292655 | 0.8059978236212951 | 0.0945260915027301 | T | T | T |
| 0.7875225863489533 | 0.7515844505773547 | 0.5070001024653072 | T | T | T |
| 0.9141300369916077 | 0.6777995060720557 | 0.8387863454001571 | T | T | T |
| 0.6779667775230821 | 0.8261027130874696 | 0.8499359921458096 | T | T | T |
| 0.7691687698069058 | 0.6672834175064498 | 0.4903441251250351 | T | T | T |
| 0.6834611438357080 | 0.6983782522041393 | 0.0441128759136347 | T | T | T |
| 0.7390996208826645 | 0.8168237175491067 | 0.0802367498433188 | T | T | T |
| 0.8618317388356950 | 0.7262504543845602 | 0.0352083147750339 | T | T | T |
| 0.9408917529558908 | 0.7332719758018937 | 0.1358682541093923 | T | T | T |
| 0.9136840303705787 | 0.7227176867180902 | 0.2363545033301750 | T | T | T |
| 0.9602928779980876 | 0.7830786000949697 | 0.1163535971297172 | T | T | T |
| 0.8641242688263173 | 0.8448930036101749 | 0.0910507640700082 | T | T | T |
| 0.9668453646045583 | 0.6912205016744817 | 0.0997066324519481 | T | T | T |
| 0.8834304414755928 | 0.7643613013620576 | 0.2651174660065908 | T | T | T |
| 0.9581621165691757 | 0.7183504921505093 | 0.2862893243412329 | T | T | T |
| 0.8876952455213146 | 0.6746312249668209 | 0.2461419864375438 | T | T | T |
| 0.7727221521269032 | 0.6731779616713146 | 0.1603356765627051 | T | T | T |

**Structure files (CONTCAR) involved in this work:**

**Figure 4(b) Route(b-i)-Cu ④ as same as Route(a)-Cu ④**

**Figure 4(c) Route(a)-Ga ①**

Si Al O Ga H C

1.0000000000000000  
20.0219999999999985 0.0000000000000000 0.0000000000000000  
0.0000000000000000 19.8990000000000009 0.0000000000000000  
0.0000000000000000 0.0000000000000000 13.3829999999999991  
93 3 192 1 6 2

Selective dynamics

Direct

|                    |                    |                    |   |   |   |
|--------------------|--------------------|--------------------|---|---|---|
| 0.4221071774181942 | 0.0570654300672522 | 0.6480840841697946 | T | T | T |
| 0.3010211488180128 | 0.0269205629121908 | 0.7891703822096132 | T | T | T |
| 0.2794712148953420 | 0.0606234734094796 | 0.0124524089759440 | T | T | T |
| 0.1197481404295355 | 0.0641237514264353 | 0.0134395261118472 | T | T | T |
| 0.0670745692429643 | 0.0300778997520221 | 0.8002802306835569 | T | T | T |
| 0.1761863502714669 | 0.0562820050090883 | 0.6515130210927764 | T | T | T |
| 0.4194199778021160 | 0.8271194331424816 | 0.6703261642330556 | T | T | T |
| 0.3015937302751821 | 0.8685147889561939 | 0.8092992292208628 | T | T | T |
| 0.2669330625539724 | 0.8286017011829691 | 0.0296525095458094 | T | T | T |
| 0.1119570972808493 | 0.8268273461199545 | 0.0171057957326647 | T | T | T |
| 0.0614784005269742 | 0.8709557653865311 | 0.8028768631609898 | T | T | T |
| 0.1787680768223640 | 0.8280905927807607 | 0.6734697765542776 | T | T | T |
| 0.0747767047505262 | 0.9431257714504971 | 0.1506998424075154 | T | T | T |
| 0.1956970014568172 | 0.9733111960100003 | 0.2932414360663649 | T | T | T |
| 0.2164601472471281 | 0.9373213221152662 | 0.5146667135218490 | T | T | T |
| 0.3759853626014070 | 0.9339376508217537 | 0.5157629435626719 | T | T | T |
| 0.4295305724517121 | 0.9694811469618191 | 0.3047726381862769 | T | T | T |
| 0.3201914539266543 | 0.9450646620991477 | 0.1551964930042142 | T | T | T |
| 0.0780617555673728 | 0.1733617559977931 | 0.1657787226452125 | T | T | T |
| 0.1955824400206506 | 0.1306545185912638 | 0.3076434151479559 | T | T | T |
| 0.2312511397829851 | 0.1733842164381794 | 0.5250594217863827 | T | T | T |
| 0.3859119993434958 | 0.1738606165357864 | 0.5126695576741127 | T | T | T |
| 0.4360319068886225 | 0.1277590255168499 | 0.3019744388456446 | T | T | T |
| 0.3183688228051246 | 0.1676456649044067 | 0.1711764921437272 | T | T | T |
| 0.5821970215917917 | 0.5551876372754486 | 0.3504597297897309 | T | T | T |
| 0.6961025386444485 | 0.5280969055955385 | 0.1904537443013983 | T | T | T |
| 0.7109514846614663 | 0.5660022926105474 | 0.9777296309092249 | T | T | T |
| 0.8698672060626182 | 0.5607572265488119 | 0.9759038031801265 | T | T | T |
| 0.9335198158185574 | 0.5294783272394566 | 0.1870006120751367 | T | T | T |
| 0.5756979852234090 | 0.3295215489867676 | 0.3357915124917010 | T | T | T |
| 0.7062705010642366 | 0.3731416070510387 | 0.2160148461177902 | T | T | T |
| 0.7313703298732966 | 0.3275842534364657 | 0.9978257136241457 | T | T | T |
| 0.8827211916240651 | 0.3284770451376517 | 0.9837239183195164 | T | T | T |
| 0.9354603907833565 | 0.3729316250097252 | 0.1992833152873351 | T | T | T |
| 0.9250794016222197 | 0.4380758127848636 | 0.8388952531048430 | T | T | T |
| 0.7762531558099544 | 0.4394077731022539 | 0.4802519146765489 | T | T | T |
| 0.6177620044080578 | 0.4319933338246700 | 0.4926639897835602 | T | T | T |
| 0.5679294293735602 | 0.4673646001305481 | 0.7091983824587872 | T | T | T |
| 0.6704023427105303 | 0.4349794886819298 | 0.8624687712485434 | T | T | T |
| 0.9180056626493259 | 0.6730001858954158 | 0.8295630654751994 | T | T | T |
| 0.8000907108688066 | 0.6334000174062880 | 0.6976034578419590 | T | T | T |
| 0.7671726665015915 | 0.6680505641040005 | 0.4795121172605308 | T | T | T |

**Structure files (CONTCAR) involved in this work:**

|                    |                    |                    |   |   |   |
|--------------------|--------------------|--------------------|---|---|---|
| 0.6116368758141112 | 0.6706991355598307 | 0.4867600157160623 | T | T | T |
| 0.5633866347162411 | 0.6258413763159411 | 0.7042708427956135 | T | T | T |
| 0.6806797344978270 | 0.6815625540129998 | 0.8248221870619740 | T | T | T |
| 0.5742625015600310 | 0.9432672847955257 | 0.3650373313617605 | T | T | T |
| 0.6944414728083902 | 0.9733158344644344 | 0.2227938670017124 | T | T | T |
| 0.7175408649888826 | 0.9421335512591769 | 1.0000539855363706 | T | T | T |
| 0.8774730501221005 | 0.9344869658511639 | 0.9961273341886041 | T | T | T |
| 0.9301130375424602 | 0.9702846232567220 | 0.2072128460774037 | T | T | T |
| 0.8199083102756868 | 0.9420288092634866 | 0.3572268092927329 | T | T | T |
| 0.5795969988347008 | 0.1746656378275241 | 0.3358523028238520 | T | T | T |
| 0.6971202390048912 | 0.1309310053154298 | 0.2010702283649617 | T | T | T |
| 0.7303920685578623 | 0.1717599026130268 | 0.9798291550271279 | T | T | T |
| 0.8848722548277989 | 0.1738394505557354 | 0.9946967071192198 | T | T | T |
| 0.9336382804828186 | 0.1286814463071913 | 0.2061666730021711 | T | T | T |
| 0.8186166289472604 | 0.1697444203872800 | 0.3406097271000184 | T | T | T |
| 0.9230072506398691 | 0.0579716613982753 | 0.8627667849126679 | T | T | T |
| 0.8036220757437521 | 0.0292712005579399 | 0.7225884105811141 | T | T | T |
| 0.7798780658104820 | 0.0590500670488559 | 0.4979988730830973 | T | T | T |
| 0.6201661479195659 | 0.0675634203882549 | 0.4943737746732852 | T | T | T |
| 0.5671433445727934 | 0.0321465675839655 | 0.7030308406668118 | T | T | T |
| 0.6768589476785736 | 0.0567820141514625 | 0.8553651941759617 | T | T | T |
| 0.9175294327605589 | 0.8258571648449914 | 0.8408588799382062 | T | T | T |
| 0.8020935863632405 | 0.8735038110837064 | 0.7049066515946841 | T | T | T |
| 0.7671654352347262 | 0.8293997827225764 | 0.4872141233613119 | T | T | T |
| 0.6122376233846408 | 0.8259007055489114 | 0.4979220151538690 | T | T | T |
| 0.5621201944368610 | 0.8755326560526669 | 0.7043290713584981 | T | T | T |
| 0.6775237054184540 | 0.8378825944472709 | 0.8384164875775653 | T | T | T |
| 0.4232405842109724 | 0.4453944986128165 | 0.6407360700691332 | T | T | T |
| 0.3041556784828695 | 0.4743494942001369 | 0.7883038571888028 | T | T | T |
| 0.2858828875459426 | 0.4337391115502907 | 0.0069464144961968 | T | T | T |
| 0.1284724340795137 | 0.4320034045573775 | 0.0039952647693241 | T | T | T |
| 0.0751112983515536 | 0.4719556321044563 | 0.7974136613211396 | T | T | T |
| 0.1825178570866778 | 0.4500130288337920 | 0.6455898488188588 | T | T | T |
| 0.4233261455546181 | 0.6722855685738913 | 0.6637227865229409 | T | T | T |
| 0.3012741792887495 | 0.6307501641994997 | 0.7993709360818815 | T | T | T |
| 0.2696141230269165 | 0.6726679721019292 | 0.0180427460453907 | T | T | T |
| 0.1155070260205147 | 0.6738027892640901 | 0.0077043832858355 | T | T | T |
| 0.0653462313726336 | 0.6294270129739885 | 0.7989706230586875 | T | T | T |
| 0.1790879507570032 | 0.6693463695334690 | 0.6631481902700257 | T | T | T |
| 0.0796493110174731 | 0.5537806442948227 | 0.1341997854852083 | T | T | T |
| 0.2004252979566593 | 0.5287403610277048 | 0.2803988728818504 | T | T | T |
| 0.2221363703436275 | 0.5678923036493636 | 0.5016817650311479 | T | T | T |
| 0.3831547082237574 | 0.5695208824876445 | 0.5040845976725595 | T | T | T |
| 0.4350118056334198 | 0.5282196025660494 | 0.2945760073335696 | T | T | T |
| 0.3278374651746296 | 0.5531465154130271 | 0.1422584372477540 | T | T | T |
| 0.0810391066327898 | 0.3285107556394837 | 0.1575122494502642 | T | T | T |
| 0.1965142546788453 | 0.3704701281429371 | 0.3034431361367034 | T | T | T |
| 0.2328361913886945 | 0.3302095907736904 | 0.5226258269660788 | T | T | T |
| 0.3873342069446528 | 0.3273219307790266 | 0.5095493942261929 | T | T | T |
| 0.4345158087757026 | 0.3706776929472911 | 0.2947682137012026 | T | T | T |
| 0.3174820358896316 | 0.3261199450429331 | 0.1660853891513273 | T | T | T |
| 0.8107405473549001 | 0.5622554079302269 | 0.3271184770931332 | T | T | T |
| 0.8300223324664895 | 0.3295384500569837 | 0.3530763507703451 | T | T | T |

**Structure files (CONTCAR) involved in this work:**

|                    |                    |                    |   |   |   |
|--------------------|--------------------|--------------------|---|---|---|
| 0.7929559999283350 | 0.4738812783096356 | 0.7278235402628412 | T | T | T |
| 0.3566193684352517 | 0.0623873956885495 | 0.7189614308670964 | T | T | T |
| 0.2993736246879967 | 0.0658942412893390 | 0.8954848074214554 | T | T | T |
| 0.1993409700545223 | 0.0515074300867072 | 0.0274671820273214 | T | T | T |
| 0.1004122028138240 | 0.0672722419202641 | 0.8961896298606261 | T | T | T |
| 0.1014393974044997 | 0.0578930857241076 | 0.6984463058519933 | T | T | T |
| 0.2277808331600782 | 0.0326631460054590 | 0.7382846400707548 | T | T | T |
| 0.3572933508626502 | 0.8263316341305381 | 0.7481499902477331 | T | T | T |
| 0.3039136561364517 | 0.8436081813975548 | 0.9243197676096829 | T | T | T |
| 0.1892087990672908 | 0.8522757790824150 | 0.0207614038271721 | T | T | T |
| 0.0839746719617765 | 0.8323709998043075 | 0.9041469697969677 | T | T | T |
| 0.1013968472315272 | 0.8382321719986557 | 0.7083880694105641 | T | T | T |
| 0.2276437621985262 | 0.8546717795597150 | 0.7625966127894792 | T | T | T |
| 0.3193818771430462 | 0.9480153153867932 | 0.8037709553591790 | T | T | T |
| 0.0802109999690839 | 0.9498789550895101 | 0.8116639688845757 | T | T | T |
| 0.4303668254953922 | 0.1265662046431919 | 0.5853449866473792 | T | T | T |
| 0.4162208782396836 | 0.9948050909681108 | 0.5696929715859171 | T | T | T |
| 0.3966770689230869 | 0.8627830253822099 | 0.5664024474219798 | T | T | T |
| 0.1938564097648041 | 0.1312081140815514 | 0.6120409741060280 | T | T | T |
| 0.1783908218512706 | 0.0029716459005855 | 0.5594212158163452 | T | T | T |
| 0.1923572705939882 | 0.8689863841406014 | 0.5704725416628422 | T | T | T |
| 0.9879254303392772 | 0.0464674733166199 | 0.7921866384356677 | T | T | T |
| 0.9814574851869217 | 0.8618152791630901 | 0.7870830682615561 | T | T | T |
| 0.1405971972173207 | 0.9391921796531207 | 0.2207919042999849 | T | T | T |
| 0.1974436349642991 | 0.9312308002208065 | 0.3972126136877999 | T | T | T |
| 0.2964219012198525 | 0.9472176516605865 | 0.5300618293876661 | T | T | T |
| 0.3952304330502755 | 0.9301680870090613 | 0.3983511461817101 | T | T | T |
| 0.3951322400767785 | 0.9452301674949223 | 0.2009918620469543 | T | T | T |
| 0.2688809008189719 | 0.9703497859914586 | 0.2415250588922258 | T | T | T |
| 0.1411457748941882 | 0.1710652461157579 | 0.2415960222218225 | T | T | T |
| 0.1938640429089759 | 0.1625288195661298 | 0.4188598498221237 | T | T | T |
| 0.3084726808028208 | 0.1484027454336693 | 0.5160325037337141 | T | T | T |
| 0.4131184375573117 | 0.1709286123139205 | 0.3989737608797170 | T | T | T |
| 0.3956788473538392 | 0.1555004014178744 | 0.2044767008541470 | T | T | T |
| 0.2698276574388089 | 0.1393050106096518 | 0.2596135759622911 | T | T | T |
| 0.1761397531810045 | 0.0514670646255260 | 0.3131790868761286 | T | T | T |
| 0.4177343336547774 | 0.0494827697575912 | 0.3212973246343444 | T | T | T |
| 0.0668224838366092 | 0.8718135684643751 | 0.0922300315490497 | T | T | T |
| 0.0801316550844068 | 0.0030076982905899 | 0.0681445005041613 | T | T | T |
| 0.0977377295995625 | 0.1353139326414441 | 0.0624307788682180 | T | T | T |
| 0.3025917284433959 | 0.8691917195480209 | 0.1197763661693801 | T | T | T |
| 0.3167488181629828 | 0.9953055490622870 | 0.0595255331769367 | T | T | T |
| 0.3037137356739738 | 0.1292155274375612 | 0.0666640230646019 | T | T | T |
| 0.5084063731190485 | 0.9523376690581860 | 0.2957101969576522 | T | T | T |
| 0.5158512435198432 | 0.1366212460747711 | 0.2846317872147698 | T | T | T |
| 0.6467864823838136 | 0.5559004287665932 | 0.2784320447085427 | T | T | T |
| 0.6778278776259284 | 0.5690119392102257 | 0.0882319710311843 | T | T | T |
| 0.7906390378254265 | 0.5484280106982181 | 0.9856139102572306 | T | T | T |
| 0.9048730216634766 | 0.5627351781402391 | 0.0862780132861187 | T | T | T |
| 0.9014339830309378 | 0.5681724347137167 | 0.2901785808940182 | T | T | T |
| 0.7729476201871571 | 0.5433809822350713 | 0.2167098422449574 | T | T | T |
| 0.6428558644088656 | 0.3378638606403528 | 0.2713787395400160 | T | T | T |
| 0.7227633471289188 | 0.3266880023776682 | 0.1181971151663162 | T | T | T |

**Structure files (CONTCAR) involved in this work:**

|                    |                    |                    |   |   |   |
|--------------------|--------------------|--------------------|---|---|---|
| 0.8063727748828595 | 0.3552591674153233 | 0.9694108253052028 | T | T | T |
| 0.9063687859315269 | 0.3379395917732259 | 0.0982228992308337 | T | T | T |
| 0.9087007396284401 | 0.3393837865463897 | 0.2998478564700087 | T | T | T |
| 0.7693766433221346 | 0.3764366637811964 | 0.2903505649767101 | T | T | T |
| 0.6835524977597309 | 0.4475237341264500 | 0.1764724103600358 | T | T | T |
| 0.9125448387105733 | 0.4522997203783349 | 0.1957114017993564 | T | T | T |
| 0.5717377647366292 | 0.6285757429263945 | 0.4014092714575729 | T | T | T |
| 0.5927557966475501 | 0.5011385541292191 | 0.4407461915139793 | T | T | T |
| 0.5808361699920226 | 0.3679059803279186 | 0.4432250383128427 | T | T | T |
| 0.7992490639934072 | 0.6402018206134152 | 0.3782803129825016 | T | T | T |
| 0.8033996535618670 | 0.4993905479374501 | 0.4140459780019325 | T | T | T |
| 0.8290778762623029 | 0.3734868597181110 | 0.4752847823563722 | T | T | T |
| 0.0127807112849282 | 0.5419583598624913 | 0.2012708941776843 | T | T | T |
| 0.0170086855751473 | 0.3717955975495754 | 0.1944818179134530 | T | T | T |
| 0.8731158708864726 | 0.4292927411100808 | 0.7420771051623339 | T | T | T |
| 0.7987778184573974 | 0.4587313079393115 | 0.5972889385770271 | T | T | T |
| 0.6980702649029735 | 0.4227601925792945 | 0.4771697704923400 | T | T | T |
| 0.6010179203060213 | 0.4334558086817303 | 0.6104395041165248 | T | T | T |
| 0.5977662830939395 | 0.4301920355618348 | 0.8072787329185471 | T | T | T |
| 0.7302915528214002 | 0.4300486448164808 | 0.7824332052393524 | T | T | T |
| 0.8634612323875861 | 0.6762140112655974 | 0.7406593133437892 | T | T | T |
| 0.8062405740253896 | 0.6360657436238247 | 0.5762458510168368 | T | T | T |
| 0.6888519687216967 | 0.6461533301245143 | 0.4901920354629629 | T | T | T |
| 0.5782212657538990 | 0.6577634701229349 | 0.5952087209948647 | T | T | T |
| 0.6041191500295583 | 0.6659756333872433 | 0.7907136035866046 | T | T | T |
| 0.7298142536352237 | 0.6693738464030364 | 0.7293529660548164 | T | T | T |
| 0.8026329525634954 | 0.5585996995724963 | 0.7436959354047249 | T | T | T |
| 0.5854686784278563 | 0.5473008819752899 | 0.7082240604913382 | T | T | T |
| 0.9298384890854486 | 0.3705071198385136 | 0.9057429040794975 | T | T | T |
| 0.9011424588697012 | 0.4995441561063579 | 0.9094242702216286 | T | T | T |
| 0.8885977063262954 | 0.6320316598397668 | 0.9250334792753639 | T | T | T |
| 0.6757987724710163 | 0.3747009882088633 | 0.9444691581411471 | T | T | T |
| 0.6724278332576084 | 0.5079160479739739 | 0.9167060422821867 | T | T | T |
| 0.7022192114510466 | 0.6372949356905409 | 0.9211389639494467 | T | T | T |
| 0.4875512371911073 | 0.4575025320794756 | 0.7111924144065095 | T | T | T |
| 0.4832815107752048 | 0.6343464875015247 | 0.7241484052401729 | T | T | T |
| 0.6395375705672164 | 0.9373652912382252 | 0.2939257714111833 | T | T | T |
| 0.6951389155207582 | 0.9352197014132695 | 0.1157234866754294 | T | T | T |
| 0.7980928913143925 | 0.9499158724028008 | 0.9887143590073592 | T | T | T |
| 0.9002999375624173 | 0.9291679840188364 | 0.1120327951153671 | T | T | T |
| 0.8946324267788239 | 0.9449628116077353 | 0.3097362983296508 | T | T | T |
| 0.7683332348908657 | 0.9667246225864847 | 0.2712361708130884 | T | T | T |
| 0.6412418398731869 | 0.1755295472246785 | 0.2579676216840320 | T | T | T |
| 0.6953379573252605 | 0.1529587669235103 | 0.0849236876495986 | T | T | T |
| 0.8082380239268103 | 0.1474966572422507 | 0.9846290823734063 | T | T | T |
| 0.9085999779658843 | 0.1723927715369998 | 0.1104143545454434 | T | T | T |
| 0.8959088428026458 | 0.1546140260684704 | 0.3059442545494729 | T | T | T |
| 0.7705046454454678 | 0.1430442239379601 | 0.2492569844042238 | T | T | T |
| 0.6758171442106784 | 0.0521735803988705 | 0.2101608389110554 | T | T | T |
| 0.9172317601640360 | 0.0496963546733995 | 0.1868568226951799 | T | T | T |
| 0.5658800610928697 | 0.8743936595782239 | 0.4292828329541666 | T | T | T |
| 0.5791094458681860 | 0.0065618168913035 | 0.4416581775343326 | T | T | T |
| 0.6017595583462806 | 0.1376979086937307 | 0.4390515487448943 | T | T | T |



**Structure files (CONTCAR) involved in this work:**

|                    |                    |                    |   |   |   |
|--------------------|--------------------|--------------------|---|---|---|
| 0.8035953278739387 | 0.8654052983205801 | 0.3923914413121150 | T | T | T |
| 0.8153832367504023 | 0.9918087587429522 | 0.4533100735014843 | T | T | T |
| 0.8043162873712933 | 0.1258717472250845 | 0.4410806507358582 | T | T | T |
| 0.0095309260570661 | 0.9551332566479761 | 0.2200568323242316 | T | T | T |
| 0.0140830153051251 | 0.1382969464079234 | 0.2194669970299958 | T | T | T |
| 0.8574816165281863 | 0.0677488178456260 | 0.7928206664802024 | T | T | T |
| 0.8016266917384154 | 0.0656004544839408 | 0.6144490492586597 | T | T | T |
| 0.6993230033771547 | 0.0509594836709026 | 0.4865105904499752 | T | T | T |
| 0.5980633209099905 | 0.0752935580869932 | 0.6106659728581026 | T | T | T |
| 0.6024183491321131 | 0.0530508949956691 | 0.8077027649165441 | T | T | T |
| 0.7293899921309662 | 0.0321177481679217 | 0.7705612556623981 | T | T | T |
| 0.8544788993005391 | 0.8265038196275594 | 0.7650798648775426 | T | T | T |
| 0.8044278996518628 | 0.8531470666064992 | 0.5885330366842275 | T | T | T |
| 0.6890756182573534 | 0.8523169029865095 | 0.4912820698812269 | T | T | T |
| 0.5869154777509212 | 0.8275809477692250 | 0.6132644887718410 | T | T | T |
| 0.6006889811050286 | 0.8538159645787753 | 0.8061726825555557 | T | T | T |
| 0.7269725075274015 | 0.8637726671409480 | 0.7492495294317396 | T | T | T |
| 0.8263297751289591 | 0.9510574551976900 | 0.7154993597904160 | T | T | T |
| 0.5794312693708881 | 0.9531295803794514 | 0.6774190015071957 | T | T | T |
| 0.9334352359563084 | 0.1262939941528691 | 0.9277677194644074 | T | T | T |
| 0.9168722723593519 | 0.9946970735123806 | 0.9391407939719270 | T | T | T |
| 0.8971540376413190 | 0.8633285713152232 | 0.9443090431626303 | T | T | T |
| 0.6925872198965440 | 0.1334476593016123 | 0.8889007301207315 | T | T | T |
| 0.6814904174863079 | 0.0080844752800075 | 0.9527450927206376 | T | T | T |
| 0.6939877156317515 | 0.8746357849352072 | 0.9431686225897340 | T | T | T |
| 0.4878775675279570 | 0.0471105073783575 | 0.7170065164881119 | T | T | T |
| 0.4820208224360906 | 0.8667959834382966 | 0.7209505630221655 | T | T | T |
| 0.3574119105578711 | 0.4428799923052145 | 0.7109224332330196 | T | T | T |
| 0.3041090069223517 | 0.4288780136849501 | 0.8890388260271248 | T | T | T |
| 0.2066005641701170 | 0.4499391585006630 | 0.0214187707610871 | T | T | T |
| 0.1106000789868137 | 0.4286985515246536 | 0.8856238356315135 | T | T | T |
| 0.1064059576939741 | 0.4532252035713787 | 0.6887244136581361 | T | T | T |
| 0.2307095779534331 | 0.4726075031098928 | 0.7368652194494342 | T | T | T |
| 0.3554301005332979 | 0.6673950854891291 | 0.7290381909823554 | T | T | T |
| 0.3007837228408628 | 0.6687702597793849 | 0.9063085472899326 | T | T | T |
| 0.1921967175817027 | 0.6469250741780327 | 0.0150938275104474 | T | T | T |
| 0.0917321336818588 | 0.6748006578645965 | 0.8917633715117974 | T | T | T |
| 0.1019151831540961 | 0.6545712138888863 | 0.6967280156332388 | T | T | T |
| 0.2277994903935112 | 0.6362240039750209 | 0.7475280555014253 | T | T | T |
| 0.3211475374280532 | 0.5521626074413409 | 0.8155429662231011 | T | T | T |
| 0.0840147418217123 | 0.5512895420263644 | 0.8218082473897583 | T | T | T |
| 0.4319704313930857 | 0.3744786567769999 | 0.5823305477552411 | T | T | T |
| 0.4170105954630250 | 0.5049614953984257 | 0.5582234004760439 | T | T | T |
| 0.4108858191370595 | 0.6380297580397999 | 0.5548765456157914 | T | T | T |
| 0.1969670745323919 | 0.3736335665356573 | 0.6101930023295169 | T | T | T |
| 0.1894197396535695 | 0.5004661142264740 | 0.5506850389819647 | T | T | T |
| 0.1920773933111853 | 0.6348397822971480 | 0.5547124747864326 | T | T | T |
| 0.9965739125614307 | 0.4530126618140310 | 0.7879480196133766 | T | T | T |
| 0.9850838443110561 | 0.6363065334342488 | 0.7861419170994000 | T | T | T |
| 0.1430339555736394 | 0.5605652245451741 | 0.2085313457821517 | T | T | T |
| 0.2013291658144233 | 0.5708417666795824 | 0.3844649095179936 | T | T | T |
| 0.3024455679420052 | 0.5649649568734637 | 0.5165138473674754 | T | T | T |
| 0.4037119031149665 | 0.5707070580018715 | 0.3872909162597354 | T | T | T |

**Structure files (CONTCAR) involved in this work:**

|                    |                    |                    |   |   |   |
|--------------------|--------------------|--------------------|---|---|---|
| 0.4016945438984491 | 0.5563489335978137 | 0.1918999279010117 | T | T | T |
| 0.2728723687010206 | 0.5344600428760099 | 0.2276388814317116 | T | T | T |
| 0.1382407007542061 | 0.3317825704630006 | 0.2430319510817599 | T | T | T |
| 0.1947721653947718 | 0.3427262418552281 | 0.4171641239389792 | T | T | T |
| 0.3102076497366693 | 0.3539973333088717 | 0.5118007945048396 | T | T | T |
| 0.4141948697610320 | 0.3299445589036863 | 0.3955571730465771 | T | T | T |
| 0.3941179939723294 | 0.3398728631801997 | 0.1998212753008866 | T | T | T |
| 0.2688788763230768 | 0.3563970870908473 | 0.2528651664990477 | T | T | T |
| 0.1819077185770091 | 0.4508308854375760 | 0.3028212467438251 | T | T | T |
| 0.4155461456276305 | 0.4494589054853247 | 0.3099058107024489 | T | T | T |
| 0.0688354961129952 | 0.6232325517435264 | 0.0727298964512890 | T | T | T |
| 0.0851008351742099 | 0.4915789468694979 | 0.0563161299821688 | T | T | T |
| 0.1098061159669497 | 0.3599839591601287 | 0.0532905886989875 | T | T | T |
| 0.3117017293679963 | 0.6260242320443448 | 0.0941527407437690 | T | T | T |
| 0.3277564681700472 | 0.4950540998868656 | 0.0567245546337432 | T | T | T |
| 0.3033228155991305 | 0.3623618861772702 | 0.0591941117888207 | T | T | T |
| 0.5153353293776887 | 0.5370030391406180 | 0.2870013150666936 | T | T | T |
| 0.5136298184030009 | 0.3615206600087979 | 0.2724453637649988 | T | T | T |
| 0.4412345623208611 | 0.7505813992111928 | 0.6451215162432603 | T | T | T |
| 0.1928067094944359 | 0.7490919889540913 | 0.6520133167889174 | T | T | T |
| 0.2725957488380912 | 0.7494766862980285 | 0.0574221309982358 | T | T | T |
| 0.1079474311224964 | 0.7488554505635912 | 0.0531670365300108 | T | T | T |
| 0.0609082621623042 | 0.2508832247134067 | 0.1377072580906136 | T | T | T |
| 0.3038688317207037 | 0.2466788975985355 | 0.1521532774203691 | T | T | T |
| 0.2275909944688028 | 0.2521632851416664 | 0.5554561037812321 | T | T | T |
| 0.3912825625404821 | 0.2509517444188012 | 0.5513385262657832 | T | T | T |
| 0.5598907501568190 | 0.2515608596875539 | 0.3615770722365857 | T | T | T |
| 0.8071325737574175 | 0.2469787999594117 | 0.3665726542627889 | T | T | T |
| 0.7244487446380511 | 0.2512680334780305 | 0.9563202594263347 | T | T | T |
| 0.8901001593395695 | 0.2501576404004718 | 0.9527267948278128 | T | T | T |
| 0.9364165619321355 | 0.7483426839651849 | 0.8670742224207895 | T | T | T |
| 0.6871580805143072 | 0.7588607056271470 | 0.8594193345444952 | T | T | T |
| 0.7735432112851759 | 0.7492286471834253 | 0.4780551624157132 | T | T | T |
| 0.6061152307772458 | 0.7495311676043896 | 0.4572327972029409 | T | T | T |
| 0.8861965202252914 | 0.4177097406311394 | 0.5891139768335818 | T | T | T |
| 0.9279006798435809 | 0.5981443418505317 | 0.4343027384719297 | T | T | T |
| 0.9287985463568657 | 0.6636680840643657 | 0.3423300811798353 | T | T | T |
| 0.9945220601156707 | 0.6011478833827080 | 0.3438959745197431 | T | T | T |
| 0.9691693332712055 | 0.4491184329458511 | 0.4580047677263077 | T | T | T |
| 0.9764528633540576 | 0.5010895045735582 | 0.5690399522616334 | T | T | T |
| 0.0142205591670544 | 0.4195496225292821 | 0.5670772864116815 | T | T | T |
| 0.9416036415111060 | 0.6111338727700533 | 0.3573338790502392 | T | T | T |
| 0.9723468060942797 | 0.4496382615551152 | 0.5397629375454224 | T | T | T |

**Figure 4(c) Route(a)-Ga ②**

Si Al O Ga H C

1.0000000000000000

20.0219999999999985 0.0000000000000000 0.0000000000000000

0.0000000000000000 19.8990000000000009 0.0000000000000000

0.0000000000000000 0.0000000000000000 13.3829999999999991

93 3 192 1 6 2

Selective dynamics

Direct

**Structure files (CONTCAR) involved in this work:**

|                    |                    |                    |   |   |   |
|--------------------|--------------------|--------------------|---|---|---|
| 0.4220993912416267 | 0.0570915799211128 | 0.6481584173291383 | T | T | T |
| 0.3009465986688014 | 0.0268468933036698 | 0.7889556911062999 | T | T | T |
| 0.2800549100919146 | 0.0606397563641511 | 0.0125509379935314 | T | T | T |
| 0.1203857187728303 | 0.0634485524198498 | 0.0129021865153198 | T | T | T |
| 0.0671939573367541 | 0.0296160116186259 | 0.8000459080827309 | T | T | T |
| 0.1759903843257318 | 0.0558201206093852 | 0.6510611328795586 | T | T | T |
| 0.4192151807614708 | 0.8270891595228328 | 0.6704124167515578 | T | T | T |
| 0.3012168422932548 | 0.8683940822142567 | 0.8089133875711835 | T | T | T |
| 0.2667830819751045 | 0.8282751357297525 | 0.0294024577246896 | T | T | T |
| 0.1117761764056524 | 0.8263684527644711 | 0.0173948668650647 | T | T | T |
| 0.0608534077762666 | 0.8702333770108608 | 0.8029731473605073 | T | T | T |
| 0.1783210906525387 | 0.8277133047172476 | 0.6734341024403273 | T | T | T |
| 0.0747253804509591 | 0.9428643225857284 | 0.1504930280925255 | T | T | T |
| 0.1958625719299395 | 0.9727231725554197 | 0.2931178844288369 | T | T | T |
| 0.2164512921144761 | 0.9367544998252230 | 0.5145860276442952 | T | T | T |
| 0.3759469776465512 | 0.9337531655904191 | 0.5160914367628867 | T | T | T |
| 0.4295384773722445 | 0.9694987620628470 | 0.3050762343872312 | T | T | T |
| 0.3205085276079575 | 0.9447232795157061 | 0.1549723476178479 | T | T | T |
| 0.0784430646746263 | 0.1727489325583820 | 0.1647932864493001 | T | T | T |
| 0.1960241078045465 | 0.1301336060252064 | 0.3070554007567651 | T | T | T |
| 0.2310365393104124 | 0.1728091148787915 | 0.5245985517651833 | T | T | T |
| 0.3855678476291564 | 0.1737321507144335 | 0.5126009074422470 | T | T | T |
| 0.4362357254179273 | 0.1277902763251612 | 0.3023060316603638 | T | T | T |
| 0.3189766994918742 | 0.1677018059052510 | 0.1710269328151278 | T | T | T |
| 0.5797899449465485 | 0.5579371908446552 | 0.3494000460155156 | T | T | T |
| 0.6935014543287893 | 0.5330666156575029 | 0.1914967288739388 | T | T | T |
| 0.7128586424779095 | 0.5651276458106778 | 0.9759256617205838 | T | T | T |
| 0.8714079157858928 | 0.5574123925147915 | 0.9723559941237024 | T | T | T |
| 0.9343951013880246 | 0.5296889091984388 | 0.1875135951561323 | T | T | T |
| 0.5763387478709530 | 0.3294256537831641 | 0.3384083865886321 | T | T | T |
| 0.7063949251662427 | 0.3761989907794003 | 0.2226436313779737 | T | T | T |
| 0.7345801959009298 | 0.3305582959624593 | 1.0023150707367714 | T | T | T |
| 0.8864961755324727 | 0.3279010732984630 | 0.9809588246010967 | T | T | T |
| 0.9394841840052444 | 0.3729709824727955 | 0.1969014824873502 | T | T | T |
| 0.9244118773264000 | 0.4362350172964186 | 0.8300705176658194 | T | T | T |
| 0.7768315139755521 | 0.4461643783815307 | 0.4677120736303624 | T | T | T |
| 0.6193465542776344 | 0.4339785708474902 | 0.4904083669160792 | T | T | T |
| 0.5698754897931303 | 0.4673964181343145 | 0.7086962116161121 | T | T | T |
| 0.6742874539050387 | 0.4342943477391616 | 0.8576828867766795 | T | T | T |
| 0.9172602886423790 | 0.6723946584871784 | 0.8277278102422257 | T | T | T |
| 0.7980961601706095 | 0.6342539656224593 | 0.6980880133871822 | T | T | T |
| 0.7668893409918606 | 0.6679944759740515 | 0.4794469761797183 | T | T | T |
| 0.6114075341690565 | 0.6706867406041090 | 0.4880942416250683 | T | T | T |
| 0.5643696973149506 | 0.6263043172644106 | 0.7072972093536288 | T | T | T |
| 0.6805925834419803 | 0.6825275839331760 | 0.8286783142120803 | T | T | T |
| 0.5741389767623504 | 0.9433124982001998 | 0.3661865353318198 | T | T | T |
| 0.6951748533817713 | 0.9740873978541353 | 0.2257110062944746 | T | T | T |
| 0.7167901562103687 | 0.9444762478562260 | 1.0007886558856947 | T | T | T |
| 0.8769376675294647 | 0.9343006989558763 | 0.9964729226135469 | T | T | T |
| 0.9298343115680094 | 0.9703452974367655 | 0.2085113716762382 | T | T | T |
| 0.8206369025420789 | 0.9392830779856653 | 0.3585267570414434 | T | T | T |
| 0.5798691623527971 | 0.1749287947451869 | 0.3379332352682402 | T | T | T |
| 0.6982900564136553 | 0.1327157548674218 | 0.2051102088834873 | T | T | T |

**Structure files (CONTCAR) involved in this work:**

|                    |                    |                     |   |   |   |
|--------------------|--------------------|---------------------|---|---|---|
| 0.7304364408690157 | 0.1733320891573844 | 0.9831178917330393  | T | T | T |
| 0.8849977449282866 | 0.1734842816152583 | 0.9954997709321740  | T | T | T |
| 0.9335495024233703 | 0.1291575981039216 | 0.2075333699114759  | T | T | T |
| 0.8203421401062517 | 0.1704767465374570 | 0.3448122439291744  | T | T | T |
| 0.9232634678414867 | 0.0579719780865854 | 0.8634070961815808  | T | T | T |
| 0.8036319740255659 | 0.0307438624939448 | 0.7248547076651078  | T | T | T |
| 0.7806733685765239 | 0.0570000257637800 | 0.4987023038236990  | T | T | T |
| 0.6208019729205203 | 0.0670410045897400 | 0.4957108420105459  | T | T | T |
| 0.5672918236777443 | 0.0330569036128658 | 0.7048223264495135  | T | T | T |
| 0.6765514293605260 | 0.0605510310005626 | 0.8564924163880027  | T | T | T |
| 0.9165853390136934 | 0.8252156773714659 | 0.8420842479211048  | T | T | T |
| 0.8006432008579186 | 0.8745716091696620 | 0.7086089496521063  | T | T | T |
| 0.7666458547640115 | 0.8295619242510794 | 0.4910320939462716  | T | T | T |
| 0.6120526766806964 | 0.8262667813277143 | 0.4988445212395002  | T | T | T |
| 0.5616406335385086 | 0.8760104433018601 | 0.7058463013553655  | T | T | T |
| 0.6757810783505117 | 0.8384896746327759 | 0.8417239747913000  | T | T | T |
| 0.4249021004474428 | 0.4453833079881150 | 0.6381279267728315  | T | T | T |
| 0.3052365063486197 | 0.4730504824402561 | 0.7863809459252520  | T | T | T |
| 0.2861284941960854 | 0.4322331195863877 | 0.0033234586811394  | T | T | T |
| 0.1271115284287157 | 0.4311703779759997 | -0.0004166553548457 | T | T | T |
| 0.0736189315916192 | 0.4718905509185384 | 0.7931823874636383  | T | T | T |
| 0.1828578269146041 | 0.4492526862256043 | 0.6438287942045359  | T | T | T |
| 0.4238077937283811 | 0.6721137209014062 | 0.6634927751057346  | T | T | T |
| 0.3015132139048847 | 0.6299437288406100 | 0.7990124830668547  | T | T | T |
| 0.2692121228075154 | 0.6721392408911192 | 0.0172535298340749  | T | T | T |
| 0.1147825038135760 | 0.6730000698342059 | 0.0077629714554121  | T | T | T |
| 0.0644706380136876 | 0.6295853756797504 | 0.7978466783761626  | T | T | T |
| 0.1794349160272844 | 0.6689217898316174 | 0.6627240265968647  | T | T | T |
| 0.0797726646147772 | 0.5524490543689957 | 0.1342245831471410  | T | T | T |
| 0.2008277009890213 | 0.5274599893707264 | 0.2798500687330259  | T | T | T |
| 0.2231309149790758 | 0.5677031346638954 | 0.5010846074414319  | T | T | T |
| 0.3837572475697671 | 0.5697692300086069 | 0.5035358513694612  | T | T | T |
| 0.4331895661169353 | 0.5279549215627125 | 0.2935973068519150  | T | T | T |
| 0.3267069806802922 | 0.5519993723624060 | 0.1408016503652250  | T | T | T |
| 0.0830340409291342 | 0.3276925982066145 | 0.1560497048935270  | T | T | T |
| 0.1989347304878369 | 0.3697141081302192 | 0.3013059247662878  | T | T | T |
| 0.2323450142466567 | 0.3293011672606737 | 0.5208617658209951  | T | T | T |
| 0.3865910176169837 | 0.3271140314651718 | 0.5080178897098637  | T | T | T |
| 0.4347672469788777 | 0.3704746791130782 | 0.2943184495012240  | T | T | T |
| 0.3194168486664034 | 0.3263737208738272 | 0.1653573049590811  | T | T | T |
| 0.8187221131207006 | 0.5708568279418493 | 0.3165916395024473  | T | T | T |
| 0.8322902314950696 | 0.3280438587993421 | 0.3504838689172403  | T | T | T |
| 0.7902105857284651 | 0.4763314335347697 | 0.7206587923524531  | T | T | T |
| 0.3565520771727151 | 0.0624546519687770 | 0.7188581934687119  | T | T | T |
| 0.2995899996304203 | 0.0656855135958713 | 0.8954229797547283  | T | T | T |
| 0.1999795407509425 | 0.0514045921980028 | 0.0279689722835261  | T | T | T |
| 0.1016559356717009 | 0.0663961607942689 | 0.8954164040637034  | T | T | T |
| 0.1012116578545772 | 0.0572578287487796 | 0.6978510264614821  | T | T | T |
| 0.2277238235986030 | 0.0329068929920007 | 0.7380541880326851  | T | T | T |
| 0.3569038123213763 | 0.8260733443422067 | 0.7478914405524040  | T | T | T |
| 0.3034539937726477 | 0.8436563821274708 | 0.9239240866592622  | T | T | T |
| 0.1890396977591391 | 0.8520397467130381 | 0.0214658374661282  | T | T | T |
| 0.0839892047896197 | 0.8322466426154433 | 0.9043194818852012  | T | T | T |

**Structure files (CONTCAR) involved in this work:**

|                    |                    |                    |   |   |   |
|--------------------|--------------------|--------------------|---|---|---|
| 0.1009288700582628 | 0.8375851816205855 | 0.7085014345456701 | T | T | T |
| 0.2272575862576761 | 0.8546150701801707 | 0.7622996956379148 | T | T | T |
| 0.3191624326247571 | 0.9478891882608008 | 0.8030963718498322 | T | T | T |
| 0.0791689211957104 | 0.9493089211109685 | 0.8109567347755234 | T | T | T |
| 0.4302504198731239 | 0.1265122593499762 | 0.5850685902486106 | T | T | T |
| 0.4163220878742084 | 0.9945333591139138 | 0.5702699707753260 | T | T | T |
| 0.3965642911099768 | 0.8624172461108865 | 0.5661728452396351 | T | T | T |
| 0.1932014751749458 | 0.1308026606412477 | 0.6112572762941951 | T | T | T |
| 0.1783899179298088 | 0.0024968429829186 | 0.5591049291159024 | T | T | T |
| 0.1920016075919065 | 0.8685832416440119 | 0.5704139533672360 | T | T | T |
| 0.9882354165046203 | 0.0470748355771005 | 0.7929005161194758 | T | T | T |
| 0.9808054456086617 | 0.8606150873121470 | 0.7880400149861304 | T | T | T |
| 0.1403989719162225 | 0.9390431836753592 | 0.2209551700702167 | T | T | T |
| 0.1977902923448943 | 0.9305842562875783 | 0.3970294110860337 | T | T | T |
| 0.2963617221082752 | 0.9468525228756605 | 0.5305752405460018 | T | T | T |
| 0.3950905527747297 | 0.9303743947252042 | 0.3986373330428220 | T | T | T |
| 0.3953222171889643 | 0.9449354623380157 | 0.2013466931559683 | T | T | T |
| 0.2689239930641571 | 0.9697204088553051 | 0.2410521989089990 | T | T | T |
| 0.1413310399534364 | 0.1700157203723232 | 0.2408684034872510 | T | T | T |
| 0.1940068867675178 | 0.1623403740778429 | 0.4181016033730267 | T | T | T |
| 0.3082700878519921 | 0.1478829965957950 | 0.5161431652297187 | T | T | T |
| 0.4127216337541029 | 0.1710073777186178 | 0.3988933039653333 | T | T | T |
| 0.3963191586177866 | 0.1553638505438253 | 0.2042924954469263 | T | T | T |
| 0.2702522264971098 | 0.1391400843343220 | 0.2591123187717705 | T | T | T |
| 0.1768345024647930 | 0.0509624048972851 | 0.3134802485660989 | T | T | T |
| 0.4177909715269870 | 0.0495542608721646 | 0.3213459967049978 | T | T | T |
| 0.0666026763271924 | 0.8714259618127677 | 0.0925253751181596 | T | T | T |
| 0.0807284684475569 | 0.0022841318032867 | 0.0672111792202448 | T | T | T |
| 0.0978521971347957 | 0.1345837770486619 | 0.0615221851956155 | T | T | T |
| 0.3030230992400074 | 0.8689491280934013 | 0.1190378602216813 | T | T | T |
| 0.3175350586119222 | 0.9955091428114156 | 0.0598300888025552 | T | T | T |
| 0.3043055581395043 | 0.1295087203098050 | 0.0662501872452807 | T | T | T |
| 0.5084941478415940 | 0.9528033465737002 | 0.2965435955310222 | T | T | T |
| 0.5162209535659722 | 0.1369092112435418 | 0.2864097609177455 | T | T | T |
| 0.6412758402685672 | 0.5641890049380167 | 0.2729480411522537 | T | T | T |
| 0.6733748627778886 | 0.5628002331783779 | 0.0814378910661283 | T | T | T |
| 0.7922162910034938 | 0.5484999501516273 | 0.9905545700972965 | T | T | T |
| 0.9148796965988486 | 0.5523280127523322 | 0.0731924231928162 | T | T | T |
| 0.9008699487220444 | 0.5715597905238151 | 0.2752370227600938 | T | T | T |
| 0.7682538922546502 | 0.5542324645212379 | 0.2151283620213935 | T | T | T |
| 0.6436341668165725 | 0.3368809006301535 | 0.2735004891205218 | T | T | T |
| 0.7262088649523289 | 0.3333195989049544 | 0.1226378956370973 | T | T | T |
| 0.8102034030284372 | 0.3558772114502296 | 0.9733139559132925 | T | T | T |
| 0.9169404377261147 | 0.3380990546038177 | 0.0912546986556255 | T | T | T |
| 0.9091112498470656 | 0.3358732476459481 | 0.2935687357359036 | T | T | T |
| 0.7690764087723002 | 0.3770651777863295 | 0.2996146159966312 | T | T | T |
| 0.6828896508578814 | 0.4511436105448024 | 0.1909861210908702 | T | T | T |
| 0.9150381909325287 | 0.4502507634027179 | 0.1952034677175054 | T | T | T |
| 0.5672847444635383 | 0.6288520146515439 | 0.4068737287547177 | T | T | T |
| 0.5938578090029192 | 0.5014384087390992 | 0.4355176082909672 | T | T | T |
| 0.5829131151900756 | 0.3681047681894813 | 0.4454998873759186 | T | T | T |
| 0.8018075127712545 | 0.6446843831127049 | 0.3792026099331566 | T | T | T |
| 0.8060024355342460 | 0.5033515790082280 | 0.4010221760673126 | T | T | T |

**Structure files (CONTCAR) involved in this work:**

|                    |                    |                    |   |   |   |
|--------------------|--------------------|--------------------|---|---|---|
| 0.8328950689450834 | 0.3778514637059521 | 0.4728541485661945 | T | T | T |
| 0.0153707113711841 | 0.5371367179778281 | 0.2021630689464923 | T | T | T |
| 0.0211483125393431 | 0.3702428571542653 | 0.2018097102508085 | T | T | T |
| 0.8727058954373559 | 0.4266368666330276 | 0.7288314789319802 | T | T | T |
| 0.7991380407908788 | 0.4672184472647128 | 0.5873825723363986 | T | T | T |
| 0.6999501597462716 | 0.4254321261074619 | 0.4730473763096149 | T | T | T |
| 0.6050680736208981 | 0.4371457903175845 | 0.6087659478155126 | T | T | T |
| 0.6008469496733001 | 0.4285426806813812 | 0.8049939613741730 | T | T | T |
| 0.7328520981754532 | 0.4252877140937747 | 0.7747744802292170 | T | T | T |
| 0.8626231696792444 | 0.6760947129635599 | 0.7388568944698016 | T | T | T |
| 0.8026928248024888 | 0.6330111729356255 | 0.5771964273762941 | T | T | T |
| 0.6881514376900125 | 0.6451907262594554 | 0.4845305955916247 | T | T | T |
| 0.5818053575830754 | 0.6581649423820384 | 0.5992884693416417 | T | T | T |
| 0.6038993607519934 | 0.6659776556594454 | 0.7955707647873523 | T | T | T |
| 0.7289105111429947 | 0.6713990047820038 | 0.7317976064778392 | T | T | T |
| 0.7998717721673558 | 0.5592918536163538 | 0.7454830435241004 | T | T | T |
| 0.5856477572285168 | 0.5475077154261758 | 0.7122521901067760 | T | T | T |
| 0.9294173629360964 | 0.3680642523717814 | 0.8944153294231127 | T | T | T |
| 0.8940214108084931 | 0.4967599179848146 | 0.8942621769190333 | T | T | T |
| 0.8889572111431336 | 0.6289133965018571 | 0.9209699759150529 | T | T | T |
| 0.6806229064222336 | 0.3777389264412894 | 0.9452166163501841 | T | T | T |
| 0.6792997740592169 | 0.5093681960436408 | 0.9036538811536218 | T | T | T |
| 0.7042606049320749 | 0.6380583669706946 | 0.9236196524218763 | T | T | T |
| 0.4898220814909412 | 0.4552273933781331 | 0.7084021085602433 | T | T | T |
| 0.4838710479791548 | 0.6344292834650531 | 0.7239677562219856 | T | T | T |
| 0.6394524529093936 | 0.9380367814712797 | 0.2951405228078364 | T | T | T |
| 0.6939769314407213 | 0.9393941321623466 | 0.1163532457996683 | T | T | T |
| 0.7974895826517088 | 0.9494998457249351 | 0.9890167712269615 | T | T | T |
| 0.8997923506412662 | 0.9305503622945215 | 0.1123943956340901 | T | T | T |
| 0.8952392457463374 | 0.9431082396634884 | 0.3106508253715318 | T | T | T |
| 0.7690488972888337 | 0.9636167637343710 | 0.2722104148474768 | T | T | T |
| 0.6412072741737093 | 0.1771922088895393 | 0.2594444083443463 | T | T | T |
| 0.6964727174109048 | 0.1522132839085680 | 0.0879919330193696 | T | T | T |
| 0.8080719154966129 | 0.1482014957909047 | 0.9841629968706137 | T | T | T |
| 0.9073042576959124 | 0.1724479300628538 | 0.1118883902915798 | T | T | T |
| 0.8972890286532869 | 0.1568452772831514 | 0.3077386478710257 | T | T | T |
| 0.7713569304597441 | 0.1484973196421250 | 0.2520762865637107 | T | T | T |
| 0.6791136949471914 | 0.0539011697963199 | 0.2190063213977560 | T | T | T |
| 0.9159941177864472 | 0.0501292995457731 | 0.1914459589991217 | T | T | T |
| 0.5653541084716510 | 0.8742371857240367 | 0.4296631023040725 | T | T | T |
| 0.5791581373902556 | 0.0062606430279680 | 0.4436055357084307 | T | T | T |
| 0.6028800878544698 | 0.1372589909100858 | 0.4400794323035396 | T | T | T |
| 0.8044644708784494 | 0.8629733952141007 | 0.3950689246916319 | T | T | T |
| 0.8155928095288134 | 0.9897344841040520 | 0.4538817467125813 | T | T | T |
| 0.8058343933586208 | 0.1235522257911589 | 0.4415600149454570 | T | T | T |
| 0.0095183836249861 | 0.9561085071916897 | 0.2193806219633059 | T | T | T |
| 0.0141276417621317 | 0.1382584341468143 | 0.2184283480751161 | T | T | T |
| 0.8581631037739329 | 0.0698430528332382 | 0.7932085694110709 | T | T | T |
| 0.8031957096278257 | 0.0639419519220276 | 0.6145882893099471 | T | T | T |
| 0.6999530700563608 | 0.0501996292095294 | 0.4878715325335166 | T | T | T |
| 0.5987427872092527 | 0.0753257448613416 | 0.6119134331877298 | T | T | T |
| 0.6020281482695976 | 0.0556045153763711 | 0.8092711890628410 | T | T | T |
| 0.7291342608185341 | 0.0378652687217860 | 0.7706970208528010 | T | T | T |

**Structure files (CONTCAR) involved in this work:**

|                    |                    |                    |   |   |   |
|--------------------|--------------------|--------------------|---|---|---|
| 0.8532870096270873 | 0.8266758862010686 | 0.7667046195016539 | T | T | T |
| 0.8026717314734334 | 0.8574380494154060 | 0.5912117356658478 | T | T | T |
| 0.6886063308378984 | 0.8532711398655348 | 0.4910262048302754 | T | T | T |
| 0.5869270830766382 | 0.8289147917571378 | 0.6142824517328382 | T | T | T |
| 0.5989398474436634 | 0.8529969625361857 | 0.8080599737834551 | T | T | T |
| 0.7255716968888581 | 0.8638236137832853 | 0.7526812076620146 | T | T | T |
| 0.8245570702916725 | 0.9519673769077246 | 0.7237907199268412 | T | T | T |
| 0.5798622483779441 | 0.9538371329083696 | 0.6816114064016061 | T | T | T |
| 0.9340081924396495 | 0.1252598443598673 | 0.9306972951387886 | T | T | T |
| 0.9161931432981247 | 0.9939982171962878 | 0.9379925596554576 | T | T | T |
| 0.8968669056109250 | 0.8628589792322083 | 0.9457936295093307 | T | T | T |
| 0.6908678650148650 | 0.1374085206563891 | 0.8915570162472483 | T | T | T |
| 0.6828443998315086 | 0.0113354596967511 | 0.9528724184413062 | T | T | T |
| 0.6907951533981641 | 0.8773617256713921 | 0.9452933766222341 | T | T | T |
| 0.4878757815574926 | 0.0477921422346942 | 0.7172568200996109 | T | T | T |
| 0.4813610562534163 | 0.8675406755781618 | 0.7208615369598019 | T | T | T |
| 0.3588907318897613 | 0.4436136101242819 | 0.7078961910172724 | T | T | T |
| 0.3074589772348498 | 0.4269534895023386 | 0.8864438908854009 | T | T | T |
| 0.2062202075668181 | 0.4459147773670560 | 0.0117454010160210 | T | T | T |
| 0.1059144218696164 | 0.4271289867817777 | 0.8818701618229376 | T | T | T |
| 0.1060774049019335 | 0.4540296310585665 | 0.6849644918723511 | T | T | T |
| 0.2312387900447916 | 0.4691804232231949 | 0.7361422915981555 | T | T | T |
| 0.3557939619855129 | 0.6662171227938323 | 0.7283876486820813 | T | T | T |
| 0.3017452951767468 | 0.6675838036613924 | 0.9062503801027531 | T | T | T |
| 0.1918707307195539 | 0.6468386511648867 | 0.0120776763756233 | T | T | T |
| 0.0901561555460868 | 0.6738058434975783 | 0.8918638676786760 | T | T | T |
| 0.1023443481324042 | 0.6536381800883876 | 0.6961166290934759 | T | T | T |
| 0.2279693702213144 | 0.6358621813696038 | 0.7474028140136194 | T | T | T |
| 0.3204380938561267 | 0.5510317692784369 | 0.8143183281800660 | T | T | T |
| 0.0812866501187250 | 0.5506755456803506 | 0.8198380299139360 | T | T | T |
| 0.4322511090663696 | 0.3746699332036165 | 0.5787368235342369 | T | T | T |
| 0.4196294523422717 | 0.5057151964492849 | 0.5566717082611625 | T | T | T |
| 0.4116917337066702 | 0.6383386182313627 | 0.5540801988031125 | T | T | T |
| 0.1945973775705728 | 0.3728236713837152 | 0.6066428229790713 | T | T | T |
| 0.1902129235311352 | 0.5002082770828276 | 0.5499246180385858 | T | T | T |
| 0.1927953855278625 | 0.6344697406258599 | 0.5543004933891221 | T | T | T |
| 0.9947066722480504 | 0.4528043192148946 | 0.7761517517887943 | T | T | T |
| 0.9846249215179026 | 0.6374107757510642 | 0.7819211035752789 | T | T | T |
| 0.1450878096671604 | 0.5589446693669667 | 0.2058543090714315 | T | T | T |
| 0.2026690083367989 | 0.5699506604392660 | 0.3838168425509508 | T | T | T |
| 0.3032398069337628 | 0.5642602151642191 | 0.5185370208069150 | T | T | T |
| 0.4015289610832029 | 0.5708312730209438 | 0.3857478002312006 | T | T | T |
| 0.4008659667515963 | 0.5548059116948241 | 0.1895097801807703 | T | T | T |
| 0.2736801779883105 | 0.5316072933940293 | 0.2278181042852150 | T | T | T |
| 0.1440321930827621 | 0.3300531515026700 | 0.2355811713715358 | T | T | T |
| 0.1951327420914493 | 0.3403556250677342 | 0.4142598742231968 | T | T | T |
| 0.3095249110790655 | 0.3540938680561380 | 0.5119996468693567 | T | T | T |
| 0.4124676095949875 | 0.3288224444272210 | 0.3934522657687315 | T | T | T |
| 0.3965949325539700 | 0.3398135720854867 | 0.1970554925114902 | T | T | T |
| 0.2726080810422052 | 0.3578831176955990 | 0.2536384372297246 | T | T | T |
| 0.1820523770564517 | 0.4495827375573216 | 0.3039195740315170 | T | T | T |
| 0.4149141074565532 | 0.4489408017344771 | 0.3099955684220732 | T | T | T |
| 0.0691970309332143 | 0.6226883163859426 | 0.0739896885190096 | T | T | T |

**Structure files (CONTCAR) involved in this work:**

|                    |                    |                    |   |   |   |
|--------------------|--------------------|--------------------|---|---|---|
| 0.0872873295937986 | 0.4925012080335179 | 0.0519272928772899 | T | T | T |
| 0.1071073640256365 | 0.3597078769834606 | 0.0496745162336739 | T | T | T |
| 0.3100513722449243 | 0.6253874201614585 | 0.0948939264444816 | T | T | T |
| 0.3254086270118561 | 0.4950896274160126 | 0.0535610625490539 | T | T | T |
| 0.3042271863640647 | 0.3619603047043016 | 0.0583742446862273 | T | T | T |
| 0.5131156297895821 | 0.5378627550496655 | 0.2872477066355643 | T | T | T |
| 0.5143919942994513 | 0.3618279214761977 | 0.2755372517806856 | T | T | T |
| 0.4414802148064980 | 0.7505878596138614 | 0.6458649866657076 | T | T | T |
| 0.1927377471579205 | 0.7487427092781275 | 0.6521313072474031 | T | T | T |
| 0.2726095634809245 | 0.7490440070893191 | 0.0563653311503158 | T | T | T |
| 0.1078552740758128 | 0.7483439901738229 | 0.0525135312774927 | T | T | T |
| 0.0618714571806419 | 0.2502675455869394 | 0.1365956131758669 | T | T | T |
| 0.3047800651060465 | 0.2469351130958012 | 0.1531041110109293 | T | T | T |
| 0.2274230876591170 | 0.2515829232993715 | 0.5552130619761467 | T | T | T |
| 0.3905647373023332 | 0.2509815507320006 | 0.5509276485408084 | T | T | T |
| 0.5600086452539194 | 0.2516713609442134 | 0.3650435388344034 | T | T | T |
| 0.8100844376397152 | 0.2471874171937993 | 0.3775641606924167 | T | T | T |
| 0.7254729210915162 | 0.2536100138955598 | 0.9647506470758840 | T | T | T |
| 0.8913286224691095 | 0.2492548170502989 | 0.9512846565747123 | T | T | T |
| 0.9345635948020138 | 0.7474242867711580 | 0.8677480673408724 | T | T | T |
| 0.6860774869217329 | 0.7597356951796409 | 0.8645223407145500 | T | T | T |
| 0.7714076613511434 | 0.7492564589274917 | 0.4899733719812824 | T | T | T |
| 0.6054430254935617 | 0.7496919170990854 | 0.4595285860718298 | T | T | T |
| 0.8777911523024265 | 0.4144471876569951 | 0.5867424579824929 | T | T | T |
| 0.0095714680372874 | 0.5523423258991506 | 0.5768885677438552 | T | T | T |
| 0.9306494422050824 | 0.5566744618167248 | 0.5142479773237453 | T | T | T |
| 0.0047002746148379 | 0.5484273545381430 | 0.4436373700683653 | T | T | T |
| 0.9442288391642695 | 0.4358440615470517 | 0.4556192977816908 | T | T | T |
| 0.9708217902510220 | 0.4377973183949976 | 0.5960237936138700 | T | T | T |
| 0.0249450944765215 | 0.4304285213374029 | 0.5027597248789772 | T | T | T |
| 0.9803140685052978 | 0.5331927711095684 | 0.5137532852218730 | T | T | T |
| 0.9769803673448650 | 0.4566439150492762 | 0.5151692735857669 | T | T | T |

**Figure 4(c) Route(a)-Ga ③**

Si Al O Ga H C

1.0000000000000000

20.0219999999999985 0.0000000000000000 0.0000000000000000

0.0000000000000000 19.8990000000000009 0.0000000000000000

0.0000000000000000 0.0000000000000000 13.3829999999999991

93 3 192 1 6 2

Selective dynamics

Direct

|                    |                    |                    |   |   |   |
|--------------------|--------------------|--------------------|---|---|---|
| 0.4219626230215113 | 0.0567513904863388 | 0.6481548509937602 | T | T | T |
| 0.3007552433478632 | 0.0266299310588254 | 0.7890627785587563 | T | T | T |
| 0.2795502829789430 | 0.0601981584710684 | 0.0123216491537948 | T | T | T |
| 0.1198763788617179 | 0.0630701131616185 | 0.0130293417265753 | T | T | T |
| 0.0671870469137781 | 0.0295372418394528 | 0.8001110202383743 | T | T | T |
| 0.1757762108126537 | 0.0554695222449708 | 0.6510460531522514 | T | T | T |
| 0.4188440016666573 | 0.8270698626417033 | 0.6701558419019981 | T | T | T |
| 0.3012074642522059 | 0.8683372202021428 | 0.8094268011447036 | T | T | T |
| 0.2668482164430409 | 0.8281462767632198 | 0.0295698193243022 | T | T | T |
| 0.1119405795630758 | 0.8264276210477618 | 0.0173216500064827 | T | T | T |
| 0.0614689080933624 | 0.8707004570687840 | 0.8029449505357701 | T | T | T |



**Structure files (CONTCAR) involved in this work:**

|                    |                    |                    |   |   |   |
|--------------------|--------------------|--------------------|---|---|---|
| 0.1786049000355601 | 0.8277133864286529 | 0.6737608711211438 | T | T | T |
| 0.0744606048741096 | 0.9425291242948850 | 0.1507522156563506 | T | T | T |
| 0.1956959052735539 | 0.9726256238862372 | 0.2933476040958400 | T | T | T |
| 0.2162774011336450 | 0.9366219283877412 | 0.5146402227934154 | T | T | T |
| 0.3755861905240897 | 0.9339250937244702 | 0.5156976390081713 | T | T | T |
| 0.4289559070151339 | 0.9698127099191077 | 0.3049457655608896 | T | T | T |
| 0.3201422926552737 | 0.9446697544431475 | 0.1546928102197665 | T | T | T |
| 0.0781977376240023 | 0.1721735766266688 | 0.1651736854221263 | T | T | T |
| 0.1957283687344923 | 0.1299822899597489 | 0.3076416393020749 | T | T | T |
| 0.2305932202944705 | 0.1728510342182732 | 0.5249261747117475 | T | T | T |
| 0.3852933401177732 | 0.1736968994377234 | 0.5134393817963196 | T | T | T |
| 0.4358411020937040 | 0.1279219914105003 | 0.3028821709904895 | T | T | T |
| 0.3185492380014671 | 0.1673201359294242 | 0.1711757825436308 | T | T | T |
| 0.5823408582613753 | 0.5534336333851329 | 0.3515420464287576 | T | T | T |
| 0.6929664732789029 | 0.5297533449864693 | 0.1893971271065833 | T | T | T |
| 0.7172666519901180 | 0.5651121492893207 | 0.9754880502834405 | T | T | T |
| 0.8754158329897080 | 0.5663285090947897 | 0.9892324336946017 | T | T | T |
| 0.9335659838410250 | 0.5325620591703398 | 0.1964307947126834 | T | T | T |
| 0.5751344418107579 | 0.3291778958247457 | 0.3363008521908699 | T | T | T |
| 0.6976520018837972 | 0.3750874164560322 | 0.2054013091493983 | T | T | T |
| 0.7309348291499572 | 0.3268129980016914 | 0.9911716389474882 | T | T | T |
| 0.8825427886103359 | 0.3267121277093831 | 0.9854733308682468 | T | T | T |
| 0.9356906111236187 | 0.3759132262385746 | 0.1931071832659737 | T | T | T |
| 0.9302981027685975 | 0.4436898272819830 | 0.8589884360486731 | T | T | T |
| 0.7831456875590095 | 0.4414955372522335 | 0.4884810355419810 | T | T | T |
| 0.6254038994410946 | 0.4297957828123341 | 0.4943299534958293 | T | T | T |
| 0.5673197929811871 | 0.4690719642573347 | 0.7066145665466077 | T | T | T |
| 0.6710336585950855 | 0.4344404794011569 | 0.8565397547354063 | T | T | T |
| 0.9180350114122765 | 0.6725299365299786 | 0.8292545316093621 | T | T | T |
| 0.7983222085007151 | 0.6344321929266640 | 0.6935733102130501 | T | T | T |
| 0.7673782321183616 | 0.6687926904917090 | 0.4754365519456263 | T | T | T |
| 0.6116539951254176 | 0.6704923987203864 | 0.4880278112186794 | T | T | T |
| 0.5640253530941278 | 0.6274528035447364 | 0.7054799132552841 | T | T | T |
| 0.6821811083670000 | 0.6812256298641174 | 0.8245818285102394 | T | T | T |
| 0.5736163121964761 | 0.9429233618359018 | 0.3652230025487260 | T | T | T |
| 0.6932221658567749 | 0.9728393556407107 | 0.2224055356271291 | T | T | T |
| 0.7171550550936644 | 0.9409034317060438 | 1.0004295695705003 | T | T | T |
| 0.8770812242984317 | 0.9331993093989872 | 0.9949725825801126 | T | T | T |
| 0.9295068536802007 | 0.9695291511127031 | 0.2057850238986972 | T | T | T |
| 0.8190196766685317 | 0.9432714928830012 | 0.3568217195838820 | T | T | T |
| 0.5793443248238097 | 0.1742055964293246 | 0.3369730930578757 | T | T | T |
| 0.6958644988982345 | 0.1291248480225440 | 0.2003671576376837 | T | T | T |
| 0.7303489817171321 | 0.1709246536246408 | 0.9795686565508087 | T | T | T |
| 0.8846821504768632 | 0.1730432386398095 | 0.9939367081668399 | T | T | T |
| 0.9335066707047716 | 0.1276815409556321 | 0.2046149613478730 | T | T | T |
| 0.8176216259608448 | 0.1669360738344714 | 0.3370125047563698 | T | T | T |
| 0.9229268346583603 | 0.0572712321738816 | 0.8625130023332134 | T | T | T |
| 0.8033509423409447 | 0.0295709578828917 | 0.7229563951700417 | T | T | T |
| 0.7799351610014362 | 0.0601502319429198 | 0.4980772435839789 | T | T | T |
| 0.6200921930241022 | 0.0672141209377654 | 0.4950403019322660 | T | T | T |
| 0.5670571362189866 | 0.0309467885018013 | 0.7034851169677493 | T | T | T |
| 0.6763048215836827 | 0.0557476689767571 | 0.8562866151721611 | T | T | T |
| 0.9175257886591986 | 0.8258972734913840 | 0.8384756845824288 | T | T | T |

**Structure files (CONTCAR) involved in this work:**

|                    |                    |                    |   |   |   |
|--------------------|--------------------|--------------------|---|---|---|
| 0.8012807754320851 | 0.8738864690780267 | 0.7047804484500183 | T | T | T |
| 0.7656684602275396 | 0.8300996339350378 | 0.4865223143344637 | T | T | T |
| 0.6107419531078536 | 0.8248831309364523 | 0.4963903310280747 | T | T | T |
| 0.5615943182423352 | 0.8742678804966630 | 0.7036909602330140 | T | T | T |
| 0.6768829105554807 | 0.8369590902790517 | 0.8390101346969848 | T | T | T |
| 0.4229024311327279 | 0.4454046255738621 | 0.6397194840249334 | T | T | T |
| 0.3041437233834068 | 0.4735448074518076 | 0.7882849642959613 | T | T | T |
| 0.2865470102970513 | 0.4334770966442323 | 0.0076394066102147 | T | T | T |
| 0.1286811958264299 | 0.4325105045974350 | 0.0077425896841234 | T | T | T |
| 0.0770174900086408 | 0.4732553462129891 | 0.8011992448648021 | T | T | T |
| 0.1815923102543218 | 0.4493275698883118 | 0.6460636713838568 | T | T | T |
| 0.4233312021245348 | 0.6723822844907584 | 0.6643631930927560 | T | T | T |
| 0.3009980511935704 | 0.6302764785738054 | 0.7993850188655811 | T | T | T |
| 0.2696022782773698 | 0.6720998701202840 | 0.0181700821438943 | T | T | T |
| 0.1153133926319383 | 0.6734867535485475 | 0.0090262255808193 | T | T | T |
| 0.0651121671794475 | 0.6301783168311343 | 0.8006637044452297 | T | T | T |
| 0.1785227172202920 | 0.6691878666426078 | 0.6637121676677198 | T | T | T |
| 0.0791007101860240 | 0.5542794765220861 | 0.1384006737018757 | T | T | T |
| 0.2014039395744993 | 0.5284010370319917 | 0.2805223497362211 | T | T | T |
| 0.2213470707969329 | 0.5675811539258493 | 0.5032077523047008 | T | T | T |
| 0.3815998325260834 | 0.5697720801794701 | 0.5055203997148597 | T | T | T |
| 0.4318319565151377 | 0.5269676704145648 | 0.2983610226635542 | T | T | T |
| 0.3286866215941383 | 0.5528681217948366 | 0.1429331273912779 | T | T | T |
| 0.0813602753723386 | 0.3270520963715324 | 0.1584526053588477 | T | T | T |
| 0.1973780984024809 | 0.3700152749378510 | 0.3028720990529151 | T | T | T |
| 0.2309985734625756 | 0.3296301967725089 | 0.5240865380811224 | T | T | T |
| 0.3848254026365496 | 0.3269141545012710 | 0.5126016080832264 | T | T | T |
| 0.4306767627741359 | 0.3709135164072404 | 0.2989986680147012 | T | T | T |
| 0.3184546529779005 | 0.3255832416835913 | 0.1656968471405408 | T | T | T |
| 0.8160389329512768 | 0.5623488239235180 | 0.3287627038562281 | T | T | T |
| 0.8213171347093648 | 0.3275413155046751 | 0.3287804184388823 | T | T | T |
| 0.7912127273418446 | 0.4732693849463002 | 0.7289045518174623 | T | T | T |
| 0.3565292831704550 | 0.0620345671555166 | 0.7190715599340955 | T | T | T |
| 0.2990349146282586 | 0.0658499389944217 | 0.8952158059598552 | T | T | T |
| 0.1994727704281029 | 0.0509497160006968 | 0.0277260370846212 | T | T | T |
| 0.1008152043367850 | 0.0667669298832080 | 0.8957311696833337 | T | T | T |
| 0.1010847439597101 | 0.0574596273080949 | 0.6980411655982239 | T | T | T |
| 0.2276282138651070 | 0.0321830081059252 | 0.7376931557248088 | T | T | T |
| 0.3566236350581453 | 0.8261693694841927 | 0.7476980582091092 | T | T | T |
| 0.3038841568284957 | 0.8432449861611107 | 0.9242653068682986 | T | T | T |
| 0.1892068362970006 | 0.8521844555420737 | 0.0205702240292041 | T | T | T |
| 0.0834589663666166 | 0.8321343516635470 | 0.9045059531404940 | T | T | T |
| 0.1012299247626931 | 0.8376307568279765 | 0.7085864414152002 | T | T | T |
| 0.2271755359279793 | 0.8547231776940863 | 0.7629785271884136 | T | T | T |
| 0.3191976821234551 | 0.9478117606534073 | 0.8040305322109833 | T | T | T |
| 0.0808523034441482 | 0.9495045573699141 | 0.8115758720035771 | T | T | T |
| 0.4299690294608054 | 0.1264471571694105 | 0.5858538073688535 | T | T | T |
| 0.4160718066861628 | 0.9947807440537813 | 0.5693250366033374 | T | T | T |
| 0.3963732284727720 | 0.8628059437423240 | 0.5661803752829667 | T | T | T |
| 0.1932632443206614 | 0.1303791244917576 | 0.6114720940086016 | T | T | T |
| 0.1777109359872826 | 0.0020967488339247 | 0.5590826113890226 | T | T | T |
| 0.1923883396326778 | 0.8683248635831787 | 0.5705915296447557 | T | T | T |
| 0.9879934958252594 | 0.0458206456302278 | 0.7923482557281502 | T | T | T |

**Structure files (CONTCAR) involved in this work:**

|                    |                    |                    |   |   |   |
|--------------------|--------------------|--------------------|---|---|---|
| 0.9814189421454680 | 0.8628125646912919 | 0.7862130263381165 | T | T | T |
| 0.1400303409503146 | 0.9391018379095685 | 0.2213931011938294 | T | T | T |
| 0.1978916189744661 | 0.9302177778511529 | 0.3970076577730694 | T | T | T |
| 0.2961026239240606 | 0.9472766778080381 | 0.5306755640898744 | T | T | T |
| 0.3945161020359051 | 0.9302540042023545 | 0.3981662166307371 | T | T | T |
| 0.3949566828241899 | 0.9455443407272058 | 0.2009277897067996 | T | T | T |
| 0.2685479303375950 | 0.9698982983855586 | 0.2406276348502744 | T | T | T |
| 0.1409776017159104 | 0.1696320794859767 | 0.2413194045544761 | T | T | T |
| 0.1935540416297201 | 0.1624935896044980 | 0.4184393950066536 | T | T | T |
| 0.3078852206928195 | 0.1481173853798718 | 0.5157906868983915 | T | T | T |
| 0.4131625623075497 | 0.1712596720977858 | 0.3999758443242634 | T | T | T |
| 0.3957980681637365 | 0.1556345027204377 | 0.2051265529483851 | T | T | T |
| 0.2698784570116159 | 0.1391348996011862 | 0.2595662452129337 | T | T | T |
| 0.1767280188176591 | 0.0507893084951375 | 0.3143810668303385 | T | T | T |
| 0.4170461271864217 | 0.0497625068361422 | 0.3221013188451413 | T | T | T |
| 0.0667484499130045 | 0.8712342094218476 | 0.0925769842192304 | T | T | T |
| 0.0802018316498989 | 0.0019697226580676 | 0.0674546314467669 | T | T | T |
| 0.0975328238633724 | 0.1340781598517702 | 0.0619811609757859 | T | T | T |
| 0.3028443541084098 | 0.8686995856411880 | 0.1195526798833203 | T | T | T |
| 0.3169293722530877 | 0.9947752922886361 | 0.0587999590500867 | T | T | T |
| 0.3040668945554742 | 0.1285881635890420 | 0.0668655638904964 | T | T | T |
| 0.5079146836928210 | 0.9532772608412403 | 0.2960395354417833 | T | T | T |
| 0.5157519960318983 | 0.1362923851482242 | 0.2852165039141635 | T | T | T |
| 0.6384341503465574 | 0.5618185173784389 | 0.2666298406122088 | T | T | T |
| 0.6821024821445496 | 0.5699275873181496 | 0.0838235141632577 | T | T | T |
| 0.7968187085763415 | 0.5473763472692018 | 0.9861046218411159 | T | T | T |
| 0.9057608089533113 | 0.5752486843262661 | 0.0998746908239794 | T | T | T |
| 0.9004488325733162 | 0.5547310795946948 | 0.2992380689719882 | T | T | T |
| 0.7676619687829717 | 0.5386816664128461 | 0.2276951780904663 | T | T | T |
| 0.6358723371577214 | 0.3361291263952931 | 0.2586595025817114 | T | T | T |
| 0.7178529549536088 | 0.3282627884270575 | 0.1099765768137351 | T | T | T |
| 0.8068207131669667 | 0.3547262533752911 | 0.9673862410024578 | T | T | T |
| 0.9047474633199917 | 0.3316449045571644 | 0.1011012978327353 | T | T | T |
| 0.9027512303606785 | 0.3498218706259414 | 0.2961307787960853 | T | T | T |
| 0.7604875244849968 | 0.3779273983839096 | 0.2798311488639872 | T | T | T |
| 0.6745168348154449 | 0.4499493506435234 | 0.1708135619489555 | T | T | T |
| 0.9192724756326912 | 0.4537492846011366 | 0.1686786665404708 | T | T | T |
| 0.5697526377358274 | 0.6240710977102829 | 0.4097822293351453 | T | T | T |
| 0.6065222424509195 | 0.4972155863375408 | 0.4331372042337533 | T | T | T |
| 0.5921407866707943 | 0.3643583211273363 | 0.4432385162671619 | T | T | T |
| 0.7983711902904899 | 0.6416185671928493 | 0.3741668325906468 | T | T | T |
| 0.8025875888761819 | 0.5054614494248681 | 0.4279713493804651 | T | T | T |
| 0.8318024667850388 | 0.3742014898328299 | 0.4520931509456315 | T | T | T |
| 0.0143961137153083 | 0.5433374410450159 | 0.2078305445223536 | T | T | T |
| 0.0165432413090683 | 0.3671378359950619 | 0.1991015659089421 | T | T | T |
| 0.8751870016033566 | 0.4420513454836798 | 0.7642466587495774 | T | T | T |
| 0.8153455623200210 | 0.4484082091470909 | 0.6037727032516075 | T | T | T |
| 0.7068973123729072 | 0.4183403837229444 | 0.4973477257656840 | T | T | T |
| 0.5998013407633744 | 0.4342731343788065 | 0.6083016601863384 | T | T | T |
| 0.5969178225535243 | 0.4339927483107448 | 0.8065769650550870 | T | T | T |
| 0.7275826913836996 | 0.4257795432013070 | 0.7710575420981491 | T | T | T |
| 0.8628667629350105 | 0.6727750879644304 | 0.7412874202252967 | T | T | T |
| 0.8064535687480107 | 0.6376464427938392 | 0.5732723178869407 | T | T | T |

**Structure files (CONTCAR) involved in this work:**

|                    |                    |                    |   |   |   |
|--------------------|--------------------|--------------------|---|---|---|
| 0.6888616886851338 | 0.6467290056947251 | 0.4888960202259416 | T | T | T |
| 0.5802808130037995 | 0.6621174725586670 | 0.5990225010552318 | T | T | T |
| 0.6050387967172968 | 0.6639317468626513 | 0.7951788501624990 | T | T | T |
| 0.7291509395777721 | 0.6721859455292862 | 0.7258110696667861 | T | T | T |
| 0.7966326891703398 | 0.5581515009919186 | 0.7350999233967369 | T | T | T |
| 0.5852200785390875 | 0.5486533838528974 | 0.7036628384496934 | T | T | T |
| 0.9320061628319973 | 0.3719330534898748 | 0.9143160537990422 | T | T | T |
| 0.9152391570033562 | 0.5046618644623736 | 0.9326761806693467 | T | T | T |
| 0.8899231489989150 | 0.6347699993807141 | 0.9278197780569194 | T | T | T |
| 0.6757450848378955 | 0.3722959458162814 | 0.9346937759800106 | T | T | T |
| 0.6814246254357826 | 0.5058456183651644 | 0.9124802077248001 | T | T | T |
| 0.7084538950740689 | 0.6356780483001673 | 0.9167227988578401 | T | T | T |
| 0.4871738887754695 | 0.4584855962372145 | 0.7097298839883749 | T | T | T |
| 0.4838762331672178 | 0.6357466950266926 | 0.7252824480982906 | T | T | T |
| 0.6387640275904720 | 0.9365754867495225 | 0.2938912497553985 | T | T | T |
| 0.6956332244096759 | 0.9336738613868882 | 0.1163564458275290 | T | T | T |
| 0.7975952578083255 | 0.9480275788817734 | 0.9874844381816117 | T | T | T |
| 0.8999290435876912 | 0.9281122206163863 | 0.1108407052164309 | T | T | T |
| 0.8934275673260094 | 0.9451501158299019 | 0.3081632942716168 | T | T | T |
| 0.7668633511391718 | 0.9692168356185767 | 0.2722369632879592 | T | T | T |
| 0.6420563265184352 | 0.1743838027400599 | 0.2606581133598074 | T | T | T |
| 0.6952966977098932 | 0.1549235242394508 | 0.0857972322217934 | T | T | T |
| 0.8080891103179357 | 0.1462474729754520 | 0.9845617333103738 | T | T | T |
| 0.9081025184761730 | 0.1723792702192434 | 0.1099125871498868 | T | T | T |
| 0.8954205070544984 | 0.1527750311110601 | 0.3048994009442176 | T | T | T |
| 0.7701040066083679 | 0.1362688877036414 | 0.2482983258958600 | T | T | T |
| 0.6723125488468805 | 0.0509615229532016 | 0.2058729850277178 | T | T | T |
| 0.9170116389589635 | 0.0489956033390785 | 0.1840684665275101 | T | T | T |
| 0.5641896660895412 | 0.8739061290389052 | 0.4286613619127861 | T | T | T |
| 0.5795217173756344 | 0.0060026110602221 | 0.4422193142334896 | T | T | T |
| 0.6005927939869851 | 0.1375872252905876 | 0.4409287818103216 | T | T | T |
| 0.8017420345253909 | 0.8671461890264984 | 0.3922696753448631 | T | T | T |
| 0.8163175277558887 | 0.9938411177923409 | 0.4523522757465029 | T | T | T |
| 0.8037520268068984 | 0.1281126635500756 | 0.4421049604843086 | T | T | T |
| 0.0089323603590843 | 0.9548711260156828 | 0.2193730247798917 | T | T | T |
| 0.0137269312420065 | 0.1378851722986348 | 0.2188449693313310 | T | T | T |
| 0.8575507787883165 | 0.0681767009071245 | 0.7925348250299780 | T | T | T |
| 0.8012873889532451 | 0.0659606587635934 | 0.6147403308498941 | T | T | T |
| 0.6994618912183345 | 0.0517957222283301 | 0.4858493724516129 | T | T | T |
| 0.5986978183941483 | 0.0741518194655915 | 0.6117059804068222 | T | T | T |
| 0.6019063300330620 | 0.0514582460540648 | 0.8086903605398308 | T | T | T |
| 0.7291745037649441 | 0.0325685094886024 | 0.7710910991616744 | T | T | T |
| 0.8543982515871920 | 0.8264493821156232 | 0.7628119236367734 | T | T | T |
| 0.8021503285133457 | 0.8551165350952512 | 0.5879269763901516 | T | T | T |
| 0.6872547414076635 | 0.8521306889170855 | 0.4900971622839674 | T | T | T |
| 0.5855208564342088 | 0.8265174573798713 | 0.6119331505797849 | T | T | T |
| 0.6001252103628389 | 0.8515956468392830 | 0.8051035665352211 | T | T | T |
| 0.7267309456883644 | 0.8637011517185874 | 0.7509878797495895 | T | T | T |
| 0.8258396512925382 | 0.9513314536693485 | 0.7167095073212015 | T | T | T |
| 0.5793707360963043 | 0.9519878559094765 | 0.6778835788933317 | T | T | T |
| 0.9336398266440231 | 0.1253390576497366 | 0.9281696403352601 | T | T | T |
| 0.9160957781010113 | 0.9938117700969229 | 0.9382231195006890 | T | T | T |
| 0.8968845602712421 | 0.8622306378041196 | 0.9427600696229022 | T | T | T |

**Structure files (CONTCAR) involved in this work:**

|                    |                    |                    |   |   |   |
|--------------------|--------------------|--------------------|---|---|---|
| 0.6912751191931693 | 0.1324285143389088 | 0.8903245048448658 | T | T | T |
| 0.6815613299165718 | 0.0073688573312043 | 0.9538143702163061 | T | T | T |
| 0.6918238372418070 | 0.8740444153926308 | 0.9439090975573888 | T | T | T |
| 0.4878535361007388 | 0.0465173729863489 | 0.7167071446029435 | T | T | T |
| 0.4814485785112724 | 0.8664937718221232 | 0.7211079006388208 | T | T | T |
| 0.3575310061676064 | 0.4424898715404428 | 0.7107462345283460 | T | T | T |
| 0.3041743623252896 | 0.4286384098327872 | 0.8894572975210830 | T | T | T |
| 0.2072713080264665 | 0.4487606667182049 | 0.0238768922780314 | T | T | T |
| 0.1114314886220331 | 0.4293197165051425 | 0.8886811670167262 | T | T | T |
| 0.1058954150462465 | 0.4540725001213922 | 0.6914199910829789 | T | T | T |
| 0.2307195577033007 | 0.4701433902276817 | 0.7367680196981652 | T | T | T |
| 0.3553685324206955 | 0.6668636240554311 | 0.7293435929855441 | T | T | T |
| 0.3011076688602899 | 0.6679333237828370 | 0.9065393264888788 | T | T | T |
| 0.1922097812829909 | 0.6466727468585043 | 0.0138229605648287 | T | T | T |
| 0.0903254603833071 | 0.6758561764114064 | 0.8933320260679496 | T | T | T |
| 0.1014062006810690 | 0.6550081838497127 | 0.6981930961247672 | T | T | T |
| 0.2274904591120892 | 0.6356915413010703 | 0.7475088998885679 | T | T | T |
| 0.3203986270208110 | 0.5515062293466217 | 0.8147224640144856 | T | T | T |
| 0.0853635386375353 | 0.5523759464775834 | 0.8245492049570098 | T | T | T |
| 0.4319846736684771 | 0.3742948530203220 | 0.5815652676833666 | T | T | T |
| 0.4164476214705962 | 0.5045294361132429 | 0.5566002664324691 | T | T | T |
| 0.4112637392163919 | 0.6375378663405969 | 0.5558589376826393 | T | T | T |
| 0.1920065475850244 | 0.3726226642363012 | 0.6092749056430484 | T | T | T |
| 0.1879610681663111 | 0.5000820160626656 | 0.5516424243602912 | T | T | T |
| 0.1901516633313708 | 0.6343394355299081 | 0.5552054188693870 | T | T | T |
| 0.9974738877244972 | 0.4539725348505847 | 0.7921681713349991 | T | T | T |
| 0.9846818903796122 | 0.6343474577119421 | 0.7860561773018250 | T | T | T |
| 0.1453033039705377 | 0.5609870536035093 | 0.2079916612379067 | T | T | T |
| 0.2025667382871112 | 0.5696505980472961 | 0.3855090954129468 | T | T | T |
| 0.3012717066850364 | 0.5652399648811219 | 0.5226443793842038 | T | T | T |
| 0.3988878473912347 | 0.5715244622727356 | 0.3876347932987126 | T | T | T |
| 0.4027435372288335 | 0.5557865988367700 | 0.1929010989978085 | T | T | T |
| 0.2743945630027033 | 0.5337118653523528 | 0.2289925008171533 | T | T | T |
| 0.1393266113694555 | 0.3306862407165931 | 0.2427686959976363 | T | T | T |
| 0.1958866354437159 | 0.3419923905330814 | 0.4164951671572387 | T | T | T |
| 0.3082504812911798 | 0.3546587680493785 | 0.5200311229091067 | T | T | T |
| 0.4076726694849604 | 0.3285054475669673 | 0.3967435732957565 | T | T | T |
| 0.3951006168741776 | 0.3388933805607195 | 0.2005092753333373 | T | T | T |
| 0.2696949074462355 | 0.3560455461402647 | 0.2521714891345559 | T | T | T |
| 0.1826161397006635 | 0.4502852592617309 | 0.3025567086980316 | T | T | T |
| 0.4084640723233326 | 0.4489917664503614 | 0.3126142306459861 | T | T | T |
| 0.0692499976183629 | 0.6228266882627356 | 0.0737905109607396 | T | T | T |
| 0.0854975000317679 | 0.4917906819405341 | 0.0597966895317272 | T | T | T |
| 0.1086253557958999 | 0.3600782645353276 | 0.0545159502918877 | T | T | T |
| 0.3117600018155183 | 0.6255969301441976 | 0.0946962287110307 | T | T | T |
| 0.3284146692902760 | 0.4949977521690530 | 0.0568987176104559 | T | T | T |
| 0.3050851986375539 | 0.3620290528690819 | 0.0588508998566825 | T | T | T |
| 0.5123962076533508 | 0.5310530448551394 | 0.2996229503433859 | T | T | T |
| 0.5106839732204214 | 0.3651937647956165 | 0.2852061656165314 | T | T | T |
| 0.4405952547378820 | 0.7506317588753236 | 0.6447091582604768 | T | T | T |
| 0.1930211902812457 | 0.7487431232739785 | 0.6526798183690997 | T | T | T |
| 0.2726245210041224 | 0.7490233519579023 | 0.0572026365455872 | T | T | T |
| 0.1086365791876089 | 0.7487157933869050 | 0.0541016604814074 | T | T | T |

**Structure files (CONTCAR) involved in this work:**

|                    |                    |                    |   |   |   |
|--------------------|--------------------|--------------------|---|---|---|
| 0.0620542316863058 | 0.2495835903647947 | 0.1363131471405822 | T | T | T |
| 0.3042439793620121 | 0.2462824649236078 | 0.1514092999743522 | T | T | T |
| 0.2261609543285960 | 0.2514653852471818 | 0.5561340186345413 | T | T | T |
| 0.3897466256615503 | 0.2505135911499963 | 0.5538438227706926 | T | T | T |
| 0.5589000143376245 | 0.2512000031490278 | 0.3612225544328318 | T | T | T |
| 0.8041360692248466 | 0.2455254991053509 | 0.3520453795555786 | T | T | T |
| 0.7260692955161797 | 0.2499978801873026 | 0.9522118786703007 | T | T | T |
| 0.8897402614461732 | 0.2492233058576476 | 0.9500590382985830 | T | T | T |
| 0.9375083818157314 | 0.7484423371797679 | 0.8618221986248886 | T | T | T |
| 0.6874365701059889 | 0.7581783233991279 | 0.8612303031069926 | T | T | T |
| 0.7724409154125501 | 0.7502343625464328 | 0.4777677073533037 | T | T | T |
| 0.6043335450091509 | 0.7487065207809493 | 0.4544798528851697 | T | T | T |
| 0.9097646408235573 | 0.4439601218575611 | 0.6312376801720386 | T | T | T |
| 0.0386310366762199 | 0.5446036561546420 | 0.4842195783258568 | T | T | T |
| 0.9896155927877752 | 0.5648094421481733 | 0.5898694006353806 | T | T | T |
| 0.9510509131298578 | 0.5544387676650500 | 0.4702331983763666 | T | T | T |
| 0.8762460356754310 | 0.3905673693527887 | 0.4306719601641103 | T | T | T |
| 0.0272761808175690 | 0.4371997750484004 | 0.5746479740127364 | T | T | T |
| 0.9731002535231079 | 0.4314428500742826 | 0.4684585914979207 | T | T | T |
| 0.9900656355548544 | 0.5353390866154932 | 0.5203488743873619 | T | T | T |
| 0.9837800085135762 | 0.4594622323159588 | 0.5375419437114796 | T | T | T |

**Figure 4(c) Route(a)-Ga ④**

Si Al O Ga H C

1.0000000000000000

20.0219999999999985 0.0000000000000000 0.0000000000000000

0.0000000000000000 19.8990000000000009 0.0000000000000000

0.0000000000000000 0.0000000000000000 13.3829999999999991

93 3 192 1 6 2

Selective dynamics

Direct

|                    |                    |                    |   |   |   |
|--------------------|--------------------|--------------------|---|---|---|
| 0.4233754552401745 | 0.0559188833859226 | 0.6470688963268294 | T | T | T |
| 0.3023043764319880 | 0.0257348237795250 | 0.7882484572747196 | T | T | T |
| 0.2804791905242153 | 0.0598444399869762 | 0.0110742001979099 | T | T | T |
| 0.1209814195685623 | 0.0630159341671400 | 0.0115752024260815 | T | T | T |
| 0.0690905611814972 | 0.0288714362300672 | 0.7997111338311951 | T | T | T |
| 0.1775191454211257 | 0.0542820778067316 | 0.6498564079290892 | T | T | T |
| 0.4203033874588910 | 0.8266853754097827 | 0.6699342471845307 | T | T | T |
| 0.3029854917257669 | 0.8675799282342257 | 0.8097277427810764 | T | T | T |
| 0.2683138025216684 | 0.8280517719252274 | 0.0307165242056061 | T | T | T |
| 0.1134259592202187 | 0.8259028771640198 | 0.0183140479516718 | T | T | T |
| 0.0642304279513622 | 0.8705736833871340 | 0.8040586835352581 | T | T | T |
| 0.1803822421194850 | 0.8274941439324165 | 0.6726605577792620 | T | T | T |
| 0.0753984909467947 | 0.9428519098167233 | 0.1489156576664497 | T | T | T |
| 0.1966379313840322 | 0.9726132296690105 | 0.2922998182174525 | T | T | T |
| 0.2176284906497217 | 0.9361074274713986 | 0.5124461318481863 | T | T | T |
| 0.3771043185133074 | 0.9329769370512518 | 0.5144498771544012 | T | T | T |
| 0.4310055091227346 | 0.9698635567250523 | 0.3048021831118815 | T | T | T |
| 0.3216253579929385 | 0.9451103655244422 | 0.1544596494131283 | T | T | T |
| 0.0794921723379130 | 0.1720930842078626 | 0.1649795892640471 | T | T | T |
| 0.1965929778267101 | 0.1297680949883071 | 0.3080640699492306 | T | T | T |
| 0.2321039796862052 | 0.1724226443682726 | 0.5253103147986240 | T | T | T |
| 0.3867272743943166 | 0.1733190517954755 | 0.5128645641625380 | T | T | T |

**Structure files (CONTCAR) involved in this work:**

|                    |                    |                    |   |   |   |
|--------------------|--------------------|--------------------|---|---|---|
| 0.4365211506677518 | 0.1276412284807248 | 0.3024987053826457 | T | T | T |
| 0.3190329424185293 | 0.1666432059561929 | 0.1704066087109365 | T | T | T |
| 0.5832677547288992 | 0.5524927402330205 | 0.3541769404295156 | T | T | T |
| 0.6937600659891136 | 0.5290496321624691 | 0.1906599577844350 | T | T | T |
| 0.7177997017878573 | 0.5663800346385678 | 0.9773019132377984 | T | T | T |
| 0.8750420799925551 | 0.5670798465829499 | 0.9897755185115609 | T | T | T |
| 0.9335407588046847 | 0.5273213117433487 | 0.1884747688460842 | T | T | T |
| 0.5766822545005242 | 0.3296587279840154 | 0.3355628310292064 | T | T | T |
| 0.6985798512791350 | 0.3755107972421532 | 0.2017220609243090 | T | T | T |
| 0.7331373851469342 | 0.3276094651957192 | 0.9879793801614091 | T | T | T |
| 0.8853296710845796 | 0.3259322439187237 | 0.9893829859979942 | T | T | T |
| 0.9366037810956390 | 0.3717388587255209 | 0.1941658950783307 | T | T | T |
| 0.9313070491427483 | 0.4439715278678672 | 0.8679227461621329 | T | T | T |
| 0.7861233810755603 | 0.4360042892230661 | 0.5012313303114950 | T | T | T |
| 0.6269056335522455 | 0.4284895202792164 | 0.4959706846396306 | T | T | T |
| 0.5682953331571011 | 0.4692797475041224 | 0.7068616595208445 | T | T | T |
| 0.6729524618757562 | 0.4390377159497298 | 0.8557397372508455 | T | T | T |
| 0.9200255618036690 | 0.6743187981620635 | 0.8344004556499702 | T | T | T |
| 0.8034160339600176 | 0.6368715802705420 | 0.6934498226295412 | T | T | T |
| 0.7718432556759478 | 0.6712510261174836 | 0.4735964917039636 | T | T | T |
| 0.6163031954234313 | 0.6706825320909545 | 0.4883134352604991 | T | T | T |
| 0.5674351593908102 | 0.6276600489075090 | 0.7049625628299281 | T | T | T |
| 0.6848935028271291 | 0.6811690510086560 | 0.8246333510370085 | T | T | T |
| 0.5758651719486226 | 0.9431728753647803 | 0.3630312684259820 | T | T | T |
| 0.6948317737618488 | 0.9741777429195181 | 0.2194153394347550 | T | T | T |
| 0.7186689614807579 | 0.9420209979470739 | 0.9980761752567529 | T | T | T |
| 0.8782539401544786 | 0.9345258477018807 | 0.9947160032703082 | T | T | T |
| 0.9307573881384986 | 0.9710515979167345 | 0.2043159852302183 | T | T | T |
| 0.8204298674073986 | 0.9476196560468488 | 0.3553382902414383 | T | T | T |
| 0.5800890619668143 | 0.1744164026343229 | 0.3335783223332650 | T | T | T |
| 0.6962693590381717 | 0.1295744377822186 | 0.1958964846690774 | T | T | T |
| 0.7323155977417758 | 0.1719527454841218 | 0.9755731595106892 | T | T | T |
| 0.8868535771176852 | 0.1735786427850434 | 0.9896586704650338 | T | T | T |
| 0.9343949384789492 | 0.1287025366835093 | 0.2016213700325452 | T | T | T |
| 0.8174262459136519 | 0.1683842973334474 | 0.3323682910649667 | T | T | T |
| 0.9246649419768793 | 0.0566801273055209 | 0.8600890318713734 | T | T | T |
| 0.8044821668031100 | 0.0293690299845897 | 0.7185117042244542 | T | T | T |
| 0.7809296338253090 | 0.0639747468404285 | 0.4962711945408386 | T | T | T |
| 0.6212346669299219 | 0.0679233086547113 | 0.4927712929797404 | T | T | T |
| 0.5686805613582475 | 0.0311797320632393 | 0.7012245051595275 | T | T | T |
| 0.6782840623267682 | 0.0560231894361461 | 0.8536830858504399 | T | T | T |
| 0.9198037054554070 | 0.8271559106442521 | 0.8395593116316333 | T | T | T |
| 0.8038122378330286 | 0.8729587870806318 | 0.7004780504095723 | T | T | T |
| 0.7676044494647323 | 0.8308718622339497 | 0.4819326329973513 | T | T | T |
| 0.6131119075629005 | 0.8250873554308904 | 0.4942122045869031 | T | T | T |
| 0.5633137941491878 | 0.8745075650537506 | 0.7010845071398643 | T | T | T |
| 0.6794072068824490 | 0.8373738676834245 | 0.8359204132196623 | T | T | T |
| 0.4236544281769097 | 0.4451277918812778 | 0.6435085849208217 | T | T | T |
| 0.3036473961300641 | 0.4735089658734393 | 0.7903438017665203 | T | T | T |
| 0.2886263647814983 | 0.4339401842924597 | 0.0100905443226449 | T | T | T |
| 0.1318745964700781 | 0.4330281607216010 | 0.0100627805312979 | T | T | T |
| 0.0773233367893265 | 0.4725174061128243 | 0.8040109030170237 | T | T | T |
| 0.1806347270093385 | 0.4481658974185212 | 0.6484351041119418 | T | T | T |

**Structure files (CONTCAR) involved in this work:**

|                    |                    |                    |   |   |   |
|--------------------|--------------------|--------------------|---|---|---|
| 0.4252590565887022 | 0.6719261653430583 | 0.6657572146623287 | T | T | T |
| 0.3019329755111785 | 0.6302999984268350 | 0.8008511880495188 | T | T | T |
| 0.2709500191946427 | 0.6721286345222836 | 0.0203079533827596 | T | T | T |
| 0.1170428130789558 | 0.6730162781786805 | 0.0127276210889164 | T | T | T |
| 0.0666617253608284 | 0.6296073424595725 | 0.8038313344254667 | T | T | T |
| 0.1788235884920734 | 0.6691383466972919 | 0.6642756912899116 | T | T | T |
| 0.0801925248521764 | 0.5537588139333725 | 0.1411830536651537 | T | T | T |
| 0.2025520844784594 | 0.5275695669512140 | 0.2832816992083529 | T | T | T |
| 0.2217271262836146 | 0.5659642520337748 | 0.5070636734940049 | T | T | T |
| 0.3811934340462202 | 0.5685639959169504 | 0.5094932276001020 | T | T | T |
| 0.4313029946984139 | 0.5268081798985933 | 0.3021402362928911 | T | T | T |
| 0.3301740879158466 | 0.5529167987214224 | 0.1434882361469345 | T | T | T |
| 0.0835311284043029 | 0.3268078746404094 | 0.1590421800367156 | T | T | T |
| 0.1982735366142903 | 0.3689930395350376 | 0.3056454974055848 | T | T | T |
| 0.2323857873889839 | 0.3291518421592333 | 0.5271651406036041 | T | T | T |
| 0.3865172048190512 | 0.3266080453187114 | 0.5161886597001966 | T | T | T |
| 0.4319139208583542 | 0.3707648789075095 | 0.3015483835486869 | T | T | T |
| 0.3195089300479928 | 0.3248046745243449 | 0.1675970804605836 | T | T | T |
| 0.8220388328160932 | 0.3295559393379897 | 0.3266157047692337 | T | T | T |
| 0.8012500214488870 | 0.4742185101276279 | 0.7286042513444821 | T | T | T |
| 0.8112032836784367 | 0.5556757253070503 | 0.3397464010018678 | T | T | T |
| 0.3580928414882244 | 0.0612319981274314 | 0.7183499266347697 | T | T | T |
| 0.2999510405975266 | 0.0655100878989897 | 0.8939588223555781 | T | T | T |
| 0.2004384123785954 | 0.0501344278777742 | 0.0261004670687897 | T | T | T |
| 0.1018797501688502 | 0.0680751766005314 | 0.8943394648037244 | T | T | T |
| 0.1028664790070011 | 0.0556340204622506 | 0.6969245308652512 | T | T | T |
| 0.2293768391545230 | 0.0301701702730845 | 0.7359993887745025 | T | T | T |
| 0.3590622554064508 | 0.8255560575347295 | 0.7492136552454652 | T | T | T |
| 0.3045780684400582 | 0.8426368890283480 | 0.9246969677220090 | T | T | T |
| 0.1905498619577579 | 0.8518913233485026 | 0.0229651871417959 | T | T | T |
| 0.0864271576359242 | 0.8307417036499151 | 0.9045509565804514 | T | T | T |
| 0.1033090437176143 | 0.8383248012916267 | 0.7084915129402789 | T | T | T |
| 0.2294643582711771 | 0.8536557972830415 | 0.7617716674853703 | T | T | T |
| 0.3210250257497068 | 0.9470756438297082 | 0.8044618442150782 | T | T | T |
| 0.0838324890625255 | 0.9492509684756650 | 0.8147358718457752 | T | T | T |
| 0.4314897761302720 | 0.1251948178636638 | 0.5838639547344213 | T | T | T |
| 0.4173728253923221 | 0.9935902778724449 | 0.5689194730718450 | T | T | T |
| 0.3965583428996716 | 0.8618928588459458 | 0.5661951091063274 | T | T | T |
| 0.1950126165290151 | 0.1294238516357786 | 0.6115341982930270 | T | T | T |
| 0.1793197223271109 | 0.0017085912003238 | 0.5568774972538308 | T | T | T |
| 0.1941936356965492 | 0.8681128646093285 | 0.5695384391069034 | T | T | T |
| 0.9897750014643779 | 0.0441208444415355 | 0.7904810739530308 | T | T | T |
| 0.9841171071619772 | 0.8635263951962897 | 0.7877497806032545 | T | T | T |
| 0.1411429718417222 | 0.9399493632714935 | 0.2191918295419882 | T | T | T |
| 0.1983672631714447 | 0.9291696207232800 | 0.3951009433322648 | T | T | T |
| 0.2975509225578459 | 0.9469333271240874 | 0.5266938574541994 | T | T | T |
| 0.3977034158308593 | 0.9288072370998418 | 0.3975269116885019 | T | T | T |
| 0.3964075542480033 | 0.9466207436921474 | 0.2006891828566436 | T | T | T |
| 0.2696662034985467 | 0.9702947426228778 | 0.2400073232781340 | T | T | T |
| 0.1416494221307306 | 0.1694406602114346 | 0.2421441185143483 | T | T | T |
| 0.1949579667159636 | 0.1625117674895672 | 0.4187204013062912 | T | T | T |
| 0.3093404086110761 | 0.1477238890795860 | 0.5154169780601975 | T | T | T |
| 0.4140300477004169 | 0.1718518581354400 | 0.3989262006389982 | T | T | T |



**Structure files (CONTCAR) involved in this work:**

|                    |                    |                    |   |   |   |
|--------------------|--------------------|--------------------|---|---|---|
| 0.3961049584311168 | 0.1540950173637487 | 0.2043559866741187 | T | T | T |
| 0.2703919713018931 | 0.1386194852139267 | 0.2588622949269463 | T | T | T |
| 0.1775920513122780 | 0.0505578475336578 | 0.3150306818705573 | T | T | T |
| 0.4183726128949884 | 0.0495267326935972 | 0.3241829984856759 | T | T | T |
| 0.0673686397041091 | 0.8711051178324689 | 0.0919235411283460 | T | T | T |
| 0.0809375097953536 | 0.0015462373998013 | 0.0644783204337392 | T | T | T |
| 0.0990614388541412 | 0.1335722313385735 | 0.0623218257559435 | T | T | T |
| 0.3048666111700377 | 0.8688796874197207 | 0.1199015567493835 | T | T | T |
| 0.3181539124052795 | 0.9947296236912938 | 0.0580167361699334 | T | T | T |
| 0.3043822359560425 | 0.1284040781577912 | 0.0657411490824896 | T | T | T |
| 0.5100448243695797 | 0.9539584702028180 | 0.2941362135304708 | T | T | T |
| 0.5161965787141719 | 0.1362575266589631 | 0.2831663732657314 | T | T | T |
| 0.6383324190794393 | 0.5601654746085580 | 0.2670489930883488 | T | T | T |
| 0.6883167185088788 | 0.5742111058962887 | 0.0891603251422315 | T | T | T |
| 0.7973294834384835 | 0.5461217669554014 | 0.9811452646524267 | T | T | T |
| 0.8982823967824496 | 0.5751041651637679 | 0.1067935524914391 | T | T | T |
| 0.9008084343913291 | 0.5459274637298922 | 0.3016927066157703 | T | T | T |
| 0.7681645174296364 | 0.5343210270908428 | 0.2345922028228237 | T | T | T |
| 0.6372982342101816 | 0.3376565208014500 | 0.2578658120622721 | T | T | T |
| 0.7163035526934372 | 0.3282379469385188 | 0.1059101496065397 | T | T | T |
| 0.8100418927701398 | 0.3543724599796000 | 0.9703006286695052 | T | T | T |
| 0.9036357502156305 | 0.3249546476203830 | 0.1073662061955831 | T | T | T |
| 0.9049125331714090 | 0.3502067433416658 | 0.2993748108503059 | T | T | T |
| 0.7627347645942566 | 0.3799403424239000 | 0.2734843894376692 | T | T | T |
| 0.6751534924539034 | 0.4504037636537565 | 0.1658737243346962 | T | T | T |
| 0.9184340399642398 | 0.4497248729908058 | 0.1646663293947276 | T | T | T |
| 0.5734654117728631 | 0.6235712064896585 | 0.4123145336996726 | T | T | T |
| 0.6083003472248854 | 0.4958761760223837 | 0.4339325307456186 | T | T | T |
| 0.5943932695820480 | 0.3630847389180467 | 0.4432715107485062 | T | T | T |
| 0.8055384318559824 | 0.6374501479944568 | 0.3777486685880097 | T | T | T |
| 0.8068492410834458 | 0.5003028594968361 | 0.4391890153646183 | T | T | T |
| 0.8275909208967246 | 0.3667121216545973 | 0.4545091985694489 | T | T | T |
| 0.0121285704425868 | 0.5425870231366231 | 0.2063990476198783 | T | T | T |
| 0.0176479451701510 | 0.3670059443957190 | 0.1965404529001696 | T | T | T |
| 0.8718197368029552 | 0.4346192363722586 | 0.7858591635297431 | T | T | T |
| 0.8197460876317245 | 0.4354085930698496 | 0.6119794600625132 | T | T | T |
| 0.7079323993699154 | 0.4178704628388581 | 0.5005887215268656 | T | T | T |
| 0.5981869943980419 | 0.4326878113520541 | 0.6082394208277666 | T | T | T |
| 0.5983676547286818 | 0.4352149283297218 | 0.8069523845538817 | T | T | T |
| 0.7287592985490940 | 0.4391569169054509 | 0.7700808323065801 | T | T | T |
| 0.8645807281251677 | 0.6772042178950088 | 0.7473044496723212 | T | T | T |
| 0.8121267660537247 | 0.6485544365441350 | 0.5742395635058649 | T | T | T |
| 0.6938894204360672 | 0.6470805003940652 | 0.4865667771617079 | T | T | T |
| 0.5863161830171606 | 0.6636102904874845 | 0.6002282378523233 | T | T | T |
| 0.6077641066585426 | 0.6631379471006730 | 0.7962562894216024 | T | T | T |
| 0.7317994444579308 | 0.6697154065256594 | 0.7267024477581506 | T | T | T |
| 0.8071672963561407 | 0.5594593407353440 | 0.7258533255720535 | T | T | T |
| 0.5871534742339610 | 0.5486518926122981 | 0.7006853250995865 | T | T | T |
| 0.9382911546049623 | 0.3743746219470226 | 0.9309426640480061 | T | T | T |
| 0.9205055324226319 | 0.5074290613780708 | 0.9411287752357715 | T | T | T |
| 0.8913910795024860 | 0.6371177642629370 | 0.9340068950725230 | T | T | T |
| 0.6806839264496927 | 0.3738548918123609 | 0.9281232459807870 | T | T | T |
| 0.6766628601167931 | 0.5077744800316140 | 0.9213680596591304 | T | T | T |

**Structure files (CONTCAR) involved in this work:**

|                    |                    |                    |   |   |   |
|--------------------|--------------------|--------------------|---|---|---|
| 0.7104527648107125 | 0.6370921634288942 | 0.9188348265785113 | T | T | T |
| 0.4878889246728282 | 0.4599340576842708 | 0.7126894396148742 | T | T | T |
| 0.4873669689311320 | 0.6364661344325455 | 0.7240766765852757 | T | T | T |
| 0.6411493097001176 | 0.9376196731653890 | 0.2918442511819773 | T | T | T |
| 0.6979624677338928 | 0.9337401425811400 | 0.1143148914163855 | T | T | T |
| 0.7990437979686092 | 0.9499052123957145 | 0.9849575866585742 | T | T | T |
| 0.9001183159159233 | 0.9288284903304059 | 0.1109577424935547 | T | T | T |
| 0.8950900168185165 | 0.9484797947972747 | 0.3077395007436063 | T | T | T |
| 0.7684240511126533 | 0.9730610315314557 | 0.2701097866389136 | T | T | T |
| 0.6422031572655271 | 0.1745772137274571 | 0.2561557849794497 | T | T | T |
| 0.6969242759160378 | 0.1561268499627244 | 0.0816740523385647 | T | T | T |
| 0.8100824883399618 | 0.1472962588134616 | 0.9809085986716090 | T | T | T |
| 0.9104524173038748 | 0.1725649719620209 | 0.1054982101611592 | T | T | T |
| 0.8952990562825947 | 0.1536134183007688 | 0.3010540110436800 | T | T | T |
| 0.7701090551944719 | 0.1352586690715717 | 0.2454693935820902 | T | T | T |
| 0.6722059540823930 | 0.0514785735313553 | 0.1998987590901383 | T | T | T |
| 0.9183790299383766 | 0.0500941154713324 | 0.1803385288761225 | T | T | T |
| 0.5668709474098913 | 0.8733664977211152 | 0.4247942785174861 | T | T | T |
| 0.5815558857184002 | 0.0056788226502709 | 0.4410785091005510 | T | T | T |
| 0.6014903105523084 | 0.1377835392695973 | 0.4375004069165560 | T | T | T |
| 0.8027687053111473 | 0.8718887092344130 | 0.3911384333730609 | T | T | T |
| 0.8184728810525842 | 0.9982767854064190 | 0.4506454081118590 | T | T | T |
| 0.8037630390758481 | 0.1321826167766509 | 0.4399154459959430 | T | T | T |
| 0.0100810602022868 | 0.9558257194936743 | 0.2176861768812368 | T | T | T |
| 0.0144150353075582 | 0.1388437051596968 | 0.2182071222538774 | T | T | T |
| 0.8593505477928169 | 0.0655630592332147 | 0.7896353225597897 | T | T | T |
| 0.8015085181159765 | 0.0699184398469419 | 0.6133801110615726 | T | T | T |
| 0.7007610368674889 | 0.0536103400540799 | 0.4835915072667937 | T | T | T |
| 0.5996550281253368 | 0.0748726147742033 | 0.6093780674550171 | T | T | T |
| 0.6038818606835336 | 0.0518152814746060 | 0.8061098422538995 | T | T | T |
| 0.7310252827083363 | 0.0307968102901433 | 0.7694577525454281 | T | T | T |
| 0.8576323196863789 | 0.8287245319747217 | 0.7623752645972419 | T | T | T |
| 0.8052583099768552 | 0.8481140645356363 | 0.5859341473007770 | T | T | T |
| 0.6894733730876227 | 0.8531663334746696 | 0.4905304081736864 | T | T | T |
| 0.5863069812432594 | 0.8268297434116773 | 0.6087813296039796 | T | T | T |
| 0.6026319878722411 | 0.8515306736024811 | 0.8016387137268224 | T | T | T |
| 0.7294332940950689 | 0.8636277700565622 | 0.7477921230471285 | T | T | T |
| 0.8262879161605495 | 0.9514356955575042 | 0.7040096064829137 | T | T | T |
| 0.5811510475154303 | 0.9522511530852588 | 0.6753981994277345 | T | T | T |
| 0.9351645009003576 | 0.1259896414484686 | 0.9227691955219544 | T | T | T |
| 0.9181756353047795 | 0.9948410550058485 | 0.9387482797310975 | T | T | T |
| 0.8981579516382899 | 0.8635500571811578 | 0.9431464333120309 | T | T | T |
| 0.6939166052382950 | 0.1329425920715821 | 0.8859740339680711 | T | T | T |
| 0.6827802672593012 | 0.0087015157077891 | 0.9525937377302043 | T | T | T |
| 0.6937723613754263 | 0.8754772090969059 | 0.9402752360878752 | T | T | T |
| 0.4894465583641686 | 0.0461422316094611 | 0.7153746736435397 | T | T | T |
| 0.4832512396734270 | 0.8665748012026783 | 0.7191998673012499 | T | T | T |
| 0.3581373943275969 | 0.4429719335765672 | 0.7141440280581065 | T | T | T |
| 0.3037058271437296 | 0.4282915138533991 | 0.8913660492321142 | T | T | T |
| 0.2098543284832077 | 0.4508416900297177 | 0.0293711975409696 | T | T | T |
| 0.1156477292883007 | 0.4306938204309018 | 0.8912662192256501 | T | T | T |
| 0.1052247923478041 | 0.4524645916206319 | 0.6939049971170720 | T | T | T |
| 0.2307050005013268 | 0.4701750217676198 | 0.7377759278900400 | T | T | T |

**Structure files (CONTCAR) involved in this work:**

|                     |                    |                    |   |   |   |
|---------------------|--------------------|--------------------|---|---|---|
| 0.3586545073315527  | 0.6657005483545089 | 0.7336461488948371 | T | T | T |
| 0.3002191365112715  | 0.6686434983647782 | 0.9074835525701339 | T | T | T |
| 0.1936618995368525  | 0.6457767099627275 | 0.0206831170667124 | T | T | T |
| 0.0932406167520784  | 0.6744882540371253 | 0.8969236111013303 | T | T | T |
| 0.1022133581947013  | 0.6562038979978441 | 0.7017057698290887 | T | T | T |
| 0.2293980440367269  | 0.6366297961570148 | 0.7465451881631977 | T | T | T |
| 0.3195651684370824  | 0.5513760557388850 | 0.8182301164690368 | T | T | T |
| 0.0873497744669887  | 0.5519837957620305 | 0.8256837120199297 | T | T | T |
| 0.4328822768943926  | 0.3732170703794017 | 0.5874578836600652 | T | T | T |
| 0.4167984902643195  | 0.5029969224601433 | 0.5582706919531919 | T | T | T |
| 0.4119525306925739  | 0.6364139238042544 | 0.5580812221126897 | T | T | T |
| 0.1930961184042503  | 0.3714568119601261 | 0.6125455369467507 | T | T | T |
| 0.1877987584391748  | 0.4982146851898854 | 0.5530279686435128 | T | T | T |
| 0.1886465160101184  | 0.6327247151987456 | 0.5564449916392240 | T | T | T |
| -0.0013982082554725 | 0.4531553598058161 | 0.8017593177934638 | T | T | T |
| 0.9861605766133731  | 0.6351538887827780 | 0.7924928678055306 | T | T | T |
| 0.1425666157395253  | 0.5605257314708570 | 0.2174470112616979 | T | T | T |
| 0.2069044304759278  | 0.5683437906791141 | 0.3880580529313398 | T | T | T |
| 0.3012620346633068  | 0.5646253393358933 | 0.5307591012527545 | T | T | T |
| 0.3960808742830802  | 0.5701520922104419 | 0.3907959714744897 | T | T | T |
| 0.4030643813409803  | 0.5563090981056860 | 0.1967066880612069 | T | T | T |
| 0.2731553168735213  | 0.5335542478945634 | 0.2255212785190685 | T | T | T |
| 0.1389314387912018  | 0.3303806734922710 | 0.2471283792969890 | T | T | T |
| 0.1973931235185233  | 0.3417481899328372 | 0.4194368422699254 | T | T | T |
| 0.3097391886573490  | 0.3539522454130770 | 0.5229202499101756 | T | T | T |
| 0.4105344444065875  | 0.3294171247466805 | 0.4009522612281867 | T | T | T |
| 0.3958378459433538  | 0.3371165353117442 | 0.2046164754703471 | T | T | T |
| 0.2699540073213260  | 0.3543385028262100 | 0.2537432995137802 | T | T | T |
| 0.1838554581904798  | 0.4494263125993737 | 0.3046818144001940 | T | T | T |
| 0.4083767292947856  | 0.4485630047306678 | 0.3135528933064975 | T | T | T |
| 0.0703141500510840  | 0.6227046747692560 | 0.0781200085831244 | T | T | T |
| 0.0874434453981757  | 0.4910379889174341 | 0.0642808619325684 | T | T | T |
| 0.1131368080156585  | 0.3603118139769829 | 0.0571590813868342 | T | T | T |
| 0.3147381220946989  | 0.6257844080570560 | 0.0947986740620454 | T | T | T |
| 0.3321624550333084  | 0.4949833836514438 | 0.0576163495191782 | T | T | T |
| 0.3071185515179803  | 0.3625325633024739 | 0.0615080270038230 | T | T | T |
| 0.5117953977175038  | 0.5317824487028650 | 0.3056745295175233 | T | T | T |
| 0.5119253029701573  | 0.3664585496661804 | 0.2862313111698323 | T | T | T |
| 0.4416172371894832  | 0.7501746232970942 | 0.6444283410167529 | T | T | T |
| 0.1936253153035311  | 0.7484970814210795 | 0.6503426462176426 | T | T | T |
| 0.2740235037396607  | 0.7490586234620810 | 0.0591955848549112 | T | T | T |
| 0.1097755619307768  | 0.7484681920655749 | 0.0567649728677244 | T | T | T |
| 0.0642502634121667  | 0.2496313188327715 | 0.1353594730313394 | T | T | T |
| 0.3050972018614039  | 0.2457258683857590 | 0.1509617635327591 | T | T | T |
| 0.2277109517765138  | 0.2507142053255775 | 0.5578519482129334 | T | T | T |
| 0.3913903990936953  | 0.2496380148505219 | 0.5551275179332966 | T | T | T |
| 0.5598458143985547  | 0.2514052208411421 | 0.3577683794660837 | T | T | T |
| 0.8033880712920902  | 0.2469543930564599 | 0.3424224864834924 | T | T | T |
| 0.7282709926001354  | 0.2509234061296516 | 0.9477264736738736 | T | T | T |
| 0.8927698651348343  | 0.2499668696630114 | 0.9464906912222113 | T | T | T |
| 0.9398997848488171  | 0.7502622907762423 | 0.8664737814380113 | T | T | T |
| 0.6902718855643009  | 0.7587089432519948 | 0.8589687673889783 | T | T | T |
| 0.7739833335284501  | 0.7520438067778193 | 0.4592339343999455 | T | T | T |

**Structure files (CONTCAR) involved in this work:**

|                    |                    |                    |   |   |   |
|--------------------|--------------------|--------------------|---|---|---|
| 0.6087089108777536 | 0.7485717697404314 | 0.4530507175416873 | T | T | T |
| 0.8979104097077634 | 0.3641828656165896 | 0.6689280534371547 | T | T | T |
| 0.9898185871909232 | 0.4452671921304635 | 0.5114912211104929 | T | T | T |
| 0.8759978106164104 | 0.3731312342770146 | 0.4607388901153291 | T | T | T |
| 0.0455326955844913 | 0.4622007671852408 | 0.4035015847361970 | T | T | T |
| 0.0282372726623665 | 0.5850856819426277 | 0.4268035846418410 | T | T | T |
| 0.9710780276067859 | 0.5679348480104462 | 0.5336698535781118 | T | T | T |
| 0.9329397644553119 | 0.5399012981155518 | 0.3579469402869651 | T | T | T |
| 0.0127144275083091 | 0.4822509702624301 | 0.4615762971263430 | T | T | T |
| 0.0028488583428787 | 0.5482361762341980 | 0.4740525947941050 | T | T | T |

**Figure 5(a) TS-CH<sub>4</sub> as same as Figure 1(b) Zn/ZSM-5****Figure 5(a) TS-CH<sub>3</sub>OH same as Figure2(a) Zn-TS****Figure 5(a) TS1**

Si Al O Zn H C

1.0000000000000000

20.0219999999999985 0.0000000000000000 0.0000000000000000

0.0000000000000000 19.8990000000000009 0.0000000000000000

0.0000000000000000 0.0000000000000000 13.3829999999999991

93 3 193 2 6 2

Selective dynamics

Direct

|                    |                    |                    |   |   |   |
|--------------------|--------------------|--------------------|---|---|---|
| 0.4225003085793865 | 0.0600992539153168 | 0.6482480892415603 | T | T | T |
| 0.3052234000808174 | 0.0318617301749768 | 0.7923177212648842 | T | T | T |
| 0.2823962487775691 | 0.0559898295783903 | 0.0169692775398607 | T | T | T |
| 0.1233194367681815 | 0.0617434370857240 | 0.0116264443982596 | T | T | T |
| 0.0680697809753092 | 0.0314230718087522 | 0.8004854049413136 | T | T | T |
| 0.1805132415858145 | 0.0646656784412318 | 0.6648750647205428 | T | T | T |
| 0.4184979538818891 | 0.8271562054321522 | 0.6681597510384893 | T | T | T |
| 0.3010515985221630 | 0.8728197526340694 | 0.8007323388259501 | T | T | T |
| 0.2668740936231799 | 0.8302173361434048 | 0.0199554450760280 | T | T | T |
| 0.1111903460194948 | 0.8266357628049246 | 0.0120380129700209 | T | T | T |
| 0.0661857303552324 | 0.8748260700443700 | 0.7977828043990636 | T | T | T |
| 0.1793729199949756 | 0.8288177071608418 | 0.6644588067926064 | T | T | T |
| 0.0757946447720131 | 0.9404128223574572 | 0.1486150606819648 | T | T | T |
| 0.1948623581285154 | 0.9696033633962229 | 0.2900382526604084 | T | T | T |
| 0.2166034664276687 | 0.9436295981577667 | 0.5158739889572226 | T | T | T |
| 0.3768729332266922 | 0.9356465672407813 | 0.5134440264758253 | T | T | T |
| 0.4335364261687226 | 0.9682264935600542 | 0.3012598688456335 | T | T | T |
| 0.3204187737885001 | 0.9351962855556211 | 0.1641670740135122 | T | T | T |
| 0.0825080472933802 | 0.1715414639132183 | 0.1662344636581930 | T | T | T |
| 0.1979499245803660 | 0.1281727331031023 | 0.3018590886904763 | T | T | T |
| 0.2318408857830310 | 0.1689960132587705 | 0.5188156607121259 | T | T | T |
| 0.3873222655502395 | 0.1736040083761564 | 0.5083305380559621 | T | T | T |
| 0.4351201185514113 | 0.1267083665183049 | 0.2947769961541933 | T | T | T |
| 0.3182760662639728 | 0.1721086828134661 | 0.1666285278922516 | T | T | T |
| 0.5781073730113745 | 0.5552999097980570 | 0.3564053993752709 | T | T | T |
| 0.6905720869602942 | 0.5270269747312829 | 0.2031483908363591 | T | T | T |
| 0.7158617826345808 | 0.5684974375963702 | 0.9866198319934922 | T | T | T |
| 0.8746680025873748 | 0.5739118146894706 | 0.9859530003628777 | T | T | T |
| 0.8112151746104955 | 0.5496334516295005 | 0.3469031289349229 | T | T | T |
| 0.5728644028017306 | 0.3288163250483832 | 0.3324357174294441 | T | T | T |
| 0.6928294922058479 | 0.3730883966733608 | 0.1927118865816631 | T | T | T |
| 0.7308241145651904 | 0.3277268361279480 | 0.9799314107244086 | T | T | T |

**Structure files (CONTCAR) involved in this work:**

|                    |                    |                    |   |   |   |
|--------------------|--------------------|--------------------|---|---|---|
| 0.8856778213509027 | 0.3252689825080975 | 0.9929550559428425 | T | T | T |
| 0.9433295118576704 | 0.3728750434698566 | 0.1892217471295737 | T | T | T |
| 0.9196997683932384 | 0.4456491196231830 | 0.8619767289459944 | T | T | T |
| 0.8007537872602200 | 0.4735606113995415 | 0.7207021560673306 | T | T | T |
| 0.7780500425013721 | 0.4365985731038134 | 0.4973788195015674 | T | T | T |
| 0.6203728261096373 | 0.4278868339664612 | 0.4908604950846288 | T | T | T |
| 0.5690917425543894 | 0.4690589193301102 | 0.7028016224556308 | T | T | T |
| 0.6765500975844218 | 0.4479594544350702 | 0.8561943108392135 | T | T | T |
| 0.9205401471204022 | 0.6791327838386702 | 0.8292187810643132 | T | T | T |
| 0.7700657689814595 | 0.6687384465881329 | 0.4659341750141146 | T | T | T |
| 0.6147344375750368 | 0.6728775227382974 | 0.4886737236949408 | T | T | T |
| 0.5607814941143185 | 0.6274837004528229 | 0.6985661915475343 | T | T | T |
| 0.6721463897602614 | 0.6739080975678625 | 0.8281183306558946 | T | T | T |
| 0.5782178821647062 | 0.9450563440673926 | 0.3582586351370979 | T | T | T |
| 0.6986498021130870 | 0.9740017353286569 | 0.2148124234489774 | T | T | T |
| 0.7195326283373248 | 0.9379077360767359 | 0.9928514533966700 | T | T | T |
| 0.8795722737866162 | 0.9342728603218213 | 0.9948298500444014 | T | T | T |
| 0.9311315475014766 | 0.9708959941824531 | 0.2048930697149773 | T | T | T |
| 0.8224925447255167 | 0.9463834703001834 | 0.3549437255936396 | T | T | T |
| 0.5777383386045278 | 0.1736952488028259 | 0.3292473121498065 | T | T | T |
| 0.6979713846580062 | 0.1323496307193979 | 0.1934975097764536 | T | T | T |
| 0.7319752227124019 | 0.1715823347427640 | 0.9720640972117168 | T | T | T |
| 0.8866457086982349 | 0.1733239500978696 | 0.9824503570266001 | T | T | T |
| 0.9355697084439583 | 0.1289962138181423 | 0.1966922671582536 | T | T | T |
| 0.8203813881398123 | 0.1742295038558651 | 0.3305275168618994 | T | T | T |
| 0.9231016184124504 | 0.0541566943979294 | 0.8554965325047843 | T | T | T |
| 0.8017667950945488 | 0.0263251574708775 | 0.7089984316792373 | T | T | T |
| 0.7810998827147746 | 0.0662332882037809 | 0.4913203539847232 | T | T | T |
| 0.6207620471392987 | 0.0698336970643759 | 0.4899065894707618 | T | T | T |
| 0.5679061917084867 | 0.0321445551462358 | 0.6988471611611682 | T | T | T |
| 0.6784294201899987 | 0.0538990917843219 | 0.8491733176414011 | T | T | T |
| 0.9237641645255258 | 0.8313947616503616 | 0.8368263408465403 | T | T | T |
| 0.8026327617289364 | 0.8689920387241294 | 0.6953786411009080 | T | T | T |
| 0.7703285667544847 | 0.8262473978195557 | 0.4782187233032194 | T | T | T |
| 0.6153085519411625 | 0.8264775712644835 | 0.4900262932168726 | T | T | T |
| 0.5636549163382102 | 0.8748750615334737 | 0.6975870682866622 | T | T | T |
| 0.6782692438597080 | 0.8328733799767497 | 0.8329047294766776 | T | T | T |
| 0.4228412945942480 | 0.4416203176261957 | 0.6465281882820406 | T | T | T |
| 0.3040946387283668 | 0.4691459666906730 | 0.7889110496378331 | T | T | T |
| 0.2790838450295285 | 0.4453481630919409 | 0.0160007755644995 | T | T | T |
| 0.1208630004146055 | 0.4379750872456933 | 0.0163989188087949 | T | T | T |
| 0.0634142052272172 | 0.4691138482835439 | 0.8017677788692932 | T | T | T |
| 0.1765226972679108 | 0.4356218859728145 | 0.6628388997055250 | T | T | T |
| 0.4152146693697955 | 0.6733271227076597 | 0.6662363075244252 | T | T | T |
| 0.3004902103233393 | 0.6277113228767986 | 0.8007802246201057 | T | T | T |
| 0.2665731560618761 | 0.6687870308760405 | 0.0194078266982961 | T | T | T |
| 0.1112920318649209 | 0.6726348128152940 | 0.0077737282750128 | T | T | T |
| 0.0621817385022820 | 0.6280767948556141 | 0.7930966965706855 | T | T | T |
| 0.1793601294768343 | 0.6716995517453777 | 0.6642609583959048 | T | T | T |
| 0.0775837203190435 | 0.5599221836646059 | 0.1494713167896971 | T | T | T |
| 0.1959247320032131 | 0.5287496954554045 | 0.2900535946597456 | T | T | T |
| 0.2140647002429592 | 0.5555763207527626 | 0.5164318669036841 | T | T | T |
| 0.3730357589733518 | 0.5648728111456068 | 0.5149214516901575 | T | T | T |

**Structure files (CONTCAR) involved in this work:**

|                    |                    |                    |   |   |   |
|--------------------|--------------------|--------------------|---|---|---|
| 0.4297001969227658 | 0.5310389779563993 | 0.3045837316751754 | T | T | T |
| 0.3210492570168634 | 0.5634209652514475 | 0.1628404287767759 | T | T | T |
| 0.0866289449777005 | 0.3236605866710620 | 0.1622399703733751 | T | T | T |
| 0.1988517989898576 | 0.3706530447125555 | 0.3005247323087547 | T | T | T |
| 0.2300922578592510 | 0.3303696417479842 | 0.5189305115869418 | T | T | T |
| 0.3850541196281351 | 0.3277693090335491 | 0.5066376336033337 | T | T | T |
| 0.4305452703999331 | 0.3740051542821559 | 0.2931894591329027 | T | T | T |
| 0.3170874825683740 | 0.3295765524143391 | 0.1634160424843382 | T | T | T |
| 0.9223830164699600 | 0.5278927804610137 | 0.1935605075674268 | T | T | T |
| 0.8212545199821506 | 0.3359932119487802 | 0.3263233015137013 | T | T | T |
| 0.7984000468423413 | 0.6364709353515043 | 0.6964335139443324 | T | T | T |
| 0.0102214696645661 | 0.5577003489321420 | 0.2274587101809490 | T | T | T |
| 0.3587535955378632 | 0.0704705911831570 | 0.7217541226707661 | T | T | T |
| 0.3169198136508887 | 0.0546188482291726 | 0.9072372555471647 | T | T | T |
| 0.2024684223999783 | 0.0454857534726561 | 0.0062887553145413 | T | T | T |
| 0.0926136667592954 | 0.0701265363643773 | 0.9006280796984774 | T | T | T |
| 0.1037333129616573 | 0.0649857438444568 | 0.7035643810972123 | T | T | T |
| 0.2295038288253726 | 0.0516577434634072 | 0.7600607639754956 | T | T | T |
| 0.3598931503746173 | 0.8278479015795323 | 0.7519352900152017 | T | T | T |
| 0.3009300633348477 | 0.8605691769780065 | 0.9200091085996446 | T | T | T |
| 0.1883968613862242 | 0.8512533983764961 | 0.0225922665316682 | T | T | T |
| 0.0879275896101154 | 0.8328480258152667 | 0.8967206282961997 | T | T | T |
| 0.1026523114340563 | 0.8411637578775332 | 0.7009689826285991 | T | T | T |
| 0.2288450549704376 | 0.8509263490984742 | 0.7554573988817432 | T | T | T |
| 0.3159940441345553 | 0.9514063611152047 | 0.7771811711332235 | T | T | T |
| 0.0897256453178833 | 0.9526190726736317 | 0.8090624764899974 | T | T | T |
| 0.4328400648254326 | 0.1275975572258370 | 0.5815123826217833 | T | T | T |
| 0.4121515377079289 | 0.9964756126671506 | 0.5740568005368983 | T | T | T |
| 0.3926348408643272 | 0.8644767880067051 | 0.5675098782635535 | T | T | T |
| 0.1967713738568642 | 0.1378950907835399 | 0.6174422590813214 | T | T | T |
| 0.1895147252796173 | 0.0057041010279052 | 0.5825182784760012 | T | T | T |
| 0.1946834667016559 | 0.8721249636723341 | 0.5643965054060863 | T | T | T |
| 0.9880463922583771 | 0.0393056166620961 | 0.7862392439534542 | T | T | T |
| 0.9856188657748897 | 0.8717584060732229 | 0.7842176193862240 | T | T | T |
| 0.1401640418573833 | 0.9312895658740075 | 0.2212148978740471 | T | T | T |
| 0.1833200229205374 | 0.9488062627953180 | 0.4056809792401385 | T | T | T |
| 0.2971228678096369 | 0.9486140663943375 | 0.5084667560165139 | T | T | T |
| 0.4073218584244950 | 0.9314550541261707 | 0.4019401011664493 | T | T | T |
| 0.3966239958727780 | 0.9350831209102859 | 0.2050375238182506 | T | T | T |
| 0.2700307211762789 | 0.9478955968255656 | 0.2578654957063435 | T | T | T |
| 0.1391120587214601 | 0.1729880507163365 | 0.2529623958815107 | T | T | T |
| 0.1948505036575602 | 0.1375330410287449 | 0.4217355357050792 | T | T | T |
| 0.3102112638032970 | 0.1479511253129337 | 0.5152265642104034 | T | T | T |
| 0.4132954191612483 | 0.1680846027646254 | 0.3941510680454833 | T | T | T |
| 0.3954989810315360 | 0.1581197961640448 | 0.1990206463591286 | T | T | T |
| 0.2706672489214894 | 0.1527554660253397 | 0.2614356902605797 | T | T | T |
| 0.1854631531899614 | 0.0499712493093854 | 0.2725659999533950 | T | T | T |
| 0.4156078843984859 | 0.0479451975066793 | 0.3078622948978314 | T | T | T |
| 0.0646840623147484 | 0.8713373933088914 | 0.0856106822781129 | T | T | T |
| 0.0855608418280922 | 0.0010204117351131 | 0.0690110539620552 | T | T | T |
| 0.1106176735685208 | 0.1317505219476114 | 0.0695768283940602 | T | T | T |
| 0.3049696608971846 | 0.8620139851164553 | 0.1156158022527555 | T | T | T |
| 0.3124579358009576 | 0.9944444165415062 | 0.0819524263627812 | T | T | T |

**Structure files (CONTCAR) involved in this work:**

|                    |                    |                    |   |   |   |
|--------------------|--------------------|--------------------|---|---|---|
| 0.2987069054648780 | 0.1277653177968524 | 0.0692081372240948 | T | T | T |
| 0.5131185561594556 | 0.9560662415131019 | 0.2877440201768932 | T | T | T |
| 0.5151866897915731 | 0.1339458287138127 | 0.2776897795056465 | T | T | T |
| 0.6364643712186530 | 0.5640676137605792 | 0.2741821451589002 | T | T | T |
| 0.7013620663446668 | 0.5739917430998831 | 0.1056703384743848 | T | T | T |
| 0.7952927660036633 | 0.5617718089439721 | 0.9630457999022641 | T | T | T |
| 0.8902011169137192 | 0.5794146473208099 | 0.1033726477186983 | T | T | T |
| 0.8858104588935930 | 0.5323231282939996 | 0.3110263400384004 | T | T | T |
| 0.7603989907170656 | 0.5218666258591156 | 0.2639873007937707 | T | T | T |
| 0.6382297030790178 | 0.3355916315316200 | 0.2633392871053125 | T | T | T |
| 0.6905672386786111 | 0.3358831873510296 | 0.0841486096055467 | T | T | T |
| 0.8084203265070958 | 0.3508157668353012 | 0.9948097922342714 | T | T | T |
| 0.9145375687106413 | 0.3202367538941583 | 0.1064662378170198 | T | T | T |
| 0.9052294701081546 | 0.3593186671383143 | 0.2957536820232585 | T | T | T |
| 0.7655477186533587 | 0.3695553222816169 | 0.2422398778418778 | T | T | T |
| 0.6680130591704367 | 0.4509899366921505 | 0.1758253281326432 | T | T | T |
| 0.9334483690400165 | 0.4481665959117625 | 0.1506432825077669 | T | T | T |
| 0.5694697962191185 | 0.6256654492282339 | 0.4165034273744441 | T | T | T |
| 0.5952567293809443 | 0.4963437925708811 | 0.4366030953463135 | T | T | T |
| 0.5843804737588610 | 0.3628786557183743 | 0.4419818749941974 | T | T | T |
| 0.8010315495733394 | 0.6296966651155349 | 0.3691562390820269 | T | T | T |
| 0.7953459102484943 | 0.5137843969471393 | 0.4573393725443499 | T | T | T |
| 0.8276399638783628 | 0.3851545076097462 | 0.4392976902984284 | T | T | T |
| 0.0223785041613935 | 0.3598729204500559 | 0.2112734327819657 | T | T | T |
| 0.8538744981043197 | 0.4355843733221743 | 0.7920237801306799 | T | T | T |
| 0.7955121809922377 | 0.4332612933230340 | 0.6151420813115053 | T | T | T |
| 0.7007475410123537 | 0.4198061237837456 | 0.4745462138196620 | T | T | T |
| 0.6031835646971269 | 0.4298354587879210 | 0.6089154972758620 | T | T | T |
| 0.6026036626727070 | 0.4440642538389851 | 0.8067585242662569 | T | T | T |
| 0.7275334747477409 | 0.4755359483253354 | 0.7705543006201193 | T | T | T |
| 0.8592249324928226 | 0.6826981720209331 | 0.7534272590956158 | T | T | T |
| 0.8144825479546481 | 0.6452216681274981 | 0.5638424737966324 | T | T | T |
| 0.6924945533265620 | 0.6475192474450673 | 0.4852631457846644 | T | T | T |
| 0.5865131448442503 | 0.6689833368767757 | 0.6015203274543509 | T | T | T |
| 0.5937872211221036 | 0.6602178617729427 | 0.7982181601427742 | T | T | T |
| 0.7186072451325365 | 0.6484897083167533 | 0.7372843077288164 | T | T | T |
| 0.8257415192308575 | 0.5502826850446028 | 0.6963925245743707 | T | T | T |
| 0.5812082604220847 | 0.5489465755242620 | 0.6863201636556057 | T | T | T |
| 0.9300285633465889 | 0.3775018556877888 | 0.9272303635578172 | T | T | T |
| 0.9141282398550558 | 0.5108315729867055 | 0.9337971854747089 | T | T | T |
| 0.9005185140793263 | 0.6428588557516862 | 0.9338070506661968 | T | T | T |
| 0.6973527310589674 | 0.3734779800050756 | 0.8930010278486311 | T | T | T |
| 0.6773285816668646 | 0.5010421503503918 | 0.9480478007808452 | T | T | T |
| 0.6870119724871423 | 0.6351868327528486 | 0.9329694694803058 | T | T | T |
| 0.4901357320833050 | 0.4515075423217637 | 0.7117031104029417 | T | T | T |
| 0.4798669873812973 | 0.6325333795209596 | 0.7069320396367470 | T | T | T |
| 0.6438224148644199 | 0.9400981083207587 | 0.2880956553587223 | T | T | T |
| 0.6988258087258371 | 0.9333889622578829 | 0.1097218757546329 | T | T | T |
| 0.7999549131240687 | 0.9453066548869630 | 0.9797601732080513 | T | T | T |
| 0.8984692310776815 | 0.9292432402226531 | 0.1123844109395619 | T | T | T |
| 0.8977731036246981 | 0.9480728760875224 | 0.3100083057533036 | T | T | T |
| 0.7719065369202706 | 0.9675576278983792 | 0.2654881766421455 | T | T | T |
| 0.6405601436350197 | 0.1733151111585637 | 0.2533301820958122 | T | T | T |

**Structure files (CONTCAR) involved in this work:**

|                    |                    |                    |   |   |   |
|--------------------|--------------------|--------------------|---|---|---|
| 0.6961587360087216 | 0.1577528862455117 | 0.0786347402259065 | T | T | T |
| 0.8095903411784414 | 0.1471203444950638 | 0.9783769055064638 | T | T | T |
| 0.9136473961922774 | 0.1687387012957302 | 0.0961874723598673 | T | T | T |
| 0.8970415732449943 | 0.1589368943157885 | 0.2934492377395752 | T | T | T |
| 0.7708341453811075 | 0.1459091511146741 | 0.2422951928433809 | T | T | T |
| 0.6804755152533868 | 0.0525492342707787 | 0.1974493699085534 | T | T | T |
| 0.9181043861244907 | 0.0499355625734501 | 0.1831689899046128 | T | T | T |
| 0.5702018696713590 | 0.8749281817830689 | 0.4196753689621453 | T | T | T |
| 0.5826436233816399 | 0.0066943820387812 | 0.4378097611370063 | T | T | T |
| 0.5983137658039897 | 0.1390106028303552 | 0.4349769027537814 | T | T | T |
| 0.8084118397270523 | 0.8705794799430748 | 0.3944663051177144 | T | T | T |
| 0.8161634135451724 | 0.9985840162822339 | 0.4474662813610002 | T | T | T |
| 0.8067964320362967 | 0.1325993463002852 | 0.4336664737211062 | T | T | T |
| 0.0103401489612420 | 0.9548005343531637 | 0.2160641659106352 | T | T | T |
| 0.0157810688953928 | 0.1373976415069010 | 0.2125444561854818 | T | T | T |
| 0.8575039131042123 | 0.0552454078552299 | 0.7851219415617978 | T | T | T |
| 0.8013945872024046 | 0.0722509164795907 | 0.6086682154314006 | T | T | T |
| 0.7005818283146483 | 0.0583514045646510 | 0.4789395106392458 | T | T | T |
| 0.5992373254409422 | 0.0754246371958519 | 0.6066906765990476 | T | T | T |
| 0.6033027252983760 | 0.0518557626099195 | 0.8038231116651354 | T | T | T |
| 0.7288514450465299 | 0.0294125341929337 | 0.7614082949478195 | T | T | T |
| 0.8597957607684964 | 0.8352723330809835 | 0.7636800367824934 | T | T | T |
| 0.8054828667325946 | 0.8326837882471383 | 0.5869157282098810 | T | T | T |
| 0.6929573803555289 | 0.8510031025139826 | 0.4857262612256708 | T | T | T |
| 0.5888715272492310 | 0.8290049010290079 | 0.6044932975468832 | T | T | T |
| 0.6026102765584391 | 0.8526818135882549 | 0.7987401562761534 | T | T | T |
| 0.7295341592211303 | 0.8578601965468485 | 0.7455862162760875 | T | T | T |
| 0.8176780045117951 | 0.9485802101950724 | 0.6809283548823409 | T | T | T |
| 0.5787738212882160 | 0.9531380949138353 | 0.6722259758954124 | T | T | T |
| 0.9319175410490155 | 0.1271178574584042 | 0.9087201581609867 | T | T | T |
| 0.9181331210320359 | 0.9971158146529641 | 0.9425091557636068 | T | T | T |
| 0.9041981122627457 | 0.8645402887287541 | 0.9439255741323299 | T | T | T |
| 0.6945653402911059 | 0.1301292526115164 | 0.8840778861596822 | T | T | T |
| 0.6836925764142880 | 0.0037543827345614 | 0.9447355764766923 | T | T | T |
| 0.6949725825179831 | 0.8696179470600246 | 0.9382149218017287 | T | T | T |
| 0.4890591976356546 | 0.0482251097244603 | 0.7145315558675390 | T | T | T |
| 0.4839956728195452 | 0.8639015272265124 | 0.7144937671788358 | T | T | T |
| 0.3597250356964506 | 0.4307667404998827 | 0.7216254526034719 | T | T | T |
| 0.3105804203005333 | 0.4456051319184548 | 0.9044268591251954 | T | T | T |
| 0.1989305980885720 | 0.4605626752218406 | 0.0138580647430041 | T | T | T |
| 0.0901092759753214 | 0.4363855290289860 | 0.9054075264895544 | T | T | T |
| 0.1014081417271538 | 0.4338638597270839 | 0.7081461523126008 | T | T | T |
| 0.2290089334196203 | 0.4504809959722559 | 0.7526361997154091 | T | T | T |
| 0.3584427097908711 | 0.6742494250489909 | 0.7529934640898185 | T | T | T |
| 0.3015017375504334 | 0.6379444683925216 | 0.9204998444528680 | T | T | T |
| 0.1880967991478831 | 0.6470886205100820 | 0.0183768423190468 | T | T | T |
| 0.0865043585828303 | 0.6671202873782172 | 0.8935250605195970 | T | T | T |
| 0.1021796987018181 | 0.6591348250514836 | 0.6976195085163542 | T | T | T |
| 0.2276990152326404 | 0.6490082518465188 | 0.7565106249872038 | T | T | T |
| 0.3160689068091008 | 0.5494903807265751 | 0.7751191948317022 | T | T | T |
| 0.0804508540867254 | 0.5489206894034725 | 0.8036025813917296 | T | T | T |
| 0.4316054161646112 | 0.3758376504190858 | 0.5755164747634930 | T | T | T |
| 0.4131300673525312 | 0.5070928203816546 | 0.5754948453179689 | T | T | T |



**Structure files (CONTCAR) involved in this work:**

|                     |                    |                    |   |   |   |
|---------------------|--------------------|--------------------|---|---|---|
| 0.3841079266836434  | 0.6375879505407968 | 0.5671329436293149 | T | T | T |
| 0.1920008407692296  | 0.3623832050546480 | 0.6146528610155408 | T | T | T |
| 0.1805426383115353  | 0.4946495829622310 | 0.5790595302743906 | T | T | T |
| 0.1955379171711129  | 0.6280893112402953 | 0.5643510839107134 | T | T | T |
| 0.9841725244721929  | 0.4551934415254772 | 0.7888689413241028 | T | T | T |
| 0.9827526128590870  | 0.6380208499476361 | 0.7764331772207146 | T | T | T |
| 0.1425292755804483  | 0.5691299663915664 | 0.2197839136550958 | T | T | T |
| 0.1831614378890437  | 0.5531652448998826 | 0.4038401646763787 | T | T | T |
| 0.2942497410652303  | 0.5452748486578720 | 0.5131246367905288 | T | T | T |
| 0.4014472178517476  | 0.5700787043343239 | 0.4021736995803483 | T | T | T |
| 0.3969013168165832  | 0.5648868640341067 | 0.2052122221559407 | T | T | T |
| 0.2711824857889528  | 0.5473929945933490 | 0.2565570577319551 | T | T | T |
| 0.1451221202699993  | 0.3226303739400690 | 0.2461119579186670 | T | T | T |
| 0.1940646999530073  | 0.3602648782469449 | 0.4198184192517246 | T | T | T |
| 0.3080143886035600  | 0.3531904610699915 | 0.5186081263911159 | T | T | T |
| 0.4070305510893265  | 0.3307213739449801 | 0.3901068580738803 | T | T | T |
| 0.3944194181765203  | 0.3454950708480710 | 0.1924966775865586 | T | T | T |
| 0.2730411004804372  | 0.3512789375519387 | 0.2611482239121565 | T | T | T |
| 0.1816310629772907  | 0.4490191554073212 | 0.2749859584077403 | T | T | T |
| 0.4092122690305184  | 0.4520022931366357 | 0.3111498776901842 | T | T | T |
| 0.0656108598457650  | 0.6251169704992687 | 0.0802240033430859 | T | T | T |
| 0.0787226506872149  | 0.4918286672011313 | 0.0850439493946001 | T | T | T |
| 0.1130211536811632  | 0.3636709745495889 | 0.0637414660379608 | T | T | T |
| 0.3027534576745153  | 0.6365374922536718 | 0.1166553307690085 | T | T | T |
| 0.3146462820905951  | 0.5049013137538060 | 0.0791504312757399 | T | T | T |
| 0.2934792171165823  | 0.3724452374600587 | 0.0662086620382354 | T | T | T |
| 0.5098054845430592  | 0.5383197975128623 | 0.2970150322180880 | T | T | T |
| 0.5104942726918663  | 0.3665568538261562 | 0.2774921596473919 | T | T | T |
| 0.4356323469839726  | 0.7499122376092306 | 0.6388634629917727 | T | T | T |
| 0.1908028286620616  | 0.7501664573342902 | 0.6368099518406948 | T | T | T |
| 0.2746011068276159  | 0.7493512651330263 | 0.0229616252761962 | T | T | T |
| 0.1039341658190646  | 0.7489276458593955 | 0.0473385391743526 | T | T | T |
| 0.0680063441243593  | 0.2478208172445761 | 0.1295098692439466 | T | T | T |
| 0.3077166455522016  | 0.2506379679986446 | 0.1373071724934615 | T | T | T |
| 0.2232917015000827  | 0.2497094682176348 | 0.5218348659098565 | T | T | T |
| 0.3925123410607846  | 0.2510168757447972 | 0.5454650039698564 | T | T | T |
| 0.5551748976347465  | 0.2504328559527926 | 0.3515657582423457 | T | T | T |
| 0.8099386215460441  | 0.2524563298213219 | 0.3509422802296769 | T | T | T |
| 0.7271199208201464  | 0.2503401512867550 | 0.9426272152416643 | T | T | T |
| 0.8911828478232372  | 0.2506926140240272 | 0.9439383912974075 | T | T | T |
| 0.9467041070737795  | 0.7545620389620551 | 0.8565726143833953 | T | T | T |
| 0.6839177758869938  | 0.7531211897984926 | 0.8506686807256564 | T | T | T |
| 0.7756667659415682  | 0.7482367562583903 | 0.4438273471311224 | T | T | T |
| 0.6094689230657816  | 0.7498309178958730 | 0.4492898347890085 | T | T | T |
| 0.9356290212875614  | 0.5033028871561115 | 0.5103766188448233 | T | T | T |
| 0.9277333553020213  | 0.4163642773504437 | 0.4222211777514082 | T | T | T |
| 0.8760528422318926  | 0.5623023612484229 | 0.5638063329493627 | T | T | T |
| 0.9900299505045339  | 0.4716706522102708 | 0.5083183701097128 | T | T | T |
| 0.0614133502916240  | 0.4419539440204030 | 0.4080838380173202 | T | T | T |
| 0.0489651971991859  | 0.3835141356614213 | 0.5096675959641767 | T | T | T |
| -0.0031038933883626 | 0.5725369962818779 | 0.3811246369727465 | T | T | T |
| 0.9774241336627753  | 0.6442918246694955 | 0.3037411551603378 | T | T | T |
| 0.0632682439788116  | 0.6214914083272302 | 0.3256883488445550 | T | T | T |

**Structure files (CONTCAR) involved in this work:**

0.0257906493507005 0.4225902884910110 0.4634815352393614 T T T  
0.0122833326119669 0.6026711437531874 0.3165072797333707 T T T

**Figure 5(a) TS2**

Si Al O Zn H C

1.0000000000000000

20.0219999999999985 0.0000000000000000 0.0000000000000000

0.0000000000000000 19.8990000000000009 0.0000000000000000

0.0000000000000000 0.0000000000000000 13.3829999999999991

93 3 193 2 6 2

Selective dynamics

Direct

0.4232624577637601 0.0612423545797371 0.6470390086939215 T T T

0.3053677306395476 0.0320172323904512 0.7897810078803401 T T T

0.2833816660765149 0.0552305805138127 0.0153179824918334 T T T

0.1243149176965803 0.0620737676083339 0.0111924219254794 T T T

0.0684146553371393 0.0316194202613569 0.8003643535437838 T T T

0.1802919333569585 0.0659336304274008 0.6640156088028099 T T T

0.4178868320322678 0.8281484285172988 0.6662987531111892 T T T

0.3003685473097897 0.8733215211097856 0.7979567895839997 T T T

0.2671886454918623 0.8309612374894593 0.0174457696972213 T T T

0.1112290754722212 0.8263262311484847 0.0112733154312302 T T T

0.0666081179760916 0.8749941294536838 0.7968386480149473 T T T

0.1788663387577776 0.8288714112231355 0.6616519953495988 T T T

0.0761543188785243 0.9406608808054230 0.1478302598679732 T T T

0.1954294768230365 0.9698454396191378 0.2886160463900917 T T T

0.2166484415025970 0.9449063088474411 0.5150391909264491 T T T

0.3767645914002322 0.9373997641664601 0.5122581399589450 T T T

0.4338661726797366 0.9691849453852510 0.2999631502495325 T T T

0.3209697730077672 0.9346408922718710 0.1634452157365570 T T T

0.0830056105190606 0.1720027242757798 0.1648574050456108 T T T

0.1989326352386614 0.1283410657922492 0.2987834095621793 T T T

0.2315599291935477 0.1698331708084067 0.5165042932135190 T T T

0.3877024878746696 0.1748939414350912 0.5074837533360506 T T T

0.4351989876715072 0.1278352036406231 0.2931611121066049 T T T

0.3191472102537409 0.1726198758943357 0.1625896783762767 T T T

0.5766331839434615 0.5557934839601452 0.3537030480324269 T T T

0.6905270877601758 0.5278397087322878 0.2014090080639011 T T T

0.7133852080001848 0.5695576245205333 0.9847013213514466 T T T

0.8718219174388073 0.5741515218648381 0.9878781230636230 T T T

0.8107319430497476 0.5507071392388868 0.3479931115496900 T T T

0.5723922534220054 0.3303852171544561 0.3332749952620143 T T T

0.6946220317498066 0.3733073695667222 0.1955143093485553 T T T

0.7297015830976282 0.3272205719754903 0.9816014183759922 T T T

0.8844819640185474 0.3254826723304556 0.9899012980423393 T T T

0.9412596633988050 0.3733962578206892 0.1853275992558461 T T T

0.9179238712676526 0.4467261898145334 0.8612643712912508 T T T

0.7966315158151518 0.4734074110463238 0.7223439643760432 T T T

0.7772624546395184 0.4375293496144085 0.4970213893357810 T T T

0.6197567994825658 0.4299072839866565 0.4906764595418398 T T T

0.5674386785375531 0.4703704054467457 0.7034691657530893 T T T

0.6724619568309601 0.4467468535625888 0.8589102007694298 T T T

0.9197545805450772 0.6787311824944017 0.8322699632783102 T T T

0.7691089305458518 0.6704803166631652 0.4651511330346763 T T T

**Structure files (CONTCAR) involved in this work:**

|                    |                    |                    |   |   |   |
|--------------------|--------------------|--------------------|---|---|---|
| 0.6135434877790451 | 0.6732757042063729 | 0.4846756804328072 | T | T | T |
| 0.5587484382477214 | 0.6291468881675537 | 0.6967658644946804 | T | T | T |
| 0.6679246245298471 | 0.6762421486119295 | 0.8286162308093165 | T | T | T |
| 0.5785042678321088 | 0.9461817841403779 | 0.3586555843574630 | T | T | T |
| 0.6995698563869502 | 0.9748544886529995 | 0.2172526984990707 | T | T | T |
| 0.7197162736090993 | 0.9386292984661961 | 0.9943153773619433 | T | T | T |
| 0.8798425285311142 | 0.9343496086522899 | 0.9956060585876609 | T | T | T |
| 0.9313659076515804 | 0.9715338646319778 | 0.2053858794329461 | T | T | T |
| 0.8237788571582714 | 0.9474673856528819 | 0.3572240661057099 | T | T | T |
| 0.5777845031661110 | 0.1751275590914911 | 0.3298763974295525 | T | T | T |
| 0.6989467095240532 | 0.1335813726415893 | 0.1961027557457242 | T | T | T |
| 0.7317823374786964 | 0.1712925886961807 | 0.9729111929701418 | T | T | T |
| 0.8863267176788652 | 0.1734578960405449 | 0.9813253992842991 | T | T | T |
| 0.9357035306438922 | 0.1297645430913420 | 0.1959556764949801 | T | T | T |
| 0.8220975541555889 | 0.1765245572124540 | 0.3325045400564508 | T | T | T |
| 0.9233786553307375 | 0.0540637181542519 | 0.8559307529710501 | T | T | T |
| 0.8017539545159884 | 0.0266550629202569 | 0.7092972942351261 | T | T | T |
| 0.7822998184880311 | 0.0681666099872883 | 0.4919402608564575 | T | T | T |
| 0.6218407308301186 | 0.0712366788918003 | 0.4897676144383053 | T | T | T |
| 0.5687221267505294 | 0.0323547740060961 | 0.6981945256094122 | T | T | T |
| 0.6784086265077113 | 0.0541380557874581 | 0.8499709793945062 | T | T | T |
| 0.9240844600267387 | 0.8316254604697132 | 0.8375340962290475 | T | T | T |
| 0.8018508282611385 | 0.8694751173613562 | 0.6974398331212524 | T | T | T |
| 0.7699468695009661 | 0.8273155385086750 | 0.4796592123102428 | T | T | T |
| 0.6148680397581797 | 0.8272321738046408 | 0.4896287488509975 | T | T | T |
| 0.5635130482474952 | 0.8751953149800323 | 0.6968564186112679 | T | T | T |
| 0.6769421245969144 | 0.8341852364489343 | 0.8354778798219709 | T | T | T |
| 0.4219665495120341 | 0.4435036871398211 | 0.6407250981828437 | T | T | T |
| 0.3026236115730088 | 0.4698047531369881 | 0.7823743609350435 | T | T | T |
| 0.2795991946528520 | 0.4451774389512443 | 0.0087678847114001 | T | T | T |
| 0.1213586472434161 | 0.4375798149028135 | 0.0115013914271522 | T | T | T |
| 0.0620294627940440 | 0.4696577319931597 | 0.7994204480872267 | T | T | T |
| 0.1741761871088300 | 0.4362929839269870 | 0.6581230211283534 | T | T | T |
| 0.4133402590703926 | 0.6745804875130902 | 0.6604853714593469 | T | T | T |
| 0.2984102052976588 | 0.6282770640657694 | 0.7948226293206180 | T | T | T |
| 0.2666658622387953 | 0.6697308070570550 | 0.0143627429610162 | T | T | T |
| 0.1107311899353070 | 0.6721865257590673 | 0.0061494998221247 | T | T | T |
| 0.0614351151523578 | 0.6285547404571821 | 0.7918242912748158 | T | T | T |
| 0.1767080450585187 | 0.6717292484272266 | 0.6595264988189303 | T | T | T |
| 0.0738714004323716 | 0.5589420152859184 | 0.1483377768907454 | T | T | T |
| 0.1954022425494042 | 0.5301444719711891 | 0.2834488852317951 | T | T | T |
| 0.2130202443461058 | 0.5558026873794915 | 0.5123933402438600 | T | T | T |
| 0.3717756348352719 | 0.5660906490547783 | 0.5102647911037210 | T | T | T |
| 0.4277957343125088 | 0.5305709135367643 | 0.3004471014634635 | T | T | T |
| 0.3209910729981049 | 0.5638145154256360 | 0.1559950912545542 | T | T | T |
| 0.0863151413637448 | 0.3245496508365936 | 0.1567957877472560 | T | T | T |
| 0.1987865948094282 | 0.3717657563687940 | 0.2949381399442110 | T | T | T |
| 0.2289935620399121 | 0.3310621566895203 | 0.5145528279699776 | T | T | T |
| 0.3845763275169538 | 0.3284276631577079 | 0.5033501994461294 | T | T | T |
| 0.4296745455510497 | 0.3736858481697009 | 0.2900128804049139 | T | T | T |
| 0.3174838539555607 | 0.3296549740578428 | 0.1574684931094463 | T | T | T |
| 0.9239223790276738 | 0.5285997132889806 | 0.1943400077966926 | T | T | T |
| 0.8246731126111133 | 0.3379408308793552 | 0.3288624354231041 | T | T | T |

**Structure files (CONTCAR) involved in this work:**

|                    |                    |                    |   |   |   |
|--------------------|--------------------|--------------------|---|---|---|
| 0.7948518105799995 | 0.6385216996924489 | 0.7005791748863308 | T | T | T |
| 0.0083965595779113 | 0.5537775199585865 | 0.2220000377869455 | T | T | T |
| 0.3597367143023121 | 0.0710102782136716 | 0.7211097936387755 | T | T | T |
| 0.3178391977555739 | 0.0517914168502533 | 0.9056770613826014 | T | T | T |
| 0.2033591220051613 | 0.0454770640111037 | 0.0048971912672263 | T | T | T |
| 0.0930591369200256 | 0.0701522799669243 | 0.9005029038005932 | T | T | T |
| 0.1037280799533181 | 0.0659114707380813 | 0.7036903302125710 | T | T | T |
| 0.2300955281128493 | 0.0543445358157590 | 0.7587493231302578 | T | T | T |
| 0.3600878938919853 | 0.8283545787379277 | 0.7513327719725326 | T | T | T |
| 0.2997553526139855 | 0.8636240355561862 | 0.9177795492948101 | T | T | T |
| 0.1884882439185973 | 0.8507446554361965 | 0.0228861328897772 | T | T | T |
| 0.0889287422846793 | 0.8331051461213488 | 0.8954448487628343 | T | T | T |
| 0.1024660275022787 | 0.8419141405208185 | 0.6990645601050564 | T | T | T |
| 0.2288198230699892 | 0.8491275793877188 | 0.7529887877949298 | T | T | T |
| 0.3141467191226231 | 0.9516377977144472 | 0.7705688216501247 | T | T | T |
| 0.0901767461947412 | 0.9528132058928933 | 0.8079628245703594 | T | T | T |
| 0.4332948339937135 | 0.1287958714425082 | 0.5804247578189242 | T | T | T |
| 0.4128424966264409 | 0.9978495314071514 | 0.5725337009613384 | T | T | T |
| 0.3917211740481991 | 0.8662291659315209 | 0.5665950275527784 | T | T | T |
| 0.1956197360341579 | 0.1387949847514108 | 0.6145514989335975 | T | T | T |
| 0.1891828362601993 | 0.0060537205260998 | 0.5831346120656744 | T | T | T |
| 0.1952037146890049 | 0.8728639411545519 | 0.5625224185649785 | T | T | T |
| 0.9882815950085360 | 0.0388523518685603 | 0.7868592211626548 | T | T | T |
| 0.9859627760141126 | 0.8713215907800268 | 0.7839717395543504 | T | T | T |
| 0.1402460508394172 | 0.9312786791689629 | 0.2209508801618310 | T | T | T |
| 0.1834061498275138 | 0.9509645366512409 | 0.4049100092113360 | T | T | T |
| 0.2971083322775304 | 0.9507981258979757 | 0.5073310525643178 | T | T | T |
| 0.4073609756394985 | 0.9329933262832396 | 0.4008984862888941 | T | T | T |
| 0.3972376429016846 | 0.9348784078843905 | 0.2043976196631197 | T | T | T |
| 0.2702979040861879 | 0.9464435684892404 | 0.2571765925066332 | T | T | T |
| 0.1391371880028570 | 0.1732069075983767 | 0.2524236077283176 | T | T | T |
| 0.1970951515536401 | 0.1363904374203993 | 0.4188869598292332 | T | T | T |
| 0.3103620297724420 | 0.1503954913181499 | 0.5164320604566440 | T | T | T |
| 0.4125625456759579 | 0.1683535581696749 | 0.3928788834810051 | T | T | T |
| 0.3961494605126721 | 0.1595057957832304 | 0.1970706268529803 | T | T | T |
| 0.2709102728874347 | 0.1539554762590588 | 0.2569575846278979 | T | T | T |
| 0.1871966652647270 | 0.0501419643880192 | 0.2684706163418455 | T | T | T |
| 0.4157997229672510 | 0.0489193999013757 | 0.3046977587161585 | T | T | T |
| 0.0649147097566509 | 0.8718789306709405 | 0.0841455210869571 | T | T | T |
| 0.0864314752648652 | 0.0017368335027785 | 0.0692207581197975 | T | T | T |
| 0.1122259380510600 | 0.1323430166938301 | 0.0687124870230929 | T | T | T |
| 0.3059755104906531 | 0.8618211215534357 | 0.1133318414463789 | T | T | T |
| 0.3128753976874349 | 0.9945040236896306 | 0.0823593538838821 | T | T | T |
| 0.3006819849279125 | 0.1274237765547646 | 0.0655453974931422 | T | T | T |
| 0.5136587897533071 | 0.9575778237120932 | 0.2877975304332987 | T | T | T |
| 0.5153393572086723 | 0.1357700235552760 | 0.2774113769029588 | T | T | T |
| 0.6345534734095833 | 0.5634543603449816 | 0.2705643831774971 | T | T | T |
| 0.7014428165072228 | 0.5750411988524123 | 0.1044146338353786 | T | T | T |
| 0.7926468827274110 | 0.5653306065676850 | 0.9580164474059197 | T | T | T |
| 0.8834704107273335 | 0.5775462621246591 | 0.1065325469117901 | T | T | T |
| 0.8859230327881430 | 0.5280248396187853 | 0.3169492195047432 | T | T | T |
| 0.7598869939963884 | 0.5254640467431483 | 0.2645457764977010 | T | T | T |
| 0.6384843960642494 | 0.3380418528850665 | 0.2660495934459290 | T | T | T |

**Structure files (CONTCAR) involved in this work:**

|                    |                    |                    |   |   |   |
|--------------------|--------------------|--------------------|---|---|---|
| 0.6929136346429647 | 0.3337451724085226 | 0.0888130661347730 | T | T | T |
| 0.8073128462604652 | 0.3517383034994634 | 0.9896327309500138 | T | T | T |
| 0.9123990597493824 | 0.3199482234041163 | 0.1035300956428578 | T | T | T |
| 0.9074098177827693 | 0.3591787210043269 | 0.2942811023798516 | T | T | T |
| 0.7666915839450242 | 0.3704841452666212 | 0.2465918160077397 | T | T | T |
| 0.6708037959154460 | 0.4511589491374880 | 0.1741999725037558 | T | T | T |
| 0.9266758455054863 | 0.4482235448391401 | 0.1486091331588821 | T | T | T |
| 0.5680112533450783 | 0.6271707765535024 | 0.4113360089121638 | T | T | T |
| 0.5952791914627598 | 0.4985107135046369 | 0.4359376487727648 | T | T | T |
| 0.5825982579713204 | 0.3652324219891890 | 0.4427850206874800 | T | T | T |
| 0.8049538499033394 | 0.6309897055442818 | 0.3718134235488508 | T | T | T |
| 0.7931624351998119 | 0.5166942493952887 | 0.4598282140332750 | T | T | T |
| 0.8306365778312704 | 0.3917119420760908 | 0.4373092068888608 | T | T | T |
| 0.0214163628009967 | 0.3623688446077277 | 0.2000658303893457 | T | T | T |
| 0.8525181626220439 | 0.4367698882410756 | 0.7901563573460055 | T | T | T |
| 0.7927128539018727 | 0.4343961008303699 | 0.6153999197026200 | T | T | T |
| 0.7001728897398245 | 0.4206636111022534 | 0.4727286394450062 | T | T | T |
| 0.6035806712817648 | 0.4332257829461005 | 0.6090892172225494 | T | T | T |
| 0.5988506150329335 | 0.4435426162158110 | 0.8080833012326916 | T | T | T |
| 0.7238994475002195 | 0.4720676869727063 | 0.7724637530125754 | T | T | T |
| 0.8573504531674923 | 0.6817192932744611 | 0.7580311065076495 | T | T | T |
| 0.8106443806577259 | 0.6477172131056373 | 0.5667481357661227 | T | T | T |
| 0.6914792822766358 | 0.6479023231298910 | 0.4782367299906656 | T | T | T |
| 0.5862839904681066 | 0.6673069631282655 | 0.5977282276948533 | T | T | T |
| 0.5897391373711883 | 0.6654781350154413 | 0.7953135441039799 | T | T | T |
| 0.7146665924377029 | 0.6515709061674099 | 0.7375926809504341 | T | T | T |
| 0.8185432173052427 | 0.5512674372240105 | 0.6993708401564793 | T | T | T |
| 0.5800751035170405 | 0.5505318257305025 | 0.6918740922235763 | T | T | T |
| 0.9291552385416578 | 0.3776716536860800 | 0.9239285167992235 | T | T | T |
| 0.9109224183449255 | 0.5108764858027116 | 0.9345653817769285 | T | T | T |
| 0.9011279015328216 | 0.6427014939372598 | 0.9377409037780031 | T | T | T |
| 0.6917077066217525 | 0.3725968683107984 | 0.8983809942876884 | T | T | T |
| 0.6750239088264437 | 0.5013276736430585 | 0.9486702229858448 | T | T | T |
| 0.6810007236895171 | 0.6348930825644820 | 0.9317458128378326 | T | T | T |
| 0.4883963771227256 | 0.4526749648554230 | 0.7081764385300853 | T | T | T |
| 0.4777426798526276 | 0.6335574073078075 | 0.7016513143161014 | T | T | T |
| 0.6441910551435069 | 0.9402255177766800 | 0.2888413531474889 | T | T | T |
| 0.7000953571989300 | 0.9350858306118087 | 0.1115395861927746 | T | T | T |
| 0.8001263397585464 | 0.9440039984471634 | 0.9789244750018566 | T | T | T |
| 0.8978131551952208 | 0.9298455852621781 | 0.1135180645918149 | T | T | T |
| 0.8987356749597502 | 0.9486624866286409 | 0.3111177239519746 | T | T | T |
| 0.7725870462103307 | 0.9674644665782407 | 0.2681125698102624 | T | T | T |
| 0.6408965090333391 | 0.1747405859528979 | 0.2544425839841978 | T | T | T |
| 0.6973738794026979 | 0.1573423863320360 | 0.0804494209761529 | T | T | T |
| 0.8094209943507737 | 0.1466714835388834 | 0.9768884269793290 | T | T | T |
| 0.9130754188158571 | 0.1689323254911693 | 0.0952180945623021 | T | T | T |
| 0.8980629586393544 | 0.1605874881583788 | 0.2928780519923275 | T | T | T |
| 0.7713560673797097 | 0.1486263174643969 | 0.2453096853048318 | T | T | T |
| 0.6819087456901992 | 0.0537004586172802 | 0.2020036973699816 | T | T | T |
| 0.9179459500816732 | 0.0505764109788210 | 0.1841032885311205 | T | T | T |
| 0.5695177472145820 | 0.8763232265276256 | 0.4206883260203028 | T | T | T |
| 0.5840108647740601 | 0.0078558578985902 | 0.4378658325736423 | T | T | T |
| 0.5977523186696730 | 0.1402239767987721 | 0.4357975760913962 | T | T | T |

**Structure files (CONTCAR) involved in this work:**

|                    |                    |                    |   |   |   |
|--------------------|--------------------|--------------------|---|---|---|
| 0.8100718189083830 | 0.8720828148504154 | 0.3988875746242214 | T | T | T |
| 0.8175630746122113 | 0.0004729104170156 | 0.4486228418659960 | T | T | T |
| 0.8093933729151493 | 0.1343651127879752 | 0.4354954387135438 | T | T | T |
| 0.0105770027722107 | 0.9552035510065605 | 0.2150353199771685 | T | T | T |
| 0.0160872738489447 | 0.1376339426532996 | 0.2101278005274488 | T | T | T |
| 0.8579471076046119 | 0.0545875209768250 | 0.7852904643898068 | T | T | T |
| 0.8013407449063783 | 0.0733684633030875 | 0.6098355321568001 | T | T | T |
| 0.7017983671324383 | 0.0612169231718331 | 0.4772965828920014 | T | T | T |
| 0.6014060553427050 | 0.0756924888755818 | 0.6071424333988853 | T | T | T |
| 0.6034517711604912 | 0.0508439938539359 | 0.8041858781910372 | T | T | T |
| 0.7291312992348944 | 0.0300282916001859 | 0.7624484397832558 | T | T | T |
| 0.8597363076626700 | 0.8363941526471663 | 0.7650485099529646 | T | T | T |
| 0.8029985829335408 | 0.8315039165030055 | 0.5900304247869892 | T | T | T |
| 0.6924947759204941 | 0.8518912835903916 | 0.4844173831058850 | T | T | T |
| 0.5895542144626744 | 0.8287263794081035 | 0.6047490481855903 | T | T | T |
| 0.6017032115855407 | 0.8535662998353245 | 0.7989095722257995 | T | T | T |
| 0.7293155506452319 | 0.8590399942353918 | 0.7496569023308789 | T | T | T |
| 0.8167085693495950 | 0.9488295346609171 | 0.6798909238464105 | T | T | T |
| 0.5787413880717656 | 0.9533225690057013 | 0.6707187440994835 | T | T | T |
| 0.9321101405079628 | 0.1273415748375758 | 0.9081271129869215 | T | T | T |
| 0.9179738041926667 | 0.9976677300315668 | 0.9438187548536194 | T | T | T |
| 0.9057446803523470 | 0.8649883274104413 | 0.9449648018355136 | T | T | T |
| 0.6932672761862206 | 0.1305365887759630 | 0.8852124798103477 | T | T | T |
| 0.6845322177375999 | 0.0047202461135370 | 0.9461453998714473 | T | T | T |
| 0.6925160581918056 | 0.8708381247883948 | 0.9411208631424784 | T | T | T |
| 0.4900517732563526 | 0.0494801251145669 | 0.7127852321472881 | T | T | T |
| 0.4838097074343042 | 0.8641661955960891 | 0.7124529648220379 | T | T | T |
| 0.3575719962160338 | 0.4321288894262834 | 0.7129986263941290 | T | T | T |
| 0.3113383522227777 | 0.4455280573427025 | 0.8971853603553914 | T | T | T |
| 0.1995493083308329 | 0.4591298764335109 | 0.0039861682775876 | T | T | T |
| 0.0882645271964559 | 0.4348656434527634 | 0.9013184401506922 | T | T | T |
| 0.0986558540709735 | 0.4352704708693181 | 0.7033073778274769 | T | T | T |
| 0.2270201324555772 | 0.4513561289428357 | 0.7474558283604008 | T | T | T |
| 0.3556867029330687 | 0.6751421167804740 | 0.7458226691284207 | T | T | T |
| 0.2999669744192903 | 0.6387197991009677 | 0.9142665543532931 | T | T | T |
| 0.1882424528592971 | 0.6484511097994756 | 0.0169120356376149 | T | T | T |
| 0.0876616579505441 | 0.6680985781708094 | 0.8903857538332849 | T | T | T |
| 0.0996132387585962 | 0.6587592116376990 | 0.6937500636556294 | T | T | T |
| 0.2252693184905776 | 0.6488205885963758 | 0.7512476411419171 | T | T | T |
| 0.3144395273734689 | 0.5501735120896234 | 0.7691208525227416 | T | T | T |
| 0.0797517269653112 | 0.5492454643738279 | 0.8021757680227443 | T | T | T |
| 0.4313929222010102 | 0.3782503589675735 | 0.5689695600403185 | T | T | T |
| 0.4140332021527785 | 0.5096281619484248 | 0.5704318051021904 | T | T | T |
| 0.3833563043320258 | 0.6394829578082775 | 0.5600774503037379 | T | T | T |
| 0.1897923889019102 | 0.3632162037043986 | 0.6094839030758359 | T | T | T |
| 0.1775067346309502 | 0.4951355903495993 | 0.5736875471804586 | T | T | T |
| 0.1926432143604900 | 0.6282235014546449 | 0.5592381045762855 | T | T | T |
| 0.9818964033554164 | 0.4577974226339934 | 0.7861972188901513 | T | T | T |
| 0.9815435052658491 | 0.6379017448011951 | 0.7777658052268671 | T | T | T |
| 0.1402043124393580 | 0.5701152417936970 | 0.2171970817118613 | T | T | T |
| 0.1846906432336412 | 0.5531492900614734 | 0.3986793148327859 | T | T | T |
| 0.2932140053960919 | 0.5454078172266249 | 0.5139097403224825 | T | T | T |
| 0.3974452514249533 | 0.5703513257627925 | 0.3960039586129202 | T | T | T |

**Structure files (CONTCAR) involved in this work:**

|                    |                    |                    |   |   |   |
|--------------------|--------------------|--------------------|---|---|---|
| 0.3967395725659397 | 0.5635075691269271 | 0.1992960258440530 | T | T | T |
| 0.2703620784360106 | 0.5495207466288405 | 0.2491726622221576 | T | T | T |
| 0.1428695468080897 | 0.3245807968168196 | 0.2439006741532380 | T | T | T |
| 0.1951084405289580 | 0.3622976396710066 | 0.4146772265090659 | T | T | T |
| 0.3072815797814455 | 0.3525531483823988 | 0.5172241814773425 | T | T | T |
| 0.4049262023035112 | 0.3302462497949998 | 0.3860794184719745 | T | T | T |
| 0.3946424869262170 | 0.3451523014351943 | 0.1885344116397834 | T | T | T |
| 0.2721734462723620 | 0.3508399930504253 | 0.2540805094136170 | T | T | T |
| 0.1828778833706630 | 0.4500512553657007 | 0.2681232062631415 | T | T | T |
| 0.4076582045889409 | 0.4515145740052730 | 0.3078395983289166 | T | T | T |
| 0.0647210512696567 | 0.6235407658043438 | 0.0752026002781351 | T | T | T |
| 0.0813851842223620 | 0.4916005952116659 | 0.0805753341494697 | T | T | T |
| 0.1153363394000975 | 0.3627024291079253 | 0.0583774339733387 | T | T | T |
| 0.3049702346982064 | 0.6373996199885544 | 0.1097386456322083 | T | T | T |
| 0.3138013971044668 | 0.5054585949898343 | 0.0721672308886536 | T | T | T |
| 0.2952809676649207 | 0.3727685596145797 | 0.0598171258337050 | T | T | T |
| 0.5080708979975287 | 0.5376006776888632 | 0.2962156128758838 | T | T | T |
| 0.5099316251778759 | 0.3669139688907743 | 0.2767103247337355 | T | T | T |
| 0.4344118831582999 | 0.7511754295430112 | 0.6346503585197113 | T | T | T |
| 0.1882995959498498 | 0.7502054666753754 | 0.6321289613492728 | T | T | T |
| 0.2760136548920262 | 0.7502291889891100 | 0.0168878383046704 | T | T | T |
| 0.1026879356993154 | 0.7486629132397075 | 0.0458281620649102 | T | T | T |
| 0.0680539733836258 | 0.2479848366626241 | 0.1274907159388083 | T | T | T |
| 0.3084513228240334 | 0.2507194761510446 | 0.1309709582108438 | T | T | T |
| 0.2209444411092404 | 0.2504192794895287 | 0.5166290939751647 | T | T | T |
| 0.3943348161169494 | 0.2523568322486156 | 0.5438944439551051 | T | T | T |
| 0.5553489055337421 | 0.2518829775678034 | 0.3527350402514549 | T | T | T |
| 0.8124536920675247 | 0.2545736756265995 | 0.3550854918556934 | T | T | T |
| 0.7264958826930670 | 0.2500374199619348 | 0.9436509494168160 | T | T | T |
| 0.8901491772454811 | 0.2506418784218479 | 0.9416443378087335 | T | T | T |
| 0.9459274405808951 | 0.7544829116771568 | 0.8573386711810258 | T | T | T |
| 0.6822361848886805 | 0.7544910862909975 | 0.8545615003836808 | T | T | T |
| 0.7752882554227787 | 0.7496292693383595 | 0.4429250833969456 | T | T | T |
| 0.6086902327050434 | 0.7507959763514007 | 0.4479406671712456 | T | T | T |
| 0.9315729495529658 | 0.5024113684819647 | 0.5358082155577073 | T | T | T |
| 0.9301307220365523 | 0.4383610701329047 | 0.4024760476605755 | T | T | T |
| 0.8634086768867593 | 0.5627569978245579 | 0.5645368559936788 | T | T | T |
| 0.9501331129156104 | 0.4821103664570533 | 0.5962085744783105 | T | T | T |
| 0.0585490269694393 | 0.4616958949371616 | 0.4584317651346430 | T | T | T |
| 0.0571889199594647 | 0.4478829775093656 | 0.3241054413200871 | T | T | T |
| 0.0065219733684082 | 0.5574754614130353 | 0.4331462124185469 | T | T | T |
| 0.9846385383626585 | 0.6272633028430066 | 0.3474822633815345 | T | T | T |
| 0.0739674399691336 | 0.6018674699904609 | 0.3617376119948425 | T | T | T |
| 0.0273085850516384 | 0.4533664304823577 | 0.3919583974391491 | T | T | T |
| 0.0213322553073541 | 0.5906153524982790 | 0.3720181159461578 | T | T | T |

**Figure 5(a) TS3**

Si Al O Zn H C

1.0000000000000000

20.0219999999999985 0.0000000000000000 0.0000000000000000

0.0000000000000000 19.8990000000000009 0.0000000000000000

0.0000000000000000 0.0000000000000000 13.3829999999999991

93 3 193 2 6 2

Selective dynamics

**Structure files (CONTCAR) involved in this work:**

Direct

|                    |                    |                    |   |   |   |
|--------------------|--------------------|--------------------|---|---|---|
| 0.4233115791869735 | 0.0617351788562071 | 0.6475202793983041 | T | T | T |
| 0.3057835439584447 | 0.0299762259786978 | 0.7918530919736082 | T | T | T |
| 0.2830296001324792 | 0.0559082199256675 | 0.0157835266992746 | T | T | T |
| 0.1243706940189675 | 0.0595418826448359 | 0.0127300647708643 | T | T | T |
| 0.0676164395829531 | 0.0318183142819365 | 0.8013555733227066 | T | T | T |
| 0.1802398345857099 | 0.0644532835821345 | 0.6658391028877637 | T | T | T |
| 0.4181835611990478 | 0.8282975905130985 | 0.6680270344868476 | T | T | T |
| 0.3021822287273064 | 0.8705999509709187 | 0.8034543571937590 | T | T | T |
| 0.2664092736135607 | 0.8319017839309045 | 0.0229730269451626 | T | T | T |
| 0.1121394929221043 | 0.8266479522402574 | 0.0114112060639530 | T | T | T |
| 0.0657160974662915 | 0.8749858349737935 | 0.7969863584740515 | T | T | T |
| 0.1806730822324464 | 0.8282809373022414 | 0.6668864960570128 | T | T | T |
| 0.0766521093977478 | 0.9384843658165509 | 0.1502323585223521 | T | T | T |
| 0.1944234468237094 | 0.9704147246971481 | 0.2927669645347228 | T | T | T |
| 0.2170731500268721 | 0.9442881763460618 | 0.5178757272748977 | T | T | T |
| 0.3766662148706851 | 0.9384111538523472 | 0.5139627542662938 | T | T | T |
| 0.4335897079970237 | 0.9686870812349369 | 0.3027985461596956 | T | T | T |
| 0.3205625015291697 | 0.9377093879838762 | 0.1659521262036303 | T | T | T |
| 0.0834163955939679 | 0.1710083612552056 | 0.1657088196690079 | T | T | T |
| 0.1967317480389086 | 0.1291455931677207 | 0.3039861976057963 | T | T | T |
| 0.2319373277069003 | 0.1705376424525265 | 0.5214542935247262 | T | T | T |
| 0.3870871358862655 | 0.1754740492182650 | 0.5084759652191169 | T | T | T |
| 0.4347030015472241 | 0.1271392762740519 | 0.2951617122348026 | T | T | T |
| 0.3170715604938946 | 0.1710683707691455 | 0.1666776823146277 | T | T | T |
| 0.5758993746695522 | 0.5561552707366307 | 0.3528138847204621 | T | T | T |
| 0.6923097788267309 | 0.5257708644038103 | 0.2038380877883573 | T | T | T |
| 0.7129862895497980 | 0.5676992633025129 | 0.9858570774343444 | T | T | T |
| 0.8711640799816442 | 0.5728972691724077 | 0.9849483974224091 | T | T | T |
| 0.8133646896279534 | 0.5508497234329603 | 0.3464629229615606 | T | T | T |
| 0.5749219112561992 | 0.3279949910228573 | 0.3333267297049206 | T | T | T |
| 0.6961648406721559 | 0.3713234738662257 | 0.1956565965377456 | T | T | T |
| 0.7297167274845500 | 0.3269490094571242 | 0.9818659440010205 | T | T | T |
| 0.8845123123782168 | 0.3261902319575468 | 0.9935744272149464 | T | T | T |
| 0.9439290849788491 | 0.3742390754895621 | 0.1887083429019744 | T | T | T |
| 0.9187878652277381 | 0.4452960575080466 | 0.8599664054846361 | T | T | T |
| 0.7969778252896644 | 0.4721253956894607 | 0.7223639195244383 | T | T | T |
| 0.7749121274758851 | 0.4370233746880171 | 0.4959296200636731 | T | T | T |
| 0.6166474965183546 | 0.4305371811238587 | 0.4897147943027175 | T | T | T |
| 0.5663124663517165 | 0.4700364235957379 | 0.7033780819561674 | T | T | T |
| 0.6721477394809452 | 0.4461455228422071 | 0.8587533941387984 | T | T | T |
| 0.9184125577495980 | 0.6793695443228724 | 0.8305529847024280 | T | T | T |
| 0.7694780856863194 | 0.6689824031722016 | 0.4659275220740136 | T | T | T |
| 0.6140782068842836 | 0.6724809202428024 | 0.4862622907453479 | T | T | T |
| 0.5588165966938226 | 0.6289638898113766 | 0.6985003509936165 | T | T | T |
| 0.6692010232213829 | 0.6745994627174760 | 0.8298095336992927 | T | T | T |
| 0.5785601401401804 | 0.9447566086245706 | 0.3594983026754027 | T | T | T |
| 0.6994958335811654 | 0.9735601898678603 | 0.2169688773906196 | T | T | T |
| 0.7197761811066813 | 0.9378202623478497 | 0.9943730042379091 | T | T | T |
| 0.8799186892957406 | 0.9349977270033974 | 0.9960035711359579 | T | T | T |
| 0.9316394443863599 | 0.9702615073291043 | 0.2058411812981290 | T | T | T |
| 0.8235685245034717 | 0.9466932243288709 | 0.3577171237326024 | T | T | T |
| 0.5776318347699106 | 0.1730824807383272 | 0.3307048468829815 | T | T | T |



**Structure files (CONTCAR) involved in this work:**

|                    |                    |                    |   |   |   |
|--------------------|--------------------|--------------------|---|---|---|
| 0.6992060143646066 | 0.1321523290077300 | 0.1965766239545222 | T | T | T |
| 0.7321134699948295 | 0.1711551097453262 | 0.9744317696520568 | T | T | T |
| 0.8865564178816081 | 0.1737119920550163 | 0.9832771483777666 | T | T | T |
| 0.9366859408020887 | 0.1281839701227898 | 0.1965538462047697 | T | T | T |
| 0.8228502775315237 | 0.1744366377241559 | 0.3323277294134405 | T | T | T |
| 0.9227046534483578 | 0.0548392124185151 | 0.8565812277472987 | T | T | T |
| 0.8009599625634753 | 0.0263575116129837 | 0.7102639403302684 | T | T | T |
| 0.7822456468612244 | 0.0673977145294896 | 0.4926247267315583 | T | T | T |
| 0.6218595388369278 | 0.0695058517077875 | 0.4911154451388523 | T | T | T |
| 0.5686799824598500 | 0.0322838338337059 | 0.7000662335274888 | T | T | T |
| 0.6780303044928641 | 0.0539062337001786 | 0.8515204249991927 | T | T | T |
| 0.9236631705199890 | 0.8318238006371288 | 0.8376724630703065 | T | T | T |
| 0.8013557881184912 | 0.8690543454370522 | 0.6977062379203148 | T | T | T |
| 0.7702088991815150 | 0.8264850100895978 | 0.4804321588244190 | T | T | T |
| 0.6151800898677638 | 0.8265469213497140 | 0.4908370445409526 | T | T | T |
| 0.5634649059339997 | 0.8748477225407273 | 0.6986172169749205 | T | T | T |
| 0.6771421713224161 | 0.8327050172258044 | 0.8354584116357153 | T | T | T |
| 0.4221695053347688 | 0.4455092850376474 | 0.6357429100934718 | T | T | T |
| 0.3007082986657700 | 0.4713461757411438 | 0.7782003448369859 | T | T | T |
| 0.2807588376695165 | 0.4386285910155854 | 0.0009207346769693 | T | T | T |
| 0.1215829601805197 | 0.4352973547798824 | 0.0048632365694527 | T | T | T |
| 0.0634852082510591 | 0.4716560436010473 | 0.7934235119269542 | T | T | T |
| 0.1738530581464092 | 0.4434180150759490 | 0.6452566655101311 | T | T | T |
| 0.4166478843772186 | 0.6747612067888339 | 0.6503239425648141 | T | T | T |
| 0.2982940597467801 | 0.6300387032959792 | 0.7886647613359561 | T | T | T |
| 0.2686500702410544 | 0.6725900402198087 | 0.0074579390547046 | T | T | T |
| 0.1144817824113267 | 0.6726703386596766 | 0.9966812722664156 | T | T | T |
| 0.0604416365680403 | 0.6308125204745698 | 0.7867918646605138 | T | T | T |
| 0.1762346636448516 | 0.6706090611652050 | 0.6551861325055646 | T | T | T |
| 0.0765011676854313 | 0.5584564022672864 | 0.1376578732898646 | T | T | T |
| 0.1984812747555558 | 0.5289826213907511 | 0.2745675693642781 | T | T | T |
| 0.2178852036960319 | 0.5614171469422542 | 0.5036693333079068 | T | T | T |
| 0.3767797290980195 | 0.5677322444859191 | 0.5019142672357066 | T | T | T |
| 0.4288379753198449 | 0.5289894853432295 | 0.2905040538467495 | T | T | T |
| 0.3242948868075018 | 0.5577874776749809 | 0.1376781131192598 | T | T | T |
| 0.0860176012357954 | 0.3231987426166905 | 0.1515201597664224 | T | T | T |
| 0.1994777379566234 | 0.3709709595080326 | 0.2914529757524946 | T | T | T |
| 0.2292327817705345 | 0.3310661516575711 | 0.5120920505572187 | T | T | T |
| 0.3844474782785793 | 0.3292598806433964 | 0.4997246936873629 | T | T | T |
| 0.4336214627214179 | 0.3710229042204888 | 0.2861139251311278 | T | T | T |
| 0.3191664778870256 | 0.3287792877765002 | 0.1578681860469056 | T | T | T |
| 0.9249423728149817 | 0.5300374362307282 | 0.1917382398657660 | T | T | T |
| 0.8250065833548527 | 0.3366599301877177 | 0.3283691821322217 | T | T | T |
| 0.7955702628224941 | 0.6365598347445096 | 0.6990179629796811 | T | T | T |
| 0.0099528034650048 | 0.5583103236236252 | 0.2107143370194941 | T | T | T |
| 0.3590795519479004 | 0.0685481521500856 | 0.7208897942724137 | T | T | T |
| 0.3175840547139683 | 0.0541586245941853 | 0.9061640433100789 | T | T | T |
| 0.2034118645677767 | 0.0429323452440648 | 0.0048887352585863 | T | T | T |
| 0.0919933073623111 | 0.0689032427586780 | 0.9029444331368093 | T | T | T |
| 0.1038213844531474 | 0.0667364895493748 | 0.7060616102013489 | T | T | T |
| 0.2299457360542261 | 0.0490957232648471 | 0.7593921724761739 | T | T | T |
| 0.3606410924695488 | 0.8253376037796727 | 0.7535012168620574 | T | T | T |
| 0.3036200315987554 | 0.8583262773139594 | 0.9228232565922724 | T | T | T |

**Structure files (CONTCAR) involved in this work:**

|                    |                     |                    |   |   |   |
|--------------------|---------------------|--------------------|---|---|---|
| 0.1884225964349547 | 0.8548080718711714  | 0.0188634614769052 | T | T | T |
| 0.0859839643028187 | 0.8346068885679319  | 0.8978189053700997 | T | T | T |
| 0.1036813686421485 | 0.8411610147216197  | 0.7016027888290265 | T | T | T |
| 0.2295606437004734 | 0.8479869653173437  | 0.7599674916038535 | T | T | T |
| 0.3165231622593981 | 0.9492653977815028  | 0.7786245707683259 | T | T | T |
| 0.0888522148171171 | 0.9528918451092648  | 0.8067172167307854 | T | T | T |
| 0.4323717125926964 | 0.1308345032299569  | 0.5840025417284049 | T | T | T |
| 0.4145338704226684 | 0.9995278617713198  | 0.5702467205220786 | T | T | T |
| 0.3900994193226924 | 0.8679681391204368  | 0.5709523403413311 | T | T | T |
| 0.1977210875808040 | 0.1375661831200110  | 0.6193162316318477 | T | T | T |
| 0.1865241564540317 | 0.0057595690254330  | 0.5824274797442872 | T | T | T |
| 0.1987280898842577 | 0.8724713094953067  | 0.5686458382652841 | T | T | T |
| 0.9875682978595788 | 0.0396643419652712  | 0.7873339169242716 | T | T | T |
| 0.9853504678810703 | 0.8702900782093963  | 0.7815655531176432 | T | T | T |
| 0.1410147485741099 | 0.9308838240818148  | 0.2232094427940147 | T | T | T |
| 0.1840362458066593 | 0.9463571823931116  | 0.4073154365450772 | T | T | T |
| 0.2972798328210854 | 0.9538375053785852  | 0.5104150817538595 | T | T | T |
| 0.4065410232511470 | 0.9311125415386061  | 0.4024016612410189 | T | T | T |
| 0.3969204073468615 | 0.9358799235298227  | 0.2061967758045490 | T | T | T |
| 0.2704390363304739 | 0.9529258504002213  | 0.2591358046384644 | T | T | T |
| 0.1391088258322924 | 0.1750225938546283  | 0.2536773061142024 | T | T | T |
| 0.1943734805823369 | 0.1414907794462366  | 0.4232592713809376 | T | T | T |
| 0.3101908681072502 | 0.1492827833039929  | 0.5155293569126403 | T | T | T |
| 0.4132964610292255 | 0.1687418837127172  | 0.3945076244175597 | T | T | T |
| 0.3943970927265210 | 0.1572947096891222  | 0.1991039228741829 | T | T | T |
| 0.2699324973024805 | 0.1502453096127113  | 0.2612702578853617 | T | T | T |
| 0.1815354864550915 | 0.0506589799601980  | 0.2792268040539808 | T | T | T |
| 0.4158614684020667 | 0.0483870336379251  | 0.3101193509788732 | T | T | T |
| 0.0659424692629255 | 0.8683308292994592  | 0.0895208686913326 | T | T | T |
| 0.0868400414339594 | -0.0016455025559296 | 0.0694107057203566 | T | T | T |
| 0.1135684076197562 | 0.1292402386700160  | 0.0722822322410506 | T | T | T |
| 0.3028783356358786 | 0.8648187200098261  | 0.1190295235002327 | T | T | T |
| 0.3148731442953982 | 0.9960623525099905  | 0.0821243530865601 | T | T | T |
| 0.2976178537179696 | 0.1281859683052507  | 0.0676550267755125 | T | T | T |
| 0.5132797314461872 | 0.9569912665024425  | 0.2899329556798118 | T | T | T |
| 0.5146495267455830 | 0.1352509458841656  | 0.2771410168812850 | T | T | T |
| 0.6377641027376634 | 0.5613339061303985  | 0.2757368656466546 | T | T | T |
| 0.7016099935535655 | 0.5725158818446948  | 0.1058319843877193 | T | T | T |
| 0.7919260452504967 | 0.5620829253183580  | 0.9572491954888792 | T | T | T |
| 0.8830251408659895 | 0.5766610364051953  | 0.1033733637450198 | T | T | T |
| 0.8897134903353032 | 0.5320984341835081  | 0.3153924486930849 | T | T | T |
| 0.7632052523311251 | 0.5230562761134572  | 0.2633418417451769 | T | T | T |
| 0.6427387130538563 | 0.3347899438572083  | 0.2696361350394528 | T | T | T |
| 0.6913692179164977 | 0.3332447692455633  | 0.0879373045140666 | T | T | T |
| 0.8071512255909986 | 0.3519778905044088  | 0.9923364064232896 | T | T | T |
| 0.9124737735114148 | 0.3214675167263310  | 0.1078101954425251 | T | T | T |
| 0.9093545843678746 | 0.3620617586351338  | 0.2992382634519256 | T | T | T |
| 0.7700036703380738 | 0.3681756096645418  | 0.2408758520371238 | T | T | T |
| 0.6712967417832507 | 0.4491819306252633  | 0.1781545182160174 | T | T | T |
| 0.9314133195742694 | 0.4489426875532777  | 0.1503799825677228 | T | T | T |
| 0.5686470678078935 | 0.6271479854735225  | 0.4117016403429496 | T | T | T |
| 0.5873393976738459 | 0.4971841834601849  | 0.4352927608342544 | T | T | T |
| 0.5827221877396564 | 0.3638489563296479  | 0.4425236159084210 | T | T | T |

**Structure files (CONTCAR) involved in this work:**

|                    |                    |                    |   |   |   |
|--------------------|--------------------|--------------------|---|---|---|
| 0.8033038495024553 | 0.6306075172138943 | 0.3700657730459729 | T | T | T |
| 0.7973373072799551 | 0.5147025349415629 | 0.4576261982137098 | T | T | T |
| 0.8239352755606362 | 0.3860200889039080 | 0.4390899684754306 | T | T | T |
| 0.0234708415963929 | 0.3599510490212564 | 0.2050738558077340 | T | T | T |
| 0.8538247037850725 | 0.4342723649370920 | 0.7876145892788460 | T | T | T |
| 0.7898101811041548 | 0.4345547732331137 | 0.6146942156335395 | T | T | T |
| 0.6970604750158289 | 0.4266423058995004 | 0.4702191984011320 | T | T | T |
| 0.6016012209794488 | 0.4328652873908151 | 0.6084306347317373 | T | T | T |
| 0.5988415470884185 | 0.4423081167899136 | 0.8067842856160965 | T | T | T |
| 0.7248730805028462 | 0.4722378152604430 | 0.7745058215401511 | T | T | T |
| 0.8560857417550943 | 0.6827807869205309 | 0.7563982554074434 | T | T | T |
| 0.8118666032675770 | 0.6443308741042091 | 0.5655883863833568 | T | T | T |
| 0.6918059415619481 | 0.6466867616347655 | 0.4811479677457049 | T | T | T |
| 0.5860399124835971 | 0.6667628890225575 | 0.5989689724658509 | T | T | T |
| 0.5908604081306971 | 0.6642900114201391 | 0.7968971809678798 | T | T | T |
| 0.7156289399143893 | 0.6486979213637234 | 0.7390977749225336 | T | T | T |
| 0.8210987549601363 | 0.5495848354928929 | 0.6999452683812218 | T | T | T |
| 0.5792884898651484 | 0.5501539424199858 | 0.6929723778286121 | T | T | T |
| 0.9292748511839335 | 0.3776302407742183 | 0.9263059076818250 | T | T | T |
| 0.9112293735868952 | 0.5104641440161212 | 0.9311198146688674 | T | T | T |
| 0.8995757199965998 | 0.6416541123220871 | 0.9346375443514879 | T | T | T |
| 0.6922280353092427 | 0.3720284341306891 | 0.8977127874152857 | T | T | T |
| 0.6732376773951205 | 0.5003405743347744 | 0.9492007218706680 | T | T | T |
| 0.6817294826753317 | 0.6339774543220935 | 0.9339036183092608 | T | T | T |
| 0.4869208413632919 | 0.4531809818809213 | 0.7075024350772515 | T | T | T |
| 0.4777805530030263 | 0.6351817243461905 | 0.7044450827734366 | T | T | T |
| 0.6437841340504852 | 0.9395468867642512 | 0.2886243131659402 | T | T | T |
| 0.7004086806865609 | 0.9333313163893310 | 0.1116546045554062 | T | T | T |
| 0.8001490450274336 | 0.9441454460613696 | 0.9789007660108425 | T | T | T |
| 0.8976268014342089 | 0.9290793417953593 | 0.1138978993783632 | T | T | T |
| 0.8985123537823244 | 0.9482163412630414 | 0.3115622387940927 | T | T | T |
| 0.7722666709597987 | 0.9665714790731982 | 0.2687352048227158 | T | T | T |
| 0.6410886778247142 | 0.1722661207982722 | 0.2560784296315703 | T | T | T |
| 0.6972710135281474 | 0.1577942386527677 | 0.0818189348449838 | T | T | T |
| 0.8097324706033345 | 0.1467092642045105 | 0.9798462734663244 | T | T | T |
| 0.9142197146178608 | 0.1683394687652442 | 0.0965848303690042 | T | T | T |
| 0.8988237616702579 | 0.1574463384596183 | 0.2941226597150686 | T | T | T |
| 0.7717496471365013 | 0.1463562894188522 | 0.2457640917123087 | T | T | T |
| 0.6821316533339226 | 0.0522571376905828 | 0.1999079525617172 | T | T | T |
| 0.9192418643592775 | 0.0491732109131874 | 0.1828517250618046 | T | T | T |
| 0.5697676340111414 | 0.8743640719549994 | 0.4199991584530866 | T | T | T |
| 0.5846704659118476 | 0.0053293321598338 | 0.4405049477373597 | T | T | T |
| 0.5965614363197957 | 0.1377280392927742 | 0.4365562306794736 | T | T | T |
| 0.8099600743270380 | 0.8711482360208026 | 0.3989465353285215 | T | T | T |
| 0.8174619827881006 | 0.9996822678999995 | 0.4492200642934845 | T | T | T |
| 0.8094837330982176 | 0.1336737733433360 | 0.4363594966090953 | T | T | T |
| 0.0107125338372163 | 0.9534028347781832 | 0.2164237794194646 | T | T | T |
| 0.0168929835069621 | 0.1363348353900659 | 0.2116195829057991 | T | T | T |
| 0.8571004353339738 | 0.0543276099467519 | 0.7863395519837003 | T | T | T |
| 0.8008642382797967 | 0.0728463750303070 | 0.6106002703416596 | T | T | T |
| 0.7018140658755969 | 0.0606087932046702 | 0.4775820081289848 | T | T | T |
| 0.6018154701713969 | 0.0747487905600605 | 0.6084829077225338 | T | T | T |
| 0.6029317522616926 | 0.0516646892145261 | 0.8060955671717238 | T | T | T |

**Structure files (CONTCAR) involved in this work:**

|                    |                    |                    |   |   |   |
|--------------------|--------------------|--------------------|---|---|---|
| 0.7283219506683840 | 0.0299162451424554 | 0.7633334413717411 | T | T | T |
| 0.8586170406048628 | 0.8364910069928825 | 0.7668569949902694 | T | T | T |
| 0.8040916345460970 | 0.8314388992802095 | 0.5901604535234988 | T | T | T |
| 0.6927992339359610 | 0.8513486655031902 | 0.4860320870178391 | T | T | T |
| 0.5888798932810203 | 0.8290970803934117 | 0.6053475978893116 | T | T | T |
| 0.6014928959324665 | 0.8515248596063013 | 0.8000085528928992 | T | T | T |
| 0.7284438917914305 | 0.8576408456335409 | 0.7482252104773666 | T | T | T |
| 0.8157146702845578 | 0.9485538193700048 | 0.6808536309601723 | T | T | T |
| 0.5791977323140464 | 0.9531088615878801 | 0.6743658021751591 | T | T | T |
| 0.9314006235012526 | 0.1285162338206443 | 0.9075674908246313 | T | T | T |
| 0.9177048593939602 | 0.9990761353354290 | 0.9455474421603879 | T | T | T |
| 0.9068592805775678 | 0.8663569977639403 | 0.9447074893737869 | T | T | T |
| 0.6938549448178282 | 0.1300199799722089 | 0.8869990701070335 | T | T | T |
| 0.6839412639542507 | 0.0039485859760743 | 0.9471734162938661 | T | T | T |
| 0.6932284300435849 | 0.8700369373629822 | 0.9404539782454990 | T | T | T |
| 0.4899912378396752 | 0.0497969627686518 | 0.7134994775111195 | T | T | T |
| 0.4836092851484612 | 0.8649421528387904 | 0.7146157608920003 | T | T | T |
| 0.3554397008415320 | 0.4380598469272106 | 0.7039347167267982 | T | T | T |
| 0.3031171614057870 | 0.4326240306000322 | 0.8848142331505310 | T | T | T |
| 0.2008203699970734 | 0.4530546597617781 | 0.0111623778823935 | T | T | T |
| 0.0965804891599416 | 0.4353770165344274 | 0.8899019494781726 | T | T | T |
| 0.0982499677184906 | 0.4437883280816243 | 0.6910251070451399 | T | T | T |
| 0.2258077131066494 | 0.4632157932792022 | 0.7333714311457803 | T | T | T |
| 0.3506910791150129 | 0.6704904401620213 | 0.7198056129329127 | T | T | T |
| 0.3039595828954527 | 0.6602239750945620 | 0.9003208118041628 | T | T | T |
| 0.1915368196265820 | 0.6463304705229855 | 0.0019761116018279 | T | T | T |
| 0.0884284318532185 | 0.6729413690011924 | 0.8821319935627396 | T | T | T |
| 0.0984281117934492 | 0.6576750702401022 | 0.6863182210219921 | T | T | T |
| 0.2230596323438223 | 0.6406664812313921 | 0.7446832096524092 | T | T | T |
| 0.3170317637706623 | 0.5507502731325149 | 0.7914870232606418 | T | T | T |
| 0.0769126971819772 | 0.5516907903847220 | 0.8030400654416839 | T | T | T |
| 0.4305831631089754 | 0.3787584239980260 | 0.5669205517434008 | T | T | T |
| 0.4185154381342462 | 0.5105069009578532 | 0.5618975632718543 | T | T | T |
| 0.3988986713317458 | 0.6413700196061660 | 0.5423310015960884 | T | T | T |
| 0.1903795394935784 | 0.3689617205262738 | 0.6026324162649312 | T | T | T |
| 0.1786486419277180 | 0.4984315583197937 | 0.5550217086493431 | T | T | T |
| 0.1921900899017797 | 0.6322015005496766 | 0.5504126828109865 | T | T | T |
| 0.9836873260855822 | 0.4551485061693637 | 0.7861132977243794 | T | T | T |
| 0.9805512923775150 | 0.6403088989275619 | 0.7740199328338130 | T | T | T |
| 0.1414425889081559 | 0.5678394278357605 | 0.2097467297369351 | T | T | T |
| 0.1993298306680182 | 0.5616894215596741 | 0.3856236560304749 | T | T | T |
| 0.2976426614176261 | 0.5533810442072291 | 0.5215882036291747 | T | T | T |
| 0.3927656292021190 | 0.5666259693754611 | 0.3836951913405366 | T | T | T |
| 0.3985032492345166 | 0.5583496224025729 | 0.1865624307344174 | T | T | T |
| 0.2712701895000048 | 0.5388389008399544 | 0.2252616275685724 | T | T | T |
| 0.1486277070492193 | 0.3247140653012379 | 0.2282732199459871 | T | T | T |
| 0.1930262990470957 | 0.3517489189942194 | 0.4082527217563756 | T | T | T |
| 0.3070634255060972 | 0.3547139828037602 | 0.5078918689886395 | T | T | T |
| 0.4085994214699343 | 0.3297485563871548 | 0.3841125008862794 | T | T | T |
| 0.3972581709202682 | 0.3410774230675278 | 0.1866509984967264 | T | T | T |
| 0.2750663854561063 | 0.3572293144060227 | 0.2517802597181812 | T | T | T |
| 0.1793452670560418 | 0.4497534000193264 | 0.2777875823829791 | T | T | T |
| 0.4131897333968251 | 0.4493142021607862 | 0.3003660835804257 | T | T | T |

**Structure files (CONTCAR) involved in this work:**

|                     |                    |                    |   |   |   |
|---------------------|--------------------|--------------------|---|---|---|
| 0.0689331165496533  | 0.6227124591610044 | 0.0641401292126903 | T | T | T |
| 0.0807767078342528  | 0.4904693728295315 | 0.0714474332172543 | T | T | T |
| 0.1068939724647744  | 0.3607437291213904 | 0.0480610951382269 | T | T | T |
| 0.3084803097927107  | 0.6318212302333885 | 0.0936097141955433 | T | T | T |
| 0.3207685861013886  | 0.5016869522598743 | 0.0496857389855503 | T | T | T |
| 0.2996838342397737  | 0.3685932515149611 | 0.0560863932289220 | T | T | T |
| 0.5084721539272676  | 0.5423797243948093 | 0.2895575740953580 | T | T | T |
| 0.5137690014058797  | 0.3634266087099595 | 0.2720979147639803 | T | T | T |
| 0.4367527092391466  | 0.7526144254972332 | 0.6326826284317134 | T | T | T |
| 0.1904111081509134  | 0.7497976688502554 | 0.6372988643668911 | T | T | T |
| 0.2718182548880060  | 0.7513402611344906 | 0.0348233884114668 | T | T | T |
| 0.1090383591117502  | 0.7478377126228767 | 0.0424979329755329 | T | T | T |
| 0.0673884922166732  | 0.2461290779759516 | 0.1253033982137677 | T | T | T |
| 0.3055858150205426  | 0.2496007629229660 | 0.1391706895238803 | T | T | T |
| 0.2237259440057439  | 0.2511305321174123 | 0.5298050005672202 | T | T | T |
| 0.3914767856766974  | 0.2535089015462182 | 0.5429415820640079 | T | T | T |
| 0.5567242419298342  | 0.2500654299472945 | 0.3543306792703330 | T | T | T |
| 0.8145880118911447  | 0.2528815223984325 | 0.3516655402276992 | T | T | T |
| 0.7273099146259551  | 0.2497308495632746 | 0.9439171931639936 | T | T | T |
| 0.8903279220939057  | 0.2512994665071486 | 0.9458005692948296 | T | T | T |
| 0.9444702625264635  | 0.7546170602578554 | 0.8588883079797267 | T | T | T |
| 0.6834534962410397  | 0.7531011960383732 | 0.8547997707084998 | T | T | T |
| 0.7753400377023681  | 0.7484871232868602 | 0.4452391249632101 | T | T | T |
| 0.6096005832839007  | 0.7500105962511355 | 0.4499485981369513 | T | T | T |
| 0.9319692788698597  | 0.4892487800372943 | 0.5380741503893846 | T | T | T |
| 0.9284546513997407  | 0.4354223734143994 | 0.4088055562328175 | T | T | T |
| 0.8666193481924142  | 0.5573940878321378 | 0.5649108730465936 | T | T | T |
| 0.9477958662441698  | 0.4653676518931819 | 0.5978666469937618 | T | T | T |
| 0.0041008302775825  | 0.5682413716565515 | 0.5020054160187867 | T | T | T |
| 0.0829394490635949  | 0.5404413347596019 | 0.4452137652504223 | T | T | T |
| -0.0016485074470396 | 0.6653400459146501 | 0.3828560593147028 | T | T | T |
| 0.0200487444391998  | 0.5900668949499648 | 0.2940117223646410 | T | T | T |
| 0.0837173595288142  | 0.6440202157552830 | 0.3387248211538163 | T | T | T |
| 0.0420555272378687  | 0.5766442428850332 | 0.4454632469709736 | T | T | T |
| 0.0374426151603917  | 0.6272187752923173 | 0.3749075558945767 | T | T | T |

**Figure 5(b) TS-CH<sub>4</sub> as same as Figure 1(b) Cu/ZSM-5**

**Figure 5(b) TS-CH<sub>3</sub>OH same as Figure2(a) Cu-TS**

**Figure 5(b) TS1**

Si O Al Cu C H

1.0000000000000000

20.0219993591000005 0.0000000000000000 0.0000000000000000

0.0000000000000000 19.8990001678000006 0.0000000000000000

0.0000000000000000 0.0000000000000000 13.3830003737999998

93 195 3 3 2 7

Selective dynamics

Direct

0.4226311016224522 0.0541802826078710 0.6385584247170132 T T T

0.3021480273312168 0.0258756063751446 0.7826360248758295 T T T

0.2807237044895391 0.0631905339876982 0.0029982449275573 T T T

0.1214054383156660 0.0643332109844787 0.0037784892224472 T T T

0.0714545152629520 0.0284839098864306 0.7935921276577753 T T T

0.1785207696890262 0.0523475231199903 0.6421924573684912 T T T

0.4219609844778284 0.8262977354969985 0.6633561322454496 T T T

**Structure files (CONTCAR) involved in this work:**

|                    |                    |                    |   |   |   |
|--------------------|--------------------|--------------------|---|---|---|
| 0.3022621885773933 | 0.8683572711288637 | 0.8024570006137099 | T | T | T |
| 0.2676284210233001 | 0.8278614608801227 | 0.0237013721972781 | T | T | T |
| 0.1127993045859565 | 0.8253749933750092 | 0.0149934956391739 | T | T | T |
| 0.0654970732998899 | 0.8725679095753252 | 0.8031304920305686 | T | T | T |
| 0.1782902475923510 | 0.8276484685253196 | 0.6672566862106970 | T | T | T |
| 0.0768752744282730 | 0.9443442777118967 | 0.1425039677701425 | T | T | T |
| 0.1983544509214099 | 0.9722370115453444 | 0.2867819111284722 | T | T | T |
| 0.2177985409071885 | 0.9328395623191731 | 0.5061487319426926 | T | T | T |
| 0.3771968499027761 | 0.9299074243619767 | 0.5076480477063700 | T | T | T |
| 0.4287314657080386 | 0.9692873486717581 | 0.2986290537852215 | T | T | T |
| 0.3220513149412110 | 0.9473080729278639 | 0.1449172216412763 | T | T | T |
| 0.0782561409423423 | 0.1690460494548817 | 0.1610080618628199 | T | T | T |
| 0.1966098376330154 | 0.1288676410049484 | 0.3041083087226510 | T | T | T |
| 0.2321596469361479 | 0.1723863893007468 | 0.5202881943171047 | T | T | T |
| 0.3865299003168087 | 0.1730047902681746 | 0.5068086610708870 | T | T | T |
| 0.4341193462853229 | 0.1264652507595620 | 0.2968923101584648 | T | T | T |
| 0.3179015050937309 | 0.1680210364982090 | 0.1647137074996979 | T | T | T |
| 0.5768142189565449 | 0.5563777626408499 | 0.3562988815950495 | T | T | T |
| 0.6958197502109240 | 0.5288789057837129 | 0.2169091532034599 | T | T | T |
| 0.7153133864193467 | 0.5495155165575978 | 0.9860389659335564 | T | T | T |
| 0.8736658122081872 | 0.5683210207933951 | 1.0003064563943229 | T | T | T |
| 0.9295689192746428 | 0.5212706316639826 | 0.2064020440460026 | T | T | T |
| 0.8188652041638727 | 0.5604187765014830 | 0.3475741540888135 | T | T | T |
| 0.5796152029116231 | 0.3244160421584716 | 0.3304156359956119 | T | T | T |
| 0.7032594852529341 | 0.3710268140585239 | 0.2117323989546318 | T | T | T |
| 0.7304093112119688 | 0.3273180810839910 | 0.9914184921954712 | T | T | T |
| 0.8877608150997021 | 0.3277524094327345 | 0.9957986856667659 | T | T | T |
| 0.9361457013521147 | 0.3649996882954157 | 0.2065551178531163 | T | T | T |
| 0.8251616181916026 | 0.3279602579214609 | 0.3485838610256972 | T | T | T |
| 0.9238004802609818 | 0.4487215863539804 | 0.8650140765699075 | T | T | T |
| 0.8024234453387717 | 0.4668900448465766 | 0.7227364544645836 | T | T | T |
| 0.7801604250767480 | 0.4409794629892955 | 0.4980010990815799 | T | T | T |
| 0.6201608299264157 | 0.4291719143379224 | 0.4920165604625563 | T | T | T |
| 0.5625442289466658 | 0.4640869646778917 | 0.7019707638892370 | T | T | T |
| 0.6763356104427350 | 0.4281625111285701 | 0.8402674598553599 | T | T | T |
| 0.7954081714848423 | 0.6252580299953087 | 0.7148245358300458 | T | T | T |
| 0.6143594593173317 | 0.6701068337419781 | 0.4908461698204207 | T | T | T |
| 0.5600335354674955 | 0.6217719233720072 | 0.7002501975887845 | T | T | T |
| 0.6686946618763848 | 0.6666864395809724 | 0.8342227568203511 | T | T | T |
| 0.5751783567695196 | 0.9395644976022816 | 0.3523030189705378 | T | T | T |
| 0.6931074951299355 | 0.9707839834798363 | 0.2089936762119380 | T | T | T |
| 0.7187504553043198 | 0.9526915735820977 | 0.9857862305252401 | T | T | T |
| 0.8761342847488620 | 0.9458139382484451 | 0.9834632707025708 | T | T | T |
| 0.9330299649424264 | 0.9684417602168113 | 0.1936334327335640 | T | T | T |
| 0.8174945174626331 | 0.9307592478563189 | 0.3263566260180424 | T | T | T |
| 0.5800970815708777 | 0.1702072605410465 | 0.3202760728857947 | T | T | T |
| 0.7020256892426520 | 0.1271850382702915 | 0.2008554870863906 | T | T | T |
| 0.7346712436031786 | 0.1677831378694418 | 0.9814666664602864 | T | T | T |
| 0.8921429001618687 | 0.1769549559548413 | 0.9752297888173214 | T | T | T |
| 0.9334398785895837 | 0.1260973146821104 | 0.1941230969808692 | T | T | T |
| 0.8227130588751459 | 0.1732859478732017 | 0.3382974960800522 | T | T | T |
| 0.9254549692698559 | 0.0629946720162520 | 0.8405454293975310 | T | T | T |
| 0.8055417731783858 | 0.0295405690687623 | 0.7035214321769532 | T | T | T |

**Structure files (CONTCAR) involved in this work:**

|                    |                    |                    |   |   |   |
|--------------------|--------------------|--------------------|---|---|---|
| 0.7839000077872593 | 0.0527034109802529 | 0.4764275448807501 | T | T | T |
| 0.6238499702983306 | 0.0652492464240362 | 0.4810301253826025 | T | T | T |
| 0.5674859332271527 | 0.0338187713888487 | 0.6910659375793525 | T | T | T |
| 0.6815146421639829 | 0.0672511850299721 | 0.8276606450535817 | T | T | T |
| 0.9168578666895636 | 0.8340965455697845 | 0.8300871423636863 | T | T | T |
| 0.8010991473550335 | 0.8725855671554198 | 0.6987761993250208 | T | T | T |
| 0.7688425987238777 | 0.8323925653508314 | 0.4836666377221541 | T | T | T |
| 0.6130758642316131 | 0.8251183479959664 | 0.4901410848436281 | T | T | T |
| 0.5658224266967075 | 0.8756497423023897 | 0.7024386025371367 | T | T | T |
| 0.4189317288027828 | 0.4436358468944153 | 0.6469982372798863 | T | T | T |
| 0.2982574463754017 | 0.4726146736758528 | 0.7886938871451484 | T | T | T |
| 0.2801312846841573 | 0.4345253332392900 | 0.0106206509937724 | T | T | T |
| 0.1215139088703213 | 0.4318244363462467 | 0.0104479634917733 | T | T | T |
| 0.0699671520759511 | 0.4696844083180119 | 0.8008187625396895 | T | T | T |
| 0.1752812109408080 | 0.4458075216583210 | 0.6482998445863833 | T | T | T |
| 0.4176654473851784 | 0.6710515909988976 | 0.6623044495049825 | T | T | T |
| 0.2993900492576167 | 0.6294990453895479 | 0.8032558405763618 | T | T | T |
| 0.2679312514788260 | 0.6714543522667612 | 0.0252289886362300 | T | T | T |
| 0.1141036854443178 | 0.6715954972152751 | 0.0143215848826885 | T | T | T |
| 0.0626786542775743 | 0.6277558525426428 | 0.8029813587010431 | T | T | T |
| 0.1765133117055920 | 0.6688562795766336 | 0.6664838301120276 | T | T | T |
| 0.0738533524967571 | 0.5534997176547560 | 0.1428609021979738 | T | T | T |
| 0.1959531741774908 | 0.5260153684806249 | 0.2846597681443860 | T | T | T |
| 0.2147068050060873 | 0.5627458002575781 | 0.5073892886006764 | T | T | T |
| 0.3743441076556394 | 0.5654363792585720 | 0.5097844579181624 | T | T | T |
| 0.4297483790399723 | 0.5266419549490615 | 0.3003410347111184 | T | T | T |
| 0.3229393251502388 | 0.5531070427035891 | 0.1471211961586729 | T | T | T |
| 0.0802493708190259 | 0.3234120834006855 | 0.1633936682276206 | T | T | T |
| 0.1975206287824558 | 0.3676390486186943 | 0.3036052185161281 | T | T | T |
| 0.2320436057888530 | 0.3284061771190416 | 0.5230972189397602 | T | T | T |
| 0.3868994983959038 | 0.3258595846341402 | 0.5114311136219903 | T | T | T |
| 0.4362422681440757 | 0.3690340602867703 | 0.2986247304015884 | T | T | T |
| 0.3195171959548253 | 0.3268787170997413 | 0.1683242097324889 | T | T | T |
| 0.3571948013527874 | 0.0592239450726773 | 0.7093325780725291 | T | T | T |
| 0.3002940049828974 | 0.0689380319849369 | 0.8857913730863560 | T | T | T |
| 0.2008546373496774 | 0.0515810251947907 | 0.0173840384064318 | T | T | T |
| 0.1014264605157186 | 0.0712366668069523 | 0.8870073163640384 | T | T | T |
| 0.1038760839540902 | 0.0531373444051457 | 0.6889143063521701 | T | T | T |
| 0.2294339225100179 | 0.0286600062884504 | 0.7297492558201950 | T | T | T |
| 0.3592580239438666 | 0.8290931370593562 | 0.7401833684159688 | T | T | T |
| 0.3015616219723544 | 0.8384833468907470 | 0.9150364813861562 | T | T | T |
| 0.1896730039261304 | 0.8514673250135439 | 0.0202056871200859 | T | T | T |
| 0.0874124532998750 | 0.8293532126440863 | 0.9006109318806075 | T | T | T |
| 0.1017019317063292 | 0.8402722308660141 | 0.7050411714545942 | T | T | T |
| 0.2292298449014841 | 0.8571311048480224 | 0.7516190296976388 | T | T | T |
| 0.3202070030170189 | 0.9479565077173346 | 0.8060906619335043 | T | T | T |
| 0.0893215412109761 | 0.9501826404028156 | 0.8156772260759632 | T | T | T |
| 0.4313418602384392 | 0.1233935668112680 | 0.5753279993458992 | T | T | T |
| 0.4169823993391365 | 0.9916660799541003 | 0.5605450527469076 | T | T | T |
| 0.4004290792350443 | 0.8590839213805250 | 0.5565162858217748 | T | T | T |
| 0.1951676183386570 | 0.1277495049744649 | 0.6045472673904341 | T | T | T |
| 0.1811090285461483 | 0.9998127651176685 | 0.5492712759046777 | T | T | T |
| 0.1902271516276554 | 0.8655091149673098 | 0.5609660658023737 | T | T | T |

**Structure files (CONTCAR) involved in this work:**

|                    |                    |                    |   |   |   |
|--------------------|--------------------|--------------------|---|---|---|
| 0.9919597673614512 | 0.0409818900782474 | 0.7807760844479353 | T | T | T |
| 0.9849665094219046 | 0.8719986157597146 | 0.7933147983885267 | T | T | T |
| 0.1425554909208555 | 0.9411439342256400 | 0.2124571012298659 | T | T | T |
| 0.2011241096118882 | 0.9267720164045435 | 0.3875760712057724 | T | T | T |
| 0.2975884903512191 | 0.9408132549424604 | 0.5252391698492668 | T | T | T |
| 0.3940649422496316 | 0.9273134694270909 | 0.3891891753360684 | T | T | T |
| 0.3965028569884907 | 0.9478397120076000 | 0.1920957238922800 | T | T | T |
| 0.2702693029345959 | 0.9713080950830214 | 0.2314211391363434 | T | T | T |
| 0.1397542146285770 | 0.1658104806168144 | 0.2386738139968709 | T | T | T |
| 0.1955596762846064 | 0.1640941577562765 | 0.4129375696829890 | T | T | T |
| 0.3092698172320795 | 0.1474437283586399 | 0.5098484012286266 | T | T | T |
| 0.4127949532949438 | 0.1724143834867280 | 0.3920826421477754 | T | T | T |
| 0.3948102216485133 | 0.1531163929513137 | 0.1978746402390184 | T | T | T |
| 0.2693268154371765 | 0.1380994734331253 | 0.2517561562721204 | T | T | T |
| 0.1795060181350661 | 0.0493993716130494 | 0.3147737887585139 | T | T | T |
| 0.4154314381765681 | 0.0487057966299834 | 0.3202337134845146 | T | T | T |
| 0.0668324429522784 | 0.8717502984518426 | 0.0879328464554503 | T | T | T |
| 0.0820959023119248 | 0.0019228593236942 | 0.0563248449545298 | T | T | T |
| 0.0992089034458488 | 0.1342030204014887 | 0.0561743666970355 | T | T | T |
| 0.3059761853761817 | 0.8715658472818122 | 0.1078459847470096 | T | T | T |
| 0.3192581437687724 | 0.9988596711960730 | 0.0507866019612141 | T | T | T |
| 0.3027078759733797 | 0.1324871367502327 | 0.0579066388345477 | T | T | T |
| 0.5075380572710055 | 0.9528076243391780 | 0.2890141552452042 | T | T | T |
| 0.5139810939716853 | 0.1324613079099498 | 0.2775960611053055 | T | T | T |
| 0.6369923950217197 | 0.5680174212849329 | 0.2756642063804325 | T | T | T |
| 0.6861358606275185 | 0.5437995468288775 | 0.0978922229588447 | T | T | T |
| 0.7956410795864785 | 0.5491396502125521 | 0.9828590135728577 | T | T | T |
| 0.8925902881350072 | 0.5626500751551226 | 0.1175822148677653 | T | T | T |
| 0.8948039174683797 | 0.5420949661688170 | 0.3112021637315905 | T | T | T |
| 0.7693091084073819 | 0.5555496615979928 | 0.2499397908410717 | T | T | T |
| 0.6427371256649469 | 0.3259403591382057 | 0.2545368882569299 | T | T | T |
| 0.7038253128971252 | 0.3639811743521920 | 0.0917234714369501 | T | T | T |
| 0.8091593111700250 | 0.3456354110989909 | 0.9799094941153541 | T | T | T |
| 0.9067131384501685 | 0.3214216780461465 | 0.1137798615048217 | T | T | T |
| 0.9013757527599522 | 0.3409448009490328 | 0.3099761436887413 | T | T | T |
| 0.7743364724121418 | 0.3464774789412946 | 0.2572261452995881 | T | T | T |
| 0.6901525500900048 | 0.4491344987470762 | 0.2410831793354888 | T | T | T |
| 0.9180453950873814 | 0.4428106779501313 | 0.1828566816496185 | T | T | T |
| 0.5647456866556336 | 0.6236938095273665 | 0.4215750464533276 | T | T | T |
| 0.5940885801099965 | 0.4935090645819937 | 0.4291472648504847 | T | T | T |
| 0.6001040050435145 | 0.3600204077984072 | 0.4350026085669956 | T | T | T |
| 0.8192473501051426 | 0.6372529342790250 | 0.3875875686279298 | T | T | T |
| 0.7951086789283208 | 0.5071863819134572 | 0.4311498867978968 | T | T | T |
| 0.8107488941887093 | 0.3740347499509265 | 0.4457003287010045 | T | T | T |
| 0.0077291589176422 | 0.5424525161340356 | 0.2118153759643515 | T | T | T |
| 0.0164933017484396 | 0.3585406474705453 | 0.2179550816577789 | T | T | T |
| 0.8607069216097279 | 0.4339017628520310 | 0.7922822120338725 | T | T | T |
| 0.8160515637928937 | 0.4496707669247342 | 0.6059531365702857 | T | T | T |
| 0.7001048008457501 | 0.4328756447593720 | 0.5088453274351509 | T | T | T |
| 0.5839061629488707 | 0.4263183927920828 | 0.5998281961402743 | T | T | T |
| 0.6010687333627110 | 0.4299295349433255 | 0.7961966687179318 | T | T | T |
| 0.7304479629566830 | 0.4333988323592988 | 0.7506846577053622 | T | T | T |
| 0.8432472226396833 | 0.6686215388938224 | 0.7852256123104084 | T | T | T |



**Structure files (CONTCAR) involved in this work:**

|                    |                    |                    |   |   |   |
|--------------------|--------------------|--------------------|---|---|---|
| 0.8071380691166196 | 0.6323025094783203 | 0.5979735055076314 | T | T | T |
| 0.6898387587019374 | 0.6455589576630044 | 0.4781065102951606 | T | T | T |
| 0.5881400124098309 | 0.6639282530249738 | 0.6066552815139226 | T | T | T |
| 0.5919754020952031 | 0.6524935212689058 | 0.8043438201680507 | T | T | T |
| 0.7173548158768267 | 0.6477659890223214 | 0.7442873295468954 | T | T | T |
| 0.8004699958680273 | 0.5459806770190642 | 0.7479011598677033 | T | T | T |
| 0.5820803373375802 | 0.5432720951330535 | 0.6935616607616137 | T | T | T |
| 0.9317484539244327 | 0.3865177984069267 | 0.9436103273876907 | T | T | T |
| 0.9166645696669153 | 0.5184444255916015 | 0.9296571991597854 | T | T | T |
| 0.8919691115063839 | 0.6476006040333807 | 0.9759226010362699 | T | T | T |
| 0.6876760992515470 | 0.3578968910987074 | 0.8991475912284195 | T | T | T |
| 0.6844098143649191 | 0.4922142333157291 | 0.9159893688284607 | T | T | T |
| 0.6883252122258164 | 0.6240479007580055 | 0.9409214949990072 | T | T | T |
| 0.4828466444815656 | 0.4549813749555249 | 0.7199878742059798 | T | T | T |
| 0.4794481533551193 | 0.6280631014725665 | 0.7094322928148703 | T | T | T |
| 0.6363812557984865 | 0.9321721293028513 | 0.2728297720580175 | T | T | T |
| 0.6781448504929455 | 0.9625967902511875 | 0.0897778770418041 | T | T | T |
| 0.7981009847907816 | 0.9632823940091432 | 0.0086611658800307 | T | T | T |
| 0.9146790819054526 | 0.9324378243691527 | 0.0879629995675359 | T | T | T |
| 0.8935898370612037 | 0.9311735364818791 | 0.2836114796275371 | T | T | T |
| 0.7659828580771624 | 0.9374045536379936 | 0.2314465570442471 | T | T | T |
| 0.6357351794137918 | 0.1693777162008262 | 0.2313274592987146 | T | T | T |
| 0.7115040457884146 | 0.1267971973666037 | 0.0806330449337721 | T | T | T |
| 0.8138849674447085 | 0.1563704844018084 | 0.9615364769014967 | T | T | T |
| 0.9130709592211423 | 0.1629340478510944 | 0.0904055788770938 | T | T | T |
| 0.8961390036951911 | 0.1613054668751248 | 0.2885675734612393 | T | T | T |
| 0.7673646014881236 | 0.1613782197514050 | 0.2510157901744515 | T | T | T |
| 0.6937597509094622 | 0.0500329158340931 | 0.2396764068366121 | T | T | T |
| 0.9118287076551430 | 0.0473143590643989 | 0.1889542404844768 | T | T | T |
| 0.5660939003788412 | 0.8717909369819626 | 0.4182062075135774 | T | T | T |
| 0.5873736192478606 | 0.0027932640934236 | 0.4263459535660816 | T | T | T |
| 0.6096683334268239 | 0.1340906610025125 | 0.4195232489812604 | T | T | T |
| 0.8060913815507353 | 0.8600858103351126 | 0.3824363612884873 | T | T | T |
| 0.8070201252889706 | 0.9941277053939350 | 0.4003152206490512 | T | T | T |
| 0.8102062023904141 | 0.1243032324610897 | 0.4330150238961262 | T | T | T |
| 0.0125823483185885 | 0.9591568132981927 | 0.2133517113106692 | T | T | T |
| 0.0137338742224577 | 0.1319273167192177 | 0.2104118391334691 | T | T | T |
| 0.8637901446833796 | 0.0698859272405937 | 0.7632717328626774 | T | T | T |
| 0.8175433829871899 | 0.0404070891496359 | 0.5849861874281594 | T | T | T |
| 0.7034650565029574 | 0.0522609932264496 | 0.4876689300966154 | T | T | T |
| 0.5925939689835512 | 0.0737532021308392 | 0.5918854461752407 | T | T | T |
| 0.6054120984940301 | 0.0660072815233535 | 0.7874799390522996 | T | T | T |
| 0.7333234359741133 | 0.0614404744328128 | 0.7345333752323869 | T | T | T |
| 0.8682634985082066 | 0.8319840545892561 | 0.7330416677011884 | T | T | T |
| 0.7983101267717687 | 0.8754215198060333 | 0.5776528939317461 | T | T | T |
| 0.6893906981968276 | 0.8506173236329861 | 0.4737202377039150 | T | T | T |
| 0.5916165065667318 | 0.8319827129387681 | 0.6067062740521847 | T | T | T |
| 0.6003985017552025 | 0.8518145434948183 | 0.8049937074875160 | T | T | T |
| 0.7364604471740365 | 0.8378649427021034 | 0.7471750450657302 | T | T | T |
| 0.8082634621738740 | 0.9511134740499683 | 0.7368054333997446 | T | T | T |
| 0.5837402492559325 | 0.9544450388590212 | 0.6794393565623413 | T | T | T |
| 0.9374631764806862 | 0.1342527704288989 | 0.8972929361914050 | T | T | T |
| 0.9105682032684479 | 0.0081430709645224 | 0.9274701273017880 | T | T | T |

**Structure files (CONTCAR) involved in this work:**

|                    |                    |                    |   |   |   |
|--------------------|--------------------|--------------------|---|---|---|
| 0.8785802016997067 | 0.8777264238533163 | 0.9179547602950264 | T | T | T |
| 0.6933341476628163 | 0.1372529171348120 | 0.8876659497114193 | T | T | T |
| 0.6915463433162291 | 0.0024567087547267 | 0.9011649923507444 | T | T | T |
| 0.7113210244727302 | 0.8731306709120400 | 0.9506750267632695 | T | T | T |
| 0.4880084430837757 | 0.0452555265408132 | 0.7086342889882977 | T | T | T |
| 0.4846635033516182 | 0.8666517839800885 | 0.7111573657704718 | T | T | T |
| 0.3523833473037685 | 0.4377602653300834 | 0.7151896663173319 | T | T | T |
| 0.2955623089202485 | 0.4297271582483517 | 0.8919528085576314 | T | T | T |
| 0.2004777906288938 | 0.4444878565342124 | 0.0312270448566711 | T | T | T |
| 0.1057491740579593 | 0.4289067579522922 | 0.8920997905400487 | T | T | T |
| 0.1004803681405452 | 0.4432389951554272 | 0.6952005662566028 | T | T | T |
| 0.2254920609259985 | 0.4715320322254912 | 0.7357728112175361 | T | T | T |
| 0.3558065301732725 | 0.6692466642860235 | 0.7402711765499778 | T | T | T |
| 0.2980019042464935 | 0.6619689729134877 | 0.9139621383308868 | T | T | T |
| 0.1905912927997889 | 0.6456598034304756 | 0.0288298691033218 | T | T | T |
| 0.0940931089061436 | 0.6689805142999661 | 0.8979894046365696 | T | T | T |
| 0.0998134193130223 | 0.6567907989658978 | 0.7024855594315339 | T | T | T |
| 0.2267438668869562 | 0.6379972377458567 | 0.7508126666835113 | T | T | T |
| 0.3188123776867767 | 0.5502376059950849 | 0.8108712190418313 | T | T | T |
| 0.0841597417061231 | 0.5490475061698199 | 0.8166899583929081 | T | T | T |
| 0.4296104274998541 | 0.3739784103614358 | 0.5854129619979198 | T | T | T |
| 0.4141440106716244 | 0.5056483555847729 | 0.5677596046906283 | T | T | T |
| 0.3946531249739477 | 0.6379599744283732 | 0.5565010925095376 | T | T | T |
| 0.1959737746910650 | 0.3713019699315937 | 0.6104969183632795 | T | T | T |
| 0.1766061040393265 | 0.4978682141747520 | 0.5546313881073998 | T | T | T |
| 0.1897731645788273 | 0.6318717517206351 | 0.5597255454867968 | T | T | T |
| 0.9905089874265748 | 0.4539216461985159 | 0.7977323599014824 | T | T | T |
| 0.9834964021568255 | 0.6366864493897033 | 0.7990825565321102 | T | T | T |
| 0.1384262764031033 | 0.5587921655168717 | 0.2147000445010400 | T | T | T |
| 0.1964877015211112 | 0.5668652826667772 | 0.3894445457790255 | T | T | T |
| 0.2946959514271417 | 0.5525914642365729 | 0.5232532814686272 | T | T | T |
| 0.3949366952342718 | 0.5663267966238666 | 0.3928135981090347 | T | T | T |
| 0.3970499923975598 | 0.5519210076791741 | 0.1959221789972727 | T | T | T |
| 0.2684447341375699 | 0.5332162753770224 | 0.2321282691065868 | T | T | T |
| 0.1434413072631897 | 0.3257904139505601 | 0.2386257077932593 | T | T | T |
| 0.1942195280108381 | 0.3402326913362045 | 0.4172598393952696 | T | T | T |
| 0.3096291770161427 | 0.3517801654538928 | 0.5111100467860576 | T | T | T |
| 0.4165345102910264 | 0.3278443137240848 | 0.3988736515211975 | T | T | T |
| 0.3967925685689547 | 0.3381269188237049 | 0.2026059619742496 | T | T | T |
| 0.2717158719335327 | 0.3561462361624396 | 0.2570331591533205 | T | T | T |
| 0.1788934340471728 | 0.4470661665785913 | 0.3019850503890235 | T | T | T |
| 0.4154824582797254 | 0.4468989030070120 | 0.3151667409706692 | T | T | T |
| 0.0651130376876617 | 0.6243139773177551 | 0.0824813280530065 | T | T | T |
| 0.0795072408610780 | 0.4926384644619547 | 0.0625636374218750 | T | T | T |
| 0.0982836784023033 | 0.3609407923620505 | 0.0591513352600883 | T | T | T |
| 0.3105464933410387 | 0.6284477043970639 | 0.1054563743398631 | T | T | T |
| 0.3194208326819818 | 0.4992437771343076 | 0.0558245195928629 | T | T | T |
| 0.3052932374009822 | 0.3655604223734902 | 0.0635051386595265 | T | T | T |
| 0.5092471433809116 | 0.5404738371975280 | 0.2936215103903664 | T | T | T |
| 0.5161891376532803 | 0.3623170970360442 | 0.2787601703715475 | T | T | T |
| 0.4406034098859677 | 0.7479937113766977 | 0.6432692867057899 | T | T | T |
| 0.1915426682621633 | 0.7482209180806728 | 0.6503837763170461 | T | T | T |
| 0.2725800797277270 | 0.7497864758683684 | 0.0569585853883417 | T | T | T |

**Structure files (CONTCAR) involved in this work:**

|                    |                    |                    |   |   |   |
|--------------------|--------------------|--------------------|---|---|---|
| 0.1059411938469920 | 0.7483870886558311 | 0.0546391731698889 | T | T | T |
| 0.0607439944865286 | 0.2466870405272140 | 0.1367159937872575 | T | T | T |
| 0.3050123090796916 | 0.2477895246786605 | 0.1507526721912733 | T | T | T |
| 0.2279505659065605 | 0.2500983250923187 | 0.5554628593042492 | T | T | T |
| 0.3920094449832986 | 0.2488752846342146 | 0.5509906479625059 | T | T | T |
| 0.5609387036395541 | 0.2465548780659060 | 0.3511483891625833 | T | T | T |
| 0.8169382729018583 | 0.2497296699890785 | 0.3798144244156415 | T | T | T |
| 0.7182427125986734 | 0.2469613338213669 | 0.9959393218997402 | T | T | T |
| 0.9039491726539022 | 0.2552664180507048 | 0.9461715350693100 | T | T | T |
| 0.9322376678423734 | 0.7621547208474005 | 0.8787655332000334 | T | T | T |
| 0.6776957623595392 | 0.7418749539110946 | 0.8844067717821426 | T | T | T |
| 0.6029578036060924 | 0.7477388142820792 | 0.4559911839367946 | T | T | T |
| 0.7731387617592818 | 0.6719843903642028 | 0.0975093449251201 | T | T | T |
| 0.6955663943918200 | 0.7770631873198749 | 0.1002255917178084 | T | T | T |
| 0.8323189497923301 | 0.7947410082054088 | 0.1227354350726040 | T | T | T |
| 0.7834919962792782 | 0.7545652874717858 | 0.4929031712936767 | T | T | T |
| 0.9162664163212276 | 0.6787640199252516 | 0.8502560977917946 | T | T | T |
| 0.6793691775053542 | 0.8286538498904809 | 0.8417428881910649 | T | T | T |
| 0.7732139037986466 | 0.6690135494055717 | 0.4925506375717413 | T | T | T |
| 0.7031894464501273 | 0.7054774844414868 | 0.0207502096216358 | T | T | T |
| 0.7647754935029816 | 0.8258282521576992 | 0.0525029608825674 | T | T | T |
| 0.8655077963045035 | 0.7171145861616274 | 0.0743219488416688 | T | T | T |
| 0.9501015733151610 | 0.7384495799558162 | 0.1583542029914379 | T | T | T |
| 0.8814888648107910 | 0.6983924730555230 | 0.2742977922315623 | T | T | T |
| 0.9583080291300577 | 0.7706344104054977 | 0.0919615121382871 | T | T | T |
| 0.9544536238063741 | 0.7726530024546446 | 0.2221682034775207 | T | T | T |
| 0.9818463912299931 | 0.6937553611419609 | 0.1580194613894829 | T | T | T |
| 0.8446055159892615 | 0.7384645733718416 | 0.2783582186917166 | T | T | T |
| 0.9217626348625844 | 0.6976962951630814 | 0.3288564410164812 | T | T | T |
| 0.8728071301798629 | 0.6529135431723474 | 0.2317673617711675 | T | T | T |
| 0.7622870185327647 | 0.6854175783594068 | 0.1662589083523199 | T | T | T |

**Figure 5(b) TS2**

Si O Al Cu C H

1.0000000000000000

20.0219993591000005 0.0000000000000000 0.0000000000000000

0.0000000000000000 19.8990001678000006 0.0000000000000000

0.0000000000000000 0.0000000000000000 13.3830003737999998

93 195 3 3 2 7

Selective dynamics

Direct

|                    |                    |                    |   |   |   |
|--------------------|--------------------|--------------------|---|---|---|
| 0.4217442876854557 | 0.0523567619909481 | 0.6423833314398182 | T | T | T |
| 0.2998257362404169 | 0.0251891985912590 | 0.7856680666757074 | T | T | T |
| 0.2782187212404535 | 0.0623173009586991 | 0.0057652678959148 | T | T | T |
| 0.1186052852680110 | 0.0629698674104559 | 0.0078475420723274 | T | T | T |
| 0.0645206963533640 | 0.0204452556278119 | 0.7984919595055017 | T | T | T |
| 0.1731953399780983 | 0.0493091076700447 | 0.6469719352249322 | T | T | T |
| 0.4186847730463799 | 0.8257341170925362 | 0.6616976086237089 | T | T | T |
| 0.3017489660455637 | 0.8676807688420777 | 0.8052634198487634 | T | T | T |
| 0.2670756850256709 | 0.8260619041220595 | 0.0252345740755661 | T | T | T |
| 0.1130288016110348 | 0.8238368197122270 | 0.0146768101974235 | T | T | T |
| 0.0649909589736060 | 0.8604550561178952 | 0.7980682304335522 | T | T | T |
| 0.1828424735987716 | 0.8246308185253139 | 0.6659660171110207 | T | T | T |
| 0.0753322467480384 | 0.9417973606680036 | 0.1457609177474704 | T | T | T |

**Structure files (CONTCAR) involved in this work:**

|                    |                    |                    |   |   |   |
|--------------------|--------------------|--------------------|---|---|---|
| 0.1963085175754195 | 0.9707188869372797 | 0.2866618072323698 | T | T | T |
| 0.2172715672418035 | 0.9328357217221181 | 0.5077956730032668 | T | T | T |
| 0.3756345585042593 | 0.9301573219192019 | 0.5086812810339643 | T | T | T |
| 0.4269467656543999 | 0.9697124857868923 | 0.2987378226698664 | T | T | T |
| 0.3203960216289585 | 0.9456791449636927 | 0.1458493485601179 | T | T | T |
| 0.0785836072332163 | 0.1710156537608754 | 0.1601863095857629 | T | T | T |
| 0.1952707057508057 | 0.1277722658842204 | 0.3033610904851240 | T | T | T |
| 0.2269022074281441 | 0.1690568008945963 | 0.5235175019266586 | T | T | T |
| 0.3817480616546224 | 0.1704805438810184 | 0.5107465745148325 | T | T | T |
| 0.4311864671530558 | 0.1267843326031149 | 0.2996055552626263 | T | T | T |
| 0.3165574979220903 | 0.1679126442036534 | 0.1672250198372582 | T | T | T |
| 0.5751438714401339 | 0.5571909602493127 | 0.3531017476837023 | T | T | T |
| 0.6914339019649365 | 0.5292755970781401 | 0.2116245784532267 | T | T | T |
| 0.7143902551107031 | 0.5466489441135938 | 0.9849273937666493 | T | T | T |
| 0.8721854050970257 | 0.5626641122099794 | 0.9915426121448938 | T | T | T |
| 0.9304315329916930 | 0.5280634351773196 | 0.1996342257678649 | T | T | T |
| 0.8152692029120576 | 0.5640537940514899 | 0.3344804239827885 | T | T | T |
| 0.5788821696126242 | 0.3253179376428332 | 0.3285465265873893 | T | T | T |
| 0.6989890520384122 | 0.3724800311504453 | 0.2081281675604239 | T | T | T |
| 0.7309982203104949 | 0.3294367459643893 | 0.9881354251011882 | T | T | T |
| 0.8869072862139485 | 0.3282429671657702 | 0.9919123993340442 | T | T | T |
| 0.9341747518771070 | 0.3710724014066800 | 0.2026687313128876 | T | T | T |
| 0.8226955207229949 | 0.3325163874179020 | 0.3465848543214229 | T | T | T |
| 0.9236473584262515 | 0.4442717789220475 | 0.8551564886488899 | T | T | T |
| 0.8027007282567837 | 0.4697367584789012 | 0.7173227380806124 | T | T | T |
| 0.7806752156074478 | 0.4458004798087081 | 0.4917863664334322 | T | T | T |
| 0.6211864632797287 | 0.4315426029978786 | 0.4884929895684658 | T | T | T |
| 0.5625520241711749 | 0.4627461735496170 | 0.6985054956798453 | T | T | T |
| 0.6768013755573241 | 0.4283445762682319 | 0.8348574649697830 | T | T | T |
| 0.7928714563307425 | 0.6236749105943523 | 0.6979741150528328 | T | T | T |
| 0.6047509653937401 | 0.6720199092448784 | 0.4866662238215964 | T | T | T |
| 0.5601524542865013 | 0.6210178197075639 | 0.7011887942122956 | T | T | T |
| 0.6715522531970129 | 0.6660496489709635 | 0.8343087526019193 | T | T | T |
| 0.5730920351630184 | 0.9430740560964026 | 0.3525239658133283 | T | T | T |
| 0.6935500899174230 | 0.9749193975178938 | 0.2121708944090888 | T | T | T |
| 0.7133879325057296 | 0.9503068046604212 | 0.9860610167561643 | T | T | T |
| 0.8758263144178747 | 0.9445532469060790 | 0.9837978703689433 | T | T | T |
| 0.9324370495022618 | 0.9697160454402387 | 0.2001342699186968 | T | T | T |
| 0.8153387988306845 | 0.9298811507273759 | 0.3297589999993404 | T | T | T |
| 0.5774953895654616 | 0.1715277490724013 | 0.3273530895436569 | T | T | T |
| 0.7007043777585376 | 0.1306841499511576 | 0.2027320376037735 | T | T | T |
| 0.7329474370109663 | 0.1688576811676433 | 0.9837192094267372 | T | T | T |
| 0.8900412908867936 | 0.1750832426939037 | 0.9805903172193614 | T | T | T |
| 0.9352260609276264 | 0.1281426622078360 | 0.2004435740138583 | T | T | T |
| 0.8213080970860153 | 0.1778209567836352 | 0.3349936787255903 | T | T | T |
| 0.9175019265347584 | 0.0640129123491743 | 0.8426096129413496 | T | T | T |
| 0.8041825562571965 | 0.0339841286112074 | 0.6990704154941745 | T | T | T |
| 0.7817105699981568 | 0.0553787292095891 | 0.4722028829466979 | T | T | T |
| 0.6217725133227233 | 0.0663391155352487 | 0.4851116434755511 | T | T | T |
| 0.5675015740872853 | 0.0322351117217455 | 0.6970206460940362 | T | T | T |
| 0.6832951673505979 | 0.0689145801939973 | 0.8283150826111784 | T | T | T |
| 0.9149512798301099 | 0.8291914866262949 | 0.8292126812421982 | T | T | T |
| 0.7949712356756421 | 0.8764886028467640 | 0.7034539213262884 | T | T | T |

**Structure files (CONTCAR) involved in this work:**

|                    |                    |                    |   |   |   |
|--------------------|--------------------|--------------------|---|---|---|
| 0.7653501386765171 | 0.8283893605115833 | 0.4870571877493720 | T | T | T |
| 0.6073861020106917 | 0.8242075167109348 | 0.4873603621737490 | T | T | T |
| 0.5618719705774550 | 0.8740128449553319 | 0.7017128870701914 | T | T | T |
| 0.4194917469517752 | 0.4415527031761601 | 0.6442522138940989 | T | T | T |
| 0.3001471559317995 | 0.4707849070590943 | 0.7879520612351835 | T | T | T |
| 0.2797068001403156 | 0.4338004328059831 | 0.0088098741558071 | T | T | T |
| 0.1204606042129157 | 0.4328752503015717 | 0.0082220731608761 | T | T | T |
| 0.0689123947408485 | 0.4711710462196163 | 0.7975589471045988 | T | T | T |
| 0.1769710883033709 | 0.4450657716314375 | 0.6480403392406294 | T | T | T |
| 0.4185443198978669 | 0.6705179795962896 | 0.6647294062679671 | T | T | T |
| 0.3018459056435900 | 0.6272801585113874 | 0.8060924483238366 | T | T | T |
| 0.2672748321450246 | 0.6692685047019582 | 0.0263551951946712 | T | T | T |
| 0.1131362194799836 | 0.6713423230234020 | 0.0141160899973419 | T | T | T |
| 0.0640613758538431 | 0.6299867337112122 | 0.7997434758039154 | T | T | T |
| 0.1816560167921943 | 0.6671789241447329 | 0.6676715135163517 | T | T | T |
| 0.0746684529579186 | 0.5540841865882373 | 0.1437782031671797 | T | T | T |
| 0.1960218690522801 | 0.5246357341018050 | 0.2856817359481743 | T | T | T |
| 0.2181484997188237 | 0.5611240579486771 | 0.5064540401720224 | T | T | T |
| 0.3777435272899161 | 0.5647342093313849 | 0.5087995977764438 | T | T | T |
| 0.4303482241473441 | 0.5252254537733971 | 0.2990938664861899 | T | T | T |
| 0.3217940437964978 | 0.5505554453046909 | 0.1481146589557628 | T | T | T |
| 0.0782517558470436 | 0.3254339374660423 | 0.1620060097329642 | T | T | T |
| 0.1948301218047314 | 0.3671681385120044 | 0.3053220298058105 | T | T | T |
| 0.2290474568312942 | 0.3256816577922902 | 0.5238609209123944 | T | T | T |
| 0.3842168882638042 | 0.3232392102748992 | 0.5106521518922719 | T | T | T |
| 0.4340218320120729 | 0.3682301825781639 | 0.2996816993623432 | T | T | T |
| 0.3169010994186912 | 0.3268023115830078 | 0.1695505644027532 | T | T | T |
| 0.3562610266861139 | 0.0570770449829627 | 0.7133143794543747 | T | T | T |
| 0.2971005733298019 | 0.0688195642895772 | 0.8883296803888844 | T | T | T |
| 0.1982187296203063 | 0.0509964454181929 | 0.0208189459784741 | T | T | T |
| 0.0975216642676875 | 0.0614150986924258 | 0.8911762327271133 | T | T | T |
| 0.0985251703726089 | 0.0465578468053500 | 0.6953556975150675 | T | T | T |
| 0.2270489807384232 | 0.0283678817043129 | 0.7323614374775900 | T | T | T |
| 0.3579474946391569 | 0.8284324970474455 | 0.7417974131195039 | T | T | T |
| 0.3014642841729918 | 0.8365213566660912 | 0.9168952232227138 | T | T | T |
| 0.1894778778440060 | 0.8510401448348861 | 0.0208318224262588 | T | T | T |
| 0.0893595697808111 | 0.8230042385104395 | 0.8991563309735480 | T | T | T |
| 0.1054786116952646 | 0.8341514369958297 | 0.7006707246432430 | T | T | T |
| 0.2289021520010619 | 0.8571821085301158 | 0.7537511961351278 | T | T | T |
| 0.3182509554200840 | 0.9475104882634716 | 0.8105976257538524 | T | T | T |
| 0.0764859291453533 | 0.9404783908469472 | 0.8136888980446140 | T | T | T |
| 0.4281548074155336 | 0.1213218949353846 | 0.5778243287478425 | T | T | T |
| 0.4175583293897635 | 0.9890161267208962 | 0.5653578332989770 | T | T | T |
| 0.3937790101938898 | 0.8571232304545957 | 0.5554627885284672 | T | T | T |
| 0.1871604865887976 | 0.1248862726301664 | 0.6063715313496899 | T | T | T |
| 0.1764021531773318 | 0.9959802625470174 | 0.5549689552784286 | T | T | T |
| 0.1952609058968365 | 0.8625793714637274 | 0.5600657172854833 | T | T | T |
| 0.9843988361423751 | 0.0328353204882322 | 0.7935070634313826 | T | T | T |
| 0.9873853423738657 | 0.8411792295417696 | 0.7788325202340601 | T | T | T |
| 0.1411683270161654 | 0.9355975772184563 | 0.2149059408173768 | T | T | T |
| 0.1994781735176706 | 0.9279954501815029 | 0.3897503293050239 | T | T | T |
| 0.2965894283764517 | 0.9460621367545187 | 0.5246492460683874 | T | T | T |
| 0.3940703868328757 | 0.9277674041968617 | 0.3907477761268378 | T | T | T |

**Structure files (CONTCAR) involved in this work:**

|                    |                    |                    |   |   |   |
|--------------------|--------------------|--------------------|---|---|---|
| 0.3948422892563790 | 0.9468845319686203 | 0.1928191581280772 | T | T | T |
| 0.2684674422823570 | 0.9693473827583206 | 0.2322716176597144 | T | T | T |
| 0.1419903402609198 | 0.1677600957173663 | 0.2347698252154664 | T | T | T |
| 0.1923540429777247 | 0.1592010228719906 | 0.4147121364451701 | T | T | T |
| 0.3045239938182476 | 0.1445568072801632 | 0.5178218144137503 | T | T | T |
| 0.4062397436656137 | 0.1702013620243302 | 0.3952136732411299 | T | T | T |
| 0.3939881385050352 | 0.1545349315003084 | 0.1993424160486958 | T | T | T |
| 0.2694832920639839 | 0.1372714489025459 | 0.2558492966359130 | T | T | T |
| 0.1757035349862888 | 0.0484535839020682 | 0.3079211961118822 | T | T | T |
| 0.4120746077010287 | 0.0487669994652904 | 0.3193724576181283 | T | T | T |
| 0.0657632029908563 | 0.8724066893327099 | 0.0825038886691329 | T | T | T |
| 0.0790393431937287 | 0.0039070524208346 | 0.0673641602780114 | T | T | T |
| 0.0965225455653602 | 0.1349466821391520 | 0.0543397419219572 | T | T | T |
| 0.3054006723872049 | 0.8695487168264434 | 0.1096101473829383 | T | T | T |
| 0.3165425255560473 | 0.9971567065996398 | 0.0516111909357921 | T | T | T |
| 0.3007399966945303 | 0.1311124987986202 | 0.0614484799960538 | T | T | T |
| 0.5060671289489517 | 0.9556649648900070 | 0.2878146446489624 | T | T | T |
| 0.5114159405173078 | 0.1336918118026321 | 0.2845384021553825 | T | T | T |
| 0.6367248947540894 | 0.5711168295287821 | 0.2756141598653606 | T | T | T |
| 0.6788002459651754 | 0.5451178743410452 | 0.0929570302012251 | T | T | T |
| 0.7944556480780536 | 0.5389434668700320 | 0.9928038306168098 | T | T | T |
| 0.9027631723517094 | 0.5693517951793303 | 0.1027210530650463 | T | T | T |
| 0.8928513591517225 | 0.5526502566985380 | 0.2993465979043866 | T | T | T |
| 0.7677577779875721 | 0.5505071587092857 | 0.2356324970478617 | T | T | T |
| 0.6393423202576956 | 0.3243362312502387 | 0.2475234304862096 | T | T | T |
| 0.7029901664578823 | 0.3654588367608060 | 0.0879759943829840 | T | T | T |
| 0.8092397433462311 | 0.3496709112032063 | 0.9765153161231176 | T | T | T |
| 0.9063020152032776 | 0.3266005738335119 | 0.1096280838083503 | T | T | T |
| 0.8979971496292501 | 0.3466694246369200 | 0.3049268699667722 | T | T | T |
| 0.7699226434298616 | 0.3514079949564607 | 0.2578606918881017 | T | T | T |
| 0.6804464427843301 | 0.4497461947140998 | 0.2355849266372236 | T | T | T |
| 0.9168278384620550 | 0.4489473810796829 | 0.1782337693374806 | T | T | T |
| 0.5566681698939384 | 0.6230685953249907 | 0.4187233751307625 | T | T | T |
| 0.5929203481198729 | 0.4954535606096512 | 0.4275015544617921 | T | T | T |
| 0.6038330468470513 | 0.3623201107062167 | 0.4296058835477752 | T | T | T |
| 0.8061358923124807 | 0.6390179361326260 | 0.3728126245472725 | T | T | T |
| 0.7970347281869569 | 0.5062237436852985 | 0.4158716943578431 | T | T | T |
| 0.8097339039255684 | 0.3755393959762486 | 0.4468670276442379 | T | T | T |
| 0.0096626785415116 | 0.5427883133400249 | 0.2141384218327411 | T | T | T |
| 0.0143966071204964 | 0.3616767877938307 | 0.2146082054672548 | T | T | T |
| 0.8599878295752714 | 0.4317508164124382 | 0.7829622626576932 | T | T | T |
| 0.8161159269753976 | 0.4573397347568609 | 0.5995749558876396 | T | T | T |
| 0.7006144326448223 | 0.4385914132139878 | 0.5058538685382484 | T | T | T |
| 0.5841258116248470 | 0.4260267682639671 | 0.5956576804790936 | T | T | T |
| 0.6014426171296922 | 0.4280810398300124 | 0.7917402696937101 | T | T | T |
| 0.7302917708070068 | 0.4368910536624608 | 0.7449493515709358 | T | T | T |
| 0.8488578856849968 | 0.6738565549305818 | 0.7397488373306776 | T | T | T |
| 0.7902644024650897 | 0.6174237834192111 | 0.5802912325464047 | T | T | T |
| 0.6805162151293068 | 0.6541592794328969 | 0.4663895204697659 | T | T | T |
| 0.5845169813567919 | 0.6630251793915385 | 0.6051297362362141 | T | T | T |
| 0.5951894345957692 | 0.6501581555349175 | 0.8042164050125368 | T | T | T |
| 0.7198688207854714 | 0.6505814944418173 | 0.7427772853367992 | T | T | T |
| 0.8037957224242855 | 0.5485678129253103 | 0.7491570523212013 | T | T | T |

**Structure files (CONTCAR) involved in this work:**

|                    |                    |                    |   |   |   |
|--------------------|--------------------|--------------------|---|---|---|
| 0.5808417686835686 | 0.5423045398332342 | 0.6921145562321300 | T | T | T |
| 0.9333899802622730 | 0.3804048952381529 | 0.9300370643106081 | T | T | T |
| 0.9150277240591342 | 0.5112390514151766 | 0.9241928895977081 | T | T | T |
| 0.8809509273231617 | 0.6374546101846941 | 0.9402679650121524 | T | T | T |
| 0.6893993248717534 | 0.3581748059541313 | 0.8935101596763274 | T | T | T |
| 0.6825847082584459 | 0.4920763996834812 | 0.9114362864052954 | T | T | T |
| 0.6962060713633547 | 0.6230740083805317 | 0.9378959624307832 | T | T | T |
| 0.4832262956378242 | 0.4517598492412748 | 0.7177090207373020 | T | T | T |
| 0.4799127960523891 | 0.6289800095834267 | 0.7157098208705895 | T | T | T |
| 0.6345655045065933 | 0.9378834584283957 | 0.2729960725539670 | T | T | T |
| 0.6808535513887702 | 0.9716760387045479 | 0.0917788281373172 | T | T | T |
| 0.7948060457886457 | 0.9321683478655050 | 0.0064949500984377 | T | T | T |
| 0.9135484148178230 | 0.9422456348214866 | 0.0893126076066103 | T | T | T |
| 0.8907299047993353 | 0.9286368968058085 | 0.2838690692199251 | T | T | T |
| 0.7638047953126054 | 0.9361610920666532 | 0.2342844841234685 | T | T | T |
| 0.6341583119795519 | 0.1693662450566109 | 0.2401012110012854 | T | T | T |
| 0.7035842272947145 | 0.1304643615868703 | 0.0816472164221998 | T | T | T |
| 0.8120577478950817 | 0.1522462702613287 | 0.9716333374576394 | T | T | T |
| 0.9150106379639407 | 0.1605978391100198 | 0.0935248015096039 | T | T | T |
| 0.8963244972858141 | 0.1664931985664767 | 0.2903735227820352 | T | T | T |
| 0.7678971296273738 | 0.1669481104378197 | 0.2441268075449322 | T | T | T |
| 0.6980943091876931 | 0.0536050097288978 | 0.2442170273950814 | T | T | T |
| 0.9146430051148877 | 0.0490570583152626 | 0.2049086445591324 | T | T | T |
| 0.5641524693599692 | 0.8749187787583713 | 0.4166358084619627 | T | T | T |
| 0.5837657441486500 | 0.0053470738285167 | 0.4289034888600571 | T | T | T |
| 0.6052850278540517 | 0.1365833682656604 | 0.4287214384839281 | T | T | T |
| 0.8038093564151488 | 0.8607783563935428 | 0.3894011984211175 | T | T | T |
| 0.8066782040063946 | 0.9956706213612598 | 0.3993358196427682 | T | T | T |
| 0.8060019989695498 | 0.1270099956154730 | 0.4267679988256151 | T | T | T |
| 0.0110174558863117 | 0.9533835621898999 | 0.2182872819182053 | T | T | T |
| 0.0155267899516339 | 0.1345615161281574 | 0.2152522993590367 | T | T | T |
| 0.8624770938883292 | 0.0762325931950204 | 0.7561769723713362 | T | T | T |
| 0.8157617382474178 | 0.0449806059902803 | 0.5807868154846325 | T | T | T |
| 0.7014133574847479 | 0.0528992710092317 | 0.4839680011856149 | T | T | T |
| 0.5946637258341746 | 0.0718670607195426 | 0.5987592157331841 | T | T | T |
| 0.6058509649883413 | 0.0624027432016517 | 0.7951739431770083 | T | T | T |
| 0.7314895437917702 | 0.0645881602410446 | 0.7309250439182040 | T | T | T |
| 0.8609081643643420 | 0.8346554373105884 | 0.7407579560297171 | T | T | T |
| 0.7886387035769390 | 0.8737989696642895 | 0.5830469119738662 | T | T | T |
| 0.6855836661237720 | 0.8415151271165001 | 0.4687256768855545 | T | T | T |
| 0.5892058647038454 | 0.8335994216483813 | 0.6045333210709125 | T | T | T |
| 0.5919004740130577 | 0.8432582611580037 | 0.8032117876540582 | T | T | T |
| 0.7310204124334082 | 0.8478995310886940 | 0.7609342568243603 | T | T | T |
| 0.8089004838348720 | 0.9557081177589563 | 0.7328978349317435 | T | T | T |
| 0.5833898043504517 | 0.9528039012445993 | 0.6873159583423800 | T | T | T |
| 0.9349309827616749 | 0.1335753148657748 | 0.9001178778538252 | T | T | T |
| 0.8849165224403008 | 0.0151698422919757 | 0.9281305050978627 | T | T | T |
| 0.9026294515947003 | 0.8837431701375993 | 0.9167812571218681 | T | T | T |
| 0.6935852866254283 | 0.1395105526093965 | 0.8869505948014430 | T | T | T |
| 0.7035044060619646 | 0.0063786730001706 | 0.9026062522813664 | T | T | T |
| 0.6891417225505077 | 0.8743428588136937 | 0.9587086161644361 | T | T | T |
| 0.4879381943500956 | 0.0454220698929318 | 0.7117617656571622 | T | T | T |
| 0.4804152220214862 | 0.8694430362296537 | 0.7050606292764496 | T | T | T |

**Structure files (CONTCAR) involved in this work:**

|                    |                    |                    |   |   |   |
|--------------------|--------------------|--------------------|---|---|---|
| 0.3528151536747248 | 0.4361136486270197 | 0.7122111875415998 | T | T | T |
| 0.2982550181287071 | 0.4277123233861836 | 0.8911229807616219 | T | T | T |
| 0.1998748734063520 | 0.4451363323527965 | 0.0247563995566095 | T | T | T |
| 0.1022687110623764 | 0.4302290396806724 | 0.8905249242223982 | T | T | T |
| 0.1018109414770420 | 0.4461806862778058 | 0.6930854338700650 | T | T | T |
| 0.2268250679619958 | 0.4700714882111851 | 0.7365212351156040 | T | T | T |
| 0.3561707374007372 | 0.6688796639381478 | 0.7418063356177870 | T | T | T |
| 0.3013400752456402 | 0.6582087703284497 | 0.9178753524471667 | T | T | T |
| 0.1897077843106674 | 0.6445477947204106 | 0.0230897597388269 | T | T | T |
| 0.0904449515646124 | 0.6703776081388664 | 0.8985144808201786 | T | T | T |
| 0.1044955632894153 | 0.6581137003900156 | 0.7022056333133099 | T | T | T |
| 0.2285960332308405 | 0.6354811989444609 | 0.7552906931139532 | T | T | T |
| 0.3219112212926278 | 0.5481003379273663 | 0.8102688925332622 | T | T | T |
| 0.0814689250021209 | 0.5506681448147615 | 0.8159357489964763 | T | T | T |
| 0.4280850882724456 | 0.3719255291198709 | 0.5821348966337943 | T | T | T |
| 0.4167978272878372 | 0.5040894701130012 | 0.5658150705731700 | T | T | T |
| 0.3973790408243967 | 0.6364228035416258 | 0.5588434374908987 | T | T | T |
| 0.1945934883444840 | 0.3692867034841241 | 0.6121160980801572 | T | T | T |
| 0.1808922993158597 | 0.4955915185342009 | 0.5528320415756142 | T | T | T |
| 0.1942048431121903 | 0.6294683433615126 | 0.5617566183248157 | T | T | T |
| 0.9899557053940087 | 0.4539094057495978 | 0.7881287521192284 | T | T | T |
| 0.9859817063071280 | 0.6426986815022676 | 0.7850468573822394 | T | T | T |
| 0.1406390613548192 | 0.5587654526870490 | 0.2133819941855343 | T | T | T |
| 0.1981545522871011 | 0.5669111759254611 | 0.3892959647348190 | T | T | T |
| 0.2981298566955632 | 0.5512095832092437 | 0.5203495005711338 | T | T | T |
| 0.3989053320010504 | 0.5673529997991875 | 0.3920892454545369 | T | T | T |
| 0.3963014389615040 | 0.5496489354954543 | 0.1951697938378240 | T | T | T |
| 0.2690469337832083 | 0.5270711028953756 | 0.2335499772219751 | T | T | T |
| 0.1404430156796924 | 0.3268554894742543 | 0.2390487651110112 | T | T | T |
| 0.1912432441405930 | 0.3378078506789698 | 0.4180370402145991 | T | T | T |
| 0.3067481173485864 | 0.3484591634502873 | 0.5111217535706063 | T | T | T |
| 0.4133100340355499 | 0.3248733983112637 | 0.3976527540264735 | T | T | T |
| 0.3943184461554319 | 0.3388988612334370 | 0.2026522952768996 | T | T | T |
| 0.2690451791058796 | 0.3557464681127685 | 0.2584141230821180 | T | T | T |
| 0.1763120175874121 | 0.4466449548845585 | 0.3063819665195590 | T | T | T |
| 0.4140521019884871 | 0.4461551609270863 | 0.3186035708887744 | T | T | T |
| 0.0651618039369341 | 0.6245143422417017 | 0.0832020028595384 | T | T | T |
| 0.0798540389070566 | 0.4934636659740482 | 0.0626940684400772 | T | T | T |
| 0.0981715932356441 | 0.3618061434319238 | 0.0575575564863853 | T | T | T |
| 0.3064609132001741 | 0.6265254927145322 | 0.1108198532272783 | T | T | T |
| 0.3187282877877319 | 0.4986322142846336 | 0.0542669747976186 | T | T | T |
| 0.3022338284325899 | 0.3649022882415630 | 0.0644388050220280 | T | T | T |
| 0.5098758959021469 | 0.5372249714685350 | 0.2870917346078006 | T | T | T |
| 0.5139458142237420 | 0.3621961927224749 | 0.2798846971028869 | T | T | T |
| 0.4396803654144417 | 0.7479125566058291 | 0.6437977767684906 | T | T | T |
| 0.1997604316799280 | 0.7458634940187202 | 0.6507908800331070 | T | T | T |
| 0.2712721529404034 | 0.7478397116176899 | 0.0575652713557558 | T | T | T |
| 0.1066934648984326 | 0.7476983469801998 | 0.0574577698145943 | T | T | T |
| 0.0597395472947534 | 0.2482408331706256 | 0.1354898319662595 | T | T | T |
| 0.3027556028899741 | 0.2474358277088496 | 0.1524603494228722 | T | T | T |
| 0.2229220050422529 | 0.2473340498858599 | 0.5561739378923242 | T | T | T |
| 0.3885972460659287 | 0.2467432006124940 | 0.5528328234937067 | T | T | T |
| 0.5592006082305131 | 0.2484340747055083 | 0.3551905488131724 | T | T | T |



**Structure files (CONTCAR) involved in this work:**

|                    |                    |                    |   |   |   |
|--------------------|--------------------|--------------------|---|---|---|
| 0.8152312746453426 | 0.2538461268346686 | 0.3768461514529560 | T | T | T |
| 0.7206609684279798 | 0.2488613504594916 | 0.9940993320690932 | T | T | T |
| 0.8987814209307926 | 0.2530233265051584 | 0.9497266638313072 | T | T | T |
| 0.9117932470924165 | 0.7551800517253338 | 0.8858587136438791 | T | T | T |
| 0.6789908130243947 | 0.7407098799229351 | 0.8868749865185326 | T | T | T |
| 0.5862810862642901 | 0.7489385942777594 | 0.4549134876104381 | T | T | T |
| 0.7945631248747936 | 0.6747257768891749 | 0.0870562735846030 | T | T | T |
| 0.7155162516043122 | 0.7730430860747973 | 0.1033163067656266 | T | T | T |
| 0.8456687776962620 | 0.7963191558461461 | 0.0881123713403851 | T | T | T |
| 0.7844347418920514 | 0.7517481331037636 | 0.5001709722633666 | T | T | T |
| 0.9114335330412154 | 0.6733923366615505 | 0.8250425546191558 | T | T | T |
| 0.6708449992813488 | 0.8274124338806602 | 0.8471434140067847 | T | T | T |
| 0.7656193799430113 | 0.6676276789146008 | 0.4802944501303854 | T | T | T |
| 0.7159362308747659 | 0.7030998364650599 | 0.0201198176668942 | T | T | T |
| 0.7666507216083063 | 0.8375075532698307 | 0.0523732285441809 | T | T | T |
| 0.8609641338904461 | 0.7211450697240301 | 0.0077295841799279 | T | T | T |
| 0.9495140296682490 | 0.7784504320047732 | 0.2001355780115003 | T | T | T |
| 0.9251611987178142 | 0.7456735180940763 | 0.2936402615898401 | T | T | T |
| 0.9012036917089551 | 0.7977402887969154 | 0.1526710608440151 | T | T | T |
| 0.9773100421149271 | 0.8254252121711394 | 0.2101180608180713 | T | T | T |
| 0.9754457857279488 | 0.7449957668268216 | 0.1474214206720088 | T | T | T |
| 0.8997705160019357 | 0.7810010453771824 | 0.3438807578510057 | T | T | T |
| 0.9685516351171560 | 0.7248480157882662 | 0.3349965194222179 | T | T | T |
| 0.8920161061038192 | 0.7024435647502097 | 0.2807379604853075 | T | T | T |
| 0.7929571037815425 | 0.6998352787422869 | 0.1508915900437103 | T | T | T |

**Figure 5(b) TS3**

Si O Al Cu C H

1.0000000000000000

20.0219993591000005 0.0000000000000000 0.0000000000000000

0.0000000000000000 19.8990001678000006 0.0000000000000000

0.0000000000000000 0.0000000000000000 13.3830003737999998

93 195 3 3 2 7

Selective dynamics

Direct

|                    |                    |                    |   |   |   |
|--------------------|--------------------|--------------------|---|---|---|
| 0.4219098596007571 | 0.0525723017530670 | 0.6393540218462094 | T | T | T |
| 0.3018048977782843 | 0.0245392309411322 | 0.7845504374972383 | T | T | T |
| 0.2809967259701177 | 0.0631292758233119 | 0.0038540886624327 | T | T | T |
| 0.1216596027205518 | 0.0636759788479344 | 0.0045300613956942 | T | T | T |
| 0.0697983855216141 | 0.0242361810278870 | 0.7950730227599122 | T | T | T |
| 0.1780716659918906 | 0.0493186472829329 | 0.6437220795494046 | T | T | T |
| 0.4244166996902389 | 0.8251478514061431 | 0.6645342533455401 | T | T | T |
| 0.3033150535468599 | 0.8674993159520498 | 0.8021641924014544 | T | T | T |
| 0.2701963898755433 | 0.8261357461978834 | 0.0247433436870318 | T | T | T |
| 0.1159456342192108 | 0.8237860482166169 | 0.0173592392622840 | T | T | T |
| 0.0672743720824196 | 0.8658270690773866 | 0.8044247801683994 | T | T | T |
| 0.1803107050330832 | 0.8263863452921330 | 0.6649117593197886 | T | T | T |
| 0.0759244018049421 | 0.9427500797733374 | 0.1420154761567025 | T | T | T |
| 0.1979883246823822 | 0.9699551746253101 | 0.2847258757973477 | T | T | T |
| 0.2187949554288285 | 0.9312714630033335 | 0.5053936543381342 | T | T | T |
| 0.3780678978127966 | 0.9274057675380658 | 0.5089574148358974 | T | T | T |
| 0.4289374904328091 | 0.9691392169863075 | 0.3014379830423894 | T | T | T |
| 0.3240286075799110 | 0.9466036051525674 | 0.1434422641148934 | T | T | T |
| 0.0776044618185815 | 0.1684909746434307 | 0.1602338161010615 | T | T | T |

**Structure files (CONTCAR) involved in this work:**

|                    |                    |                    |   |   |   |
|--------------------|--------------------|--------------------|---|---|---|
| 0.1956294541164078 | 0.1273878594460514 | 0.3038454147520583 | T | T | T |
| 0.2294346176790060 | 0.1699815526595083 | 0.5220348364933872 | T | T | T |
| 0.3840943318220475 | 0.1717108684783326 | 0.5085919605023357 | T | T | T |
| 0.4331937671040965 | 0.1256400558157792 | 0.3001649697684217 | T | T | T |
| 0.3180125441114230 | 0.1675037375859302 | 0.1664094006299106 | T | T | T |
| 0.5749782371965385 | 0.5552172167034136 | 0.3586120079386400 | T | T | T |
| 0.6939257712014509 | 0.5273131127052371 | 0.2187408475197445 | T | T | T |
| 0.7109318780527338 | 0.5467934860808750 | 0.9895502468624549 | T | T | T |
| 0.8694159066190420 | 0.5670863829215752 | 0.9948242255658831 | T | T | T |
| 0.9292608718367007 | 0.5265471333302711 | 0.2011993095925993 | T | T | T |
| 0.8174087134869356 | 0.5631078538260866 | 0.3417981082675633 | T | T | T |
| 0.5795592453350793 | 0.3246346946331987 | 0.3289320766690025 | T | T | T |
| 0.7035260440983787 | 0.3697656994251445 | 0.2134358673449045 | T | T | T |
| 0.7303752504482606 | 0.3255728503732934 | 0.9919403930928785 | T | T | T |
| 0.8873535887687236 | 0.3281104321223491 | 0.9951421280719857 | T | T | T |
| 0.9336140662391981 | 0.3696502306000082 | 0.2050547644551643 | T | T | T |
| 0.8262007249326021 | 0.3287697277102968 | 0.3534891766925431 | T | T | T |
| 0.9226179783870904 | 0.4472152823116147 | 0.8621776773321020 | T | T | T |
| 0.8018112552750571 | 0.4672290719202196 | 0.7233948306248248 | T | T | T |
| 0.7809166587720417 | 0.4438807400263273 | 0.4964636199983832 | T | T | T |
| 0.6209987897597526 | 0.4288362763090763 | 0.4917425222442169 | T | T | T |
| 0.5633181028230502 | 0.4605911223385857 | 0.7011893962070594 | T | T | T |
| 0.6757708052066314 | 0.4258069369481856 | 0.8412329113498098 | T | T | T |
| 0.7925175843593313 | 0.6220962504590817 | 0.7075863460097518 | T | T | T |
| 0.6076858830506127 | 0.6722378498825956 | 0.4882158733129276 | T | T | T |
| 0.5621515266877110 | 0.6184670162874589 | 0.7004759491590419 | T | T | T |
| 0.6683622281950620 | 0.6658891179360249 | 0.8414575680276922 | T | T | T |
| 0.5757470547451570 | 0.9418701115781385 | 0.3574566353319974 | T | T | T |
| 0.6948664879775140 | 0.9712157581787418 | 0.2158005098124479 | T | T | T |
| 0.7171095675671133 | 0.9496077364277220 | 0.9897367677518921 | T | T | T |
| 0.8740807165236935 | 0.9492948691576182 | 0.9839698386463090 | T | T | T |
| 0.9300423188329915 | 0.9668182401801579 | 0.1960545677371634 | T | T | T |
| 0.8178544855113052 | 0.9301533860736854 | 0.3359312519017228 | T | T | T |
| 0.5797599989493131 | 0.1701017480927170 | 0.3224888802313867 | T | T | T |
| 0.7038914179129225 | 0.1276670458265073 | 0.2086120783417202 | T | T | T |
| 0.7358252248542122 | 0.1669526709146975 | 0.9870675315659813 | T | T | T |
| 0.8930685977224481 | 0.1780429206884831 | 0.9757102079847969 | T | T | T |
| 0.9327687181989289 | 0.1247267792520070 | 0.1940814301082255 | T | T | T |
| 0.8251880532703739 | 0.1738458916635958 | 0.3456393603189116 | T | T | T |
| 0.9260570563465396 | 0.0632340481193457 | 0.8462438723174815 | T | T | T |
| 0.8032472408553216 | 0.0284198293794329 | 0.7116729536267491 | T | T | T |
| 0.7850417844317358 | 0.0538841802694455 | 0.4837897892908442 | T | T | T |
| 0.6246408194436163 | 0.0681188138701106 | 0.4853836304718896 | T | T | T |
| 0.5671143453248757 | 0.0351254468458113 | 0.6946340619601334 | T | T | T |
| 0.6783677920917532 | 0.0639753919988577 | 0.8359621002230443 | T | T | T |
| 0.9133506310508248 | 0.8324749373289840 | 0.8319050471283319 | T | T | T |
| 0.7973756746427639 | 0.8713465995434385 | 0.7044164333321157 | T | T | T |
| 0.7683559968444231 | 0.8275496706944842 | 0.4888222091834689 | T | T | T |
| 0.6107690553374513 | 0.8239486069654754 | 0.4933619252817583 | T | T | T |
| 0.5686456818004266 | 0.8767191469351818 | 0.7067802981875428 | T | T | T |
| 0.4190333870975754 | 0.4421579171473747 | 0.6466683949936839 | T | T | T |
| 0.2986695958949135 | 0.4710235554408165 | 0.7888176720211346 | T | T | T |
| 0.2795665981448379 | 0.4336448154092221 | 0.0106814180732639 | T | T | T |

**Structure files (CONTCAR) involved in this work:**

|                    |                    |                    |   |   |   |
|--------------------|--------------------|--------------------|---|---|---|
| 0.1210659354695236 | 0.4313819846819670 | 0.0102841312095993 | T | T | T |
| 0.0691491444379218 | 0.4707728843651060 | 0.8011924779387811 | T | T | T |
| 0.1750410857866722 | 0.4452481041067506 | 0.6484129800765542 | T | T | T |
| 0.4194624128410292 | 0.6696280042968639 | 0.6652232612492397 | T | T | T |
| 0.3017272841098219 | 0.6278700642790722 | 0.8058106535756783 | T | T | T |
| 0.2698804181060958 | 0.6698234955815247 | 0.0289803747622415 | T | T | T |
| 0.1161628967880659 | 0.6710827893364650 | 0.0171132148290654 | T | T | T |
| 0.0658378191213837 | 0.6301040592355666 | 0.8043158247185287 | T | T | T |
| 0.1801173250019067 | 0.6679813825458876 | 0.6662561368988358 | T | T | T |
| 0.0742295674941486 | 0.5531294304131049 | 0.1429153876678647 | T | T | T |
| 0.1958914325839415 | 0.5245658836856545 | 0.2850074563061604 | T | T | T |
| 0.2159688835644258 | 0.5612467134777089 | 0.5067597628569452 | T | T | T |
| 0.3753594987355761 | 0.5650273732869286 | 0.5110603259821017 | T | T | T |
| 0.4299015976736655 | 0.5248971018489321 | 0.3030561994961434 | T | T | T |
| 0.3233268610372913 | 0.5506483467984146 | 0.1486340705802489 | T | T | T |
| 0.0781423959377714 | 0.3235792315101064 | 0.1624751012309824 | T | T | T |
| 0.1954468232609353 | 0.3664900161063606 | 0.3044594832141675 | T | T | T |
| 0.2293986706476895 | 0.3265362079196353 | 0.5241730237575095 | T | T | T |
| 0.3844645976295512 | 0.3239686978752608 | 0.5124292500979046 | T | T | T |
| 0.4344605752786547 | 0.3684825314366904 | 0.3022197906239288 | T | T | T |
| 0.3186632415314535 | 0.3267745336283946 | 0.1694814847192132 | T | T | T |
| 0.3562787036711229 | 0.0571603160590338 | 0.7098195861913813 | T | T | T |
| 0.2996106541015306 | 0.0691735659816732 | 0.8862651729092115 | T | T | T |
| 0.2010810889288061 | 0.0510093905513925 | 0.0187294067871666 | T | T | T |
| 0.1016662006517708 | 0.0669284247957380 | 0.8872788345240414 | T | T | T |
| 0.1031282610501700 | 0.0462137217738331 | 0.6897217765881906 | T | T | T |
| 0.2289279977071915 | 0.0259833731100988 | 0.7315980006546181 | T | T | T |
| 0.3618751538769563 | 0.8295081755511029 | 0.7417013935876011 | T | T | T |
| 0.2991180016291604 | 0.8346533610801786 | 0.9126385450472392 | T | T | T |
| 0.1922658784918673 | 0.8503436503047963 | 0.0293832472198700 | T | T | T |
| 0.0958040168131006 | 0.8252556313020439 | 0.9004636156644900 | T | T | T |
| 0.1039846269468136 | 0.8377523922773823 | 0.7043610076814416 | T | T | T |
| 0.2315094698299469 | 0.8580188932014777 | 0.7468116911923413 | T | T | T |
| 0.3205362901483493 | 0.9471236408864895 | 0.8109976189893725 | T | T | T |
| 0.0827757904727155 | 0.9452767135351179 | 0.8186756555321909 | T | T | T |
| 0.4293707132888468 | 0.1216111837793143 | 0.5755042630236290 | T | T | T |
| 0.4172307149399935 | 0.9894121478748108 | 0.5623532971580283 | T | T | T |
| 0.4021797576969441 | 0.8566851376882034 | 0.5570486186549444 | T | T | T |
| 0.1928271032895923 | 0.1256025441185081 | 0.6075450126688370 | T | T | T |
| 0.1827433868690052 | 0.9984963330126070 | 0.5488663366974107 | T | T | T |
| 0.1892923566770968 | 0.8638502214501139 | 0.5577977578627108 | T | T | T |
| 0.9905894601684659 | 0.0394502832672541 | 0.7830143096171849 | T | T | T |
| 0.9877429455968366 | 0.8540107197471676 | 0.7964196539098882 | T | T | T |
| 0.1397599111092768 | 0.9377613775893440 | 0.2153809264743352 | T | T | T |
| 0.2029765919235493 | 0.9260956379422518 | 0.3866743630867889 | T | T | T |
| 0.2983357421710417 | 0.9374624991412310 | 0.5271201232646721 | T | T | T |
| 0.3939702802327471 | 0.9256244063603084 | 0.3901349353598949 | T | T | T |
| 0.3974208551009907 | 0.9489820621318061 | 0.1938811821768154 | T | T | T |
| 0.2687786510196355 | 0.9674009636328629 | 0.2267899778156628 | T | T | T |
| 0.1389043686449515 | 0.1648962622727499 | 0.2384366505895403 | T | T | T |
| 0.1929994631837089 | 0.1596482426502031 | 0.4147424677871307 | T | T | T |
| 0.3068378450703160 | 0.1459564513223944 | 0.5119700390589467 | T | T | T |
| 0.4101375834719992 | 0.1721599772608348 | 0.3937649085774528 | T | T | T |

**Structure files (CONTCAR) involved in this work:**

|                    |                    |                    |   |   |   |
|--------------------|--------------------|--------------------|---|---|---|
| 0.3946503618629750 | 0.1513168417590785 | 0.1997886403399956 | T | T | T |
| 0.2686872739943219 | 0.1385704705881309 | 0.2534930773333474 | T | T | T |
| 0.1793881547116589 | 0.0475003753529924 | 0.3099880842614989 | T | T | T |
| 0.4142436831709557 | 0.0480802336262783 | 0.3248694300742712 | T | T | T |
| 0.0665799877720632 | 0.8713087772499455 | 0.0835720496197819 | T | T | T |
| 0.0823447670139260 | 0.0023664649593115 | 0.0597800691811530 | T | T | T |
| 0.0991545870905480 | 0.1344116786784380 | 0.0546150548217971 | T | T | T |
| 0.3122893876048390 | 0.8707476014620307 | 0.1034197852556400 | T | T | T |
| 0.3206646139004254 | 0.9991476523032138 | 0.0505816269718509 | T | T | T |
| 0.3024734769012694 | 0.1322766398599432 | 0.0593803214568222 | T | T | T |
| 0.5081334588071523 | 0.9542299758338025 | 0.2935365721617367 | T | T | T |
| 0.5132530536650729 | 0.1315176862211468 | 0.2828259802158622 | T | T | T |
| 0.6371556025981630 | 0.5664160399265001 | 0.2816569878082008 | T | T | T |
| 0.6797017593998831 | 0.5408762382169617 | 0.1004859445337812 | T | T | T |
| 0.7915052367441003 | 0.5449226816244419 | 0.9926232379778900 | T | T | T |
| 0.8976088731639237 | 0.5690487468109183 | 0.1085495022040099 | T | T | T |
| 0.8942905826792988 | 0.5507040757643664 | 0.3039723035599743 | T | T | T |
| 0.7682891617533869 | 0.5558575251487730 | 0.2435249179067842 | T | T | T |
| 0.6394868028534666 | 0.3259383087011158 | 0.2473068649483545 | T | T | T |
| 0.7095899041757485 | 0.3647058741969242 | 0.0933700574662889 | T | T | T |
| 0.8088838186960262 | 0.3415258640856922 | 0.9722472527769812 | T | T | T |
| 0.9017337900000810 | 0.3253882631852165 | 0.1147780703735110 | T | T | T |
| 0.9002676538255084 | 0.3467269257465307 | 0.3099729739197789 | T | T | T |
| 0.7713683299535103 | 0.3423279145129255 | 0.2655508439618453 | T | T | T |
| 0.6909864896297488 | 0.4476618262527143 | 0.2451038683275385 | T | T | T |
| 0.9161423076071461 | 0.4476668193767041 | 0.1803883313251862 | T | T | T |
| 0.5593172026800730 | 0.6225831643040222 | 0.4220771866603220 | T | T | T |
| 0.5906328467710963 | 0.4931949707512808 | 0.4336452979822077 | T | T | T |
| 0.6045224373100990 | 0.3599006130350941 | 0.4315653689666767 | T | T | T |
| 0.8132866365070806 | 0.6387484684347162 | 0.3832477189313044 | T | T | T |
| 0.7981694223950163 | 0.5061200715328158 | 0.4229847067927507 | T | T | T |
| 0.8113165701571516 | 0.3745076148386862 | 0.4506540316882438 | T | T | T |
| 0.0082057385972959 | 0.5437825946591390 | 0.2121202964569230 | T | T | T |
| 0.0140224960603665 | 0.3607472353794511 | 0.2129618782904281 | T | T | T |
| 0.8606538804314101 | 0.4309129704888551 | 0.7882492572594066 | T | T | T |
| 0.8148069764203067 | 0.4549339548731778 | 0.6052903634326121 | T | T | T |
| 0.7006953291857245 | 0.4372322930627644 | 0.5062620532442699 | T | T | T |
| 0.5856876304078980 | 0.4219773695343513 | 0.5999831940373235 | T | T | T |
| 0.6008398820803025 | 0.4262985562679757 | 0.7960869943674644 | T | T | T |
| 0.7303712682029250 | 0.4328140690820679 | 0.7522563592974995 | T | T | T |
| 0.8514311854189608 | 0.6693324631729829 | 0.7472603368684489 | T | T | T |
| 0.7868766740434221 | 0.6177878276690368 | 0.5894682449317651 | T | T | T |
| 0.6835822685217958 | 0.6577848417933619 | 0.4610786098700946 | T | T | T |
| 0.5914735701789954 | 0.6596161871114785 | 0.6068370840154835 | T | T | T |
| 0.5933291658388676 | 0.6488826840728207 | 0.8045448987071353 | T | T | T |
| 0.7213417695221193 | 0.6489628205224721 | 0.7565594010589715 | T | T | T |
| 0.8018512750833788 | 0.5458175287024257 | 0.7543699514802396 | T | T | T |
| 0.5831587203697938 | 0.5396583949222115 | 0.6928299716291854 | T | T | T |
| 0.9315269614973536 | 0.3864966892965692 | 0.9428273831899286 | T | T | T |
| 0.9122505434219687 | 0.5167002878066467 | 0.9251923306309845 | T | T | T |
| 0.8815325591577006 | 0.6434546958686301 | 0.9524864022655154 | T | T | T |
| 0.6863575367419803 | 0.3554897789282979 | 0.9006180833794791 | T | T | T |
| 0.6822793251853224 | 0.4892360569001267 | 0.9179602739088509 | T | T | T |

**Structure files (CONTCAR) involved in this work:**

|                    |                    |                    |   |   |   |
|--------------------|--------------------|--------------------|---|---|---|
| 0.6832112596956571 | 0.6208375216738309 | 0.9474714680078281 | T | T | T |
| 0.4834821787429086 | 0.4519181796050291 | 0.7187575293968754 | T | T | T |
| 0.4814405629273702 | 0.6254135040458846 | 0.7083903058073806 | T | T | T |
| 0.6370413016976364 | 0.9333445221745442 | 0.2783988178596461 | T | T | T |
| 0.6811946501950300 | 0.9634777643907658 | 0.0967563480285340 | T | T | T |
| 0.7962348816596305 | 0.9686477963323741 | 0.9986645897264987 | T | T | T |
| 0.9052156772106441 | 0.9284616417976526 | 0.0934149249388611 | T | T | T |
| 0.8936630907056119 | 0.9313104582242290 | 0.2904491598826517 | T | T | T |
| 0.7667783120459205 | 0.9359377148754522 | 0.2402977840597897 | T | T | T |
| 0.6345709350610380 | 0.1669156586779980 | 0.2322256411517696 | T | T | T |
| 0.7196135094340727 | 0.1270708270290590 | 0.0900418291733806 | T | T | T |
| 0.8145138531759262 | 0.1599494415749299 | 0.9588113064377499 | T | T | T |
| 0.9113283267077290 | 0.1617591268865686 | 0.0912728677826588 | T | T | T |
| 0.8960348631875189 | 0.1592245319413749 | 0.2892329548929298 | T | T | T |
| 0.7649413556568280 | 0.1648004911822031 | 0.2654429207881554 | T | T | T |
| 0.6974962950139828 | 0.0502518505800419 | 0.2473438629032831 | T | T | T |
| 0.9108189160679715 | 0.0457802628100473 | 0.1881503972864323 | T | T | T |
| 0.5662427447371513 | 0.8758702427081749 | 0.4264602906447771 | T | T | T |
| 0.5887710948296082 | 0.0058424776373741 | 0.4295458338028454 | T | T | T |
| 0.6101119927349830 | 0.1366981777046229 | 0.4234023718410652 | T | T | T |
| 0.8085721677406290 | 0.8590377138944862 | 0.3918483711508673 | T | T | T |
| 0.8074001708865398 | 0.9935286896639837 | 0.4096549758677091 | T | T | T |
| 0.8151693811696099 | 0.1239874594077779 | 0.4402520962249087 | T | T | T |
| 0.0095468992907077 | 0.9549355562863846 | 0.2095648338882646 | T | T | T |
| 0.0133015499838233 | 0.1299373337668303 | 0.2083676948099502 | T | T | T |
| 0.8618280177985268 | 0.0666113833708020 | 0.7737835756138510 | T | T | T |
| 0.8164303753499558 | 0.0413517357941916 | 0.5938201691791981 | T | T | T |
| 0.7045361724050540 | 0.0562916706059220 | 0.4919252740332232 | T | T | T |
| 0.5931514802561951 | 0.0755829137264387 | 0.5962429910429686 | T | T | T |
| 0.6031026689678854 | 0.0677899626528703 | 0.7923625913055697 | T | T | T |
| 0.7312000088488922 | 0.0598782365285013 | 0.7435685272230502 | T | T | T |
| 0.8679305930503777 | 0.8335660681465803 | 0.7320948082468600 | T | T | T |
| 0.7883456109983789 | 0.8746467106396351 | 0.5841001286663626 | T | T | T |
| 0.6887575142733440 | 0.8372806075062184 | 0.4658962951718647 | T | T | T |
| 0.5987862666570681 | 0.8345127762649683 | 0.6123733262415659 | T | T | T |
| 0.6010859441033737 | 0.8537300163053514 | 0.8110544382573927 | T | T | T |
| 0.7372360158342830 | 0.8348104672526987 | 0.7604007570718517 | T | T | T |
| 0.8054233428687391 | 0.9497049195661660 | 0.7420511237135858 | T | T | T |
| 0.5846411023514353 | 0.9560371605488711 | 0.6837053601352387 | T | T | T |
| 0.9388041171370451 | 0.1361498846241930 | 0.8971922352234293 | T | T | T |
| 0.9153036811607987 | 0.0121272459833991 | 0.9404434726715645 | T | T | T |
| 0.8829025837137913 | 0.8834570901156839 | 0.9155558392446009 | T | T | T |
| 0.6919203903142206 | 0.1321323079759283 | 0.8997433582341792 | T | T | T |
| 0.6836669366892776 | 0.9961885856444643 | 0.9046900751000342 | T | T | T |
| 0.7095298417027994 | 0.8689665315819441 | 0.9641652335900819 | T | T | T |
| 0.4872519403191584 | 0.0453125097380324 | 0.7096524608962231 | T | T | T |
| 0.4873907717631477 | 0.8659019912436001 | 0.7101942918423825 | T | T | T |
| 0.3528072776215967 | 0.4360411654206348 | 0.7156379130362120 | T | T | T |
| 0.2950569721215249 | 0.4282233866386734 | 0.8921191305637898 | T | T | T |
| 0.1999559189737002 | 0.4442796783579827 | 0.0311502550369721 | T | T | T |
| 0.1052693946915873 | 0.4296584086538925 | 0.8918469364486431 | T | T | T |
| 0.1002256578654859 | 0.4458463975503144 | 0.6952525095763079 | T | T | T |
| 0.2259942887235029 | 0.4702548003938740 | 0.7353791602561206 | T | T | T |

**Structure files (CONTCAR) involved in this work:**

|                    |                    |                    |   |   |   |
|--------------------|--------------------|--------------------|---|---|---|
| 0.3593158190287755 | 0.6683202945550275 | 0.7463426405753909 | T | T | T |
| 0.2986338588069405 | 0.6585932341745809 | 0.9174422537627931 | T | T | T |
| 0.1922438179995618 | 0.6451834390845225 | 0.0347953033572783 | T | T | T |
| 0.0991235858690965 | 0.6693637510697790 | 0.8995674056439906 | T | T | T |
| 0.1037050210113423 | 0.6565763188662505 | 0.7033045685120065 | T | T | T |
| 0.2300712738615415 | 0.6373756419348831 | 0.7507807974625933 | T | T | T |
| 0.3200748924007737 | 0.5483344395306656 | 0.8113006456817240 | T | T | T |
| 0.0816945353818156 | 0.5502584741357180 | 0.8192506354478319 | T | T | T |
| 0.4282138241642763 | 0.3729078094901354 | 0.5836140958441415 | T | T | T |
| 0.4148150704548506 | 0.5050790578937867 | 0.5689919592845666 | T | T | T |
| 0.3934547036900384 | 0.6373994070880946 | 0.5602612822094518 | T | T | T |
| 0.1930849290736495 | 0.3697704771452371 | 0.6112782782092013 | T | T | T |
| 0.1777154458719983 | 0.4964558992220901 | 0.5538035746263784 | T | T | T |
| 0.1918909217763709 | 0.6304722938586489 | 0.5597283521173486 | T | T | T |
| 0.9900134989478090 | 0.4538169131315092 | 0.7967344795202361 | T | T | T |
| 0.9879134309857430 | 0.6453620487807118 | 0.7981249107167501 | T | T | T |
| 0.1391865820456169 | 0.5579112291064412 | 0.2141025855514035 | T | T | T |
| 0.1968736049300138 | 0.5661616715440332 | 0.3891760321929639 | T | T | T |
| 0.2957788020606358 | 0.5505746567869048 | 0.5217750423197905 | T | T | T |
| 0.3972158770531542 | 0.5675369941458535 | 0.3944998955506789 | T | T | T |
| 0.3971400582876464 | 0.5475872793723459 | 0.1975127126632282 | T | T | T |
| 0.2686380016886013 | 0.5299396014774562 | 0.2329197337379584 | T | T | T |
| 0.1402188106118095 | 0.3258769362302720 | 0.2398312384473050 | T | T | T |
| 0.1922421847516202 | 0.3383863331371945 | 0.4177960124411786 | T | T | T |
| 0.3070937144108247 | 0.3497194587299039 | 0.5134519944806789 | T | T | T |
| 0.4131848587632272 | 0.3245370199159462 | 0.3991927980814210 | T | T | T |
| 0.3954975360286001 | 0.3404163787833011 | 0.2038121408410224 | T | T | T |
| 0.2694707790765902 | 0.3545459595118134 | 0.2575541623800678 | T | T | T |
| 0.1775792174622917 | 0.4461104822782729 | 0.3039207172289235 | T | T | T |
| 0.4139837580943760 | 0.4459639389319525 | 0.3237097716012433 | T | T | T |
| 0.0655720850188351 | 0.6238564532593985 | 0.0821626011987086 | T | T | T |
| 0.0789751968736110 | 0.4917609159476068 | 0.0633658102689186 | T | T | T |
| 0.0983344968562909 | 0.3598613259173878 | 0.0579019128348353 | T | T | T |
| 0.3120879202260839 | 0.6269263420983263 | 0.1097795619618696 | T | T | T |
| 0.3191128514584692 | 0.4983710043597600 | 0.0553754144852381 | T | T | T |
| 0.3039184677508704 | 0.3646614734469302 | 0.0642043503204798 | T | T | T |
| 0.5093811136845232 | 0.5374061826425751 | 0.2923921432928000 | T | T | T |
| 0.5144417145278196 | 0.3627531137370203 | 0.2830639534907197 | T | T | T |
| 0.4426280485217100 | 0.7465585473742695 | 0.6465158815093364 | T | T | T |
| 0.1951709565105784 | 0.7472308234215708 | 0.6490145694784374 | T | T | T |
| 0.2758662996213106 | 0.7483784354639623 | 0.0591191143769681 | T | T | T |
| 0.1069573118221645 | 0.7475253128720852 | 0.0589244486037270 | T | T | T |
| 0.0589680209302666 | 0.2462448576450205 | 0.1379168755971812 | T | T | T |
| 0.3061503295233832 | 0.2473164309216275 | 0.1521707170490715 | T | T | T |
| 0.2244175574906660 | 0.2480304919785239 | 0.5556496273856935 | T | T | T |
| 0.3895609181812700 | 0.2473375680412889 | 0.5537214222171061 | T | T | T |
| 0.5608114222126228 | 0.2469152506085046 | 0.3504379384386885 | T | T | T |
| 0.8245939742109430 | 0.2504174236120819 | 0.3871825283432639 | T | T | T |
| 0.7159579040749118 | 0.2455814875867835 | 0.0005583835442199 | T | T | T |
| 0.9086736949091305 | 0.2558657519132809 | 0.9498219557709767 | T | T | T |
| 0.9136922859476551 | 0.7593505128372872 | 0.8879501724852021 | T | T | T |
| 0.6735867027158898 | 0.7403512314047975 | 0.8911756104318328 | T | T | T |
| 0.5859960801442464 | 0.7492915296538207 | 0.4628501476611250 | T | T | T |

**Structure files (CONTCAR) involved in this work:**

|                    |                    |                    |   |   |   |
|--------------------|--------------------|--------------------|---|---|---|
| 0.7757335694768918 | 0.6868035833580836 | 0.0811147113043255 | T | T | T |
| 0.6714111388233297 | 0.7673872489717420 | 0.1228087677164787 | T | T | T |
| 0.8404730676983579 | 0.8027347203980139 | 0.1018869364451026 | T | T | T |
| 0.7902685763611226 | 0.7515736586094995 | 0.5044083346552631 | T | T | T |
| 0.9124185867158431 | 0.6767690381602466 | 0.8347641298875326 | T | T | T |
| 0.6781081377276718 | 0.8264098220771887 | 0.8527555039101353 | T | T | T |
| 0.7675123719591823 | 0.6682547904754682 | 0.4881548559133445 | T | T | T |
| 0.6835776896820955 | 0.6985037099554737 | 0.0420811193825123 | T | T | T |
| 0.7452017955545124 | 0.8130535985819990 | 0.0850175338180882 | T | T | T |
| 0.8588421242232509 | 0.7266695824260128 | 0.0200620812486471 | T | T | T |
| 0.9377360442544017 | 0.7345366452926489 | 0.2006812210817070 | T | T | T |
| 0.9124874119820322 | 0.7304918737404981 | 0.2992134426220858 | T | T | T |
| 0.9531811473655121 | 0.7821336378591884 | 0.1675137965902894 | T | T | T |
| 0.8694085240891410 | 0.8422846189286310 | 0.0914219105500195 | T | T | T |
| 0.9513246972886350 | 0.6889581154049401 | 0.1596056903271925 | T | T | T |
| 0.9023511444437688 | 0.7779208996034114 | 0.3377008292839777 | T | T | T |
| 0.9498715158035586 | 0.6986768992815741 | 0.3398961554162184 | T | T | T |
| 0.8705266556532174 | 0.6924915488597294 | 0.3142822939573008 | T | T | T |
| 0.7783696492089285 | 0.6818227859658779 | 0.1540344410045577 | T | T | T |

**Figure 5(c) TS-CH<sub>4</sub> as same as Figure 1(b) Ga/ZSM-5****Figure 5(c) TS-CH<sub>3</sub>OH same as Figure2(a) Ga-TS****Figure 5(c) TS1**

Si Al O Ga H C

1.0000000000000000

20.0219999999999985 0.0000000000000000 0.0000000000000000

0.0000000000000000 19.8990000000000009 0.0000000000000000

0.0000000000000000 0.0000000000000000 13.3829999999999991

93 3 192 1 6 2

Selective dynamics

Direct

|                    |                    |                    |   |   |   |
|--------------------|--------------------|--------------------|---|---|---|
| 0.4214354408638648 | 0.0565477769545967 | 0.6487180393426656 | T | T | T |
| 0.2999534546199871 | 0.0254659925053081 | 0.7879987787539283 | T | T | T |
| 0.2800706611375364 | 0.0589885396873288 | 0.0120883262750220 | T | T | T |
| 0.1206097351425601 | 0.0618694484186523 | 0.0129915298191001 | T | T | T |
| 0.0670029671651872 | 0.0282902491003598 | 0.8008868117536733 | T | T | T |
| 0.1749153239277794 | 0.0549056993835386 | 0.6504838380980921 | T | T | T |
| 0.4185122756715947 | 0.8270681147352645 | 0.6680620688685022 | T | T | T |
| 0.3012614006808752 | 0.8671484425669055 | 0.8082173826143058 | T | T | T |
| 0.2674141366441676 | 0.8268156215676584 | 0.0292474981309162 | T | T | T |
| 0.1123674306270938 | 0.8246510517940389 | 0.0186890066982551 | T | T | T |
| 0.0607447436185811 | 0.8687328005883380 | 0.8045978847520451 | T | T | T |
| 0.1778096837439027 | 0.8275138074199674 | 0.6728487246527931 | T | T | T |
| 0.0746680075380880 | 0.9414911757105866 | 0.1499402998030870 | T | T | T |
| 0.1960993599480804 | 0.9717351758816560 | 0.2920746863441500 | T | T | T |
| 0.2154022988366774 | 0.9370610002382046 | 0.5137421794220602 | T | T | T |
| 0.3746768757484102 | 0.9342899534513930 | 0.5153870832382699 | T | T | T |
| 0.4290429980315518 | 0.9698974513370748 | 0.3047209492926184 | T | T | T |
| 0.3209753130820979 | 0.9433761976323695 | 0.1538732813988277 | T | T | T |
| 0.0783263901393042 | 0.1714233125866304 | 0.1649982564128503 | T | T | T |
| 0.1960817498778379 | 0.1292112211939325 | 0.3071655309450088 | T | T | T |
| 0.2308398162548254 | 0.1718563663422464 | 0.5256469783124798 | T | T | T |
| 0.3854158340489384 | 0.1734564974546365 | 0.5144184081553409 | T | T | T |
| 0.4358392786647611 | 0.1282838603405502 | 0.3032054109994528 | T | T | T |

**Structure files (CONTCAR) involved in this work:**

|                    |                    |                    |   |   |   |
|--------------------|--------------------|--------------------|---|---|---|
| 0.3188805412130828 | 0.1667354717076984 | 0.1702126733163215 | T | T | T |
| 0.5762345882596139 | 0.5564425384404071 | 0.3528164358082350 | T | T | T |
| 0.6881050904347378 | 0.5374344475946169 | 0.1939263210458157 | T | T | T |
| 0.7115620880108919 | 0.5625848915440393 | 0.9761298003412869 | T | T | T |
| 0.8695752355650519 | 0.5555253503695844 | 0.9710724846173390 | T | T | T |
| 0.9327538474698291 | 0.5268514640342714 | 0.1840734779817381 | T | T | T |
| 0.5751867540627298 | 0.3306675387351948 | 0.3373222210349874 | T | T | T |
| 0.7073590813037227 | 0.3778712777492854 | 0.2268108677024829 | T | T | T |
| 0.7348412380785877 | 0.3317753624672752 | 0.0032952772850819 | T | T | T |
| 0.8873305129107029 | 0.3262830286229129 | 0.9774448070784003 | T | T | T |
| 0.9398678063353326 | 0.3701881002944640 | 0.1936346023881920 | T | T | T |
| 0.9226161342179857 | 0.4357978057081538 | 0.8276134294393096 | T | T | T |
| 0.7775384879801023 | 0.4445265877725749 | 0.4690339318735117 | T | T | T |
| 0.6219307584619086 | 0.4323748178942667 | 0.4907553002365699 | T | T | T |
| 0.5699104767864694 | 0.4667072424102108 | 0.7080613763266751 | T | T | T |
| 0.6753499514363293 | 0.4330250002594892 | 0.8531971202034933 | T | T | T |
| 0.9170459330903146 | 0.6697777491751314 | 0.8258129903341902 | T | T | T |
| 0.7943545927201231 | 0.6326234697397313 | 0.7053489428604971 | T | T | T |
| 0.7683612741959374 | 0.6688032944037491 | 0.4815426840802539 | T | T | T |
| 0.6135484320566045 | 0.6709166615901514 | 0.4837600155880175 | T | T | T |
| 0.5692974064752216 | 0.6256995124414634 | 0.7043998361384303 | T | T | T |
| 0.6785739755487737 | 0.6833302785739802 | 0.8377076820969109 | T | T | T |
| 0.5738133239323892 | 0.9446860246996543 | 0.3671801598707800 | T | T | T |
| 0.6960190393685242 | 0.9747226593492689 | 0.2284316897023355 | T | T | T |
| 0.7153833496328407 | 0.9464423314451040 | 0.0015872974089773 | T | T | T |
| 0.8758825924622003 | 0.9323090842107019 | 0.9975686788236683 | T | T | T |
| 0.9298236328872088 | 0.9697425314471182 | 0.2084479020374185 | T | T | T |
| 0.8214150274090662 | 0.9371897494876653 | 0.3584427182783314 | T | T | T |
| 0.5797956625684129 | 0.1758758480834875 | 0.3379497105796443 | T | T | T |
| 0.7001809466962347 | 0.1343977499691370 | 0.2089926356398411 | T | T | T |
| 0.7303060631724519 | 0.1731386937966491 | 0.9858082405858369 | T | T | T |
| 0.8848338348439546 | 0.1724958924044835 | 0.9960558683700690 | T | T | T |
| 0.9330500802157612 | 0.1284612640156992 | 0.2078915836246656 | T | T | T |
| 0.8222960758402827 | 0.1720479836148409 | 0.3490810721033478 | T | T | T |
| 0.9229720956153491 | 0.0564042752073466 | 0.8652382939738328 | T | T | T |
| 0.8031085734475775 | 0.0311620772695785 | 0.7262050433711780 | T | T | T |
| 0.7805239722947392 | 0.0558018886762524 | 0.4994657722445137 | T | T | T |
| 0.6204421822992993 | 0.0683712339367348 | 0.4969760641864336 | T | T | T |
| 0.5664500916233478 | 0.0337739695446005 | 0.7056455494428896 | T | T | T |
| 0.6760989193502092 | 0.0634946733057594 | 0.8554592682417668 | T | T | T |
| 0.9155414413755480 | 0.8235186756767311 | 0.8426799587023333 | T | T | T |
| 0.7979080002094741 | 0.8740769310213479 | 0.7131759906848310 | T | T | T |
| 0.7675093453548122 | 0.8294852149027112 | 0.4930546418981178 | T | T | T |
| 0.6114162433067319 | 0.8261635665899636 | 0.4980799210880199 | T | T | T |
| 0.5613425220612598 | 0.8766720196955321 | 0.7053451871195061 | T | T | T |
| 0.6721382409694228 | 0.8382759229401744 | 0.8471081179442930 | T | T | T |
| 0.4253058511549572 | 0.4453778321831048 | 0.6369684509154828 | T | T | T |
| 0.3042474614987555 | 0.4720252308162624 | 0.7831022843726546 | T | T | T |
| 0.2864370231197439 | 0.4307758922865039 | 0.0006225007181222 | T | T | T |
| 0.1276382894692242 | 0.4299555837311065 | 0.0010060724829898 | T | T | T |
| 0.0734481140424326 | 0.4717400099929495 | 0.7951528512638486 | T | T | T |
| 0.1804046520872326 | 0.4483172014218786 | 0.6415463981571677 | T | T | T |
| 0.4250122523019021 | 0.6720052674497885 | 0.6581008503003140 | T | T | T |



**Structure files (CONTCAR) involved in this work:**

|                    |                    |                    |   |   |   |
|--------------------|--------------------|--------------------|---|---|---|
| 0.3028630141211268 | 0.6290878398112404 | 0.7963567968797838 | T | T | T |
| 0.2700741497786302 | 0.6707424008989911 | 0.0153346757147117 | T | T | T |
| 0.1155868401213081 | 0.6714256822841504 | 0.0088441588521610 | T | T | T |
| 0.0657426486815368 | 0.6290827803001682 | 0.7986294459653334 | T | T | T |
| 0.1795811814726471 | 0.6691892282243510 | 0.6601992273666190 | T | T | T |
| 0.0790034456035669 | 0.5509841334800949 | 0.1367438596998019 | T | T | T |
| 0.2014529183059860 | 0.5257041241954401 | 0.2797747197713498 | T | T | T |
| 0.2217206242264725 | 0.5664691312151060 | 0.5022896157464051 | T | T | T |
| 0.3799205466775719 | 0.5685593882777152 | 0.5052206397417844 | T | T | T |
| 0.4266758252079097 | 0.5240230197641340 | 0.2975688299808698 | T | T | T |
| 0.3270795420012435 | 0.5498723495685259 | 0.1370648408776041 | T | T | T |
| 0.0832923267956231 | 0.3263163695748812 | 0.1551441856662417 | T | T | T |
| 0.1999072781349843 | 0.3681031854782092 | 0.2996187804911589 | T | T | T |
| 0.2321767486882661 | 0.3279806035111293 | 0.5200096259703624 | T | T | T |
| 0.3863027302144413 | 0.3262618238658168 | 0.5083887300345399 | T | T | T |
| 0.4322335368852913 | 0.3677205395892305 | 0.2940439394638455 | T | T | T |
| 0.3194262114042140 | 0.3244992076870203 | 0.1617997478679682 | T | T | T |
| 0.8142237025632709 | 0.5711425082940882 | 0.3162948208441899 | T | T | T |
| 0.8352633089516264 | 0.3284237715523345 | 0.3561650053304485 | T | T | T |
| 0.7908357833094631 | 0.4740221433350443 | 0.7171652437168899 | T | T | T |
| 0.3554029069262082 | 0.0617187918324999 | 0.7184185345978015 | T | T | T |
| 0.2979694191141740 | 0.0643524473589768 | 0.8944082939783194 | T | T | T |
| 0.2001273180934160 | 0.0501792743089980 | 0.0294069616797217 | T | T | T |
| 0.1025923784112305 | 0.0652388848512484 | 0.8952270651037260 | T | T | T |
| 0.1003418025980297 | 0.0556193137565835 | 0.6979912531561165 | T | T | T |
| 0.2268797755190043 | 0.0303622091702759 | 0.7362804459681329 | T | T | T |
| 0.3572018258730051 | 0.8248907426452390 | 0.7473710847437433 | T | T | T |
| 0.3032922913612594 | 0.8425033494179963 | 0.9232472788452528 | T | T | T |
| 0.1895425939825779 | 0.8505787577253630 | 0.0230339554468581 | T | T | T |
| 0.0847717552684898 | 0.8306619245191935 | 0.9054484018611907 | T | T | T |
| 0.1005816382206946 | 0.8364725121405002 | 0.7094636114195377 | T | T | T |
| 0.2273274439152825 | 0.8531196314481373 | 0.7616848563999674 | T | T | T |
| 0.3189896349518798 | 0.9466756694883119 | 0.8022653043361052 | T | T | T |
| 0.0785556491173105 | 0.9478875810602260 | 0.8122902701602839 | T | T | T |
| 0.4303639414200682 | 0.1262084454302121 | 0.5865615782702039 | T | T | T |
| 0.4157766592857596 | 0.9943857172256558 | 0.5699859434537609 | T | T | T |
| 0.3943038849295895 | 0.8624811672989697 | 0.5648224999860031 | T | T | T |
| 0.1925742038462719 | 0.1301609912858000 | 0.6123638223592426 | T | T | T |
| 0.1768446740111993 | 0.0029425244253650 | 0.5566978616415031 | T | T | T |
| 0.1906618258764325 | 0.8694729795233619 | 0.5707178179671980 | T | T | T |
| 0.9880496579354885 | 0.0457544940882438 | 0.7949265269865737 | T | T | T |
| 0.9806644339905523 | 0.8584094630375855 | 0.7904090785796081 | T | T | T |
| 0.1403132875796018 | 0.9382706700253161 | 0.2203647963716222 | T | T | T |
| 0.1978155360090716 | 0.9295335001173427 | 0.3960105119546301 | T | T | T |
| 0.2952049224226312 | 0.9477797595768422 | 0.5303372484126724 | T | T | T |
| 0.3939322030509754 | 0.9310021746818190 | 0.3979825653469947 | T | T | T |
| 0.3956473702709469 | 0.9447456147311196 | 0.2007076761135945 | T | T | T |
| 0.2689241067989721 | 0.9682794016604956 | 0.2394219850970515 | T | T | T |
| 0.1408925572636260 | 0.1689708227825911 | 0.2417732875560704 | T | T | T |
| 0.1946234002609921 | 0.1606760165445040 | 0.4186762300918782 | T | T | T |
| 0.3082281484461520 | 0.1472345992338511 | 0.5183780812821019 | T | T | T |
| 0.4122162329130025 | 0.1706300472547508 | 0.4005207672864625 | T | T | T |
| 0.3961800174923467 | 0.1565136655860035 | 0.2053206457097246 | T | T | T |

**Structure files (CONTCAR) involved in this work:**

|                    |                    |                    |   |   |   |
|--------------------|--------------------|--------------------|---|---|---|
| 0.2700476185886201 | 0.1385577497930503 | 0.2584057812834059 | T | T | T |
| 0.1773287622630852 | 0.0499155628183705 | 0.3127957504162013 | T | T | T |
| 0.4171070425676852 | 0.0499055301605930 | 0.3204675595931261 | T | T | T |
| 0.0667077796857298 | 0.8693609166096682 | 0.0936559140432435 | T | T | T |
| 0.0807672030437701 | 0.9999516847039719 | 0.0652023885748782 | T | T | T |
| 0.0978215764572866 | 0.1326185221355748 | 0.0622897913702662 | T | T | T |
| 0.3043802789649466 | 0.8671913567995613 | 0.1186224657192383 | T | T | T |
| 0.3176241971750982 | 0.9933924980654167 | 0.0578484926655638 | T | T | T |
| 0.3057498171004316 | 0.1271320099052978 | 0.0661295615066132 | T | T | T |
| 0.5081481065229966 | 0.9535423971873618 | 0.2974845642026975 | T | T | T |
| 0.5159001497173432 | 0.1372073054540362 | 0.2881519002738443 | T | T | T |
| 0.6283783344990652 | 0.5672794492396372 | 0.2633891180992574 | T | T | T |
| 0.6693322235340131 | 0.5552901141539655 | 0.0783658144769186 | T | T | T |
| 0.7909679872874126 | 0.5484376689182409 | 0.9952989974862815 | T | T | T |
| 0.9143432850550282 | 0.5514711127258122 | 0.0710353049589989 | T | T | T |
| 0.8956628884183686 | 0.5667323670357640 | 0.2713845282209105 | T | T | T |
| 0.7572923954984384 | 0.5730225827569418 | 0.2208141117440192 | T | T | T |
| 0.6417749918794996 | 0.3392874963214634 | 0.2712018202354802 | T | T | T |
| 0.7251529739163941 | 0.3398739973785919 | 0.1222598310446122 | T | T | T |
| 0.8109811965045974 | 0.3543729167970742 | 0.9734058554977943 | T | T | T |
| 0.9200261015803778 | 0.3362619285259996 | 0.0863821343596902 | T | T | T |
| 0.9087719750501954 | 0.3327262409710523 | 0.2887362339734031 | T | T | T |
| 0.7692298368371002 | 0.3722297532451290 | 0.3032601894206491 | T | T | T |
| 0.6886117285341984 | 0.4557779194330701 | 0.2063892362354163 | T | T | T |
| 0.9146315215273590 | 0.4475230968189992 | 0.1909800239089998 | T | T | T |
| 0.5642805904610680 | 0.6267584351034177 | 0.4129983698354555 | T | T | T |
| 0.6030155721901983 | 0.5016464620783339 | 0.4340490138643601 | T | T | T |
| 0.5818152622629397 | 0.3693164805791510 | 0.4441808203742960 | T | T | T |
| 0.8178986769287441 | 0.6420628066429164 | 0.3954122606762539 | T | T | T |
| 0.7958059618327191 | 0.5031407211333613 | 0.3951308931276896 | T | T | T |
| 0.8375509457114638 | 0.3824664322806967 | 0.4715436189508232 | T | T | T |
| 0.0129240777943185 | 0.5376045707425585 | 0.2026633227666465 | T | T | T |
| 0.0216052957487056 | 0.3692108928740286 | 0.2006895248940037 | T | T | T |
| 0.8734364463797848 | 0.4287443711105719 | 0.7254765776084066 | T | T | T |
| 0.8014712398194213 | 0.4718604038889766 | 0.5840721057466711 | T | T | T |
| 0.7020222777394534 | 0.4184670321013384 | 0.4799344215817502 | T | T | T |
| 0.6036559191367981 | 0.4364769434911071 | 0.6076176733145083 | T | T | T |
| 0.6006720536602533 | 0.4276117147245512 | 0.8041849532890616 | T | T | T |
| 0.7322586562735296 | 0.4226724236898978 | 0.7685233080261888 | T | T | T |
| 0.8644156667186852 | 0.6705991644567914 | 0.7334631939235351 | T | T | T |
| 0.7907336740783126 | 0.6305089355139510 | 0.5842872736377693 | T | T | T |
| 0.6905226387276353 | 0.6499845997994128 | 0.4585418736117099 | T | T | T |
| 0.5979567195748045 | 0.6566578312950481 | 0.6007670243315607 | T | T | T |
| 0.6038092808941256 | 0.6646009125132999 | 0.7980369970415560 | T | T | T |
| 0.7310516015888687 | 0.6760953157709895 | 0.7451322292425461 | T | T | T |
| 0.7949863917307454 | 0.5572811900298285 | 0.7498281161301980 | T | T | T |
| 0.5874313264152455 | 0.5464377183617961 | 0.7120168989986316 | T | T | T |
| 0.9285336066292009 | 0.3665424682507940 | 0.8896972984838039 | T | T | T |
| 0.8903533369557053 | 0.4941221901697718 | 0.8950839053881348 | T | T | T |
| 0.8873529555412430 | 0.6266535919195071 | 0.9182033607838522 | T | T | T |
| 0.6818147321675950 | 0.3774703595948405 | 0.9419699404282236 | T | T | T |
| 0.6821569806283290 | 0.5087301253483286 | 0.8972943973982087 | T | T | T |
| 0.7015644017451751 | 0.6376206904647913 | 0.9313183259738272 | T | T | T |

**Structure files (CONTCAR) involved in this work:**

|                    |                    |                    |   |   |   |
|--------------------|--------------------|--------------------|---|---|---|
| 0.4896721462291081 | 0.4555017536198973 | 0.7082116523812344 | T | T | T |
| 0.4886070321383220 | 0.6352028014399600 | 0.7100617757106629 | T | T | T |
| 0.6393216431124211 | 0.9392067010201380 | 0.2966951452256599 | T | T | T |
| 0.6907846314990889 | 0.9449978130541545 | 0.1164103271955831 | T | T | T |
| 0.7963057537909997 | 0.9471106487662008 | 0.9915974560581582 | T | T | T |
| 0.8995014441061100 | 0.9290229977334235 | 0.1132578394609300 | T | T | T |
| 0.8961676226759552 | 0.9428541139249852 | 0.3116677978827350 | T | T | T |
| 0.7697864250035171 | 0.9566782661225592 | 0.2697970482482874 | T | T | T |
| 0.6402153388632978 | 0.1779921471524672 | 0.2578919992842528 | T | T | T |
| 0.6980467878809927 | 0.1480241928979192 | 0.0900775589985893 | T | T | T |
| 0.8078438933667583 | 0.1477888387464587 | 0.9832005179168969 | T | T | T |
| 0.9059807118111576 | 0.1721611415337858 | 0.1130568442649236 | T | T | T |
| 0.8980333691793415 | 0.1552721349271998 | 0.3093747828545078 | T | T | T |
| 0.7717582607190144 | 0.1567087076137891 | 0.2549078877097269 | T | T | T |
| 0.6852321915693287 | 0.0554494320568545 | 0.2313810180885440 | T | T | T |
| 0.9153790026091079 | 0.0493391732742978 | 0.1908063880992660 | T | T | T |
| 0.5651482420715361 | 0.8757371090091997 | 0.4311374342600983 | T | T | T |
| 0.5787938637530765 | 0.0078900386729180 | 0.4439810413608777 | T | T | T |
| 0.6042194465938716 | 0.1385364426166565 | 0.4399148359591106 | T | T | T |
| 0.8078091017862057 | 0.8609763700796018 | 0.3982691787752758 | T | T | T |
| 0.8130566628261703 | 0.9881139552098751 | 0.4522396584798644 | T | T | T |
| 0.8053492555392517 | 0.1215582696402046 | 0.4408479799699266 | T | T | T |
| 0.0095428981669016 | 0.9555218088270178 | 0.2185463367773009 | T | T | T |
| 0.0137550051046889 | 0.1370313100251169 | 0.2178671189893322 | T | T | T |
| 0.8581798380970874 | 0.0692670653695795 | 0.7947697298413122 | T | T | T |
| 0.8065211002185323 | 0.0608664082731957 | 0.6139882550529409 | T | T | T |
| 0.6994760810899875 | 0.0503576096786351 | 0.4933724922113687 | T | T | T |
| 0.5963822860426725 | 0.0766768602872176 | 0.6123295113480024 | T | T | T |
| 0.6012262467138895 | 0.0572075540905979 | 0.8096548894211055 | T | T | T |
| 0.7280657126459200 | 0.0433997100210922 | 0.7673722637947183 | T | T | T |
| 0.8527656836514224 | 0.8259358713999702 | 0.7661977573243884 | T | T | T |
| 0.7987285471365007 | 0.8600660438724476 | 0.5947473785816475 | T | T | T |
| 0.6888812846396594 | 0.8497916355539281 | 0.4860696933066413 | T | T | T |
| 0.5888090897871855 | 0.8299574655408181 | 0.6145874051834148 | T | T | T |
| 0.5963421427830456 | 0.8528706672500942 | 0.8089319249243379 | T | T | T |
| 0.7238694695555191 | 0.8599082643273257 | 0.7584482615314768 | T | T | T |
| 0.8200582350270199 | 0.9514492008535240 | 0.7320509972030194 | T | T | T |
| 0.5804013469210701 | 0.9545808071877534 | 0.6829780282611549 | T | T | T |
| 0.9340917228438335 | 0.1226190536260474 | 0.9344264193196959 | T | T | T |
| 0.9150266920739829 | 0.9914834328283907 | 0.9378820805124891 | T | T | T |
| 0.8954511122666643 | 0.8605450887143794 | 0.9468156212837623 | T | T | T |
| 0.6892895182180344 | 0.1398858008191877 | 0.8932888440556364 | T | T | T |
| 0.6847985267282988 | 0.0134679520426626 | 0.9501784844344439 | T | T | T |
| 0.6863136333344639 | 0.8797698782366338 | 0.9484616161333205 | T | T | T |
| 0.4867307484836163 | 0.0465961610105468 | 0.7186824756415521 | T | T | T |
| 0.4808603761182657 | 0.8680663664498910 | 0.7167868807355630 | T | T | T |
| 0.3589902206476619 | 0.4428122559201681 | 0.7060454999008726 | T | T | T |
| 0.3049860972469139 | 0.4254842853450936 | 0.8827578248405287 | T | T | T |
| 0.2067836099602844 | 0.4445593385264844 | 0.0139001792178549 | T | T | T |
| 0.1069017162435732 | 0.4274024027461892 | 0.8831982626923626 | T | T | T |
| 0.1045562575603511 | 0.4526445774778838 | 0.6862951999277909 | T | T | T |
| 0.2309140014296140 | 0.4685705471958743 | 0.7310171670054828 | T | T | T |
| 0.3603947268176845 | 0.6638477754148080 | 0.7298362752124454 | T | T | T |

**Structure files (CONTCAR) involved in this work:**

|                    |                    |                    |   |   |   |
|--------------------|--------------------|--------------------|---|---|---|
| 0.3011396345967118 | 0.6670999289132628 | 0.9033353934945544 | T | T | T |
| 0.1926784736775028 | 0.6450853657416756 | 0.0124962994720649 | T | T | T |
| 0.0904667207095719 | 0.6733039064417755 | 0.8931473155497934 | T | T | T |
| 0.1030817703286861 | 0.6542402595744715 | 0.6970725527160903 | T | T | T |
| 0.2304196866895187 | 0.6365874095409330 | 0.7418660977872541 | T | T | T |
| 0.3194201675647045 | 0.5497914237563191 | 0.8125211534579337 | T | T | T |
| 0.0839445148552143 | 0.5506675486357295 | 0.8201804330377075 | T | T | T |
| 0.4328184012024897 | 0.3752876191898314 | 0.5757690831168047 | T | T | T |
| 0.4204599426872334 | 0.5067135853965257 | 0.5566802047471132 | T | T | T |
| 0.4085736029842726 | 0.6389865820204199 | 0.5492691931758917 | T | T | T |
| 0.1923025052066059 | 0.3724060290069670 | 0.6024982090189241 | T | T | T |
| 0.1846853749499502 | 0.5002602490914368 | 0.5481235559109559 | T | T | T |
| 0.1901365235538106 | 0.6343117836371859 | 0.5512409587793459 | T | T | T |
| 0.9943648237279789 | 0.4555807495990528 | 0.7812734474633164 | T | T | T |
| 0.9857226057782574 | 0.6362205991384032 | 0.7818122912470771 | T | T | T |
| 0.1424175690683613 | 0.5575169168454955 | 0.2118430219777251 | T | T | T |
| 0.2080742547728499 | 0.5685649830921433 | 0.3829670001327197 | T | T | T |
| 0.3005774173379790 | 0.5615615767287485 | 0.5305397291732789 | T | T | T |
| 0.3898680591339913 | 0.5669935763038960 | 0.3853615047481041 | T | T | T |
| 0.4000703297932841 | 0.5515149481038163 | 0.1901748754995784 | T | T | T |
| 0.2715605641474600 | 0.5294729164821337 | 0.2202696716585164 | T | T | T |
| 0.1443837447950533 | 0.3291725582461070 | 0.2343064277506109 | T | T | T |
| 0.1976239189358593 | 0.3366043533028885 | 0.4111914467951376 | T | T | T |
| 0.3093448956444410 | 0.3534540034571140 | 0.5142214279236758 | T | T | T |
| 0.4106788742170791 | 0.3253165227307974 | 0.3929271916979719 | T | T | T |
| 0.3965905105855953 | 0.3357936319222271 | 0.1955279738613870 | T | T | T |
| 0.2728196759629321 | 0.3572482644147489 | 0.2491112778830520 | T | T | T |
| 0.1834742684885800 | 0.4480079535731535 | 0.3058963264117593 | T | T | T |
| 0.4077010911163875 | 0.4449231619085813 | 0.3101862261789304 | T | T | T |
| 0.0701351508373054 | 0.6208241908346207 | 0.0747750426467960 | T | T | T |
| 0.0875650443302533 | 0.4902245158977623 | 0.0561180967666488 | T | T | T |
| 0.1075275279509105 | 0.3577522463862174 | 0.0484212619387737 | T | T | T |
| 0.3123253392003056 | 0.6236823983408507 | 0.0909782324530689 | T | T | T |
| 0.3270998859418220 | 0.4936000111724468 | 0.0488744317346860 | T | T | T |
| 0.3060510213734867 | 0.3604956638491976 | 0.0545446959258100 | T | T | T |
| 0.5064459725936745 | 0.5322108076749947 | 0.3040913103077573 | T | T | T |
| 0.5122159491157484 | 0.3628016482741324 | 0.2763023567290311 | T | T | T |
| 0.4410902004842885 | 0.7509194675267206 | 0.6414956774126283 | T | T | T |
| 0.1923028651704356 | 0.7489725078347352 | 0.6483309568120769 | T | T | T |
| 0.2734336722718139 | 0.7474514859530719 | 0.0553510194314480 | T | T | T |
| 0.1087322231214575 | 0.7466477842145016 | 0.0541307599547141 | T | T | T |
| 0.0620746141478434 | 0.2488506877124318 | 0.1360806392103904 | T | T | T |
| 0.3032561133053032 | 0.2453585547388145 | 0.1492840365965211 | T | T | T |
| 0.2271268404327216 | 0.2506113308098526 | 0.5561625216733194 | T | T | T |
| 0.3906213709717604 | 0.2506095527229922 | 0.5532874697269067 | T | T | T |
| 0.5595160594754151 | 0.2526677548101616 | 0.3639376474044324 | T | T | T |
| 0.8163900918410644 | 0.2473411596449641 | 0.3895382732680744 | T | T | T |
| 0.7246701569686824 | 0.2536342917832236 | 0.9728015206332359 | T | T | T |
| 0.8919114181431259 | 0.2473544341013639 | 0.9489934695203077 | T | T | T |
| 0.9323225337101788 | 0.7450956200270843 | 0.8660249738304340 | T | T | T |
| 0.6799285181121905 | 0.7600863652317588 | 0.8764752076786021 | T | T | T |
| 0.7764159385793614 | 0.7491010304418408 | 0.4953871042904052 | T | T | T |
| 0.6013290804822650 | 0.7497611739482914 | 0.4591664168400845 | T | T | T |

**Structure files (CONTCAR) involved in this work:**

|                    |                    |                    |   |   |   |
|--------------------|--------------------|--------------------|---|---|---|
| 0.8878490526900540 | 0.4277089600135552 | 0.5795778502074879 | T | T | T |
| 0.9551446832146236 | 0.6245810794638120 | 0.5298860060451245 | T | T | T |
| 0.8746958313972626 | 0.5773722765312421 | 0.5192679494879383 | T | T | T |
| 0.9340643400076415 | 0.5783913673399707 | 0.4097705036215736 | T | T | T |
| 0.9752886557423247 | 0.4665585831316066 | 0.4472985194959407 | T | T | T |
| 0.9520773410444490 | 0.5310607094225179 | 0.5428181003021250 | T | T | T |
| 0.0157002728828122 | 0.4719662996530701 | 0.5697638459167326 | T | T | T |
| 0.9243322553465398 | 0.5879812673070340 | 0.4892761132511534 | T | T | T |
| 0.9686610382145580 | 0.4748745312900833 | 0.5274977921766164 | T | T | T |

**Figure 5(c) TS2**

Si Al O Ga H C

1.0000000000000000

20.0219999999999985 0.0000000000000000 0.0000000000000000

0.0000000000000000 19.8990000000000009 0.0000000000000000

0.0000000000000000 0.0000000000000000 13.3829999999999991

93 3 192 1 6 2

Selective dynamics

Direct

|                    |                    |                    |   |   |   |
|--------------------|--------------------|--------------------|---|---|---|
| 0.4221048503143044 | 0.0568894069847847 | 0.6480589011657698 | T | T | T |
| 0.3008747925239770 | 0.0265906640044392 | 0.7888589464473542 | T | T | T |
| 0.2797914267509057 | 0.0602855202808203 | 0.0122704547533229 | T | T | T |
| 0.1201822904473666 | 0.0632255161053904 | 0.0127958271598750 | T | T | T |
| 0.0673098644207748 | 0.0294653821003215 | 0.8001575777140859 | T | T | T |
| 0.1758414061825570 | 0.0555347802862798 | 0.6508738780845710 | T | T | T |
| 0.4189513604418649 | 0.8270845319832221 | 0.6701136337780189 | T | T | T |
| 0.3012791167100349 | 0.8682682621867256 | 0.8091972518385480 | T | T | T |
| 0.2668798988383741 | 0.8280527188105032 | 0.0294618967424519 | T | T | T |
| 0.1119029074587596 | 0.8261698230636244 | 0.0173344115578426 | T | T | T |
| 0.0613760348559580 | 0.8705022182715276 | 0.8030242826676052 | T | T | T |
| 0.1785710203108682 | 0.8277905900783951 | 0.6734660212020678 | T | T | T |
| 0.0745947480182408 | 0.9426639839171436 | 0.1502527174210370 | T | T | T |
| 0.1957315851410470 | 0.9726549481835471 | 0.2929985312883977 | T | T | T |
| 0.2163456775867683 | 0.9367847728176317 | 0.5143607671450904 | T | T | T |
| 0.3756842588218620 | 0.9338928150777190 | 0.5157542530572405 | T | T | T |
| 0.4290971459064070 | 0.9697292328256087 | 0.3049435102419284 | T | T | T |
| 0.3203256299702470 | 0.9446151100698911 | 0.1546712098784531 | T | T | T |
| 0.0782533032821170 | 0.1725950094185754 | 0.1646884236841842 | T | T | T |
| 0.1956354528600245 | 0.1300366245506264 | 0.3073150474592632 | T | T | T |
| 0.2307380447408703 | 0.1727497254311160 | 0.5248048435555593 | T | T | T |
| 0.3853053027521907 | 0.1737253304134695 | 0.5131397966571501 | T | T | T |
| 0.4355334332220998 | 0.1278302660589628 | 0.3025813501047211 | T | T | T |
| 0.3184557782265689 | 0.1675424453892755 | 0.1708522873923329 | T | T | T |
| 0.5812252738449295 | 0.5554722500576676 | 0.3508282270894770 | T | T | T |
| 0.6925463028094642 | 0.5320469228750591 | 0.1895535898026987 | T | T | T |
| 0.7136864473218995 | 0.5654978233399026 | 0.9752358461544044 | T | T | T |
| 0.8719948037253026 | 0.5624788874577594 | 0.9786309770656051 | T | T | T |
| 0.9333212830769653 | 0.5310735965296235 | 0.1892602984000172 | T | T | T |
| 0.5753103771625803 | 0.3294611193918587 | 0.3373042595510184 | T | T | T |
| 0.7040545628938923 | 0.3758296002304813 | 0.2176736677215156 | T | T | T |
| 0.7330945320479418 | 0.3293368075575481 | 0.9992360022332746 | T | T | T |
| 0.8846427726251197 | 0.3267117607721496 | 0.9826717318840499 | T | T | T |
| 0.9385805847794234 | 0.3742795795253666 | 0.1925829413347424 | T | T | T |
| 0.9269390285057185 | 0.4393512397998640 | 0.8420956420392144 | T | T | T |

**Structure files (CONTCAR) involved in this work:**

|                    |                    |                    |   |   |   |
|--------------------|--------------------|--------------------|---|---|---|
| 0.7776735132432651 | 0.4445983200524805 | 0.4761376576196387 | T | T | T |
| 0.6218072456795080 | 0.4309358291554189 | 0.4923059251780078 | T | T | T |
| 0.5685002906035459 | 0.4679533848432492 | 0.7082820449932036 | T | T | T |
| 0.6721870326989081 | 0.4341728720534409 | 0.8583308025687943 | T | T | T |
| 0.9174602650331805 | 0.6731802998768113 | 0.8272370878975897 | T | T | T |
| 0.7985010953693329 | 0.6353174950013666 | 0.6964008876640053 | T | T | T |
| 0.7675025855891509 | 0.6687608790699213 | 0.4776694612461319 | T | T | T |
| 0.6116129544932261 | 0.6705064461686371 | 0.4879880884924176 | T | T | T |
| 0.5645036702701590 | 0.6267705365881719 | 0.7068680618993198 | T | T | T |
| 0.6814734765682160 | 0.6826487923622097 | 0.8268439860621349 | T | T | T |
| 0.5739438998550387 | 0.9434875213586222 | 0.3656889168762617 | T | T | T |
| 0.6946421601714431 | 0.9742606936725010 | 0.2243794430317420 | T | T | T |
| 0.7167001526567023 | 0.9433335976064009 | 0.0006882104395633 | T | T | T |
| 0.8768346292731994 | 0.9337914393056883 | 0.9957516425466912 | T | T | T |
| 0.9296570773262970 | 0.9703225258386121 | 0.2071424136264362 | T | T | T |
| 0.8202169670880947 | 0.9416162013250188 | 0.3578743814797035 | T | T | T |
| 0.5788361367593599 | 0.1747228992798689 | 0.3373525142348545 | T | T | T |
| 0.6975184271605818 | 0.1326508738337043 | 0.2039340698248639 | T | T | T |
| 0.7302226130215064 | 0.1727272389573143 | 0.9817539665088930 | T | T | T |
| 0.8845716029964167 | 0.1731710031207115 | 0.9941381394947018 | T | T | T |
| 0.9332061731468714 | 0.1289541139244035 | 0.2059039852327136 | T | T | T |
| 0.8199623301094258 | 0.1716863766568527 | 0.3430758245128387 | T | T | T |
| 0.9230647855151853 | 0.0576048510559504 | 0.8627599312089528 | T | T | T |
| 0.8034370900079160 | 0.0308031052798498 | 0.7237842752980091 | T | T | T |
| 0.7804537592157766 | 0.0596366301987714 | 0.4979493675802280 | T | T | T |
| 0.6205002710881123 | 0.0674789400171903 | 0.4952867163005303 | T | T | T |
| 0.5673846612230519 | 0.0321496604086458 | 0.7041568991443877 | T | T | T |
| 0.6764349983491451 | 0.0590757613353124 | 0.8564426305068016 | T | T | T |
| 0.9172407312900707 | 0.8259707334002080 | 0.8401781326065632 | T | T | T |
| 0.8009093610576765 | 0.8748778402800406 | 0.7072126634745330 | T | T | T |
| 0.7663102030565221 | 0.8301880803593531 | 0.4893297298074502 | T | T | T |
| 0.6112587069162949 | 0.8255468148193106 | 0.4971122254454417 | T | T | T |
| 0.5615562556701689 | 0.8752575207715242 | 0.7044119192041177 | T | T | T |
| 0.6760664025701262 | 0.8382721199102230 | 0.8406600947381184 | T | T | T |
| 0.4236873322036164 | 0.4452987182296417 | 0.6391556160092915 | T | T | T |
| 0.3041721875888239 | 0.4732309619911449 | 0.7869713324857591 | T | T | T |
| 0.2862998006555494 | 0.4331494966618601 | 0.0052836130229398 | T | T | T |
| 0.1281254006248224 | 0.4321383788821267 | 0.0027648188777077 | T | T | T |
| 0.0749322755273856 | 0.4724905388061189 | 0.7957435339873165 | T | T | T |
| 0.1818764380210376 | 0.4492802470029311 | 0.6441375267176637 | T | T | T |
| 0.4237810757318787 | 0.6722298030804599 | 0.6638229472752080 | T | T | T |
| 0.3012055654067342 | 0.6300649187085392 | 0.7988292130300546 | T | T | T |
| 0.2695570097997201 | 0.6720039826973991 | 0.0174879619159887 | T | T | T |
| 0.1151608143246114 | 0.6729660673472853 | 0.0083850699733042 | T | T | T |
| 0.0646687237120784 | 0.6298745190052861 | 0.7989083471014137 | T | T | T |
| 0.1788390422755840 | 0.6692518547855539 | 0.6629691083375628 | T | T | T |
| 0.0790873835899946 | 0.5530082872723269 | 0.1364492542003564 | T | T | T |
| 0.2011347839926069 | 0.5278828450579565 | 0.2801806634217601 | T | T | T |
| 0.2222194918318825 | 0.5678752404996531 | 0.5020567276557282 | T | T | T |
| 0.3825259480690991 | 0.5698316292310408 | 0.5049031570012897 | T | T | T |
| 0.4322678053079612 | 0.5270986980491682 | 0.2963304282919836 | T | T | T |
| 0.3278841360146872 | 0.5523481233546531 | 0.1415837143707789 | T | T | T |
| 0.0831030326109738 | 0.3275201302541418 | 0.1555914220532018 | T | T | T |

**Structure files (CONTCAR) involved in this work:**

|                    |                    |                    |   |   |   |
|--------------------|--------------------|--------------------|---|---|---|
| 0.1982658240463962 | 0.3698105346747855 | 0.3020587054861714 | T | T | T |
| 0.2317893768979684 | 0.3293405024749271 | 0.5220617966789938 | T | T | T |
| 0.3859599507738455 | 0.3270254795629311 | 0.5098164638904451 | T | T | T |
| 0.4329369088089829 | 0.3704188076799536 | 0.2957465865251194 | T | T | T |
| 0.3186699852036153 | 0.3258839644862873 | 0.1651260912191838 | T | T | T |
| 0.8153112473530308 | 0.5681431633726631 | 0.3206851920730353 | T | T | T |
| 0.8308446038345784 | 0.3315879049899838 | 0.3466139348978399 | T | T | T |
| 0.7891061607759552 | 0.4769969379243302 | 0.7270920610719763 | T | T | T |
| 0.3566919012652560 | 0.0620825107458622 | 0.7190447837159785 | T | T | T |
| 0.2991204397866690 | 0.0657018895293539 | 0.8950981025178482 | T | T | T |
| 0.1997339580397892 | 0.0510941688495852 | 0.0278943947147822 | T | T | T |
| 0.1013593124670971 | 0.0667796251237947 | 0.8953897302441649 | T | T | T |
| 0.1011394744920908 | 0.0571732992526943 | 0.6978877350279420 | T | T | T |
| 0.2277812650093165 | 0.0322297411184498 | 0.7373887752695101 | T | T | T |
| 0.3567983513988924 | 0.8259761622627064 | 0.7478127391338297 | T | T | T |
| 0.3037672700365510 | 0.8433253499614247 | 0.9241074752534089 | T | T | T |
| 0.1891681788679510 | 0.8519066644193648 | 0.0209276902231197 | T | T | T |
| 0.0837695013744288 | 0.8319634229962134 | 0.9043540884324027 | T | T | T |
| 0.1011956936103703 | 0.8376867696549558 | 0.7084889231295759 | T | T | T |
| 0.2272793779370569 | 0.8546489653268657 | 0.7626354501816489 | T | T | T |
| 0.3192970632958577 | 0.9477397703743462 | 0.8036158251794314 | T | T | T |
| 0.0804660553189739 | 0.9493794162691060 | 0.8117199966463566 | T | T | T |
| 0.4300645888486435 | 0.1265351163397011 | 0.5855385173362795 | T | T | T |
| 0.4162368043994042 | 0.9946631074336590 | 0.5695994705321183 | T | T | T |
| 0.3961805418922904 | 0.8626175286113374 | 0.5661092585879772 | T | T | T |
| 0.1930845255860674 | 0.1305746490446857 | 0.6114232183018731 | T | T | T |
| 0.1778962013462715 | 0.0023603580876140 | 0.5586803797587879 | T | T | T |
| 0.1922892125168320 | 0.8685951458693422 | 0.5704305328797773 | T | T | T |
| 0.9881841327912393 | 0.0461509405968893 | 0.7927136160263936 | T | T | T |
| 0.9812819524427486 | 0.8621818099103580 | 0.7870359554779295 | T | T | T |
| 0.1401622653034466 | 0.9390753280616586 | 0.2209323640757478 | T | T | T |
| 0.1978593230028790 | 0.9303476933427237 | 0.3967599747230580 | T | T | T |
| 0.2961872476764563 | 0.9473515244342301 | 0.5304042783341146 | T | T | T |
| 0.3947798706841023 | 0.9302060415265483 | 0.3982860298764578 | T | T | T |
| 0.3951432353428607 | 0.9451427181087549 | 0.2010308180604466 | T | T | T |
| 0.2686773180832578 | 0.9698412308089640 | 0.2405467939905225 | T | T | T |
| 0.1408292971937031 | 0.1698650119003118 | 0.2412856262886733 | T | T | T |
| 0.1937001572737197 | 0.1622960229529692 | 0.4183138833777234 | T | T | T |
| 0.3079912686902255 | 0.1478863502325820 | 0.5162170367219659 | T | T | T |
| 0.4126712950742605 | 0.1711173182722850 | 0.3994894535501417 | T | T | T |
| 0.3957064495060370 | 0.1557388503352194 | 0.2047524632337641 | T | T | T |
| 0.2697447005684727 | 0.1392000140106383 | 0.2590856000970418 | T | T | T |
| 0.1766421514370270 | 0.0508312518520225 | 0.3137681373055203 | T | T | T |
| 0.4167415224464601 | 0.0496652431052901 | 0.3215859861849932 | T | T | T |
| 0.0667015380626585 | 0.8711777070562934 | 0.0924639194174024 | T | T | T |
| 0.0805005774230678 | 0.0019443190042214 | 0.0667306490412437 | T | T | T |
| 0.0977420950118284 | 0.1342465406838480 | 0.0617147837995286 | T | T | T |
| 0.3029319074650010 | 0.8687047375196666 | 0.1193060294141264 | T | T | T |
| 0.3172535548891365 | 0.9949724769084100 | 0.0590238448988946 | T | T | T |
| 0.3042090074808296 | 0.1288893860785140 | 0.0663847321417178 | T | T | T |
| 0.5081871374270579 | 0.9536475551717974 | 0.2964840256161544 | T | T | T |
| 0.5154829217934218 | 0.1363298448971449 | 0.2857728717862468 | T | T | T |
| 0.6394727894290937 | 0.5636787333109902 | 0.2692532845844086 | T | T | T |

**Structure files (CONTCAR) involved in this work:**

|                    |                    |                    |   |   |   |
|--------------------|--------------------|--------------------|---|---|---|
| 0.6747388467691340 | 0.5654564221624345 | 0.0809923536573030 | T | T | T |
| 0.7929332445765995 | 0.5481695905535664 | 0.9895001421984436 | T | T | T |
| 0.9107764783927670 | 0.5663054725744516 | 0.0839158600313896 | T | T | T |
| 0.8990863057996715 | 0.5609581617039623 | 0.2870441865702044 | T | T | T |
| 0.7677043152763181 | 0.5501237436153649 | 0.2168445139556676 | T | T | T |
| 0.6413767618403424 | 0.3370514034150661 | 0.2698231286081086 | T | T | T |
| 0.7235188527683061 | 0.3313231395180851 | 0.1190845689077618 | T | T | T |
| 0.8087766322051624 | 0.3555810895470742 | 0.9713824846645632 | T | T | T |
| 0.9117829393404917 | 0.3320139390078051 | 0.0958288074669371 | T | T | T |
| 0.9093520347806789 | 0.3453759351260567 | 0.2960467618719748 | T | T | T |
| 0.7670032760724652 | 0.3778676913038699 | 0.2931190609156562 | T | T | T |
| 0.6800210285240191 | 0.4504587589794425 | 0.1838677319370764 | T | T | T |
| 0.9168802999987159 | 0.4514693861155553 | 0.1740524038893369 | T | T | T |
| 0.5682659877345567 | 0.6260700253770061 | 0.4089822379376605 | T | T | T |
| 0.6019238018443407 | 0.4991738503831314 | 0.4341872548645923 | T | T | T |
| 0.5841027269631353 | 0.3665624167522830 | 0.4451979871296046 | T | T | T |
| 0.8012453221981485 | 0.6451029068491607 | 0.3764142481356860 | T | T | T |
| 0.7964727237059743 | 0.5067464323630031 | 0.4113205842847724 | T | T | T |
| 0.8384655505037600 | 0.3828592331442544 | 0.4663101882049091 | T | T | T |
| 0.0140541350817071 | 0.5403911841512319 | 0.2046668309267047 | T | T | T |
| 0.0200197188461931 | 0.3700586115821968 | 0.1971994610924008 | T | T | T |
| 0.8728698750403898 | 0.4319442400308807 | 0.7437577884053717 | T | T | T |
| 0.8013185377257124 | 0.4622797385128196 | 0.5956794777971615 | T | T | T |
| 0.7026026520222008 | 0.4174413148208659 | 0.4839851714672989 | T | T | T |
| 0.6026447780346559 | 0.4359656339183113 | 0.6089974942501325 | T | T | T |
| 0.5987117814391828 | 0.4300613781656191 | 0.8059174680096222 | T | T | T |
| 0.7305420123835061 | 0.4251677431177545 | 0.7753109826399835 | T | T | T |
| 0.8635058137922569 | 0.6763003616266720 | 0.7373363788780862 | T | T | T |
| 0.8038101433423855 | 0.6340922466893282 | 0.5755131079874116 | T | T | T |
| 0.6887456362124506 | 0.6464495229937434 | 0.4851140396958671 | T | T | T |
| 0.5819965659314287 | 0.6595626136156217 | 0.5995413588674815 | T | T | T |
| 0.6046634317600638 | 0.6654124256812661 | 0.7954659469935765 | T | T | T |
| 0.7293315452386182 | 0.6729001998764672 | 0.7290343109989441 | T | T | T |
| 0.7992569799555169 | 0.5605892960549475 | 0.7451291522016159 | T | T | T |
| 0.5855133157080826 | 0.5478432492166195 | 0.7097440947289437 | T | T | T |
| 0.9306453188782731 | 0.3698743218871016 | 0.9034833137869871 | T | T | T |
| 0.9020903128664703 | 0.5005836558149315 | 0.9095486429263826 | T | T | T |
| 0.8869578117655269 | 0.6325018672764279 | 0.9215638256796377 | T | T | T |
| 0.6782941010802469 | 0.3760866471724869 | 0.9433001760407149 | T | T | T |
| 0.6792497274389059 | 0.5086666659725411 | 0.9057960130835773 | T | T | T |
| 0.7061680982002693 | 0.6376269207534957 | 0.9204739958766061 | T | T | T |
| 0.4883537016150443 | 0.4567813191273942 | 0.7092786444649068 | T | T | T |
| 0.4841666497236166 | 0.6352474299085914 | 0.7245626119939205 | T | T | T |
| 0.6391760128950889 | 0.9383418119677700 | 0.2944446438663637 | T | T | T |
| 0.6944077433146365 | 0.9375746969946012 | 0.1163984640754045 | T | T | T |
| 0.7973154746215655 | 0.9483915896808141 | 0.9881722696434614 | T | T | T |
| 0.8996377292454826 | 0.9297670084323668 | 0.1116836658778184 | T | T | T |
| 0.8947335641382275 | 0.9442606764093123 | 0.3096124254233351 | T | T | T |
| 0.7685145114103371 | 0.9659990649741537 | 0.2718282027572588 | T | T | T |
| 0.6406362944508043 | 0.1764670424019488 | 0.2597560862572039 | T | T | T |
| 0.6961041654581825 | 0.1540437974240344 | 0.0875040063866998 | T | T | T |
| 0.8077661734721897 | 0.1472116570613044 | 0.9838959627164888 | T | T | T |
| 0.9073149793141253 | 0.1726192570603533 | 0.1103873973386526 | T | T | T |



**Structure files (CONTCAR) involved in this work:**

|                    |                    |                    |   |   |   |
|--------------------|--------------------|--------------------|---|---|---|
| 0.8965735931569782 | 0.1558766434078996 | 0.3062471842121034 | T | T | T |
| 0.7704360954150204 | 0.1474673578507787 | 0.2521919039084390 | T | T | T |
| 0.6776891452027856 | 0.0537154157550034 | 0.2142348437724744 | T | T | T |
| 0.9161754819337296 | 0.0499828574208039 | 0.1882479096077725 | T | T | T |
| 0.5648747572778684 | 0.8740995357410235 | 0.4283581556328408 | T | T | T |
| 0.5795144463055448 | 0.0061015279441878 | 0.4435787784473446 | T | T | T |
| 0.6011165813761328 | 0.1376269344165337 | 0.4404267878400317 | T | T | T |
| 0.8034771036569991 | 0.8655203033469622 | 0.3944490779486590 | T | T | T |
| 0.8162269790044622 | 0.9930080701220941 | 0.4522908189907254 | T | T | T |
| 0.8050618536518878 | 0.1273817171746839 | 0.4427845283587788 | T | T | T |
| 0.0092337721950679 | 0.9558165052143848 | 0.2188404190704965 | T | T | T |
| 0.0136762314476423 | 0.1384431358483864 | 0.2180422292013504 | T | T | T |
| 0.8580054786858101 | 0.0695826037801433 | 0.7925053098486754 | T | T | T |
| 0.8021552590264047 | 0.0653651540317856 | 0.6144114666841639 | T | T | T |
| 0.6998642792866194 | 0.0519799570761972 | 0.4858856907167389 | T | T | T |
| 0.5991742740236696 | 0.0748873501657586 | 0.6119476029013377 | T | T | T |
| 0.6019791917438764 | 0.0538115161525869 | 0.8091024275411863 | T | T | T |
| 0.7291315908340056 | 0.0363337078456854 | 0.7708039657551228 | T | T | T |
| 0.8539658327714849 | 0.8271230531701164 | 0.7647264929019715 | T | T | T |
| 0.8020021153672933 | 0.8574994772645097 | 0.5899690627917463 | T | T | T |
| 0.6878811776041317 | 0.8523676696902455 | 0.4897479155346483 | T | T | T |
| 0.5862092585550880 | 0.8279668969627995 | 0.6126357977129779 | T | T | T |
| 0.5992977169621784 | 0.8521645627852733 | 0.8062083641796622 | T | T | T |
| 0.7261768361955609 | 0.8642976465125581 | 0.7525274624639458 | T | T | T |
| 0.8251328654037511 | 0.9522662842032575 | 0.7208604925984505 | T | T | T |
| 0.5797935872721124 | 0.9530299511483451 | 0.6798698793506298 | T | T | T |
| 0.9338620714040295 | 0.1251016243455646 | 0.9295435833585790 | T | T | T |
| 0.9157276444108515 | 0.9939361715888374 | 0.9378287241670012 | T | T | T |
| 0.8970404700734511 | 0.8626398759868853 | 0.9444232245832438 | T | T | T |
| 0.6905851157985451 | 0.1359619097409266 | 0.8911021537605047 | T | T | T |
| 0.6826864014906402 | 0.0103737824110943 | 0.9534343928063028 | T | T | T |
| 0.6902508604219669 | 0.8766011064579580 | 0.9448272546271990 | T | T | T |
| 0.4880405742460872 | 0.0471958655711161 | 0.7166843230870326 | T | T | T |
| 0.4813351398923172 | 0.8671769705159913 | 0.7205201408979865 | T | T | T |
| 0.3578659228830008 | 0.4428594589688338 | 0.7092770346520287 | T | T | T |
| 0.305462337754814  | 0.4277457437981135 | 0.8876376013932459 | T | T | T |
| 0.2067985742756963 | 0.4486380486011763 | 0.0175011161959664 | T | T | T |
| 0.1086751862253291 | 0.4287047778407087 | 0.8843809230425516 | T | T | T |
| 0.1053056958463310 | 0.4538943783726855 | 0.6863572984446304 | T | T | T |
| 0.2304403102132095 | 0.4697191640675056 | 0.7360105824698187 | T | T | T |
| 0.3557842878960523 | 0.6662753127200428 | 0.7286640184810553 | T | T | T |
| 0.3013775306107851 | 0.6677453993197676 | 0.9060219239157403 | T | T | T |
| 0.1921991824818431 | 0.6465965974730000 | 0.0131039480585157 | T | T | T |
| 0.0904033996314939 | 0.6744016509499098 | 0.8926212086497697 | T | T | T |
| 0.1017602892241482 | 0.6549372849787587 | 0.6971828056566923 | T | T | T |
| 0.2277621209953968 | 0.6359247115323270 | 0.7469423708167371 | T | T | T |
| 0.3201170648713094 | 0.5511646854032789 | 0.8142074643456582 | T | T | T |
| 0.0831393357288797 | 0.5514140963538701 | 0.8209076255580532 | T | T | T |
| 0.4319865051159448 | 0.3744447906068872 | 0.5803062471330706 | T | T | T |
| 0.4177527256628358 | 0.5050983646163443 | 0.5569942414355291 | T | T | T |
| 0.4119775350638342 | 0.6379145959049612 | 0.5547887737771943 | T | T | T |
| 0.1935786850193895 | 0.3727004912061799 | 0.6075661106749775 | T | T | T |
| 0.1892871894452822 | 0.5000821204628220 | 0.5500149710465092 | T | T | T |

**Structure files (CONTCAR) involved in this work:**

|                    |                    |                    |   |   |   |
|--------------------|--------------------|--------------------|---|---|---|
| 0.1909019721900926 | 0.6344357619269375 | 0.5544906957971992 | T | T | T |
| 0.9959167495293880 | 0.4529686239551777 | 0.7831186297038782 | T | T | T |
| 0.9845047402227469 | 0.6359726013626108 | 0.7844325165552836 | T | T | T |
| 0.1445781391190923 | 0.5594775840105238 | 0.2075753640126028 | T | T | T |
| 0.2033348842541067 | 0.5701083618166088 | 0.3843064201360450 | T | T | T |
| 0.3021404620757954 | 0.5655229037941211 | 0.5217021504357926 | T | T | T |
| 0.3996057139864305 | 0.5706718700720502 | 0.3869215985101976 | T | T | T |
| 0.4018287740427107 | 0.5553285977027369 | 0.1915520445449948 | T | T | T |
| 0.2737013543098175 | 0.5324937236248610 | 0.2273127943115801 | T | T | T |
| 0.1418606481175378 | 0.3304490046549670 | 0.2387211955882883 | T | T | T |
| 0.1952794035299055 | 0.3407695830687018 | 0.4151386466273319 | T | T | T |
| 0.3090132399513472 | 0.3542011850213886 | 0.5147406923686920 | T | T | T |
| 0.4111052626457706 | 0.3286186130560690 | 0.3949259539317646 | T | T | T |
| 0.3956467488395193 | 0.3388619587490912 | 0.1983299039113368 | T | T | T |
| 0.2712539613717797 | 0.3569200962446561 | 0.2529120766301006 | T | T | T |
| 0.1825963551907264 | 0.4499025471733962 | 0.3039140321144247 | T | T | T |
| 0.4112936917051244 | 0.4485261939904743 | 0.3108027836779003 | T | T | T |
| 0.0693932623233433 | 0.6224288288827465 | 0.0738960062242655 | T | T | T |
| 0.0858698559664535 | 0.4915096425707475 | 0.0562687316078178 | T | T | T |
| 0.1095180543631709 | 0.3594728632243828 | 0.0504355203444666 | T | T | T |
| 0.3112844347070448 | 0.6253975827685369 | 0.0943304073902630 | T | T | T |
| 0.3275852841533207 | 0.4949068041761910 | 0.0549801177588462 | T | T | T |
| 0.3041119929494510 | 0.3621315655482625 | 0.0584480071881631 | T | T | T |
| 0.5126209048076353 | 0.5336909213703472 | 0.2947893444178363 | T | T | T |
| 0.5127221782256559 | 0.3633747898905491 | 0.2777486567223759 | T | T | T |
| 0.4410356858336157 | 0.7506359003386274 | 0.6451023329566226 | T | T | T |
| 0.1930531246865187 | 0.7488822400015323 | 0.6519879713720820 | T | T | T |
| 0.2727590835171145 | 0.7488895062397205 | 0.0567319792549228 | T | T | T |
| 0.1083159822249286 | 0.7482937471192911 | 0.0532774994286067 | T | T | T |
| 0.0622088087438039 | 0.2501181553821981 | 0.1357820380918945 | T | T | T |
| 0.3040084599061649 | 0.2465657675195420 | 0.1515905249503576 | T | T | T |
| 0.2268363744934722 | 0.2514609965587655 | 0.5556455676651401 | T | T | T |
| 0.3900909048872497 | 0.2508048767370694 | 0.5522286984539193 | T | T | T |
| 0.5584563893719302 | 0.2515956862752067 | 0.3625128496056029 | T | T | T |
| 0.8114436819656411 | 0.2494926796846686 | 0.3708099353666418 | T | T | T |
| 0.7256162928044777 | 0.2526154648943064 | 0.9601034802886572 | T | T | T |
| 0.8899269540319950 | 0.2488226167392772 | 0.9485676410602824 | T | T | T |
| 0.9363269010772304 | 0.7483513553262153 | 0.8645684181483074 | T | T | T |
| 0.6868597177564334 | 0.7596006273652696 | 0.8635423449719331 | T | T | T |
| 0.7728511097717859 | 0.7500378001328812 | 0.4863561657419958 | T | T | T |
| 0.6042844705533242 | 0.7491005648122961 | 0.4569719203334677 | T | T | T |
| 0.8855077221369512 | 0.4213402036244497 | 0.6044016482681908 | T | T | T |
| 0.0143570838287473 | 0.5399736651774971 | 0.5177418802184132 | T | T | T |
| 0.9308250809122113 | 0.5477687981111493 | 0.5598053345826680 | T | T | T |
| 0.9464706575035935 | 0.5415384441291387 | 0.4302813942054321 | T | T | T |
| 0.9061542265301444 | 0.4159759255532579 | 0.4686524397232428 | T | T | T |
| 1.0000143754550754 | 0.4213279009947397 | 0.5513412868808031 | T | T | T |
| 0.9715355556860532 | 0.4222423365817654 | 0.4316110513964082 | T | T | T |
| 0.9629478423791824 | 0.5232257709843022 | 0.5038240795161386 | T | T | T |
| 0.9604035678967618 | 0.4458105492689368 | 0.5062816864834415 | T | T | T |

**Figure 5(c) TS3**

Si Al O Ga H C

1.00000000000000

**Structure files (CONTCAR) involved in this work:**

20.0219999999999985 0.0000000000000000 0.0000000000000000  
0.0000000000000000 19.8990000000000009 0.0000000000000000  
0.0000000000000000 0.0000000000000000 13.3829999999999991  
93 3 192 1 6 2

Selective dynamics

Direct

|                    |                    |                    |   |   |   |
|--------------------|--------------------|--------------------|---|---|---|
| 0.4235412953019688 | 0.0554374313707159 | 0.6469928850560820 | T | T | T |
| 0.3024589422935418 | 0.0256768579179423 | 0.7881163702197397 | T | T | T |
| 0.2805462283809210 | 0.0602116234110479 | 0.0108245609093420 | T | T | T |
| 0.1210734891052040 | 0.0638624489021175 | 0.0118605684811139 | T | T | T |
| 0.0687684563132427 | 0.0293406385617833 | 0.8003318906911567 | T | T | T |
| 0.1774330515067217 | 0.0544001491829222 | 0.6501843894718699 | T | T | T |
| 0.4200417898156378 | 0.8264124783544883 | 0.6692657799721409 | T | T | T |
| 0.3034649609111290 | 0.8676307281704609 | 0.8100920975949732 | T | T | T |
| 0.2687080031951671 | 0.8282509954067240 | 0.0308924156341055 | T | T | T |
| 0.1137855508764259 | 0.8264913360672861 | 0.0183773165946223 | T | T | T |
| 0.0640171578288315 | 0.8708301269061358 | 0.8044114320328105 | T | T | T |
| 0.1806899763682384 | 0.8282758837775759 | 0.6733184067894044 | T | T | T |
| 0.0750458838480555 | 0.9434833908218337 | 0.1488969056029385 | T | T | T |
| 0.1962527416904113 | 0.9727250809311274 | 0.2925031867091702 | T | T | T |
| 0.2176726254460297 | 0.9366003220904368 | 0.5124965145155750 | T | T | T |
| 0.3769935661790691 | 0.9327288244987855 | 0.5143171202785317 | T | T | T |
| 0.4306716391619954 | 0.9704070202871578 | 0.3051028845140444 | T | T | T |
| 0.3214091519073095 | 0.9455478142210542 | 0.1544569471174823 | T | T | T |
| 0.0789453932112776 | 0.1723897744941649 | 0.1653840133392916 | T | T | T |
| 0.1960347433017164 | 0.1297676595681424 | 0.3084527211546674 | T | T | T |
| 0.2320145575326664 | 0.1724965335596220 | 0.5258017888910002 | T | T | T |
| 0.3867722801269246 | 0.1732904913248446 | 0.5135077358011471 | T | T | T |
| 0.4359869710589581 | 0.1278910202984506 | 0.3032004415709524 | T | T | T |
| 0.3186373188461228 | 0.1667011671041385 | 0.1705384486789013 | T | T | T |
| 0.5842803781654079 | 0.5525004002062823 | 0.3525546251376182 | T | T | T |
| 0.6935348090219358 | 0.5305100500350568 | 0.1885225393804068 | T | T | T |
| 0.7201930189116827 | 0.5664266861083407 | 0.9750349944398116 | T | T | T |
| 0.8774577858382162 | 0.5668145785561585 | 0.9924284716040128 | T | T | T |
| 0.9335755297858588 | 0.5301765649258242 | 0.1958646469428534 | T | T | T |
| 0.5763760015186158 | 0.3293637127541594 | 0.3343099176313914 | T | T | T |
| 0.6979329099437203 | 0.3763091185858778 | 0.2034392266377884 | T | T | T |
| 0.7327484974639571 | 0.3286708864738749 | 0.9896837149023503 | T | T | T |
| 0.8843805968394665 | 0.3270314127879130 | 0.9833731420283646 | T | T | T |
| 0.9361929318267030 | 0.3744031661040347 | 0.1913085860807920 | T | T | T |
| 0.9333454439428102 | 0.4463667500235277 | 0.8630349973792948 | T | T | T |
| 0.7847279620930203 | 0.4389837068006599 | 0.4957618925752063 | T | T | T |
| 0.6277183807704187 | 0.4283028657949266 | 0.4939368549478766 | T | T | T |
| 0.5697618566706381 | 0.4702111208579436 | 0.7049343647453181 | T | T | T |
| 0.6748637958886793 | 0.4373155471397702 | 0.8552617302116137 | T | T | T |
| 0.9214660053451160 | 0.6720899581785333 | 0.8331064032828903 | T | T | T |
| 0.8014131813126989 | 0.6373943444296378 | 0.6928658055164779 | T | T | T |
| 0.7717219825271756 | 0.6710348036377776 | 0.4724209291132712 | T | T | T |
| 0.6162420398654461 | 0.6708031627201163 | 0.4875507193849327 | T | T | T |
| 0.5694664919834385 | 0.6282961671922660 | 0.7047694247662124 | T | T | T |
| 0.6867075125829909 | 0.6832489420471703 | 0.8259943702854420 | T | T | T |
| 0.5755121078368074 | 0.9434947277930027 | 0.3628403053288345 | T | T | T |
| 0.6947270586946843 | 0.9747194411773302 | 0.2200591003851423 | T | T | T |

**Structure files (CONTCAR) involved in this work:**

|                    |                    |                    |   |   |   |
|--------------------|--------------------|--------------------|---|---|---|
| 0.7183531514269582 | 0.9431663627426611 | 0.9983127959914250 | T | T | T |
| 0.8780563711552858 | 0.9333541112510111 | 0.9936373661303868 | T | T | T |
| 0.9298990287185278 | 0.9711667756567153 | 0.2034130117934521 | T | T | T |
| 0.8202650033768637 | 0.9474859302740134 | 0.3558122212887746 | T | T | T |
| 0.5794283174040007 | 0.1743638211523011 | 0.3345258077596253 | T | T | T |
| 0.6959158783232327 | 0.1301893847195967 | 0.1969626829623583 | T | T | T |
| 0.7309359928185499 | 0.1728696937775495 | 0.9764878022800313 | T | T | T |
| 0.8853745991927441 | 0.1739098610098949 | 0.9904152362022045 | T | T | T |
| 0.9333980841691533 | 0.1288600961592853 | 0.2014379081190266 | T | T | T |
| 0.8173570788159678 | 0.1688042731048693 | 0.3336236846210576 | T | T | T |
| 0.9241959927475016 | 0.0567272854548769 | 0.8610013405662196 | T | T | T |
| 0.8040321634479564 | 0.0295995414217577 | 0.7198452398796912 | T | T | T |
| 0.7808292159028397 | 0.0636501748967838 | 0.4967923223473096 | T | T | T |
| 0.6210482375877199 | 0.0678749335986983 | 0.4934394808667566 | T | T | T |
| 0.5687465980713614 | 0.0309779140224842 | 0.7019488715521393 | T | T | T |
| 0.6778809690755796 | 0.0573508352306716 | 0.8547435803900519 | T | T | T |
| 0.9197419710951128 | 0.8261466479293980 | 0.8383164398510066 | T | T | T |
| 0.8029782335232831 | 0.8729073343193618 | 0.7017692526999563 | T | T | T |
| 0.7670671597280719 | 0.8312051495728084 | 0.4823249796075766 | T | T | T |
| 0.6124872660306450 | 0.8249683215038450 | 0.4925552048610052 | T | T | T |
| 0.5629170492996933 | 0.8743561236024268 | 0.6998255571580584 | T | T | T |
| 0.6778806191727798 | 0.8378015901027075 | 0.8374874140992193 | T | T | T |
| 0.4249702542761299 | 0.4450797754371261 | 0.6449964835139518 | T | T | T |
| 0.3047407223685447 | 0.4738413556130155 | 0.7912261345629434 | T | T | T |
| 0.2894333418899404 | 0.4335829029904646 | 0.0113570775582872 | T | T | T |
| 0.1329568110973445 | 0.4332855311471082 | 0.0126897832057977 | T | T | T |
| 0.0822029577142429 | 0.4741697158269910 | 0.8064780636625813 | T | T | T |
| 0.1824282986477088 | 0.4491070811940999 | 0.6464975087394812 | T | T | T |
| 0.4268073035808748 | 0.6715651843739652 | 0.6667851705804025 | T | T | T |
| 0.3028755506131812 | 0.6305916774535149 | 0.8015950047081555 | T | T | T |
| 0.2713916977779405 | 0.6723932885273635 | 0.0210104824517137 | T | T | T |
| 0.1177164246075040 | 0.6738174620535308 | 0.0137669471975797 | T | T | T |
| 0.0693366576021531 | 0.6304389321370160 | 0.8050197868620190 | T | T | T |
| 0.1801563266112493 | 0.6699461417364023 | 0.6639540646706884 | T | T | T |
| 0.0803393975062047 | 0.5546371170374499 | 0.1418363111962827 | T | T | T |
| 0.2033774146388047 | 0.5283907483517637 | 0.2825158318431670 | T | T | T |
| 0.2226706907969788 | 0.5671358629951915 | 0.5059667757143352 | T | T | T |
| 0.3819670164945069 | 0.5681093214069106 | 0.5100832940876785 | T | T | T |
| 0.4317622255044753 | 0.5266158189662504 | 0.3027150419070136 | T | T | T |
| 0.3312164889790271 | 0.5529506678529246 | 0.1433904080069421 | T | T | T |
| 0.0825926098526353 | 0.3273913137669121 | 0.1601548873848249 | T | T | T |
| 0.1986233773144937 | 0.3701396918800955 | 0.3045578153746903 | T | T | T |
| 0.2329717476804244 | 0.3292277097687047 | 0.5265821877490017 | T | T | T |
| 0.3870369986858441 | 0.3265781204668385 | 0.5185438426215573 | T | T | T |
| 0.4314388506479242 | 0.3709041840758975 | 0.3031622452584660 | T | T | T |
| 0.3200735141357577 | 0.3248162303588973 | 0.1672728456086500 | T | T | T |
| 0.8212084558148074 | 0.3303041863612715 | 0.3276947189773586 | T | T | T |
| 0.7984001113272501 | 0.4750396274248104 | 0.7278856326100365 | T | T | T |
| 0.8148145104345476 | 0.5583369654413217 | 0.3335540264139406 | T | T | T |
| 0.3580791593131684 | 0.0611321335461577 | 0.7178787957567008 | T | T | T |
| 0.3000606145066108 | 0.0656471376600443 | 0.8936819250049105 | T | T | T |
| 0.2005218327199481 | 0.0508010155584712 | 0.0260329197630741 | T | T | T |
| 0.1019221767153242 | 0.0686183156148972 | 0.8946189516162092 | T | T | T |

**Structure files (CONTCAR) involved in this work:**

|                    |                    |                    |   |   |   |
|--------------------|--------------------|--------------------|---|---|---|
| 0.1028279675331286 | 0.0555478979667603 | 0.6973842212229870 | T | T | T |
| 0.2294666818274420 | 0.0299121110507751 | 0.7359210848348069 | T | T | T |
| 0.3590502256880225 | 0.8252532868011657 | 0.7490710065940882 | T | T | T |
| 0.3052759758112809 | 0.8425230026702967 | 0.9249827106252237 | T | T | T |
| 0.1910072314224321 | 0.8522609710592401 | 0.0224447837350079 | T | T | T |
| 0.0864328972563023 | 0.8308610972426951 | 0.9047242084678701 | T | T | T |
| 0.1036049303559849 | 0.8389419654281084 | 0.7089571264770848 | T | T | T |
| 0.2296927691263007 | 0.8541254120729729 | 0.7626218224543353 | T | T | T |
| 0.3215617946491534 | 0.9471123152503698 | 0.8047026026514845 | T | T | T |
| 0.0830247782679414 | 0.9496147490520200 | 0.8156723528199398 | T | T | T |
| 0.4316846332212866 | 0.1245421701883022 | 0.5832829885158280 | T | T | T |
| 0.4177338093469339 | 0.9928048306614787 | 0.5693379271650618 | T | T | T |
| 0.3955830138094357 | 0.8612078606242262 | 0.5655513618656041 | T | T | T |
| 0.1948623727330722 | 0.1297193498183695 | 0.6122272566177756 | T | T | T |
| 0.1792631228304088 | 0.0022338843882919 | 0.5566693845154189 | T | T | T |
| 0.1944160244381549 | 0.8687718935824787 | 0.5701490404686878 | T | T | T |
| 0.9895864304932479 | 0.0451510796221455 | 0.7914379160674117 | T | T | T |
| 0.9840623278101174 | 0.8630518578386701 | 0.7872457907567858 | T | T | T |
| 0.1404456182993294 | 0.9401727612540418 | 0.2198739138720092 | T | T | T |
| 0.1983477919413269 | 0.9291978789962008 | 0.3952430644562908 | T | T | T |
| 0.2975776404701179 | 0.9475575362452195 | 0.5265473384969040 | T | T | T |
| 0.3976402424989863 | 0.9286865618927291 | 0.3974134002815620 | T | T | T |
| 0.3960995731705197 | 0.9474487289526069 | 0.2008613414653665 | T | T | T |
| 0.2691145421537101 | 0.9705594788932118 | 0.2396595571317995 | T | T | T |
| 0.1405806708488520 | 0.1694221249679163 | 0.2435340124789683 | T | T | T |
| 0.1950615184256178 | 0.1625132943551094 | 0.4191437621638420 | T | T | T |
| 0.3092988181816598 | 0.1479633779866332 | 0.5163761778823938 | T | T | T |
| 0.4135599295796991 | 0.1725454781376368 | 0.3992676426177296 | T | T | T |
| 0.3955974309288063 | 0.1541577923487558 | 0.2049263894949117 | T | T | T |
| 0.2695800307666959 | 0.1384674134810413 | 0.2583029162498699 | T | T | T |
| 0.1771764920040831 | 0.0505736794672940 | 0.3157316873421356 | T | T | T |
| 0.4175179750455992 | 0.0499070960833090 | 0.3255057676549024 | T | T | T |
| 0.0675904014523427 | 0.8718764626814821 | 0.0914071933966833 | T | T | T |
| 0.0810598256110593 | 0.0025402174534794 | 0.0651231470731010 | T | T | T |
| 0.0994919273618244 | 0.1345702907981926 | 0.0624978208268052 | T | T | T |
| 0.3050788989815676 | 0.8691763297554498 | 0.1201135473044779 | T | T | T |
| 0.3179513782688100 | 0.9949639459751868 | 0.0578132909551701 | T | T | T |
| 0.3046187333293873 | 0.1287768359517358 | 0.0654053780573057 | T | T | T |
| 0.5097439592664122 | 0.9550436984367547 | 0.2940664456970550 | T | T | T |
| 0.5156738525793387 | 0.1360771369109366 | 0.2838213336312343 | T | T | T |
| 0.6372414852545994 | 0.5624710665512233 | 0.2632360494425957 | T | T | T |
| 0.6862327967693976 | 0.5726536251167293 | 0.0841644672981228 | T | T | T |
| 0.7994429007282020 | 0.5462543911865922 | 0.9847429032303758 | T | T | T |
| 0.9031128914185540 | 0.5768448980372733 | 0.1068443139738333 | T | T | T |
| 0.9015093077688211 | 0.5471706947273889 | 0.3044861405467648 | T | T | T |
| 0.7678658747683593 | 0.5379295125796094 | 0.2304232304522300 | T | T | T |
| 0.6351538232895699 | 0.3367333704104167 | 0.2533391238090088 | T | T | T |
| 0.7202710879528246 | 0.3298795589445440 | 0.1087569804508898 | T | T | T |
| 0.8088893894093396 | 0.3555242196819756 | 0.9663668425661331 | T | T | T |
| 0.9061722783218822 | 0.3297852854484375 | 0.0996818172220165 | T | T | T |
| 0.9027632327337487 | 0.3504223239608910 | 0.2942046983691422 | T | T | T |
| 0.7592307150043580 | 0.3802990078361068 | 0.2806261208592456 | T | T | T |
| 0.6749033740137595 | 0.4511330365351042 | 0.1675909916423927 | T | T | T |

**Structure files (CONTCAR) involved in this work:**

|                    |                    |                    |   |   |   |
|--------------------|--------------------|--------------------|---|---|---|
| 0.9204090795004788 | 0.4526503970219518 | 0.1644266947373879 | T | T | T |
| 0.5732521926398431 | 0.6224351897149524 | 0.4134303027620932 | T | T | T |
| 0.6121199679561258 | 0.4952701510385042 | 0.4293839611227842 | T | T | T |
| 0.5959973997544759 | 0.3626668090553706 | 0.4412328161216705 | T | T | T |
| 0.8052559946925066 | 0.6395043413754324 | 0.3754369427990518 | T | T | T |
| 0.8008267549640290 | 0.5029257765108883 | 0.4319873170267527 | T | T | T |
| 0.8285466408857496 | 0.3695818937870524 | 0.4545380612081890 | T | T | T |
| 0.0140552363821070 | 0.5437567338246924 | 0.2102155026846280 | T | T | T |
| 0.0172361642897706 | 0.3674164941152332 | 0.1991599452379640 | T | T | T |
| 0.8803970981558256 | 0.4481712000996021 | 0.7688343218729905 | T | T | T |
| 0.8202611065971910 | 0.4453715749472700 | 0.6060874116797084 | T | T | T |
| 0.7082268633138253 | 0.4162600523275565 | 0.5047794573291033 | T | T | T |
| 0.5967808890853348 | 0.4336740294155837 | 0.6046939754236297 | T | T | T |
| 0.6013097588837548 | 0.4352563917510879 | 0.8032397958228171 | T | T | T |
| 0.7332554053589987 | 0.4300049384741181 | 0.7733796739492439 | T | T | T |
| 0.8677711415625413 | 0.6706511604701357 | 0.7437140114014663 | T | T | T |
| 0.8111871749164109 | 0.6465560811128754 | 0.5733958251496134 | T | T | T |
| 0.6936322086975742 | 0.6473446025825299 | 0.4856409134118250 | T | T | T |
| 0.5869480418988903 | 0.6650480239795713 | 0.6002092441264426 | T | T | T |
| 0.6104227131203975 | 0.6627193761927735 | 0.7961135963687744 | T | T | T |
| 0.7345446308904184 | 0.6785963878238527 | 0.7275478939178116 | T | T | T |
| 0.7947210522292307 | 0.5605009313379128 | 0.7279703691772575 | T | T | T |
| 0.5894729206051822 | 0.5493189062179086 | 0.6987007173782411 | T | T | T |
| 0.9344408106062241 | 0.3734657261584400 | 0.9162130020267243 | T | T | T |
| 0.9211120731186978 | 0.5060128894436928 | 0.9418010990955276 | T | T | T |
| 0.8929674665577065 | 0.6359544013397339 | 0.9331240558182649 | T | T | T |
| 0.6782003493738074 | 0.3751463583161502 | 0.9339508610054348 | T | T | T |
| 0.6814336011141593 | 0.5087550024526675 | 0.9131021726880212 | T | T | T |
| 0.7145288044993712 | 0.6375302342710258 | 0.9168905584057876 | T | T | T |
| 0.4893537485569183 | 0.4614817213772267 | 0.7130496836008157 | T | T | T |
| 0.4893873684981616 | 0.6368524291860642 | 0.7249733494067765 | T | T | T |
| 0.6406475312007018 | 0.9378725182297989 | 0.2914513915945633 | T | T | T |
| 0.6987055635718424 | 0.9346125463001331 | 0.1148391797920691 | T | T | T |
| 0.7987781867800926 | 0.9481051201927143 | 0.9828956372819697 | T | T | T |
| 0.8993856840739386 | 0.9285422254687498 | 0.1102469026064907 | T | T | T |
| 0.8946542175263462 | 0.9485909673808396 | 0.3071807326933529 | T | T | T |
| 0.7680423477528799 | 0.9735512608026369 | 0.2713867387393938 | T | T | T |
| 0.6417491847863329 | 0.1747978293543655 | 0.2576258017139900 | T | T | T |
| 0.6958631010615420 | 0.1566223975415449 | 0.0827029845624311 | T | T | T |
| 0.8085813886790136 | 0.1477127476815480 | 0.9812339219665580 | T | T | T |
| 0.9087026928737882 | 0.1735749499090893 | 0.1065175302496714 | T | T | T |
| 0.8950363055856742 | 0.1533470147459935 | 0.3017204492133258 | T | T | T |
| 0.7697758497654457 | 0.1364917375079783 | 0.2462382794192374 | T | T | T |
| 0.6720992029369963 | 0.0520413140224688 | 0.2011210685180205 | T | T | T |
| 0.9174063265862834 | 0.0502452737339464 | 0.1792928508382704 | T | T | T |
| 0.5660526070128189 | 0.8732980216579498 | 0.4234332648665181 | T | T | T |
| 0.5815016744956569 | 0.0054920038866557 | 0.4417781657916247 | T | T | T |
| 0.6006118305750227 | 0.1377402577847317 | 0.4385674496452681 | T | T | T |
| 0.8027674114982277 | 0.8716250674598636 | 0.3912379917975801 | T | T | T |
| 0.8184458810914170 | 0.9978902684499488 | 0.4514160937090615 | T | T | T |
| 0.8037589759374911 | 0.1318388408407600 | 0.4405764448394314 | T | T | T |
| 0.0092895717396866 | 0.9561198892758250 | 0.2167184242573687 | T | T | T |
| 0.0135976939730993 | 0.1386570772420561 | 0.2169970588511635 | T | T | T |

**Structure files (CONTCAR) involved in this work:**

|                    |                    |                    |   |   |   |
|--------------------|--------------------|--------------------|---|---|---|
| 0.8590956270636840 | 0.0660607903902263 | 0.7903097240259379 | T | T | T |
| 0.8013295020948384 | 0.0691279843062933 | 0.6139275433857273 | T | T | T |
| 0.7005790748743672 | 0.0537650089982515 | 0.4837624199784192 | T | T | T |
| 0.5997870825719243 | 0.0747525294303141 | 0.6102339668072936 | T | T | T |
| 0.6035107123860759 | 0.0513589967977926 | 0.8073047630208970 | T | T | T |
| 0.7305229682552791 | 0.0322580352313493 | 0.7703844157216145 | T | T | T |
| 0.8574174494191840 | 0.8277823921543099 | 0.7613273752131233 | T | T | T |
| 0.8037886945740224 | 0.8502288807251899 | 0.5863642928258164 | T | T | T |
| 0.6887427218204212 | 0.8532649927291225 | 0.4887141759660429 | T | T | T |
| 0.5857340027540303 | 0.8269538565889477 | 0.6071901703633232 | T | T | T |
| 0.6014954706396011 | 0.8505046870638764 | 0.8003805907886186 | T | T | T |
| 0.7290028123744653 | 0.8624336030287224 | 0.7498007720716238 | T | T | T |
| 0.8254338221854194 | 0.9513247651729974 | 0.7078508450794653 | T | T | T |
| 0.5813369163583313 | 0.9521559878508048 | 0.6755756240635024 | T | T | T |
| 0.9340623786682055 | 0.1254064735545973 | 0.9254094406077725 | T | T | T |
| 0.9179598766002722 | 0.9937313443146524 | 0.9377255902273367 | T | T | T |
| 0.8985316823473869 | 0.8622250321384243 | 0.9425319921220043 | T | T | T |
| 0.6922052432160433 | 0.1346833301445928 | 0.8862967411293087 | T | T | T |
| 0.6840462225023655 | 0.0112411741887231 | 0.9547111095939937 | T | T | T |
| 0.6901911333111187 | 0.8782368969346092 | 0.9402627555246224 | T | T | T |
| 0.4894337829094516 | 0.0459008277070179 | 0.7156921897203219 | T | T | T |
| 0.4827675045902517 | 0.8669701959718688 | 0.7176463514486113 | T | T | T |
| 0.3604981480570365 | 0.4429517815389275 | 0.7177388950196663 | T | T | T |
| 0.3016580582305090 | 0.4285592839016170 | 0.8918316222866639 | T | T | T |
| 0.2109375893566446 | 0.4490237034571978 | 0.0357130443663342 | T | T | T |
| 0.1204422813404191 | 0.4316178647709588 | 0.8924136635060202 | T | T | T |
| 0.1073704812605524 | 0.4545144443699745 | 0.6941939314447239 | T | T | T |
| 0.2332016393323861 | 0.4710250105109816 | 0.7342458279614382 | T | T | T |
| 0.3605313177678763 | 0.6650873860350353 | 0.7353817267127167 | T | T | T |
| 0.3001635503859497 | 0.6692334776841717 | 0.9078411776970324 | T | T | T |
| 0.1941451661721958 | 0.6460449201861630 | 0.0220069293811751 | T | T | T |
| 0.0950183204163233 | 0.6763528695848257 | 0.8972573738638416 | T | T | T |
| 0.1035692786661758 | 0.6565262904671075 | 0.7015018186196340 | T | T | T |
| 0.2309238553305387 | 0.6370686152291239 | 0.7454801479924982 | T | T | T |
| 0.3197192942239528 | 0.5516050309373772 | 0.8201378735363200 | T | T | T |
| 0.0927455550179964 | 0.5534940889343700 | 0.8275130443178964 | T | T | T |
| 0.4337700527058399 | 0.3726794368883715 | 0.5901189157237628 | T | T | T |
| 0.4164692582047865 | 0.5018320191070725 | 0.5584344038794887 | T | T | T |
| 0.4131429912073463 | 0.6353483659583170 | 0.5596807734370708 | T | T | T |
| 0.1924195220823162 | 0.3723134949665484 | 0.6101094924811495 | T | T | T |
| 0.1870027298203756 | 0.4995341577820802 | 0.5509127218456067 | T | T | T |
| 0.1895462100090587 | 0.6337326401798652 | 0.5557499593392796 | T | T | T |
| 0.0034651336633206 | 0.4555096358024123 | 0.8035833175965378 | T | T | T |
| 0.9887955168162889 | 0.6333379830735589 | 0.7935792334956007 | T | T | T |
| 0.1439740292879188 | 0.5617594798343151 | 0.2163109632425396 | T | T | T |
| 0.2079580843119611 | 0.5697748538449291 | 0.3870458097938028 | T | T | T |
| 0.3018212278987287 | 0.5645972379563227 | 0.5310997958797087 | T | T | T |
| 0.3967466712735586 | 0.5702271557943528 | 0.3914365149147845 | T | T | T |
| 0.4039247547697645 | 0.5564156287346995 | 0.1971074981593358 | T | T | T |
| 0.2742176281071885 | 0.5333664962669803 | 0.2253828316975570 | T | T | T |
| 0.1389410570325067 | 0.3314685653105295 | 0.2470616331322552 | T | T | T |
| 0.1994110510532207 | 0.3418943675010847 | 0.4179327385177881 | T | T | T |
| 0.3102750316865541 | 0.3541476410386977 | 0.5260966099727439 | T | T | T |

**Structure files (CONTCAR) involved in this work:**

|                    |                    |                    |   |   |   |
|--------------------|--------------------|--------------------|---|---|---|
| 0.4101099552878337 | 0.3300247718850527 | 0.4030143939139840 | T | T | T |
| 0.3959099265318197 | 0.3362753734428435 | 0.2066271946342249 | T | T | T |
| 0.2697295507835840 | 0.3565013740118667 | 0.2506158816979847 | T | T | T |
| 0.1838240869910662 | 0.4505982529065339 | 0.3059205164764838 | T | T | T |
| 0.4075722457759202 | 0.4486930515882394 | 0.3139921996029981 | T | T | T |
| 0.0704738114349148 | 0.6233004966880125 | 0.0777440126454623 | T | T | T |
| 0.0883071793788412 | 0.4920586141595631 | 0.0643516575622883 | T | T | T |
| 0.1112518743439947 | 0.3607740489082855 | 0.0573147870534264 | T | T | T |
| 0.3155759329276724 | 0.6258002487515101 | 0.0946941607068735 | T | T | T |
| 0.3331667369714511 | 0.4950409072257069 | 0.0573244321407115 | T | T | T |
| 0.3101579281668731 | 0.3619798736079582 | 0.0601304461746725 | T | T | T |
| 0.5121948012315347 | 0.5305760699671463 | 0.3068746562706186 | T | T | T |
| 0.5112908089983588 | 0.3670711479180370 | 0.2878260998279555 | T | T | T |
| 0.4418616434322936 | 0.7499316338221999 | 0.6443099697765068 | T | T | T |
| 0.1942786790040654 | 0.7493230913310081 | 0.6505484931811417 | T | T | T |
| 0.2743888855688546 | 0.7493074618333808 | 0.0599400628662762 | T | T | T |
| 0.1104080952447346 | 0.7492285657000468 | 0.0578566157621462 | T | T | T |
| 0.0638233570867448 | 0.2500778762597631 | 0.1367489565948587 | T | T | T |
| 0.3045588865388014 | 0.2458766742395674 | 0.1518217748359607 | T | T | T |
| 0.2274115016043040 | 0.2509989105321430 | 0.5577363363863372 | T | T | T |
| 0.3916249883493531 | 0.2494197710884383 | 0.5566471680270925 | T | T | T |
| 0.5588517199072189 | 0.2514110024445193 | 0.3578622877591031 | T | T | T |
| 0.8039192493295541 | 0.2474340940156070 | 0.3450299192646312 | T | T | T |
| 0.7266429024075897 | 0.2520049358065046 | 0.9500853086553906 | T | T | T |
| 0.8912797446280312 | 0.2498301201461135 | 0.9458764369159363 | T | T | T |
| 0.9398884800072977 | 0.7488609309953834 | 0.8626178573666785 | T | T | T |
| 0.6883117789779062 | 0.7598142568683875 | 0.8656754428066062 | T | T | T |
| 0.7740845168360861 | 0.7522326998780097 | 0.4626577051226312 | T | T | T |
| 0.6079433593217147 | 0.7484720541049474 | 0.4512240382003196 | T | T | T |
| 0.9216119251531019 | 0.4338543337927124 | 0.6285984116230330 | T | T | T |
| 0.0388549112728947 | 0.4838842683585016 | 0.5626726823917191 | T | T | T |
| 0.8769474863984470 | 0.3759617582868739 | 0.4611810766865139 | T | T | T |
| 0.0274006873269737 | 0.4494516226976473 | 0.4351098511766169 | T | T | T |
| 0.0253539800200423 | 0.5655768248254397 | 0.3799395463188571 | T | T | T |
| 0.9940918293041507 | 0.5953151798121185 | 0.5030905424091671 | T | T | T |
| 0.9503232668373126 | 0.5489867765292463 | 0.3940082502530746 | T | T | T |
| 0.0203272925150053 | 0.4916048199286949 | 0.4868707457270718 | T | T | T |
| 0.9980867413730142 | 0.5534447735916834 | 0.4505334256481044 | T | T | T |

**Figure 7(a) ①**

Si O Al Zn C H

1.0000000000000000

20.0219999999999985 0.0000000000000000 0.0000000000000000

0.0000000000000000 19.8990000000000009 0.0000000000000000

0.0000000000000000 0.0000000000000000 13.3829999999999991

93 194 3 2 2 8

Selective dynamics

Direct

0.4229895333669044 0.0598578222190368 0.6483589071279581 T T T

0.3056756877159781 0.0317690970281843 0.7922157090329456 T T T

0.2829479608427121 0.0556946078383812 0.0170793941906004 T T T

0.1239937795494480 0.0621469703191157 0.0122483486412374 T T T

0.0682021600700912 0.0310237266111110 0.8013696391344726 T T T



**Structure files (CONTCAR) involved in this work:**

|                    |                    |                    |   |   |   |
|--------------------|--------------------|--------------------|---|---|---|
| 0.1809222379907953 | 0.0644684492929312 | 0.6653309872984089 | T | T | T |
| 0.4192469781254792 | 0.8269962591559318 | 0.6689599523969082 | T | T | T |
| 0.3012841805033724 | 0.8728090008765468 | 0.8004194503923154 | T | T | T |
| 0.2675994114471266 | 0.8307676660538830 | 0.0198154063107731 | T | T | T |
| 0.1118547692193055 | 0.8270548190932728 | 0.0129539449824069 | T | T | T |
| 0.0661047031998504 | 0.8740642527025868 | 0.7989467806950713 | T | T | T |
| 0.1792813473565433 | 0.8283727389018769 | 0.6649058883218573 | T | T | T |
| 0.0761450614834507 | 0.9409531905025673 | 0.1495163088624790 | T | T | T |
| 0.1953217851728209 | 0.9695369701603623 | 0.2907334253733050 | T | T | T |
| 0.2171603810610050 | 0.9431458216157010 | 0.5165491345052583 | T | T | T |
| 0.3775368937626946 | 0.9349828754432772 | 0.5140450132560146 | T | T | T |
| 0.4338625886279458 | 0.9684244694575619 | 0.3018553861649701 | T | T | T |
| 0.3209208323607295 | 0.9352172302178474 | 0.1648448006721812 | T | T | T |
| 0.0830019634144595 | 0.1715806264668985 | 0.1662187607472573 | T | T | T |
| 0.1984408369071068 | 0.1281888358925229 | 0.3018811254339415 | T | T | T |
| 0.2320249948103819 | 0.1690259371952706 | 0.5191041659174480 | T | T | T |
| 0.3875802665825491 | 0.1734150141269470 | 0.5083657115246480 | T | T | T |
| 0.4352106137494769 | 0.1266179246918322 | 0.2948697926591325 | T | T | T |
| 0.3186995562222226 | 0.1720160299713188 | 0.1660875573107772 | T | T | T |
| 0.5772320115587474 | 0.5547122332697637 | 0.3604934013046815 | T | T | T |
| 0.6905472011944492 | 0.5260230740651460 | 0.2056587760547406 | T | T | T |
| 0.7135248595880412 | 0.5679264831028734 | 0.9917841754624607 | T | T | T |
| 0.8728865891470005 | 0.5732149262996226 | 0.9870478336116633 | T | T | T |
| 0.8102580601649825 | 0.5504430212020224 | 0.3448103980606872 | T | T | T |
| 0.5731059789847162 | 0.3282815700135230 | 0.3320657980800034 | T | T | T |
| 0.6931797564199091 | 0.3722122276590810 | 0.1926689908387656 | T | T | T |
| 0.7302362411959519 | 0.3280321104338044 | 0.9797104506898795 | T | T | T |
| 0.8852140384798134 | 0.3263880161677911 | 0.9950121632093081 | T | T | T |
| 0.9420115141549946 | 0.3742357102635310 | 0.1928596027098866 | T | T | T |
| 0.9188770027867932 | 0.4457586292198374 | 0.8604579098905958 | T | T | T |
| 0.8006129810136563 | 0.4736984312919748 | 0.7186895992872337 | T | T | T |
| 0.7749146268950073 | 0.4370274135829125 | 0.4957687596098119 | T | T | T |
| 0.6176987322933701 | 0.4276900704615111 | 0.4917712654616653 | T | T | T |
| 0.5695585766745654 | 0.4684028264811039 | 0.7027737590031424 | T | T | T |
| 0.6771898941553564 | 0.4495114337302780 | 0.8578710812184155 | T | T | T |
| 0.9204712793369326 | 0.6779589347972118 | 0.8279663975392726 | T | T | T |
| 0.7679233409873865 | 0.6684823913458919 | 0.4632121236954432 | T | T | T |
| 0.6130422522377671 | 0.6735208838047261 | 0.4885110965943720 | T | T | T |
| 0.5620802024914113 | 0.6266093595781426 | 0.6987457939798617 | T | T | T |
| 0.6756761181592980 | 0.6732293926604046 | 0.8286113168502997 | T | T | T |
| 0.5784178487314120 | 0.9454771252742717 | 0.3585829291745204 | T | T | T |
| 0.6985228427257744 | 0.9736972026188176 | 0.2144521845553417 | T | T | T |
| 0.7197181225616140 | 0.9377975021564370 | 0.9931873660501586 | T | T | T |
| 0.8796720194513373 | 0.9345938581996793 | 0.9950116446892429 | T | T | T |
| 0.9313994077695206 | 0.9704032364165917 | 0.2048726746841065 | T | T | T |
| 0.8221593057704446 | 0.9464459247872706 | 0.3546047890177491 | T | T | T |
| 0.5778855435296834 | 0.1732894312116914 | 0.3293241665322043 | T | T | T |
| 0.6983446555762736 | 0.1315736386565251 | 0.1936238942148979 | T | T | T |
| 0.7322974532561992 | 0.1720598064207174 | 0.9723003765124684 | T | T | T |
| 0.8871522637881869 | 0.1740806752238045 | 0.9828316315541507 | T | T | T |
| 0.9361677801825522 | 0.1282486258026627 | 0.1962718443935083 | T | T | T |
| 0.8210921406095084 | 0.1730453006366237 | 0.3302815770709610 | T | T | T |
| 0.9232583488437517 | 0.0545066340190171 | 0.8560288450295894 | T | T | T |

**Structure files (CONTCAR) involved in this work:**

|                    |                    |                    |   |   |   |
|--------------------|--------------------|--------------------|---|---|---|
| 0.8019732616306238 | 0.0257657038854117 | 0.7096293902273790 | T | T | T |
| 0.7814749251755722 | 0.0662544146829339 | 0.4916151219369715 | T | T | T |
| 0.6211157774656193 | 0.0702436774895322 | 0.4902735990855237 | T | T | T |
| 0.5684592889189702 | 0.0323423934648345 | 0.6992370527693311 | T | T | T |
| 0.6787084060748380 | 0.0537295973343503 | 0.8499462552763505 | T | T | T |
| 0.9230226548426559 | 0.8305535056593389 | 0.8369034019744747 | T | T | T |
| 0.8026804170480584 | 0.8682867760253176 | 0.6944250466460015 | T | T | T |
| 0.7695334177273190 | 0.8260307125329301 | 0.4770625649325468 | T | T | T |
| 0.6146420605478187 | 0.8268738991038614 | 0.4901710991462593 | T | T | T |
| 0.5639789632342165 | 0.8751451306414400 | 0.6982093816635562 | T | T | T |
| 0.6787309059934808 | 0.8325271663367306 | 0.8327768686180960 | T | T | T |
| 0.4232628349115982 | 0.4409839262879968 | 0.6482850138450630 | T | T | T |
| 0.3046623235696873 | 0.4686295404472010 | 0.7906248739686720 | T | T | T |
| 0.2792161673899784 | 0.4457733986830846 | 0.0175348527865488 | T | T | T |
| 0.1213887210104753 | 0.4377366000133109 | 0.0182000873833635 | T | T | T |
| 0.0644566531519634 | 0.4680362221134450 | 0.8046414445520454 | T | T | T |
| 0.1774137710494139 | 0.4353252996931579 | 0.6644623957915525 | T | T | T |
| 0.4169267823177950 | 0.6729517437676322 | 0.6685295503564492 | T | T | T |
| 0.3008152252125669 | 0.6272682191800307 | 0.8010618464392716 | T | T | T |
| 0.2683986108183547 | 0.6693126203478155 | 0.0212535246270612 | T | T | T |
| 0.1137814437935347 | 0.6733375258640554 | 0.0126451233851896 | T | T | T |
| 0.0659414802859687 | 0.6268108923540886 | 0.8001137419378337 | T | T | T |
| 0.1790327314370695 | 0.6707660262120645 | 0.6642774447755061 | T | T | T |
| 0.0780925585564259 | 0.5599557582561052 | 0.1505505573690809 | T | T | T |
| 0.1969927083641790 | 0.5283179137453137 | 0.2901393601474708 | T | T | T |
| 0.2148213541692296 | 0.5552249302835833 | 0.5168282672645459 | T | T | T |
| 0.3745112083621240 | 0.5648018706357711 | 0.5160285432999757 | T | T | T |
| 0.4312815341095956 | 0.5307370492770253 | 0.3051261193293852 | T | T | T |
| 0.3223439180873646 | 0.5639527012856360 | 0.1636992959413478 | T | T | T |
| 0.0860747232060938 | 0.3238276682333810 | 0.1644770073495837 | T | T | T |
| 0.1987597894947753 | 0.3702246486285050 | 0.3019137413803402 | T | T | T |
| 0.2306096881976337 | 0.3304451618259749 | 0.5198924432914429 | T | T | T |
| 0.3858007633877648 | 0.3275357677082590 | 0.5073795373119960 | T | T | T |
| 0.4314784040306674 | 0.3736343630112312 | 0.2934628701207281 | T | T | T |
| 0.3169496909673892 | 0.3291663859641624 | 0.1643565927995745 | T | T | T |
| 0.0115271974397981 | 0.5582939984834047 | 0.2299884146922594 | T | T | T |
| 0.3593272235865643 | 0.0704534505361719 | 0.7220504764537609 | T | T | T |
| 0.3176050317310756 | 0.0536104072774043 | 0.9074776865759078 | T | T | T |
| 0.2029974813936762 | 0.0450829125344854 | 0.0064758614506398 | T | T | T |
| 0.0930589583540772 | 0.0697708166481095 | 0.9012833951182453 | T | T | T |
| 0.1041748258460412 | 0.0638887497304314 | 0.7041706821050895 | T | T | T |
| 0.2300159375124115 | 0.0522700484253555 | 0.7606321493663701 | T | T | T |
| 0.3602001811370835 | 0.8277634591266713 | 0.7521222103595521 | T | T | T |
| 0.3013139516576119 | 0.8614649379944679 | 0.9199077320509944 | T | T | T |
| 0.1890669216333045 | 0.8516749093679465 | 0.0224401400812290 | T | T | T |
| 0.0881379019340701 | 0.8318069454595058 | 0.8975824858085607 | T | T | T |
| 0.1027054077719031 | 0.8409796825631326 | 0.7017891626685776 | T | T | T |
| 0.2291789411570635 | 0.8499025924186960 | 0.7555983460979895 | T | T | T |
| 0.3156493715238662 | 0.9513072539518800 | 0.7756310499563049 | T | T | T |
| 0.0889873048919051 | 0.9519597532794198 | 0.8108738628659016 | T | T | T |
| 0.4331750378976637 | 0.1270034912580599 | 0.5808418162355157 | T | T | T |
| 0.4124780334360296 | 0.9957838447131577 | 0.5751018283855072 | T | T | T |
| 0.3935158264205216 | 0.8636636096879757 | 0.5676336938963631 | T | T | T |

**Structure files (CONTCAR) involved in this work:**

|                    |                    |                    |   |   |   |
|--------------------|--------------------|--------------------|---|---|---|
| 0.1965103399323012 | 0.1376832531350940 | 0.6172973526759244 | T | T | T |
| 0.1904963822000766 | 0.0052318999590442 | 0.5835321656707115 | T | T | T |
| 0.1947020118141140 | 0.8716058060035349 | 0.5648430672965226 | T | T | T |
| 0.9882995718626033 | 0.0394830849120853 | 0.7869284419530199 | T | T | T |
| 0.9856627283626701 | 0.8698025048132459 | 0.7846604669232345 | T | T | T |
| 0.1405171605226615 | 0.9312413589814611 | 0.2219834774420633 | T | T | T |
| 0.1838170106260091 | 0.9487607264324486 | 0.4064175441615717 | T | T | T |
| 0.2976646384853671 | 0.9474692034571056 | 0.5091048091318552 | T | T | T |
| 0.4080103655032456 | 0.9313712056757277 | 0.4025164112962519 | T | T | T |
| 0.3970736223129401 | 0.9349688250869801 | 0.2057667438751878 | T | T | T |
| 0.2703794030437653 | 0.9475539016124026 | 0.2584572820895613 | T | T | T |
| 0.1393777171799479 | 0.1728712069295747 | 0.2532798207087525 | T | T | T |
| 0.1954108071362969 | 0.1376403678467611 | 0.4216944540695449 | T | T | T |
| 0.3103835196899921 | 0.1479754906417331 | 0.5160487599149172 | T | T | T |
| 0.4131227982628682 | 0.1682182117249773 | 0.3939250490204362 | T | T | T |
| 0.3958200156397455 | 0.1579353192076288 | 0.1987815474927172 | T | T | T |
| 0.2709636811747914 | 0.1528017372775445 | 0.2608489736746392 | T | T | T |
| 0.1860651735837045 | 0.0498735055169259 | 0.2730462924876049 | T | T | T |
| 0.4152378364361016 | 0.0479706074872893 | 0.3085278672120086 | T | T | T |
| 0.0651656287184748 | 0.8724030522157751 | 0.0851673548234033 | T | T | T |
| 0.0859355525201979 | 0.0023097334406959 | 0.0712516906989193 | T | T | T |
| 0.1119620003304306 | 0.1327740055240721 | 0.0690689441545291 | T | T | T |
| 0.3055579438757610 | 0.8621878884098400 | 0.1157694497123085 | T | T | T |
| 0.3130198138056026 | 0.9946078075003403 | 0.0829269863049157 | T | T | T |
| 0.2991374463163007 | 0.1277005859859964 | 0.0686101143963388 | T | T | T |
| 0.5134744535668009 | 0.9569772069326931 | 0.2878885365445859 | T | T | T |
| 0.5153175505368958 | 0.1333695509258441 | 0.2779010033203826 | T | T | T |
| 0.6404266974740448 | 0.5598586983805881 | 0.2861182382796452 | T | T | T |
| 0.6936543113949526 | 0.5751886979498865 | 0.1091080329788294 | T | T | T |
| 0.7933729125285222 | 0.5571328991280305 | 0.9774894566922474 | T | T | T |
| 0.8960669371698434 | 0.5817179933999099 | 0.1014175325237190 | T | T | T |
| 0.8873252948461094 | 0.5371781108369375 | 0.3148852952216175 | T | T | T |
| 0.7646314933310510 | 0.5217622773276387 | 0.2552584587376266 | T | T | T |
| 0.6393127428730192 | 0.3345803292935671 | 0.2646852373124834 | T | T | T |
| 0.6893520143015736 | 0.3358179200135508 | 0.0835030842041041 | T | T | T |
| 0.8077573559454749 | 0.3508881298992408 | 0.9955054785750928 | T | T | T |
| 0.9127791883181482 | 0.3221438322096037 | 0.1095416818886956 | T | T | T |
| 0.9052697689598537 | 0.3604966901308864 | 0.3009197789851261 | T | T | T |
| 0.7666256725662091 | 0.3680371555510489 | 0.2394033256372579 | T | T | T |
| 0.6679999675627439 | 0.4501426803306221 | 0.1777247550838995 | T | T | T |
| 0.9321800658687196 | 0.4498559759225065 | 0.1558012247753423 | T | T | T |
| 0.5674166625028207 | 0.6263534941904748 | 0.4167236331347690 | T | T | T |
| 0.5874068479474034 | 0.4963695915447600 | 0.4440449305333341 | T | T | T |
| 0.5825363353669729 | 0.3624730203647358 | 0.4418269082717970 | T | T | T |
| 0.7960426680179928 | 0.6301515274626450 | 0.3639388889245367 | T | T | T |
| 0.7933744110769583 | 0.5134308675279983 | 0.4531345250917339 | T | T | T |
| 0.8221676328135598 | 0.3825623413256276 | 0.4405566147266355 | T | T | T |
| 0.0213500747300630 | 0.3603028122913754 | 0.2111785967669441 | T | T | T |
| 0.8548647757214896 | 0.4342876264305011 | 0.7873359076729289 | T | T | T |
| 0.7863438201272397 | 0.4335400254840752 | 0.6152332056230853 | T | T | T |
| 0.6972208096517458 | 0.4232757515067409 | 0.4688371691305817 | T | T | T |
| 0.6031989457001834 | 0.4268822340805594 | 0.6107980809978067 | T | T | T |
| 0.6037828053214945 | 0.4453227775125203 | 0.8068290451833575 | T | T | T |

**Structure files (CONTCAR) involved in this work:**

|                    |                    |                    |   |   |   |
|--------------------|--------------------|--------------------|---|---|---|
| 0.7300936663526688 | 0.4797827567592233 | 0.7771423334655354 | T | T | T |
| 0.8689781857332824 | 0.6807176015220312 | 0.7360104744608489 | T | T | T |
| 0.8129569447395063 | 0.6438921918668806 | 0.5580974909787941 | T | T | T |
| 0.6903609798925346 | 0.6480716580498878 | 0.4845653461345573 | T | T | T |
| 0.5855568661135238 | 0.6695766203889602 | 0.6019061950883491 | T | T | T |
| 0.5980077339893146 | 0.6571676980602330 | 0.7974266714138737 | T | T | T |
| 0.7250257087552255 | 0.6500352957469887 | 0.7401381853456385 | T | T | T |
| 0.8283484475884814 | 0.5490575906092058 | 0.6919975433485328 | T | T | T |
| 0.5813061294219424 | 0.5480685976769142 | 0.6825712311601990 | T | T | T |
| 0.9290752089843131 | 0.3789088739673599 | 0.9289723113396503 | T | T | T |
| 0.9119275012711747 | 0.5116856797439253 | 0.9308130468763942 | T | T | T |
| 0.8901728640910075 | 0.6423738087219926 | 0.9268427054032597 | T | T | T |
| 0.6977259938933763 | 0.3744435170025482 | 0.8927885739788654 | T | T | T |
| 0.6745465658969175 | 0.5012858843703445 | 0.9513570058622441 | T | T | T |
| 0.6902683380841161 | 0.6352687005799268 | 0.9341342121758610 | T | T | T |
| 0.4904821349788300 | 0.4512758858697387 | 0.7133917854265055 | T | T | T |
| 0.4813394087463225 | 0.6328003282935533 | 0.7115253023577591 | T | T | T |
| 0.6440266242948915 | 0.9400023840476067 | 0.2885211850612986 | T | T | T |
| 0.6987789882736820 | 0.9323744691853475 | 0.1099276716731295 | T | T | T |
| 0.8001228797138503 | 0.9463481853052956 | 0.9809055926084701 | T | T | T |
| 0.8993348373604352 | 0.9283345749408514 | 0.1122308169380593 | T | T | T |
| 0.8975571830599719 | 0.9481219674993647 | 0.3098477280816995 | T | T | T |
| 0.7719117145764277 | 0.9681474544176955 | 0.2649908256331979 | T | T | T |
| 0.6410575283677494 | 0.1723498987961258 | 0.2540686509193599 | T | T | T |
| 0.6971581663908019 | 0.1583090532390606 | 0.0794177859735637 | T | T | T |
| 0.8100934727895793 | 0.1481333852126229 | 0.9781627446440102 | T | T | T |
| 0.9141423421851345 | 0.1686821032637544 | 0.0965223714213798 | T | T | T |
| 0.8978157194889265 | 0.1573300985493176 | 0.2936020951346398 | T | T | T |
| 0.7712678982553869 | 0.1433306019416914 | 0.2433188162353972 | T | T | T |
| 0.6798760565685930 | 0.0519395287858528 | 0.1954154344994266 | T | T | T |
| 0.9187287615088205 | 0.0492787494708657 | 0.1816115163806281 | T | T | T |
| 0.5695455061834259 | 0.8756205457478786 | 0.4202194959548574 | T | T | T |
| 0.5832424866340469 | 0.0069777286077532 | 0.4382248691021146 | T | T | T |
| 0.5979437521873370 | 0.1392782823653567 | 0.4357280343656435 | T | T | T |
| 0.8076317086027754 | 0.8706266699649465 | 0.3934967868347549 | T | T | T |
| 0.8159478106019591 | 0.9983438207471107 | 0.4475222119046882 | T | T | T |
| 0.8081127598467147 | 0.1325243446107847 | 0.4346602649482940 | T | T | T |
| 0.0106014259614790 | 0.9543890399291789 | 0.2171546674954057 | T | T | T |
| 0.0164779462922216 | 0.1365481229360596 | 0.2116615329640657 | T | T | T |
| 0.8577598695627531 | 0.0549887628002119 | 0.7854982916844350 | T | T | T |
| 0.8013798557555655 | 0.0715405265232444 | 0.6092063517118156 | T | T | T |
| 0.7009443208210246 | 0.0594179551503476 | 0.4785253527749122 | T | T | T |
| 0.5999895692784906 | 0.0755570245342214 | 0.6072261067973095 | T | T | T |
| 0.6036554782721105 | 0.0521159635007945 | 0.8042877798205693 | T | T | T |
| 0.7291870097977217 | 0.0287384427827189 | 0.7624571102037787 | T | T | T |
| 0.8598267755630203 | 0.8334634048164921 | 0.7620856789395469 | T | T | T |
| 0.8053977820206367 | 0.8325938532762787 | 0.5854997152059942 | T | T | T |
| 0.6923244900061756 | 0.8512830356732012 | 0.4856851239423737 | T | T | T |
| 0.5886419174817850 | 0.8292692280487252 | 0.6048829429236290 | T | T | T |
| 0.6030460774157297 | 0.8527267184065275 | 0.7991616273434947 | T | T | T |
| 0.7296884577995362 | 0.8570007387769961 | 0.7446851358638930 | T | T | T |
| 0.8182717108436062 | 0.9479378097971743 | 0.6820305531602859 | T | T | T |
| 0.5793820878101783 | 0.9533309157366241 | 0.6727957886919894 | T | T | T |

**Structure files (CONTCAR) involved in this work:**

|                    |                    |                    |   |   |   |
|--------------------|--------------------|--------------------|---|---|---|
| 0.9320293363685115 | 0.1276946375443691 | 0.9086347608460194 | T | T | T |
| 0.9185611355339223 | 0.9974543733126282 | 0.9432241736179074 | T | T | T |
| 0.9031794849021163 | 0.8648426107766263 | 0.9428329839716012 | T | T | T |
| 0.6950982785503369 | 0.1298531329345040 | 0.8849079484300280 | T | T | T |
| 0.6833860619790104 | 0.0035020089059171 | 0.9455016620923644 | T | T | T |
| 0.6962287493942877 | 0.8695231172211876 | 0.9376091798171978 | T | T | T |
| 0.4895808394636000 | 0.0484125553224927 | 0.7146278920707612 | T | T | T |
| 0.4842447610330884 | 0.8644782509414523 | 0.7154977775244992 | T | T | T |
| 0.3601463692710285 | 0.4300249806568548 | 0.7234897120990693 | T | T | T |
| 0.3111247450714424 | 0.4454272334489523 | 0.9062411512804391 | T | T | T |
| 0.1991154084402910 | 0.4614392478644506 | 0.0148336756755305 | T | T | T |
| 0.0908896409210819 | 0.4335230509840833 | 0.9070887683158623 | T | T | T |
| 0.1020602733272643 | 0.4344955729542702 | 0.7091314581102987 | T | T | T |
| 0.2294566897075708 | 0.4500024226772618 | 0.7548044002175073 | T | T | T |
| 0.3590048723766567 | 0.6736389411796855 | 0.7537733549842940 | T | T | T |
| 0.3004401792902318 | 0.6379483306010713 | 0.9206577135453118 | T | T | T |
| 0.1900439382149772 | 0.6474650225441900 | 0.0267062524946391 | T | T | T |
| 0.0926380634653218 | 0.6679015658882510 | 0.8965160915183994 | T | T | T |
| 0.1018646558574569 | 0.6565793334332064 | 0.6994517010086411 | T | T | T |
| 0.2282062616253426 | 0.6482451837425187 | 0.7553121439445986 | T | T | T |
| 0.3165151479587219 | 0.5489952564881018 | 0.7763658760507715 | T | T | T |
| 0.0834962491250458 | 0.5476685859697675 | 0.8104904451013185 | T | T | T |
| 0.4320070915339351 | 0.3752301259549169 | 0.5772904630401358 | T | T | T |
| 0.4128803320743187 | 0.5062593306456015 | 0.5771705229998718 | T | T | T |
| 0.3870907360353355 | 0.6371751088212849 | 0.5685348522418036 | T | T | T |
| 0.1929622056370172 | 0.3621368571004794 | 0.6163080625338569 | T | T | T |
| 0.1822314505489497 | 0.4943385616529938 | 0.5806394683853832 | T | T | T |
| 0.1938566943429282 | 0.6276077104682459 | 0.5635843648137387 | T | T | T |
| 0.9852316302441946 | 0.4558334289267641 | 0.7912383868131411 | T | T | T |
| 0.9862641552325165 | 0.6363782918341229 | 0.7868172884953470 | T | T | T |
| 0.1432534492708805 | 0.5685972954189139 | 0.2204321411924695 | T | T | T |
| 0.1838597682163314 | 0.5514632811946781 | 0.4044369616333258 | T | T | T |
| 0.2951579690604799 | 0.5471622812299315 | 0.5138740760630377 | T | T | T |
| 0.4032753041540644 | 0.5692968709420921 | 0.4034109762361181 | T | T | T |
| 0.3979234197419415 | 0.5644701818784722 | 0.2062737380973120 | T | T | T |
| 0.2718562149668252 | 0.5487390118091773 | 0.2570189169583101 | T | T | T |
| 0.1432411004645685 | 0.3226755824350793 | 0.2505232439224809 | T | T | T |
| 0.1945112995945255 | 0.3614895353372496 | 0.4215840314922944 | T | T | T |
| 0.3086400908246915 | 0.3528323859727551 | 0.5189291467950300 | T | T | T |
| 0.4083301702964874 | 0.3308405249113152 | 0.3911081249951119 | T | T | T |
| 0.3940796434510152 | 0.3454369294934393 | 0.1936357611865550 | T | T | T |
| 0.2723625919206314 | 0.3488908532652035 | 0.2624215132352702 | T | T | T |
| 0.1834331774559327 | 0.4486126068095498 | 0.2736687086177119 | T | T | T |
| 0.4108328864611808 | 0.4517418353775430 | 0.3119661893447667 | T | T | T |
| 0.0662872608718795 | 0.6256132007442292 | 0.0818932846378669 | T | T | T |
| 0.0785322402315926 | 0.4922563436974872 | 0.0850512615523612 | T | T | T |
| 0.1145910180130675 | 0.3640021966435124 | 0.0675981919063282 | T | T | T |
| 0.3065884555115455 | 0.6375562440665908 | 0.1169835405681708 | T | T | T |
| 0.3148381959711291 | 0.5055332062180482 | 0.0801395566000290 | T | T | T |
| 0.2929481378867886 | 0.3729879856675755 | 0.0683664524258405 | T | T | T |
| 0.5111725864061191 | 0.5390046938941198 | 0.2945937366932300 | T | T | T |
| 0.5110981423296276 | 0.3655873457542773 | 0.2753488849125263 | T | T | T |
| 0.4368960143479211 | 0.7496607655999616 | 0.6411410634370891 | T | T | T |

**Structure files (CONTCAR) involved in this work:**

|                     |                    |                    |   |   |   |
|---------------------|--------------------|--------------------|---|---|---|
| 0.1891889687542297  | 0.7494116271368082 | 0.6372637034214722 | T | T | T |
| 0.2757858181547516  | 0.7499137995179175 | 0.0223930178218928 | T | T | T |
| 0.1050518407040765  | 0.7497247414961661 | 0.0507215933494769 | T | T | T |
| 0.0678304856405495  | 0.2480492994347053 | 0.1309489160814244 | T | T | T |
| 0.3082576059196603  | 0.2504532729911669 | 0.1362379861647599 | T | T | T |
| 0.2232896395374306  | 0.2497884445106343 | 0.5218942950642503 | T | T | T |
| 0.3930273039208497  | 0.2506930047487337 | 0.5459013458579599 | T | T | T |
| 0.5550367051216185  | 0.2499522504516867 | 0.3508122233899492 | T | T | T |
| 0.8106954217700592  | 0.2513604397066245 | 0.3481535904566821 | T | T | T |
| 0.7266726188823383  | 0.2506315606451243 | 0.9420507851410351 | T | T | T |
| 0.8923029021703616  | 0.2517771369581166 | 0.9462007009591071 | T | T | T |
| 0.9448542789259403  | 0.7533733257638158 | 0.8584843092159866 | T | T | T |
| 0.6841754055769151  | 0.7529003634205207 | 0.8511794484739162 | T | T | T |
| 0.7740774320404771  | 0.7483139180529773 | 0.4418720882526584 | T | T | T |
| 0.6077566304829496  | 0.7504649402610426 | 0.4491140390545580 | T | T | T |
| 0.9249355374875950  | 0.4743603419223367 | 0.5394215030999614 | T | T | T |
| 0.9530670906357721  | 0.6352379213500312 | 0.5687884656825821 | T | T | T |
| 0.9228697297298790  | 0.5304222374119694 | 0.1962473366601957 | T | T | T |
| 0.8204502829254385  | 0.3355789223414272 | 0.3273870650066336 | T | T | T |
| 0.8018585305629032  | 0.6349903719109454 | 0.6897190734114602 | T | T | T |
| 0.9264639743731783  | 0.4170713128776619 | 0.4303865793971628 | T | T | T |
| 0.8838871605523152  | 0.5565270910924490 | 0.5585267167820825 | T | T | T |
| 0.0296349217734152  | 0.4075671606550700 | 0.4358901990725396 | T | T | T |
| 0.0155341059930573  | 0.6006003567339573 | 0.3214725731317777 | T | T | T |
| 0.0438902355636646  | 0.4262561056136862 | 0.5094773704596373 | T | T | T |
| 0.0485847544150841  | 0.4369846249648092 | 0.3729357555917028 | T | T | T |
| 0.0351806513540696  | 0.3532218225737465 | 0.4252597087841696 | T | T | T |
| 0.0058872231898917  | 0.5677497931830326 | 0.3855256122306612 | T | T | T |
| 0.9773165074339293  | 0.6398202940348922 | 0.3164733434699690 | T | T | T |
| 0.0654626125692582  | 0.6226945727468602 | 0.3263369324878910 | T | T | T |
| -0.0071390228549286 | 0.6226365655556664 | 0.6068791321655317 | T | T | T |
| 0.9302828219363530  | 0.6687082932988552 | 0.6115045691770247 | T | T | T |

**Figure 7(a) ②**

Si O Al Zn C H

1.0000000000000000

20.0219999999999985 0.0000000000000000 0.0000000000000000

0.0000000000000000 19.8990000000000009 0.0000000000000000

0.0000000000000000 0.0000000000000000 13.3829999999999991

93 194 3 2 2 8

Selective dynamics

Direct

|                    |                    |                    |   |   |   |
|--------------------|--------------------|--------------------|---|---|---|
| 0.4225145910203926 | 0.0595462020279037 | 0.6485790971729672 | T | T | T |
| 0.3046527330769712 | 0.0318463983893104 | 0.7919043640066751 | T | T | T |
| 0.2818899259769772 | 0.0552575296050650 | 0.0173199165380797 | T | T | T |
| 0.1225919070944530 | 0.0633013615570602 | 0.0125182209039261 | T | T | T |
| 0.0676461373429475 | 0.0311613610307614 | 0.8014393905950192 | T | T | T |
| 0.1803106424296463 | 0.0658254370393375 | 0.6658202060950762 | T | T | T |
| 0.4188690453185726 | 0.8275709831554494 | 0.6697123491556956 | T | T | T |
| 0.2996188299079197 | 0.8730636108760490 | 0.7987406948722796 | T | T | T |
| 0.2675371073269232 | 0.8310181912398678 | 0.0186560237244745 | T | T | T |
| 0.1114524012208293 | 0.8273177061370803 | 0.0148853352520468 | T | T | T |
| 0.0659690091405128 | 0.8745516316693552 | 0.8003938313738951 | T | T | T |

**Structure files (CONTCAR) involved in this work:**

|                    |                    |                    |   |   |   |
|--------------------|--------------------|--------------------|---|---|---|
| 0.1775004814913359 | 0.8281947968087702 | 0.6637394184448145 | T | T | T |
| 0.0750879838158960 | 0.9419974909358284 | 0.1505225682951956 | T | T | T |
| 0.1954957824146162 | 0.9696686431034366 | 0.2909158229845983 | T | T | T |
| 0.2163734241615811 | 0.9438216965367501 | 0.5173266638188068 | T | T | T |
| 0.3768563353435632 | 0.9346684952158603 | 0.5140671134908527 | T | T | T |
| 0.4327939452427373 | 0.9691126229954596 | 0.3020591936796849 | T | T | T |
| 0.3200707593997223 | 0.9341038671897350 | 0.1655308051932691 | T | T | T |
| 0.0814135831191259 | 0.1723801066486233 | 0.1673265695480100 | T | T | T |
| 0.1993442043147791 | 0.1283700395527703 | 0.2994747886882900 | T | T | T |
| 0.2311378082623752 | 0.1693642370200545 | 0.5176669321674392 | T | T | T |
| 0.3873743240106788 | 0.1737949974664249 | 0.5095335089772388 | T | T | T |
| 0.4340829010045409 | 0.1269678634599176 | 0.2955596353645836 | T | T | T |
| 0.3194458774840515 | 0.1729231388601215 | 0.1631845463214354 | T | T | T |
| 0.5762254684470663 | 0.5561967669727842 | 0.3587004314194410 | T | T | T |
| 0.6892145014505769 | 0.5269899442584213 | 0.2081244012539540 | T | T | T |
| 0.7140889038730488 | 0.5659421028108993 | 0.9912944918083224 | T | T | T |
| 0.8726871860019290 | 0.5727621040633052 | 0.9841058946021972 | T | T | T |
| 0.8112523032824268 | 0.5532442073164759 | 0.3444511695242868 | T | T | T |
| 0.5730503941455515 | 0.3286875442647796 | 0.3315271961378707 | T | T | T |
| 0.6918077789123380 | 0.3735441223855412 | 0.1934058376426763 | T | T | T |
| 0.7327469730810638 | 0.3300199658369773 | 0.9783456244091818 | T | T | T |
| 0.8878339143968322 | 0.3263538315981843 | 0.9886022652062167 | T | T | T |
| 0.9418734735978145 | 0.3739661128171693 | 0.1886212241862313 | T | T | T |
| 0.9202296177386901 | 0.4471350660967705 | 0.8568728492474786 | T | T | T |
| 0.8005068937148294 | 0.4770461200614841 | 0.7181969724941075 | T | T | T |
| 0.7801074081280237 | 0.4396971402939370 | 0.4946494614271119 | T | T | T |
| 0.6227020106157567 | 0.4295058847046270 | 0.4884633821978686 | T | T | T |
| 0.5716294397602319 | 0.4690795150599087 | 0.6993918351134321 | T | T | T |
| 0.6774712508361648 | 0.4492331182159207 | 0.8558441313649812 | T | T | T |
| 0.9196754287540166 | 0.6791745798324608 | 0.8270303106104885 | T | T | T |
| 0.7639296447847854 | 0.6706129653776188 | 0.4622002896615345 | T | T | T |
| 0.6095006863463263 | 0.6745126710619087 | 0.4881002237626965 | T | T | T |
| 0.5612419693483882 | 0.6273047151331043 | 0.6995096116651536 | T | T | T |
| 0.6736025752969880 | 0.6742264978006299 | 0.8328046639131765 | T | T | T |
| 0.5774132611650911 | 0.9471785476771991 | 0.3593109035835302 | T | T | T |
| 0.6978823152267047 | 0.9753506120366046 | 0.2160575108798184 | T | T | T |
| 0.7189005305383669 | 0.9397628775895174 | 0.9945181648895631 | T | T | T |
| 0.8786084710299499 | 0.9354913543067658 | 0.9960369212017353 | T | T | T |
| 0.9297055372118715 | 0.9721927533946116 | 0.2063805265472781 | T | T | T |
| 0.8213420196820720 | 0.9475424606791965 | 0.3564461032597717 | T | T | T |
| 0.5766176086714191 | 0.1742236525022295 | 0.3316235100697348 | T | T | T |
| 0.6974385254877227 | 0.1334024910934448 | 0.1957066572418414 | T | T | T |
| 0.7318001095412107 | 0.1733853688577835 | 0.9738208401017657 | T | T | T |
| 0.8865077932307541 | 0.1741258550780655 | 0.9806794966428488 | T | T | T |
| 0.9342123131523314 | 0.1305828901340935 | 0.1967184222026102 | T | T | T |
| 0.8198400394989040 | 0.1760157787644429 | 0.3329368113423026 | T | T | T |
| 0.9228957033906058 | 0.0536148252929104 | 0.8557640195388614 | T | T | T |
| 0.8000633372044272 | 0.0258300156656320 | 0.7105565961656976 | T | T | T |
| 0.7816061521470823 | 0.0675510106210622 | 0.4928575447888789 | T | T | T |
| 0.6211294990723116 | 0.0715469833770051 | 0.4916043570730387 | T | T | T |
| 0.5683950264727412 | 0.0326769079831831 | 0.7004350184364025 | T | T | T |
| 0.6772599503178905 | 0.0556575494557217 | 0.8519990106945103 | T | T | T |
| 0.9221764969912237 | 0.8316488813269628 | 0.8382502055351967 | T | T | T |

**Structure files (CONTCAR) involved in this work:**

|                    |                    |                    |   |   |   |
|--------------------|--------------------|--------------------|---|---|---|
| 0.8006496490435060 | 0.8675575312862540 | 0.6954881435740958 | T | T | T |
| 0.7666722422019481 | 0.8273333039993364 | 0.4777974389670526 | T | T | T |
| 0.6118646167326723 | 0.8279962995553666 | 0.4905326235319719 | T | T | T |
| 0.5629995570812544 | 0.8756787426653292 | 0.6996359804682074 | T | T | T |
| 0.6769590128961338 | 0.8323555388947457 | 0.8365252632996319 | T | T | T |
| 0.4245431326525159 | 0.4420458595039942 | 0.6436919940968739 | T | T | T |
| 0.3056586642024521 | 0.4689786708345285 | 0.7867008403037957 | T | T | T |
| 0.2796317962619853 | 0.4460712908713183 | 0.0132810665150286 | T | T | T |
| 0.1216531054687710 | 0.4365066127883552 | 0.0152667054003297 | T | T | T |
| 0.0649903305696005 | 0.4693293678707556 | 0.8031725495008682 | T | T | T |
| 0.1777669058285070 | 0.4353755477202273 | 0.6615838321055951 | T | T | T |
| 0.4167493791829522 | 0.6734831444679725 | 0.6677072224206095 | T | T | T |
| 0.2993425878703321 | 0.6274515690153601 | 0.7973183552904187 | T | T | T |
| 0.2683179790176683 | 0.6696932947415222 | 0.0180533991029612 | T | T | T |
| 0.1134738665310865 | 0.6738331740322149 | 0.0109117223699035 | T | T | T |
| 0.0653981220299066 | 0.6278649351145219 | 0.7992458572971713 | T | T | T |
| 0.1771700901195886 | 0.6707600593303805 | 0.6608849031397231 | T | T | T |
| 0.0783761900705689 | 0.5591667799252381 | 0.1472115205788861 | T | T | T |
| 0.1975666560574821 | 0.5286999523872088 | 0.2865206227027667 | T | T | T |
| 0.2145684638395325 | 0.5555817806422297 | 0.5139676757118395 | T | T | T |
| 0.3745351880656724 | 0.5664356738628457 | 0.5135022915649322 | T | T | T |
| 0.4298380790699161 | 0.5307239031677784 | 0.3033627682192070 | T | T | T |
| 0.3224768248106831 | 0.5645934550522835 | 0.1602776213256508 | T | T | T |
| 0.0858813797948039 | 0.3252775963271245 | 0.1641861184358077 | T | T | T |
| 0.1997548598957511 | 0.3708265361654586 | 0.2986580502941029 | T | T | T |
| 0.2299114760298229 | 0.3304316088088942 | 0.5179094271728476 | T | T | T |
| 0.3853704671342000 | 0.3272561510155288 | 0.5067066819531694 | T | T | T |
| 0.4297732894450557 | 0.3741586746909886 | 0.2935895815273328 | T | T | T |
| 0.3181467012839354 | 0.3294478999387149 | 0.1600278728113342 | T | T | T |
| 0.0117488101066908 | 0.5574803908492393 | 0.2261243631184005 | T | T | T |
| 0.3594579226770653 | 0.0702531389312663 | 0.7233184146618660 | T | T | T |
| 0.3171747962483373 | 0.0503320196616003 | 0.9082787787068257 | T | T | T |
| 0.2017633487454119 | 0.0474131298289725 | 0.0055681125621662 | T | T | T |
| 0.0911660258511856 | 0.0702363098156339 | 0.9017021542102335 | T | T | T |
| 0.1035922128270753 | 0.0645370744434608 | 0.7046734172771851 | T | T | T |
| 0.2297618632602699 | 0.0557656001762172 | 0.7613904818888640 | T | T | T |
| 0.3593682125991771 | 0.8282655345357972 | 0.7521317463048164 | T | T | T |
| 0.2993661550199210 | 0.8635670516284408 | 0.9185862414285981 | T | T | T |
| 0.1888793491643451 | 0.8511828526146047 | 0.0254073610430457 | T | T | T |
| 0.0884636644363800 | 0.8328215834606678 | 0.8992101335586302 | T | T | T |
| 0.1013301491456904 | 0.8405896469129470 | 0.7028209995006789 | T | T | T |
| 0.2281206671584385 | 0.8482166759079289 | 0.7542126938038760 | T | T | T |
| 0.3122739302237019 | 0.9514730438452219 | 0.7712841987458581 | T | T | T |
| 0.0895169561670081 | 0.9523355718683896 | 0.8107831207227451 | T | T | T |
| 0.4328870078516881 | 0.1266232723518969 | 0.5809871584285755 | T | T | T |
| 0.4113911877801665 | 0.9956949160107953 | 0.5751383683004959 | T | T | T |
| 0.3935541730506637 | 0.8634520585183237 | 0.5675422622091203 | T | T | T |
| 0.1943567984958101 | 0.1385622432328321 | 0.6152133597653008 | T | T | T |
| 0.1912184028323463 | 0.0054313419704168 | 0.5863698316525721 | T | T | T |
| 0.1924070251028027 | 0.8723212357382680 | 0.5643162144850555 | T | T | T |
| 0.9876359295859709 | 0.0382878540947325 | 0.7862059829965891 | T | T | T |
| 0.9853603081489091 | 0.8708289163086783 | 0.7877468063793135 | T | T | T |
| 0.1387320303633902 | 0.9325881509823810 | 0.2243496831267742 | T | T | T |



**Structure files (CONTCAR) involved in this work:**

|                    |                    |                    |   |   |   |
|--------------------|--------------------|--------------------|---|---|---|
| 0.1830411044172982 | 0.9520044102379080 | 0.4075542114993509 | T | T | T |
| 0.2969054357160284 | 0.9462005446887886 | 0.5092460999948523 | T | T | T |
| 0.4072310290641209 | 0.9314887754727207 | 0.4024324623322789 | T | T | T |
| 0.3964286543749770 | 0.9355274924587574 | 0.2056907088093440 | T | T | T |
| 0.2693572498520178 | 0.9430536973488859 | 0.2598622793047786 | T | T | T |
| 0.1380236975770374 | 0.1714209164792396 | 0.2541277837438081 | T | T | T |
| 0.1975316560208675 | 0.1355940643768372 | 0.4196756698124023 | T | T | T |
| 0.3099185995201876 | 0.1498113789241927 | 0.5196280287849676 | T | T | T |
| 0.4111403326890822 | 0.1683015143689392 | 0.3943040730679888 | T | T | T |
| 0.3959901713102618 | 0.1582784679201091 | 0.1984481099713327 | T | T | T |
| 0.2702419457047465 | 0.1566959141824515 | 0.2574135587404235 | T | T | T |
| 0.1904234401549177 | 0.0498972536658795 | 0.2686018853705662 | T | T | T |
| 0.4133774511605649 | 0.0484609309668045 | 0.3088097190190935 | T | T | T |
| 0.0648319646036462 | 0.8727904950825210 | 0.0871385919621269 | T | T | T |
| 0.0856430184039950 | 0.0027260126657785 | 0.0714983852170711 | T | T | T |
| 0.1095123702566347 | 0.1337310265402096 | 0.0692507508981859 | T | T | T |
| 0.3069721461493157 | 0.8613341108623355 | 0.1140644402228683 | T | T | T |
| 0.3095028089349557 | 0.9943524689789294 | 0.0858151737419598 | T | T | T |
| 0.3003573462688286 | 0.1273129959948326 | 0.0668862890932457 | T | T | T |
| 0.5126348816032129 | 0.9591308170321412 | 0.2884930828892335 | T | T | T |
| 0.5143545368623825 | 0.1336131482694247 | 0.2807034027818142 | T | T | T |
| 0.6375978607594976 | 0.5657207393821346 | 0.2815758796988459 | T | T | T |
| 0.6973149650318446 | 0.5733092494828613 | 0.1093565869900426 | T | T | T |
| 0.7935959831681338 | 0.5545617232606228 | 0.9733269401110540 | T | T | T |
| 0.8959540618687050 | 0.5824010530425527 | 0.0979032060419667 | T | T | T |
| 0.8870128606666486 | 0.5426909399644914 | 0.3095261344559372 | T | T | T |
| 0.7611708257155627 | 0.5208554699517828 | 0.2639007795042151 | T | T | T |
| 0.6361225684983114 | 0.3321011162043290 | 0.2572700627966023 | T | T | T |
| 0.6922564566274237 | 0.3412148280549243 | 0.0814849958077968 | T | T | T |
| 0.8106164298722563 | 0.3521526084079726 | 0.9920461622370497 | T | T | T |
| 0.9185830510405668 | 0.3222017925351647 | 0.1002441330722285 | T | T | T |
| 0.9040769368543244 | 0.3548804294122637 | 0.2915619299145594 | T | T | T |
| 0.7634832388760497 | 0.3698987755863433 | 0.2454475281961039 | T | T | T |
| 0.6645659589915575 | 0.4513091774444020 | 0.1834660874911869 | T | T | T |
| 0.9284450273709471 | 0.4496952354357753 | 0.1529094881820035 | T | T | T |
| 0.5635526034088633 | 0.6265670883077297 | 0.4177066006825426 | T | T | T |
| 0.5919500342801458 | 0.4975276081139636 | 0.4398104805060397 | T | T | T |
| 0.5887414793083848 | 0.3634713568452818 | 0.4394078873601125 | T | T | T |
| 0.7945654096772556 | 0.6322591576186611 | 0.3648245727600972 | T | T | T |
| 0.8010746635768876 | 0.5167947167622960 | 0.4564050761252614 | T | T | T |
| 0.8296190454014568 | 0.3863949866836478 | 0.4402595002804934 | T | T | T |
| 0.0220962609358456 | 0.3647042365835393 | 0.2075618277263933 | T | T | T |
| 0.8553475941830794 | 0.4377091406345914 | 0.7851887059960379 | T | T | T |
| 0.7910834207410457 | 0.4361040706216401 | 0.6140734058490156 | T | T | T |
| 0.7027804414865740 | 0.4263093303086863 | 0.4660271557334926 | T | T | T |
| 0.6080764448711851 | 0.4296284301086042 | 0.6075704790570829 | T | T | T |
| 0.6043290039861718 | 0.4446783517313606 | 0.8040798819444457 | T | T | T |
| 0.7293225510557937 | 0.4812086920348845 | 0.7745145021034012 | T | T | T |
| 0.8692440774983828 | 0.6835720969047536 | 0.7331610594033325 | T | T | T |
| 0.8077368905583785 | 0.6474558265956645 | 0.5593749277091422 | T | T | T |
| 0.6867037152114064 | 0.6486672384609581 | 0.4814713887943572 | T | T | T |
| 0.5840272289297427 | 0.6707297801472042 | 0.6026045037184290 | T | T | T |
| 0.5965730855403242 | 0.6579111772860207 | 0.7987315666963698 | T | T | T |

**Structure files (CONTCAR) involved in this work:**

|                    |                    |                    |   |   |   |
|--------------------|--------------------|--------------------|---|---|---|
| 0.7238124793452678 | 0.6546378443595930 | 0.7435077933985816 | T | T | T |
| 0.8266981540914763 | 0.5530655470520909 | 0.6926021042815810 | T | T | T |
| 0.5822554758625770 | 0.5492813477615857 | 0.6827099423889796 | T | T | T |
| 0.9309625321583577 | 0.3782586823793010 | 0.9198559419062636 | T | T | T |
| 0.9141295372289736 | 0.5121272601021477 | 0.9292033757053073 | T | T | T |
| 0.8868049629111436 | 0.6422258329929178 | 0.9226501428030738 | T | T | T |
| 0.7001963585218177 | 0.3745342439078115 | 0.8889351527650740 | T | T | T |
| 0.6742936389671554 | 0.4997371193618460 | 0.9509454652559087 | T | T | T |
| 0.6890633791374295 | 0.6333411301688794 | 0.9354470511093148 | T | T | T |
| 0.4927027899142176 | 0.4512232456341550 | 0.7068407329062888 | T | T | T |
| 0.4803585334339078 | 0.6324352451078880 | 0.7120870801935784 | T | T | T |
| 0.6429579286601752 | 0.9413086269526595 | 0.2891734013765245 | T | T | T |
| 0.6988834818244014 | 0.9339975784514110 | 0.1115115777200411 | T | T | T |
| 0.7992461093181717 | 0.9480131621463355 | 0.9803882379153724 | T | T | T |
| 0.8973515056561536 | 0.9303468059883346 | 0.1135828999556528 | T | T | T |
| 0.8965621814968013 | 0.9480495086377919 | 0.3110920149284082 | T | T | T |
| 0.7709659734831651 | 0.9698866786138691 | 0.2674225022810893 | T | T | T |
| 0.6393410325579019 | 0.1733161726742510 | 0.2556314417988882 | T | T | T |
| 0.6972187115633675 | 0.1604661950604331 | 0.0815952304059060 | T | T | T |
| 0.8092852127905552 | 0.1482147964210252 | 0.9772016752466254 | T | T | T |
| 0.9133708876985147 | 0.1689342027593486 | 0.0944540360086220 | T | T | T |
| 0.8961215116702188 | 0.1628090805437427 | 0.2921388845015487 | T | T | T |
| 0.7697565570018563 | 0.1458188562724982 | 0.2465991607130600 | T | T | T |
| 0.6794389631833411 | 0.0535951968120236 | 0.1967076001546045 | T | T | T |
| 0.9159255125174102 | 0.0513061169167081 | 0.1863656345039547 | T | T | T |
| 0.5673339855120049 | 0.8773099212100768 | 0.4207444460813269 | T | T | T |
| 0.5831787141258121 | 0.0083828312656065 | 0.4392898252926091 | T | T | T |
| 0.5970986580046050 | 0.1407033994294250 | 0.4382508328395435 | T | T | T |
| 0.8056961633677101 | 0.8720117160419908 | 0.3955608588203229 | T | T | T |
| 0.8159105561296204 | 0.9993537348682651 | 0.4494955840568959 | T | T | T |
| 0.8096430531863390 | 0.1332899155072464 | 0.4362271482671754 | T | T | T |
| 0.0090383753736653 | 0.9563319640499818 | 0.2166231886757581 | T | T | T |
| 0.0145826356926501 | 0.1377401793712930 | 0.2123649767648930 | T | T | T |
| 0.8570880697249891 | 0.0525026982554688 | 0.7861364393279399 | T | T | T |
| 0.8005883256155597 | 0.0722815648375977 | 0.6108649354526071 | T | T | T |
| 0.7010055059092217 | 0.0615617691531061 | 0.4784816985909079 | T | T | T |
| 0.6006473099190056 | 0.0758286876581517 | 0.6089407180222890 | T | T | T |
| 0.6022439325842112 | 0.0531068432791698 | 0.8062578948881453 | T | T | T |
| 0.7278046795913922 | 0.0310968012234590 | 0.7644401680629495 | T | T | T |
| 0.8600082657290088 | 0.8350958178781162 | 0.7615289795642919 | T | T | T |
| 0.8025545831523184 | 0.8316446677819287 | 0.5865632854037538 | T | T | T |
| 0.6895314840161935 | 0.8526098232329257 | 0.4865407181210183 | T | T | T |
| 0.5863750895989640 | 0.8298642182182068 | 0.6055160487240674 | T | T | T |
| 0.6017762378249167 | 0.8522434217676412 | 0.8002900732582829 | T | T | T |
| 0.7289152076437475 | 0.8532218484076523 | 0.7478955489546733 | T | T | T |
| 0.8130408923460943 | 0.9475805269941829 | 0.6817682871240863 | T | T | T |
| 0.5801395756149256 | 0.9536000533154373 | 0.6749476246563690 | T | T | T |
| 0.9311694768379399 | 0.1271834404388211 | 0.9069556499734318 | T | T | T |
| 0.9189632923376133 | 0.9973564497785735 | 0.9442149535499864 | T | T | T |
| 0.9013507658322493 | 0.8651677927615135 | 0.9443850237477696 | T | T | T |
| 0.6927674568689312 | 0.1319307040354690 | 0.8872676695989922 | T | T | T |
| 0.6824181884538241 | 0.0056223897935359 | 0.9477418816432176 | T | T | T |
| 0.6944675504850012 | 0.8717953584650395 | 0.9391477224455705 | T | T | T |

**Structure files (CONTCAR) involved in this work:**

|                    |                    |                    |   |   |   |
|--------------------|--------------------|--------------------|---|---|---|
| 0.4892895717106039 | 0.0478509585815076 | 0.7141879910974193 | T | T | T |
| 0.4831264402009756 | 0.8660999295502895 | 0.7169629750797905 | T | T | T |
| 0.3622163673740463 | 0.4313530050485495 | 0.7203523396791784 | T | T | T |
| 0.3125801550981895 | 0.4466521572753087 | 0.9026102028548941 | T | T | T |
| 0.1993030236131044 | 0.4601355968885076 | 0.0082139053148981 | T | T | T |
| 0.0889794820842109 | 0.4325568176004940 | 0.9050186127452767 | T | T | T |
| 0.1026450632248399 | 0.4368816429717370 | 0.7072237513525247 | T | T | T |
| 0.2308508797333839 | 0.4485573608849620 | 0.7510295312489355 | T | T | T |
| 0.3573494903712869 | 0.6743071915324016 | 0.7505565348037851 | T | T | T |
| 0.2988236231240646 | 0.6374978671290797 | 0.9169521605912788 | T | T | T |
| 0.1898772212069550 | 0.6485463466398405 | 0.0255882306851235 | T | T | T |
| 0.0931700859781850 | 0.6700656666121606 | 0.8940096463072120 | T | T | T |
| 0.1000245023541465 | 0.6564214967742636 | 0.6967415605501415 | T | T | T |
| 0.2266721619139792 | 0.6481536502479066 | 0.7514975830444257 | T | T | T |
| 0.3156885429771634 | 0.5495036464927351 | 0.7714818732786440 | T | T | T |
| 0.0836561680630604 | 0.5489158749747163 | 0.8121872615198802 | T | T | T |
| 0.4327681641186228 | 0.3765102496373359 | 0.5722400816212665 | T | T | T |
| 0.4135310691371819 | 0.5075769116078932 | 0.5732439970552200 | T | T | T |
| 0.3885031994310638 | 0.6385402140536490 | 0.5660575232435561 | T | T | T |
| 0.1908337759714022 | 0.3618159318953311 | 0.6133500846815876 | T | T | T |
| 0.1829819136759087 | 0.4942299963108832 | 0.5777631363917235 | T | T | T |
| 0.1913656001095772 | 0.6275818050546721 | 0.5600055108380309 | T | T | T |
| 0.9854493090737246 | 0.4587436331751853 | 0.7846454450953799 | T | T | T |
| 0.9855113464428424 | 0.6372980302575992 | 0.7874131580147197 | T | T | T |
| 0.1435553954514324 | 0.5687149987945140 | 0.2168745898543407 | T | T | T |
| 0.1844590781752585 | 0.5509574363150199 | 0.4012417753351535 | T | T | T |
| 0.2950727612631022 | 0.5494526160635061 | 0.5134269272641618 | T | T | T |
| 0.4016298244711048 | 0.5710255430621854 | 0.3999717322185435 | T | T | T |
| 0.3981843622689578 | 0.5637931257158173 | 0.2027391572827214 | T | T | T |
| 0.272155551873975  | 0.5507600328524038 | 0.2541469896579658 | T | T | T |
| 0.1429600986821896 | 0.3234562213685072 | 0.2504596868184720 | T | T | T |
| 0.1979298039925634 | 0.3641285730609164 | 0.4186341546588756 | T | T | T |
| 0.3083301016769414 | 0.3510567399361810 | 0.5234330921369196 | T | T | T |
| 0.4043960788803144 | 0.3303164441538473 | 0.3889548026227888 | T | T | T |
| 0.3948771647373796 | 0.3463902662845555 | 0.1914819310703904 | T | T | T |
| 0.2723767884122906 | 0.3476980038907519 | 0.2572502428106400 | T | T | T |
| 0.1855501562656424 | 0.4490381706124679 | 0.2682437218154415 | T | T | T |
| 0.4081695178808178 | 0.4521113086367227 | 0.3120760816457875 | T | T | T |
| 0.0661100435827648 | 0.6243702453499080 | 0.0774929347909868 | T | T | T |
| 0.0794416744748275 | 0.4913735495277371 | 0.0820999723498257 | T | T | T |
| 0.1161295510054000 | 0.3630440502059174 | 0.0657030372185967 | T | T | T |
| 0.3076409203422937 | 0.6382507105603504 | 0.1130032806668256 | T | T | T |
| 0.3135001152368018 | 0.5063226207887151 | 0.0769005094165840 | T | T | T |
| 0.2946927845123992 | 0.3736077689203618 | 0.0640707528296076 | T | T | T |
| 0.5100258025596554 | 0.5372821178569780 | 0.2953079104656971 | T | T | T |
| 0.5098862946689221 | 0.3674635102259400 | 0.2803275496358839 | T | T | T |
| 0.4376503555288340 | 0.7503243520983151 | 0.6427908870659977 | T | T | T |
| 0.1868498990620228 | 0.7494707412277936 | 0.6339591427919167 | T | T | T |
| 0.2764039828120984 | 0.7502472630759989 | 0.0176419816879498 | T | T | T |
| 0.1036285928840937 | 0.7496908463856612 | 0.0511486351921624 | T | T | T |
| 0.0669638948416316 | 0.2491085543178077 | 0.1332287009625164 | T | T | T |
| 0.3109866162881198 | 0.2509389678724116 | 0.1298775850641234 | T | T | T |
| 0.2205675633534363 | 0.2499315207858686 | 0.5165671616897312 | T | T | T |

**Structure files (CONTCAR) involved in this work:**

|                    |                    |                    |   |   |   |
|--------------------|--------------------|--------------------|---|---|---|
| 0.3954239239392836 | 0.2509907036519893 | 0.5463306759114875 | T | T | T |
| 0.5535446746489975 | 0.2509475751970519 | 0.3531367974979703 | T | T | T |
| 0.8068279045058043 | 0.2536348993932090 | 0.3544246654554495 | T | T | T |
| 0.7275865757758849 | 0.2520709281656898 | 0.9440988105353308 | T | T | T |
| 0.8920191857868366 | 0.2511484204790323 | 0.9409422188287117 | T | T | T |
| 0.9435509171507848 | 0.7542089940776214 | 0.8597585462366979 | T | T | T |
| 0.6806862180393151 | 0.7532251703212226 | 0.8609756161881619 | T | T | T |
| 0.7694400759873374 | 0.7501111612448489 | 0.4400063191371150 | T | T | T |
| 0.6040319680091158 | 0.7516035811420778 | 0.4491599978849176 | T | T | T |
| 0.9335753894106854 | 0.4902831350697888 | 0.5287945236887172 | T | T | T |
| 0.9460865649606907 | 0.6472360818194992 | 0.5680220561753960 | T | T | T |
| 0.9228147142886108 | 0.5306238019827529 | 0.1927053694416401 | T | T | T |
| 0.8214737166791375 | 0.3367282956265946 | 0.3268684207265897 | T | T | T |
| 0.7996341479745730 | 0.6389627582261562 | 0.6915909560983643 | T | T | T |
| 0.9336340644332771 | 0.4011660086238127 | 0.4453860571714899 | T | T | T |
| 0.8787127344031220 | 0.5661051536158493 | 0.5568800445902616 | T | T | T |
| 0.0235844952140080 | 0.3707631595276496 | 0.4597547910915407 | T | T | T |
| 0.0162974622402650 | 0.5987651618262441 | 0.3186473434215709 | T | T | T |
| 0.9627541296941691 | 0.4787692690615368 | 0.5847051926163518 | T | T | T |
| 0.0616240637618981 | 0.3994327194410152 | 0.5003705076297766 | T | T | T |
| 0.0432432731295126 | 0.3251584697350350 | 0.4248539620591344 | T | T | T |
| 0.0053941812952037 | 0.5654221672266406 | 0.3817196803970244 | T | T | T |
| 0.9792137451577227 | 0.6390850442171933 | 0.3137795045061612 | T | T | T |
| 0.0667641976744068 | 0.6194403323599008 | 0.3244303837798602 | T | T | T |
| 0.9237166543585489 | 0.6752286785842543 | 0.6199957330437209 | T | T | T |
| 0.9902718343575949 | 0.6374054030191386 | 0.5955524963661005 | T | T | T |

**Figure 7(a) ©**

Si O Al Zn C H

1.0000000000000000

20.0219999999999985 0.0000000000000000 0.0000000000000000

0.0000000000000000 19.8990000000000009 0.0000000000000000

0.0000000000000000 0.0000000000000000 13.3829999999999991

93 194 3 2 2 8

Selective dynamics

Direct

0.4228869238444793 0.0613842205181538 0.6471076801860874 T T T

0.3054628920944850 0.0326637652947171 0.7906628493827049 T T T

0.2825300332243488 0.0557807897522120 0.0159565817747204 T T T

0.1233859272450944 0.0628899185230625 0.0118577803846818 T T T

0.0680244992506592 0.0319815011050474 0.8006547992380278 T T T

0.1804119467237610 0.0662273269851466 0.6644436623334122 T T T

0.4190793160890897 0.8290725342311656 0.6686128761259225 T T T

0.3013113935870256 0.8740721205615974 0.7997893678013562 T T T

0.2674285016735278 0.8319507691397386 0.0185995395168189 T T T

0.1122756339138637 0.8271836089696547 0.0118859665144261 T T T

0.0663999364944759 0.8751638818667893 0.7981276538764053 T T T

0.1795016232796128 0.8299382168702013 0.6640902019416208 T T T

0.0761308291477647 0.9410701021519187 0.1484461450278509 T T T

0.1951802499239234 0.9707211942358580 0.2897587238677564 T T T

0.2166191889126295 0.9450687033331850 0.5155945817074816 T T T

0.3767991550416533 0.9370087624711996 0.5128756611645214 T T T

0.4334840578013421 0.9689522379703719 0.3011890655242336 T T T

**Structure files (CONTCAR) involved in this work:**

|                    |                    |                    |   |   |   |
|--------------------|--------------------|--------------------|---|---|---|
| 0.3205074269826709 | 0.9354893361974520 | 0.1643105654145970 | T | T | T |
| 0.0829886686592220 | 0.1733416316373299 | 0.1654346954936597 | T | T | T |
| 0.1986959464345416 | 0.1294067171536163 | 0.3001963986989714 | T | T | T |
| 0.2314019574169744 | 0.1709833781275470 | 0.5180753107923033 | T | T | T |
| 0.3877467640262479 | 0.1755651967556749 | 0.5083094626036075 | T | T | T |
| 0.4347290974214814 | 0.1272338511545836 | 0.2947601142789048 | T | T | T |
| 0.3191471429104895 | 0.1724540072895951 | 0.1639482382867387 | T | T | T |
| 0.5765920049161979 | 0.5555627880738732 | 0.3563335232646699 | T | T | T |
| 0.6930588850726803 | 0.5264713288530137 | 0.2073298890386950 | T | T | T |
| 0.7157729802731487 | 0.5690669290380731 | 0.9904241923699384 | T | T | T |
| 0.8743155977500553 | 0.5735072875224636 | 0.9903765963728578 | T | T | T |
| 0.8140554463910994 | 0.5489981736214975 | 0.3505958425517758 | T | T | T |
| 0.5729328074612888 | 0.3293194819532767 | 0.3329942969580985 | T | T | T |
| 0.6932053398633879 | 0.3722444502207662 | 0.1924693528976635 | T | T | T |
| 0.7295089757535113 | 0.3281265539752661 | 0.9787912531620496 | T | T | T |
| 0.8842003694558762 | 0.3256297805551130 | 0.9922293022639671 | T | T | T |
| 0.9399389910367036 | 0.3745989386438109 | 0.1872895328565203 | T | T | T |
| 0.9189163357681689 | 0.4457278275009617 | 0.8619665593951541 | T | T | T |
| 0.7992392389891578 | 0.4733364958938792 | 0.7209377285985598 | T | T | T |
| 0.7751601156008380 | 0.4378891642771760 | 0.4988945098310583 | T | T | T |
| 0.6179144262462465 | 0.4296902116551805 | 0.4913724886496658 | T | T | T |
| 0.5693364612706979 | 0.4703833600606804 | 0.7035228878804956 | T | T | T |
| 0.6761096032263409 | 0.4493855121652702 | 0.8593645755182094 | T | T | T |
| 0.9203536876525125 | 0.6790854399483957 | 0.8322672269745280 | T | T | T |
| 0.7689672825414156 | 0.6691388183178801 | 0.4647881075075628 | T | T | T |
| 0.6134934363543909 | 0.6734499108652010 | 0.4857268461903204 | T | T | T |
| 0.5611561403964461 | 0.6286480790159228 | 0.6975512647270407 | T | T | T |
| 0.6709430983163991 | 0.6734505543757702 | 0.8319769063356683 | T | T | T |
| 0.5781247835624749 | 0.9463102140277350 | 0.3583187435951223 | T | T | T |
| 0.6986259032293377 | 0.9746174053016079 | 0.2147355993377573 | T | T | T |
| 0.7193417638397113 | 0.9386822098439269 | 0.9931483075801604 | T | T | T |
| 0.8791717898097631 | 0.9355978137803949 | 0.9948084227197029 | T | T | T |
| 0.9314364421717772 | 0.9709838773002379 | 0.2047314732320573 | T | T | T |
| 0.8223144786026186 | 0.9464977033569020 | 0.3543937333392795 | T | T | T |
| 0.5773133634854800 | 0.1743343346266658 | 0.3301443126629828 | T | T | T |
| 0.6979773515196183 | 0.1330130600917626 | 0.1946201744248956 | T | T | T |
| 0.7314615589228283 | 0.1720728467298855 | 0.9727744952410147 | T | T | T |
| 0.8860565773152397 | 0.1735846380643680 | 0.9816069341591626 | T | T | T |
| 0.9361974706353355 | 0.1292817699819870 | 0.1955532279635332 | T | T | T |
| 0.8213885248537792 | 0.1738483339733869 | 0.3314463050929802 | T | T | T |
| 0.9229809354395446 | 0.0544525363141585 | 0.8549581892851957 | T | T | T |
| 0.8008923354384250 | 0.0255951441759743 | 0.7094927724814899 | T | T | T |
| 0.7813998816255311 | 0.0659235484182406 | 0.4913995534131842 | T | T | T |
| 0.6210928711646554 | 0.0709533384408482 | 0.4899062946962580 | T | T | T |
| 0.5684866342322588 | 0.0326653249704840 | 0.6985930734758143 | T | T | T |
| 0.6776316053184643 | 0.0542709603975123 | 0.8501704536957683 | T | T | T |
| 0.9232726451010803 | 0.8317280161859595 | 0.8365927849080473 | T | T | T |
| 0.8022755803505028 | 0.8676295569071723 | 0.6941621102118501 | T | T | T |
| 0.7695170947988175 | 0.8262803757721496 | 0.4763804804432588 | T | T | T |
| 0.6144875250352446 | 0.8272107962674218 | 0.4896111573936472 | T | T | T |
| 0.5641962129914594 | 0.8755900782329539 | 0.6978852736729165 | T | T | T |
| 0.6784234481142136 | 0.8320297418031478 | 0.8337967151000503 | T | T | T |
| 0.4245205628955604 | 0.4442360167104871 | 0.6418766405617863 | T | T | T |

**Structure files (CONTCAR) involved in this work:**

|                    |                    |                    |   |   |   |
|--------------------|--------------------|--------------------|---|---|---|
| 0.3050975195647415 | 0.4700309027501945 | 0.7843200540591836 | T | T | T |
| 0.2823156617652523 | 0.4448763108733426 | 0.0092340272552848 | T | T | T |
| 0.1235811920282465 | 0.4387513004743827 | 0.0123900025838366 | T | T | T |
| 0.0634739947471440 | 0.4706034703076795 | 0.8013382459391251 | T | T | T |
| 0.1770268545398760 | 0.4383930087328246 | 0.6603786661432055 | T | T | T |
| 0.4169380089342543 | 0.6754028167300345 | 0.6613741113192021 | T | T | T |
| 0.3008770727157746 | 0.6290430439493758 | 0.7960701004551687 | T | T | T |
| 0.2680232828340654 | 0.6705642090924965 | 0.0140114796520042 | T | T | T |
| 0.1125305110428308 | 0.6729918368692699 | 0.0069265821431010 | T | T | T |
| 0.0636918714073117 | 0.6303209483486411 | 0.7931570339181128 | T | T | T |
| 0.1798827614651611 | 0.6726584245967958 | 0.6616936626241774 | T | T | T |
| 0.0749585167997209 | 0.5603538564998205 | 0.1504802999077844 | T | T | T |
| 0.1970399137608429 | 0.5321398505341509 | 0.2847089406957240 | T | T | T |
| 0.2180151358913026 | 0.5581463608104668 | 0.5139179369898181 | T | T | T |
| 0.3769376717367241 | 0.5673585179472465 | 0.5103929471473828 | T | T | T |
| 0.4301653350310670 | 0.5315884024610118 | 0.2984096298696531 | T | T | T |
| 0.3222216291901105 | 0.5643985209856296 | 0.1558315762286612 | T | T | T |
| 0.0857954685775683 | 0.3264728901959429 | 0.1591205492910484 | T | T | T |
| 0.1994615327644434 | 0.3731406797915868 | 0.2962430363669211 | T | T | T |
| 0.2299156870287151 | 0.3321048773003494 | 0.5167773662070237 | T | T | T |
| 0.3855947572090648 | 0.3292667339718722 | 0.5051273637878472 | T | T | T |
| 0.4305645351238453 | 0.3743948013592894 | 0.2910405421704338 | T | T | T |
| 0.3184488268731565 | 0.3294938902863699 | 0.1586017128125154 | T | T | T |
| 0.0103308496117254 | 0.5534076530404850 | 0.2197802101087283 | T | T | T |
| 0.3595609243039617 | 0.0716003459208587 | 0.7214879632081438 | T | T | T |
| 0.3171957934095110 | 0.0531496190419345 | 0.9064110410023497 | T | T | T |
| 0.2024346077437061 | 0.0462658335952158 | 0.0054684270217919 | T | T | T |
| 0.0921424746488654 | 0.0706131117020075 | 0.9010059576537508 | T | T | T |
| 0.1038332347416328 | 0.0657645052215236 | 0.7040088345548342 | T | T | T |
| 0.2300257604698079 | 0.0541399198272878 | 0.7591759512503448 | T | T | T |
| 0.3605160918012610 | 0.8286688461453868 | 0.7525703434933858 | T | T | T |
| 0.3014039856655079 | 0.8639538670029864 | 0.9194922296165249 | T | T | T |
| 0.1890553125412270 | 0.8533072494675263 | 0.0215281537977634 | T | T | T |
| 0.0883742373989209 | 0.8331868282064452 | 0.8966407205235655 | T | T | T |
| 0.1027270012336716 | 0.8419456801713984 | 0.7007579143614325 | T | T | T |
| 0.2291528299308286 | 0.8510453264774785 | 0.7553018627614846 | T | T | T |
| 0.3153901669135859 | 0.9523300186655607 | 0.7725720826889555 | T | T | T |
| 0.0894274321702552 | 0.9530974358171375 | 0.8091264030237991 | T | T | T |
| 0.4331808020183417 | 0.1290981505117281 | 0.5809675284518981 | T | T | T |
| 0.4121031359818204 | 0.9984231835226578 | 0.5719850794885635 | T | T | T |
| 0.3924266293780409 | 0.8664711958180400 | 0.5685714489220611 | T | T | T |
| 0.1955684418489276 | 0.1393962031125808 | 0.6158705186160692 | T | T | T |
| 0.1896920412580978 | 0.0069280611344808 | 0.5827882511688767 | T | T | T |
| 0.1947563432166451 | 0.8735935943578851 | 0.5643804091915892 | T | T | T |
| 0.9879996428762805 | 0.0396539540421495 | 0.7858435620444260 | T | T | T |
| 0.9858239734583872 | 0.8710936841923693 | 0.7844744286941655 | T | T | T |
| 0.1404685484468737 | 0.9323119657984328 | 0.2211250085439214 | T | T | T |
| 0.1831022966879933 | 0.9506673833970496 | 0.4056365533836123 | T | T | T |
| 0.2970788555816382 | 0.9499777068066785 | 0.5075011565572594 | T | T | T |
| 0.4074957886592355 | 0.9316851985092689 | 0.4016188135324671 | T | T | T |
| 0.3968236084341737 | 0.9358106927427238 | 0.2048262782469167 | T | T | T |
| 0.2702261941852473 | 0.9481391312988429 | 0.2582354688138822 | T | T | T |
| 0.1394560193808468 | 0.1743870684462770 | 0.2525015714594212 | T | T | T |

**Structure files (CONTCAR) involved in this work:**

|                    |                    |                    |   |   |   |
|--------------------|--------------------|--------------------|---|---|---|
| 0.1964572864175590 | 0.1384375889951662 | 0.4201613786810519 | T | T | T |
| 0.3101952718227096 | 0.1516025688763392 | 0.5174463720332684 | T | T | T |
| 0.4122309020325080 | 0.1689387113879763 | 0.3935133356437265 | T | T | T |
| 0.3960500524636960 | 0.1582384201345833 | 0.1978983853219085 | T | T | T |
| 0.2709793890999532 | 0.1542315228057164 | 0.2586355204689040 | T | T | T |
| 0.1863819234251018 | 0.0510974885852355 | 0.2711694968411759 | T | T | T |
| 0.4150179230329643 | 0.0485446587124041 | 0.3083939595458792 | T | T | T |
| 0.0654451385389682 | 0.8722548839063738 | 0.0846855020935497 | T | T | T |
| 0.0854960720019109 | 0.0027148300858752 | 0.0703769339953927 | T | T | T |
| 0.1113092863227756 | 0.1335041241691099 | 0.0687810612867358 | T | T | T |
| 0.3054716768717272 | 0.8623720780437454 | 0.1153707365637703 | T | T | T |
| 0.3120146367036052 | 0.9946367789689861 | 0.0821368578515575 | T | T | T |
| 0.2997615760277660 | 0.1276454866964186 | 0.0670169531200496 | T | T | T |
| 0.5131850363248655 | 0.9575132340943353 | 0.2876052455801550 | T | T | T |
| 0.5149318588570926 | 0.1342754963633544 | 0.2787864423031871 | T | T | T |
| 0.6388830618707088 | 0.5619454963427577 | 0.2801201534036685 | T | T | T |
| 0.7036210049667952 | 0.5740405044185424 | 0.1103546677738422 | T | T | T |
| 0.7948193855157694 | 0.5662630601429552 | 0.9624566707128235 | T | T | T |
| 0.8863381398928832 | 0.5782773250975870 | 0.1083519310755694 | T | T | T |
| 0.8898144446021101 | 0.5270269941101675 | 0.3217452501321146 | T | T | T |
| 0.7633382397027147 | 0.5210376710012052 | 0.2679705880169325 | T | T | T |
| 0.6384773176593818 | 0.3355793014510819 | 0.2640124570727227 | T | T | T |
| 0.6892719002272556 | 0.3363701020458914 | 0.0830715380040142 | T | T | T |
| 0.8071182001284636 | 0.3517452148610062 | 0.9918164340951287 | T | T | T |
| 0.9112943541380165 | 0.3201990273956532 | 0.1068155537922183 | T | T | T |
| 0.9053721162085481 | 0.3593563286080209 | 0.2977380923739926 | T | T | T |
| 0.7664498850462965 | 0.3661188927945287 | 0.2392567054230335 | T | T | T |
| 0.6703105563932831 | 0.4508765313366933 | 0.1785263188940189 | T | T | T |
| 0.9242796616269492 | 0.4489535221103133 | 0.1521836988361465 | T | T | T |
| 0.5670825318853094 | 0.6267422526001344 | 0.4143639998791793 | T | T | T |
| 0.5880122317327793 | 0.4970912539928082 | 0.4397215098428894 | T | T | T |
| 0.5845011454985248 | 0.3631707008987506 | 0.4428003155449893 | T | T | T |
| 0.8046596047875806 | 0.6293486320510544 | 0.3713544093292833 | T | T | T |
| 0.7978731404997510 | 0.5153957496325458 | 0.4632329137911927 | T | T | T |
| 0.8228013136621153 | 0.3864475904871460 | 0.4376334886728411 | T | T | T |
| 0.0200133522723481 | 0.3629967112565635 | 0.2036720849993622 | T | T | T |
| 0.8546645585908319 | 0.4352152078428672 | 0.7884647874677105 | T | T | T |
| 0.7874859804553729 | 0.4315397261624954 | 0.6176867836284690 | T | T | T |
| 0.6980192081902175 | 0.4264724733790825 | 0.4695411442615893 | T | T | T |
| 0.6040635429195480 | 0.4303054489956656 | 0.6106106919842890 | T | T | T |
| 0.6024330980502784 | 0.4472830074213868 | 0.8086957770604999 | T | T | T |
| 0.7282150816076153 | 0.4785452601002083 | 0.7766062169657867 | T | T | T |
| 0.8592351380067180 | 0.6800034495308649 | 0.7560895565471878 | T | T | T |
| 0.8102703713615302 | 0.6472826470999264 | 0.5655725580191459 | T | T | T |
| 0.6909349638047122 | 0.6474430725039458 | 0.4776322448788321 | T | T | T |
| 0.5878073607972834 | 0.6692663969133059 | 0.6000619385186660 | T | T | T |
| 0.5931612676573923 | 0.6613491017590062 | 0.7978450787455844 | T | T | T |
| 0.7184995596059099 | 0.6473642707448870 | 0.7429315673188392 | T | T | T |
| 0.8252396912689601 | 0.5494343221523211 | 0.6939725084297748 | T | T | T |
| 0.5813025604241225 | 0.5500583825246953 | 0.6853871023685574 | T | T | T |
| 0.9295803305488516 | 0.3771242664787039 | 0.9261539819745228 | T | T | T |
| 0.9115136514971928 | 0.5096170341726728 | 0.9354559582916284 | T | T | T |
| 0.9051881770517850 | 0.6403782146250262 | 0.9360098926260150 | T | T | T |

**Structure files (CONTCAR) involved in this work:**

|                    |                    |                    |   |   |   |
|--------------------|--------------------|--------------------|---|---|---|
| 0.6952823772258779 | 0.3735370557014992 | 0.8920640133712384 | T | T | T |
| 0.6783248717094115 | 0.5002165324943434 | 0.9540146768514007 | T | T | T |
| 0.6828744253807530 | 0.6342174224608289 | 0.9373360627502704 | T | T | T |
| 0.4903688570218672 | 0.4523108966351663 | 0.7110310688468781 | T | T | T |
| 0.4803035275855586 | 0.6344113125462485 | 0.7059329784560436 | T | T | T |
| 0.6439056548330798 | 0.9410544973910759 | 0.2885177129513354 | T | T | T |
| 0.6986054023434273 | 0.9335002545285488 | 0.1100010571740215 | T | T | T |
| 0.7996499805273117 | 0.9478785400266975 | 0.9804393882208670 | T | T | T |
| 0.8985210692320863 | 0.9295325787668028 | 0.1120816337623401 | T | T | T |
| 0.8976864698933696 | 0.9485225911265357 | 0.3098179793902612 | T | T | T |
| 0.7720281963778336 | 0.9685160791204196 | 0.2650476899529848 | T | T | T |
| 0.6403356351972210 | 0.1735581295772773 | 0.2545832887720300 | T | T | T |
| 0.6963932108942090 | 0.1591811201401150 | 0.0801375737677260 | T | T | T |
| 0.8090129009186746 | 0.1473297949691870 | 0.9783719847681259 | T | T | T |
| 0.9138070603295361 | 0.1685080133238981 | 0.0948344150908984 | T | T | T |
| 0.8976063754146789 | 0.1591890788882934 | 0.2922584267593805 | T | T | T |
| 0.7706606891104260 | 0.1464043798176554 | 0.2441706099230491 | T | T | T |
| 0.6806259589948256 | 0.0531549161952140 | 0.1969251781447519 | T | T | T |
| 0.9191092625681737 | 0.0501118192227071 | 0.1828328984857211 | T | T | T |
| 0.5696307621271546 | 0.8763201318137464 | 0.4199480843050007 | T | T | T |
| 0.5828008105587575 | 0.0079335963603739 | 0.4378370748383404 | T | T | T |
| 0.5977492751500911 | 0.1403087311356276 | 0.4364007975731237 | T | T | T |
| 0.8077767592094334 | 0.8704994636950968 | 0.3926911157230615 | T | T | T |
| 0.8155893070148251 | 0.9976376882474174 | 0.4481755633966411 | T | T | T |
| 0.8093037215964896 | 0.1315627848873232 | 0.4343220719089740 | T | T | T |
| 0.0104858345271830 | 0.9544947300053120 | 0.2160691761142731 | T | T | T |
| 0.0162802185903045 | 0.1387019310333389 | 0.2112394693907348 | T | T | T |
| 0.8573555219491238 | 0.0539961070933070 | 0.7847343478342231 | T | T | T |
| 0.8006350028262375 | 0.0714647318119651 | 0.6091500749741714 | T | T | T |
| 0.7008835073433578 | 0.0601524395703695 | 0.4769966100153222 | T | T | T |
| 0.6007010988193483 | 0.0759335456377942 | 0.6071623637977187 | T | T | T |
| 0.6026953156826304 | 0.0526038724411072 | 0.8043037788663213 | T | T | T |
| 0.7283630250415456 | 0.0297066674208775 | 0.7628262214150758 | T | T | T |
| 0.8607050510952760 | 0.8341755725979932 | 0.7605688825908155 | T | T | T |
| 0.8051965157950801 | 0.8322774576542650 | 0.5849308875935412 | T | T | T |
| 0.6923106403590182 | 0.8513227482223696 | 0.4850440300342245 | T | T | T |
| 0.5884494599692548 | 0.8295585423566026 | 0.6043350547180831 | T | T | T |
| 0.6030865970307884 | 0.8524749474515854 | 0.7987294200176968 | T | T | T |
| 0.7298525883306729 | 0.8542341562824963 | 0.7450766990389235 | T | T | T |
| 0.8157569110630136 | 0.9476055056848454 | 0.6815158691861027 | T | T | T |
| 0.5803800963076229 | 0.9536898224001957 | 0.6726319826137067 | T | T | T |
| 0.9309888175619077 | 0.1279501036420695 | 0.9066073451412717 | T | T | T |
| 0.9185800793882917 | 0.9981664125836823 | 0.9431940274475008 | T | T | T |
| 0.9023156574477386 | 0.8659412608073404 | 0.9421171149050221 | T | T | T |
| 0.6936048077425137 | 0.1303621605662220 | 0.8855854487856756 | T | T | T |
| 0.6822677975291707 | 0.0039437098990648 | 0.9455572946148529 | T | T | T |
| 0.6961800679055717 | 0.8702848485297974 | 0.9375249474902747 | T | T | T |
| 0.4895694281359843 | 0.0487204976131888 | 0.7126595080225800 | T | T | T |
| 0.4843189680542218 | 0.8663090589369713 | 0.7150739282629547 | T | T | T |
| 0.3594199269080760 | 0.4334226308199656 | 0.7128139098039499 | T | T | T |
| 0.3152942952310822 | 0.4449735088779292 | 0.8983640159909820 | T | T | T |
| 0.2023302308659274 | 0.4575035442373236 | 0.0029080493783840 | T | T | T |
| 0.0910491597743186 | 0.4350526735162716 | 0.9014824301790606 | T | T | T |



**Structure files (CONTCAR) involved in this work:**

|                    |                    |                    |   |   |   |
|--------------------|--------------------|--------------------|---|---|---|
| 0.1007264935023614 | 0.4393539368300928 | 0.7032507146251955 | T | T | T |
| 0.2291904341477299 | 0.4507079367270671 | 0.7513568071241121 | T | T | T |
| 0.3569916644591635 | 0.6750678275701615 | 0.7429400888718218 | T | T | T |
| 0.3044571479491265 | 0.6415888587247026 | 0.9149231549217512 | T | T | T |
| 0.1899600293277120 | 0.6480704892652220 | 0.0112511747502597 | T | T | T |
| 0.0865410231664719 | 0.6708455405224646 | 0.8916923825313937 | T | T | T |
| 0.1024782162857325 | 0.6586774572505261 | 0.6945847548891901 | T | T | T |
| 0.2270126297874472 | 0.6495750348406275 | 0.7548155206876861 | T | T | T |
| 0.3158356660016245 | 0.5505776030899846 | 0.7720742945931997 | T | T | T |
| 0.0785272423584792 | 0.5508418296690738 | 0.8064227562159431 | T | T | T |
| 0.4330710106503647 | 0.3786955397389626 | 0.5703006655770452 | T | T | T |
| 0.4182692129795356 | 0.5104684712255723 | 0.5713380737536102 | T | T | T |
| 0.3904596778049139 | 0.6409207042431442 | 0.5584913126792985 | T | T | T |
| 0.1901245040403554 | 0.3651227494766572 | 0.6105482215507156 | T | T | T |
| 0.1839075008554325 | 0.4975520992559465 | 0.5773449833507155 | T | T | T |
| 0.1972192872331184 | 0.6302993317665713 | 0.5612928897048030 | T | T | T |
| 0.9836882188073076 | 0.4567692593763120 | 0.7879981005683327 | T | T | T |
| 0.9837970978695256 | 0.6422619397881899 | 0.7710663632291298 | T | T | T |
| 0.1421689295299758 | 0.5717360825337291 | 0.2186442555495793 | T | T | T |
| 0.1895672397868925 | 0.5548336807239704 | 0.4007846102398199 | T | T | T |
| 0.2981703711902727 | 0.5482000345410020 | 0.5160593946333194 | T | T | T |
| 0.4014762648882582 | 0.5707093447357573 | 0.3956565472471409 | T | T | T |
| 0.3981906989649258 | 0.5648927806677179 | 0.1983406640322628 | T | T | T |
| 0.2723787228735122 | 0.5496018918507268 | 0.2493499928882474 | T | T | T |
| 0.1416187846401822 | 0.3270178010312636 | 0.2473587777150064 | T | T | T |
| 0.1967166875691475 | 0.3628750639378804 | 0.4160941023606876 | T | T | T |
| 0.3082644591045339 | 0.3530935636612725 | 0.5203446909531628 | T | T | T |
| 0.4051692472608130 | 0.3318679295935612 | 0.3876693473219467 | T | T | T |
| 0.3954250155609929 | 0.3447043879844002 | 0.1905365341261059 | T | T | T |
| 0.2719614723900685 | 0.3507513020255760 | 0.2538630291164108 | T | T | T |
| 0.1844077601552031 | 0.4516272243943026 | 0.2713197616087007 | T | T | T |
| 0.4094791577571895 | 0.4526375955237802 | 0.3064484018259143 | T | T | T |
| 0.0671175305696713 | 0.6250270883725364 | 0.0761261941897436 | T | T | T |
| 0.0857022047872887 | 0.4942220274041684 | 0.0795652529042199 | T | T | T |
| 0.1149487221888664 | 0.3643939676596214 | 0.0609382151572994 | T | T | T |
| 0.3052120742987935 | 0.6378542473333849 | 0.1099426820720891 | T | T | T |
| 0.3156993673277393 | 0.5057958637758833 | 0.0721466989114976 | T | T | T |
| 0.2977447019517733 | 0.3725236591694129 | 0.0604235023848085 | T | T | T |
| 0.5104155319190825 | 0.5393582033717392 | 0.2913185384804604 | T | T | T |
| 0.5107662042479257 | 0.3671467532590663 | 0.2778840324720058 | T | T | T |
| 0.4376850588557121 | 0.7524497709652141 | 0.6380771663324101 | T | T | T |
| 0.1903414952854329 | 0.7513607113955429 | 0.6355547381953803 | T | T | T |
| 0.2752380663434943 | 0.7512189125589402 | 0.0191175656035223 | T | T | T |
| 0.1067037904855214 | 0.7495589065642998 | 0.0470498873510402 | T | T | T |
| 0.0681297192011085 | 0.2496872479258189 | 0.1295280241574062 | T | T | T |
| 0.3093457197600429 | 0.2505740887731798 | 0.1322889669729893 | T | T | T |
| 0.2208324698700456 | 0.2515793788650796 | 0.5197466173968098 | T | T | T |
| 0.3952503489349668 | 0.2529291512267540 | 0.5447022716276265 | T | T | T |
| 0.5545460079320806 | 0.2510689706831155 | 0.3519415805459105 | T | T | T |
| 0.8114564496808486 | 0.2518397848185281 | 0.3542473412059687 | T | T | T |
| 0.7264240520537063 | 0.2505926006862602 | 0.9421460844277435 | T | T | T |
| 0.8901526310396093 | 0.2510311562360314 | 0.9434918885472634 | T | T | T |
| 0.9451897895135453 | 0.7548163227138663 | 0.8591338624087898 | T | T | T |

**Structure files (CONTCAR) involved in this work:**

|                    |                    |                    |   |   |   |
|--------------------|--------------------|--------------------|---|---|---|
| 0.6831766209035632 | 0.7525793405732593 | 0.8552009222003931 | T | T | T |
| 0.7744965181163428 | 0.7484646937078115 | 0.4408325923850397 | T | T | T |
| 0.6080684226189184 | 0.7507912878383709 | 0.4480914207110012 | T | T | T |
| 0.9199970350865364 | 0.4766708959415222 | 0.5397842115988950 | T | T | T |
| 0.9608072942808766 | 0.6205480685637720 | 0.5731521460283380 | T | T | T |
| 0.9275684563094124 | 0.5302928505944561 | 0.1978871115757761 | T | T | T |
| 0.8205722469177703 | 0.3351370256735677 | 0.3271647507134016 | T | T | T |
| 0.7971316923045036 | 0.6357211573336078 | 0.6975316929086068 | T | T | T |
| 0.9205700173572681 | 0.4243709807575753 | 0.4145883542251946 | T | T | T |
| 0.8762012381197630 | 0.5625421693342068 | 0.5633355041320240 | T | T | T |
| 0.0250204845391332 | 0.4036888524781432 | 0.4396003532322978 | T | T | T |
| 0.0563650624434389 | 0.4707388063884853 | 0.4325014301783470 | T | T | T |
| 0.9532318788063848 | 0.4635106287326943 | 0.5892488572759430 | T | T | T |
| 0.0330335932162156 | 0.3687690273988854 | 0.3775560763823814 | T | T | T |
| 0.0227593581626083 | 0.3796183969122293 | 0.5133277267395006 | T | T | T |
| 0.0450990684806007 | 0.5039490814869249 | 0.4956497856131017 | T | T | T |
| 0.0452361159977501 | 0.4971559969987005 | 0.3620233442688277 | T | T | T |
| 0.1112174859141473 | 0.4631354543507223 | 0.4324934413080492 | T | T | T |
| 0.9694748011757172 | 0.6357309534015457 | 0.6433965079003041 | T | T | T |
| 0.9641570195957105 | 0.6598430421930315 | 0.5300612308289180 | T | T | T |

**Figure 7(a) ④**

Si O Al Zn C H

1.0000000000000000

20.0219999999999985 0.0000000000000000 0.0000000000000000

0.0000000000000000 19.8990000000000009 0.0000000000000000

0.0000000000000000 0.0000000000000000 13.3829999999999991

93 194 3 2 2 8

Selective dynamics

Direct

|                    |                    |                    |   |   |   |
|--------------------|--------------------|--------------------|---|---|---|
| 0.4235691122555082 | 0.0596556776828219 | 0.6492226807511284 | T | T | T |
| 0.3057965016270808 | 0.0298232071921089 | 0.7936573845441569 | T | T | T |
| 0.2824954402833567 | 0.0577391467204689 | 0.0176925654913507 | T | T | T |
| 0.1226429114904860 | 0.0632247412182986 | 0.0135978740934264 | T | T | T |
| 0.0680519864168153 | 0.0306859664795397 | 0.8015640292149205 | T | T | T |
| 0.1810746854540796 | 0.0631662877969728 | 0.6662113647653610 | T | T | T |
| 0.4208395410600239 | 0.8276969319922051 | 0.6718993776476180 | T | T | T |
| 0.3024332898543677 | 0.8703523643229363 | 0.8045870176951122 | T | T | T |
| 0.2673181811855302 | 0.8326120570131769 | 0.0249547966476427 | T | T | T |
| 0.1127348337597117 | 0.8284288557442490 | 0.0145551986370155 | T | T | T |
| 0.0660020782518549 | 0.8741654009236297 | 0.8001651649055572 | T | T | T |
| 0.1803158551021112 | 0.8265416405364118 | 0.6698614919392231 | T | T | T |
| 0.0766397580964210 | 0.9413018681953766 | 0.1522674173823152 | T | T | T |
| 0.1947383156628294 | 0.9701422950609957 | 0.2957036713243094 | T | T | T |
| 0.2177642122517817 | 0.9411985485110536 | 0.5198449395803143 | T | T | T |
| 0.3781575507334741 | 0.9350338383143101 | 0.5154256946650541 | T | T | T |
| 0.4341031467950118 | 0.9689999188409422 | 0.3042935704158257 | T | T | T |
| 0.3202435963926882 | 0.9386853069329079 | 0.1681022219056972 | T | T | T |
| 0.0817546354732560 | 0.1728990045393658 | 0.1677788996711817 | T | T | T |
| 0.1979186800963377 | 0.1294251701883476 | 0.3039773131249317 | T | T | T |
| 0.2326002825708577 | 0.1703564017866504 | 0.5222891294058665 | T | T | T |
| 0.3876365435720303 | 0.1740411829869052 | 0.5103866296718282 | T | T | T |
| 0.4361332787987723 | 0.1272254702637055 | 0.2977728712872107 | T | T | T |

**Structure files (CONTCAR) involved in this work:**

|                    |                    |                    |   |   |   |
|--------------------|--------------------|--------------------|---|---|---|
| 0.3193690933935637 | 0.1714181569197751 | 0.1680059745003055 | T | T | T |
| 0.5777467500065373 | 0.5556634052519099 | 0.3578118226037208 | T | T | T |
| 0.6970318946123827 | 0.5240817099664153 | 0.2130500192803582 | T | T | T |
| 0.7164021878641910 | 0.5665954494088580 | 0.9943737335934949 | T | T | T |
| 0.8749707558034251 | 0.5716047876916442 | 0.9858658638121496 | T | T | T |
| 0.8174558083918272 | 0.5520697897441640 | 0.3518207633463333 | T | T | T |
| 0.5777771146339304 | 0.3274975719339884 | 0.3360048773428796 | T | T | T |
| 0.6965991576772150 | 0.3706152554096823 | 0.1948958108891607 | T | T | T |
| 0.7327491854241942 | 0.3275778657445224 | 0.9813871266332415 | T | T | T |
| 0.8877135596678799 | 0.3259138996281769 | 0.9964934790448516 | T | T | T |
| 0.9404657750092328 | 0.3699073724442320 | 0.2006089816978585 | T | T | T |
| 0.9209514397329277 | 0.4437741402125760 | 0.8597323401332613 | T | T | T |
| 0.8001258349741075 | 0.4710446482696198 | 0.7225765963772418 | T | T | T |
| 0.7775451356910342 | 0.4364374265055671 | 0.4978895986273800 | T | T | T |
| 0.6198638157443022 | 0.4320648147526379 | 0.4915669878134090 | T | T | T |
| 0.5710391630272132 | 0.4697329058219313 | 0.7044819260800990 | T | T | T |
| 0.6769428446615450 | 0.4480153229118918 | 0.8617353236052934 | T | T | T |
| 0.9195799842918756 | 0.6799107770285228 | 0.8334556339483473 | T | T | T |
| 0.7655871341081814 | 0.6676786766961311 | 0.4714487607715044 | T | T | T |
| 0.6110618931077269 | 0.6729232855123437 | 0.4914945481348406 | T | T | T |
| 0.5610785225815946 | 0.6278939791065574 | 0.7039677787577722 | T | T | T |
| 0.6744358509716362 | 0.6713516192670382 | 0.8354197352511045 | T | T | T |
| 0.5784427938730428 | 0.9442648740336769 | 0.3600367143889396 | T | T | T |
| 0.6979130801779324 | 0.9722150512810186 | 0.2149965261921568 | T | T | T |
| 0.7200857015517602 | 0.9377077665839193 | 0.9942029289587184 | T | T | T |
| 0.8798379921743489 | 0.9367099187277679 | 0.9962507482426771 | T | T | T |
| 0.9315173290430706 | 0.9706190387352688 | 0.2076207524934140 | T | T | T |
| 0.8212330630931363 | 0.9437411617505003 | 0.3546557541171695 | T | T | T |
| 0.5793994789975243 | 0.1727972192462134 | 0.3324206570823848 | T | T | T |
| 0.6985110759539490 | 0.1293458940868947 | 0.1951989687039983 | T | T | T |
| 0.7342883309615825 | 0.1714210096334967 | 0.9751679846323643 | T | T | T |
| 0.8890713649039079 | 0.1737573768155323 | 0.9830640549596367 | T | T | T |
| 0.9367628924075302 | 0.1291391414954431 | 0.1989444521411348 | T | T | T |
| 0.8200209645940673 | 0.1706009914100516 | 0.3319740893659688 | T | T | T |
| 0.9236557832194496 | 0.0549459531099795 | 0.8558493277206485 | T | T | T |
| 0.8016267579042354 | 0.0248055659758025 | 0.7118425930597231 | T | T | T |
| 0.7825304076584814 | 0.0628207017247642 | 0.4926271219742497 | T | T | T |
| 0.6222283146781930 | 0.0685726972514515 | 0.4919006889732325 | T | T | T |
| 0.5695263586641253 | 0.0322048801734994 | 0.7017684580643181 | T | T | T |
| 0.6787397642415075 | 0.0538559969676601 | 0.8523768039172479 | T | T | T |
| 0.9228763983726214 | 0.8317526004653769 | 0.8375024113985230 | T | T | T |
| 0.8027441808957562 | 0.8668833383829221 | 0.6946328253740833 | T | T | T |
| 0.7680575273699876 | 0.8252045538487623 | 0.4777057958372933 | T | T | T |
| 0.6136387410733745 | 0.8265277708295075 | 0.4926994784692668 | T | T | T |
| 0.5647589638922218 | 0.8747875792283391 | 0.7023283884766951 | T | T | T |
| 0.6801214542871551 | 0.8302868165650299 | 0.8345323998550616 | T | T | T |
| 0.4263825676240430 | 0.4440992315464239 | 0.6396949557527750 | T | T | T |
| 0.3058353110539436 | 0.4705893847184192 | 0.7842079960859694 | T | T | T |
| 0.2837843210350273 | 0.4395285174347289 | 0.0052490754558286 | T | T | T |
| 0.1245976091307434 | 0.4340537008596101 | 0.0074332701098727 | T | T | T |
| 0.0658515337295304 | 0.4699764563457927 | 0.7994690091848887 | T | T | T |
| 0.1787122056690390 | 0.4429568271178560 | 0.6526979422692847 | T | T | T |
| 0.4204228892692868 | 0.6736802449758625 | 0.6609419105705160 | T | T | T |

**Structure files (CONTCAR) involved in this work:**

|                    |                    |                    |   |   |   |
|--------------------|--------------------|--------------------|---|---|---|
| 0.3013503677739289 | 0.6291035967731486 | 0.7959951878893632 | T | T | T |
| 0.2697962768374422 | 0.6728415028696476 | 0.0156036340097307 | T | T | T |
| 0.1158185484319172 | 0.6747115295237585 | 0.0063526515877971 | T | T | T |
| 0.0642513083515107 | 0.6289587100406963 | 0.7975770693692631 | T | T | T |
| 0.1787669813718871 | 0.6680825039254241 | 0.6615703534123338 | T | T | T |
| 0.0815792236381924 | 0.5581331254565363 | 0.1387382542000217 | T | T | T |
| 0.2013594477624322 | 0.5280876452171919 | 0.2801679801458263 | T | T | T |
| 0.2222719418908169 | 0.5603235820757588 | 0.5083276857864316 | T | T | T |
| 0.3820530426931582 | 0.5678679441455476 | 0.5066007153238229 | T | T | T |
| 0.4331151619671377 | 0.5302071447773524 | 0.2945739959006265 | T | T | T |
| 0.3265102007580775 | 0.5586174602055441 | 0.1436702831093780 | T | T | T |
| 0.0846468795852526 | 0.3256622657265119 | 0.1626081311017945 | T | T | T |
| 0.1998943150420797 | 0.3702034001103935 | 0.2999831259987231 | T | T | T |
| 0.2314007563188819 | 0.3310009615577845 | 0.5206677572629268 | T | T | T |
| 0.3860710627853457 | 0.3280993966651431 | 0.5066855288242573 | T | T | T |
| 0.4348457046373186 | 0.3722984866826602 | 0.2938562704579255 | T | T | T |
| 0.3203954405364480 | 0.3291449731736641 | 0.1645519349399084 | T | T | T |
| 0.0143044173445474 | 0.5500545945961142 | 0.2137749125541090 | T | T | T |
| 0.3598195307531017 | 0.0678135584258862 | 0.7233321099538311 | T | T | T |
| 0.3170498645998576 | 0.0532477117446631 | 0.9082798789814380 | T | T | T |
| 0.2022813195598092 | 0.0492755202547386 | 0.0083949161534938 | T | T | T |
| 0.0919553661023628 | 0.0689002942070154 | 0.9022927207218548 | T | T | T |
| 0.1043943124578123 | 0.0641187975343415 | 0.7051973034059287 | T | T | T |
| 0.2302723591374768 | 0.0500207714899207 | 0.7610472635282043 | T | T | T |
| 0.3611714641474310 | 0.8260032762342989 | 0.7541701297483192 | T | T | T |
| 0.3041569960460567 | 0.8577965728719420 | 0.9239229586750036 | T | T | T |
| 0.1893149823887948 | 0.8556740842638452 | 0.0210509255971410 | T | T | T |
| 0.0866107744048398 | 0.8333560040186218 | 0.9005789197814790 | T | T | T |
| 0.1034844799533360 | 0.8393188868138620 | 0.7051086188885785 | T | T | T |
| 0.2299023144538562 | 0.8469003478628474 | 0.7615717305729169 | T | T | T |
| 0.3156654447980453 | 0.9490853378333676 | 0.7797835928250204 | T | T | T |
| 0.0897205685660459 | 0.9518553193109518 | 0.8098468581374551 | T | T | T |
| 0.4327247627105714 | 0.1281113083266843 | 0.5842297510628992 | T | T | T |
| 0.4136514237449974 | 0.9968441435224331 | 0.5734270530647980 | T | T | T |
| 0.3948119967614213 | 0.8646182955610003 | 0.5709738533267618 | T | T | T |
| 0.1973378370977412 | 0.1360691798643976 | 0.6182157049770033 | T | T | T |
| 0.1896671108680769 | 0.0037705235808778 | 0.5844593586465846 | T | T | T |
| 0.1969485307282371 | 0.8698616285111580 | 0.5703363187214618 | T | T | T |
| 0.9881275691995807 | 0.0383712546926815 | 0.7862917435253538 | T | T | T |
| 0.9856682325275825 | 0.8703993249969224 | 0.7846566646999049 | T | T | T |
| 0.1410966308500668 | 0.9320413652234408 | 0.2247473583965182 | T | T | T |
| 0.1841974045495788 | 0.9448750261280265 | 0.4096870797850279 | T | T | T |
| 0.2981831289914317 | 0.9471215994268956 | 0.5124365366909512 | T | T | T |
| 0.4073750804487527 | 0.9302694178755323 | 0.4031791113197190 | T | T | T |
| 0.3968460120706409 | 0.9380963489229420 | 0.2068378710435572 | T | T | T |
| 0.2706553998281716 | 0.9519766167515673 | 0.2624685098122679 | T | T | T |
| 0.1410267319051761 | 0.1742267794406739 | 0.2503920808592580 | T | T | T |
| 0.1948158967091518 | 0.1446127982103793 | 0.4224669837410667 | T | T | T |
| 0.3105632817625331 | 0.1480262628641837 | 0.5162408016833856 | T | T | T |
| 0.4140881285783237 | 0.1693159763306546 | 0.3964062440024762 | T | T | T |
| 0.3963823354640237 | 0.1573080836802696 | 0.2011574318653226 | T | T | T |
| 0.2713466903463326 | 0.1493955593084408 | 0.2609718554747123 | T | T | T |
| 0.1825886284562840 | 0.0505041473794606 | 0.2834933692685205 | T | T | T |

**Structure files (CONTCAR) involved in this work:**

|                    |                    |                    |   |   |   |
|--------------------|--------------------|--------------------|---|---|---|
| 0.4168213349522600 | 0.0486812456011600 | 0.3140488339312015 | T | T | T |
| 0.0660944754692465 | 0.8719062442875258 | 0.0894126473246789 | T | T | T |
| 0.0867948926618305 | 0.0021624961338424 | 0.0731324077299973 | T | T | T |
| 0.1075486253601783 | 0.1338223557325073 | 0.0687755605907825 | T | T | T |
| 0.3040983505157681 | 0.8656487498773514 | 0.1203813765320698 | T | T | T |
| 0.3115408104679731 | 0.9970093739430392 | 0.0850362922878946 | T | T | T |
| 0.3010361654947889 | 0.1297086289798536 | 0.0674944507950358 | T | T | T |
| 0.5135142485206822 | 0.9567762255845369 | 0.2897090226334564 | T | T | T |
| 0.5159590121701740 | 0.1350788950871336 | 0.2798642748807436 | T | T | T |
| 0.6437489333660616 | 0.5593995701267607 | 0.2881728081977601 | T | T | T |
| 0.7056169942898639 | 0.5712589115617815 | 0.1147495258460842 | T | T | T |
| 0.7953549929821701 | 0.5597558660446855 | 0.9660762871990649 | T | T | T |
| 0.8930258549774501 | 0.5758154839578056 | 0.1019456629931144 | T | T | T |
| 0.8944739608496716 | 0.5485313268469466 | 0.3178862846727533 | T | T | T |
| 0.7689839259642063 | 0.5175068630541392 | 0.2701002766265963 | T | T | T |
| 0.6423923826284380 | 0.3322324505642791 | 0.2652532846349809 | T | T | T |
| 0.6917961738252748 | 0.3358945532411537 | 0.0847959272686241 | T | T | T |
| 0.8102913871259673 | 0.3514958357535248 | 0.9953181374071659 | T | T | T |
| 0.9162461615501206 | 0.3203895460659009 | 0.1096331227496321 | T | T | T |
| 0.9065333188647606 | 0.3458697349739265 | 0.3056351689001983 | T | T | T |
| 0.7701611487802976 | 0.3651959046405251 | 0.2401279082661396 | T | T | T |
| 0.6724861430309031 | 0.4491437760933810 | 0.1837652315166741 | T | T | T |
| 0.9218682830108827 | 0.4452905986953811 | 0.1706257206575176 | T | T | T |
| 0.5670772599709292 | 0.6264026483597450 | 0.4163350086566562 | T | T | T |
| 0.5824514703117973 | 0.4959083724069826 | 0.4407363040566214 | T | T | T |
| 0.5914803367881073 | 0.3627387677170437 | 0.4442041250449189 | T | T | T |
| 0.7941708891358470 | 0.6286440119580557 | 0.3731625169879008 | T | T | T |
| 0.8113332619349488 | 0.5103940292437715 | 0.4616096961762488 | T | T | T |
| 0.8174447571381759 | 0.3758343473190473 | 0.4455609161093828 | T | T | T |
| 0.0221057420113454 | 0.3642921854990193 | 0.2129450807266914 | T | T | T |
| 0.8564537983194547 | 0.4314846737843783 | 0.7875411277204687 | T | T | T |
| 0.7873739260182968 | 0.4315252725782379 | 0.6178536092802916 | T | T | T |
| 0.6994296976303976 | 0.4385418710726612 | 0.4675607013179890 | T | T | T |
| 0.6065752379964994 | 0.4311018402771850 | 0.6110794763273304 | T | T | T |
| 0.6037516239734017 | 0.4448588700655652 | 0.8091838780311320 | T | T | T |
| 0.7299696592625108 | 0.4770484200861309 | 0.7802122097094500 | T | T | T |
| 0.8615259237864290 | 0.6795452630150290 | 0.7527756730099956 | T | T | T |
| 0.8093037580133794 | 0.6445148201157740 | 0.5668814528005377 | T | T | T |
| 0.6878562023038779 | 0.6463717449417394 | 0.4903790618721892 | T | T | T |
| 0.5818779627353607 | 0.6693210145389238 | 0.6041777761761097 | T | T | T |
| 0.5962533653245854 | 0.6597430560399040 | 0.8022658092625083 | T | T | T |
| 0.7220039286214772 | 0.6436722695443994 | 0.7478813970030826 | T | T | T |
| 0.8279787285571735 | 0.5465483524301489 | 0.6965357603577303 | T | T | T |
| 0.5821646126453385 | 0.5497743063741464 | 0.6893363626049137 | T | T | T |
| 0.9322585520408881 | 0.3780471784428208 | 0.9295944264404795 | T | T | T |
| 0.9143103283575914 | 0.5106357865366689 | 0.9277318621235575 | T | T | T |
| 0.9002486888630732 | 0.6417632661234735 | 0.9359457726835146 | T | T | T |
| 0.6979078512851941 | 0.3728034689914746 | 0.8948849462250971 | T | T | T |
| 0.6766811705974384 | 0.4995486655622974 | 0.9558322218096346 | T | T | T |
| 0.6863955303838111 | 0.6336040784457554 | 0.9423971573791075 | T | T | T |
| 0.4916731581634329 | 0.4523457102433314 | 0.7098747497884709 | T | T | T |
| 0.4801022470748504 | 0.6334900140739557 | 0.7177214853413101 | T | T | T |
| 0.6437404177746365 | 0.9381804808715123 | 0.2893748700914895 | T | T | T |

**Structure files (CONTCAR) involved in this work:**

|                    |                    |                    |   |   |   |
|--------------------|--------------------|--------------------|---|---|---|
| 0.6987242841176584 | 0.9305665973754211 | 0.1106413797998886 | T | T | T |
| 0.8002636179810393 | 0.9490903140010789 | 0.9833470520988339 | T | T | T |
| 0.9002445949910414 | 0.9299769871618226 | 0.1129688852352548 | T | T | T |
| 0.8968617772677143 | 0.9454054730245551 | 0.3106273599613542 | T | T | T |
| 0.7713385588060757 | 0.9679882738499265 | 0.2658950036759576 | T | T | T |
| 0.6421803560897014 | 0.1708299568860385 | 0.2565713795831693 | T | T | T |
| 0.6985376057352758 | 0.1579328305054165 | 0.0818968157474096 | T | T | T |
| 0.8120035420138447 | 0.1474260094230224 | 0.9811882386663788 | T | T | T |
| 0.9179117163871185 | 0.1667987736649336 | 0.0953741938547464 | T | T | T |
| 0.8971024703155175 | 0.1617841481933343 | 0.2924050246167193 | T | T | T |
| 0.7715986331865643 | 0.1380053256995194 | 0.2455019942168497 | T | T | T |
| 0.6781081309764257 | 0.0501108534815291 | 0.1945958719774063 | T | T | T |
| 0.9184907189608662 | 0.0499724290115203 | 0.1892079190093197 | T | T | T |
| 0.5685826912197445 | 0.8744769916330746 | 0.4214445360644051 | T | T | T |
| 0.5841610473208132 | 0.0052561841957121 | 0.4404050466636376 | T | T | T |
| 0.5982579044288244 | 0.1374897773210876 | 0.4381475317735823 | T | T | T |
| 0.8052013369664228 | 0.8674955693271396 | 0.3903963655536234 | T | T | T |
| 0.8152597414555811 | 0.9935075279257711 | 0.4503478512738179 | T | T | T |
| 0.8119338538903823 | 0.1274013209782126 | 0.4349380361039968 | T | T | T |
| 0.0109130385535835 | 0.9550904563639004 | 0.2194148031279650 | T | T | T |
| 0.0168479353211257 | 0.1372845580470825 | 0.2174166032151748 | T | T | T |
| 0.8575521536962968 | 0.0547432736917560 | 0.7867353333102809 | T | T | T |
| 0.8015126392451629 | 0.0692799451591507 | 0.6103200094570673 | T | T | T |
| 0.7019148681772807 | 0.0582245697639867 | 0.4783721300196729 | T | T | T |
| 0.6017215904758727 | 0.0740517806151358 | 0.6090139400857149 | T | T | T |
| 0.6036448572096261 | 0.0540683353721470 | 0.8067286483122781 | T | T | T |
| 0.7288537129989306 | 0.0285947879061165 | 0.7646092132096887 | T | T | T |
| 0.8604087489513722 | 0.8322877642941431 | 0.7615059849085900 | T | T | T |
| 0.8060383268637656 | 0.8338457618363013 | 0.5841253073218432 | T | T | T |
| 0.6911644716289910 | 0.8513868558886847 | 0.4884337013452642 | T | T | T |
| 0.5873235944332144 | 0.8295646332060680 | 0.6072120756193089 | T | T | T |
| 0.6040293348009211 | 0.8499325947915601 | 0.8019162724820874 | T | T | T |
| 0.7298362256701794 | 0.8530741432390327 | 0.7439464974775755 | T | T | T |
| 0.8175745680180396 | 0.9467946424058616 | 0.6863465906100402 | T | T | T |
| 0.5817647862329367 | 0.9528956760247788 | 0.6790401353328548 | T | T | T |
| 0.9330571647750402 | 0.1287538566242954 | 0.9058296121305464 | T | T | T |
| 0.9191889381245752 | 0.9995987915839764 | 0.9454361322671991 | T | T | T |
| 0.9023696919874445 | 0.8673492288282691 | 0.9421323028926474 | T | T | T |
| 0.6967057925900163 | 0.1294598079018975 | 0.8879335033973431 | T | T | T |
| 0.6821415299062831 | 0.0026803352155444 | 0.9470066726544142 | T | T | T |
| 0.6990561705496839 | 0.8691905769830890 | 0.9372080252478683 | T | T | T |
| 0.4904126203343531 | 0.0479371080842246 | 0.7147246413419822 | T | T | T |
| 0.4847222023316934 | 0.8661832245708635 | 0.7202932465307148 | T | T | T |
| 0.3599620982119593 | 0.4377936970123346 | 0.7089836598111272 | T | T | T |
| 0.3096922326963009 | 0.4320682357273523 | 0.8909424549101032 | T | T | T |
| 0.2034401629057239 | 0.4533158933117712 | 0.0089939289880085 | T | T | T |
| 0.0974129594867143 | 0.4295961324463518 | 0.8936092900071025 | T | T | T |
| 0.1026499831531802 | 0.4477455321172442 | 0.6958898655113853 | T | T | T |
| 0.2301901045202194 | 0.4621195733805569 | 0.7416774519648131 | T | T | T |
| 0.3535578596857393 | 0.6711122795981739 | 0.7292149299811654 | T | T | T |
| 0.3041284264633918 | 0.6576108404866801 | 0.9087640999380603 | T | T | T |
| 0.1922295521719830 | 0.6471238186305480 | 0.0135935349243925 | T | T | T |
| 0.0909924461392723 | 0.6729653238758470 | 0.8910248360434188 | T | T | T |

**Structure files (CONTCAR) involved in this work:**

|                     |                    |                    |   |   |   |
|---------------------|--------------------|--------------------|---|---|---|
| 0.1015890762843021  | 0.6521044010250846 | 0.6945978525841372 | T | T | T |
| 0.2264014490893808  | 0.6393948530482387 | 0.7505014212708844 | T | T | T |
| 0.3212573904097960  | 0.5501976411121406 | 0.7965713124142642 | T | T | T |
| 0.0776504600848951  | 0.5499097170194555 | 0.8188376496970758 | T | T | T |
| 0.4339324644575657  | 0.3759256155391952 | 0.5738270624979098 | T | T | T |
| 0.4214768879463571  | 0.5077547499985771 | 0.5635020459922566 | T | T | T |
| 0.4038144129044368  | 0.6398573052434940 | 0.5529157529814818 | T | T | T |
| 0.1927220811018188  | 0.3672252672275985 | 0.6130809496129199 | T | T | T |
| 0.1864138797250167  | 0.4956912298994316 | 0.5600460280287066 | T | T | T |
| 0.1936288288267310  | 0.6296041653208826 | 0.5565078535714235 | T | T | T |
| 0.9865994410138229  | 0.4531391644440043 | 0.7864396083978653 | T | T | T |
| 0.9846260020541447  | 0.6415129164540008 | 0.7793012955852152 | T | T | T |
| 0.1442175061350160  | 0.5666840840591367 | 0.2142755263390073 | T | T | T |
| 0.2013214857946905  | 0.5609038814906283 | 0.3910431478298407 | T | T | T |
| 0.3021968979900764  | 0.5554655451095999 | 0.5229702167550485 | T | T | T |
| 0.3997747278666178  | 0.5696368068997884 | 0.3887764342614677 | T | T | T |
| 0.4008791181050433  | 0.5584853674802158 | 0.1910955875723555 | T | T | T |
| 0.2740970539956806  | 0.5381259416846231 | 0.2315688249458064 | T | T | T |
| 0.1459007781921624  | 0.3245330451452739 | 0.2422214486813765 | T | T | T |
| 0.1952641323968969  | 0.3546476918616968 | 0.4180979132960712 | T | T | T |
| 0.3091978396354769  | 0.3546766471900787 | 0.5179688019582706 | T | T | T |
| 0.4084035077514575  | 0.3304582778798175 | 0.3904073033495744 | T | T | T |
| 0.3979772821523959  | 0.3429809918879773 | 0.1942677975297623 | T | T | T |
| 0.2744794078664851  | 0.3541918651350733 | 0.2586001486113766 | T | T | T |
| 0.1812895045663433  | 0.4492462199474812 | 0.2823336555827746 | T | T | T |
| 0.4155446493560266  | 0.4510049041104229 | 0.3081199190016281 | T | T | T |
| 0.0691896340647997  | 0.6255519094025944 | 0.0745223489900130 | T | T | T |
| 0.0844253978596571  | 0.4933605407887054 | 0.0673259066949028 | T | T | T |
| 0.1103461784661653  | 0.3628286246185192 | 0.0608258687952058 | T | T | T |
| 0.3097721486903277  | 0.6334338349377685 | 0.1029667931186078 | T | T | T |
| 0.3214640558895898  | 0.5041628166181842 | 0.0536462682077177 | T | T | T |
| 0.3007894252190508  | 0.3707171891302035 | 0.0643680580905720 | T | T | T |
| 0.5127896132310543  | 0.5426719940996508 | 0.2876967501656434 | T | T | T |
| 0.5148130556944557  | 0.3642005252150237 | 0.2808352242452963 | T | T | T |
| 0.4407926925813087  | 0.7513010350827580 | 0.6422831286953213 | T | T | T |
| 0.1898315199187035  | 0.7474834960808147 | 0.6424112072890511 | T | T | T |
| 0.2727031861698967  | 0.7521122341567146 | 0.0384343116324202 | T | T | T |
| 0.1094877115359105  | 0.7501448528512465 | 0.0495351011351915 | T | T | T |
| 0.0649683282617362  | 0.2492880837155054 | 0.1338628636876889 | T | T | T |
| 0.3082225996118861  | 0.2502666940278606 | 0.1419690085767846 | T | T | T |
| 0.2255757496402912  | 0.2508608726819149 | 0.5344416064695374 | T | T | T |
| 0.3921168192593694  | 0.2516199991588099 | 0.5472024860839888 | T | T | T |
| 0.5589479149173687  | 0.2497241917676231 | 0.3571408646503004 | T | T | T |
| 0.8029229051626910  | 0.2472656138637364 | 0.3533002235095726 | T | T | T |
| 0.7297063035441853  | 0.2500289664877471 | 0.9447021473890209 | T | T | T |
| 0.8935883684804365  | 0.2515143390800021 | 0.9466403415065655 | T | T | T |
| 0.9447938705814123  | 0.7550691487532131 | 0.8624079650837785 | T | T | T |
| 0.6862552750656553  | 0.7509473053261362 | 0.8562499332750998 | T | T | T |
| 0.7703630042314693  | 0.7469911121948709 | 0.4456933731784827 | T | T | T |
| 0.6066353905716021  | 0.7499726811748426 | 0.4525341974693129 | T | T | T |
| 0.9335377177461233  | 0.4604863899167289 | 0.5529053180479787 | T | T | T |
| -0.0446276154903425 | 0.6143496778747495 | 0.5861613679305137 | T | T | T |
| 0.9230497050024438  | 0.5285650604279030 | 0.1983557326772651 | T | T | T |

**Structure files (CONTCAR) involved in this work:**

|                     |                    |                    |   |   |   |
|---------------------|--------------------|--------------------|---|---|---|
| 0.8203669412429695  | 0.3302903340017896 | 0.3307294273469515 | T | T | T |
| 0.7996206294654243  | 0.6331336538846158 | 0.6963501074104396 | T | T | T |
| 0.9293192887628811  | 0.3735645488171192 | 0.4694296509769432 | T | T | T |
| 0.8828224969765275  | 0.5449585456032965 | 0.5685764874191209 | T | T | T |
| 0.0444489374792830  | 0.5349039616644216 | 0.4296159169770360 | T | T | T |
| 0.0461225396234978  | 0.6015515838059999 | 0.4136621458348543 | T | T | T |
| 0.9591036924381370  | 0.4498216646683188 | 0.6133059439346962 | T | T | T |
| 0.0897036683016506  | 0.5055610438460796 | 0.4421299057108750 | T | T | T |
| -0.0024475437900609 | 0.5069693116331894 | 0.4328969457260283 | T | T | T |
| 0.0001766752185303  | 0.6302209847342894 | 0.4016053029872453 | T | T | T |
| 0.0265622522964004  | 0.5562560164140149 | 0.2860926738731876 | T | T | T |
| 0.0930309606298795  | 0.6294256943288190 | 0.4119265987012636 | T | T | T |
| -0.0373474318493473 | 0.6290005809818595 | 0.6567975694356106 | T | T | T |
| -0.0011775074624634 | 0.5997284360332437 | 0.5600936480719672 | T | T | T |

**Figure 7(b) TS1**

Si O Al Zn C H

1.0000000000000000

20.0219999999999985 0.0000000000000000 0.0000000000000000

0.0000000000000000 19.8990000000000009 0.0000000000000000

0.0000000000000000 0.0000000000000000 13.3829999999999991

93 194 3 2 2 8

Selective dynamics

Direct

|                    |                    |                    |   |   |   |
|--------------------|--------------------|--------------------|---|---|---|
| 0.4230116472795291 | 0.0596417915470523 | 0.6485472724054061 | T | T | T |
| 0.3053620051790783 | 0.0316214035365329 | 0.7918577594079081 | T | T | T |
| 0.2828609424286840 | 0.0550914337097236 | 0.0171884798360987 | T | T | T |
| 0.1237745384929585 | 0.0625226730806294 | 0.0125567560668352 | T | T | T |
| 0.0681829931183086 | 0.0309653069970342 | 0.8014596023097774 | T | T | T |
| 0.1807970046619449 | 0.0651063930940855 | 0.6656142631396234 | T | T | T |
| 0.4191551701147482 | 0.8270573651905676 | 0.6692716699095713 | T | T | T |
| 0.3006337936466509 | 0.8728081935172028 | 0.7995318531187450 | T | T | T |
| 0.2678333334802185 | 0.8308681890667201 | 0.0189518258457579 | T | T | T |
| 0.1118727291905999 | 0.8271627595589545 | 0.0134214170165967 | T | T | T |
| 0.0660945800755922 | 0.8741825704233082 | 0.7992574506978124 | T | T | T |
| 0.1786031502539794 | 0.8280848078094911 | 0.6644315633653984 | T | T | T |
| 0.0759486715583015 | 0.9412545323803392 | 0.1501686838829568 | T | T | T |
| 0.1957108481564938 | 0.9692256631268967 | 0.2909702451138066 | T | T | T |
| 0.2170876354523226 | 0.9433680431180800 | 0.5171455758411093 | T | T | T |
| 0.3774684911267693 | 0.9347721840947436 | 0.5141842104817625 | T | T | T |
| 0.4335396926008299 | 0.9685701423069674 | 0.3019841216452603 | T | T | T |
| 0.3208545132544830 | 0.9343313999657161 | 0.1653225424521353 | T | T | T |
| 0.0825388407359351 | 0.1717337441518878 | 0.1664819018199567 | T | T | T |
| 0.1990965584498090 | 0.1279579139446404 | 0.3004855019074598 | T | T | T |
| 0.2318500549560894 | 0.1689755745161703 | 0.5182191381783708 | T | T | T |
| 0.3876587358208051 | 0.1733871803221630 | 0.5088791635206392 | T | T | T |
| 0.4346966322461980 | 0.1265069239517303 | 0.2950107080881563 | T | T | T |
| 0.3192346791953088 | 0.1722636012855642 | 0.1642975071381824 | T | T | T |
| 0.5768135840816778 | 0.5550338675236685 | 0.3603757301353531 | T | T | T |
| 0.6895670643013568 | 0.5264989463304921 | 0.2070553993406165 | T | T | T |
| 0.7135654941106605 | 0.5666532055717715 | 0.9918286007923686 | T | T | T |
| 0.8725558501942635 | 0.5730232880706423 | 0.9850708828110232 | T | T | T |
| 0.8109723127999934 | 0.5510586933343763 | 0.3442080829034778 | T | T | T |
| 0.5726848120303413 | 0.3279412910235666 | 0.3316810452544411 | T | T | T |



**Structure files (CONTCAR) involved in this work:**

|                    |                    |                    |   |   |   |
|--------------------|--------------------|--------------------|---|---|---|
| 0.6911199345887271 | 0.3728621510652627 | 0.1917477259219346 | T | T | T |
| 0.7307178869094799 | 0.3288841951689355 | 0.9783013161716343 | T | T | T |
| 0.8857513721372978 | 0.3260219201045300 | 0.9917123120329898 | T | T | T |
| 0.9417569878753633 | 0.3738587544756128 | 0.1895972688598147 | T | T | T |
| 0.9193166864777140 | 0.4461891163361474 | 0.8585011728047151 | T | T | T |
| 0.8013271229524329 | 0.4753308926959915 | 0.7175344121329715 | T | T | T |
| 0.7771761022109991 | 0.4379360628562903 | 0.4945355067950404 | T | T | T |
| 0.6198114986864568 | 0.4277355557157831 | 0.4904765624890026 | T | T | T |
| 0.5704843521099384 | 0.4685512246261793 | 0.7010985400868303 | T | T | T |
| 0.6779394420782042 | 0.4493560369883912 | 0.8556033868846419 | T | T | T |
| 0.9201718909371296 | 0.6784555168204632 | 0.8276794475343747 | T | T | T |
| 0.7667677099067522 | 0.6686884718988361 | 0.4628376623172044 | T | T | T |
| 0.6119811990339096 | 0.6735601642051647 | 0.4885009518085298 | T | T | T |
| 0.5620690349351785 | 0.6267057105377130 | 0.6989108280398114 | T | T | T |
| 0.6751402589453311 | 0.6732374457689099 | 0.8306180351282683 | T | T | T |
| 0.5781028539901989 | 0.9458250891654492 | 0.3590193145979673 | T | T | T |
| 0.6981165285668658 | 0.9738313509973029 | 0.2149419339650859 | T | T | T |
| 0.7194450459362328 | 0.9382474960924905 | 0.9937546151122787 | T | T | T |
| 0.8793097693707296 | 0.9345417661045158 | 0.9954651357394928 | T | T | T |
| 0.9308337576560305 | 0.9707124368389770 | 0.2052918124840132 | T | T | T |
| 0.8216842579216426 | 0.9465503668491332 | 0.3550710640384098 | T | T | T |
| 0.5771879797670377 | 0.1731697060438883 | 0.3304000105288671 | T | T | T |
| 0.6977668171195948 | 0.1315389187267768 | 0.1945760099173219 | T | T | T |
| 0.7317705172819422 | 0.1724235636335648 | 0.9731457185756798 | T | T | T |
| 0.8865976246645986 | 0.1738300875071525 | 0.9817292406103063 | T | T | T |
| 0.9354734446471974 | 0.1287285547293463 | 0.1957904965653141 | T | T | T |
| 0.8205870860286532 | 0.1731852934020850 | 0.3307762797718507 | T | T | T |
| 0.9231989713136524 | 0.0538040125022727 | 0.8559579371774433 | T | T | T |
| 0.8012922169737243 | 0.0254898773391334 | 0.7100039604599938 | T | T | T |
| 0.7816587031914524 | 0.0664567397238821 | 0.4920643867872382 | T | T | T |
| 0.6212031186912171 | 0.0704970604301987 | 0.4910178399530832 | T | T | T |
| 0.5685797653147112 | 0.0322010624065665 | 0.6998492627304568 | T | T | T |
| 0.6781791651478000 | 0.0542645903504517 | 0.8510211478767681 | T | T | T |
| 0.9227688902974162 | 0.8308424535204528 | 0.8371980073585346 | T | T | T |
| 0.8019278315220346 | 0.8675581829862038 | 0.6944914995728383 | T | T | T |
| 0.7683286038441972 | 0.8260705649753214 | 0.4769223760635504 | T | T | T |
| 0.6134971240423311 | 0.8269290501946522 | 0.4899558451430867 | T | T | T |
| 0.5636109542407156 | 0.8750946976887684 | 0.6985062803941913 | T | T | T |
| 0.6780781109451562 | 0.8320577417329919 | 0.8340624610137440 | T | T | T |
| 0.4237962868039227 | 0.4412114508510564 | 0.6469413320913695 | T | T | T |
| 0.3050290063828974 | 0.4683993912722298 | 0.7893726430536485 | T | T | T |
| 0.2792720750037758 | 0.4461059519855395 | 0.0164024528500972 | T | T | T |
| 0.1213186727978342 | 0.4372498878251332 | 0.0175074958770042 | T | T | T |
| 0.0647145452016398 | 0.4681511194649418 | 0.8043026495974714 | T | T | T |
| 0.1775485872252030 | 0.4348614743671723 | 0.6636652086907626 | T | T | T |
| 0.4170451114413462 | 0.6729410888994311 | 0.6683326439072850 | T | T | T |
| 0.3000678181435012 | 0.6270055812707725 | 0.7993314901498764 | T | T | T |
| 0.2687712366723454 | 0.6694714276149152 | 0.0198213531888593 | T | T | T |
| 0.1141301437134151 | 0.6735163648133183 | 0.0119639653815928 | T | T | T |
| 0.0659379013120135 | 0.6267650795827721 | 0.8001899556876422 | T | T | T |
| 0.1780045929294256 | 0.6705346694560900 | 0.6628390232805601 | T | T | T |
| 0.0782479859728776 | 0.5598165534313103 | 0.1493260788564744 | T | T | T |
| 0.1973860624285635 | 0.5285043968550912 | 0.2888138579032360 | T | T | T |

**Structure files (CONTCAR) involved in this work:**

|                    |                    |                    |   |   |   |
|--------------------|--------------------|--------------------|---|---|---|
| 0.2146375432947598 | 0.5551169406903781 | 0.5159502888822334 | T | T | T |
| 0.3745227823089201 | 0.5653010998654404 | 0.5152144293177462 | T | T | T |
| 0.4307342112299205 | 0.5305532112963142 | 0.3045997106731352 | T | T | T |
| 0.3225343432655264 | 0.5645983678566519 | 0.1627194890803823 | T | T | T |
| 0.0857144079694369 | 0.3243797648803167 | 0.1653901697296258 | T | T | T |
| 0.1994795848037191 | 0.3703384502313641 | 0.3006945086513950 | T | T | T |
| 0.2304583705674552 | 0.3303111182634230 | 0.5192461313262150 | T | T | T |
| 0.3856677053324389 | 0.3273259586771853 | 0.5075991479575425 | T | T | T |
| 0.4304282645749223 | 0.3737602203704283 | 0.2937704146616401 | T | T | T |
| 0.3174936943658527 | 0.3290006759487921 | 0.1623672144879006 | T | T | T |
| 0.0115390690316196 | 0.5580117267440108 | 0.2279681468735754 | T | T | T |
| 0.3596154165976516 | 0.0702797442717356 | 0.7226740867760411 | T | T | T |
| 0.3177311739779790 | 0.0513767512109038 | 0.9078058365199109 | T | T | T |
| 0.2027981632840985 | 0.0457402698861532 | 0.0063280760524604 | T | T | T |
| 0.0926121693416275 | 0.0695929566289103 | 0.9016397862022202 | T | T | T |
| 0.1040688267159937 | 0.0642135023297687 | 0.7045141683109574 | T | T | T |
| 0.2301121140799018 | 0.0541603833993546 | 0.7610442599769421 | T | T | T |
| 0.3599129075253070 | 0.8278212088363849 | 0.7521219523523464 | T | T | T |
| 0.3007921775219045 | 0.8627613661669021 | 0.9192581274023283 | T | T | T |
| 0.1892055780903703 | 0.8513884558235075 | 0.0232263899243701 | T | T | T |
| 0.0882926959884811 | 0.8321611466432353 | 0.8979776733630835 | T | T | T |
| 0.1021250637247867 | 0.8407243498023842 | 0.7019032210557210 | T | T | T |
| 0.2287362486599335 | 0.8486879905835495 | 0.7553263430746616 | T | T | T |
| 0.3139589831105526 | 0.9512117647054078 | 0.7727495680381365 | T | T | T |
| 0.0893886176614743 | 0.9519846076448540 | 0.8105101125108283 | T | T | T |
| 0.4332807274427840 | 0.1267244338128585 | 0.5809182431446478 | T | T | T |
| 0.4123176585947931 | 0.9955966681574345 | 0.5753135859816769 | T | T | T |
| 0.3936162535007521 | 0.8634153607388227 | 0.5675884930221652 | T | T | T |
| 0.1955360618125965 | 0.1380463221724706 | 0.6160708344873554 | T | T | T |
| 0.1910502422846932 | 0.0051649643693200 | 0.5851875071103845 | T | T | T |
| 0.1941398441174284 | 0.8717640919053151 | 0.5648037321060445 | T | T | T |
| 0.9882326357187663 | 0.0389025728087317 | 0.7868478814789145 | T | T | T |
| 0.9855528456040131 | 0.8701835681878923 | 0.7856443851211220 | T | T | T |
| 0.1399203274414616 | 0.9314399111163441 | 0.2233515206197376 | T | T | T |
| 0.1836683883194456 | 0.9501518508468234 | 0.4072015883716001 | T | T | T |
| 0.2975960215238133 | 0.9470170774675878 | 0.5092220193271030 | T | T | T |
| 0.4079769273987047 | 0.9313700701084735 | 0.4026803823955594 | T | T | T |
| 0.3970884058029360 | 0.9346365231293237 | 0.2059629004086428 | T | T | T |
| 0.2702138041332766 | 0.9449648533805322 | 0.2593333168890828 | T | T | T |
| 0.1388361780054224 | 0.1718185063368920 | 0.2536547331910311 | T | T | T |
| 0.1967071423664787 | 0.1364572364668875 | 0.4204902724015748 | T | T | T |
| 0.3103846923909350 | 0.1484760756337199 | 0.5177197216522674 | T | T | T |
| 0.4124298250826662 | 0.1680111645110964 | 0.3940671866590791 | T | T | T |
| 0.3960508866613075 | 0.1580691149531572 | 0.1985116949512854 | T | T | T |
| 0.2707709927063910 | 0.1543917321017757 | 0.2587519485333106 | T | T | T |
| 0.1884748728762152 | 0.0495340974486039 | 0.2708291592255578 | T | T | T |
| 0.4141321682812786 | 0.0479621824811257 | 0.3082420583016325 | T | T | T |
| 0.0653055371120066 | 0.8726635389101888 | 0.0856412381509588 | T | T | T |
| 0.0861137452606368 | 0.0026719948954284 | 0.0721290234190804 | T | T | T |
| 0.1114161199513898 | 0.1333327210680097 | 0.0687945514982554 | T | T | T |
| 0.3063729755613699 | 0.8615212712100926 | 0.1149123880117354 | T | T | T |
| 0.3119115444723343 | 0.9942971619608343 | 0.0846084313908107 | T | T | T |
| 0.3000887601141001 | 0.1272803618825923 | 0.0673622714278860 | T | T | T |

**Structure files (CONTCAR) involved in this work:**

|                    |                    |                    |   |   |   |
|--------------------|--------------------|--------------------|---|---|---|
| 0.5133088921052991 | 0.9581342762386765 | 0.2883364728326336 | T | T | T |
| 0.5148929102974108 | 0.1329316605394895 | 0.2788415222535506 | T | T | T |
| 0.6392005062466066 | 0.5627347232516346 | 0.2849420699157005 | T | T | T |
| 0.6940359997788889 | 0.5740983778894705 | 0.1090009972267491 | T | T | T |
| 0.7933088009070872 | 0.5554385555680414 | 0.9771171655710577 | T | T | T |
| 0.8971445279650633 | 0.5823733030020988 | 0.0983638523408463 | T | T | T |
| 0.8869721995028803 | 0.5393430673222867 | 0.3100161015362939 | T | T | T |
| 0.7629677451842338 | 0.5212579894491329 | 0.2580251627154576 | T | T | T |
| 0.6372112022655861 | 0.3326876934066313 | 0.2604505344085026 | T | T | T |
| 0.6889246925373860 | 0.3391493262092473 | 0.0806941449112883 | T | T | T |
| 0.8084004828427174 | 0.3509037318814211 | 0.9948513379682189 | T | T | T |
| 0.9151589212913411 | 0.3215440642246430 | 0.1048050542048134 | T | T | T |
| 0.9032137310238866 | 0.3576269101180687 | 0.2949475123067628 | T | T | T |
| 0.7640897524925025 | 0.3683035910602192 | 0.2400387962718248 | T | T | T |
| 0.6651814910548085 | 0.4508016375831461 | 0.1810980800322590 | T | T | T |
| 0.9308316748159322 | 0.4495402194439072 | 0.1532997112703584 | T | T | T |
| 0.5655993305468013 | 0.6259556125054587 | 0.4182891116645221 | T | T | T |
| 0.5894924465936640 | 0.4961925397731536 | 0.4423918824135391 | T | T | T |
| 0.5852555908182333 | 0.3622115254609720 | 0.4406741852302191 | T | T | T |
| 0.7956906130050050 | 0.6304999727595113 | 0.3642279327866177 | T | T | T |
| 0.7965047649433393 | 0.5135190463741131 | 0.4527023115970284 | T | T | T |
| 0.8246346838449362 | 0.3826127452735786 | 0.4396989494446588 | T | T | T |
| 0.0210918663415089 | 0.3615927547881467 | 0.2113534082758991 | T | T | T |
| 0.8550100727143658 | 0.4352137743753083 | 0.7860269127339415 | T | T | T |
| 0.7901851406852518 | 0.4347058217010540 | 0.6135930541972111 | T | T | T |
| 0.6995678834284246 | 0.4233343853497676 | 0.4683867790934400 | T | T | T |
| 0.6050029978783642 | 0.4273789970415498 | 0.6094475063108675 | T | T | T |
| 0.6043364105058832 | 0.4451457350607986 | 0.8052734767772828 | T | T | T |
| 0.7300197827140358 | 0.4805407309925624 | 0.7741099343299701 | T | T | T |
| 0.8700509632629910 | 0.6822153103290881 | 0.7335309878518708 | T | T | T |
| 0.8113229738704729 | 0.6451851684555350 | 0.5588052915617882 | T | T | T |
| 0.6891601964076388 | 0.6477965616220327 | 0.4832100544841989 | T | T | T |
| 0.5855889305054468 | 0.6701924399284649 | 0.6025920371567369 | T | T | T |
| 0.5978477611015967 | 0.6567908921163789 | 0.7980511429812513 | T | T | T |
| 0.7252730741880442 | 0.6516745018786362 | 0.7422733780574443 | T | T | T |
| 0.8290633864506236 | 0.5509814917181558 | 0.6930619298747488 | T | T | T |
| 0.5817655288912598 | 0.5483652133779668 | 0.6816961516215415 | T | T | T |
| 0.9292360177336314 | 0.3785183623572094 | 0.9250688118893607 | T | T | T |
| 0.9125656680459944 | 0.5120679719771218 | 0.9289446992903002 | T | T | T |
| 0.8869582222914407 | 0.6425109223612958 | 0.9238636508786044 | T | T | T |
| 0.6995778943227952 | 0.3742623913480628 | 0.8889464497031198 | T | T | T |
| 0.6749927059991297 | 0.5000615287113396 | 0.9504080597545230 | T | T | T |
| 0.6898485935661655 | 0.6341370230335359 | 0.9350106152465510 | T | T | T |
| 0.4914680572788112 | 0.4512823396469952 | 0.7109897701738226 | T | T | T |
| 0.4812849477378077 | 0.6326126695414146 | 0.7117663919810927 | T | T | T |
| 0.6436685699912545 | 0.9399700358181224 | 0.2889096139007024 | T | T | T |
| 0.6987216556331100 | 0.9324131292893837 | 0.1104954740483367 | T | T | T |
| 0.7998412795758257 | 0.9466280536356375 | 0.9810523260208953 | T | T | T |
| 0.8988042821858995 | 0.9285287318048039 | 0.1126816525912457 | T | T | T |
| 0.8970613299479290 | 0.9480054481273298 | 0.3101891093550002 | T | T | T |
| 0.7714690133506937 | 0.9687477725307779 | 0.2656577927310610 | T | T | T |
| 0.6404924397780665 | 0.1720875905003818 | 0.2553662843986705 | T | T | T |
| 0.6971013983232592 | 0.1590592372220949 | 0.0807369365895678 | T | T | T |

**Structure files (CONTCAR) involved in this work:**

|                    |                    |                    |   |   |   |
|--------------------|--------------------|--------------------|---|---|---|
| 0.8094490425576030 | 0.1479626500760304 | 0.9777172352263099 | T | T | T |
| 0.9135948311266980 | 0.1686834808043230 | 0.0954497935278555 | T | T | T |
| 0.8972149815142823 | 0.1588406098314975 | 0.2926055550896560 | T | T | T |
| 0.7706504757003332 | 0.1426349406193003 | 0.2446750889122433 | T | T | T |
| 0.6790976956033062 | 0.0519387360625020 | 0.1953611226958219 | T | T | T |
| 0.9177687717268490 | 0.0496375049047383 | 0.1826344798051422 | T | T | T |
| 0.5685084460146118 | 0.8757738173430791 | 0.4199954748297174 | T | T | T |
| 0.5836571290367798 | 0.0069303203492908 | 0.4392228179681544 | T | T | T |
| 0.5970440950764012 | 0.1394014920970954 | 0.4370811758579868 | T | T | T |
| 0.8066307358686711 | 0.8707833666872243 | 0.3936959483842465 | T | T | T |
| 0.8156823000701937 | 0.9982316843141995 | 0.4483093676407075 | T | T | T |
| 0.8093441779083553 | 0.1324068264680505 | 0.4353925617239716 | T | T | T |
| 0.0100819925506108 | 0.9548095166558295 | 0.2170879233262463 | T | T | T |
| 0.0157987574200150 | 0.1366373128817352 | 0.2110841873842986 | T | T | T |
| 0.8577370856511214 | 0.0536855099007988 | 0.7854845327232550 | T | T | T |
| 0.8011422716610063 | 0.0714631526471666 | 0.6098073261001256 | T | T | T |
| 0.7010857715429758 | 0.0606462592085747 | 0.4781584941885482 | T | T | T |
| 0.6006503970733886 | 0.0754142214144163 | 0.6082579316754099 | T | T | T |
| 0.6031650543534439 | 0.0519376908123966 | 0.8053729693211545 | T | T | T |
| 0.7288050216566355 | 0.0297337676597426 | 0.7634834870684977 | T | T | T |
| 0.8600481185355261 | 0.8336990095340711 | 0.7614908239645268 | T | T | T |
| 0.8043549760640815 | 0.8320843325210657 | 0.5854049788817847 | T | T | T |
| 0.6911610435787244 | 0.8514974965620254 | 0.4857796615490653 | T | T | T |
| 0.5875441344475220 | 0.8293040635453338 | 0.6047101538129634 | T | T | T |
| 0.6026588655605429 | 0.8522057347395893 | 0.7992353585411492 | T | T | T |
| 0.7294578421987356 | 0.8547642567110634 | 0.7455690065154461 | T | T | T |
| 0.8161340651025195 | 0.9474487043202805 | 0.6820482628752196 | T | T | T |
| 0.5796588867459127 | 0.9532014403023977 | 0.6734633137972706 | T | T | T |
| 0.9315283983668154 | 0.1271616821457120 | 0.9080255771109910 | T | T | T |
| 0.9187432121481623 | 0.9969918249642985 | 0.9435153262872062 | T | T | T |
| 0.9024278948496917 | 0.8646309190908503 | 0.9432321060734932 | T | T | T |
| 0.6937749342622972 | 0.1305172616647648 | 0.8861514892117291 | T | T | T |
| 0.6832528935620823 | 0.0041704617270063 | 0.9466530591554454 | T | T | T |
| 0.6956006982309403 | 0.8702894037710811 | 0.9377878987063518 | T | T | T |
| 0.4896732797878343 | 0.0481570310667043 | 0.7145658444576318 | T | T | T |
| 0.4838394377392210 | 0.8649691096482830 | 0.7161370173132793 | T | T | T |
| 0.3612914990372305 | 0.4301910839751176 | 0.7231942165346681 | T | T | T |
| 0.3116783066722829 | 0.4463631183863032 | 0.9054377053860310 | T | T | T |
| 0.1990438733965929 | 0.4608577052416939 | 0.0128908716438402 | T | T | T |
| 0.0901015592559333 | 0.4328257580741729 | 0.9067472622964666 | T | T | T |
| 0.1024730365711588 | 0.4348234311254159 | 0.7090482671669979 | T | T | T |
| 0.2302379723003657 | 0.4481563880490914 | 0.7536767247166057 | T | T | T |
| 0.3584121291961214 | 0.6734210046651219 | 0.7524921966991587 | T | T | T |
| 0.2996489598162529 | 0.6372777869799423 | 0.9189602655689366 | T | T | T |
| 0.1903953245346543 | 0.6480157436605002 | 0.0272370535672657 | T | T | T |
| 0.0939814016912662 | 0.6684327596158754 | 0.8952640071467693 | T | T | T |
| 0.1007089085633260 | 0.6562264077113367 | 0.6982077405786123 | T | T | T |
| 0.2274742452971752 | 0.6481392365964458 | 0.7535941910682629 | T | T | T |
| 0.3156011031790020 | 0.5488393509876648 | 0.7737776375573404 | T | T | T |
| 0.0838293643785081 | 0.5477525118903523 | 0.8114484409990882 | T | T | T |
| 0.4324853186427919 | 0.3755318280878545 | 0.5757467073503462 | T | T | T |
| 0.4127363658632041 | 0.5064597636671521 | 0.5760047238512431 | T | T | T |
| 0.3879591627226603 | 0.6375482768455942 | 0.5675935020085303 | T | T | T |

**Structure files (CONTCAR) involved in this work:**

|                    |                    |                    |   |   |   |
|--------------------|--------------------|--------------------|---|---|---|
| 0.1915888338463464 | 0.3615023954928086 | 0.6149637289464230 | T | T | T |
| 0.1831038844268234 | 0.4940852638996549 | 0.5804237136218033 | T | T | T |
| 0.1924381867661488 | 0.6273757461920942 | 0.5620455968548695 | T | T | T |
| 0.9854744642905650 | 0.4564347604118612 | 0.7888756456918437 | T | T | T |
| 0.9861041566693105 | 0.6363403068148569 | 0.7891429279958472 | T | T | T |
| 0.1433301574688728 | 0.5685303005166691 | 0.2193630492197557 | T | T | T |
| 0.1839168497400039 | 0.5505332360353717 | 0.4035160201907351 | T | T | T |
| 0.2950776252147160 | 0.5483405552843930 | 0.5134868987435843 | T | T | T |
| 0.4027892748620340 | 0.5697301830175794 | 0.4023405480085600 | T | T | T |
| 0.3981860551223654 | 0.5643236751298920 | 0.2051727501190123 | T | T | T |
| 0.2719475514353776 | 0.5504892021801310 | 0.2563006734547967 | T | T | T |
| 0.1428588970161399 | 0.3231860048696951 | 0.2514100159790726 | T | T | T |
| 0.1962868357305010 | 0.3628084316576543 | 0.4205317498197763 | T | T | T |
| 0.3086130970804961 | 0.3521219791847304 | 0.5218169025994864 | T | T | T |
| 0.4063930308753868 | 0.3306087176107472 | 0.3905657860501693 | T | T | T |
| 0.3943765538259253 | 0.3455301833286532 | 0.1928972445075105 | T | T | T |
| 0.2723893657808397 | 0.3475486769020720 | 0.2603236053029589 | T | T | T |
| 0.1850489164339830 | 0.4487039262481833 | 0.2711372135358723 | T | T | T |
| 0.4092887373762981 | 0.4518004111602412 | 0.3118440651262092 | T | T | T |
| 0.0665274849936799 | 0.6252602521224822 | 0.0800914158224772 | T | T | T |
| 0.0787464252596462 | 0.4920708090617842 | 0.0839825563909225 | T | T | T |
| 0.1146455904034946 | 0.3638129384815698 | 0.0679010809307017 | T | T | T |
| 0.3077507550269726 | 0.6381713712012387 | 0.1151682139547653 | T | T | T |
| 0.3140482902324831 | 0.5059804102726400 | 0.0797004266049861 | T | T | T |
| 0.2936581893662630 | 0.3733734562640152 | 0.0669108805518161 | T | T | T |
| 0.5107767796201151 | 0.5377622417919933 | 0.2953386950256166 | T | T | T |
| 0.5102579034810965 | 0.3662866300324847 | 0.2778717280676442 | T | T | T |
| 0.4372316544814449 | 0.7497538276963918 | 0.6419750208935192 | T | T | T |
| 0.1879582702444826 | 0.7492003540485823 | 0.6357914367807017 | T | T | T |
| 0.2764645187297351 | 0.7500677754825311 | 0.0193196393984884 | T | T | T |
| 0.1045841314822603 | 0.7497388684326790 | 0.0505264100911341 | T | T | T |
| 0.0675445532577933 | 0.2484520473623695 | 0.1324064861302682 | T | T | T |
| 0.3096351517801853 | 0.2504808368353464 | 0.1326388074625172 | T | T | T |
| 0.2224199846453050 | 0.2496824598724766 | 0.5190933090021747 | T | T | T |
| 0.3940348906865683 | 0.2506277618782150 | 0.5461948199069583 | T | T | T |
| 0.5540873351230957 | 0.2498442348815003 | 0.3516150942248852 | T | T | T |
| 0.8083435257158991 | 0.2512703170547833 | 0.3490975785646210 | T | T | T |
| 0.7264660628071828 | 0.2510150634348648 | 0.9431101713019188 | T | T | T |
| 0.8916628421249512 | 0.2511872170015922 | 0.9433291669305420 | T | T | T |
| 0.9445634403759954 | 0.7536202480747055 | 0.8590439692167017 | T | T | T |
| 0.6827580802752553 | 0.7526825565125448 | 0.8555014940624300 | T | T | T |
| 0.7721837033674946 | 0.7485341312848843 | 0.4410531167295753 | T | T | T |
| 0.6064989629981312 | 0.7504858547516411 | 0.4489076136009267 | T | T | T |
| 0.9325043450558911 | 0.4876269348801763 | 0.5214022851141302 | T | T | T |
| 0.9510758788580954 | 0.6480378661107511 | 0.5725947112567538 | T | T | T |
| 0.9230662450810915 | 0.5305172690153066 | 0.1932076571846673 | T | T | T |
| 0.8189266820090392 | 0.3350359509298624 | 0.3253599095912261 | T | T | T |
| 0.8013740027323782 | 0.6365308286937512 | 0.6902612701053815 | T | T | T |
| 0.9264588275212543 | 0.4070153127621574 | 0.4275326182269286 | T | T | T |
| 0.8888613134391739 | 0.5641726019889467 | 0.5635732263863726 | T | T | T |
| 0.0261869077572510 | 0.4145774275540089 | 0.4610002113826177 | T | T | T |
| 0.0148417621855353 | 0.6008532967341783 | 0.3190669914415065 | T | T | T |
| 0.9905493013095314 | 0.4611573351955521 | 0.5076314018834431 | T | T | T |

**Structure files (CONTCAR) involved in this work:**

|                    |                    |                    |   |   |   |
|--------------------|--------------------|--------------------|---|---|---|
| 0.0595134505186471 | 0.4336690282121025 | 0.4023015910729143 | T | T | T |
| 0.0519671571270144 | 0.3773425948616511 | 0.5074768900411568 | T | T | T |
| 0.0027364047387004 | 0.5686142804607232 | 0.3828882042176469 | T | T | T |
| 0.9779269096626612 | 0.6411635971401259 | 0.3115721445857748 | T | T | T |
| 0.0653050403265101 | 0.6214621206069444 | 0.3257534347003199 | T | T | T |
| 0.9950789976660110 | 0.6399662362823323 | 0.6020925752951332 | T | T | T |
| 0.9266707574503819 | 0.6756577251596432 | 0.6229500573912988 | T | T | T |

**Figure 7(b) TS2**

Si O Al Zn C H

1.0000000000000000

20.0219999999999985 0.0000000000000000 0.0000000000000000

0.0000000000000000 19.8990000000000009 0.0000000000000000

0.0000000000000000 0.0000000000000000 13.3829999999999991

93 194 3 2 2 8

Selective dynamics

Direct

|                    |                    |                    |   |   |   |
|--------------------|--------------------|--------------------|---|---|---|
| 0.4225605148920058 | 0.0593457292963918 | 0.6483130706896634 | T | T | T |
| 0.3042543032970933 | 0.0316087563719407 | 0.7910327208742578 | T | T | T |
| 0.2823426323670456 | 0.0540087803717226 | 0.0168622656472412 | T | T | T |
| 0.1231506130371967 | 0.0623404687271209 | 0.0123870187699169 | T | T | T |
| 0.0677831133977095 | 0.0307857788994782 | 0.8018983129210503 | T | T | T |
| 0.1800147665836376 | 0.0662279843870204 | 0.6656400789587844 | T | T | T |
| 0.4190066490323228 | 0.8282676468662532 | 0.6713301125128084 | T | T | T |
| 0.2987411391772305 | 0.8730161734912075 | 0.7981749476623792 | T | T | T |
| 0.2672248286415294 | 0.8305064666903179 | 0.0183213297228231 | T | T | T |
| 0.1108342028366011 | 0.8256043821724216 | 0.0159509411383895 | T | T | T |
| 0.0661691333978034 | 0.8741267178605980 | 0.8014824510623879 | T | T | T |
| 0.1766686934455178 | 0.8278826531449445 | 0.6621227818586664 | T | T | T |
| 0.0751430578074859 | 0.9413555900526268 | 0.1501377693608220 | T | T | T |
| 0.1957526127291371 | 0.9698567007450728 | 0.2901153555306141 | T | T | T |
| 0.2160148986337845 | 0.9442458819183656 | 0.5168605128775571 | T | T | T |
| 0.3764606038278191 | 0.9344149054557853 | 0.5143000635838010 | T | T | T |
| 0.4327737882941475 | 0.9680938865531974 | 0.3026363312133611 | T | T | T |
| 0.3203700871386199 | 0.9331743081324910 | 0.1654601164851889 | T | T | T |
| 0.0821276048369170 | 0.1721021922858994 | 0.1667647965128831 | T | T | T |
| 0.1999389223144780 | 0.1285110030369042 | 0.2983547093063290 | T | T | T |
| 0.2311176838093450 | 0.1691681089265278 | 0.5172738668775182 | T | T | T |
| 0.3872869588215960 | 0.1736933134032816 | 0.5100635216215601 | T | T | T |
| 0.4336918311175389 | 0.1259607714806047 | 0.2961652491635497 | T | T | T |
| 0.3201638479890961 | 0.1722532532714295 | 0.1615684781253033 | T | T | T |
| 0.5768463457859490 | 0.5554733858777082 | 0.3606742648521233 | T | T | T |
| 0.6903694373990654 | 0.5268401183703907 | 0.2100354565401313 | T | T | T |
| 0.7149809339634902 | 0.5656572347143636 | 0.9929675388653977 | T | T | T |
| 0.8736275117123603 | 0.5719940531315999 | 0.9889260706711359 | T | T | T |
| 0.8127326102805157 | 0.5523355359670165 | 0.3479465502017661 | T | T | T |
| 0.5731331161657397 | 0.3286047473922064 | 0.3327726995786063 | T | T | T |
| 0.6930804315974625 | 0.3727152379722540 | 0.1955192640422415 | T | T | T |
| 0.7308850197424206 | 0.3293112553195814 | 0.9786063444421383 | T | T | T |
| 0.8855915412552666 | 0.3255496617906520 | 0.9875066067283806 | T | T | T |
| 0.9391919673258030 | 0.3725261573701918 | 0.1855783705754303 | T | T | T |
| 0.9203528021382745 | 0.4469170790742466 | 0.8595659742316537 | T | T | T |
| 0.7996958464817022 | 0.4758744218960138 | 0.7208200113399063 | T | T | T |
| 0.7806394300029011 | 0.4397653948799798 | 0.4969960734197486 | T | T | T |

**Structure files (CONTCAR) involved in this work:**

|                    |                    |                    |   |   |   |
|--------------------|--------------------|--------------------|---|---|---|
| 0.6235511398953717 | 0.4285183030388566 | 0.4901408224896881 | T | T | T |
| 0.5715663888182013 | 0.4690735673052890 | 0.6997141289994280 | T | T | T |
| 0.6757952330979227 | 0.4488883369588599 | 0.8580709370034446 | T | T | T |
| 0.9200149896176830 | 0.6783826057441993 | 0.8311919751742037 | T | T | T |
| 0.7658583731792271 | 0.6702685437863379 | 0.4635782631733611 | T | T | T |
| 0.6112456267508936 | 0.6740000000447076 | 0.4889141272045873 | T | T | T |
| 0.5622303742111816 | 0.6271213262308253 | 0.6999201246307485 | T | T | T |
| 0.6731430527308889 | 0.6740115961263641 | 0.8351216570246170 | T | T | T |
| 0.5775057094426344 | 0.9468190138000130 | 0.3601178835131516 | T | T | T |
| 0.6981655953840635 | 0.9751271508667747 | 0.2172150937275818 | T | T | T |
| 0.7185538123578082 | 0.9396876463877994 | 0.9954188073366369 | T | T | T |
| 0.8781729106647096 | 0.9353533300468592 | 0.9968829884954157 | T | T | T |
| 0.9300048712815701 | 0.9721059779594566 | 0.2066076421921683 | T | T | T |
| 0.8218542557766720 | 0.9470503614335023 | 0.3569888369329859 | T | T | T |
| 0.5761679894230480 | 0.1741050036232548 | 0.3320541139769604 | T | T | T |
| 0.6974578173691091 | 0.1335547193123344 | 0.1971779793838500 | T | T | T |
| 0.7311822148735108 | 0.1727381092293102 | 0.9745101676756800 | T | T | T |
| 0.8859196073177016 | 0.1736544226527376 | 0.9803176908579005 | T | T | T |
| 0.9343817838478379 | 0.1305781409198789 | 0.1961884750773543 | T | T | T |
| 0.8205310359488367 | 0.1758202851934595 | 0.3346482653991129 | T | T | T |
| 0.9228253725920724 | 0.0530407583054776 | 0.8561307222002872 | T | T | T |
| 0.7997727472818411 | 0.0251962150454876 | 0.7113762449134153 | T | T | T |
| 0.7815461810119284 | 0.0668130559572864 | 0.4934046289870010 | T | T | T |
| 0.6211171985859331 | 0.0714747446251132 | 0.4917235200686846 | T | T | T |
| 0.5685872862679195 | 0.0325816721484526 | 0.7001600755730705 | T | T | T |
| 0.6767735182602596 | 0.0551793592948120 | 0.8526283362454696 | T | T | T |
| 0.9221402435293665 | 0.8312424728424668 | 0.8395661779570338 | T | T | T |
| 0.8007742030036397 | 0.8668424652177973 | 0.6964929536566724 | T | T | T |
| 0.7674649631963811 | 0.8269210250491342 | 0.4783266658564298 | T | T | T |
| 0.6125877646950392 | 0.8275603746494125 | 0.4910285597609893 | T | T | T |
| 0.5635320102393259 | 0.8759847282793882 | 0.6995337756670628 | T | T | T |
| 0.6767411010052853 | 0.8320981023974784 | 0.8376192975162075 | T | T | T |
| 0.4251854549195161 | 0.4426606428998606 | 0.6405929190107222 | T | T | T |
| 0.3060593909562025 | 0.4682471920700765 | 0.7844333158886745 | T | T | T |
| 0.2825491950669459 | 0.4452815232827149 | 0.0098203456037907 | T | T | T |
| 0.1246869021968502 | 0.4362897431906849 | 0.0129182182406999 | T | T | T |
| 0.0649240387964990 | 0.4683201219581886 | 0.8025484622402449 | T | T | T |
| 0.1778378334164402 | 0.4343469241553667 | 0.6617249749172744 | T | T | T |
| 0.4177168473402852 | 0.6738909378373412 | 0.6675679897601481 | T | T | T |
| 0.2985590396999818 | 0.6270316813843724 | 0.7949563865285151 | T | T | T |
| 0.2685690461319389 | 0.6695846577669063 | 0.0169381499831323 | T | T | T |
| 0.1128769952589653 | 0.6716442931452473 | 0.0152204592380093 | T | T | T |
| 0.0657504383125261 | 0.6271012891929596 | 0.8010702740425973 | T | T | T |
| 0.1757201439283410 | 0.6708424416647253 | 0.6589426196395931 | T | T | T |
| 0.0769823285055707 | 0.5566323490624183 | 0.1529155904624593 | T | T | T |
| 0.1998213271425948 | 0.5289447144385770 | 0.2847502607486791 | T | T | T |
| 0.2157985419226870 | 0.5552365896520584 | 0.5153317548846860 | T | T | T |
| 0.3756661864303008 | 0.5676503838230451 | 0.5131305065996735 | T | T | T |
| 0.4297160424112220 | 0.5304816124184930 | 0.3031961157334893 | T | T | T |
| 0.3245532151631497 | 0.5644918399701362 | 0.1570269972613226 | T | T | T |
| 0.0861542805592658 | 0.3253985889828588 | 0.1592603558210085 | T | T | T |
| 0.2001693963814510 | 0.3704637520049683 | 0.2959106983084845 | T | T | T |
| 0.2298985099322044 | 0.3302376365624573 | 0.5159798195568935 | T | T | T |

**Structure files (CONTCAR) involved in this work:**

|                    |                    |                    |   |   |   |
|--------------------|--------------------|--------------------|---|---|---|
| 0.3853292254757469 | 0.3271198275544923 | 0.5055924050009087 | T | T | T |
| 0.4298832610847362 | 0.3740077917245276 | 0.2934390272738201 | T | T | T |
| 0.3192784065333488 | 0.3283228807171197 | 0.1574326131078505 | T | T | T |
| 0.0127925856384927 | 0.5472088494594577 | 0.2275930030914609 | T | T | T |
| 0.3596699065996849 | 0.0698180017615065 | 0.7233440662444134 | T | T | T |
| 0.3173164267631817 | 0.0487643460258946 | 0.9076811352849943 | T | T | T |
| 0.2022082470176180 | 0.0459690564333351 | 0.0053464083393797 | T | T | T |
| 0.0916467162666910 | 0.0701954264971724 | 0.9017241215713718 | T | T | T |
| 0.1033894887976730 | 0.0641758050585674 | 0.7048324429479117 | T | T | T |
| 0.2298039971802361 | 0.0571625566994160 | 0.7610085932996702 | T | T | T |
| 0.3602590546212248 | 0.8289383403108049 | 0.7550058419600901 | T | T | T |
| 0.2967335968821788 | 0.8654048735110782 | 0.9182600623922800 | T | T | T |
| 0.1883618941188134 | 0.8487514239898730 | 0.0282606742043098 | T | T | T |
| 0.0892569366323253 | 0.8320531454438548 | 0.8995911083421090 | T | T | T |
| 0.1010075373031955 | 0.8407375926669486 | 0.7030409872761162 | T | T | T |
| 0.2285858764030952 | 0.8459785490590188 | 0.7518279803833616 | T | T | T |
| 0.3102282492970185 | 0.9513033931080074 | 0.7685716060246447 | T | T | T |
| 0.0896877545100348 | 0.9520053992104398 | 0.8116908530518405 | T | T | T |
| 0.4331271926364185 | 0.1267305572878069 | 0.5813572139826699 | T | T | T |
| 0.4110876119982272 | 0.9958970094925313 | 0.5742602700717073 | T | T | T |
| 0.3926330930893372 | 0.8636036073637542 | 0.5693018201964890 | T | T | T |
| 0.1931111325130422 | 0.1389509420321773 | 0.6142182135115390 | T | T | T |
| 0.1914405906760478 | 0.0057979476406211 | 0.5864844803000958 | T | T | T |
| 0.1913103613261998 | 0.8728864446942987 | 0.5634437309068941 | T | T | T |
| 0.9877423692525602 | 0.0378349183732475 | 0.7869520135206045 | T | T | T |
| 0.9854651503687450 | 0.8705445347285513 | 0.7896773439328311 | T | T | T |
| 0.1388798873745385 | 0.9326604168533462 | 0.2239666248706903 | T | T | T |
| 0.1829392696141519 | 0.9531830495689418 | 0.4070184883338837 | T | T | T |
| 0.2965696264882187 | 0.9460466789493603 | 0.5086623624001433 | T | T | T |
| 0.4072838103874002 | 0.930311077729360  | 0.4029572791495810 | T | T | T |
| 0.3966098016471245 | 0.9343637556917945 | 0.2062448357213605 | T | T | T |
| 0.2694366775804752 | 0.9424202597359322 | 0.2595382793963918 | T | T | T |
| 0.1380000751549830 | 0.1715572628883220 | 0.2546761326715572 | T | T | T |
| 0.1988661470160515 | 0.1348834526885950 | 0.4187044351324965 | T | T | T |
| 0.3098841303136814 | 0.1499018654205609 | 0.5219807783270870 | T | T | T |
| 0.4099958470987666 | 0.1674926261951586 | 0.3944032606531537 | T | T | T |
| 0.3962285580404037 | 0.1568652758194450 | 0.1982705037890233 | T | T | T |
| 0.2701835934474816 | 0.1578446461080481 | 0.2555238841811066 | T | T | T |
| 0.1914595848603301 | 0.0500943615964759 | 0.2666995973782264 | T | T | T |
| 0.4131777324361594 | 0.0474143334397838 | 0.3095144144025314 | T | T | T |
| 0.0644691998190920 | 0.8720804558614049 | 0.0873116427179448 | T | T | T |
| 0.0856649208920885 | 0.0018151797905147 | 0.0705769006248604 | T | T | T |
| 0.1107495473112762 | 0.1325415130588954 | 0.0700140427304201 | T | T | T |
| 0.3072347113307163 | 0.8606054334852613 | 0.1134695071894445 | T | T | T |
| 0.3103866319602981 | 0.9936027112066522 | 0.0858577738572155 | T | T | T |
| 0.3007584155364778 | 0.1262289373399688 | 0.0659132302251672 | T | T | T |
| 0.5126992541658062 | 0.9584900975225995 | 0.2892615548406480 | T | T | T |
| 0.5139859164917929 | 0.1329788891215295 | 0.2819801141661571 | T | T | T |
| 0.6375427738992319 | 0.5649177742148861 | 0.2823090552446473 | T | T | T |
| 0.6984796422797975 | 0.5729911427485016 | 0.1111660973563035 | T | T | T |
| 0.7944259138951043 | 0.5543084793487001 | 0.9745087131248524 | T | T | T |
| 0.8953574171127464 | 0.5805161457490153 | 0.1034499823631089 | T | T | T |
| 0.8886403072409266 | 0.5361879648084908 | 0.3163343296947894 | T | T | T |



**Structure files (CONTCAR) involved in this work:**

|                    |                    |                    |   |   |   |
|--------------------|--------------------|--------------------|---|---|---|
| 0.7619444618934047 | 0.5217614310107332 | 0.2671565065179427 | T | T | T |
| 0.6367691861213770 | 0.3322314805983994 | 0.2595729707448972 | T | T | T |
| 0.6928472200694193 | 0.3400431181631858 | 0.0838540540989650 | T | T | T |
| 0.8087916690811490 | 0.3523409167048468 | 0.9870758795777815 | T | T | T |
| 0.9127843976284180 | 0.3196941717173349 | 0.1011493219068968 | T | T | T |
| 0.9064896644574837 | 0.3527240784675298 | 0.2933378988758908 | T | T | T |
| 0.7649143919853416 | 0.3678591193890259 | 0.2470776280803767 | T | T | T |
| 0.6669886392759637 | 0.4507779828536243 | 0.1853081296591404 | T | T | T |
| 0.9215005317581487 | 0.4477458215691549 | 0.1538068043726006 | T | T | T |
| 0.5645389229223741 | 0.6258273091030561 | 0.4199501593723832 | T | T | T |
| 0.5935222184954960 | 0.4967965414667436 | 0.4413763234512950 | T | T | T |
| 0.5889264305363926 | 0.3628188305945033 | 0.4410854956615104 | T | T | T |
| 0.7991550637026897 | 0.6320021814722763 | 0.3677264886023251 | T | T | T |
| 0.8002603155792588 | 0.5176647263148224 | 0.4608738450293295 | T | T | T |
| 0.8320332013535637 | 0.3900331172503919 | 0.4382148378521773 | T | T | T |
| 0.0202041871463010 | 0.3644302656814634 | 0.1958769731160336 | T | T | T |
| 0.8554142127363710 | 0.4376454291634553 | 0.7876429954547249 | T | T | T |
| 0.7910155722566342 | 0.4347211284817679 | 0.6164362200820325 | T | T | T |
| 0.7037483247780829 | 0.4244744318570277 | 0.4676227099893471 | T | T | T |
| 0.6091019951361228 | 0.4289122854870581 | 0.6094041975755119 | T | T | T |
| 0.6026437590840789 | 0.4461754148727289 | 0.8061921759507062 | T | T | T |
| 0.7283887036332324 | 0.4789586300532803 | 0.7763803535879676 | T | T | T |
| 0.8690882819483595 | 0.6819505492266246 | 0.7376985090137741 | T | T | T |
| 0.8080981306971146 | 0.6477392663274434 | 0.5627051045971839 | T | T | T |
| 0.6883534577536788 | 0.6479667671850921 | 0.4796753360270496 | T | T | T |
| 0.5869425788962345 | 0.6707249511770607 | 0.6041418364837098 | T | T | T |
| 0.5964509945262824 | 0.6564539668727075 | 0.8008743816471574 | T | T | T |
| 0.7231307768552291 | 0.6552693428513211 | 0.7452382425010528 | T | T | T |
| 0.8246355926121410 | 0.5524619638837429 | 0.6960644193267074 | T | T | T |
| 0.5824552961203940 | 0.5490489367960000 | 0.6815426687283326 | T | T | T |
| 0.9308124852264502 | 0.3777554320509479 | 0.9222641085180383 | T | T | T |
| 0.9151392058947048 | 0.5118394213267834 | 0.9319056599682333 | T | T | T |
| 0.8885682015722564 | 0.6417831721778262 | 0.9281299418816271 | T | T | T |
| 0.6957470372999855 | 0.3734268878643359 | 0.8911357505859498 | T | T | T |
| 0.6746580243222533 | 0.4996276478566438 | 0.9528886466484289 | T | T | T |
| 0.6896565641291471 | 0.6330929624521286 | 0.9373160470210341 | T | T | T |
| 0.4927102157522890 | 0.4508203502925909 | 0.7054562041481383 | T | T | T |
| 0.4814016294198371 | 0.6328732565194786 | 0.7115161877437909 | T | T | T |
| 0.6432215645747431 | 0.9411979843631326 | 0.2903101688634397 | T | T | T |
| 0.6984436780552146 | 0.9341417884758065 | 0.1123858392634544 | T | T | T |
| 0.7988531479791475 | 0.9484238636276393 | 0.9815922311829616 | T | T | T |
| 0.8971364581015565 | 0.9301721487028106 | 0.1143226609456561 | T | T | T |
| 0.8970933956583336 | 0.9484408195449682 | 0.3117718335512439 | T | T | T |
| 0.7714253303478593 | 0.9689870640613978 | 0.2678165726651999 | T | T | T |
| 0.6387033501651468 | 0.1733668044081427 | 0.2557165762156161 | T | T | T |
| 0.6972825063221036 | 0.1596440310995326 | 0.0826233880561632 | T | T | T |
| 0.8087240874541213 | 0.1477677377842737 | 0.9772586446083822 | T | T | T |
| 0.9130266945430610 | 0.1688172243497605 | 0.0940391583166588 | T | T | T |
| 0.8962964338191028 | 0.1624652250965058 | 0.2919520665912905 | T | T | T |
| 0.7694015411688782 | 0.1474516992868520 | 0.2484681718935176 | T | T | T |
| 0.6802939299723061 | 0.0536271761221572 | 0.1991710269256921 | T | T | T |
| 0.9164770691688131 | 0.0512368884935586 | 0.1859744361220023 | T | T | T |
| 0.5678709928284279 | 0.8768142421912061 | 0.4213773818225527 | T | T | T |

**Structure files (CONTCAR) involved in this work:**

|                    |                    |                    |   |   |   |
|--------------------|--------------------|--------------------|---|---|---|
| 0.5830075202964584 | 0.0081989621527022 | 0.4399163530297037 | T | T | T |
| 0.5971295271020823 | 0.1407073290291088 | 0.4385306684737046 | T | T | T |
| 0.8067195030415479 | 0.8714318618241664 | 0.3961507810891362 | T | T | T |
| 0.8157155281348614 | 0.9984989685764727 | 0.4503678990898191 | T | T | T |
| 0.8105462366835336 | 0.1322188354604105 | 0.4370246198101001 | T | T | T |
| 0.0092898469263470 | 0.9561544505330584 | 0.2165344191307063 | T | T | T |
| 0.0147058962689285 | 0.1384671413003773 | 0.2114589024065955 | T | T | T |
| 0.8571431947442938 | 0.0520008243020603 | 0.7862169198575780 | T | T | T |
| 0.7999849113368411 | 0.0715206046705009 | 0.6115569598395039 | T | T | T |
| 0.7009889767222919 | 0.0614621436999721 | 0.4780721802851501 | T | T | T |
| 0.6008979240985750 | 0.0761218009611693 | 0.6091222969374643 | T | T | T |
| 0.6019610347876948 | 0.0529529503977595 | 0.8062963252718067 | T | T | T |
| 0.7276490692050567 | 0.0305559362486828 | 0.7655563245685666 | T | T | T |
| 0.8604550724492667 | 0.8344148000438957 | 0.7618872508473421 | T | T | T |
| 0.8028180873905068 | 0.8312334858776751 | 0.5874045737677435 | T | T | T |
| 0.690267557794177  | 0.8521513747726454 | 0.4866178149896555 | T | T | T |
| 0.5869339113620110 | 0.8296638069625427 | 0.6059470529544425 | T | T | T |
| 0.6019498656968415 | 0.8527475839205835 | 0.8005935982137189 | T | T | T |
| 0.7292271629845732 | 0.8520200840133286 | 0.7491919422598899 | T | T | T |
| 0.8127046855027116 | 0.9469309046851054 | 0.6828174395006495 | T | T | T |
| 0.5812041206753896 | 0.9537047595726558 | 0.6742191056873672 | T | T | T |
| 0.9307962548374212 | 0.1267596247311925 | 0.9069272985447497 | T | T | T |
| 0.9187123358900718 | 0.9969744790734024 | 0.9447329400442217 | T | T | T |
| 0.9004099870605936 | 0.8649543643866885 | 0.9451319284657247 | T | T | T |
| 0.6920841667440644 | 0.1313964596809601 | 0.8880421400898887 | T | T | T |
| 0.6815776650311599 | 0.0051626520761627 | 0.9483675908271232 | T | T | T |
| 0.6945514524174221 | 0.8715730869859347 | 0.9400935987365806 | T | T | T |
| 0.4893989852520074 | 0.0472190833637916 | 0.7135717469146585 | T | T | T |
| 0.4835442946106268 | 0.8673373080435842 | 0.7166968727282739 | T | T | T |
| 0.3618923657923682 | 0.4320417499708268 | 0.7151708053528287 | T | T | T |
| 0.3166099584053032 | 0.4459162439101975 | 0.8997136417554525 | T | T | T |
| 0.2024956034078221 | 0.4582264972853435 | 0.0009156717249894 | T | T | T |
| 0.0894644708984156 | 0.4319503011876032 | 0.9041084942046537 | T | T | T |
| 0.1022391907823914 | 0.4355691730613457 | 0.7061396067017900 | T | T | T |
| 0.2310565290278595 | 0.4457341557700694 | 0.7515912962114608 | T | T | T |
| 0.3578011401615792 | 0.6730298362101568 | 0.7495730222795858 | T | T | T |
| 0.2962061455320353 | 0.6366361719310252 | 0.9144240694006134 | T | T | T |
| 0.1903654681274451 | 0.6494488469796961 | 0.0307079721972035 | T | T | T |
| 0.0945860821591107 | 0.6668462668023448 | 0.8971314134401828 | T | T | T |
| 0.0993067543016350 | 0.6568010952007357 | 0.6982841420970171 | T | T | T |
| 0.2268264230996475 | 0.6489056187734283 | 0.7475665784678457 | T | T | T |
| 0.3138782777363354 | 0.5489194975032197 | 0.7689525310646158 | T | T | T |
| 0.0835245627102711 | 0.5477992033830725 | 0.8094876421182352 | T | T | T |
| 0.4331163387811678 | 0.3771258359094804 | 0.5690867231807482 | T | T | T |
| 0.4162500309344894 | 0.5087220975870744 | 0.5705133102968051 | T | T | T |
| 0.3911987564339400 | 0.6399291127910923 | 0.5641137148947591 | T | T | T |
| 0.1897564054152787 | 0.3613639185480603 | 0.6107168007759768 | T | T | T |
| 0.1837472493014298 | 0.4939850517883340 | 0.5791259773591335 | T | T | T |
| 0.1888518880062640 | 0.6268638106759246 | 0.5582686829409523 | T | T | T |
| 0.9850595379951707 | 0.4573110910698142 | 0.7853748561640289 | T | T | T |
| 0.9857911017547648 | 0.6369448460036810 | 0.7903971389517936 | T | T | T |
| 0.1432889008761370 | 0.5689619590495372 | 0.2213115752974245 | T | T | T |
| 0.1890784963480803 | 0.5482228115291378 | 0.4013984627786691 | T | T | T |

**Structure files (CONTCAR) involved in this work:**

|                    |                    |                    |   |   |   |
|--------------------|--------------------|--------------------|---|---|---|
| 0.2962762845153846 | 0.5510977783660320 | 0.5197977963877088 | T | T | T |
| 0.3992096424366468 | 0.5714912006547445 | 0.3977265782442139 | T | T | T |
| 0.4001254411506210 | 0.5627123387733329 | 0.2005716090677243 | T | T | T |
| 0.2737242303241917 | 0.5519871863985770 | 0.2505724563728919 | T | T | T |
| 0.1395881496141575 | 0.3263320258191527 | 0.2508944738742396 | T | T | T |
| 0.1982895940975059 | 0.3638739218108513 | 0.4161961023454176 | T | T | T |
| 0.3082443489267468 | 0.3509154611370416 | 0.5227727212296113 | T | T | T |
| 0.4037105269525582 | 0.3295283118841371 | 0.3876372710228345 | T | T | T |
| 0.3953477952918273 | 0.3462779653327402 | 0.1911680772196324 | T | T | T |
| 0.2712246057476189 | 0.3439637476992745 | 0.2532813323216833 | T | T | T |
| 0.1893875909002576 | 0.4490080759928673 | 0.2653397705636344 | T | T | T |
| 0.4079258238646425 | 0.4518331451909745 | 0.3123588440321636 | T | T | T |
| 0.0659794538761235 | 0.6222920820961007 | 0.0817134393139624 | T | T | T |
| 0.0858684137362005 | 0.4912323341276635 | 0.0815452012665778 | T | T | T |
| 0.1195665450795346 | 0.3621594000027962 | 0.0626069529757869 | T | T | T |
| 0.3110068658401590 | 0.6381499631515245 | 0.1089982885923003 | T | T | T |
| 0.3152357000715647 | 0.5058115043455244 | 0.0742989350034723 | T | T | T |
| 0.2972565781342417 | 0.3730541551139721 | 0.0615389048801455 | T | T | T |
| 0.5100531722425033 | 0.5366019003749116 | 0.2987895856971631 | T | T | T |
| 0.5101837371811702 | 0.3677513660748732 | 0.2815265524127780 | T | T | T |
| 0.4382639052566007 | 0.7511007916557738 | 0.6448469604952600 | T | T | T |
| 0.1845302313768092 | 0.7493597955521415 | 0.6300931451789996 | T | T | T |
| 0.2781676625793744 | 0.7500523952178434 | 0.0143435795179262 | T | T | T |
| 0.1013183143482481 | 0.7482780654473765 | 0.0518448431868676 | T | T | T |
| 0.0686612692978175 | 0.2485791460130743 | 0.1305305976394394 | T | T | T |
| 0.3134789831729751 | 0.2499613212773610 | 0.1260618622527330 | T | T | T |
| 0.2205204478690276 | 0.2497555222991761 | 0.5146298433058322 | T | T | T |
| 0.3957045917766382 | 0.2510869620325574 | 0.5460053534648409 | T | T | T |
| 0.5529624392977316 | 0.2508668346561863 | 0.3532439331991699 | T | T | T |
| 0.8089666352394494 | 0.2533005501249934 | 0.3596067681654341 | T | T | T |
| 0.7261909848803770 | 0.2513220620197328 | 0.9447245434230280 | T | T | T |
| 0.8908949255866793 | 0.2505367944493165 | 0.9394950161530756 | T | T | T |
| 0.9434489332004309 | 0.7539526447047898 | 0.8618870618709394 | T | T | T |
| 0.6791587230635935 | 0.7530691012497420 | 0.8631686575829013 | T | T | T |
| 0.7708325483413011 | 0.7496757176929809 | 0.4407775149109938 | T | T | T |
| 0.6052007884718138 | 0.7510461642360285 | 0.4499278397960175 | T | T | T |
| 0.9296049851917818 | 0.4858412888530783 | 0.5447642608143252 | T | T | T |
| 0.9462810123224616 | 0.6448297295598218 | 0.5729231794036201 | T | T | T |
| 0.9267513622686472 | 0.5289963360910220 | 0.1969291089788725 | T | T | T |
| 0.8230336253692596 | 0.3358932255106133 | 0.3292796987006872 | T | T | T |
| 0.7990459896636685 | 0.6388887537148643 | 0.6947804529972506 | T | T | T |
| 0.9314491290396182 | 0.4232557012159722 | 0.4179672722135497 | T | T | T |
| 0.8780465354135158 | 0.5655357233063190 | 0.5639347322023816 | T | T | T |
| 0.0278205078449325 | 0.4362958227450337 | 0.3981066588375088 | T | T | T |
| 0.0250545438334463 | 0.5751119244009602 | 0.3831757281997632 | T | T | T |
| 0.9487158518970046 | 0.4675813697308189 | 0.6061402666038720 | T | T | T |
| 0.0620724731620804 | 0.4404848494134715 | 0.4621423817624439 | T | T | T |
| 0.0541102853094934 | 0.4344540857251812 | 0.3266821962294364 | T | T | T |
| 0.0116193859232480 | 0.5369874906142725 | 0.4385054702337017 | T | T | T |
| 0.9867012717449621 | 0.6115000637474238 | 0.3647275098589000 | T | T | T |
| 0.0773633777673297 | 0.5876434061548780 | 0.3730751105993169 | T | T | T |
| 0.9237970134723459 | 0.6736309556471003 | 0.6238510699237761 | T | T | T |
| 0.9900465550503266 | 0.6347616887668309 | 0.6018534509679180 | T | T | T |

**Structure files (CONTCAR) involved in this work:****Figure 7(b) TS3**

Si O Al Zn C H

1.0000000000000000

20.0219999999999985 0.0000000000000000 0.0000000000000000

0.0000000000000000 19.8990000000000009 0.0000000000000000

0.0000000000000000 0.0000000000000000 13.3829999999999991

93 194 3 2 2 8

Selective dynamics

Direct

0.4233815320834466 0.0609508560892878 0.6471080830788778 T T T

0.3057663659704909 0.0299994791530851 0.7911804707080712 T T T

0.2822199907067000 0.0565956129882071 0.0153912298086570 T T T

0.1226905105873939 0.0619156301864935 0.0122289576811252 T T T

0.0679617327684517 0.0313766461963070 0.8001360386895475 T T T

0.1807549915323337 0.0642749908327867 0.6644696257796269 T T T

0.4195654030049073 0.8281586733587004 0.6702402031014180 T T T

0.3020702252112413 0.8708314863085569 0.8029859212378264 T T T

0.2668374084289212 0.8329973490727620 0.0230093616854204 T T T

0.1127085503577409 0.8278758162435148 0.0122110598405003 T T T

0.0660853037362266 0.8747898177685630 0.7978735181943387 T T T

0.1803544789065917 0.8275685722178530 0.6674348684482607 T T T

0.0762893902609707 0.9401484943888552 0.1501170776863607 T T T

0.1944344537057198 0.9705917883271028 0.2930963906184031 T T T

0.2173382213684329 0.9428870759149498 0.5175739498257012 T T T

0.3775566303304891 0.9366349281902981 0.5137102379527515 T T T

0.4337460882074758 0.9693088676004982 0.3029235916673975 T T T

0.3201975174805644 0.9382853091916655 0.1661766227752034 T T T

0.0818932108305722 0.1724374244566778 0.1665705709215775 T T T

0.1974557009928098 0.1296424783209209 0.3027147370197816 T T T

0.2323513116523947 0.1710815244805558 0.5207623412928554 T T T

0.3875143909439481 0.1754204329259011 0.5090399376121408 T T T

0.4353604444451279 0.1274968398738137 0.2965062468035081 T T T

0.3187273720146381 0.1708937812578724 0.1656570903905566 T T T

0.5763270497901957 0.5570355186370317 0.3533670091094779 T T T

0.6960368038917087 0.5255800909097750 0.2118143852522776 T T T

0.7163881470876365 0.5669631148351576 0.9912607165524104 T T T

0.8745238565004712 0.5722583618978357 0.9840680779083155 T T T

0.8172598548088998 0.5535879071772165 0.3529529678189968 T T T

0.5779131123789638 0.3282039002387682 0.3344424409291851 T T T

0.6959945741003960 0.3716407416768214 0.1927584481350085 T T T

0.7315270548780863 0.3281412480165391 0.9788198559067708 T T T

0.8864276433596647 0.3255730921803595 0.9923979461594620 T T T

0.9418327587833994 0.3713392667883019 0.1931132301233445 T T T

0.9203496434852340 0.4442913196552521 0.8577152543356781 T T T

0.7989119137172827 0.4719888473540672 0.7190448461218037 T T T

0.7786593092836579 0.4384986460010130 0.4958282098354030 T T T

0.6207110321596085 0.4335141006297094 0.4885041016919649 T T T

0.5706989314002426 0.4709953725050907 0.7020307245475413 T T T

0.6764872311490702 0.4480575406061310 0.8586620479847560 T T T

0.9197728380801883 0.6794618731789339 0.8304895826106508 T T T

0.7642526268144574 0.6716285873553526 0.4688247107528378 T T T

0.6104412055874867 0.6733627256792798 0.4876978145244620 T T T

0.5600082312872078 0.6292298847312879 0.7009830932184308 T T T

**Structure files (CONTCAR) involved in this work:**

|                    |                    |                    |   |   |   |
|--------------------|--------------------|--------------------|---|---|---|
| 0.6714219745638620 | 0.6715952500917742 | 0.8352429730249564 | T | T | T |
| 0.5779822914413149 | 0.9447914160126026 | 0.3586187651055817 | T | T | T |
| 0.6975999384277821 | 0.9731980162485819 | 0.2143337044151580 | T | T | T |
| 0.7196645289144986 | 0.9378312691263169 | 0.9933130512459979 | T | T | T |
| 0.8794444842477502 | 0.9358808155333509 | 0.9942283126324496 | T | T | T |
| 0.9312523735441768 | 0.9704249251682822 | 0.2053309680512154 | T | T | T |
| 0.8212375597951515 | 0.9460205889527655 | 0.3536176385143235 | T | T | T |
| 0.5785735037598628 | 0.1734540318064561 | 0.3321996210505818 | T | T | T |
| 0.6977820788068515 | 0.1302444290948421 | 0.1951308660109531 | T | T | T |
| 0.7329111092103073 | 0.1716756701202753 | 0.9746127872307646 | T | T | T |
| 0.8876253853675469 | 0.1732771444550336 | 0.9815613063312851 | T | T | T |
| 0.9361648408543457 | 0.1290268669616240 | 0.1969334569102896 | T | T | T |
| 0.8199766559248075 | 0.1719378828906479 | 0.3311556983871676 | T | T | T |
| 0.9232778222800094 | 0.0542787098104737 | 0.8543655822976058 | T | T | T |
| 0.8005560129308972 | 0.0249463610026826 | 0.7102513592590640 | T | T | T |
| 0.7822809648712479 | 0.0647700654807211 | 0.4917923853681725 | T | T | T |
| 0.6219848228139874 | 0.0688834432870722 | 0.4910294985722954 | T | T | T |
| 0.5690077632076868 | 0.0320349271075718 | 0.7007731883427200 | T | T | T |
| 0.6778455701618343 | 0.0540872936562504 | 0.8517654475570039 | T | T | T |
| 0.9228325491902647 | 0.8318741431097229 | 0.8345601722410537 | T | T | T |
| 0.8015506645035572 | 0.8667884221450316 | 0.6926358513861518 | T | T | T |
| 0.7657807161050272 | 0.8273351188729287 | 0.4752795693584694 | T | T | T |
| 0.6120906404859945 | 0.8272676890370124 | 0.4908399899952984 | T | T | T |
| 0.5636959926581268 | 0.8744203491844653 | 0.7011839820787779 | T | T | T |
| 0.6792503467864011 | 0.8300213653409299 | 0.8344043893148941 | T | T | T |
| 0.4258750690236391 | 0.4459794385559680 | 0.6359161376228932 | T | T | T |
| 0.3046636719297396 | 0.4711026552985237 | 0.7809588740503116 | T | T | T |
| 0.2838761199040384 | 0.4385526965187616 | 0.0014632142174432 | T | T | T |
| 0.1240786005397806 | 0.4349046323154098 | 0.0053132707964497 | T | T | T |
| 0.0654193528225962 | 0.4710640492037609 | 0.7955940183415454 | T | T | T |
| 0.1778069627721426 | 0.4436878798648087 | 0.6484498626239217 | T | T | T |
| 0.4194391591393691 | 0.6741852578121714 | 0.6534814677609970 | T | T | T |
| 0.2999010290357709 | 0.6297048687377799 | 0.7896969864836233 | T | T | T |
| 0.2695253049941650 | 0.6737864998540158 | 0.0076120440081557 | T | T | T |
| 0.1152546044747435 | 0.6737908479252070 | 0.0004914595323139 | T | T | T |
| 0.0628867002920580 | 0.6303589502121021 | 0.7904032453062545 | T | T | T |
| 0.1779999167173659 | 0.6693436920881595 | 0.6557529863758422 | T | T | T |
| 0.0788684890928359 | 0.5585405855737904 | 0.1388221502173391 | T | T | T |
| 0.2020429329920886 | 0.5294743132209625 | 0.2745534452610710 | T | T | T |
| 0.2214527347310496 | 0.5615468693442526 | 0.5043759970115780 | T | T | T |
| 0.3808814461394951 | 0.5687450859133930 | 0.5017417008937980 | T | T | T |
| 0.4311165489717343 | 0.5300086668788118 | 0.2893497924581678 | T | T | T |
| 0.3267211232437024 | 0.5593769291699288 | 0.1365799055571035 | T | T | T |
| 0.0853813256631322 | 0.3252669637061107 | 0.1566862640338072 | T | T | T |
| 0.2018006466501759 | 0.3706744152791746 | 0.2934024884360437 | T | T | T |
| 0.2308143672697457 | 0.3318776298971640 | 0.5151758759270255 | T | T | T |
| 0.3858263501421339 | 0.3293608316371951 | 0.5031985298405477 | T | T | T |
| 0.4349504630400164 | 0.3720822117509387 | 0.2896003827253728 | T | T | T |
| 0.3219612773797442 | 0.3280730555053972 | 0.1597504278081897 | T | T | T |
| 0.0124985891850911 | 0.5528649138863813 | 0.2119034991002548 | T | T | T |
| 0.3595030114041750 | 0.0686174388893195 | 0.7210797133842578 | T | T | T |
| 0.3168424637087117 | 0.0532005392461514 | 0.9059656830764894 | T | T | T |
| 0.2021079686239519 | 0.0469505355057007 | 0.0058478065264709 | T | T | T |

**Structure files (CONTCAR) involved in this work:**

|                    |                    |                    |   |   |   |
|--------------------|--------------------|--------------------|---|---|---|
| 0.0915106110302061 | 0.0693553923246714 | 0.9013465722965348 | T | T | T |
| 0.1042283565501853 | 0.0654770345122438 | 0.7042163683427927 | T | T | T |
| 0.2301658301577790 | 0.0499723691662131 | 0.7586469612079351 | T | T | T |
| 0.3603205737681183 | 0.8254287023414961 | 0.7530994540327990 | T | T | T |
| 0.3037053124915567 | 0.8593492132440052 | 0.9225326733686299 | T | T | T |
| 0.1888913362926574 | 0.8562734097957556 | 0.0195722426363790 | T | T | T |
| 0.0865786321606483 | 0.8341640144787531 | 0.8983339362112457 | T | T | T |
| 0.1033646531337951 | 0.8400416486885627 | 0.7025634613064555 | T | T | T |
| 0.2293943282363192 | 0.8479237093766684 | 0.7599517761862586 | T | T | T |
| 0.3162152494171606 | 0.9493396869419801 | 0.7769954645785845 | T | T | T |
| 0.0896895900037442 | 0.9525667129001371 | 0.8074025223828550 | T | T | T |
| 0.4328473225723573 | 0.1298089354013714 | 0.5831173103376306 | T | T | T |
| 0.4136265063076929 | 0.9987687743532905 | 0.5701684912937879 | T | T | T |
| 0.3933108442974361 | 0.8667225064070265 | 0.5709470530745103 | T | T | T |
| 0.1972489467683671 | 0.1375280376442050 | 0.6175043008024117 | T | T | T |
| 0.1885738734773934 | 0.0054608119221382 | 0.5816203049499670 | T | T | T |
| 0.1972287503758833 | 0.8716235138483163 | 0.5686943471504378 | T | T | T |
| 0.9879763665073833 | 0.0389591107753700 | 0.7847630993828525 | T | T | T |
| 0.9856355842456751 | 0.8710627180231180 | 0.7827409382829766 | T | T | T |
| 0.1408076229793816 | 0.9320438853247278 | 0.2227094973041474 | T | T | T |
| 0.1838654193278733 | 0.9459158648576779 | 0.4073307880391863 | T | T | T |
| 0.2977375863820098 | 0.9497196376333779 | 0.5100272543882305 | T | T | T |
| 0.4072288136168398 | 0.9303929878869993 | 0.4018119328062110 | T | T | T |
| 0.3966845226240606 | 0.9380351908797572 | 0.2055983322677383 | T | T | T |
| 0.2703900365456779 | 0.9525137153258392 | 0.2599807961973261 | T | T | T |
| 0.1397785715518760 | 0.1747920446536451 | 0.2513874417476651 | T | T | T |
| 0.1951153292921599 | 0.1432677101074548 | 0.4216555597101444 | T | T | T |
| 0.3105161901133431 | 0.1494592046175730 | 0.5160289087767258 | T | T | T |
| 0.4132180618671801 | 0.1699142970251412 | 0.3947336464494448 | T | T | T |
| 0.3956108358285190 | 0.1566062054859702 | 0.1993109093012959 | T | T | T |
| 0.2705130962587818 | 0.1505236032860167 | 0.2592559897423318 | T | T | T |
| 0.1822695178992316 | 0.0509455841206531 | 0.2800617595421375 | T | T | T |
| 0.4163135535789092 | 0.0489403548185409 | 0.3131909107674857 | T | T | T |
| 0.0658459533303680 | 0.8703569410717746 | 0.0883122837099167 | T | T | T |
| 0.0860993679376692 | 0.0006135556701815 | 0.0701096825352186 | T | T | T |
| 0.1090816403722394 | 0.1320421575640300 | 0.0696408641359329 | T | T | T |
| 0.3038313665396467 | 0.8650957384059994 | 0.1191448187449706 | T | T | T |
| 0.3121676644367058 | 0.9960130844802946 | 0.0820410142476297 | T | T | T |
| 0.2997399059711588 | 0.1284551430655501 | 0.0661968758378016 | T | T | T |
| 0.5133166854357610 | 0.9579868349269985 | 0.2880988753826011 | T | T | T |
| 0.5152087989080750 | 0.1360886578847319 | 0.2789843319249380 | T | T | T |
| 0.6404212550806923 | 0.5631801928444945 | 0.2802608250119646 | T | T | T |
| 0.7087509972648960 | 0.5703894705803445 | 0.1121832902943811 | T | T | T |
| 0.7949125159187668 | 0.5641674327031796 | 0.9583041440226422 | T | T | T |
| 0.8885068624764274 | 0.5758379691208408 | 0.1012577508979971 | T | T | T |
| 0.8928049989717803 | 0.5444187646554537 | 0.3157271580214189 | T | T | T |
| 0.7650132782586134 | 0.5197459403125679 | 0.2762169945780394 | T | T | T |
| 0.6426888045918059 | 0.3322464748177296 | 0.2635350614928163 | T | T | T |
| 0.6904048308493066 | 0.3383591217502263 | 0.0817255477023811 | T | T | T |
| 0.8092436633730991 | 0.3516155898245338 | 0.9926123633428265 | T | T | T |
| 0.9157745521314726 | 0.3206469234850297 | 0.1053640709508254 | T | T | T |
| 0.9076323508211338 | 0.3485013646152284 | 0.3003114024845218 | T | T | T |
| 0.7702005852255547 | 0.3656357864917714 | 0.2359920763669226 | T | T | T |

**Structure files (CONTCAR) involved in this work:**

|                    |                    |                    |   |   |   |
|--------------------|--------------------|--------------------|---|---|---|
| 0.6717187512578233 | 0.4502093034624237 | 0.1844217528744163 | T | T | T |
| 0.9233107000604185 | 0.4465612682174914 | 0.1642135467773628 | T | T | T |
| 0.5654845489851844 | 0.6273480881043529 | 0.4131791952933023 | T | T | T |
| 0.5845426994796948 | 0.4972690110107616 | 0.4356759806692036 | T | T | T |
| 0.5920052388158439 | 0.3639873366220362 | 0.4421814032254213 | T | T | T |
| 0.7984432522027151 | 0.6312873255486112 | 0.3756922298335538 | T | T | T |
| 0.8117744014121653 | 0.5140573590528135 | 0.4652388422089498 | T | T | T |
| 0.8216627117044878 | 0.3823834045786262 | 0.4377896122657474 | T | T | T |
| 0.0227195414371311 | 0.3633038628629423 | 0.2081803546748792 | T | T | T |
| 0.8560002870371555 | 0.4341078721414428 | 0.7844041656370591 | T | T | T |
| 0.7877846572602983 | 0.4304378197092765 | 0.6155554355813031 | T | T | T |
| 0.7006381445744562 | 0.4385262110712290 | 0.4651948045166568 | T | T | T |
| 0.6069377176494670 | 0.4336565037698771 | 0.6079152724088340 | T | T | T |
| 0.6030787067294709 | 0.4452467488688403 | 0.8067047216234662 | T | T | T |
| 0.7287552103338821 | 0.4775708083067388 | 0.7762642836358484 | T | T | T |
| 0.8584966169499419 | 0.6791936040040687 | 0.7551180906249019 | T | T | T |
| 0.8063122104802669 | 0.6568604717314536 | 0.5695285295225194 | T | T | T |
| 0.6873412719561814 | 0.6463858005089684 | 0.4839343813743216 | T | T | T |
| 0.5827115169679455 | 0.6694489387156412 | 0.6010466760028076 | T | T | T |
| 0.5933606097204578 | 0.6625124579453459 | 0.7998550830136945 | T | T | T |
| 0.7187865120881719 | 0.6425669298651455 | 0.7483015808412271 | T | T | T |
| 0.8250385071038145 | 0.5479436032103794 | 0.6897214002967675 | T | T | T |
| 0.5819279575696242 | 0.5511534581297397 | 0.6894477806184305 | T | T | T |
| 0.9308647155641920 | 0.3769778083453201 | 0.9243836191662520 | T | T | T |
| 0.9131510615789834 | 0.5095939263431878 | 0.9284251911630820 | T | T | T |
| 0.9047468538299988 | 0.6405294828679218 | 0.9339527383591706 | T | T | T |
| 0.6975595040448190 | 0.3725680177326103 | 0.8905577707618277 | T | T | T |
| 0.6780693306528434 | 0.4986807943787734 | 0.9538346772759463 | T | T | T |
| 0.6817995895608387 | 0.6326713218659510 | 0.9416992900137878 | T | T | T |
| 0.4913938507452066 | 0.4534640523401656 | 0.7059779445584993 | T | T | T |
| 0.4788961966592755 | 0.6343485502485745 | 0.7113930112328833 | T | T | T |
| 0.6435977326403211 | 0.9385691187496589 | 0.2884635751475773 | T | T | T |
| 0.6989783753399730 | 0.9314801128931638 | 0.1100925792187431 | T | T | T |
| 0.7998748315541098 | 0.9483909024638998 | 0.9809663588340973 | T | T | T |
| 0.8995533741483220 | 0.9294854718632934 | 0.1111666399756178 | T | T | T |
| 0.8966655342880494 | 0.9461814400387082 | 0.3089264215042709 | T | T | T |
| 0.7711200226366743 | 0.9700992493222420 | 0.2650998866722429 | T | T | T |
| 0.6415519644736556 | 0.1715935209690374 | 0.2567094795764843 | T | T | T |
| 0.6977084580387654 | 0.1588380360425360 | 0.0818718800826427 | T | T | T |
| 0.8105156376451553 | 0.1471551231144531 | 0.9799583659610902 | T | T | T |
| 0.9164755198104246 | 0.1671928150198125 | 0.0940281717845002 | T | T | T |
| 0.8967091716660240 | 0.1613247617570202 | 0.2910329468176549 | T | T | T |
| 0.7708185618955262 | 0.1394968891353425 | 0.2455696590588019 | T | T | T |
| 0.6773946397415878 | 0.0510294104560144 | 0.1942180697075861 | T | T | T |
| 0.9183198376779587 | 0.0498158863073467 | 0.1863028523199555 | T | T | T |
| 0.5669036622734869 | 0.8748530234309615 | 0.4192716219626282 | T | T | T |
| 0.5843012037333046 | 0.0053405821397842 | 0.4396164579341371 | T | T | T |
| 0.5971394974530345 | 0.1377431647620314 | 0.4378253561196429 | T | T | T |
| 0.8041338792453114 | 0.8703907548800026 | 0.3903787390761574 | T | T | T |
| 0.8162949723599527 | 0.9963582762207618 | 0.4486909811004047 | T | T | T |
| 0.8113121335837816 | 0.1300799804216216 | 0.4352446321945929 | T | T | T |
| 0.0105117538908205 | 0.9544928851589699 | 0.2170521979637203 | T | T | T |
| 0.0162046482963365 | 0.1375048001258116 | 0.2150178589239871 | T | T | T |

**Structure files (CONTCAR) involved in this work:**

|                    |                    |                    |   |   |   |
|--------------------|--------------------|--------------------|---|---|---|
| 0.8572231886519952 | 0.0532389326205245 | 0.7852140215993170 | T | T | T |
| 0.8007209986740500 | 0.0705399946867328 | 0.6097504456669821 | T | T | T |
| 0.7017807879765601 | 0.0594177646993470 | 0.4765671660769337 | T | T | T |
| 0.6021037454283016 | 0.0736501223163429 | 0.6084191715275283 | T | T | T |
| 0.6027573749187105 | 0.0535866711710146 | 0.8061706139966198 | T | T | T |
| 0.7281498805943372 | 0.0295333749686780 | 0.7638596678144840 | T | T | T |
| 0.8607260116584282 | 0.8332232985141016 | 0.7577018978688657 | T | T | T |
| 0.8036892395949696 | 0.8329098208414158 | 0.5823864258412219 | T | T | T |
| 0.6891646522220553 | 0.8538233653570113 | 0.4873728597714685 | T | T | T |
| 0.5857663143962624 | 0.8295737541495564 | 0.6053433124868448 | T | T | T |
| 0.6033542473284145 | 0.8491740016505351 | 0.8002245792669196 | T | T | T |
| 0.7295861388626232 | 0.8524661030127545 | 0.7444564210432705 | T | T | T |
| 0.8148721323118150 | 0.9469139383042839 | 0.6824488328931952 | T | T | T |
| 0.5807575670828219 | 0.9526112882853304 | 0.6784263707957768 | T | T | T |
| 0.9317283179492212 | 0.1280777209098229 | 0.9048681657590304 | T | T | T |
| 0.9191581030087504 | 0.9986018151891906 | 0.9435014782163426 | T | T | T |
| 0.9017248877317204 | 0.8665131896083047 | 0.9397566261486111 | T | T | T |
| 0.6948799409984409 | 0.1298145872694371 | 0.8877792458872377 | T | T | T |
| 0.6819369863809788 | 0.0029757238353866 | 0.9463386091479425 | T | T | T |
| 0.6974156432892026 | 0.8693943894552225 | 0.9370344646971730 | T | T | T |
| 0.4900371338592751 | 0.0485873392001285 | 0.7128150520160009 | T | T | T |
| 0.4837571477896128 | 0.8657310521490144 | 0.7194569396595180 | T | T | T |
| 0.3595321581680464 | 0.4400431130519540 | 0.7052215230758959 | T | T | T |
| 0.3086311844696802 | 0.4312102377245978 | 0.8865633098350062 | T | T | T |
| 0.2035466314104459 | 0.4516003318971755 | 0.0079150971199103 | T | T | T |
| 0.0976307496937531 | 0.4327439227506731 | 0.8907950821948649 | T | T | T |
| 0.1017328525098729 | 0.4470288418266777 | 0.6924548916568817 | T | T | T |
| 0.2293798586191923 | 0.4616407616711215 | 0.7377865593068647 | T | T | T |
| 0.3516540105919884 | 0.6692127221188376 | 0.7189281405800930 | T | T | T |
| 0.3042422053971715 | 0.6623104568694412 | 0.8999078306765960 | T | T | T |
| 0.1923124657479469 | 0.6471330486615773 | 0.0036834325844518 | T | T | T |
| 0.0878759497207094 | 0.6733133822112154 | 0.8860938035334025 | T | T | T |
| 0.1007599348613614 | 0.6549167872074102 | 0.6890872694606169 | T | T | T |
| 0.2247779355614583 | 0.6390060559669276 | 0.7447471214329894 | T | T | T |
| 0.3189166623942111 | 0.5506762238949544 | 0.7963487772538506 | T | T | T |
| 0.0762372094546726 | 0.5512809050308117 | 0.8109915539673496 | T | T | T |
| 0.4332007618662274 | 0.3778007975106605 | 0.5700140542711708 | T | T | T |
| 0.4214513438547145 | 0.5096177531543904 | 0.5596311990948917 | T | T | T |
| 0.4048181073592353 | 0.6412799333792419 | 0.5441442097461644 | T | T | T |
| 0.1913664940096673 | 0.3683436237893190 | 0.6065505310038775 | T | T | T |
| 0.1856462636238526 | 0.4975576751329114 | 0.5577647670453463 | T | T | T |
| 0.1929303791920410 | 0.6315585062199179 | 0.5503315152668651 | T | T | T |
| 0.9859241583848314 | 0.4535432360983639 | 0.7842740027539205 | T | T | T |
| 0.9831104106861972 | 0.6424650616046542 | 0.7695286678398284 | T | T | T |
| 0.1433517736863341 | 0.5673611237010224 | 0.2118077562859665 | T | T | T |
| 0.2031949733067294 | 0.5602847358593132 | 0.3864802407790202 | T | T | T |
| 0.3014641640535661 | 0.5568354251887787 | 0.5219993878993483 | T | T | T |
| 0.3963273665012339 | 0.5683092088296552 | 0.3832157985270996 | T | T | T |
| 0.4008545544936345 | 0.5593195546080464 | 0.1852253272726988 | T | T | T |
| 0.2740600889940917 | 0.5415481580888997 | 0.2248919206894165 | T | T | T |
| 0.1475219605295331 | 0.3257327734248884 | 0.2346667159767609 | T | T | T |
| 0.1955149334854638 | 0.3551348988291969 | 0.4115865449783802 | T | T | T |
| 0.3086894297743688 | 0.3553107592333959 | 0.5136309342234125 | T | T | T |



**Structure files (CONTCAR) involved in this work:**

|                    |                    |                    |   |   |   |
|--------------------|--------------------|--------------------|---|---|---|
| 0.4085757686124327 | 0.3312173409237746 | 0.3870946238765065 | T | T | T |
| 0.3997270771910888 | 0.3405772830481023 | 0.1901017311502821 | T | T | T |
| 0.2765204344663028 | 0.3533196795936634 | 0.2541746842455164 | T | T | T |
| 0.1848664064997070 | 0.4497331908740606 | 0.2746640141521660 | T | T | T |
| 0.4138651924416608 | 0.4505490317960629 | 0.3003562975237874 | T | T | T |
| 0.0698119492619812 | 0.6246139598389097 | 0.0694563579465218 | T | T | T |
| 0.0845474255595600 | 0.4927509920248027 | 0.0681097693949220 | T | T | T |
| 0.1083543664922388 | 0.3620493820203160 | 0.0535319746813000 | T | T | T |
| 0.3107687892293824 | 0.6333615803706409 | 0.0924754121702796 | T | T | T |
| 0.3218717312659671 | 0.5032383111239150 | 0.0489413310057178 | T | T | T |
| 0.3027520886629623 | 0.3698259211744386 | 0.0597189954342537 | T | T | T |
| 0.5108073111472357 | 0.5425406366403074 | 0.2857159675363974 | T | T | T |
| 0.5152556774607241 | 0.3651334367495678 | 0.2788973679788030 | T | T | T |
| 0.4392678026927704 | 0.7522477010069666 | 0.6376804791992264 | T | T | T |
| 0.1906282981408232 | 0.7488663360994299 | 0.6390972544277125 | T | T | T |
| 0.2718776448037301 | 0.7524781140319139 | 0.0348788452502181 | T | T | T |
| 0.1100958704265145 | 0.7492614672740452 | 0.0446586204116129 | T | T | T |
| 0.0656962428451699 | 0.2484710749431538 | 0.1303337772854657 | T | T | T |
| 0.3085443886916588 | 0.2494259708334408 | 0.1371673507628703 | T | T | T |
| 0.2245354590463007 | 0.2517270661430101 | 0.5297281048846116 | T | T | T |
| 0.3923830424693637 | 0.2531691074438760 | 0.5447910430218685 | T | T | T |
| 0.5588137752664296 | 0.2506058570404002 | 0.3569117106419598 | T | T | T |
| 0.8047326488001356 | 0.2492811407306213 | 0.3517325108092427 | T | T | T |
| 0.7281921479752987 | 0.2502446309079979 | 0.9440353016411815 | T | T | T |
| 0.8916968336123172 | 0.2508365084863091 | 0.9439330153345395 | T | T | T |
| 0.9447277840522386 | 0.7549937193157992 | 0.8578921540183089 | T | T | T |
| 0.6855450990888248 | 0.7507343526240392 | 0.8569992297506123 | T | T | T |
| 0.7664832979834396 | 0.7501390097127233 | 0.4378017240126240 | T | T | T |
| 0.6062741098843533 | 0.7507309367571177 | 0.4500600681299304 | T | T | T |
| 0.9335871775438285 | 0.4578848026403811 | 0.5559530348341435 | T | T | T |
| 0.9393684162419137 | 0.6284883096587515 | 0.5753967042332877 | T | T | T |
| 0.9248187419045065 | 0.5300806429329779 | 0.1954624496097682 | T | T | T |
| 0.8206997017391328 | 0.3322325422477075 | 0.3273368623085712 | T | T | T |
| 0.7962711035397946 | 0.6346669236291175 | 0.6960467029091945 | T | T | T |
| 0.9337603468582181 | 0.4078430763733157 | 0.4236241398893074 | T | T | T |
| 0.8878882398515339 | 0.5418868401316393 | 0.5719626556449723 | T | T | T |
| 0.0574323599680262 | 0.4928337688954921 | 0.4277074726737408 | T | T | T |
| 0.0425617380546250 | 0.5587570185664567 | 0.4037766497303072 | T | T | T |
| 0.9539314008767095 | 0.4390094509668720 | 0.6162618563297511 | T | T | T |
| 0.0988112299691945 | 0.4664813177093249 | 0.3923594146061657 | T | T | T |
| 0.0322505399614007 | 0.4667190938983571 | 0.4880294298435637 | T | T | T |
| 1.0029459455590033 | 0.5849300226009569 | 0.4438058235943926 | T | T | T |
| 0.0241960125943194 | 0.5543641586773408 | 0.3007280385577671 | T | T | T |
| 0.0829223494427664 | 0.5910756619286596 | 0.3759099869627969 | T | T | T |
| 0.9602139377132646 | 0.6354197334373102 | 0.6427266062602408 | T | T | T |
| 0.9028033012583585 | 0.6620497634989013 | 0.5709771134076862 | T | T | T |

**Figure S15(b) CH<sub>4</sub>+Zn-CH<sub>3</sub>+O<sub>M</sub>-H**

Si O Al Zn C H

1.0000000000000000

20.0219999999999985 0.0000000000000000 0.0000000000000000

0.0000000000000000 19.8990000000000009 0.0000000000000000

0.0000000000000000 0.0000000000000000 13.3829999999999991

94 193 2 2 2 8

**Structure files (CONTCAR) involved in this work:**

## Selective dynamics

## Direct

|                    |                    |                    |   |   |   |
|--------------------|--------------------|--------------------|---|---|---|
| 0.4218098986542517 | 0.0600811471805169 | 0.6485167191610147 | T | T | T |
| 0.3043939877075508 | 0.0319646086030197 | 0.7921227775613494 | T | T | T |
| 0.2814707586683062 | 0.0570457728531062 | 0.0170433553340960 | T | T | T |
| 0.1215794195678927 | 0.0643283931631171 | 0.0121189870688750 | T | T | T |
| 0.0672961285024456 | 0.0310945235641922 | 0.8005894725645185 | T | T | T |
| 0.1798952829573534 | 0.0646849197814894 | 0.6643796803821900 | T | T | T |
| 0.4182930937242437 | 0.8274659466442223 | 0.6691818519865922 | T | T | T |
| 0.3005146622455517 | 0.8732073713450739 | 0.8012677128084515 | T | T | T |
| 0.2668343810392522 | 0.8306336480618057 | 0.0204119192241828 | T | T | T |
| 0.1110164229480253 | 0.8264367330995471 | 0.0139047697901381 | T | T | T |
| 0.0655653026733187 | 0.8739341139112811 | 0.7997703603719112 | T | T | T |
| 0.1787067191396036 | 0.8290173741221986 | 0.6655148325274679 | T | T | T |
| 0.0752318433304149 | 0.9417612174988468 | 0.1486519770046319 | T | T | T |
| 0.1940299619889110 | 0.9703235798425820 | 0.2906617565975342 | T | T | T |
| 0.2162988671483732 | 0.9433972263711534 | 0.5160245088730320 | T | T | T |
| 0.3766762117052543 | 0.9354029005460173 | 0.5136459394207689 | T | T | T |
| 0.4327995563305437 | 0.9689591124860463 | 0.3015030076239626 | T | T | T |
| 0.3193160436630367 | 0.9359292067389221 | 0.1643215128016293 | T | T | T |
| 0.0804732924423608 | 0.1739539022694516 | 0.1668502807131843 | T | T | T |
| 0.1973391272574737 | 0.1292451330251270 | 0.3010906684533329 | T | T | T |
| 0.2309243278313176 | 0.1698128864374011 | 0.5188806306715723 | T | T | T |
| 0.3864243577367141 | 0.1738497125322333 | 0.5092823084559874 | T | T | T |
| 0.4348035434404521 | 0.1274111681250151 | 0.2961552535285221 | T | T | T |
| 0.3186366845732991 | 0.1725565477391663 | 0.1664864322228512 | T | T | T |
| 0.5769092349485825 | 0.5559392284799094 | 0.3542539003440869 | T | T | T |
| 0.6907572907527398 | 0.5276150379618149 | 0.2024207257465252 | T | T | T |
| 0.7146979178075392 | 0.5678348829432824 | 0.9861655030965459 | T | T | T |
| 0.8742825108891124 | 0.5693479812423748 | 0.9866530482608228 | T | T | T |
| 0.9251545747389420 | 0.5280636830270208 | 0.1947444686960111 | T | T | T |
| 0.8126409926787906 | 0.5531797568693595 | 0.3417963764714514 | T | T | T |
| 0.5733179950303401 | 0.3292530685228597 | 0.3320913452259259 | T | T | T |
| 0.6947659664093608 | 0.3732680900199322 | 0.1949626028007582 | T | T | T |
| 0.7320043221988902 | 0.3277254775206712 | 0.9786286698657112 | T | T | T |
| 0.8866263133310734 | 0.3256038518695182 | 0.9841124401465647 | T | T | T |
| 0.9392786706612603 | 0.3720100499299174 | 0.1896975194363531 | T | T | T |
| 0.9205891744278248 | 0.4447545850038598 | 0.8554452888929847 | T | T | T |
| 0.7993113720959214 | 0.4737657688963910 | 0.7182665218184001 | T | T | T |
| 0.7802512068526812 | 0.4370277639494933 | 0.4925223244771574 | T | T | T |
| 0.6226602484363118 | 0.4298937678834538 | 0.4876522039084561 | T | T | T |
| 0.5710019892719245 | 0.4696272521523893 | 0.6995319648494173 | T | T | T |
| 0.6753275690257391 | 0.4468246824655160 | 0.8567751431938334 | T | T | T |
| 0.9211490872483979 | 0.6768883575609138 | 0.8346965877382132 | T | T | T |
| 0.7668947559256498 | 0.6698340050965218 | 0.4659818608235834 | T | T | T |
| 0.6121370605745394 | 0.6733452648149458 | 0.4868208804836471 | T | T | T |
| 0.5598096102294511 | 0.6277990333426465 | 0.6977552512682039 | T | T | T |
| 0.6705358129978011 | 0.6751516745717103 | 0.8283427890135630 | T | T | T |
| 0.5771075509639774 | 0.9454683809113865 | 0.3581931385471868 | T | T | T |
| 0.6975851076914849 | 0.9741916613694641 | 0.2156956328600354 | T | T | T |
| 0.7189158811109286 | 0.9393228122900512 | 0.9936505920883227 | T | T | T |
| 0.8785639327586778 | 0.9348650049843112 | 0.9950082860069496 | T | T | T |
| 0.9304298559127901 | 0.9718998427822795 | 0.2053075419563934 | T | T | T |

**Structure files (CONTCAR) involved in this work:**

|                    |                    |                    |   |   |   |
|--------------------|--------------------|--------------------|---|---|---|
| 0.8215845490564594 | 0.9460525454620698 | 0.3547841586630768 | T | T | T |
| 0.5779494883954955 | 0.1742795931609318 | 0.3298696586188355 | T | T | T |
| 0.6970957128053321 | 0.1320828172411307 | 0.1937912950037163 | T | T | T |
| 0.7323410249571771 | 0.1711349836466667 | 0.9725969265120163 | T | T | T |
| 0.8869096794523175 | 0.1729400790761136 | 0.9830739086413317 | T | T | T |
| 0.9347255050325326 | 0.1304133858792996 | 0.1985209101563695 | T | T | T |
| 0.8185215616265561 | 0.1734600664837852 | 0.3324864283155220 | T | T | T |
| 0.9229952669269404 | 0.0538257559998063 | 0.8557646863054874 | T | T | T |
| 0.8013705194020997 | 0.0252467810415685 | 0.7112414580593126 | T | T | T |
| 0.7806548884005929 | 0.0643597810847101 | 0.4928223991549555 | T | T | T |
| 0.6204502808718545 | 0.0698328397783677 | 0.4900667235100810 | T | T | T |
| 0.5672407544324037 | 0.0326977983698827 | 0.6988813735059854 | T | T | T |
| 0.6777151361826130 | 0.0541503501646514 | 0.8496697737950084 | T | T | T |
| 0.9224312521534018 | 0.8295508134630663 | 0.8389374272001427 | T | T | T |
| 0.8027469344092236 | 0.8674651289921554 | 0.6962026753380008 | T | T | T |
| 0.7683844186109623 | 0.8273162832277309 | 0.4779794865964900 | T | T | T |
| 0.6135496937935626 | 0.8272099627592459 | 0.4902535650953898 | T | T | T |
| 0.5630370896208472 | 0.8755628744157834 | 0.6981611505690893 | T | T | T |
| 0.6778026696606962 | 0.8331462551608466 | 0.8341718968124395 | T | T | T |
| 0.4238511887823649 | 0.4423039990099150 | 0.6426325317336471 | T | T | T |
| 0.3060181625736143 | 0.4693985509168186 | 0.7874709114886154 | T | T | T |
| 0.2806250122417080 | 0.4448908577455103 | 0.0120908715564247 | T | T | T |
| 0.1228021276885353 | 0.4363893175838526 | 0.0115443987491457 | T | T | T |
| 0.0647494579019921 | 0.4703266698287814 | 0.8016394227144574 | T | T | T |
| 0.1781372450291857 | 0.4366261556114766 | 0.6627306563436586 | T | T | T |
| 0.4148193159651642 | 0.6736521943373091 | 0.6665243481613041 | T | T | T |
| 0.3000260688622685 | 0.6277811893024767 | 0.8001912372047361 | T | T | T |
| 0.2668522087980830 | 0.6693474469201531 | 0.0194586460063368 | T | T | T |
| 0.1113416377494277 | 0.6726993714726104 | 0.0106746444292448 | T | T | T |
| 0.0642135787794649 | 0.6288819257305274 | 0.7965963794303043 | T | T | T |
| 0.1790623073722847 | 0.6717352943708886 | 0.6640041358439983 | T | T | T |
| 0.0717963349152102 | 0.5576968942074001 | 0.1472805501588509 | T | T | T |
| 0.1909394661806361 | 0.5310086564993731 | 0.2889933844830767 | T | T | T |
| 0.2146220441956620 | 0.5567914582729961 | 0.5147769280425081 | T | T | T |
| 0.3735087622871729 | 0.5663733353197052 | 0.5130398885037744 | T | T | T |
| 0.4291758369805723 | 0.5306090321453343 | 0.3042596355582038 | T | T | T |
| 0.3184795131526247 | 0.5637505244681901 | 0.1622661714369058 | T | T | T |
| 0.0846302847870799 | 0.3271115606117023 | 0.1606117994645997 | T | T | T |
| 0.1966657521832541 | 0.3723416059106509 | 0.2998264461081511 | T | T | T |
| 0.2298620386274258 | 0.3311189029139039 | 0.5188654556220813 | T | T | T |
| 0.3844685927353610 | 0.3274886171069066 | 0.5064178795625961 | T | T | T |
| 0.4297262618234144 | 0.3736417251437785 | 0.2944596035593031 | T | T | T |
| 0.3163731950256429 | 0.3301631428525828 | 0.1618836862560663 | T | T | T |
| 0.3581503305634258 | 0.0706026478450066 | 0.7220183613869635 | T | T | T |
| 0.3155993167310367 | 0.0543947029266743 | 0.9071427450551350 | T | T | T |
| 0.2011052396209048 | 0.0498204349617292 | 0.0081814997863052 | T | T | T |
| 0.0916925247205587 | 0.0703880327775002 | 0.9002339380669671 | T | T | T |
| 0.1031883299355744 | 0.0637913377793648 | 0.7032525698782749 | T | T | T |
| 0.2288242565123521 | 0.0520030094144674 | 0.7596696129894405 | T | T | T |
| 0.3592896984320591 | 0.8280920470149495 | 0.7523247429574854 | T | T | T |
| 0.3005944457198762 | 0.8619307975115361 | 0.9207248973464152 | T | T | T |
| 0.1882511478931127 | 0.8510927170419802 | 0.0241093055789520 | T | T | T |
| 0.0883212385013709 | 0.8320756958422980 | 0.8981063435306607 | T | T | T |

**Structure files (CONTCAR) involved in this work:**

|                    |                    |                    |   |   |   |
|--------------------|--------------------|--------------------|---|---|---|
| 0.1019558827489229 | 0.8413102935378957 | 0.7020991422538877 | T | T | T |
| 0.2282467611699702 | 0.8509941601940068 | 0.7565257555375502 | T | T | T |
| 0.3153537161319950 | 0.9516164450159581 | 0.7763547763412749 | T | T | T |
| 0.0877912860557019 | 0.9521125546747419 | 0.8110412473580103 | T | T | T |
| 0.4321207572421550 | 0.1275285236065830 | 0.5817880639253900 | T | T | T |
| 0.4116544164416985 | 0.9963580569424610 | 0.5744437824303570 | T | T | T |
| 0.3929474250963215 | 0.8643101600653011 | 0.5678001450975375 | T | T | T |
| 0.1953488343977013 | 0.1380059577002051 | 0.6167087635975432 | T | T | T |
| 0.1896535148326639 | 0.0059687692717850 | 0.5819576125930968 | T | T | T |
| 0.1940398885379947 | 0.8723142507601052 | 0.5654692091685054 | T | T | T |
| 0.9873377192388795 | 0.0394851646237163 | 0.7851572620314461 | T | T | T |
| 0.9849599277552503 | 0.8690385760354635 | 0.7870767230539457 | T | T | T |
| 0.1394282811453445 | 0.9322614360800954 | 0.2214177985306580 | T | T | T |
| 0.1828254152657941 | 0.9484042754623523 | 0.4059659122452056 | T | T | T |
| 0.2968612913534908 | 0.9478306056026550 | 0.5084938937693878 | T | T | T |
| 0.4071159904799175 | 0.9315318598298711 | 0.4020264474591336 | T | T | T |
| 0.3956353942668761 | 0.9367752282986352 | 0.2048608112274100 | T | T | T |
| 0.2692675261242403 | 0.9489007033021931 | 0.2583017018050571 | T | T | T |
| 0.1393166765563781 | 0.1742267695044543 | 0.2502380362414263 | T | T | T |
| 0.1940608496727654 | 0.1397627227130715 | 0.4207462285626979 | T | T | T |
| 0.3092627304819399 | 0.1482380150690386 | 0.5157202752101824 | T | T | T |
| 0.4126511147543747 | 0.1687547741540955 | 0.3952434903522827 | T | T | T |
| 0.3956630801361771 | 0.1587323707684524 | 0.2000382631185836 | T | T | T |
| 0.2704037340692271 | 0.1524864872366868 | 0.2602835776424151 | T | T | T |
| 0.1841454952314567 | 0.0507420879319953 | 0.2743306362399333 | T | T | T |
| 0.4153198425698906 | 0.0486699653646920 | 0.3096139132849349 | T | T | T |
| 0.0643956083128208 | 0.8728397806958993 | 0.0851267548400824 | T | T | T |
| 0.0850231974533908 | 0.0032228056464958 | 0.0704894386080060 | T | T | T |
| 0.1060961722761109 | 0.1348236089554957 | 0.0677283959284340 | T | T | T |
| 0.3047306777866154 | 0.8623295206229916 | 0.1164682107350027 | T | T | T |
| 0.3101061046542448 | 0.9945584131756499 | 0.0814889772560752 | T | T | T |
| 0.3005789660390278 | 0.1282752494632470 | 0.0684604931473814 | T | T | T |
| 0.5123795869201317 | 0.9566998826007379 | 0.2871095821208864 | T | T | T |
| 0.5149019028475798 | 0.1348020751542428 | 0.2794909992325634 | T | T | T |
| 0.6371072186209478 | 0.5641397333207637 | 0.2745765611941673 | T | T | T |
| 0.6997265338254697 | 0.5748272627271591 | 0.1048060213211491 | T | T | T |
| 0.7947348229449285 | 0.5608917441670522 | 0.9654346069533816 | T | T | T |
| 0.8892396048944589 | 0.5713209012793894 | 0.1064742317555201 | T | T | T |
| 0.8886846755694983 | 0.5430572231286509 | 0.3026110179297519 | T | T | T |
| 0.7622901316303293 | 0.5242823876771905 | 0.2601476016869463 | T | T | T |
| 0.6373360807512904 | 0.3356133990972171 | 0.2600305871976842 | T | T | T |
| 0.6968588550431800 | 0.3360921073621574 | 0.0865732549847910 | T | T | T |
| 0.8097233409878932 | 0.3525781987045871 | 0.9829501216294783 | T | T | T |
| 0.9146175387582917 | 0.3254011261879195 | 0.0973167550494769 | T | T | T |
| 0.9057027441535052 | 0.3465201783076097 | 0.2918038111101405 | T | T | T |
| 0.7656181695864726 | 0.3707245809888790 | 0.2500890762374742 | T | T | T |
| 0.6699076759075048 | 0.4511381819403119 | 0.1763012691549706 | T | T | T |
| 0.9180634750129213 | 0.4496290596124946 | 0.1657153754131524 | T | T | T |
| 0.5672153714967720 | 0.6266623260851021 | 0.4133532563997532 | T | T | T |
| 0.5939975746124607 | 0.4977457860882757 | 0.4357649336042375 | T | T | T |
| 0.5870937366109886 | 0.3641317931868600 | 0.4406606823178947 | T | T | T |
| 0.7998396993673758 | 0.6315201351254908 | 0.3698309326638650 | T | T | T |
| 0.8024546001761428 | 0.5135171285323006 | 0.4509688308163560 | T | T | T |

**Structure files (CONTCAR) involved in this work:**

|                    |                    |                    |   |   |   |
|--------------------|--------------------|--------------------|---|---|---|
| 0.8316022675500105 | 0.3837366118161792 | 0.4414720124581816 | T | T | T |
| 0.0029044760315169 | 0.5492114559248077 | 0.2106212053907246 | T | T | T |
| 0.0202320321909923 | 0.3693424473035038 | 0.1981069790372707 | T | T | T |
| 0.8554304628584148 | 0.4360037149905710 | 0.7842867197287704 | T | T | T |
| 0.7917989636086921 | 0.4352570836118415 | 0.6116634919065016 | T | T | T |
| 0.7029600017427686 | 0.4242328696414737 | 0.4646191958768781 | T | T | T |
| 0.6088260809531554 | 0.4319991944893727 | 0.6069008830427274 | T | T | T |
| 0.6022458645088637 | 0.4443679701132774 | 0.8049472036400679 | T | T | T |
| 0.7279210263863999 | 0.4736283111308297 | 0.7730027559362116 | T | T | T |
| 0.8596692194785475 | 0.6789991555616759 | 0.7589155425044913 | T | T | T |
| 0.8110477378108755 | 0.6464148444170845 | 0.5645274004592736 | T | T | T |
| 0.6897623383069230 | 0.6469894000551896 | 0.4827698699130615 | T | T | T |
| 0.5842943007705181 | 0.6691150682018168 | 0.5997610679893557 | T | T | T |
| 0.5925500013044426 | 0.6612865371031971 | 0.7971657220933467 | T | T | T |
| 0.7174123845898129 | 0.6526493421077026 | 0.7363202950474357 | T | T | T |
| 0.8221352346677407 | 0.5510484387916608 | 0.6953307973999915 | T | T | T |
| 0.5822709587082937 | 0.5498535971118218 | 0.6855227480592883 | T | T | T |
| 0.9322779564258846 | 0.3745372404663450 | 0.9145584460868764 | T | T | T |
| 0.9123298622569671 | 0.5056543572357872 | 0.9354709058140471 | T | T | T |
| 0.9024856361521102 | 0.6386349561496756 | 0.9392895698852087 | T | T | T |
| 0.6935306127560081 | 0.3720362832794599 | 0.8946802423126754 | T | T | T |
| 0.6766594540133455 | 0.5000138963053040 | 0.9486664704229949 | T | T | T |
| 0.6865373103125425 | 0.6338235120412631 | 0.9305747173679275 | T | T | T |
| 0.4923469468628201 | 0.4512331740455569 | 0.7052057149847971 | T | T | T |
| 0.4789607086278871 | 0.6316747975627208 | 0.7070084944975564 | T | T | T |
| 0.6430798824627446 | 0.9395088972760723 | 0.2888037929429667 | T | T | T |
| 0.6983549464267064 | 0.9336624350224217 | 0.1104725810414848 | T | T | T |
| 0.7991979403819343 | 0.9483784232337950 | 0.9805719617631925 | T | T | T |
| 0.8978239585400931 | 0.9304246929158531 | 0.1124296115601137 | T | T | T |
| 0.8968112765966793 | 0.9480030377583843 | 0.3098664940306508 | T | T | T |
| 0.7709879316329662 | 0.9688181211369445 | 0.2662254366597202 | T | T | T |
| 0.6398809565783462 | 0.1740939507075566 | 0.2523101116241420 | T | T | T |
| 0.6960726872166038 | 0.1569666017822010 | 0.0786390907755362 | T | T | T |
| 0.8098772060745922 | 0.1466835012742331 | 0.9796751128349934 | T | T | T |
| 0.9137132349789967 | 0.1699089863342682 | 0.0970627634825645 | T | T | T |
| 0.8954005450301101 | 0.1610129055064349 | 0.2941132088071978 | T | T | T |
| 0.7698702639448741 | 0.1447334309255333 | 0.2433528232703718 | T | T | T |
| 0.6784374118375317 | 0.0525256484233786 | 0.1985290627841701 | T | T | T |
| 0.9172566555162187 | 0.0512002287433173 | 0.1853270910273666 | T | T | T |
| 0.5682883722983363 | 0.8756187567982954 | 0.4201962501792681 | T | T | T |
| 0.5817293751773392 | 0.0073086754656020 | 0.4373433872799040 | T | T | T |
| 0.5996997589969437 | 0.1393662248424323 | 0.4348588939480234 | T | T | T |
| 0.8064565337114443 | 0.8699342254165733 | 0.3923718443580766 | T | T | T |
| 0.8154617472609238 | 0.9964038909296653 | 0.4495732798137156 | T | T | T |
| 0.8069114699992362 | 0.1300876236254709 | 0.4345203065073081 | T | T | T |
| 0.0096133720700833 | 0.9558486236251608 | 0.2161018001892841 | T | T | T |
| 0.0148078068090839 | 0.1389972406555050 | 0.2156664568825853 | T | T | T |
| 0.8566515176115573 | 0.0555486645219765 | 0.7868968636780507 | T | T | T |
| 0.8008708160216226 | 0.0703434389808924 | 0.6101723052878489 | T | T | T |
| 0.7001249193978241 | 0.0569575867209703 | 0.4804189947235070 | T | T | T |
| 0.5982213133000408 | 0.0759169791076071 | 0.6064737770983645 | T | T | T |
| 0.6028186910467505 | 0.0528862004891586 | 0.8035540388170762 | T | T | T |
| 0.7281978730602745 | 0.0279995100519744 | 0.7629494435052063 | T | T | T |

**Structure files (CONTCAR) involved in this work:**

|                    |                    |                    |   |   |   |
|--------------------|--------------------|--------------------|---|---|---|
| 0.8601467647185197 | 0.8316483207634172 | 0.7619992496617364 | T | T | T |
| 0.8047476126556918 | 0.8337788400682393 | 0.5857690015990719 | T | T | T |
| 0.6911457655895306 | 0.8521501804146439 | 0.4863062957402466 | T | T | T |
| 0.5874710802398776 | 0.8292801646160431 | 0.6049256583150863 | T | T | T |
| 0.6026212626452871 | 0.8536353307968485 | 0.7989304781616099 | T | T | T |
| 0.7297274459815837 | 0.8549275026993741 | 0.7459145245972342 | T | T | T |
| 0.8182301658217691 | 0.9472128663526520 | 0.6860451291341213 | T | T | T |
| 0.5785144876602142 | 0.9536816373708277 | 0.6723505810331551 | T | T | T |
| 0.9323027494033140 | 0.1261476798193110 | 0.9105093285328334 | T | T | T |
| 0.9189152214987863 | 0.9960866600352213 | 0.9417971649278727 | T | T | T |
| 0.9005074111732243 | 0.8642582137839162 | 0.9439024663596353 | T | T | T |
| 0.6951561694278884 | 0.1302811287792685 | 0.8837079476819745 | T | T | T |
| 0.6817605193250152 | 0.0046474573998091 | 0.9461849932873594 | T | T | T |
| 0.6955462325802994 | 0.8709836315361660 | 0.9380724584786110 | T | T | T |
| 0.4883973926486967 | 0.0483902150482563 | 0.7148913424195251 | T | T | T |
| 0.4834542087711424 | 0.8647722661620509 | 0.7159819358897156 | T | T | T |
| 0.3614455564948696 | 0.4317362673992620 | 0.7188765654373203 | T | T | T |
| 0.3156925181651841 | 0.4465872123642620 | 0.9027638292652485 | T | T | T |
| 0.2007296178261279 | 0.4576773052568718 | 0.0015019708337982 | T | T | T |
| 0.0886091610362839 | 0.4322092497622417 | 0.9021871032283819 | T | T | T |
| 0.1021948330103187 | 0.4375437015251278 | 0.7056942222361100 | T | T | T |
| 0.2306067838610059 | 0.4493959955320604 | 0.7534806635899139 | T | T | T |
| 0.3578263661291789 | 0.6748418003795698 | 0.7528074277927768 | T | T | T |
| 0.3002355802042445 | 0.6376911745680351 | 0.9197836225319809 | T | T | T |
| 0.1884118324376500 | 0.6479885022526621 | 0.0230402993428781 | T | T | T |
| 0.0897734888380004 | 0.6699007818028757 | 0.8940347210168337 | T | T | T |
| 0.1019163564061746 | 0.6581057266905339 | 0.6976978844843698 | T | T | T |
| 0.2272414578575944 | 0.6489276363085124 | 0.7561550483824754 | T | T | T |
| 0.3163224474783968 | 0.5499499674927346 | 0.7728970575528243 | T | T | T |
| 0.0827559906755248 | 0.5497799741609977 | 0.8098711834251328 | T | T | T |
| 0.4322655886405860 | 0.3764422039510619 | 0.5718276121360851 | T | T | T |
| 0.4135655852668931 | 0.5082129248124909 | 0.5729142930348741 | T | T | T |
| 0.3842078520493740 | 0.6387752494581656 | 0.5664934370067377 | T | T | T |
| 0.1917001968063899 | 0.3631312717358379 | 0.6145225101910617 | T | T | T |
| 0.1835479852531871 | 0.4957047993340527 | 0.5797410566796405 | T | T | T |
| 0.1959674436843285 | 0.6289936293618287 | 0.5638487485869655 | T | T | T |
| 0.9849002501588519 | 0.4600013282903535 | 0.7843515988591266 | T | T | T |
| 0.9842601279485761 | 0.6377487142648985 | 0.7816350089953240 | T | T | T |
| 0.1339111924389619 | 0.5688843344926401 | 0.2235807157454212 | T | T | T |
| 0.1817624632981298 | 0.5539362131416550 | 0.4042315853668066 | T | T | T |
| 0.2948773893711166 | 0.5471295046503606 | 0.5092432375643221 | T | T | T |
| 0.4030834562403810 | 0.5720219644656991 | 0.4009834625788659 | T | T | T |
| 0.3941854821746594 | 0.5621555136044006 | 0.2054676849829615 | T | T | T |
| 0.2655936057553436 | 0.5515963526899473 | 0.2529571787434991 | T | T | T |
| 0.1396189189457849 | 0.3258354795466422 | 0.2496680176227514 | T | T | T |
| 0.1953626089866121 | 0.3610564750456597 | 0.4190636502258350 | T | T | T |
| 0.3079344047541690 | 0.3535557548412616 | 0.5200549370183916 | T | T | T |
| 0.4053082305689875 | 0.3288994777451689 | 0.3893098965131249 | T | T | T |
| 0.3932845926632265 | 0.3468257337235217 | 0.1932064998224537 | T | T | T |
| 0.2696377082320639 | 0.3515452244153699 | 0.2565211385988323 | T | T | T |
| 0.1807802598227076 | 0.4505761747622524 | 0.2742625389152719 | T | T | T |
| 0.4094710650527450 | 0.4516146055708279 | 0.3158127713648796 | T | T | T |
| 0.0638454931337056 | 0.6237420238316651 | 0.0766953409635367 | T | T | T |

**Structure files (CONTCAR) involved in this work:**

|                    |                    |                    |   |   |   |
|--------------------|--------------------|--------------------|---|---|---|
| 0.0831755455069312 | 0.4918918147233098 | 0.0778109099465563 | T | T | T |
| 0.1168282523047337 | 0.3625346767315885 | 0.0620412279339534 | T | T | T |
| 0.3053790084681040 | 0.6376408750873392 | 0.1148656082173253 | T | T | T |
| 0.3115730477236003 | 0.5051202519425451 | 0.0788901131737305 | T | T | T |
| 0.2954423498510417 | 0.3722034745574903 | 0.0626530386701623 | T | T | T |
| 0.5094444506439184 | 0.5381262542777246 | 0.2932364226494465 | T | T | T |
| 0.5097805565655388 | 0.3661731008652745 | 0.2790936896976804 | T | T | T |
| 0.4363202734163300 | 0.7502329508185798 | 0.6407831975889527 | T | T | T |
| 0.1898812167465588 | 0.7504286628910478 | 0.6376984741807423 | T | T | T |
| 0.2754682949073324 | 0.7499268813000907 | 0.0213619860882813 | T | T | T |
| 0.1030991523188145 | 0.7491224514868832 | 0.0506452223002220 | T | T | T |
| 0.0639596544965170 | 0.2506037748558643 | 0.1336042447380539 | T | T | T |
| 0.3079814085160301 | 0.2509194299758449 | 0.1369314597974310 | T | T | T |
| 0.2228979293059939 | 0.2504736417691550 | 0.5230830592614979 | T | T | T |
| 0.3919501019292916 | 0.2511209482917717 | 0.5470077163573033 | T | T | T |
| 0.5562113764960740 | 0.2510641311230150 | 0.3535426046037535 | T | T | T |
| 0.8046715610909222 | 0.2507708894849598 | 0.3561669553105067 | T | T | T |
| 0.7278823620195715 | 0.2499907185100030 | 0.9435630315183744 | T | T | T |
| 0.8913354048765106 | 0.2495114023670952 | 0.9412975670056470 | T | T | T |
| 0.9445023860679549 | 0.7529043573057067 | 0.8634452198532506 | T | T | T |
| 0.6814888825895350 | 0.7536361255980379 | 0.8560468693388202 | T | T | T |
| 0.7723355991358073 | 0.7490297884673219 | 0.4444787566374839 | T | T | T |
| 0.6079670144396421 | 0.7506182059672831 | 0.4488244800784073 | T | T | T |
| 0.9290747404086755 | 0.4934436213496829 | 0.5346299968637888 | T | T | T |
| 0.8227506430552306 | 0.3329381880767541 | 0.3286608727729763 | T | T | T |
| 0.7971415330342607 | 0.6374979374582606 | 0.6982724847933293 | T | T | T |
| 0.9334996138885856 | 0.4025593215563750 | 0.4515429696085360 | T | T | T |
| 0.8697846281361048 | 0.5635994192444970 | 0.5594670005990838 | T | T | T |
| 0.9742174821268226 | 0.6521941541608920 | 0.4872831725960142 | T | T | T |
| 0.0303317202366335 | 0.3925392312574426 | 0.4443957800601685 | T | T | T |
| 0.0541224868764624 | 0.4098203615964481 | 0.5137291792309083 | T | T | T |
| 0.0468183920070241 | 0.4251456151812223 | 0.3826818915647399 | T | T | T |
| 0.0461020548933864 | 0.3409276732212285 | 0.4283383641836525 | T | T | T |
| 0.9717900125736595 | 0.4953329077554143 | 0.5693344627602069 | T | T | T |
| 0.9921318520777178 | 0.6203695094867672 | 0.5488182584382741 | T | T | T |
| 0.9685191132535952 | 0.6224628410588210 | 0.4187897148159364 | T | T | T |
| 0.9269907268946174 | 0.6769099981937013 | 0.5074273353229521 | T | T | T |
| 1.0114136391445843 | 0.6918684426041968 | 0.4754342458783595 | T | T | T |

**Figure S15(b) TSI**

Si O Al Zn C H

1.0000000000000000

20.0219999999999985 0.0000000000000000 0.0000000000000000

0.0000000000000000 19.8990000000000009 0.0000000000000000

0.0000000000000000 0.0000000000000000 13.3829999999999991

94 193 2 2 2 8

Selective dynamics

Direct

0.4215068136431224 0.0603524799730895 0.6484371054547392 T T T

0.3038455058465166 0.0325407394245451 0.7916075308670764 T T T

0.2810766224408792 0.0569160813189011 0.0169043534535128 T T T

0.1211014396932224 0.0649826651089821 0.0122822542689097 T T T

0.0670808910925934 0.0315782511431409 0.8004781772637842 T T T

0.1795614194778122 0.0659292559367922 0.6644433237387252 T T T

**Structure files (CONTCAR) involved in this work:**

|                    |                    |                    |   |   |   |
|--------------------|--------------------|--------------------|---|---|---|
| 0.4174626086290680 | 0.8278095154742339 | 0.6683992064740645 | T | T | T |
| 0.2989455577394753 | 0.8737926710806548 | 0.7992337516118048 | T | T | T |
| 0.2664523615653023 | 0.8306743645928183 | 0.0183939536877704 | T | T | T |
| 0.1104980692210622 | 0.8267027239548577 | 0.0127466296844277 | T | T | T |
| 0.0651022856761485 | 0.8747968412522771 | 0.7989711256097727 | T | T | T |
| 0.1772005288986711 | 0.8293996337616434 | 0.6637776185388994 | T | T | T |
| 0.0746231194016571 | 0.9418893894971314 | 0.1483708440710827 | T | T | T |
| 0.1937271672105148 | 0.9702050362692490 | 0.2898307629190603 | T | T | T |
| 0.2157210748522760 | 0.9442836814441614 | 0.5159029652752106 | T | T | T |
| 0.3762082868262577 | 0.9359235047656628 | 0.5129315681804136 | T | T | T |
| 0.4318659007701247 | 0.9697924749876543 | 0.3002201188160827 | T | T | T |
| 0.3185423465182271 | 0.9350796078259911 | 0.1638238810586307 | T | T | T |
| 0.0797966726103365 | 0.1740485284356107 | 0.1673273586882049 | T | T | T |
| 0.1976915852659906 | 0.1288368955982478 | 0.2992513392828650 | T | T | T |
| 0.2304198854052237 | 0.1698691812300157 | 0.5171142239085237 | T | T | T |
| 0.3864141484362472 | 0.1743089009074372 | 0.5095800229561823 | T | T | T |
| 0.4342018544286089 | 0.1281490571752304 | 0.2956820822812528 | T | T | T |
| 0.3188116324916588 | 0.1732573469815437 | 0.1649126827598826 | T | T | T |
| 0.5753997348075678 | 0.5575722746120831 | 0.3519891499103063 | T | T | T |
| 0.6901745720719271 | 0.5279895854710424 | 0.2051989660667951 | T | T | T |
| 0.7152726291592705 | 0.5675201396480208 | 0.9864522839812071 | T | T | T |
| 0.8740884170891429 | 0.5706392273791646 | 0.9840122492667933 | T | T | T |
| 0.9234902751493925 | 0.5283358707477680 | 0.1919832243617127 | T | T | T |
| 0.8128694528781164 | 0.5542301813379167 | 0.3449757270673336 | T | T | T |
| 0.5736621706598850 | 0.3297286894346942 | 0.3303628540885500 | T | T | T |
| 0.6928630149029145 | 0.3737972545934881 | 0.1916433520730639 | T | T | T |
| 0.7324515960164006 | 0.3290668175484802 | 0.9752674344941655 | T | T | T |
| 0.8873263982278990 | 0.3255756963416898 | 0.9829611054818178 | T | T | T |
| 0.9393160241811621 | 0.3725088283221680 | 0.1883271553459192 | T | T | T |
| 0.9205671148081159 | 0.4455958081806249 | 0.8543100786598203 | T | T | T |
| 0.8005456100630727 | 0.4758441841234960 | 0.7148591332655353 | T | T | T |
| 0.7828499121697484 | 0.4386153312432123 | 0.4924720734749483 | T | T | T |
| 0.6247118463718059 | 0.4323483712972666 | 0.4845458021571956 | T | T | T |
| 0.5721390102768293 | 0.4705159337420191 | 0.6969993857168788 | T | T | T |
| 0.6777098541803601 | 0.4483680471102550 | 0.8533698525215173 | T | T | T |
| 0.9209527505607362 | 0.6774807825291104 | 0.8331440852866147 | T | T | T |
| 0.7645278718037608 | 0.6721651707051371 | 0.4652457176242416 | T | T | T |
| 0.6100451941831394 | 0.6744473491678129 | 0.4846763449608082 | T | T | T |
| 0.5594053263155275 | 0.6286515078566272 | 0.6965174874131498 | T | T | T |
| 0.6691477590964914 | 0.6736865836359656 | 0.8311295731759917 | T | T | T |
| 0.5760123887100198 | 0.9466336460244630 | 0.3573570914901073 | T | T | T |
| 0.6963859580940994 | 0.9747497224595257 | 0.2145746097966710 | T | T | T |
| 0.7180377651497917 | 0.9388945465138229 | 0.9932511244193913 | T | T | T |
| 0.8775312399711215 | 0.9343822606923888 | 0.9938627353871204 | T | T | T |
| 0.9294407451024640 | 0.9717158032760885 | 0.2036625155822921 | T | T | T |
| 0.8204993111634189 | 0.9477430621828371 | 0.3539098202024774 | T | T | T |
| 0.5773515423100939 | 0.1749327844906008 | 0.3312082339037266 | T | T | T |
| 0.6961511439819744 | 0.1321365157998234 | 0.1938676522148939 | T | T | T |
| 0.7316418862708040 | 0.1721573653662640 | 0.9729659356706678 | T | T | T |
| 0.8864452499411517 | 0.1730194115042340 | 0.9822456118062397 | T | T | T |
| 0.9340276872410963 | 0.1301071262337358 | 0.1973754339191139 | T | T | T |
| 0.8178195594973844 | 0.1733873738190642 | 0.3317675500118529 | T | T | T |
| 0.9225099903912208 | 0.0532246518756845 | 0.8551690283273131 | T | T | T |



**Structure files (CONTCAR) involved in this work:**

|                    |                    |                    |   |   |   |
|--------------------|--------------------|--------------------|---|---|---|
| 0.8002874498520436 | 0.0252067040639325 | 0.7107198150870988 | T | T | T |
| 0.7801861564603119 | 0.0656815070820139 | 0.4926902059886058 | T | T | T |
| 0.6199969979817492 | 0.0704577376168711 | 0.4902511154212705 | T | T | T |
| 0.5668941182468440 | 0.0324680655057258 | 0.6994591646273176 | T | T | T |
| 0.6769041131407372 | 0.0543914316123418 | 0.8505418166745586 | T | T | T |
| 0.9218101030283958 | 0.8302445054349787 | 0.8366728408832846 | T | T | T |
| 0.8014944588836164 | 0.8671212110572097 | 0.6941480260283370 | T | T | T |
| 0.7659234119861019 | 0.8284705256083030 | 0.4756543931934736 | T | T | T |
| 0.6114468492037414 | 0.8282546095311081 | 0.4892523217307593 | T | T | T |
| 0.5621166353947736 | 0.8750532839128536 | 0.6986750449004067 | T | T | T |
| 0.6773253554047842 | 0.8318946311340004 | 0.8342223944453050 | T | T | T |
| 0.4245910766448954 | 0.4428463977369017 | 0.6422623852457355 | T | T | T |
| 0.3060395482196149 | 0.4696350392405437 | 0.7862349701012846 | T | T | T |
| 0.2800682071183049 | 0.4455298644944186 | 0.0111894436360636 | T | T | T |
| 0.1219730871856878 | 0.4363622506903932 | 0.0116941462387530 | T | T | T |
| 0.0646028927003855 | 0.4702216799939992 | 0.8011535731105153 | T | T | T |
| 0.1779960744587297 | 0.4355399763417936 | 0.6624857734833737 | T | T | T |
| 0.4139562874586318 | 0.6738840764896701 | 0.6658791879787203 | T | T | T |
| 0.2988995983662043 | 0.6278791189447426 | 0.7985291908410718 | T | T | T |
| 0.2661642830042997 | 0.6693729277204359 | 0.0175032043041159 | T | T | T |
| 0.1105537774983355 | 0.6728943532989775 | 0.0091152596630106 | T | T | T |
| 0.0635278122599024 | 0.6287933377381211 | 0.7948090693354826 | T | T | T |
| 0.1781865597837361 | 0.6721524768443569 | 0.6622399042964338 | T | T | T |
| 0.0707246062841165 | 0.5583210099976028 | 0.1467658860610838 | T | T | T |
| 0.1895754066456984 | 0.5316450407123685 | 0.2886694777206815 | T | T | T |
| 0.2139582910302123 | 0.5561491552766133 | 0.5150364251479443 | T | T | T |
| 0.3726380278214913 | 0.5664036186607090 | 0.5131860547879930 | T | T | T |
| 0.4276797965640136 | 0.5308032806879704 | 0.3038939954381410 | T | T | T |
| 0.3169038008434513 | 0.5647939319121354 | 0.1622227696148232 | T | T | T |
| 0.0841233449993282 | 0.3275138853026833 | 0.1618795411975091 | T | T | T |
| 0.1971291951245062 | 0.3733428694161882 | 0.2979910369993355 | T | T | T |
| 0.2294577377867080 | 0.3311398356905738 | 0.5171330186284300 | T | T | T |
| 0.3843880796834367 | 0.3276821682399054 | 0.5065243242878806 | T | T | T |
| 0.4289717913988503 | 0.3739211141873235 | 0.2943221768932462 | T | T | T |
| 0.3167070182992308 | 0.3305380040414776 | 0.1596519982770386 | T | T | T |
| 0.3581312890338585 | 0.0711571236979432 | 0.7223844037174785 | T | T | T |
| 0.3155596967828539 | 0.0530768419067273 | 0.9073038917398575 | T | T | T |
| 0.2006688591913433 | 0.0509519850799030 | 0.0074039886886083 | T | T | T |
| 0.0907893133609119 | 0.0707321854435935 | 0.9006136372675089 | T | T | T |
| 0.1028875212662162 | 0.0648751696036836 | 0.7035170682795401 | T | T | T |
| 0.2286868250020767 | 0.0546779309887717 | 0.7599526163458153 | T | T | T |
| 0.3577126082723510 | 0.8287083609596371 | 0.7503066964654234 | T | T | T |
| 0.2993719765811088 | 0.8630304544075703 | 0.9188171757808822 | T | T | T |
| 0.1878393777489238 | 0.8508788451179686 | 0.0238060842429626 | T | T | T |
| 0.0880845869690890 | 0.8325874859207517 | 0.8968689731886041 | T | T | T |
| 0.1005359423545164 | 0.8417617054624910 | 0.7007768513327299 | T | T | T |
| 0.2267394687621148 | 0.8510489919251539 | 0.7549941344340017 | T | T | T |
| 0.3132234113939943 | 0.9522026393441444 | 0.7734405089125356 | T | T | T |
| 0.0882817633519116 | 0.9527243904806694 | 0.8101811247826719 | T | T | T |
| 0.4320926345425037 | 0.1277425309049848 | 0.5816987362136961 | T | T | T |
| 0.4107816891813070 | 0.9969062948540249 | 0.5741262666286545 | T | T | T |
| 0.3933065876577553 | 0.8648746444675044 | 0.5665482547594732 | T | T | T |
| 0.1942326533791563 | 0.1389822121764694 | 0.6151366442974584 | T | T | T |

**Structure files (CONTCAR) involved in this work:**

|                    |                    |                    |   |   |   |
|--------------------|--------------------|--------------------|---|---|---|
| 0.1898932404181087 | 0.0064106781751119 | 0.5834660344084988 | T | T | T |
| 0.1927159762990795 | 0.8730043668375651 | 0.5640539812605820 | T | T | T |
| 0.9870781789625523 | 0.0392981104634144 | 0.7848689522339031 | T | T | T |
| 0.9843923162991609 | 0.8710447667208883 | 0.7873164350777434 | T | T | T |
| 0.1382626841414972 | 0.9321523734642270 | 0.2221366913042611 | T | T | T |
| 0.1821807620312329 | 0.9510016914920498 | 0.4060748943553040 | T | T | T |
| 0.2963071209637569 | 0.9477169981886370 | 0.5081383498714171 | T | T | T |
| 0.4064352665536299 | 0.9327895827288843 | 0.4011686613028269 | T | T | T |
| 0.3949108849641587 | 0.9366759189425291 | 0.2041022885495787 | T | T | T |
| 0.2683982917566811 | 0.9463906738111825 | 0.2581982018167263 | T | T | T |
| 0.1386177396421885 | 0.1737124971596941 | 0.2508089484238550 | T | T | T |
| 0.1951586866981339 | 0.1374594790117843 | 0.4193014949682748 | T | T | T |
| 0.3090672537360922 | 0.1494689506450567 | 0.5171618139863977 | T | T | T |
| 0.4116615984654652 | 0.1688715592058634 | 0.3951194459525810 | T | T | T |
| 0.3957691905142453 | 0.1603076752464463 | 0.1995305259266373 | T | T | T |
| 0.2701491086196876 | 0.1538152403141778 | 0.2584667559935890 | T | T | T |
| 0.1856608515779540 | 0.0505401243729078 | 0.2699313460701835 | T | T | T |
| 0.4139508373771031 | 0.0494747405528651 | 0.3072133062384546 | T | T | T |
| 0.0640661521877731 | 0.8733247899732953 | 0.0838899416065281 | T | T | T |
| 0.0849944941414432 | 0.0038479468709243 | 0.0712093123533520 | T | T | T |
| 0.1055585186199808 | 0.1356368681763810 | 0.0676162115077741 | T | T | T |
| 0.3049137838446987 | 0.8617585890187159 | 0.1144205935008005 | T | T | T |
| 0.3084039511686568 | 0.9943770311579232 | 0.0823628904162548 | T | T | T |
| 0.3013154843653230 | 0.1280981040833487 | 0.0675693182627627 | T | T | T |
| 0.5115368995541444 | 0.9582714864292849 | 0.2859122594163222 | T | T | T |
| 0.5144183600288804 | 0.1354177349982865 | 0.2805537000481173 | T | T | T |
| 0.6342963852209494 | 0.5673101719894822 | 0.2702245692380467 | T | T | T |
| 0.7050591564794223 | 0.5724744553633936 | 0.1064039809566958 | T | T | T |
| 0.7948171441037962 | 0.5635548470979062 | 0.9594705342902240 | T | T | T |
| 0.8869048615976100 | 0.5713249104059164 | 0.1042893794214778 | T | T | T |
| 0.8870751628823511 | 0.5433831841879622 | 0.2993537579534512 | T | T | T |
| 0.7586274312407415 | 0.5232065716899148 | 0.2706948769939145 | T | T | T |
| 0.6357075918847425 | 0.3335782342543839 | 0.2539448613505120 | T | T | T |
| 0.6945873504821215 | 0.3405946461910626 | 0.0804387204707479 | T | T | T |
| 0.8104545481163146 | 0.3523275228327223 | 0.9841169702359513 | T | T | T |
| 0.9170065992918456 | 0.3254130951413390 | 0.0951941533472657 | T | T | T |
| 0.9042133993186929 | 0.3470365260519915 | 0.2893332931889917 | T | T | T |
| 0.7640205901383903 | 0.3700664489288175 | 0.2458221951254530 | T | T | T |
| 0.6674115108094719 | 0.4519670694556082 | 0.1798033909294465 | T | T | T |
| 0.9175571764961127 | 0.4497585137878277 | 0.1629543741744789 | T | T | T |
| 0.5642919971196187 | 0.6276744517473863 | 0.4123110567937868 | T | T | T |
| 0.5945243973602170 | 0.4993962775624811 | 0.4324999906310791 | T | T | T |
| 0.5914167951087698 | 0.3656081683723210 | 0.4368027340247390 | T | T | T |
| 0.8002726096906289 | 0.6326081183814621 | 0.3719157678898354 | T | T | T |
| 0.8093580084811912 | 0.5148429588941809 | 0.4554179693348644 | T | T | T |
| 0.8311784295094033 | 0.3832416859876522 | 0.4393450831924163 | T | T | T |
| 0.0010577418994367 | 0.5499822408558852 | 0.2081662366988943 | T | T | T |
| 0.0201428326436593 | 0.3702284174785930 | 0.2004241160875262 | T | T | T |
| 0.8556240265884664 | 0.4380910118486661 | 0.7828843310795305 | T | T | T |
| 0.7927857472125853 | 0.4336642650766487 | 0.6116743792754821 | T | T | T |
| 0.7052620136034522 | 0.4295924266312275 | 0.4627039849513668 | T | T | T |
| 0.6098344772022721 | 0.4335890979766509 | 0.6036113760094166 | T | T | T |
| 0.6045108850663865 | 0.4454989268258158 | 0.8018760861085369 | T | T | T |

**Structure files (CONTCAR) involved in this work:**

|                    |                    |                    |   |   |   |
|--------------------|--------------------|--------------------|---|---|---|
| 0.7294392315366008 | 0.4786312043834436 | 0.7706616732386229 | T | T | T |
| 0.8584431155552067 | 0.6788138488788596 | 0.7594940926834309 | T | T | T |
| 0.8060693620611171 | 0.6526974366871293 | 0.5662730097369256 | T | T | T |
| 0.6873260858783476 | 0.6478357163543231 | 0.4773879086164420 | T | T | T |
| 0.5840728634016301 | 0.6702844994075159 | 0.5988180195310344 | T | T | T |
| 0.5913633140488196 | 0.6616697717331821 | 0.7969130005824858 | T | T | T |
| 0.7167500008838579 | 0.6481832136802829 | 0.7419894526190021 | T | T | T |
| 0.8245823940863932 | 0.5523500317036666 | 0.6874763442946774 | T | T | T |
| 0.5821429706004162 | 0.5508643365104412 | 0.6833459698525409 | T | T | T |
| 0.9319002631188450 | 0.3750927871870410 | 0.9125653723000570 | T | T | T |
| 0.9128521673669576 | 0.5068148068121825 | 0.9337482964452519 | T | T | T |
| 0.9038426502707730 | 0.6399161130779047 | 0.9390089166678238 | T | T | T |
| 0.6978229364682007 | 0.3730235084413790 | 0.8870855924809605 | T | T | T |
| 0.6784402747791035 | 0.4989597352523135 | 0.9486590232069724 | T | T | T |
| 0.6825053830832173 | 0.6331521794911339 | 0.9352441776953559 | T | T | T |
| 0.4936836725601420 | 0.4511512219558469 | 0.7035873588791917 | T | T | T |
| 0.4784738613974088 | 0.6321096303832691 | 0.7053288608490650 | T | T | T |
| 0.6419843239364834 | 0.9401971844371537 | 0.2880277002762260 | T | T | T |
| 0.6979679110203111 | 0.9331033786322078 | 0.1102996130438494 | T | T | T |
| 0.7982388964130011 | 0.9484960515687978 | 0.9795393557557717 | T | T | T |
| 0.8968622177528587 | 0.9296766103625748 | 0.1112724425541516 | T | T | T |
| 0.8955756111392537 | 0.9487332853664781 | 0.3084042708838517 | T | T | T |
| 0.7696621916810810 | 0.9710544840056279 | 0.2659286388975124 | T | T | T |
| 0.6394706400831589 | 0.1738273044450315 | 0.2539992139701033 | T | T | T |
| 0.6958734040866575 | 0.1593376194681015 | 0.0798055491181193 | T | T | T |
| 0.8091658831089584 | 0.1475091335342021 | 0.9793576921194134 | T | T | T |
| 0.9133276575333533 | 0.1702473284766872 | 0.0962609631690766 | T | T | T |
| 0.8945527255975855 | 0.1601576679986709 | 0.2932401312129431 | T | T | T |
| 0.7689880241903585 | 0.1428530421966082 | 0.2442662834374887 | T | T | T |
| 0.6765548068804834 | 0.0527230964616092 | 0.1950219455846378 | T | T | T |
| 0.9166845205189972 | 0.0509982661957303 | 0.1825548650104220 | T | T | T |
| 0.5662009280696538 | 0.8770621697921192 | 0.4197091822090134 | T | T | T |
| 0.5811632565595093 | 0.0084659243917871 | 0.4364345873169415 | T | T | T |
| 0.5986016935548270 | 0.1404657380420523 | 0.4367915574754344 | T | T | T |
| 0.8045033719275770 | 0.8719430693551518 | 0.3915787491204341 | T | T | T |
| 0.8155935908695041 | 0.9983248266261718 | 0.4485870397952755 | T | T | T |
| 0.8065506406877048 | 0.1319807861896869 | 0.4357257063683103 | T | T | T |
| 0.0085407047262982 | 0.9555146839506138 | 0.2149711211146424 | T | T | T |
| 0.0140716365133309 | 0.1386594096112521 | 0.2152662644349832 | T | T | T |
| 0.8564024737428384 | 0.0544403324351686 | 0.7858993434281114 | T | T | T |
| 0.7997835589346285 | 0.0709923389800642 | 0.6103148920041391 | T | T | T |
| 0.6996970063600414 | 0.0580340299800310 | 0.4793209839903710 | T | T | T |
| 0.5983740759113282 | 0.0752442975486412 | 0.6069977699447997 | T | T | T |
| 0.6021013040250465 | 0.0532519772372011 | 0.8041220544099931 | T | T | T |
| 0.7276265822891463 | 0.0288500252640410 | 0.7638102425207088 | T | T | T |
| 0.8603561985545779 | 0.8322236837341512 | 0.7582533155527579 | T | T | T |
| 0.8024139808608785 | 0.8334301937042069 | 0.5836649932988603 | T | T | T |
| 0.6888597711655889 | 0.8537888078994341 | 0.4852539529384132 | T | T | T |
| 0.5857633735429671 | 0.8296326807820893 | 0.6041371295080746 | T | T | T |
| 0.6020663619173641 | 0.8519215630298658 | 0.7985351923274850 | T | T | T |
| 0.7293690786615078 | 0.8534368499174403 | 0.7460506077681240 | T | T | T |
| 0.8156813712434750 | 0.9471478316388328 | 0.6837396459892433 | T | T | T |
| 0.5780606668695047 | 0.9532878415219468 | 0.6742446204101519 | T | T | T |

**Structure files (CONTCAR) involved in this work:**

|                    |                    |                     |   |   |   |
|--------------------|--------------------|---------------------|---|---|---|
| 0.9313024805792316 | 0.1256324631867606 | 0.9098768974821383  | T | T | T |
| 0.9184143562320125 | 0.9954619729517709 | 0.9411352249552837  | T | T | T |
| 0.8985776537309782 | 0.8637193823910559 | 0.9419878566854777  | T | T | T |
| 0.6939325638757728 | 0.1304446184155666 | 0.8855185641304154  | T | T | T |
| 0.6805699168092820 | 0.0042169834733837 | 0.9463015393281117  | T | T | T |
| 0.6947209742782053 | 0.8704917379897478 | 0.9377293973134525  | T | T | T |
| 0.4880429302507813 | 0.0482680168791205 | 0.7146643202445391  | T | T | T |
| 0.4824699676533150 | 0.8645780165927867 | 0.7167992041295623  | T | T | T |
| 0.3627261400219210 | 0.4322715015634573 | 0.7195914697621337  | T | T | T |
| 0.3158085935023397 | 0.4492210068072819 | 0.9024863327749189  | T | T | T |
| 0.1999768207948269 | 0.4565904955805044 | -0.0006523139470449 | T | T | T |
| 0.0865089148631421 | 0.4326434853754841 | 0.9030492674264011  | T | T | T |
| 0.1023654624470169 | 0.4360782842318667 | 0.7067616876730165  | T | T | T |
| 0.2312752755865345 | 0.4469846030702061 | 0.7525664708829898  | T | T | T |
| 0.3574479260128659 | 0.6748117347915705 | 0.7529558167183044  | T | T | T |
| 0.2988931888335535 | 0.6361925844645893 | 0.9184056189965655  | T | T | T |
| 0.1876431643894004 | 0.6484104164365484 | 0.0222363226231398  | T | T | T |
| 0.0892385889356525 | 0.6696846490803312 | 0.8923358472599369  | T | T | T |
| 0.1010635707686117 | 0.6578418346256930 | 0.6956616458253465  | T | T | T |
| 0.2264397155771968 | 0.6504138277459263 | 0.7548638952245819  | T | T | T |
| 0.3141746427693407 | 0.5502016290371000 | 0.7688443185020524  | T | T | T |
| 0.0823723592412947 | 0.5496705598832330 | 0.8082493291586494  | T | T | T |
| 0.4322945728940848 | 0.3772690146639694 | 0.5706545290250292  | T | T | T |
| 0.4136215500117899 | 0.5089999187072133 | 0.5733461283572741  | T | T | T |
| 0.3826474799923035 | 0.6390192985131543 | 0.5662653672149712  | T | T | T |
| 0.1903784815179318 | 0.3623626514617796 | 0.6125774958828661  | T | T | T |
| 0.1828337058525101 | 0.4957222137416797 | 0.5812973258971237  | T | T | T |
| 0.1956187742137312 | 0.6288577957583515 | 0.5627850477347092  | T | T | T |
| 0.9846410277118344 | 0.4599244491832006 | 0.7814580458837103  | T | T | T |
| 0.9835867494087313 | 0.6375979803771551 | 0.7797700713863415  | T | T | T |
| 0.1316161742547150 | 0.5696865500188658 | 0.2251784733656410  | T | T | T |
| 0.1805826604352626 | 0.5521915615262755 | 0.4048890330338510  | T | T | T |
| 0.2941873488712812 | 0.5462261958493517 | 0.5094652345221586  | T | T | T |
| 0.4018495101746720 | 0.5720019304649566 | 0.4009464431500617  | T | T | T |
| 0.3925071609480151 | 0.5626811871028869 | 0.2055223524688226  | T | T | T |
| 0.2636758870846073 | 0.5542475233461611 | 0.2529299084752110  | T | T | T |
| 0.1397381233838013 | 0.3261595685906644 | 0.2500372339723530  | T | T | T |
| 0.1970909019621481 | 0.3636188198478087 | 0.4174971135008366  | T | T | T |
| 0.3076923101501370 | 0.3526243730150910 | 0.5222749271573492  | T | T | T |
| 0.4038456083626460 | 0.3292252680218370 | 0.3888591455497650  | T | T | T |
| 0.3934842335004232 | 0.3466976633264668 | 0.1924446952619102  | T | T | T |
| 0.2696452845735354 | 0.3521794729223235 | 0.2537545211207509  | T | T | T |
| 0.1806312111928375 | 0.4512605333079557 | 0.2709186295402895  | T | T | T |
| 0.4078937336546025 | 0.4517686565733066 | 0.3149800152089479  | T | T | T |
| 0.0631974702811650 | 0.6239121351411751 | 0.0752881525212079  | T | T | T |
| 0.0833710704099007 | 0.4922709738465284 | 0.0783761502005943  | T | T | T |
| 0.1156826775398793 | 0.3626231092387224 | 0.0625095695438580  | T | T | T |
| 0.3048109902260713 | 0.6384020932376901 | 0.1133279704524830  | T | T | T |
| 0.3092549667073671 | 0.5054609135944720 | 0.0801455834193881  | T | T | T |
| 0.2962408773961430 | 0.3726592844491438 | 0.0602764392076421  | T | T | T |
| 0.5078159726009488 | 0.5382291203695068 | 0.2923780264728438  | T | T | T |
| 0.5092078033885222 | 0.3671039426662302 | 0.2807012538664739  | T | T | T |
| 0.4350856349108864 | 0.7505161243967704 | 0.6399437011071993  | T | T | T |

**Structure files (CONTCAR) involved in this work:**

|                    |                    |                    |   |   |   |
|--------------------|--------------------|--------------------|---|---|---|
| 0.1881691820221381 | 0.7508482205760554 | 0.6352944617696461 | T | T | T |
| 0.2752737427185870 | 0.7499415372618180 | 0.0171904108376471 | T | T | T |
| 0.1020132099871486 | 0.7493120404504329 | 0.0488609015203164 | T | T | T |
| 0.0630642986700840 | 0.2509856822992301 | 0.1356325823070916 | T | T | T |
| 0.3079793839133905 | 0.2513988828874582 | 0.1341017985252754 | T | T | T |
| 0.2210615913746136 | 0.2505307678334481 | 0.5173949178589204 | T | T | T |
| 0.3932166479156146 | 0.2514914292545490 | 0.5472108967649904 | T | T | T |
| 0.5558952140975529 | 0.2519339463172253 | 0.3543118994180938 | T | T | T |
| 0.8039593007899406 | 0.2510509536126984 | 0.3526749074473573 | T | T | T |
| 0.7274609918539835 | 0.2508554759774271 | 0.9426859869316042 | T | T | T |
| 0.8916850963497280 | 0.2495121408347399 | 0.9399102178530728 | T | T | T |
| 0.9448376061481958 | 0.7536623382469638 | 0.8597947595921257 | T | T | T |
| 0.6815627102815124 | 0.7524123933467524 | 0.8566461637882595 | T | T | T |
| 0.7684688527525706 | 0.7509475108391679 | 0.4386431324943541 | T | T | T |
| 0.6052459352525520 | 0.7518595219306174 | 0.4472213281210712 | T | T | T |
| 0.9362538740909885 | 0.4806578327785176 | 0.5494840344679631 | T | T | T |
| 0.8209774076231956 | 0.3334368710399851 | 0.3254632978779015 | T | T | T |
| 0.7957170688694032 | 0.6383343161686452 | 0.6973254701345565 | T | T | T |
| 0.9339888281948537 | 0.3908160277725851 | 0.4527403910173742 | T | T | T |
| 0.8762038085082245 | 0.5714262552488557 | 0.5601002951833710 | T | T | T |
| 0.9652467788931980 | 0.6070188228046319 | 0.4928669102357835 | T | T | T |
| 0.0300051584495786 | 0.3752583712672699 | 0.4520946937076269 | T | T | T |
| 0.0506057455518678 | 0.3828756813532894 | 0.5272732766779495 | T | T | T |
| 0.0508562777741561 | 0.4140456201613696 | 0.4023049843138541 | T | T | T |
| 0.0443954533805766 | 0.3257008266186675 | 0.4236580909295288 | T | T | T |
| 0.9609354995443958 | 0.4680527661905405 | 0.6100011366283312 | T | T | T |
| 0.9566794001871228 | 0.5386727631262587 | 0.5202538379507106 | T | T | T |
| 0.9781577666389800 | 0.5954498203330859 | 0.4149895313439807 | T | T | T |
| 0.9383401884563860 | 0.6555780440135665 | 0.4893679311539620 | T | T | T |
| 1.0102580719840075 | 0.6170026703012625 | 0.5373070844052409 | T | T | T |

**Figure S15(b) 2Zn-CH<sub>3</sub>+2O<sub>M</sub>-H**

Si O Al Zn C H

1.0000000000000000

20.0219999999999985 0.0000000000000000 0.0000000000000000

0.0000000000000000 19.8990000000000009 0.0000000000000000

0.0000000000000000 0.0000000000000000 13.3829999999999991

94 193 2 2 2 8

Selective dynamics

Direct

|                    |                    |                    |   |   |   |
|--------------------|--------------------|--------------------|---|---|---|
| 0.4210640364222109 | 0.0606200832736915 | 0.6488092265656240 | T | T | T |
| 0.3031589089698952 | 0.0325684118006305 | 0.7916610375789085 | T | T | T |
| 0.2805219331145434 | 0.0567626981463537 | 0.0170914384979637 | T | T | T |
| 0.1204822300955242 | 0.0653165553804472 | 0.0125477481859381 | T | T | T |
| 0.0662204505159662 | 0.0318275270709309 | 0.8005317960057403 | T | T | T |
| 0.1789410948564356 | 0.0662392893412971 | 0.6647614273571013 | T | T | T |
| 0.4171243572713701 | 0.8279973635301709 | 0.6681879345579392 | T | T | T |
| 0.2982753226748213 | 0.8737938239618566 | 0.7987013337087598 | T | T | T |
| 0.2664107664828246 | 0.8307862533535246 | 0.0177258942779801 | T | T | T |
| 0.1104972198128584 | 0.8272502000361002 | 0.0120931657880388 | T | T | T |
| 0.0644505206706330 | 0.8750187069195058 | 0.7983895376830512 | T | T | T |
| 0.1766216871568833 | 0.8293565541390323 | 0.6636549762270008 | T | T | T |
| 0.0741364479509862 | 0.9420206244323824 | 0.1487761754566725 | T | T | T |
| 0.1934761074377261 | 0.9699229243679561 | 0.2901157293594102 | T | T | T |

**Structure files (CONTCAR) involved in this work:**

|                    |                    |                    |   |   |   |
|--------------------|--------------------|--------------------|---|---|---|
| 0.2154557456809537 | 0.9445101325067042 | 0.5163732731959713 | T | T | T |
| 0.3759744802562939 | 0.9364446714328476 | 0.5128072706847798 | T | T | T |
| 0.4312358728200865 | 0.9704934770933513 | 0.2998562620894100 | T | T | T |
| 0.3180404568970861 | 0.9346920049333141 | 0.1638947998882745 | T | T | T |
| 0.0792188283711811 | 0.1737054422141941 | 0.1677322628346926 | T | T | T |
| 0.1976129983158453 | 0.1285796416013554 | 0.2991866181921840 | T | T | T |
| 0.2298824980961437 | 0.1700483176425287 | 0.5171146964593794 | T | T | T |
| 0.3860453823480693 | 0.1746740192453382 | 0.5100439000313470 | T | T | T |
| 0.4337269078927470 | 0.1285879018117449 | 0.2959426982163446 | T | T | T |
| 0.3185995808839374 | 0.1733341685601318 | 0.1648237559939804 | T | T | T |
| 0.5752818828638249 | 0.5582676284319663 | 0.3524320370032360 | T | T | T |
| 0.6914370927379916 | 0.5293703639889235 | 0.2088495256090153 | T | T | T |
| 0.7157238287688913 | 0.5683429098694870 | 0.9879965838849781 | T | T | T |
| 0.8744657029067381 | 0.5724562275261140 | 0.9864277460805405 | T | T | T |
| 0.9238296627249163 | 0.5297213902976743 | 0.1950407829971712 | T | T | T |
| 0.8145506152118879 | 0.5544999896000053 | 0.3502747424338394 | T | T | T |
| 0.5735680999838614 | 0.3298314083920709 | 0.3290338021102246 | T | T | T |
| 0.6902662767994642 | 0.3750997037127564 | 0.1875517675213269 | T | T | T |
| 0.7309696388014321 | 0.3304972549778179 | 0.9722171834100389 | T | T | T |
| 0.8860962966280296 | 0.3256395373592170 | 0.9834875332454162 | T | T | T |
| 0.9384721168413229 | 0.3728728148505439 | 0.1888027785026875 | T | T | T |
| 0.9195917948772052 | 0.4466721747338595 | 0.8570654186083514 | T | T | T |
| 0.8029503176575427 | 0.4775366268127120 | 0.7094767643697186 | T | T | T |
| 0.7839806540869843 | 0.4371378031397244 | 0.4914290962341658 | T | T | T |
| 0.6250877120614776 | 0.4325652081486209 | 0.4838621992839266 | T | T | T |
| 0.5725221368686818 | 0.4714186054415946 | 0.6956603275722884 | T | T | T |
| 0.6806555105358816 | 0.4502271269486774 | 0.8489051649103596 | T | T | T |
| 0.9206116833392793 | 0.6770144057236280 | 0.8341563296699104 | T | T | T |
| 0.7619678581553264 | 0.6742928801581646 | 0.4668115282043011 | T | T | T |
| 0.6081362038063516 | 0.6751400120915884 | 0.4829970265640960 | T | T | T |
| 0.5595120191131142 | 0.6293609553460187 | 0.6953006649479712 | T | T | T |
| 0.6687350103346469 | 0.6714638530430186 | 0.8336286908096279 | T | T | T |
| 0.5751623711670858 | 0.9473553899710044 | 0.3570946461646995 | T | T | T |
| 0.6949843303082567 | 0.9744298170694583 | 0.2127884515394773 | T | T | T |
| 0.7174923029071922 | 0.9376437825887426 | 0.9926922236829602 | T | T | T |
| 0.8769080381822304 | 0.9336500094338210 | 0.9926244308606206 | T | T | T |
| 0.9286956115435295 | 0.9708416965255723 | 0.2022538592486288 | T | T | T |
| 0.8187611971011680 | 0.9484361661285670 | 0.3520831742010038 | T | T | T |
| 0.5768774763862722 | 0.1748317420720614 | 0.3325995638434064 | T | T | T |
| 0.6948296918623593 | 0.1306849900083167 | 0.1934651348853430 | T | T | T |
| 0.7301486493967427 | 0.1731286427673028 | 0.9737439289652469 | T | T | T |
| 0.8853732224662595 | 0.1731131460505214 | 0.9823288214396255 | T | T | T |
| 0.9335116611783543 | 0.1290342950995441 | 0.1962574938120452 | T | T | T |
| 0.8165207968489845 | 0.1706438495272331 | 0.3299677412822364 | T | T | T |
| 0.9214969734429546 | 0.0528880259461308 | 0.8550264531292993 | T | T | T |
| 0.7990951881506958 | 0.0244875962510168 | 0.7107786902351262 | T | T | T |
| 0.7794102000726724 | 0.0655656715799797 | 0.4928362265466953 | T | T | T |
| 0.6192094553731490 | 0.0708243338189092 | 0.4911961320885568 | T | T | T |
| 0.5663113718814360 | 0.0322262255055165 | 0.7006445924015131 | T | T | T |
| 0.6760235161143699 | 0.0540757718328035 | 0.8516278802141642 | T | T | T |
| 0.9209849684327673 | 0.8299170960592414 | 0.8338461739391050 | T | T | T |
| 0.8007224195522318 | 0.8661047665180418 | 0.6910125399529872 | T | T | T |
| 0.7635614260713689 | 0.8284501793577105 | 0.4721043229273015 | T | T | T |

**Structure files (CONTCAR) involved in this work:**

|                    |                    |                    |   |   |   |
|--------------------|--------------------|--------------------|---|---|---|
| 0.6095037742321960 | 0.8287130939761190 | 0.4883230730939666 | T | T | T |
| 0.5615825369836597 | 0.8745673948789064 | 0.6991702649058845 | T | T | T |
| 0.6775256777180263 | 0.8302325956911419 | 0.8329802854734547 | T | T | T |
| 0.4250350122874700 | 0.4431576846917396 | 0.6427518715884939 | T | T | T |
| 0.3059995422788192 | 0.4698643529940809 | 0.7859962163537697 | T | T | T |
| 0.2803018942964516 | 0.4456074544648851 | 0.0115537432017782 | T | T | T |
| 0.1220134963218653 | 0.4362464459964273 | 0.0133643089438893 | T | T | T |
| 0.0657998815368062 | 0.4706970813518257 | 0.8036694736282272 | T | T | T |
| 0.1778369882459479 | 0.4358247241099837 | 0.6623335607080907 | T | T | T |
| 0.4137995163940024 | 0.6740461143855555 | 0.6648869526366452 | T | T | T |
| 0.2986443827737741 | 0.6281122420782709 | 0.7979161301483836 | T | T | T |
| 0.2658829219623760 | 0.6694308969183913 | 0.0164957101141008 | T | T | T |
| 0.1102904444580845 | 0.6735905335400948 | 0.0082958649344633 | T | T | T |
| 0.0630390435750053 | 0.6290990844707258 | 0.7949701626285512 | T | T | T |
| 0.1778011205454530 | 0.6720931728013873 | 0.6622202274001754 | T | T | T |
| 0.0711153591880269 | 0.5590986234253511 | 0.1465439335995870 | T | T | T |
| 0.1900276547807623 | 0.5320958262820424 | 0.2883461161366455 | T | T | T |
| 0.2142004520376431 | 0.5562650995153228 | 0.5147538219069556 | T | T | T |
| 0.3729078331387581 | 0.5662406970941509 | 0.5125627406148237 | T | T | T |
| 0.4282072544938738 | 0.5310258114293098 | 0.3028153764007561 | T | T | T |
| 0.3171385267981620 | 0.5651928388405874 | 0.1622140569584603 | T | T | T |
| 0.0832079598007100 | 0.3273540756584082 | 0.1643392892439908 | T | T | T |
| 0.1970347925880508 | 0.3738212792604926 | 0.2982607381778232 | T | T | T |
| 0.2290033061427937 | 0.3313451843949602 | 0.5173759540242442 | T | T | T |
| 0.3840521032064942 | 0.3281250661484418 | 0.5069979698966943 | T | T | T |
| 0.4285785421003493 | 0.3741077769389306 | 0.2941364646359076 | T | T | T |
| 0.3164818596312510 | 0.3302957553058836 | 0.1594531976237725 | T | T | T |
| 0.3575981061208660 | 0.0711675515508642 | 0.7227011794603929 | T | T | T |
| 0.3150370139495146 | 0.0524734152066800 | 0.9075759808193887 | T | T | T |
| 0.2000661222488928 | 0.0516856456857961 | 0.0073259229059388 | T | T | T |
| 0.0897627218383450 | 0.0705986628054126 | 0.9011246572747980 | T | T | T |
| 0.1022781450691811 | 0.0654284046422876 | 0.7039368435507163 | T | T | T |
| 0.2281615012314533 | 0.0555064835290717 | 0.7603132682697379 | T | T | T |
| 0.3569018338404405 | 0.8288318914402204 | 0.7493464164622491 | T | T | T |
| 0.2994768594263564 | 0.8632479072792799 | 0.9183507195583709 | T | T | T |
| 0.1878862360184290 | 0.8513887742827004 | 0.0229804991099645 | T | T | T |
| 0.0877283707145544 | 0.8330116599662227 | 0.8963823162375706 | T | T | T |
| 0.0999697405023075 | 0.8419902752943338 | 0.7002812494638678 | T | T | T |
| 0.2259459215213631 | 0.8506646151392410 | 0.7553552669435510 | T | T | T |
| 0.3119198044142502 | 0.9522819139211481 | 0.7725498328454455 | T | T | T |
| 0.0875233942900504 | 0.9530137199143170 | 0.8096208322688099 | T | T | T |
| 0.4315863446932440 | 0.1282303978655512 | 0.5824451598444763 | T | T | T |
| 0.4104671531257076 | 0.9975661370783816 | 0.5738384503960700 | T | T | T |
| 0.3934975835656351 | 0.8655924391353407 | 0.5664621959044013 | T | T | T |
| 0.1933928133150078 | 0.1392548419365432 | 0.6149065987990302 | T | T | T |
| 0.1894449808386549 | 0.0064669784712742 | 0.5842857335797371 | T | T | T |
| 0.1926963273614917 | 0.8730796418066535 | 0.5642260932999270 | T | T | T |
| 0.9862780637596144 | 0.0399275371548648 | 0.7847296320042417 | T | T | T |
| 0.9838316562086462 | 0.8713930949679319 | 0.7864663595413628 | T | T | T |
| 0.1376355152282608 | 0.9321692805308714 | 0.2228163779872056 | T | T | T |
| 0.1818636938743425 | 0.9515477640339189 | 0.4066066001816215 | T | T | T |
| 0.2960206161061672 | 0.9481733693793835 | 0.5085298710904528 | T | T | T |
| 0.4058943956483227 | 0.9334760644582819 | 0.4008288397366440 | T | T | T |

**Structure files (CONTCAR) involved in this work:**

|                    |                    |                    |   |   |   |
|--------------------|--------------------|--------------------|---|---|---|
| 0.3944466542424516 | 0.9370684815201812 | 0.2038110425231038 | T | T | T |
| 0.2678834313267235 | 0.9452762184505039 | 0.2584841767843497 | T | T | T |
| 0.1380805326506929 | 0.1731402244215509 | 0.2511077216081296 | T | T | T |
| 0.1950039990185860 | 0.1373640801899133 | 0.4192210121298903 | T | T | T |
| 0.3085892605103037 | 0.1501375334664948 | 0.5178168480448465 | T | T | T |
| 0.4111536932484045 | 0.1691561671546783 | 0.3955388480572256 | T | T | T |
| 0.3956064710367753 | 0.1613301538194393 | 0.1998524886480889 | T | T | T |
| 0.2698512634101917 | 0.1541262358358284 | 0.2583813915633075 | T | T | T |
| 0.1861851909007080 | 0.0503132893400691 | 0.2695725235818622 | T | T | T |
| 0.4126904947944832 | 0.0500924342307948 | 0.3066310169493068 | T | T | T |
| 0.0641143450129316 | 0.8739098970675167 | 0.0831600986711621 | T | T | T |
| 0.0846228740505418 | 0.0046473217240770 | 0.0727595896288823 | T | T | T |
| 0.1049219378387616 | 0.1363409597392050 | 0.0672090922312727 | T | T | T |
| 0.3049715974942556 | 0.8613919450006007 | 0.1140413207446534 | T | T | T |
| 0.3070240749196264 | 0.9940362746943916 | 0.0827747285720544 | T | T | T |
| 0.3014585418509422 | 0.1277627186680410 | 0.0678074122848871 | T | T | T |
| 0.5109287581757626 | 0.9598261591419781 | 0.2853202406436015 | T | T | T |
| 0.5140008728731968 | 0.1355099442132480 | 0.2813679882601445 | T | T | T |
| 0.6351228306003024 | 0.5693839407335106 | 0.2724976828567139 | T | T | T |
| 0.7060242876063011 | 0.5714941155866999 | 0.1078972280618378 | T | T | T |
| 0.7954010037832346 | 0.5677750458214048 | 0.9606760440399049 | T | T | T |
| 0.8871805535720577 | 0.5716147256104978 | 0.1064798087767129 | T | T | T |
| 0.8887786321290641 | 0.5458894093247325 | 0.3020641400325825 | T | T | T |
| 0.7602692076210507 | 0.5246439522551307 | 0.2730568849924311 | T | T | T |
| 0.6345878548238278 | 0.3330582199503022 | 0.2503583303960921 | T | T | T |
| 0.6900199138397948 | 0.3454827462328108 | 0.0739820846925335 | T | T | T |
| 0.8092923849498894 | 0.3518420352829986 | 0.9863042374841036 | T | T | T |
| 0.9165723798331981 | 0.3264152464210227 | 0.0954960493244479 | T | T | T |
| 0.9016576951775128 | 0.3446863879340948 | 0.2888467400811018 | T | T | T |
| 0.7628257909443996 | 0.3685490387868394 | 0.2374944686706633 | T | T | T |
| 0.6662815685276752 | 0.4537004635494215 | 0.1843473223951976 | T | T | T |
| 0.9170695837834488 | 0.4503448815956985 | 0.1682410987612800 | T | T | T |
| 0.5608349506879797 | 0.6275407915745967 | 0.4134437116465164 | T | T | T |
| 0.5946624506621359 | 0.4995457968187262 | 0.4321224511845688 | T | T | T |
| 0.5924839772422534 | 0.3658032613388938 | 0.4347494698542680 | T | T | T |
| 0.8006562297347294 | 0.6318858796614533 | 0.3791085938648913 | T | T | T |
| 0.8133675323142514 | 0.5098918526690663 | 0.4540364488128118 | T | T | T |
| 0.8278158072471853 | 0.3776918321400591 | 0.4365032015382286 | T | T | T |
| 0.0019953418209979 | 0.5499644717845119 | 0.2084186446113064 | T | T | T |
| 0.0188662169999780 | 0.3691997645185245 | 0.2050397799193348 | T | T | T |
| 0.8569615546170384 | 0.4408695477010178 | 0.7816874553216695 | T | T | T |
| 0.7968641135886861 | 0.4308557071478724 | 0.6102134842966528 | T | T | T |
| 0.7056974265694095 | 0.4293677938551222 | 0.4641386069349862 | T | T | T |
| 0.6091612586300561 | 0.4331167064267126 | 0.6026592475499768 | T | T | T |
| 0.6064644812579187 | 0.4481903371380829 | 0.8003476787657172 | T | T | T |
| 0.7314289198476793 | 0.4807942902571179 | 0.7648539978616524 | T | T | T |
| 0.8568441118668658 | 0.6759770015466332 | 0.7638586410145520 | T | T | T |
| 0.7964909974390412 | 0.6646381654485489 | 0.5732725001326264 | T | T | T |
| 0.6843960722382267 | 0.6481720657671285 | 0.4707235243905353 | T | T | T |
| 0.5842139493640321 | 0.6718643994173964 | 0.5985852486793887 | T | T | T |
| 0.5910968093933324 | 0.6609204831884726 | 0.7969294770711398 | T | T | T |
| 0.7171667901391399 | 0.6407397019473713 | 0.7500744963332390 | T | T | T |
| 0.8283963254754856 | 0.5530981206737020 | 0.6791500995455607 | T | T | T |



**Structure files (CONTCAR) involved in this work:**

|                    |                    |                    |   |   |   |
|--------------------|--------------------|--------------------|---|---|---|
| 0.5815479516317432 | 0.5515401401270561 | 0.6794804254659637 | T | T | T |
| 0.9303930763279341 | 0.3755373309912917 | 0.9132597188727292 | T | T | T |
| 0.9121461410444668 | 0.5074241271076867 | 0.9365103493763829 | T | T | T |
| 0.9068484797677764 | 0.6407076805143231 | 0.9422155622736526 | T | T | T |
| 0.7009716612905132 | 0.3741184596215221 | 0.8799625095198136 | T | T | T |
| 0.6826871168307327 | 0.4986760034839651 | 0.9465689457213353 | T | T | T |
| 0.6791375798210553 | 0.6333698877392668 | 0.9407924493432722 | T | T | T |
| 0.4941154521367743 | 0.4513564190790547 | 0.7041297425952365 | T | T | T |
| 0.4784394054549418 | 0.6327270936853894 | 0.7044804345620445 | T | T | T |
| 0.6411250311314468 | 0.9404740057721137 | 0.2877308496670656 | T | T | T |
| 0.6972021169610304 | 0.9313630916647588 | 0.1097417721744734 | T | T | T |
| 0.7976234323157965 | 0.9484595355838672 | 0.9797376669933238 | T | T | T |
| 0.8970015617838873 | 0.9282162260013036 | 0.1097691410933178 | T | T | T |
| 0.8939925954197816 | 0.9491563751169091 | 0.3068571949539462 | T | T | T |
| 0.7683392982177873 | 0.9732821641882926 | 0.2642615319598318 | T | T | T |
| 0.6396645745920563 | 0.1723522351669838 | 0.2566420582552466 | T | T | T |
| 0.6949656228291146 | 0.1615313713031528 | 0.0813904649794440 | T | T | T |
| 0.8077859013899285 | 0.1488042512925714 | 0.9801348179002438 | T | T | T |
| 0.9128823618237805 | 0.1703363690903636 | 0.0960751051200474 | T | T | T |
| 0.8936385103617777 | 0.1584869128124475 | 0.2923805415166433 | T | T | T |
| 0.7681661627064518 | 0.1376993201485084 | 0.2441171045466402 | T | T | T |
| 0.6737406141877933 | 0.0517741814446265 | 0.1899319940159752 | T | T | T |
| 0.9165534953244481 | 0.0501381406767035 | 0.1794728524090901 | T | T | T |
| 0.5642379978921361 | 0.8780715426126111 | 0.4193846446816702 | T | T | T |
| 0.5806162604894253 | 0.0092146628415925 | 0.4362009647796452 | T | T | T |
| 0.5970828776095152 | 0.1411746065601919 | 0.4391956672568015 | T | T | T |
| 0.8016831044147504 | 0.8729081535790970 | 0.3884139217111881 | T | T | T |
| 0.8145030570440793 | 0.9985413467628943 | 0.4475302434011182 | T | T | T |
| 0.8064031723784498 | 0.1320289501709147 | 0.4363965042664249 | T | T | T |
| 0.0077664689084581 | 0.9548589874597569 | 0.2150369395568625 | T | T | T |
| 0.0134455447427529 | 0.1381159369378201 | 0.2151702511938731 | T | T | T |
| 0.8553791333152347 | 0.0535528287663710 | 0.7859572617851297 | T | T | T |
| 0.7989969906769876 | 0.0704673968714575 | 0.6104433278514242 | T | T | T |
| 0.6989111557103139 | 0.0590482437812141 | 0.4791027599317322 | T | T | T |
| 0.5981235034514147 | 0.0747702771086881 | 0.6081869173285548 | T | T | T |
| 0.6011316426768623 | 0.0532585321287712 | 0.8054836826897995 | T | T | T |
| 0.7265964163521590 | 0.0292118684227888 | 0.7642513394966276 | T | T | T |
| 0.8605115528358149 | 0.8314289336600120 | 0.7538177673230323 | T | T | T |
| 0.8009352635886703 | 0.8339117063253257 | 0.5797153278451425 | T | T | T |
| 0.6867091933393199 | 0.8545949262658613 | 0.4843816915264275 | T | T | T |
| 0.5840362539182874 | 0.8300028448801894 | 0.6033668562668681 | T | T | T |
| 0.6020927306457498 | 0.8505042755567405 | 0.7980117017451953 | T | T | T |
| 0.7292163127556468 | 0.8519790907099887 | 0.7445679790374522 | T | T | T |
| 0.8141521764907226 | 0.9465547412789699 | 0.6833892042003800 | T | T | T |
| 0.5774426526600204 | 0.9530412083627603 | 0.6761143885844451 | T | T | T |
| 0.9295349615376065 | 0.1254651601679365 | 0.9096186198807029 | T | T | T |
| 0.9180669306386227 | 0.9950100810051410 | 0.9408264016647107 | T | T | T |
| 0.8968495517305016 | 0.8633475089841831 | 0.9388644279820955 | T | T | T |
| 0.6926613177765903 | 0.1301177812107563 | 0.8875617585450313 | T | T | T |
| 0.6798644601589039 | 0.0031920397802409 | 0.9464589824932939 | T | T | T |
| 0.6950249832216595 | 0.8692826539832016 | 0.9363199365390105 | T | T | T |
| 0.4874442841127792 | 0.0483789678251814 | 0.7151848233478960 | T | T | T |
| 0.4818972803685717 | 0.8642709395431663 | 0.7180572532564907 | T | T | T |

**Structure files (CONTCAR) involved in this work:**

|                    |                    |                    |   |   |   |
|--------------------|--------------------|--------------------|---|---|---|
| 0.3630264525833540 | 0.4325993108450790 | 0.7200601028054467 | T | T | T |
| 0.3153086246783997 | 0.4498282730939334 | 0.9024614948026554 | T | T | T |
| 0.2000108242218818 | 0.4557212606631022 | 0.0008026629874533 | T | T | T |
| 0.0873068919207535 | 0.4317035053499421 | 0.9040485066564957 | T | T | T |
| 0.1020007116378626 | 0.4372574906724894 | 0.7071700650258095 | T | T | T |
| 0.2312963686723191 | 0.4466331653287476 | 0.7521181995170118 | T | T | T |
| 0.3570118936427142 | 0.6748188622741685 | 0.7516904754235922 | T | T | T |
| 0.2992297071468774 | 0.6361686672557961 | 0.9178803517673785 | T | T | T |
| 0.1873160118544499 | 0.6485211158199760 | 0.0198280552239923 | T | T | T |
| 0.0881525161197181 | 0.6709431274108901 | 0.8918192537797774 | T | T | T |
| 0.1007898709439607 | 0.6570473765023526 | 0.6954849642994014 | T | T | T |
| 0.2259472763901128 | 0.6506972844521615 | 0.7551874387410771 | T | T | T |
| 0.3133745134354132 | 0.5503411575721368 | 0.7679774055233306 | T | T | T |
| 0.0826853128272418 | 0.5500607970767141 | 0.8109368764764757 | T | T | T |
| 0.4321125270898706 | 0.3774851093311826 | 0.5711319617660069 | T | T | T |
| 0.4137209504687028 | 0.5090586683286402 | 0.5734550183305880 | T | T | T |
| 0.3825421899021041 | 0.6389435872948738 | 0.5653422371393925 | T | T | T |
| 0.1890080599449254 | 0.3624592012100976 | 0.6122909806977762 | T | T | T |
| 0.1824451559891810 | 0.4958046602426072 | 0.5808331066029627 | T | T | T |
| 0.1959531290207271 | 0.6287530642026610 | 0.5630112600409957 | T | T | T |
| 0.9852048740578455 | 0.4601949380450686 | 0.7851902032991276 | T | T | T |
| 0.9829493236075354 | 0.6364264118592640 | 0.7798376623899753 | T | T | T |
| 0.1327183914562611 | 0.5703169120863218 | 0.2238695023203863 | T | T | T |
| 0.1804800383537111 | 0.5521656743124956 | 0.4047322680716887 | T | T | T |
| 0.2943216705473345 | 0.5458550219210422 | 0.5089756786228490 | T | T | T |
| 0.4021207472632904 | 0.5715455231573807 | 0.4003657953086731 | T | T | T |
| 0.3929020257994137 | 0.5636865769946849 | 0.2048926475760453 | T | T | T |
| 0.2644130166781786 | 0.5542376374721324 | 0.2536005570966950 | T | T | T |
| 0.1388382025525110 | 0.3265353192653913 | 0.2523810603146224 | T | T | T |
| 0.1967138947893514 | 0.3645212969911215 | 0.4179469906521660 | T | T | T |
| 0.3071630832524604 | 0.3527571182371589 | 0.5233642799656233 | T | T | T |
| 0.4030430830714020 | 0.3301142246153451 | 0.3892066124049396 | T | T | T |
| 0.3931478573318276 | 0.3460021933214635 | 0.1927224496304978 | T | T | T |
| 0.2690547590656817 | 0.3520174089600901 | 0.2533131105310910 | T | T | T |
| 0.1805408217916604 | 0.4516255096454156 | 0.2706153085662640 | T | T | T |
| 0.4074846408861195 | 0.4521031971669277 | 0.3128676897863825 | T | T | T |
| 0.0633179201194087 | 0.6244368450159312 | 0.0748008493391997 | T | T | T |
| 0.0832902849820747 | 0.4928332549678719 | 0.0781138817009671 | T | T | T |
| 0.1139641644574898 | 0.3629441578945634 | 0.0649855650622454 | T | T | T |
| 0.3038860665296004 | 0.6384695908070095 | 0.1129352810115368 | T | T | T |
| 0.3092599984540531 | 0.5055231328715400 | 0.0805888221705966 | T | T | T |
| 0.2966617414926109 | 0.3726347376666848 | 0.0600263104920570 | T | T | T |
| 0.5083684677363177 | 0.5376859459712960 | 0.2912676042823614 | T | T | T |
| 0.5087032509196013 | 0.3671361164153001 | 0.2806246386853595 | T | T | T |
| 0.4342914345654412 | 0.7507993568395878 | 0.6388383401130896 | T | T | T |
| 0.1873331174731411 | 0.7507753659019476 | 0.6350323709073801 | T | T | T |
| 0.2748572425751607 | 0.7499999597879723 | 0.0161024249110765 | T | T | T |
| 0.1022961404564125 | 0.7498822807961782 | 0.0486203908247706 | T | T | T |
| 0.0621975729305615 | 0.2510029855608080 | 0.1377725358958779 | T | T | T |
| 0.3071439280773090 | 0.2513332238629342 | 0.1334657662304131 | T | T | T |
| 0.2200811063592802 | 0.2507881993235671 | 0.5168184385695400 | T | T | T |
| 0.3929095046803938 | 0.2519152497374575 | 0.5473452030309062 | T | T | T |
| 0.5557612096207086 | 0.2521510920642593 | 0.3537969880761553 | T | T | T |

**Structure files (CONTCAR) involved in this work:**

|                    |                    |                    |   |   |   |
|--------------------|--------------------|--------------------|---|---|---|
| 0.8009789423282642 | 0.2485357844046862 | 0.3464438547846597 | T | T | T |
| 0.7254983784542961 | 0.2517244789981423 | 0.9424523062597244 | T | T | T |
| 0.8914189674984326 | 0.2497731166497624 | 0.9404592782432897 | T | T | T |
| 0.9447822060888010 | 0.7536184196561182 | 0.8573385330368098 | T | T | T |
| 0.6823048141287238 | 0.7507387812379186 | 0.8548507262525966 | T | T | T |
| 0.7644240364936655 | 0.7521551271640358 | 0.4309214044835507 | T | T | T |
| 0.6020341770206707 | 0.7526446276717289 | 0.4458111121219029 | T | T | T |
| 0.9497655658714503 | 0.4855868080995607 | 0.5929686578244667 | T | T | T |
| 0.8158475764148547 | 0.3310021101098793 | 0.3203987399509418 | T | T | T |
| 0.7944868301163952 | 0.6378241458680398 | 0.6960405607233969 | T | T | T |
| 0.9284117133834833 | 0.3769194176556692 | 0.4329507580929973 | T | T | T |
| 0.9032532313715138 | 0.5814446234553806 | 0.5823368788897426 | T | T | T |
| 0.9539615577910773 | 0.6465278467990543 | 0.5047236899891789 | T | T | T |
| 0.0232911512312381 | 0.3811983638101067 | 0.4606857072199790 | T | T | T |
| 0.0362652701776069 | 0.3832258717910477 | 0.5402810312308359 | T | T | T |
| 0.0450558471425230 | 0.4246649525562605 | 0.4213195897699625 | T | T | T |
| 0.0461198621491847 | 0.3359293784719066 | 0.4282893662276879 | T | T | T |
| 0.9631072639010594 | 0.4713932130074495 | 0.6615685753488240 | T | T | T |
| 0.9900881723135376 | 0.4825774160540360 | 0.5522147954762600 | T | T | T |
| 0.9526984475340743 | 0.6332093951593371 | 0.4250455982504739 | T | T | T |
| 0.9312416519567654 | 0.6962968958482605 | 0.5145997319802172 | T | T | T |
| 1.0061237827606375 | 0.6482491044982603 | 0.5301227214046625 | T | T | T |

**Figure S15(b) TS2**

Si O Al Zn C H

1.0000000000000000

20.0219999999999985 0.0000000000000000 0.0000000000000000

0.0000000000000000 19.8990000000000009 0.0000000000000000

0.0000000000000000 0.0000000000000000 13.3829999999999991

94 193 2 2 2 8

Selective dynamics

Direct

|                    |                    |                    |   |   |   |
|--------------------|--------------------|--------------------|---|---|---|
| 0.4222891165236352 | 0.0575210536705035 | 0.6467232112817668 | T | T | T |
| 0.3020650808224375 | 0.0309077972471839 | 0.7874210576143856 | T | T | T |
| 0.2815918916275888 | 0.0540290223918696 | 0.0147592652332407 | T | T | T |
| 0.1216841779322319 | 0.0659060091543608 | 0.0116406967587348 | T | T | T |
| 0.0674222237506883 | 0.0325541216763991 | 0.7995305716148166 | T | T | T |
| 0.1788243800378822 | 0.0679916971012003 | 0.6619121625083777 | T | T | T |
| 0.4174324195445106 | 0.8269770932124820 | 0.6726278540083191 | T | T | T |
| 0.2954605041555143 | 0.8726310871280267 | 0.7943313630181180 | T | T | T |
| 0.2666239943969032 | 0.8285305169303507 | 0.0146443366791677 | T | T | T |
| 0.1087720704428785 | 0.8251143252002808 | 0.0127988240532690 | T | T | T |
| 0.0668570836265836 | 0.8757303627001445 | 0.7979285693931135 | T | T | T |
| 0.1744684290610492 | 0.8267883777829500 | 0.6553069190183929 | T | T | T |
| 0.0745940167316384 | 0.9428930725928086 | 0.1471782245147757 | T | T | T |
| 0.1955067389348475 | 0.9693257401843167 | 0.2865209442819688 | T | T | T |
| 0.2147233160483254 | 0.9450786282518570 | 0.5142182096018114 | T | T | T |
| 0.3750137003202875 | 0.9328738389945571 | 0.5137651637308566 | T | T | T |
| 0.4312347112946175 | 0.9657322076350389 | 0.3024402419944351 | T | T | T |
| 0.3194733171597760 | 0.9318982875194285 | 0.1622207194453027 | T | T | T |
| 0.0808013140797736 | 0.1732553830057964 | 0.1674342079309238 | T | T | T |
| 0.2011827875433611 | 0.1276095034567251 | 0.2937783783025206 | T | T | T |
| 0.2309358780346280 | 0.1698884705473096 | 0.5123810523785244 | T | T | T |
| 0.3880834411215563 | 0.1732062351628481 | 0.5088310695403913 | T | T | T |

**Structure files (CONTCAR) involved in this work:**

|                    |                    |                    |   |   |   |
|--------------------|--------------------|--------------------|---|---|---|
| 0.4337700309371464 | 0.1235584499653427 | 0.2956456032105754 | T | T | T |
| 0.3222772018790784 | 0.1714689553542900 | 0.1578839384790915 | T | T | T |
| 0.5765452386052372 | 0.5547394489942153 | 0.3550416544105510 | T | T | T |
| 0.6887201620182303 | 0.5246922031159974 | 0.2016551891671940 | T | T | T |
| 0.7145002235038147 | 0.5651989247495989 | 0.9857442634745425 | T | T | T |
| 0.8738129383874755 | 0.5711635397766128 | 0.9835615867423430 | T | T | T |
| 0.9242787299321982 | 0.5285978651913964 | 0.1891500635442962 | T | T | T |
| 0.8109431702187985 | 0.5509150534266175 | 0.3377571301915820 | T | T | T |
| 0.5718601957489852 | 0.3270499226641930 | 0.3298140630472007 | T | T | T |
| 0.6906983193739225 | 0.3706762900952413 | 0.1891264064938736 | T | T | T |
| 0.7285517657570301 | 0.3254501230076740 | 0.9760773117590651 | T | T | T |
| 0.8827519258297833 | 0.3236011355062344 | 0.9929620869344374 | T | T | T |
| 0.9382174407170133 | 0.3743220503259705 | 0.1900373741350501 | T | T | T |
| 0.9213688438023210 | 0.4428963744839534 | 0.8615219008624634 | T | T | T |
| 0.8035914568486865 | 0.4719355641711060 | 0.7157306592805627 | T | T | T |
| 0.7776219001926435 | 0.4353730884151794 | 0.4906401613241347 | T | T | T |
| 0.6187513598033482 | 0.4272175172519257 | 0.4876044159363912 | T | T | T |
| 0.5697580137703563 | 0.4689174948296702 | 0.6988366437731897 | T | T | T |
| 0.6782107818825173 | 0.4454661186457760 | 0.8516303677551059 | T | T | T |
| 0.9229080351346337 | 0.6765672278642278 | 0.8312592928338636 | T | T | T |
| 0.7682783120199791 | 0.6687556079794794 | 0.4631900788198735 | T | T | T |
| 0.6133751907934517 | 0.6731410254484352 | 0.4863709567347594 | T | T | T |
| 0.5613013492772765 | 0.6265539463012287 | 0.6955348155248896 | T | T | T |
| 0.6741271305000507 | 0.6714676257322012 | 0.8253183711493970 | T | T | T |
| 0.5767887396032086 | 0.9451771032155919 | 0.3588459697353932 | T | T | T |
| 0.6970862688338609 | 0.9717260866552523 | 0.2139782435456210 | T | T | T |
| 0.7184376636539631 | 0.9343933727615650 | 0.9937633036406013 | T | T | T |
| 0.8779374570667102 | 0.9325144480601588 | 0.9945112426524024 | T | T | T |
| 0.9295037426102009 | 0.9704710291471730 | 0.2037573079584628 | T | T | T |
| 0.8211220414125393 | 0.9465300440464087 | 0.3551644543317923 | T | T | T |
| 0.5759008003205929 | 0.1716919762619967 | 0.3313806104885627 | T | T | T |
| 0.6970809218137153 | 0.1290889664784498 | 0.1958072940897216 | T | T | T |
| 0.7309872320104424 | 0.1695387167314342 | 0.9749359502768217 | T | T | T |
| 0.8855605355079328 | 0.1717295056968587 | 0.9844457924583377 | T | T | T |
| 0.9350309325476271 | 0.1280218476770688 | 0.1972125899896306 | T | T | T |
| 0.8197315457006985 | 0.1710687840715416 | 0.3318269208860749 | T | T | T |
| 0.9223666542825437 | 0.0528489021646103 | 0.8563015400195402 | T | T | T |
| 0.8008178533922163 | 0.0245272037825811 | 0.7116481795285217 | T | T | T |
| 0.7803891201268099 | 0.0659603699976721 | 0.4930035952721357 | T | T | T |
| 0.6201269659417314 | 0.0703893234390571 | 0.4906942163231631 | T | T | T |
| 0.5681713493057906 | 0.0299937233108712 | 0.6990604872331924 | T | T | T |
| 0.6767928618583242 | 0.0504789265168908 | 0.8523622631062758 | T | T | T |
| 0.9238456989534345 | 0.8293864517496015 | 0.8383620879505564 | T | T | T |
| 0.8036132215197678 | 0.8671610404470222 | 0.6957404791490673 | T | T | T |
| 0.7697629851698488 | 0.8260748067961587 | 0.4776998194310630 | T | T | T |
| 0.6147097422313447 | 0.8261722920387402 | 0.4898306545372381 | T | T | T |
| 0.5640855257865991 | 0.8730575055643157 | 0.6977400099024488 | T | T | T |
| 0.6789650352122066 | 0.8302164743435998 | 0.8327655949864274 | T | T | T |
| 0.4232884191587638 | 0.4417728318014394 | 0.6474187096883318 | T | T | T |
| 0.3038641110010000 | 0.4683113945119527 | 0.7876682487416165 | T | T | T |
| 0.2835308184810247 | 0.4473678550361900 | 0.0162935670019977 | T | T | T |
| 0.1266006706840869 | 0.4345585086049442 | 0.0168843421399426 | T | T | T |
| 0.0692532772589842 | 0.4637831513746319 | 0.8071330722746256 | T | T | T |

**Structure files (CONTCAR) involved in this work:**

|                    |                    |                    |   |   |   |
|--------------------|--------------------|--------------------|---|---|---|
| 0.1786270107681049 | 0.4316365420521759 | 0.6633591366550321 | T | T | T |
| 0.4145763265621459 | 0.6719399315811884 | 0.6725115167554144 | T | T | T |
| 0.2960945144319007 | 0.6261226251140269 | 0.7953981738847562 | T | T | T |
| 0.2665011154756298 | 0.6702945915541397 | 0.0151910907636310 | T | T | T |
| 0.1095101337797873 | 0.6733829084907142 | 0.0112463200033268 | T | T | T |
| 0.0668122676684859 | 0.6231988093198716 | 0.7981003546716853 | T | T | T |
| 0.1756235866093532 | 0.6702070202161133 | 0.6538859321990390 | T | T | T |
| 0.0711747339928193 | 0.5555563075093588 | 0.1453566548283519 | T | T | T |
| 0.1923249750730398 | 0.5291892035557195 | 0.2848477018750730 | T | T | T |
| 0.2140373035192601 | 0.5523373470598543 | 0.5126668805004505 | T | T | T |
| 0.3728803914217567 | 0.5658854666389643 | 0.5167765209639491 | T | T | T |
| 0.4295837074233338 | 0.5333512843972008 | 0.3068201408867766 | T | T | T |
| 0.3198999141060381 | 0.5675877053884472 | 0.1630530682861736 | T | T | T |
| 0.0843612513111388 | 0.3272668603115925 | 0.1676908250950215 | T | T | T |
| 0.1996573526109713 | 0.3715934386186611 | 0.2964123975635756 | T | T | T |
| 0.2310292281079752 | 0.3302881911111862 | 0.5147502464286963 | T | T | T |
| 0.3873352816639339 | 0.3267080147862079 | 0.5090220229747455 | T | T | T |
| 0.4298652028708245 | 0.3759847576743067 | 0.2951877960544721 | T | T | T |
| 0.3191943010020613 | 0.3279126203770654 | 0.1567157950712736 | T | T | T |
| 0.3595410771029466 | 0.0677949142555758 | 0.7219334341353363 | T | T | T |
| 0.3148001871220142 | 0.0458451922110857 | 0.9047914993630037 | T | T | T |
| 0.2009291029463904 | 0.0500827755942219 | 0.0067094046555048 | T | T | T |
| 0.0913995614991208 | 0.0712514144453701 | 0.8999408620920670 | T | T | T |
| 0.1024075315148666 | 0.0667337226631131 | 0.7024759755625756 | T | T | T |
| 0.2290950073946508 | 0.0602575908610881 | 0.7570424680111706 | T | T | T |
| 0.3607641074707279 | 0.8305949114247261 | 0.7593806638142818 | T | T | T |
| 0.2884581155742796 | 0.8686650097670222 | 0.9144385519331547 | T | T | T |
| 0.1873824802289694 | 0.8395745422924713 | 0.0344445826731996 | T | T | T |
| 0.0938115166680052 | 0.8347640443565996 | 0.8946949073428392 | T | T | T |
| 0.0999045310910647 | 0.8425837823609696 | 0.6983116423525424 | T | T | T |
| 0.2288652189219499 | 0.8411858898318955 | 0.7432522358798525 | T | T | T |
| 0.3046934312679050 | 0.9508198949453757 | 0.7619322733758334 | T | T | T |
| 0.0896709121287495 | 0.9539028983981622 | 0.8071886325730366 | T | T | T |
| 0.4327762006450163 | 0.1247865322324772 | 0.5795856621201846 | T | T | T |
| 0.4110685482549093 | 0.9942765906624284 | 0.5721714744865670 | T | T | T |
| 0.3902077698959379 | 0.8626054988886159 | 0.5711520524068973 | T | T | T |
| 0.1916790684558569 | 0.1402065908704406 | 0.6086336524919812 | T | T | T |
| 0.1898734230100914 | 0.0063554583523379 | 0.5844824659264973 | T | T | T |
| 0.1894827527810671 | 0.8733267839454499 | 0.5582961437966032 | T | T | T |
| 0.9871540276136664 | 0.0394436317070132 | 0.7861761910965605 | T | T | T |
| 0.9859600772038492 | 0.8715031330701305 | 0.7902828382240819 | T | T | T |
| 0.1381882381959473 | 0.9326135183763146 | 0.2206412782262936 | T | T | T |
| 0.182485782202424  | 0.9548745729503674 | 0.4039105089815100 | T | T | T |
| 0.2954599559563915 | 0.9465317259430480 | 0.5076195550363695 | T | T | T |
| 0.4054193151368872 | 0.9270840762643805 | 0.4020540694842315 | T | T | T |
| 0.3954119491220311 | 0.9337349316644420 | 0.2044410176487304 | T | T | T |
| 0.2683779336705721 | 0.9395462942466903 | 0.2564547531500030 | T | T | T |
| 0.1390525956718881 | 0.1711293275479284 | 0.2515388982101359 | T | T | T |
| 0.2011743129254462 | 0.1328566248420789 | 0.4141924080851169 | T | T | T |
| 0.3099490007132688 | 0.1523966916985345 | 0.5215220603274719 | T | T | T |
| 0.4099594396476612 | 0.1663804129659327 | 0.3926887837817777 | T | T | T |
| 0.3975190551691907 | 0.1540874089705124 | 0.1965386202569042 | T | T | T |
| 0.2709322007022131 | 0.1573272361869913 | 0.2501743479905625 | T | T | T |

**Structure files (CONTCAR) involved in this work:**

|                    |                    |                    |   |   |   |
|--------------------|--------------------|--------------------|---|---|---|
| 0.1926722508268683 | 0.0494245661842184 | 0.2610104111527023 | T | T | T |
| 0.4126192526553646 | 0.0453162957293368 | 0.3109983513564432 | T | T | T |
| 0.0640086458032376 | 0.8757411118246125 | 0.0798223304031767 | T | T | T |
| 0.0843632136237899 | 0.0062618383464058 | 0.0723877656599891 | T | T | T |
| 0.1072205885631339 | 0.1373691934877056 | 0.0658602765489354 | T | T | T |
| 0.3080412976327173 | 0.8597953972464170 | 0.1078138246214827 | T | T | T |
| 0.3082426903821632 | 0.9933563473319152 | 0.0845928625412830 | T | T | T |
| 0.3038467085532514 | 0.1260978434504797 | 0.0610153159656726 | T | T | T |
| 0.5111223037784394 | 0.9552399677613840 | 0.2894203315544738 | T | T | T |
| 0.5143012496872174 | 0.1294994349279558 | 0.2818376794991645 | T | T | T |
| 0.6379336424019938 | 0.5618712977619064 | 0.2774654653706068 | T | T | T |
| 0.6959595929509261 | 0.5715947493050202 | 0.1033219814290490 | T | T | T |
| 0.7945772808922600 | 0.5578369778921179 | 0.9682141350498885 | T | T | T |
| 0.8918182665828406 | 0.5745920892270517 | 0.1017864167205197 | T | T | T |
| 0.8854947169716918 | 0.5427497713107045 | 0.2936468717238386 | T | T | T |
| 0.7610811079608529 | 0.5200781469482126 | 0.2562418002128475 | T | T | T |
| 0.6365468670940529 | 0.3317305840059485 | 0.2586532351737722 | T | T | T |
| 0.6874334790039671 | 0.3358318244894144 | 0.0789572575242783 | T | T | T |
| 0.8057527255312856 | 0.3493124035837410 | 0.9919626564652811 | T | T | T |
| 0.9103360282457226 | 0.3218006864909090 | 0.1071587619831918 | T | T | T |
| 0.9042354727296409 | 0.3557828581187755 | 0.2967101755182200 | T | T | T |
| 0.7639285958776785 | 0.3667437757969590 | 0.2372592931016401 | T | T | T |
| 0.6653369165977160 | 0.4487641445938687 | 0.1764316831341073 | T | T | T |
| 0.9176238715539415 | 0.4502494881357384 | 0.1565490327923675 | T | T | T |
| 0.5685311218437991 | 0.6252394839567726 | 0.4148633482542377 | T | T | T |
| 0.5894251620324602 | 0.4944607253375705 | 0.4349995924305580 | T | T | T |
| 0.5868212097647511 | 0.3600549080002998 | 0.4392351874410250 | T | T | T |
| 0.7970311050290526 | 0.6292488520138779 | 0.3651395116882548 | T | T | T |
| 0.7996804125800263 | 0.5106149554217093 | 0.4463851635551162 | T | T | T |
| 0.8239393379352370 | 0.3795701093626961 | 0.4371396233925101 | T | T | T |
| 0.0022443487663535 | 0.5474691576184658 | 0.2083355001360835 | T | T | T |
| 0.0188083436044457 | 0.3699850243337683 | 0.2004349946300806 | T | T | T |
| 0.8590884907128447 | 0.4345697758466460 | 0.7837423919979978 | T | T | T |
| 0.7977318505439331 | 0.4339998566770923 | 0.6080516756195425 | T | T | T |
| 0.6994241921302231 | 0.4242997181717141 | 0.4701830595174664 | T | T | T |
| 0.6026245872027983 | 0.4277541105811249 | 0.6058803127555001 | T | T | T |
| 0.6046819273072233 | 0.4444387128480217 | 0.8017259877775372 | T | T | T |
| 0.7313921634824453 | 0.4729808040011769 | 0.7685325977895150 | T | T | T |
| 0.8648736014436411 | 0.6786896145279074 | 0.7495035034286321 | T | T | T |
| 0.8135591201742316 | 0.6445878591769152 | 0.5594504846441267 | T | T | T |
| 0.6910159103529309 | 0.6474979636845920 | 0.4839543377664308 | T | T | T |
| 0.5851671312206743 | 0.6697998856193145 | 0.5992313984193480 | T | T | T |
| 0.5961051496555402 | 0.6576031420358042 | 0.7948470522676345 | T | T | T |
| 0.7222577394602598 | 0.6472933270996208 | 0.7356938704320913 | T | T | T |
| 0.8277659585140614 | 0.5487567523683310 | 0.6892645466926449 | T | T | T |
| 0.5825326721727798 | 0.5484340520916555 | 0.6793981145480564 | T | T | T |
| 0.9276288055527953 | 0.3755611019059906 | 0.9285975954928787 | T | T | T |
| 0.9131847466626346 | 0.5090182966141812 | 0.9310931752883211 | T | T | T |
| 0.8969203061342914 | 0.6417431689685901 | 0.9349485338125916 | T | T | T |
| 0.6965969820310718 | 0.3699212791356254 | 0.8863164570016715 | T | T | T |
| 0.6786912061769013 | 0.4969028447078457 | 0.9454493394363326 | T | T | T |
| 0.6882961780599383 | 0.6316634226639853 | 0.9294581710429799 | T | T | T |
| 0.4910223355546934 | 0.4525362743112904 | 0.7113636728495141 | T | T | T |

**Structure files (CONTCAR) involved in this work:**

|                    |                    |                    |   |   |   |
|--------------------|--------------------|--------------------|---|---|---|
| 0.4807516303482616 | 0.6311320959247038 | 0.7075180293813754 | T | T | T |
| 0.6417373028830784 | 0.9390711837364912 | 0.2875209560225275 | T | T | T |
| 0.6988870661715241 | 0.9286624126413564 | 0.1109984251343574 | T | T | T |
| 0.7984422451973971 | 0.9447345709652593 | 0.9788449655289350 | T | T | T |
| 0.8962354428538066 | 0.9281513956793661 | 0.1123449259441159 | T | T | T |
| 0.8961596388503458 | 0.9491936297902670 | 0.3096052873570302 | T | T | T |
| 0.7698392267694251 | 0.9676048894636260 | 0.2666544467977970 | T | T | T |
| 0.6398980848148390 | 0.1688904139013676 | 0.2577470262070915 | T | T | T |
| 0.6967678283474176 | 0.1595322441197749 | 0.0835332408940201 | T | T | T |
| 0.8086460152003505 | 0.1452035200011734 | 0.9807196379122471 | T | T | T |
| 0.9127094388789891 | 0.1694166942650228 | 0.0982285273307742 | T | T | T |
| 0.8965149567309821 | 0.1565890497834556 | 0.2948558783003373 | T | T | T |
| 0.7697997937759222 | 0.1383633963418295 | 0.2474674590908941 | T | T | T |
| 0.6784057309555873 | 0.0495873757669490 | 0.1911129094116452 | T | T | T |
| 0.9171127612178610 | 0.0494281849314238 | 0.1801559423701992 | T | T | T |
| 0.5692108029429060 | 0.8756866178824136 | 0.4219315018455944 | T | T | T |
| 0.5824092288943830 | 0.0076874260980412 | 0.4367169958887039 | T | T | T |
| 0.5955404108363231 | 0.1403788062326471 | 0.4399311387593527 | T | T | T |
| 0.8077129469189229 | 0.8704408767940452 | 0.3939844966013245 | T | T | T |
| 0.8145131202308785 | 0.9979740462275105 | 0.4486412485594554 | T | T | T |
| 0.8089125772576929 | 0.1324742841865292 | 0.4383544861925407 | T | T | T |
| 0.0085929990681776 | 0.9544404691759392 | 0.2147375546214108 | T | T | T |
| 0.0151846223032136 | 0.1364425286673888 | 0.2131414808054278 | T | T | T |
| 0.8566110373413063 | 0.0551208796953503 | 0.7862393129276765 | T | T | T |
| 0.7986431835227322 | 0.0701599365366265 | 0.6111623660960678 | T | T | T |
| 0.6999817894391061 | 0.0607903165397132 | 0.4764970369305551 | T | T | T |
| 0.6005347716886937 | 0.0736482017555279 | 0.6082744248819932 | T | T | T |
| 0.6022550113512317 | 0.0499450662746632 | 0.8049013380635541 | T | T | T |
| 0.7284249481010762 | 0.0264242112836971 | 0.7658404031089278 | T | T | T |
| 0.8615108134629030 | 0.8322110246837590 | 0.7616020155351828 | T | T | T |
| 0.8053592226567335 | 0.8321942286932775 | 0.5861642607933649 | T | T | T |
| 0.6923773555824059 | 0.8507804712830811 | 0.4859278512713247 | T | T | T |
| 0.5886491553505371 | 0.8268656604623491 | 0.6045674346342337 | T | T | T |
| 0.6034194098792084 | 0.8502899908569369 | 0.7984076611144182 | T | T | T |
| 0.7307408825719937 | 0.8554804502047481 | 0.7464114640935349 | T | T | T |
| 0.8184691916995875 | 0.9470122117257002 | 0.6841255777847878 | T | T | T |
| 0.5803772034979940 | 0.9511314579899856 | 0.6725329873061099 | T | T | T |
| 0.9310624462777800 | 0.1251129931219794 | 0.9118737410696492 | T | T | T |
| 0.9174939948296191 | 0.9944447149924165 | 0.9413363978129551 | T | T | T |
| 0.9011524121639013 | 0.8619202830716564 | 0.9445706368113022 | T | T | T |
| 0.6927799613439878 | 0.1261129498314788 | 0.8901253419073848 | T | T | T |
| 0.6799497186482806 | 0.9989761546032536 | 0.9464849455882163 | T | T | T |
| 0.6955233720409989 | 0.8655423479633205 | 0.9391244556956858 | T | T | T |
| 0.4891161376408348 | 0.0453781573393675 | 0.7122663562494481 | T | T | T |
| 0.4843284202985764 | 0.8635214829595762 | 0.7148307029703738 | T | T | T |
| 0.3614437829168067 | 0.4301068219187875 | 0.7239094305944919 | T | T | T |
| 0.3153006170095832 | 0.4533197541182058 | 0.9052401656497067 | T | T | T |
| 0.2034082933925342 | 0.4601844071236154 | 0.0133539312271842 | T | T | T |
| 0.0989772645491314 | 0.4257578130472835 | 0.9043356021385195 | T | T | T |
| 0.1033367818849472 | 0.4322128941848704 | 0.7076933711735980 | T | T | T |
| 0.2306628672747384 | 0.4405128940820299 | 0.7559088725343764 | T | T | T |
| 0.3608907470791682 | 0.6701789713193835 | 0.7637184967477137 | T | T | T |
| 0.2867504243438989 | 0.6291392405751836 | 0.9151221218462382 | T | T | T |

**Structure files (CONTCAR) involved in this work:**

|                    |                    |                    |   |   |   |
|--------------------|--------------------|--------------------|---|---|---|
| 0.1875362166933235 | 0.6590709533051174 | 0.0372334491733795 | T | T | T |
| 0.0971059052153228 | 0.6650446960735988 | 0.8920823299199192 | T | T | T |
| 0.1016583245346571 | 0.6506827467082735 | 0.6959041760869407 | T | T | T |
| 0.2297985002676696 | 0.6559919298221693 | 0.7419276010284248 | T | T | T |
| 0.3079131255776347 | 0.5483429332478048 | 0.7622290768637056 | T | T | T |
| 0.0843540889519850 | 0.5440340726480302 | 0.8141210212893488 | T | T | T |
| 0.4333752221693522 | 0.3763131553875557 | 0.5761669963368474 | T | T | T |
| 0.4113236859194938 | 0.5071538985743727 | 0.5775657988708991 | T | T | T |
| 0.3814573951589197 | 0.6374542612352747 | 0.5737252859219290 | T | T | T |
| 0.1906703002254842 | 0.3592170350456256 | 0.6104690952248658 | T | T | T |
| 0.1865318183453454 | 0.4930076117916555 | 0.5844720244907601 | T | T | T |
| 0.1920669810766164 | 0.6254536400955588 | 0.5554330118899764 | T | T | T |
| 0.9899845654463144 | 0.4494046273858377 | 0.7995057361169362 | T | T | T |
| 0.9867026256698888 | 0.6333861251160121 | 0.7888966455739262 | T | T | T |
| 0.1325155462279665 | 0.5655357288763807 | 0.2231885133598077 | T | T | T |
| 0.1810598362837950 | 0.5433659118481570 | 0.4027237231117634 | T | T | T |
| 0.2946322161419797 | 0.5467297697777928 | 0.5051923794882356 | T | T | T |
| 0.4066266689889046 | 0.5724793469749297 | 0.4073714372083134 | T | T | T |
| 0.3939173553880433 | 0.5686190463707521 | 0.2117036764691292 | T | T | T |
| 0.2643207822609742 | 0.5590445509143102 | 0.2512304461139450 | T | T | T |
| 0.1358737183961908 | 0.3272477949344664 | 0.2614402458683398 | T | T | T |
| 0.2030449809285342 | 0.3692945397576919 | 0.4168617818030383 | T | T | T |
| 0.3097866616485361 | 0.3478555154617817 | 0.5267937651735076 | T | T | T |
| 0.4057479066371421 | 0.3323341610655638 | 0.3912749226385348 | T | T | T |
| 0.3936887536758524 | 0.3480546000364736 | 0.1947952155215493 | T | T | T |
| 0.2677218601928939 | 0.3408046664468393 | 0.2492129737116451 | T | T | T |
| 0.1897718359039277 | 0.4489949459037993 | 0.2600214369156940 | T | T | T |
| 0.4092212325489367 | 0.4541566183836609 | 0.3141362110674256 | T | T | T |
| 0.0637342891885632 | 0.6212079706724059 | 0.0742108861620092 | T | T | T |
| 0.0815306527004424 | 0.4897467101142036 | 0.0754758030078792 | T | T | T |
| 0.1204917658725624 | 0.3619159116769007 | 0.0716012065490410 | T | T | T |
| 0.3088549409495934 | 0.6391405942073947 | 0.1073481702928898 | T | T | T |
| 0.3167008434184370 | 0.5047754082544975 | 0.0860088805108065 | T | T | T |
| 0.2993078286722702 | 0.3728409852511178 | 0.0599332585696788 | T | T | T |
| 0.5094983901636004 | 0.5401309636459023 | 0.2914718973450680 | T | T | T |
| 0.5098626690223497 | 0.3677789855620396 | 0.2790538379825017 | T | T | T |
| 0.4335588082811715 | 0.7490702929171417 | 0.6463622653056362 | T | T | T |
| 0.1783238496760698 | 0.7486289668664692 | 0.6208870130927999 | T | T | T |
| 0.2841683168796758 | 0.7493231831866928 | 0.0026567371645930 | T | T | T |
| 0.0893669307529369 | 0.7489576078205544 | 0.0449050434730956 | T | T | T |
| 0.0636492031947772 | 0.2509032930265186 | 0.1401687720821280 | T | T | T |
| 0.3172389691881040 | 0.2495764882868760 | 0.1237846951570721 | T | T | T |
| 0.2189447759726685 | 0.2502260070666966 | 0.5049756723711556 | T | T | T |
| 0.3999325741594059 | 0.2500534585017087 | 0.5450280745209366 | T | T | T |
| 0.5522965992041171 | 0.2489343470572019 | 0.3474369443867394 | T | T | T |
| 0.8071173831533076 | 0.2495661816003786 | 0.3459126602423912 | T | T | T |
| 0.7257872103821903 | 0.2476014745985854 | 0.9411929930597550 | T | T | T |
| 0.8895790130751698 | 0.2490197891440545 | 0.9451705801502209 | T | T | T |
| 0.9474685195600343 | 0.7525678374161350 | 0.8583953523488311 | T | T | T |
| 0.6849342465840842 | 0.7504026394940183 | 0.8496343621186336 | T | T | T |
| 0.7745270746120234 | 0.7482148670281799 | 0.4420333220228040 | T | T | T |
| 0.6086765504083174 | 0.7500440071491417 | 0.4465544775000611 | T | T | T |
| 0.9380194142926800 | 0.5206414073686479 | 0.4782703556654210 | T | T | T |



**Structure files (CONTCAR) involved in this work:**

|                    |                    |                    |   |   |   |
|--------------------|--------------------|--------------------|---|---|---|
| 0.8192215733441631 | 0.3329800540010127 | 0.3218946494040232 | T | T | T |
| 0.8016328661633680 | 0.6359835585072534 | 0.6924241938498731 | T | T | T |
| 0.9298897481468112 | 0.3869037114930537 | 0.4455497540312792 | T | T | T |
| 0.8708453565880550 | 0.5577326427621920 | 0.5541093031821421 | T | T | T |
| 0.9937615727693281 | 0.5650153862858865 | 0.4623374890284120 | T | T | T |
| 0.0036648649321862 | 0.3433346002247243 | 0.5148043522073910 | T | T | T |
| 0.0092279607536573 | 0.3603347324343327 | 0.5922575935251048 | T | T | T |
| 0.0504189473403131 | 0.3523840854447262 | 0.4739419722191292 | T | T | T |
| 0.9930732674756610 | 0.2890344611859687 | 0.5137993038782581 | T | T | T |
| 0.9906307876547302 | 0.4984142410500288 | 0.6559927193337849 | T | T | T |
| 0.9824117453731533 | 0.4855456558037076 | 0.6047676880703260 | T | T | T |
| 0.0105363588556413 | 0.5611230780462158 | 0.3845193839144175 | T | T | T |
| 0.9801826869414033 | 0.6180427527656240 | 0.4760284344129235 | T | T | T |
| 0.0356512426822028 | 0.5525724323241711 | 0.5126782539717856 | T | T | T |

**Figure S15(b) Zn-CH<sub>3</sub>+O<sub>M</sub>-CH<sub>3</sub>+H<sub>2</sub>**

Si O Al Zn C H

1.0000000000000000

20.0219999999999985 0.0000000000000000 0.0000000000000000

0.0000000000000000 19.8990000000000009 0.0000000000000000

0.0000000000000000 0.0000000000000000 13.3829999999999991

94 193 2 2 2 8

Selective dynamics

Direct

|                    |                    |                    |   |   |   |
|--------------------|--------------------|--------------------|---|---|---|
| 0.4223603188870387 | 0.0582287041406425 | 0.6472142839369737 | T | T | T |
| 0.3028041511444481 | 0.0316034894008291 | 0.7886625568688632 | T | T | T |
| 0.2813667171212555 | 0.0548189033077563 | 0.0155471266287245 | T | T | T |
| 0.1215006230722699 | 0.0657585574594103 | 0.0112488139945335 | T | T | T |
| 0.0671807568288442 | 0.0317853942764541 | 0.7985379519930935 | T | T | T |
| 0.1795631690474724 | 0.0677679035670253 | 0.6626783203754579 | T | T | T |
| 0.4178177766125133 | 0.8270155425745083 | 0.6722032764325280 | T | T | T |
| 0.2963971124191556 | 0.8733541580529475 | 0.7950763567563494 | T | T | T |
| 0.2665190612181439 | 0.8293082607810963 | 0.0149794852366448 | T | T | T |
| 0.1085375474693565 | 0.8256625419875518 | 0.0125873171861897 | T | T | T |
| 0.0659709990522032 | 0.8744532407936043 | 0.7968331518198731 | T | T | T |
| 0.1755134366197643 | 0.8273200873922121 | 0.6562889107486268 | T | T | T |
| 0.0743603168315152 | 0.9431830242961355 | 0.1476552592303657 | T | T | T |
| 0.1948696924157994 | 0.9700072824732182 | 0.2873116894572813 | T | T | T |
| 0.2151262043809749 | 0.9451394579596493 | 0.5144493805700673 | T | T | T |
| 0.3754236212395284 | 0.9332498747004697 | 0.5139199392970731 | T | T | T |
| 0.4313831607874279 | 0.9660993202443320 | 0.3019483859334698 | T | T | T |
| 0.3189262900465681 | 0.9326515275383630 | 0.1630628547789222 | T | T | T |
| 0.0807412790510698 | 0.1738495521028572 | 0.1660573225192666 | T | T | T |
| 0.2005217915577273 | 0.1283632460047110 | 0.2941324406851498 | T | T | T |
| 0.2312230740897130 | 0.1694665152771215 | 0.5124196149810331 | T | T | T |
| 0.3878310040845248 | 0.1727566159844017 | 0.5074001898987825 | T | T | T |
| 0.4343576554398965 | 0.1238250140334093 | 0.2942330670415885 | T | T | T |
| 0.3216687123431619 | 0.1721492812638622 | 0.1592358732644759 | T | T | T |
| 0.5764114483397098 | 0.5550967038697969 | 0.3524425642679683 | T | T | T |
| 0.6899384558648715 | 0.5238387674482529 | 0.1985653401415058 | T | T | T |
| 0.7147994778212156 | 0.5646787315139437 | 0.9840385384992529 | T | T | T |
| 0.8741092172103317 | 0.5679729090827867 | 0.9837002751630916 | T | T | T |
| 0.9256373283357303 | 0.5286880378178369 | 0.1926104667841163 | T | T | T |
| 0.8108861711139012 | 0.5520895532536780 | 0.3343751076837245 | T | T | T |

**Structure files (CONTCAR) involved in this work:**

|                    |                    |                    |   |   |   |
|--------------------|--------------------|--------------------|---|---|---|
| 0.5734921903419358 | 0.3261830162975397 | 0.3241515651482189 | T | T | T |
| 0.6932495055463277 | 0.3697342923068575 | 0.1851845883797959 | T | T | T |
| 0.7325661261795724 | 0.3263492772457083 | 0.9705770170758178 | T | T | T |
| 0.8873416387686388 | 0.3251152855890024 | 0.9853379173631349 | T | T | T |
| 0.9383420255541137 | 0.3729577697919053 | 0.1916721288746490 | T | T | T |
| 0.9212575207237698 | 0.4433554078794186 | 0.8524916053076923 | T | T | T |
| 0.8025017080750428 | 0.4716971846837018 | 0.7116486298767998 | T | T | T |
| 0.7757315340081976 | 0.4363400513089368 | 0.4862930824292769 | T | T | T |
| 0.6167283688715103 | 0.4278900816076684 | 0.4833542104372168 | T | T | T |
| 0.5688910182077158 | 0.4676313714416099 | 0.6955192393029047 | T | T | T |
| 0.6781916710840020 | 0.4462976655862609 | 0.8480979677515181 | T | T | T |
| 0.9219846671895178 | 0.6754694997852343 | 0.8316494362104364 | T | T | T |
| 0.7696229588479047 | 0.6678737326209788 | 0.4621326774426431 | T | T | T |
| 0.6149685570139852 | 0.6730670181407986 | 0.4860386645013000 | T | T | T |
| 0.5621291141278292 | 0.6254748657425272 | 0.6942831418725421 | T | T | T |
| 0.6778795008772369 | 0.6700550366296809 | 0.8202993932141268 | T | T | T |
| 0.5772632307355124 | 0.9453640398013740 | 0.3566012761433786 | T | T | T |
| 0.6975838240851644 | 0.9716202065503754 | 0.2097463433709873 | T | T | T |
| 0.7187319022693858 | 0.9330515278368817 | 0.9910901495464053 | T | T | T |
| 0.8781473540332695 | 0.9330091860836683 | 0.9934769355274903 | T | T | T |
| 0.9292543947673999 | 0.9717391786624777 | 0.2032783360802727 | T | T | T |
| 0.8204558734104639 | 0.9457917134544300 | 0.3531880157595784 | T | T | T |
| 0.5766766493995076 | 0.1707870811962483 | 0.3283854994544397 | T | T | T |
| 0.6986919511941913 | 0.1287571115274837 | 0.1923995132750762 | T | T | T |
| 0.7333271217174780 | 0.1706827265188053 | 0.9728176309168448 | T | T | T |
| 0.8880220192089341 | 0.1727216636459755 | 0.9828992069346006 | T | T | T |
| 0.9354920906984909 | 0.1293569082761462 | 0.1966351900077837 | T | T | T |
| 0.8196150922433014 | 0.1704052633187900 | 0.3310368738431830 | T | T | T |
| 0.9228699949563076 | 0.0534445359007142 | 0.8552025703782020 | T | T | T |
| 0.8017391793785624 | 0.0251883835835368 | 0.7113887196934831 | T | T | T |
| 0.7802601508551593 | 0.0648855721166317 | 0.4919278723415040 | T | T | T |
| 0.6198635073813643 | 0.0704225711697391 | 0.4894733833705434 | T | T | T |
| 0.5683218210392348 | 0.0305802672444252 | 0.6986940654635994 | T | T | T |
| 0.6775094790772794 | 0.0503284318179846 | 0.8514752013935666 | T | T | T |
| 0.9229462331301579 | 0.8283827583323925 | 0.8385997016781698 | T | T | T |
| 0.8044570355859316 | 0.8681412295623335 | 0.6948477931591794 | T | T | T |
| 0.7710506053520796 | 0.8261775832799968 | 0.4769281615613646 | T | T | T |
| 0.6158231989331161 | 0.8263775770078265 | 0.4883873752904158 | T | T | T |
| 0.5643294285693851 | 0.8732668373817559 | 0.6968237003052479 | T | T | T |
| 0.6800610192913230 | 0.8296541500328171 | 0.8288871656077158 | T | T | T |
| 0.4221426110267187 | 0.4410422337725637 | 0.6459264455300364 | T | T | T |
| 0.3039522439122468 | 0.4675776654558101 | 0.7890944435567986 | T | T | T |
| 0.2794421927971497 | 0.4466364292647748 | 0.0146871280773912 | T | T | T |
| 0.1218905883967969 | 0.4349556964076739 | 0.0112468953873818 | T | T | T |
| 0.0657032677733455 | 0.4664571954166910 | 0.7998818555819691 | T | T | T |
| 0.1794001488286180 | 0.4318630620195640 | 0.6641027933215100 | T | T | T |
| 0.4156492785542134 | 0.6717766181778629 | 0.6723377520808307 | T | T | T |
| 0.2967155233410326 | 0.6256912959792134 | 0.7964588611847351 | T | T | T |
| 0.2667357265217482 | 0.6706396103907165 | 0.0165047088995275 | T | T | T |
| 0.1099761495502830 | 0.6735432756280704 | 0.0134333017489822 | T | T | T |
| 0.0675069968962232 | 0.6250227956648176 | 0.7986471505003030 | T | T | T |
| 0.1762159603570565 | 0.6711818742633169 | 0.6554166441970815 | T | T | T |
| 0.0715002152287978 | 0.5561125552863937 | 0.1468947532191311 | T | T | T |

**Structure files (CONTCAR) involved in this work:**

|                    |                    |                    |   |   |   |
|--------------------|--------------------|--------------------|---|---|---|
| 0.1923116415286551 | 0.5297323676125254 | 0.2868872672182510 | T | T | T |
| 0.2139643110378892 | 0.5533041525300234 | 0.5135761643095919 | T | T | T |
| 0.3733273040580058 | 0.5661945635626719 | 0.5149096006326471 | T | T | T |
| 0.4302532059404681 | 0.5333343738239268 | 0.3045488061612866 | T | T | T |
| 0.3176783596107679 | 0.5673699028296231 | 0.1636664110835064 | T | T | T |
| 0.0834241888032052 | 0.3278335171133721 | 0.1644742943778446 | T | T | T |
| 0.1993904042987456 | 0.3717196386790547 | 0.2965297101147319 | T | T | T |
| 0.2307698404072826 | 0.3304922018519205 | 0.5136705409867736 | T | T | T |
| 0.3868587928197139 | 0.3267300643340563 | 0.5053858096042171 | T | T | T |
| 0.4315904496469013 | 0.3755526345106096 | 0.2927590604332419 | T | T | T |
| 0.3181460832890030 | 0.3289227668817095 | 0.1586235435489508 | T | T | T |
| 0.3598381988520086 | 0.0689298976121456 | 0.7228192516550757 | T | T | T |
| 0.3153247509856237 | 0.0468988657694159 | 0.9060164563179949 | T | T | T |
| 0.2008105106782198 | 0.0501196773091448 | 0.0064690809338279 | T | T | T |
| 0.0912080118768755 | 0.0697856449995824 | 0.8994697974393285 | T | T | T |
| 0.1029935144240695 | 0.0662113258672507 | 0.7023721074069309 | T | T | T |
| 0.2294015800636342 | 0.0598680166267988 | 0.7582951786155800 | T | T | T |
| 0.3607519088023633 | 0.8305274906743721 | 0.7583724406081580 | T | T | T |
| 0.2904851091778317 | 0.8686624144285958 | 0.9152184738373484 | T | T | T |
| 0.1871504029005976 | 0.8414090476347148 | 0.0317891751064356 | T | T | T |
| 0.0920075497483581 | 0.8340973942964793 | 0.8947626146812693 | T | T | T |
| 0.1003284570151747 | 0.8410487696740160 | 0.6983262330922246 | T | T | T |
| 0.2287497586085528 | 0.8433363582111276 | 0.7451695417823779 | T | T | T |
| 0.3065015871368947 | 0.9515213126392008 | 0.7634602030960639 | T | T | T |
| 0.0882592176049004 | 0.9527736845443568 | 0.8054739582736079 | T | T | T |
| 0.4326319754302373 | 0.1254766162403244 | 0.5798318037212888 | T | T | T |
| 0.4107173010729919 | 0.9947374032586445 | 0.5731990116454535 | T | T | T |
| 0.3910128836741554 | 0.8627746340734855 | 0.5705683628482677 | T | T | T |
| 0.1929787075406881 | 0.1399415412599294 | 0.6096537936156894 | T | T | T |
| 0.1909564464713536 | 0.0063237677655306 | 0.5851679253324841 | T | T | T |
| 0.1898326900772747 | 0.8735545280106884 | 0.5588894922447571 | T | T | T |
| 0.9870596037554109 | 0.0392859940659052 | 0.7840974946539810 | T | T | T |
| 0.9852381793322423 | 0.8687246153967474 | 0.7876474963017513 | T | T | T |
| 0.1378420891930380 | 0.9327677564237995 | 0.2214258803261243 | T | T | T |
| 0.1821934026216640 | 0.9551903582043726 | 0.4047062548307515 | T | T | T |
| 0.2957882176088430 | 0.9460922740767171 | 0.5070724097469330 | T | T | T |
| 0.4062223595075065 | 0.9281429840176276 | 0.4024598758467023 | T | T | T |
| 0.3949641472348785 | 0.9335361298735577 | 0.2048916666635871 | T | T | T |
| 0.2680508761755863 | 0.9408909857874125 | 0.2574527793425150 | T | T | T |
| 0.1396847863393108 | 0.1724200675366746 | 0.2491884927521899 | T | T | T |
| 0.1989604023871450 | 0.1343086732790873 | 0.4144850545460443 | T | T | T |
| 0.3100072556624662 | 0.1499777934985616 | 0.5174724332391135 | T | T | T |
| 0.4119791442818865 | 0.1664603356660255 | 0.3922449176853665 | T | T | T |
| 0.3973707001891486 | 0.1551345567807606 | 0.1962467246460121 | T | T | T |
| 0.2712955950957088 | 0.1570006239795437 | 0.2524435532271026 | T | T | T |
| 0.1914495205034666 | 0.0501057191056407 | 0.2620021630950380 | T | T | T |
| 0.4127506138292734 | 0.0457013150820156 | 0.3093781046279262 | T | T | T |
| 0.0638860321780973 | 0.8759987296714786 | 0.0802554113841550 | T | T | T |
| 0.0844766308888214 | 0.0064223191479999 | 0.0729374083909056 | T | T | T |
| 0.1068208799590316 | 0.1375047313900076 | 0.0644766961320860 | T | T | T |
| 0.3067844173557998 | 0.8605017967012439 | 0.1092230455874106 | T | T | T |
| 0.3081945835984060 | 0.9942310634504272 | 0.0854563174408550 | T | T | T |
| 0.3026733443853934 | 0.1270575364077541 | 0.0622618477440707 | T | T | T |

**Structure files (CONTCAR) involved in this work:**

|                    |                    |                    |   |   |   |
|--------------------|--------------------|--------------------|---|---|---|
| 0.5111334256183560 | 0.9552776450054205 | 0.2881713417821072 | T | T | T |
| 0.5147851880059521 | 0.1290987937310117 | 0.2786137706811503 | T | T | T |
| 0.6400414987277104 | 0.5583816581481158 | 0.2784033350391754 | T | T | T |
| 0.6938263584830094 | 0.5719103668583569 | 0.1008629452625778 | T | T | T |
| 0.7948603570833763 | 0.5531124062216090 | 0.9721996534820032 | T | T | T |
| 0.8942337440302317 | 0.5723537391616600 | 0.1013480818840362 | T | T | T |
| 0.8878744794288510 | 0.5466045974911067 | 0.2980029854168433 | T | T | T |
| 0.7639092231008822 | 0.5204633024645797 | 0.2498648747842618 | T | T | T |
| 0.6374342260308163 | 0.3304915161735840 | 0.2515686098479836 | T | T | T |
| 0.6923097497927452 | 0.3359245473712479 | 0.0743023091721362 | T | T | T |
| 0.8099832842799671 | 0.3504437352530213 | 0.9835053044520320 | T | T | T |
| 0.9150361717133070 | 0.3257076953458505 | 0.0988805172177639 | T | T | T |
| 0.9041951604698554 | 0.3484237053278605 | 0.2939244365379427 | T | T | T |
| 0.7652889165616740 | 0.3658479344666727 | 0.2364418312612536 | T | T | T |
| 0.6678610722328030 | 0.4478690229314305 | 0.1721339901594117 | T | T | T |
| 0.9170304342847098 | 0.4501344031929458 | 0.1647765428512045 | T | T | T |
| 0.5713965620142045 | 0.6258812541128744 | 0.4119663107220202 | T | T | T |
| 0.5834163219061291 | 0.4940878353801300 | 0.4329817151229753 | T | T | T |
| 0.5886146657045992 | 0.3596702232359615 | 0.4332254918235710 | T | T | T |
| 0.7941413634284751 | 0.6300189221018931 | 0.3602284753378966 | T | T | T |
| 0.8015113598249561 | 0.5112240082722879 | 0.4430264288420067 | T | T | T |
| 0.8206801342274385 | 0.3784193394353944 | 0.4359715570993992 | T | T | T |
| 0.0035457024176796 | 0.5475776887767185 | 0.2119774166038882 | T | T | T |
| 0.0193471376281996 | 0.3705713336474970 | 0.2025529064557630 | T | T | T |
| 0.8564388346010554 | 0.4326534231207214 | 0.7802313464375594 | T | T | T |
| 0.7943459473241928 | 0.4339031188941075 | 0.6043066209208491 | T | T | T |
| 0.6972932823403133 | 0.4303109116616364 | 0.4643501362534158 | T | T | T |
| 0.6006550003824566 | 0.4262063950307167 | 0.6017359044587963 | T | T | T |
| 0.6048243454737513 | 0.4429683007327739 | 0.7976260911919025 | T | T | T |
| 0.7306616489165982 | 0.4759692398284626 | 0.7652565105225388 | T | T | T |
| 0.8664682358725423 | 0.6774678227597565 | 0.7460664291672326 | T | T | T |
| 0.8181250112781562 | 0.6405166929477744 | 0.5531703808948272 | T | T | T |
| 0.6926941034978999 | 0.6475283704888232 | 0.4872631466090512 | T | T | T |
| 0.5847200165336971 | 0.6691600540923738 | 0.5976630949977892 | T | T | T |
| 0.5996258735362292 | 0.6546651877409799 | 0.7925808076446677 | T | T | T |
| 0.7255479287694475 | 0.6452039735819030 | 0.7303833057247687 | T | T | T |
| 0.8314587559780054 | 0.5466719155457580 | 0.6845589812386330 | T | T | T |
| 0.5816759893118494 | 0.5471445312996754 | 0.6757146230367572 | T | T | T |
| 0.9322415597233729 | 0.3748290952422851 | 0.9159349669026680 | T | T | T |
| 0.9132394531306408 | 0.5066090416353122 | 0.9283688419776301 | T | T | T |
| 0.8946495761952581 | 0.6389317415571469 | 0.9331654351376235 | T | T | T |
| 0.6991424864049772 | 0.3713548305499199 | 0.8823959764636705 | T | T | T |
| 0.6767590024697081 | 0.4981798874394737 | 0.9415119054270716 | T | T | T |
| 0.6936143438910380 | 0.6322416913725175 | 0.9257305418557507 | T | T | T |
| 0.4900696995370925 | 0.4518965025442048 | 0.7095523664373707 | T | T | T |
| 0.4818651209364213 | 0.6317074438496809 | 0.7094762693535519 | T | T | T |
| 0.6415474852080928 | 0.9409910693346307 | 0.2838922068857705 | T | T | T |
| 0.6990794573985618 | 0.9267772200846974 | 0.1083165587805137 | T | T | T |
| 0.7986580542952321 | 0.9446139520544903 | 0.9768174163140048 | T | T | T |
| 0.8960250460054994 | 0.9296401181913446 | 0.1115242988605059 | T | T | T |
| 0.8957695823091680 | 0.9503352051200642 | 0.3090219584064361 | T | T | T |
| 0.7698381634646392 | 0.9670489128304993 | 0.2639284956021661 | T | T | T |
| 0.6408770498209091 | 0.1666524747491468 | 0.2555449730047468 | T | T | T |

**Structure files (CONTCAR) involved in this work:**

|                    |                     |                    |   |   |   |
|--------------------|---------------------|--------------------|---|---|---|
| 0.6993418488920928 | 0.1624666710817263  | 0.0820833390500672 | T | T | T |
| 0.8109904154851435 | 0.1465115948171780  | 0.9786795947779595 | T | T | T |
| 0.9141849042439600 | 0.1708168455079318  | 0.0972003402293281 | T | T | T |
| 0.8967834831894940 | 0.1587064866646477  | 0.2934807414088215 | T | T | T |
| 0.7708376658563171 | 0.1364671824491624  | 0.2461286838434828 | T | T | T |
| 0.6804749246751843 | 0.0492590281712142  | 0.1827905760832533 | T | T | T |
| 0.9171616185656170 | 0.0507399701824094  | 0.1798330036067846 | T | T | T |
| 0.5710558038865421 | 0.8751665806981493  | 0.4183341466859969 | T | T | T |
| 0.5827402921312285 | 0.0071133086146746  | 0.4358860260546598 | T | T | T |
| 0.5949292208153398 | 0.1399655308156638  | 0.4377903781156795 | T | T | T |
| 0.8078516931185505 | 0.8690174551226431  | 0.3901509687357015 | T | T | T |
| 0.8120377876928978 | 0.9955204248756360  | 0.4483143940679587 | T | T | T |
| 0.8105615088782484 | 0.1300727473682107  | 0.4364501546133523 | T | T | T |
| 0.0081894809022908 | 0.9549450644316743  | 0.2147293916983319 | T | T | T |
| 0.0157044996895473 | 0.1367706062177244  | 0.2131945685317160 | T | T | T |
| 0.8567695154457992 | 0.0573976870112290  | 0.7858799112379947 | T | T | T |
| 0.7990194626165913 | 0.0695566176782286  | 0.6098196191307125 | T | T | T |
| 0.6997828851486064 | 0.0616949251320855  | 0.4759138041549139 | T | T | T |
| 0.5998593285541653 | 0.0738161065905983  | 0.6068582796623100 | T | T | T |
| 0.6030416774295908 | 0.0513701963288270  | 0.8036894360644371 | T | T | T |
| 0.7290208220568815 | 0.0264384916872635  | 0.7646322526424990 | T | T | T |
| 0.8600766931427328 | 0.8311390546807127  | 0.7627607321093386 | T | T | T |
| 0.8076903557067199 | 0.8347056043890633  | 0.5842741304061922 | T | T | T |
| 0.6936150549363282 | 0.8506713146005372  | 0.4858645852962864 | T | T | T |
| 0.5884076854868082 | 0.8279870866727584  | 0.6023442227246580 | T | T | T |
| 0.6039003442833502 | 0.8492221846151693  | 0.7967105526429125 | T | T | T |
| 0.7304336968044385 | 0.8574341744414099  | 0.7422365605375706 | T | T | T |
| 0.8212321524359476 | 0.9477205068387498  | 0.6863027444905280 | T | T | T |
| 0.5806316867848099 | 0.9515596540671175  | 0.6733495668523615 | T | T | T |
| 0.9334430553452938 | 0.1249878016267410  | 0.9118266903770966 | T | T | T |
| 0.9175776596922568 | 0.9945636438691919  | 0.9394151827087711 | T | T | T |
| 0.9019723899669527 | 0.8622627313223050  | 0.9445987238090052 | T | T | T |
| 0.6945488918916830 | 0.1253873840121193  | 0.8907152883070928 | T | T | T |
| 0.6795189268786246 | -0.0028004511645487 | 0.9437327664912993 | T | T | T |
| 0.6970433709782186 | 0.8637746096063503  | 0.9361509533784351 | T | T | T |
| 0.4892848736489009 | 0.0458934496945614  | 0.7124822312580570 | T | T | T |
| 0.4846306918131553 | 0.8635981140679578  | 0.7146212595797602 | T | T | T |
| 0.3603814395091101 | 0.4293937175559987  | 0.7228734859292529 | T | T | T |
| 0.3159974152345587 | 0.4517117483746497  | 0.9064956065372803 | T | T | T |
| 0.1994869696715452 | 0.4573142422243783  | 0.0008991323421939 | T | T | T |
| 0.0881601329044046 | 0.4286129972218682  | 0.9016787090785380 | T | T | T |
| 0.1028590209885455 | 0.4325907632432466  | 0.7044298134707881 | T | T | T |
| 0.2298717966549329 | 0.4409951730531509  | 0.7584968003045532 | T | T | T |
| 0.3609167795781602 | 0.6697168043880686  | 0.7621886632867642 | T | T | T |
| 0.2881093109057581 | 0.6302766331578210  | 0.9162076900115314 | T | T | T |
| 0.1878927277528497 | 0.6582605199387542  | 0.0384156113625037 | T | T | T |
| 0.0976225903529735 | 0.6645654626112117  | 0.8944002539854348 | T | T | T |
| 0.1012232687426298 | 0.6555955587081755  | 0.6974445384929532 | T | T | T |
| 0.2295357695612756 | 0.6541581123382483  | 0.7434612856614210 | T | T | T |
| 0.3088556366801628 | 0.5477029275201777  | 0.7650005403935983 | T | T | T |
| 0.0856878057576307 | 0.5455644352932835  | 0.8074693325826863 | T | T | T |
| 0.4322819333819579 | 0.3755814540599962  | 0.5747557681266897 | T | T | T |
| 0.4098918387619110 | 0.5062981171397497  | 0.5758015044360476 | T | T | T |

**Structure files (CONTCAR) involved in this work:**

|                    |                    |                    |   |   |   |
|--------------------|--------------------|--------------------|---|---|---|
| 0.3840939578716322 | 0.6372375036353650 | 0.5724756126370161 | T | T | T |
| 0.1928800347126633 | 0.3596053268985771 | 0.6116530129277478 | T | T | T |
| 0.1884033608511545 | 0.4933046792434548 | 0.5856575080228492 | T | T | T |
| 0.1903291155520883 | 0.6256717367320354 | 0.5569841237146114 | T | T | T |
| 0.9858837400092308 | 0.4569922217963320 | 0.7816034272573646 | T | T | T |
| 0.9872329953192783 | 0.6337120644934079 | 0.7907373313228014 | T | T | T |
| 0.1332833273191064 | 0.5659988552837325 | 0.2238265025680420 | T | T | T |
| 0.1795484686654499 | 0.5435221429779834 | 0.4046783561626059 | T | T | T |
| 0.2944300197751893 | 0.5496736174218582 | 0.5039578778608327 | T | T | T |
| 0.4066818725124153 | 0.5723739463299772 | 0.4050765269047040 | T | T | T |
| 0.3927439961224262 | 0.5650856234345074 | 0.2083325400842254 | T | T | T |
| 0.2643241309255012 | 0.5606284750454422 | 0.2553353973216926 | T | T | T |
| 0.1378297389811053 | 0.3275685633705657 | 0.2543168197304741 | T | T | T |
| 0.1981496427213363 | 0.3674130709732449 | 0.4171112580004943 | T | T | T |
| 0.3094616860403588 | 0.3502202973155036 | 0.5183045841224195 | T | T | T |
| 0.4085484621067817 | 0.3311087247964205 | 0.3887447944633970 | T | T | T |
| 0.3933208216495169 | 0.3500461219420991 | 0.1925169766824577 | T | T | T |
| 0.2694283469701291 | 0.3418943899534922 | 0.2544933027337259 | T | T | T |
| 0.1905942950753587 | 0.4496001876562708 | 0.2616157469179124 | T | T | T |
| 0.4129599014725005 | 0.4537073733214745 | 0.3154231314149419 | T | T | T |
| 0.0635426544115146 | 0.6223807038235796 | 0.0770428001301098 | T | T | T |
| 0.0817038073941221 | 0.4911368028815023 | 0.0754601658638571 | T | T | T |
| 0.1160670266203189 | 0.3621903783913334 | 0.0653222182259770 | T | T | T |
| 0.3088319329148574 | 0.6396707832245508 | 0.1091303196893720 | T | T | T |
| 0.3080663157298835 | 0.5056146600965188 | 0.0860002581208949 | T | T | T |
| 0.2947797830297399 | 0.3733039649644285 | 0.0629692045874624 | T | T | T |
| 0.5095874290828696 | 0.5442835341631437 | 0.2864275932796065 | T | T | T |
| 0.5111153441651718 | 0.3663629092192344 | 0.2734248265701889 | T | T | T |
| 0.4339772135914676 | 0.7490795165382070 | 0.6462964062248379 | T | T | T |
| 0.1821813908557381 | 0.7492740069295084 | 0.6222558176970638 | T | T | T |
| 0.2833325262992586 | 0.7498749163530340 | 0.0045904212068521 | T | T | T |
| 0.0906991499927840 | 0.7494139841377916 | 0.0462699822969778 | T | T | T |
| 0.0628577816964723 | 0.2511755739162039 | 0.1382094551962032 | T | T | T |
| 0.3159109906198845 | 0.2504574588390094 | 0.1262357419442602 | T | T | T |
| 0.2207570010154347 | 0.2500533703041886 | 0.5077350630238180 | T | T | T |
| 0.3967358103501288 | 0.2500740586272512 | 0.5433903237859076 | T | T | T |
| 0.5540029289993338 | 0.2483129207514196 | 0.3434099433177903 | T | T | T |
| 0.8034702392594693 | 0.2479911026432691 | 0.3470591622661611 | T | T | T |
| 0.7287389569539608 | 0.2483059983096067 | 0.9360654261499980 | T | T | T |
| 0.8933985831944236 | 0.2493142080404071 | 0.9414269077872075 | T | T | T |
| 0.9452532851993597 | 0.7514317788375547 | 0.8610180392545304 | T | T | T |
| 0.6875765428481044 | 0.7495919072831736 | 0.8416886030432856 | T | T | T |
| 0.7763430053586048 | 0.7476489715327371 | 0.4447799220138031 | T | T | T |
| 0.6105227522564516 | 0.7499306845322806 | 0.4462484555704738 | T | T | T |
| 0.9363573253781463 | 0.4856902975704124 | 0.4961990113181960 | T | T | T |
| 0.8200414550432092 | 0.3307413731132465 | 0.3214493476322451 | T | T | T |
| 0.8049767187152125 | 0.6335022223074260 | 0.6866285923528218 | T | T | T |
| 0.9236468476073592 | 0.3828237541251865 | 0.4733070946535793 | T | T | T |
| 0.8766684777543735 | 0.5514295329162636 | 0.5478781317957502 | T | T | T |
| 0.0050258120754576 | 0.5023548816534668 | 0.4739268222064811 | T | T | T |
| 0.9892743215356660 | 0.3167510523650893 | 0.5170076652689980 | T | T | T |
| 1.0051991016892075 | 0.3267327099815467 | 0.5941502450561524 | T | T | T |
| 0.0331376548630755 | 0.3193854335936116 | 0.4676433407963849 | T | T | T |

**Structure files (CONTCAR) involved in this work:**

|                     |                    |                    |   |   |   |
|---------------------|--------------------|--------------------|---|---|---|
| 0.9679244084066075  | 0.2659948056889486 | 0.5121321991853667 | T | T | T |
| -0.0324401678511664 | 0.6137648847338786 | 0.6081382644341651 | T | T | T |
| -0.0430937583187714 | 0.6332894254322972 | 0.5619171785944898 | T | T | T |
| 0.0238668074202609  | 0.4681601411089722 | 0.4156488284736212 | T | T | T |
| 1.0092559549581386  | 0.5537414072999149 | 0.4444392815447016 | T | T | T |
| 0.0367536150932544  | 0.4968236096664222 | 0.5406544681962130 | T | T | T |

**Figure S15(b) TS3**

Si O Al Zn C H

1.0000000000000000

20.0219999999999985 0.0000000000000000 0.0000000000000000

0.0000000000000000 19.8990000000000009 0.0000000000000000

0.0000000000000000 0.0000000000000000 13.3829999999999991

94 193 2 2 2 6

Selective dynamics

Direct

|                    |                    |                    |   |   |   |
|--------------------|--------------------|--------------------|---|---|---|
| 0.4225355430732007 | 0.0581796653437728 | 0.6469034727249174 | T | T | T |
| 0.3028726188252389 | 0.0315206305370057 | 0.7881135724486681 | T | T | T |
| 0.2816754139062738 | 0.0544142440061262 | 0.0152115858785257 | T | T | T |
| 0.1218173509937294 | 0.0653544848608078 | 0.0111376240062004 | T | T | T |
| 0.0672825657903222 | 0.0319585544545968 | 0.7984060610805076 | T | T | T |
| 0.1795310850453631 | 0.0678273160193240 | 0.6623526826915375 | T | T | T |
| 0.4179713407717876 | 0.8272236729961555 | 0.6726605783362628 | T | T | T |
| 0.2965513729712885 | 0.8733190076269394 | 0.7950362222623791 | T | T | T |
| 0.2667143074233487 | 0.8292971490803794 | 0.0150171459960507 | T | T | T |
| 0.1089623892701213 | 0.8254806078580179 | 0.0124897222501349 | T | T | T |
| 0.0665326657271486 | 0.8745134365901804 | 0.7967421547368621 | T | T | T |
| 0.1757953271733900 | 0.8271786948864901 | 0.6557877367364363 | T | T | T |
| 0.0746103696857746 | 0.9428107045087758 | 0.1474752676748076 | T | T | T |
| 0.1952388203826295 | 0.9699719558283001 | 0.2869265256431861 | T | T | T |
| 0.2151783541878863 | 0.9452456980408114 | 0.5141741802029037 | T | T | T |
| 0.3753991249175715 | 0.9331411246368346 | 0.5141344298274340 | T | T | T |
| 0.4315810284024929 | 0.9656370228120128 | 0.3025762691904947 | T | T | T |
| 0.3194699217915449 | 0.9324839137992976 | 0.1628933467687558 | T | T | T |
| 0.0812843308685123 | 0.1734379291884021 | 0.1657927038751754 | T | T | T |
| 0.2010236703971984 | 0.1283781426627776 | 0.2938183353371928 | T | T | T |
| 0.2315538701753572 | 0.1696464221262740 | 0.5123581119230478 | T | T | T |
| 0.3882769426592046 | 0.1728726111709122 | 0.5071200536828752 | T | T | T |
| 0.4345325362719591 | 0.1232503885357414 | 0.2943276245799605 | T | T | T |
| 0.3222753393045700 | 0.1717218130035434 | 0.1585897046372063 | T | T | T |
| 0.5769818725613137 | 0.5541835874672303 | 0.3540506732940865 | T | T | T |
| 0.6901489538401229 | 0.5246367159012166 | 0.1984617883880762 | T | T | T |
| 0.7131836671460443 | 0.5647882121573242 | 0.9853964734843423 | T | T | T |
| 0.8728772572369602 | 0.5686130808181502 | 0.9843417598655604 | T | T | T |
| 0.9258279382460876 | 0.5296366269662784 | 0.1915629854517514 | T | T | T |
| 0.8107717238397443 | 0.5514459191183247 | 0.3344335303885871 | T | T | T |
| 0.5731842881223629 | 0.3264109136396705 | 0.3262702101312726 | T | T | T |
| 0.6947842971837435 | 0.3698793294582706 | 0.1892549559233431 | T | T | T |
| 0.7307456980168939 | 0.3255783384496705 | 0.9747687147248963 | T | T | T |
| 0.8852435160796150 | 0.3253877748669520 | 0.9902960877390330 | T | T | T |
| 0.9391596751473871 | 0.3754014090897267 | 0.1910209536700752 | T | T | T |
| 0.9198471591269287 | 0.4429038825207511 | 0.8546797566282962 | T | T | T |
| 0.8002130504059937 | 0.4721131139637297 | 0.7157299875032349 | T | T | T |
| 0.7742243957763891 | 0.4355587242458507 | 0.4882267544532520 | T | T | T |

**Structure files (CONTCAR) involved in this work:**

|                    |                    |                    |   |   |   |
|--------------------|--------------------|--------------------|---|---|---|
| 0.6159823248949109 | 0.4266608809023741 | 0.4852953791691384 | T | T | T |
| 0.5690346041739460 | 0.4675460835845374 | 0.6975837492827023 | T | T | T |
| 0.6760052576324157 | 0.4455553409603193 | 0.8529740111742821 | T | T | T |
| 0.9210594934800713 | 0.6759210651957652 | 0.8313821951289959 | T | T | T |
| 0.7699349952045637 | 0.6675015174207453 | 0.4627388737875003 | T | T | T |
| 0.6149579888098273 | 0.6725970020804906 | 0.4861945115052013 | T | T | T |
| 0.5619072363045339 | 0.6254496018666006 | 0.6950751019593785 | T | T | T |
| 0.6757604181486515 | 0.6715108610419527 | 0.8215316980705561 | T | T | T |
| 0.5774954035992775 | 0.9451931435732989 | 0.3576235922321256 | T | T | T |
| 0.6978921404391700 | 0.9715365239959862 | 0.2111452400649013 | T | T | T |
| 0.7190629165250015 | 0.9339997987526624 | 0.9919219151771864 | T | T | T |
| 0.8784240428464117 | 0.9332237452068231 | 0.9938153996463805 | T | T | T |
| 0.9295804519498314 | 0.9706929261682958 | 0.2035309263697285 | T | T | T |
| 0.8209213140726271 | 0.9455616951283740 | 0.3540486666414976 | T | T | T |
| 0.5766905233108029 | 0.1707720844005171 | 0.3285255435698917 | T | T | T |
| 0.6990159457285657 | 0.1290129283092707 | 0.1934903301944956 | T | T | T |
| 0.7331107574960898 | 0.1702366958167902 | 0.9733106180474116 | T | T | T |
| 0.8877554956219628 | 0.1726855655896737 | 0.9842169212727905 | T | T | T |
| 0.9361755577465257 | 0.1280073499296282 | 0.1969470828414384 | T | T | T |
| 0.8211603360980919 | 0.1707447282764796 | 0.3315076546577968 | T | T | T |
| 0.9229277238865625 | 0.0538106815650415 | 0.8558216000176757 | T | T | T |
| 0.8017923825632689 | 0.0251053198098873 | 0.7118462203915257 | T | T | T |
| 0.7804786261121672 | 0.0652053957937521 | 0.4922628128400307 | T | T | T |
| 0.6200809311949647 | 0.0705231462460491 | 0.4898220858170540 | T | T | T |
| 0.5684495651832311 | 0.0307690663648179 | 0.6986027564143850 | T | T | T |
| 0.6775478275245842 | 0.0505754876685632 | 0.8516619374838200 | T | T | T |
| 0.9233875116009994 | 0.8283674160210583 | 0.8391802610849695 | T | T | T |
| 0.8045409419519771 | 0.8678377971136703 | 0.6957353789606818 | T | T | T |
| 0.7714026517592554 | 0.8257101823675175 | 0.4778558928483491 | T | T | T |
| 0.6160052726034057 | 0.8259687354189336 | 0.4891807588319689 | T | T | T |
| 0.5644568875575497 | 0.8737493590730219 | 0.6968065704070675 | T | T | T |
| 0.6795899385914324 | 0.8303457513537246 | 0.8302976221444797 | T | T | T |
| 0.4228983055220865 | 0.4413054623801616 | 0.6447420085581137 | T | T | T |
| 0.3042473868993356 | 0.4676320245794767 | 0.7877314331298397 | T | T | T |
| 0.2804799176832808 | 0.4464197379094398 | 0.0136211520126818 | T | T | T |
| 0.1227496660671553 | 0.4352543398481281 | 0.0112040761912059 | T | T | T |
| 0.0650443373268472 | 0.4659522339508743 | 0.7995236103840004 | T | T | T |
| 0.1796029927570777 | 0.4319240271111391 | 0.6637371573019054 | T | T | T |
| 0.4159389533919925 | 0.6720437197543605 | 0.6714251233046874 | T | T | T |
| 0.2966491321649894 | 0.6257788073067003 | 0.7952239575194675 | T | T | T |
| 0.2670474983911303 | 0.6706672974427508 | 0.0151278245867401 | T | T | T |
| 0.1100063667444003 | 0.6732334827151346 | 0.0116378103398833 | T | T | T |
| 0.0659971108579487 | 0.6249080456828850 | 0.7965311542248200 | T | T | T |
| 0.1760152506005336 | 0.6710188963303402 | 0.6547398758973266 | T | T | T |
| 0.0720464517765818 | 0.5561528891891242 | 0.1470945603330113 | T | T | T |
| 0.1938204564636686 | 0.5294163521863576 | 0.2857761264874858 | T | T | T |
| 0.2157490200565201 | 0.5533473740134814 | 0.5136530233637157 | T | T | T |
| 0.3750552756448629 | 0.5664981269408639 | 0.5140534450824473 | T | T | T |
| 0.4312496553053022 | 0.5334104588789795 | 0.3032182140094817 | T | T | T |
| 0.3190870761570428 | 0.5672689992020561 | 0.1615780210421326 | T | T | T |
| 0.0843486713854582 | 0.3273808389463874 | 0.1632154857169551 | T | T | T |
| 0.2005761381777133 | 0.3713218036683249 | 0.2951041523536602 | T | T | T |
| 0.2316358732970918 | 0.3305391356217457 | 0.5131148077140162 | T | T | T |



**Structure files (CONTCAR) involved in this work:**

|                    |                    |                    |   |   |   |
|--------------------|--------------------|--------------------|---|---|---|
| 0.3877922459832427 | 0.3268274747031961 | 0.5044827149927571 | T | T | T |
| 0.4322636243018673 | 0.3756684186335996 | 0.2914342014303505 | T | T | T |
| 0.3192670461208620 | 0.3285436000729220 | 0.1568019061142017 | T | T | T |
| 0.3598658286950754 | 0.0688768816720742 | 0.7222431744342860 | T | T | T |
| 0.3153916539879288 | 0.0467761654753581 | 0.9054694601345255 | T | T | T |
| 0.2010875628179938 | 0.0494095569034375 | 0.0065760841322065 | T | T | T |
| 0.0916051342169615 | 0.0697239233552758 | 0.8993743196775381 | T | T | T |
| 0.1029821388266557 | 0.0665099045198040 | 0.7022267390129118 | T | T | T |
| 0.2294785413799235 | 0.0598251122284406 | 0.7577961393545050 | T | T | T |
| 0.3612253456581315 | 0.8305219209166105 | 0.7594063077733360 | T | T | T |
| 0.2898915497960142 | 0.8690303754470281 | 0.9151599274204240 | T | T | T |
| 0.1874414441467436 | 0.8410679012606840 | 0.0331636888341766 | T | T | T |
| 0.0933339356938055 | 0.8346526333911135 | 0.8945950979291092 | T | T | T |
| 0.1007284939848082 | 0.8411286794305162 | 0.6981262683657496 | T | T | T |
| 0.2293031820292063 | 0.8430238506871065 | 0.7443596560159494 | T | T | T |
| 0.3065681349991040 | 0.9514342762278741 | 0.7630257291934939 | T | T | T |
| 0.0883444596599392 | 0.9529847279748602 | 0.8048471238819226 | T | T | T |
| 0.4329456634203408 | 0.1253588290187236 | 0.5793921024315827 | T | T | T |
| 0.4110750902013552 | 0.9946082195234555 | 0.5729650174149259 | T | T | T |
| 0.3903540692935737 | 0.8627419147401414 | 0.5713259196712630 | T | T | T |
| 0.1929794217260374 | 0.1399612127941396 | 0.6092250978652607 | T | T | T |
| 0.1906264947697972 | 0.0063899312446922 | 0.5847452055071658 | T | T | T |
| 0.1900393744535574 | 0.8735392789117268 | 0.5584257209902257 | T | T | T |
| 0.9871418034839149 | 0.0397866433570639 | 0.7847006733589413 | T | T | T |
| 0.9858418090940397 | 0.8684781414564077 | 0.7883197718614118 | T | T | T |
| 0.1382166014397747 | 0.9327720009893506 | 0.2210579399994605 | T | T | T |
| 0.1824358763795513 | 0.9552219754854451 | 0.4042778289477877 | T | T | T |
| 0.2958614674469383 | 0.9466260387622797 | 0.5071321740071690 | T | T | T |
| 0.4062023542669264 | 0.9273658689417311 | 0.4027055557387471 | T | T | T |
| 0.3953936055032436 | 0.9333507285343198 | 0.2051043306932392 | T | T | T |
| 0.2683736559361902 | 0.9408537427669654 | 0.2569456385675968 | T | T | T |
| 0.1400472574279834 | 0.1724338420280380 | 0.2491577771064230 | T | T | T |
| 0.1996168961145450 | 0.1344502374617624 | 0.4141640158113608 | T | T | T |
| 0.3103796937862516 | 0.1504778910868475 | 0.5180788934558129 | T | T | T |
| 0.4117729637413493 | 0.1662887859348058 | 0.3916976297056103 | T | T | T |
| 0.3977420605483045 | 0.1539452909192363 | 0.1957660052541618 | T | T | T |
| 0.2716236470002112 | 0.1572038309859328 | 0.2516952081910499 | T | T | T |
| 0.1918364045643465 | 0.0501120950629337 | 0.2617687316032918 | T | T | T |
| 0.4128880204791732 | 0.0452249176979805 | 0.3104395053536550 | T | T | T |
| 0.0640706806187117 | 0.8755929381217742 | 0.0801516209294159 | T | T | T |
| 0.0844255111632825 | 0.0061700235556949 | 0.0727353487915831 | T | T | T |
| 0.1074165555601392 | 0.1371925185018536 | 0.0642946198664072 | T | T | T |
| 0.3074389404118677 | 0.8603313243381771 | 0.1089442282027067 | T | T | T |
| 0.3088994543604291 | 0.9939774371543956 | 0.0850801510605204 | T | T | T |
| 0.3027965356240831 | 0.1267468368136120 | 0.0617588478361785 | T | T | T |
| 0.5113617991455992 | 0.9549630675962766 | 0.2891382844680735 | T | T | T |
| 0.5149866123355745 | 0.1285625838493230 | 0.2791402416626811 | T | T | T |
| 0.6414430080156269 | 0.5571537227034115 | 0.2816484529027151 | T | T | T |
| 0.6905334338563505 | 0.5734903782153487 | 0.1014195100689704 | T | T | T |
| 0.7934859528693941 | 0.5532745216969218 | 0.9758620605671112 | T | T | T |
| 0.8938380698686369 | 0.5742389359412792 | 0.1021345275507035 | T | T | T |
| 0.8882590318423176 | 0.5417967009089077 | 0.2993737616427034 | T | T | T |
| 0.7656214686907694 | 0.5240483200723208 | 0.2445566268965169 | T | T | T |

**Structure files (CONTCAR) involved in this work:**

|                    |                    |                    |   |   |   |
|--------------------|--------------------|--------------------|---|---|---|
| 0.6395766732887159 | 0.3322896984800264 | 0.2589374513189845 | T | T | T |
| 0.6919213833514968 | 0.3335363717011570 | 0.0800969791586292 | T | T | T |
| 0.8080058686622748 | 0.3504921197832170 | 0.9868217698737661 | T | T | T |
| 0.9108635283078691 | 0.3248316069965132 | 0.1059406608049189 | T | T | T |
| 0.9062994589149660 | 0.3593607818175282 | 0.2998833907789403 | T | T | T |
| 0.7676495997742053 | 0.3664021522691208 | 0.2384617813918999 | T | T | T |
| 0.6699717928437944 | 0.4479344578890919 | 0.1729387681998417 | T | T | T |
| 0.9194223836710805 | 0.4516531261056033 | 0.1584880377830721 | T | T | T |
| 0.5711056004259640 | 0.6253171333892271 | 0.4125622799446544 | T | T | T |
| 0.5834912700592408 | 0.4935188901723628 | 0.4351055095675415 | T | T | T |
| 0.5843379497389745 | 0.3592965054806346 | 0.4368169659224524 | T | T | T |
| 0.7971397378942353 | 0.6298156922589803 | 0.3620595092529146 | T | T | T |
| 0.7968454135037671 | 0.5105819341695722 | 0.4410872422792794 | T | T | T |
| 0.8222006578079193 | 0.3798096620151089 | 0.4400801610262160 | T | T | T |
| 0.0037020943534404 | 0.5485243404034722 | 0.2121321007072344 | T | T | T |
| 0.0196968566209330 | 0.3696748004817413 | 0.2006839587418029 | T | T | T |
| 0.8554411859260246 | 0.4319330061944346 | 0.7814360869878094 | T | T | T |
| 0.7883736159639061 | 0.4370486894616765 | 0.6073560577534894 | T | T | T |
| 0.6961098614138118 | 0.4256527550906643 | 0.4632649349804679 | T | T | T |
| 0.6016680026308843 | 0.4263806956406015 | 0.6042679860041437 | T | T | T |
| 0.6031629392233101 | 0.4426505372773508 | 0.8008571211338464 | T | T | T |
| 0.7293323235508246 | 0.4747169060871755 | 0.7720875630582839 | T | T | T |
| 0.8645025893998840 | 0.6795845337756874 | 0.7474636056217399 | T | T | T |
| 0.8161746078629420 | 0.6404711161506796 | 0.5568276453824793 | T | T | T |
| 0.6927181369629584 | 0.6471466803569194 | 0.4852414385481074 | T | T | T |
| 0.5852055384630694 | 0.6684861800564507 | 0.5981389249345299 | T | T | T |
| 0.5975306461974400 | 0.6560446224849246 | 0.7940641666810175 | T | T | T |
| 0.7223498574153817 | 0.6493675966253321 | 0.7290728655252039 | T | T | T |
| 0.8269646070405887 | 0.5483114547860731 | 0.6936408659224801 | T | T | T |
| 0.5821612212640617 | 0.5471116311942784 | 0.6784902050187535 | T | T | T |
| 0.9302879895044793 | 0.3759911785621438 | 0.9227363660492975 | T | T | T |
| 0.9117939666462503 | 0.5072927387428696 | 0.9286608572264585 | T | T | T |
| 0.8934999446247610 | 0.6391142980368840 | 0.9327362293765468 | T | T | T |
| 0.6956244039623515 | 0.3705106012670430 | 0.8883423509757440 | T | T | T |
| 0.6746921812292009 | 0.4977709023271999 | 0.9458933340181868 | T | T | T |
| 0.6930939809635952 | 0.6314853597889860 | 0.9243926751456064 | T | T | T |
| 0.4900991326231237 | 0.4517566699317360 | 0.7099547659201718 | T | T | T |
| 0.4815084029825274 | 0.6312455963349376 | 0.7089455834963188 | T | T | T |
| 0.6417804226326430 | 0.9406035436867689 | 0.2848857015661264 | T | T | T |
| 0.6994584017435364 | 0.9274247582214293 | 0.1090931884085320 | T | T | T |
| 0.7989891610326088 | 0.9452251520974678 | 0.9772559504564331 | T | T | T |
| 0.8961667103765824 | 0.9287994152348578 | 0.1118508019608068 | T | T | T |
| 0.8961721668245104 | 0.9496427008616157 | 0.3094421474381888 | T | T | T |
| 0.7702098079785555 | 0.9665609076582802 | 0.2648656044569729 | T | T | T |
| 0.6409621244678801 | 0.1671660794003211 | 0.2557592593622697 | T | T | T |
| 0.6991641372899194 | 0.1612133249782828 | 0.0823257540479872 | T | T | T |
| 0.8108482382048642 | 0.1462903100401628 | 0.9791237643891394 | T | T | T |
| 0.9140511400872560 | 0.1699804376346004 | 0.0984244740748191 | T | T | T |
| 0.8979957444582901 | 0.1561157039564033 | 0.2949565230569395 | T | T | T |
| 0.7711335090184230 | 0.1384399619297784 | 0.2468252400646304 | T | T | T |
| 0.6811115093286566 | 0.0494251285341503 | 0.1856619870458913 | T | T | T |
| 0.9178047499398588 | 0.0496121226770313 | 0.1792577237352257 | T | T | T |
| 0.5713130931555747 | 0.8751124473037550 | 0.4195494299190017 | T | T | T |

**Structure files (CONTCAR) involved in this work:**

|                    |                    |                    |   |   |   |
|--------------------|--------------------|--------------------|---|---|---|
| 0.5828968997337760 | 0.0071792210691848 | 0.4364934255925669 | T | T | T |
| 0.5953904789932720 | 0.1400657514887852 | 0.4378415614455059 | T | T | T |
| 0.8081579672819912 | 0.8689702924038005 | 0.3915240081072728 | T | T | T |
| 0.8128575435330191 | 0.9961831474897066 | 0.4482673868782360 | T | T | T |
| 0.8098718130945517 | 0.1311031589581038 | 0.4371136219504687 | T | T | T |
| 0.0085711057940126 | 0.9542367996081744 | 0.2149254348479334 | T | T | T |
| 0.0163694513175137 | 0.1361863335396929 | 0.2128573080541772 | T | T | T |
| 0.8568307075535940 | 0.0572452228550042 | 0.7864250161149429 | T | T | T |
| 0.7993106588791026 | 0.0694920747979202 | 0.6102139586139533 | T | T | T |
| 0.6999840783117708 | 0.0613749654378688 | 0.4764188207733370 | T | T | T |
| 0.6000519138427624 | 0.0743851580559802 | 0.6071891174123248 | T | T | T |
| 0.6030368178678187 | 0.0509958149464235 | 0.8039799154007954 | T | T | T |
| 0.7290254936611165 | 0.0264102708354929 | 0.7649760459030288 | T | T | T |
| 0.8606158358912605 | 0.8313859319315515 | 0.7632764210825828 | T | T | T |
| 0.8078843630281278 | 0.8345090352523762 | 0.5851479107867011 | T | T | T |
| 0.6938840550198001 | 0.8498775183005297 | 0.4863939190637001 | T | T | T |
| 0.5887722888565520 | 0.8277192668787061 | 0.6032741139946516 | T | T | T |
| 0.6038446264756365 | 0.8506260210487315 | 0.7972303705670587 | T | T | T |
| 0.7306417778162974 | 0.8562350249286904 | 0.7432538676727601 | T | T | T |
| 0.8209007171217693 | 0.9475399612084558 | 0.6870232623099188 | T | T | T |
| 0.5807596464959309 | 0.9518996332491938 | 0.6721375686815130 | T | T | T |
| 0.9331990162615414 | 0.1256842387797884 | 0.9119813936018049 | T | T | T |
| 0.9179133007604289 | 0.9951167775013058 | 0.9404579607741421 | T | T | T |
| 0.9022665586204499 | 0.8626295444584606 | 0.9447667787203000 | T | T | T |
| 0.6945171869239264 | 0.1258314168542378 | 0.8900309710224641 | T | T | T |
| 0.6799883017699632 | 0.9983705940546301 | 0.9450184424289894 | T | T | T |
| 0.6969691037527499 | 0.8650925833851570 | 0.9367611695507589 | T | T | T |
| 0.4893774922540420 | 0.0460057136019993 | 0.7124755654331179 | T | T | T |
| 0.4847155657800395 | 0.8642839600114106 | 0.7143396547192145 | T | T | T |
| 0.3603973295697244 | 0.4298768408813211 | 0.7204946859316639 | T | T | T |
| 0.3164158598014980 | 0.4513468383737624 | 0.9049765560083379 | T | T | T |
| 0.2004176961006156 | 0.4577727484533219 | 0.0022425571375566 | T | T | T |
| 0.0898083461272923 | 0.4293906533136491 | 0.9013222799516452 | T | T | T |
| 0.1030324486727581 | 0.4326063001702482 | 0.7040841765317539 | T | T | T |
| 0.2300919084413926 | 0.4408387763297341 | 0.7580123193425113 | T | T | T |
| 0.3604882957234399 | 0.6699647190663021 | 0.7601929237185351 | T | T | T |
| 0.2887143401136608 | 0.6303865894846072 | 0.9150109979548695 | T | T | T |
| 0.1881145389803827 | 0.6581607873508221 | 0.0361874006324427 | T | T | T |
| 0.0965552348063036 | 0.6637201088881032 | 0.8930447956578378 | T | T | T |
| 0.1009608220598901 | 0.6552916718066177 | 0.6960731540909568 | T | T | T |
| 0.2291238650952986 | 0.6540010757133862 | 0.7431019941344499 | T | T | T |
| 0.3088823959425321 | 0.5477873045506463 | 0.7638695608240255 | T | T | T |
| 0.0836191433289662 | 0.5453790004127805 | 0.8055009857635158 | T | T | T |
| 0.4332005474488923 | 0.3759310748857718 | 0.5734454616923860 | T | T | T |
| 0.4122516711432484 | 0.5068444202496194 | 0.5745213020479455 | T | T | T |
| 0.3854288345436210 | 0.6378992125309177 | 0.5705987768234080 | T | T | T |
| 0.1931683222680462 | 0.3600288741992599 | 0.6103427448217591 | T | T | T |
| 0.1888458248237872 | 0.4934935559849841 | 0.5852273492775369 | T | T | T |
| 0.1911933372490449 | 0.6255952429191725 | 0.5563454640532082 | T | T | T |
| 0.9853891499632754 | 0.4541412377616282 | 0.7849065617905832 | T | T | T |
| 0.9858906351244855 | 0.6344237141894378 | 0.7890091133535881 | T | T | T |
| 0.1334281356218147 | 0.5654650034409410 | 0.2250816303460964 | T | T | T |
| 0.1826692993469488 | 0.5432635051689269 | 0.4038611760506594 | T | T | T |

**Structure files (CONTCAR) involved in this work:**

|                    |                    |                    |   |   |   |
|--------------------|--------------------|--------------------|---|---|---|
| 0.2961385447174265 | 0.5492877048763358 | 0.5056459935904122 | T | T | T |
| 0.4071538271629460 | 0.5725223633722327 | 0.4034181476694573 | T | T | T |
| 0.3940005894452099 | 0.5654634022564876 | 0.2068677613135758 | T | T | T |
| 0.2653445920505232 | 0.5603139075567791 | 0.2526150784820171 | T | T | T |
| 0.1385454515458666 | 0.3275647593037368 | 0.2532113717566785 | T | T | T |
| 0.2003669403076450 | 0.3670753848311353 | 0.4154810224027032 | T | T | T |
| 0.3103622065130983 | 0.3498145477839579 | 0.5187920303789111 | T | T | T |
| 0.4088341655357687 | 0.3314271609421023 | 0.3875146383852895 | T | T | T |
| 0.3941620877468070 | 0.3502414820215153 | 0.1909817566771327 | T | T | T |
| 0.2702584498381032 | 0.3413582782917775 | 0.2523137868009735 | T | T | T |
| 0.1914894333143196 | 0.4493235258392201 | 0.2606330751539303 | T | T | T |
| 0.4135721690512094 | 0.4538488871750570 | 0.3137458178750578 | T | T | T |
| 0.0643393699677706 | 0.6221218186800875 | 0.0768082437025410 | T | T | T |
| 0.0821017247159205 | 0.4906775744942614 | 0.0765497986983811 | T | T | T |
| 0.1166027043961322 | 0.3620308192241756 | 0.0641495241597782 | T | T | T |
| 0.3093460948727072 | 0.6395441721895351 | 0.1074330794741899 | T | T | T |
| 0.3102226967325332 | 0.5052760630349776 | 0.0841810979920935 | T | T | T |
| 0.2956294375738021 | 0.3728166761002790 | 0.0611447492219699 | T | T | T |
| 0.5107997066729679 | 0.5435987811301152 | 0.2863338577758752 | T | T | T |
| 0.5117911880507462 | 0.3661203707392000 | 0.2719024253371328 | T | T | T |
| 0.4346925473305863 | 0.7494185446173371 | 0.6466639556748510 | T | T | T |
| 0.1821698329304821 | 0.7491266986341090 | 0.6216053635673773 | T | T | T |
| 0.2836105102397468 | 0.7499301361903965 | 0.0037034052386595 | T | T | T |
| 0.0907530704451620 | 0.7490724517338739 | 0.0447932587641349 | T | T | T |
| 0.0632988571996971 | 0.2507749597962757 | 0.1377461255370777 | T | T | T |
| 0.3174346941700385 | 0.2499897102590258 | 0.1250371089434455 | T | T | T |
| 0.2209049512304289 | 0.2501868823308731 | 0.5077059202130235 | T | T | T |
| 0.3980127337830004 | 0.2502117509531392 | 0.5425111719699262 | T | T | T |
| 0.5536131032518337 | 0.2482284934738885 | 0.3427573441422889 | T | T | T |
| 0.8098778564889958 | 0.2493386686902614 | 0.3459474389867386 | T | T | T |
| 0.7281254764883759 | 0.2480310047142809 | 0.9380348820080159 | T | T | T |
| 0.8928768146641165 | 0.2499878278790065 | 0.9456393290386133 | T | T | T |
| 0.9453056703875790 | 0.7514139535591760 | 0.8621344032982990 | T | T | T |
| 0.6853660004240727 | 0.7504871149269828 | 0.8465897000693174 | T | T | T |
| 0.7770643837668004 | 0.7472209882316186 | 0.4456828752282351 | T | T | T |
| 0.6102241317756106 | 0.7495929569343751 | 0.4469109803950390 | T | T | T |
| 0.9400864850300716 | 0.4951944848919209 | 0.5170595546002409 | T | T | T |
| 0.8217945290175335 | 0.3334781093810338 | 0.3266486843169605 | T | T | T |
| 0.8023906211626640 | 0.6349224332847315 | 0.6907871391146526 | T | T | T |
| 0.9371376229801068 | 0.4190939822675722 | 0.4264066213985264 | T | T | T |
| 0.8721055712838913 | 0.5549799925296212 | 0.5534456571962409 | T | T | T |
| 0.0254201502420942 | 0.5263358819182717 | 0.4729049677282362 | T | T | T |
| 0.0373082067012090 | 0.4029865513704232 | 0.4498631788204832 | T | T | T |
| 0.0545796182107051 | 0.4068344913009254 | 0.5274342892135195 | T | T | T |
| 0.0759436663534395 | 0.4196861231512465 | 0.3975496144098479 | T | T | T |
| 0.0248520870434328 | 0.3509051263656642 | 0.4332573962768034 | T | T | T |
| 0.0378752767538731 | 0.5247724710880558 | 0.3926960615571547 | T | T | T |
| 0.0034154265128747 | 0.5725600906204350 | 0.4962091328189514 | T | T | T |
| 0.0679662883707734 | 0.5099059648532973 | 0.5186842862634329 | T | T | T |

**Figure S15(b) C<sub>2</sub>H<sub>6</sub>**

Si O Al Zn C H

1.0000000000000000

20.0219999999999985 0.0000000000000000 0.0000000000000000

**Structure files (CONTCAR) involved in this work:**

0.0000000000000000 19.8990000000000009 0.0000000000000000  
0.0000000000000000 0.0000000000000000 13.3829999999999991  
94 193 2 2 2 6

## Selective dynamics

## Direct

|                    |                    |                    |   |   |   |
|--------------------|--------------------|--------------------|---|---|---|
| 0.4229482152690781 | 0.0599786305784233 | 0.6486819759598966 | T | T | T |
| 0.3047179664755420 | 0.0309972583327772 | 0.7910928380130958 | T | T | T |
| 0.2824776243888498 | 0.0571093001150775 | 0.0168251072696511 | T | T | T |
| 0.1223677908810176 | 0.0645153818083080 | 0.0127446535515275 | T | T | T |
| 0.0672706003081856 | 0.0316784034706491 | 0.8004474190099925 | T | T | T |
| 0.1799265952321179 | 0.0643133017235490 | 0.6638997577050834 | T | T | T |
| 0.4194341538748848 | 0.8278261750824787 | 0.6680670898675916 | T | T | T |
| 0.3014623915879526 | 0.8721386645945297 | 0.8001965406444088 | T | T | T |
| 0.2672365878508642 | 0.8316848883074703 | 0.0194508071592544 | T | T | T |
| 0.1119620728464495 | 0.8271496102779982 | 0.0105044367794200 | T | T | T |
| 0.0654500605823256 | 0.8740373006669213 | 0.7965316308754368 | T | T | T |
| 0.1797316349874462 | 0.8276299187141244 | 0.6645941654908237 | T | T | T |
| 0.0768003539686149 | 0.9410258617606302 | 0.1484728270514912 | T | T | T |
| 0.1949926137176134 | 0.9698390862003614 | 0.2908713492444312 | T | T | T |
| 0.2167011112536841 | 0.9429592574168112 | 0.5161443370573503 | T | T | T |
| 0.3768494374239024 | 0.9363249459359497 | 0.5131528374162087 | T | T | T |
| 0.4335726670253309 | 0.9680899625489916 | 0.3010118160375876 | T | T | T |
| 0.3201005213942409 | 0.9362471537888537 | 0.1646344219706711 | T | T | T |
| 0.0814358145061145 | 0.1734355599391527 | 0.1668866079404885 | T | T | T |
| 0.1986650644005985 | 0.1287091583418013 | 0.3002307679875595 | T | T | T |
| 0.2323725823965376 | 0.1696654755604273 | 0.5185763348533596 | T | T | T |
| 0.3879975425487280 | 0.1736457679528513 | 0.5093478564346994 | T | T | T |
| 0.4361024538475189 | 0.1266333339648588 | 0.2955330748713472 | T | T | T |
| 0.3199952299412865 | 0.1722528744214696 | 0.1656510820082742 | T | T | T |
| 0.5746079456948711 | 0.5553923267641132 | 0.3561805761902156 | T | T | T |
| 0.6894773044774121 | 0.5253999661100404 | 0.2011425591826672 | T | T | T |
| 0.7116151961496466 | 0.5689201443118215 | 0.9883504214333426 | T | T | T |
| 0.8718822267064932 | 0.5710528513525237 | 0.9852805577019222 | T | T | T |
| 0.9270581729563246 | 0.5319233863409891 | 0.1920500842554150 | T | T | T |
| 0.8112637924262075 | 0.5524876194946039 | 0.3361267969164216 | T | T | T |
| 0.5741244326903767 | 0.3277681983386551 | 0.3313312467813204 | T | T | T |
| 0.6938995517402308 | 0.3709916189211749 | 0.1902448619838438 | T | T | T |
| 0.7293863159698841 | 0.3263975228388001 | 0.9785095397470935 | T | T | T |
| 0.8839899027358753 | 0.3265762206386994 | 0.9969189755333996 | T | T | T |
| 0.9403356784043105 | 0.3770732916460380 | 0.1956029233291368 | T | T | T |
| 0.9185651865965870 | 0.4430614847062810 | 0.8581912417276397 | T | T | T |
| 0.8009982221263307 | 0.4711568787780917 | 0.7166961169887157 | T | T | T |
| 0.7713624827940732 | 0.4381063228509586 | 0.4905079484752315 | T | T | T |
| 0.6134599597080747 | 0.4305249213961932 | 0.4891924271762974 | T | T | T |
| 0.5678202025781237 | 0.4690087032617595 | 0.7023748954376976 | T | T | T |
| 0.6764593366723887 | 0.4479783068694258 | 0.8557352824530899 | T | T | T |
| 0.9202998749137338 | 0.6767433639047250 | 0.8303354191107780 | T | T | T |
| 0.7710587252652360 | 0.6669692138851770 | 0.4653764308306342 | T | T | T |
| 0.6156611344390241 | 0.6728899759466016 | 0.4868409065447865 | T | T | T |
| 0.5613129868544491 | 0.6276380413201400 | 0.6972893603277496 | T | T | T |
| 0.6760197318945829 | 0.6728047989701919 | 0.8227214296717975 | T | T | T |
| 0.5782031038780363 | 0.9446515072541287 | 0.3584212091848772 | T | T | T |
| 0.6986922683125201 | 0.9722692031330048 | 0.2139132663321793 | T | T | T |

**Structure files (CONTCAR) involved in this work:**

|                    |                    |                    |   |   |   |
|--------------------|--------------------|--------------------|---|---|---|
| 0.7200921361018181 | 0.9353033843604875 | 0.9928122455393767 | T | T | T |
| 0.8801893722901905 | 0.9336241555947596 | 0.9947174431215642 | T | T | T |
| 0.9322564933894253 | 0.9692399665903626 | 0.2044896969033887 | T | T | T |
| 0.8226471365430121 | 0.9453244455792340 | 0.3544298843319371 | T | T | T |
| 0.5790524299162483 | 0.1725071081867000 | 0.3300468963400519 | T | T | T |
| 0.6987386646490922 | 0.1302346248178927 | 0.1929805789111864 | T | T | T |
| 0.7326610745259668 | 0.1707644574399117 | 0.9728685043025719 | T | T | T |
| 0.8874682686412890 | 0.1734906129404081 | 0.9878777843916134 | T | T | T |
| 0.9372362366954164 | 0.1266498326899671 | 0.1993508319177031 | T | T | T |
| 0.8211462044081458 | 0.1702676705594938 | 0.3299918140511172 | T | T | T |
| 0.9229237722612796 | 0.0556287481021855 | 0.8576311549501867 | T | T | T |
| 0.8031922340262562 | 0.0267378375159031 | 0.7111864001934124 | T | T | T |
| 0.7809086954601466 | 0.0645931209799147 | 0.4923178229710943 | T | T | T |
| 0.6208086260723468 | 0.0689929826024215 | 0.4907780507047534 | T | T | T |
| 0.5684069142690120 | 0.0313310540027152 | 0.6996110529188595 | T | T | T |
| 0.6791195610970667 | 0.0518364830863307 | 0.8497450273366600 | T | T | T |
| 0.9233648491267933 | 0.8292096759974433 | 0.8372008454371298 | T | T | T |
| 0.8042330657211643 | 0.8701452697180430 | 0.6963852260975629 | T | T | T |
| 0.7717591617579020 | 0.8259568076943364 | 0.4790128724313189 | T | T | T |
| 0.6166670064628430 | 0.8264219291249029 | 0.4904138753796259 | T | T | T |
| 0.5649183589166042 | 0.8742287449073449 | 0.6980148605618015 | T | T | T |
| 0.6802508000649024 | 0.8323397955841755 | 0.8305522253082183 | T | T | T |
| 0.4235729568837784 | 0.4425684792680072 | 0.6415395811297626 | T | T | T |
| 0.3039655795306307 | 0.4699890613494597 | 0.7823663052513784 | T | T | T |
| 0.2812179072821847 | 0.4428201950467678 | 0.0070966809300552 | T | T | T |
| 0.1225268989964207 | 0.4361932647674629 | 0.0110190872238352 | T | T | T |
| 0.0647029741826336 | 0.4680325650075282 | 0.8001111531132956 | T | T | T |
| 0.1760818325801960 | 0.4388281875370597 | 0.6557563227546912 | T | T | T |
| 0.4171697339073584 | 0.6743168668565760 | 0.6622246523606502 | T | T | T |
| 0.3010813300909581 | 0.6283044862161430 | 0.7964291140489284 | T | T | T |
| 0.2679514374134691 | 0.6705948816608840 | 0.0161210626395878 | T | T | T |
| 0.1131066451424513 | 0.6730937242720036 | 0.0063396149939400 | T | T | T |
| 0.0640482115577604 | 0.6269091061300986 | 0.7948862549539224 | T | T | T |
| 0.1785551357926028 | 0.6697050627518663 | 0.6612369920581046 | T | T | T |
| 0.0730655572064874 | 0.5588297833243721 | 0.1438969396607665 | T | T | T |
| 0.1936586867435432 | 0.5290112150716558 | 0.2823760084638317 | T | T | T |
| 0.2166894496126048 | 0.5569398390469037 | 0.5110179530832959 | T | T | T |
| 0.3757229433333140 | 0.5656300107282879 | 0.5111314048008140 | T | T | T |
| 0.4291763894876092 | 0.5311132570304097 | 0.2990241100149122 | T | T | T |
| 0.3209584803881901 | 0.5609854776246201 | 0.1505666901077598 | T | T | T |
| 0.0839894764976864 | 0.3263378612915205 | 0.1630690844440067 | T | T | T |
| 0.1969414853580875 | 0.3714342385655222 | 0.2995978395952402 | T | T | T |
| 0.2314587556996010 | 0.3308811612639749 | 0.5182739124543074 | T | T | T |
| 0.3866016781262734 | 0.3276697003233313 | 0.5046275658671550 | T | T | T |
| 0.4326468455371830 | 0.3730179532452179 | 0.2915112883104161 | T | T | T |
| 0.3171623499586962 | 0.3301024438963927 | 0.1614752075502353 | T | T | T |
| 0.3592090199315515 | 0.0697148296821976 | 0.7223333033146191 | T | T | T |
| 0.3157266158031430 | 0.0525594750077783 | 0.9065462092939278 | T | T | T |
| 0.2019720025554589 | 0.0504538433038013 | 0.0096463986271343 | T | T | T |
| 0.0928053763791573 | 0.0694040991835087 | 0.9007155262159883 | T | T | T |
| 0.1033399329346253 | 0.0648786116308278 | 0.7035925562172992 | T | T | T |
| 0.2293395430962213 | 0.0518542710887724 | 0.7587249230772032 | T | T | T |
| 0.3611964771127481 | 0.8277180488288979 | 0.7524587952004301 | T | T | T |

**Structure files (CONTCAR) involved in this work:**

|                    |                    |                    |   |   |   |
|--------------------|--------------------|--------------------|---|---|---|
| 0.3021225777252836 | 0.8620213790929857 | 0.9199511971012563 | T | T | T |
| 0.1888526791976372 | 0.8529338097719193 | 0.0197235519812250 | T | T | T |
| 0.0878070311417893 | 0.8326692765632487 | 0.8954888217096624 | T | T | T |
| 0.1030946902039441 | 0.8416952974920124 | 0.6998987389846176 | T | T | T |
| 0.2295256806538296 | 0.8481019616253790 | 0.7561931831854567 | T | T | T |
| 0.3147552148091101 | 0.9506628021052111 | 0.7737020863731249 | T | T | T |
| 0.0867748367889171 | 0.9524073875360566 | 0.8082852133010335 | T | T | T |
| 0.4333152012000067 | 0.1282192012558057 | 0.5836536993325524 | T | T | T |
| 0.4125472772848650 | 0.9975423822398058 | 0.5723548119069797 | T | T | T |
| 0.3928341478685816 | 0.8656770173688936 | 0.5683465230059430 | T | T | T |
| 0.1961068921958729 | 0.1371409258419306 | 0.6152153197239306 | T | T | T |
| 0.1884105013248289 | 0.0046875571219665 | 0.5824914726581176 | T | T | T |
| 0.1964438814156212 | 0.8710970674552586 | 0.5650835926330406 | T | T | T |
| 0.9873248045799107 | 0.0416039097473258 | 0.7869831278971248 | T | T | T |
| 0.9850806431354878 | 0.8680652976531265 | 0.7819741310257688 | T | T | T |
| 0.1414004540581334 | 0.9312528169653235 | 0.2204070781084107 | T | T | T |
| 0.1832189452102206 | 0.9477485434637893 | 0.4059793606759312 | T | T | T |
| 0.2971319884366416 | 0.9495455877398652 | 0.5085786419229515 | T | T | T |
| 0.4068779328800663 | 0.9313188757212977 | 0.4014176334234857 | T | T | T |
| 0.3966392903449630 | 0.9359050379754035 | 0.2041813429607559 | T | T | T |
| 0.2706123301380863 | 0.9493103326899971 | 0.2592858598715104 | T | T | T |
| 0.1412218195689991 | 0.1742275035363986 | 0.2486592858520343 | T | T | T |
| 0.1957934537622340 | 0.1404579899596414 | 0.4196097640181528 | T | T | T |
| 0.3107393688246468 | 0.1481731413063655 | 0.5157841336061216 | T | T | T |
| 0.4144168823594411 | 0.1674331779703340 | 0.3954288747637911 | T | T | T |
| 0.3970198175865252 | 0.1590124950655805 | 0.1999809099114681 | T | T | T |
| 0.2718367734542277 | 0.1507772120592750 | 0.2587738337012899 | T | T | T |
| 0.1842681664631574 | 0.0502414002250999 | 0.2747914166729813 | T | T | T |
| 0.4163583822443393 | 0.0479334182740217 | 0.3077875417445535 | T | T | T |
| 0.0657085716265857 | 0.8731122665208387 | 0.0828162681115784 | T | T | T |
| 0.0857643879829215 | 0.0041527267559855 | 0.0728531485446319 | T | T | T |
| 0.1065499649210199 | 0.1358742775969639 | 0.0661823723863445 | T | T | T |
| 0.3043657327049493 | 0.8632623956956309 | 0.1160749035260693 | T | T | T |
| 0.3111400958888650 | 0.9953619340605737 | 0.0826097761872771 | T | T | T |
| 0.3026930769604353 | 0.1287184855647747 | 0.0664652410915667 | T | T | T |
| 0.5130634354406427 | 0.9549354925324032 | 0.2878867274594822 | T | T | T |
| 0.5163160923238521 | 0.1332048913579622 | 0.2785640727677214 | T | T | T |
| 0.6396854807384714 | 0.5554818501248679 | 0.2847982225051638 | T | T | T |
| 0.6900277915739983 | 0.5753258425012023 | 0.1053035762028491 | T | T | T |
| 0.7920004013112618 | 0.5597765413588657 | 0.9764658004593145 | T | T | T |
| 0.8923940461387734 | 0.5748958265019651 | 0.1034160546544525 | T | T | T |
| 0.8887155916014741 | 0.5425117525944420 | 0.2997311609748836 | T | T | T |
| 0.7647088181467740 | 0.5243960163421414 | 0.2482096188542587 | T | T | T |
| 0.6411756787340808 | 0.3350066352790703 | 0.2655633860895691 | T | T | T |
| 0.6887579492770951 | 0.3326925690995765 | 0.0828219423151971 | T | T | T |
| 0.8065591432833318 | 0.3508668771766950 | 0.9941585134039603 | T | T | T |
| 0.9095918377581891 | 0.3260412913340769 | 0.1133153331689923 | T | T | T |
| 0.9053830620539111 | 0.3632108464378219 | 0.3061601912915877 | T | T | T |
| 0.7681631360409903 | 0.3671625141669185 | 0.2351484927470311 | T | T | T |
| 0.6700110149220950 | 0.4489417698107128 | 0.1721967532017760 | T | T | T |
| 0.9228610912337282 | 0.4530773042180530 | 0.1612448573951457 | T | T | T |
| 0.5705881944507697 | 0.6274648955558171 | 0.4121319932687609 | T | T | T |
| 0.5784010402072114 | 0.4963221530940946 | 0.4402038701235994 | T | T | T |

**Structure files (CONTCAR) involved in this work:**

|                    |                    |                    |   |   |   |
|--------------------|--------------------|--------------------|---|---|---|
| 0.5833977276966380 | 0.3624188850999507 | 0.4408711252199351 | T | T | T |
| 0.7980064571173028 | 0.6308294748269809 | 0.3630328728673703 | T | T | T |
| 0.7991122167189229 | 0.5106482526029830 | 0.4421678905826765 | T | T | T |
| 0.8142619986676838 | 0.3785249573241803 | 0.4394655717937166 | T | T | T |
| 0.0046393324600699 | 0.5525531876286410 | 0.2091981927925627 | T | T | T |
| 0.0201604926553802 | 0.3674337277635955 | 0.2082958065487520 | T | T | T |
| 0.8552938282789778 | 0.4299804575536317 | 0.7832484007185546 | T | T | T |
| 0.7861758700688835 | 0.4357563531458611 | 0.6091544725101670 | T | T | T |
| 0.6931201074658653 | 0.4332636118391396 | 0.4647103815285472 | T | T | T |
| 0.6011191512197411 | 0.4290390925406361 | 0.6084040185114744 | T | T | T |
| 0.6031980981629228 | 0.4437116897801351 | 0.8045228317450976 | T | T | T |
| 0.7304380709808229 | 0.4758647580874539 | 0.7746019198344526 | T | T | T |
| 0.8615901352662910 | 0.6792895761741101 | 0.7500576882461364 | T | T | T |
| 0.8170180646293831 | 0.6379505044584967 | 0.5577532566789823 | T | T | T |
| 0.6932104053471170 | 0.6467759773384831 | 0.4854539419836173 | T | T | T |
| 0.5859570582414595 | 0.6679162500599320 | 0.5985855674977303 | T | T | T |
| 0.5972608156622256 | 0.6603871103425039 | 0.7944606233656980 | T | T | T |
| 0.7226316445365125 | 0.6442226572000394 | 0.7340788797300964 | T | T | T |
| 0.8305830593059373 | 0.5462148198279884 | 0.6929346782385939 | T | T | T |
| 0.5804744514541995 | 0.5487276087268584 | 0.6857000684349592 | T | T | T |
| 0.9287614097185483 | 0.3775782113792927 | 0.9297822555838854 | T | T | T |
| 0.9079694027870845 | 0.5080569804088089 | 0.9299416158313965 | T | T | T |
| 0.8964646323237986 | 0.6403785885348158 | 0.9342692994661381 | T | T | T |
| 0.6958861288841203 | 0.3731663214743293 | 0.8930414182372497 | T | T | T |
| 0.6746802203180211 | 0.5014646118312061 | 0.9470734869886940 | T | T | T |
| 0.6890262866872930 | 0.6360256517535131 | 0.9300261538986118 | T | T | T |
| 0.4887815987788265 | 0.4518246145023214 | 0.7121090859865854 | T | T | T |
| 0.4807655986180528 | 0.6345917656346374 | 0.7092113134627213 | T | T | T |
| 0.6437078585306043 | 0.9396184530134513 | 0.2880360075576761 | T | T | T |
| 0.6990822574293492 | 0.9305747051619500 | 0.1096626138807453 | T | T | T |
| 0.8004096308771903 | 0.9442647596417120 | 0.9803973658768608 | T | T | T |
| 0.8993776888330361 | 0.9276398697608145 | 0.1121225963285385 | T | T | T |
| 0.8979047126733619 | 0.9481141867357130 | 0.3095900014362620 | T | T | T |
| 0.7717892809881437 | 0.9665111474075156 | 0.2653115158111034 | T | T | T |
| 0.6424012593416719 | 0.1710707271750742 | 0.2550890602656768 | T | T | T |
| 0.6963573052576102 | 0.1582846601862476 | 0.0794415018666655 | T | T | T |
| 0.8104694109088689 | 0.1475279368964787 | 0.9822562545064174 | T | T | T |
| 0.9142578476652952 | 0.1691977252276700 | 0.1017833651476431 | T | T | T |
| 0.8981667697356530 | 0.1528077740422920 | 0.2979141284362711 | T | T | T |
| 0.7721936469257120 | 0.1415903774460511 | 0.2414158667021495 | T | T | T |
| 0.6806137630372543 | 0.0505961358587345 | 0.1936562062500715 | T | T | T |
| 0.9205770370801835 | 0.0481529035990815 | 0.1799655002884985 | T | T | T |
| 0.5710842559419647 | 0.8748740459544603 | 0.4208283145469475 | T | T | T |
| 0.5821750779594586 | 0.0067019699819608 | 0.4373572404059830 | T | T | T |
| 0.5993832864273722 | 0.1386865250328571 | 0.4364350377300898 | T | T | T |
| 0.8091319422155956 | 0.8690801659484417 | 0.3929185966549826 | T | T | T |
| 0.8160289661652750 | 0.9972171859167637 | 0.4474945712108030 | T | T | T |
| 0.8051727331082172 | 0.1316994129951277 | 0.4348092494807946 | T | T | T |
| 0.0112572759493705 | 0.9529543943665654 | 0.2170452469505879 | T | T | T |
| 0.0171008342348459 | 0.1365578788029753 | 0.2164796510475600 | T | T | T |
| 0.8569169785746578 | 0.0590044484024293 | 0.7878691025700508 | T | T | T |
| 0.8019975864561867 | 0.0710541714018936 | 0.6092607874615251 | T | T | T |
| 0.7004583643993119 | 0.0562089466915035 | 0.4805619978613871 | T | T | T |



**Structure files (CONTCAR) involved in this work:**

|                     |                    |                    |   |   |   |
|---------------------|--------------------|--------------------|---|---|---|
| 0.5991892102697316  | 0.0748284552265031 | 0.6073558362728901 | T | T | T |
| 0.6039726447753901  | 0.0514829847613285 | 0.8043473841185379 | T | T | T |
| 0.7295403181417801  | 0.0277644606206877 | 0.7616368358587855 | T | T | T |
| 0.8586751489538902  | 0.8324308443152432 | 0.7651992758466207 | T | T | T |
| 0.8073767205324170  | 0.8358361642845132 | 0.5866660710295917 | T | T | T |
| 0.6943579782902443  | 0.8507463834376711 | 0.4859033466154184 | T | T | T |
| 0.5903137526287263  | 0.8283513628850215 | 0.6049609272606767 | T | T | T |
| 0.6037933312482856  | 0.8512580886579557 | 0.7990414462873250 | T | T | T |
| 0.7299746130535627  | 0.8617245612180627 | 0.7441444477428890 | T | T | T |
| 0.8229433378161745  | 0.9493162501555287 | 0.6865808619443102 | T | T | T |
| 0.5806579016310670  | 0.9524861246849489 | 0.6732394362295979 | T | T | T |
| 0.9326738031683359  | 0.1276184079115893 | 0.9137473147813198 | T | T | T |
| 0.9178379425580453  | 0.9970706084846959 | 0.9424127117214115 | T | T | T |
| 0.9051362004538843  | 0.8642981032137884 | 0.9433164295402424 | T | T | T |
| 0.6964446187030418  | 0.1275779548331967 | 0.8858741597825832 | T | T | T |
| 0.6833854046965427  | 0.0005447133324061 | 0.9440905778988665 | T | T | T |
| 0.6968856042225395  | 0.8664496682563386 | 0.9380468465283298 | T | T | T |
| 0.4894203496398080  | 0.0468596693940895 | 0.7148541635827615 | T | T | T |
| 0.4850989740484690  | 0.8643842652226593 | 0.7143954822117871 | T | T | T |
| 0.3576342544782706  | 0.4323944022608812 | 0.7107622712323985 | T | T | T |
| 0.3098659027221863  | 0.4390055033489882 | 0.8940014891351517 | T | T | T |
| 0.2010532934660741  | 0.4565587587773279 | 0.0089677623789735 | T | T | T |
| 0.0937299430499615  | 0.4302775775621123 | 0.8986422801760499 | T | T | T |
| 0.1008557294370233  | 0.4375943169094051 | 0.7011298144802511 | T | T | T |
| 0.2279117880344994  | 0.4581341543537898 | 0.7446343343500961 | T | T | T |
| 0.3568139716381304  | 0.6747988382394947 | 0.7430502941556348 | T | T | T |
| 0.3023821557842181  | 0.6438229664045489 | 0.9145235681575554 | T | T | T |
| 0.1899521895076317  | 0.6476408750865587 | 0.0179084640452701 | T | T | T |
| 0.0910727809325381  | 0.6695580439066738 | 0.8901281793617369 | T | T | T |
| 0.1016223686019855  | 0.6551297461493554 | 0.6950741757013663 | T | T | T |
| 0.2273807273960201  | 0.6452424576261345 | 0.7517928901286896 | T | T | T |
| 0.3202058482947432  | 0.5499623424590694 | 0.7786821511541664 | T | T | T |
| 0.0812850767285247  | 0.5477715675575632 | 0.8101609548619669 | T | T | T |
| 0.4336212040072897  | 0.3762272970682919 | 0.5720734985945319 | T | T | T |
| 0.4178550627828751  | 0.5078782738450995 | 0.5690201142928668 | T | T | T |
| 0.3915618961896308  | 0.6385453165936843 | 0.5598598687490671 | T | T | T |
| 0.1940022529421326  | 0.3644133819060897 | 0.6134266979447720 | T | T | T |
| 0.1800262619856168  | 0.4946353474320959 | 0.5671097996884019 | T | T | T |
| 0.1951170746410358  | 0.6285115840278652 | 0.5594805064355582 | T | T | T |
| 0.9850092165583378  | 0.4543649483175712 | 0.7908126456082364 | T | T | T |
| 0.9840936861081760  | 0.6359786915983703 | 0.7826663013730286 | T | T | T |
| 0.1362100723232962  | 0.5678912932171541 | 0.2189813037265565 | T | T | T |
| 0.1933736377610430  | 0.5571235130690686 | 0.3954342976243111 | T | T | T |
| 0.2969598157503557  | 0.5470872941709723 | 0.5202320290542387 | T | T | T |
| 0.3981883927742776  | 0.5697527997919926 | 0.3951799945878584 | T | T | T |
| 0.3952833446025299  | 0.5602670987538073 | 0.1980736063828059 | T | T | T |
| 0.2672625018209946  | 0.5420221588499692 | 0.2368353714076026 | T | T | T |
| 0.14109088271110745 | 0.3237351132435795 | 0.2485827066788754 | T | T | T |
| 0.1950673458593082  | 0.3588247295199501 | 0.4184710018619734 | T | T | T |
| 0.3095733471453880  | 0.3532039556050818 | 0.5152207539579446 | T | T | T |
| 0.4092991305348059  | 0.3295602229165115 | 0.3882904626798594 | T | T | T |
| 0.3942070778105658  | 0.3457694758158310 | 0.1923583296183014 | T | T | T |
| 0.2703478948986658  | 0.3531968431411933 | 0.2554322185896020 | T | T | T |

**Structure files (CONTCAR) involved in this work:**

|                     |                    |                    |   |   |   |
|---------------------|--------------------|--------------------|---|---|---|
| 0.1772637250482706  | 0.4490874048060345 | 0.2765889993633449 | T | T | T |
| 0.4140842227244324  | 0.4512995232576893 | 0.3113502397671581 | T | T | T |
| 0.0656730972689450  | 0.6250169760763028 | 0.0738528333707736 | T | T | T |
| 0.0812516300397992  | 0.4927695708275691 | 0.0734450308984848 | T | T | T |
| 0.1123763490121930  | 0.3632243839142289 | 0.0635763034565494 | T | T | T |
| 0.3064195133735576  | 0.6362746537265908 | 0.1096024894360398 | T | T | T |
| 0.3178725036832375  | 0.5056079641529592 | 0.0616031502868473 | T | T | T |
| 0.2972379113068038  | 0.3717497428074145 | 0.0616343388289380 | T | T | T |
| 0.5086429441264592  | 0.5447025528626941 | 0.2883797306360263 | T | T | T |
| 0.5123531445442985  | 0.3640461263795796 | 0.2729660530663091 | T | T | T |
| 0.4375414604668557  | 0.7512106432714856 | 0.6369019977092928 | T | T | T |
| 0.1891361573360184  | 0.7488164776800663 | 0.6370738977482945 | T | T | T |
| 0.2749754122196213  | 0.7510578120369694 | 0.0239845875465680 | T | T | T |
| 0.1057742486556772  | 0.7495661605150878 | 0.0463875658466771 | T | T | T |
| 0.0622412225008748  | 0.2501487132417963 | 0.1360320679938780 | T | T | T |
| 0.3079432403292001  | 0.2507525493810228 | 0.1379435129961439 | T | T | T |
| 0.2244926688104140  | 0.2502852567048892 | 0.5250818958514156 | T | T | T |
| 0.3935235548339029  | 0.2512805029295312 | 0.5452383511629206 | T | T | T |
| 0.5571053594482726  | 0.2494850989055997 | 0.3511961794458563 | T | T | T |
| 0.8126830150624164  | 0.2492479554562867 | 0.3447540398437412 | T | T | T |
| 0.7273464026722454  | 0.2491362105164084 | 0.9402901526083188 | T | T | T |
| 0.8923838320082405  | 0.2513992844461099 | 0.9520774284537237 | T | T | T |
| 0.9447717330528905  | 0.7522533650852017 | 0.8600280808710130 | T | T | T |
| 0.6890942052157025  | 0.7522786377966403 | 0.8416743849398596 | T | T | T |
| 0.7776215896979664  | 0.7470796526600547 | 0.4493328276789154 | T | T | T |
| 0.6113643130756223  | 0.7500569175424147 | 0.4486787193810761 | T | T | T |
| 0.9355792770187953  | 0.4779629867988744 | 0.5244335777730093 | T | T | T |
| 0.8188277283474048  | 0.3333125845246403 | 0.3256621355671163 | T | T | T |
| 0.8024190931847459  | 0.6320146818222376 | 0.6907011239857680 | T | T | T |
| 0.9150109323280415  | 0.4200332780186668 | 0.4264498062962871 | T | T | T |
| 0.8814782509867285  | 0.5499497111950780 | 0.5565015451064605 | T | T | T |
| 0.0379762723900072  | 0.5825389010012917 | 0.4479946987252142 | T | T | T |
| -0.0079412627323439 | 0.6345279879482600 | 0.4951092412742133 | T | T | T |
| 0.0719925743378169  | 0.5610105299662722 | 0.5036882545774881 | T | T | T |
| 0.0677975503498058  | 0.6049858636062928 | 0.3879377401979958 | T | T | T |
| 0.0093600145662904  | 0.5404811236822713 | 0.4171216652590755 | T | T | T |
| 0.9515898150003337  | 0.6499671603434887 | 0.4443497070023105 | T | T | T |
| -0.0296895426206927 | 0.6158281322925584 | 0.5665339777339846 | T | T | T |
| 0.0189069270570982  | 0.6802929447858022 | 0.5177381061651061 | T | T | T |

**Figure S15(b)TS4**

Si O Al Zn C H

1.0000000000000000

20.0219999999999985 0.0000000000000000 0.0000000000000000

0.0000000000000000 19.8990000000000009 0.0000000000000000

0.0000000000000000 0.0000000000000000 13.3829999999999991

94 193 2 2 2 6

Selective dynamics

Direct

|                    |                    |                    |   |   |   |
|--------------------|--------------------|--------------------|---|---|---|
| 0.4231186789575326 | 0.0600280371513692 | 0.6489163348239140 | T | T | T |
| 0.3048464791764791 | 0.0306580747822721 | 0.7911272431788534 | T | T | T |
| 0.2826612623120333 | 0.0570396479985675 | 0.0167886628674486 | T | T | T |
| 0.1224451143466746 | 0.0643786675719463 | 0.0126684177873713 | T | T | T |
| 0.0674801788955570 | 0.0313996901850847 | 0.8003705575662486 | T | T | T |

**Structure files (CONTCAR) involved in this work:**

|                    |                    |                    |   |   |   |
|--------------------|--------------------|--------------------|---|---|---|
| 0.1801081824455195 | 0.0641187067423501 | 0.6638206870260364 | T | T | T |
| 0.4190823132593871 | 0.8275590342450654 | 0.6678200568973901 | T | T | T |
| 0.3014023442507296 | 0.8718195469933694 | 0.8004403162408109 | T | T | T |
| 0.2668957587997328 | 0.8316813410537568 | 0.0195569871260919 | T | T | T |
| 0.1116628644418040 | 0.8271554989995028 | 0.0106157266170786 | T | T | T |
| 0.0652355343160163 | 0.8739180928116418 | 0.7966040081591537 | T | T | T |
| 0.1797082481197908 | 0.8275942774956767 | 0.6651686351602194 | T | T | T |
| 0.0767523774233652 | 0.9410066413698762 | 0.1486645859105511 | T | T | T |
| 0.1949094187714198 | 0.9696226147710945 | 0.2912851994129175 | T | T | T |
| 0.2170115742229123 | 0.9427853203088359 | 0.5163184526441510 | T | T | T |
| 0.3771424625635507 | 0.9365990303477129 | 0.5130481248032472 | T | T | T |
| 0.4335243600219774 | 0.9684895007863017 | 0.3006753079474480 | T | T | T |
| 0.3199703283513129 | 0.9361812526962880 | 0.1647109740615139 | T | T | T |
| 0.0810271468631763 | 0.1731634775045780 | 0.1669407306668945 | T | T | T |
| 0.1984347672062984 | 0.1286609224168960 | 0.3004713807273492 | T | T | T |
| 0.2325344647006729 | 0.1697200576081472 | 0.5189148143460329 | T | T | T |
| 0.3879992285547606 | 0.1736288477692949 | 0.5098560952990817 | T | T | T |
| 0.4360234807744546 | 0.1269304191104643 | 0.2958536762862519 | T | T | T |
| 0.3199771425930920 | 0.1721764928029559 | 0.1656421826431479 | T | T | T |
| 0.5731688024014940 | 0.5563337467854114 | 0.3547765949019961 | T | T | T |
| 0.6896884494217429 | 0.5255620274337616 | 0.2043104559040202 | T | T | T |
| 0.7116532111391118 | 0.5684826513136215 | 0.9879847529438669 | T | T | T |
| 0.8713715181572298 | 0.5708652034974344 | 0.9839066000824158 | T | T | T |
| 0.9246530261503491 | 0.5292116248388042 | 0.1900109516989277 | T | T | T |
| 0.8127589746751659 | 0.5528287905038257 | 0.3407283531255910 | T | T | T |
| 0.5752086624090677 | 0.3277941859265562 | 0.3305422917038996 | T | T | T |
| 0.6933298520653993 | 0.3712743513852816 | 0.1879093704360132 | T | T | T |
| 0.7293678073252270 | 0.3268479990827617 | 0.9756348479437926 | T | T | T |
| 0.8841429137359156 | 0.3253840906043161 | 0.9926607063932096 | T | T | T |
| 0.9397502358696713 | 0.3744862877554054 | 0.1918824016864674 | T | T | T |
| 0.9186464996759699 | 0.4434036739413263 | 0.8568188138765079 | T | T | T |
| 0.8006246360659842 | 0.4712567882952394 | 0.7142787914809360 | T | T | T |
| 0.7742313313113801 | 0.4390530792461567 | 0.4901584970184352 | T | T | T |
| 0.6159810300975639 | 0.4320260173760867 | 0.4873573431258504 | T | T | T |
| 0.5685716090589660 | 0.4697074636918599 | 0.7000612374839184 | T | T | T |
| 0.6767592078352320 | 0.4483661581392633 | 0.8534354641084866 | T | T | T |
| 0.9202080897608431 | 0.6760516791768467 | 0.8311233362791349 | T | T | T |
| 0.7685995534356677 | 0.6693737458838684 | 0.4636891642466878 | T | T | T |
| 0.6134957694547855 | 0.6734755893346877 | 0.4839013152233522 | T | T | T |
| 0.5612046855249286 | 0.6281847398466944 | 0.6955833548351663 | T | T | T |
| 0.6739500678918636 | 0.6721028000344059 | 0.8254953229518800 | T | T | T |
| 0.5778886988608120 | 0.9452260707918877 | 0.3581238679004317 | T | T | T |
| 0.6983814311878607 | 0.9723308181811137 | 0.2137683813530489 | T | T | T |
| 0.7202474860481135 | 0.9348738422571595 | 0.9931566840352176 | T | T | T |
| 0.8803005943548053 | 0.9328401927643323 | 0.9944856239612377 | T | T | T |
| 0.9320827483172694 | 0.9695655153449049 | 0.2041842800421878 | T | T | T |
| 0.8224476833243651 | 0.9466521204858002 | 0.3543105431096781 | T | T | T |
| 0.5791384219820925 | 0.1726474128152436 | 0.3310762448681202 | T | T | T |
| 0.6981041897780734 | 0.1296365188095024 | 0.1928533915325888 | T | T | T |
| 0.7320822416461904 | 0.1708066680175235 | 0.9728944805127383 | T | T | T |
| 0.8870426504721460 | 0.1728569889188559 | 0.9861260888482496 | T | T | T |
| 0.9364251739027341 | 0.1272208254263200 | 0.1985261791017767 | T | T | T |
| 0.8198869993580731 | 0.1703006993857266 | 0.3296038130785522 | T | T | T |

**Structure files (CONTCAR) involved in this work:**

|                    |                    |                    |   |   |   |
|--------------------|--------------------|--------------------|---|---|---|
| 0.9229910650884116 | 0.0542287846070613 | 0.8569888978688296 | T | T | T |
| 0.8025602213306519 | 0.0256670170462563 | 0.7105284797098717 | T | T | T |
| 0.7810281025362301 | 0.0653331043538636 | 0.4926685837644275 | T | T | T |
| 0.6209607118610512 | 0.0691568736971339 | 0.4912444530340848 | T | T | T |
| 0.5683901289588393 | 0.0309508808002960 | 0.7001303698652502 | T | T | T |
| 0.6789618536915712 | 0.0513940679105563 | 0.8503385573475410 | T | T | T |
| 0.9230070186336170 | 0.8289258853283681 | 0.8360650232342436 | T | T | T |
| 0.8031792178659780 | 0.8689053972313046 | 0.6948450770906442 | T | T | T |
| 0.7694983678557525 | 0.8267389091390883 | 0.4772087671684763 | T | T | T |
| 0.6148359815428062 | 0.8269703048751484 | 0.4898678677340987 | T | T | T |
| 0.5642976020323358 | 0.8737577780094133 | 0.6984296918549326 | T | T | T |
| 0.6797306469984624 | 0.8315796390984970 | 0.8311968066419505 | T | T | T |
| 0.4234524131669167 | 0.4428621906208530 | 0.6397480712132516 | T | T | T |
| 0.3043076230038503 | 0.4699888495036167 | 0.7813942271588143 | T | T | T |
| 0.2810636431661425 | 0.4420887752387981 | 0.0057531850502696 | T | T | T |
| 0.1223237346498787 | 0.4349389875457088 | 0.0080973520578005 | T | T | T |
| 0.0645800893287506 | 0.4679726003912746 | 0.7987629696800749 | T | T | T |
| 0.1759826595404717 | 0.4392536196978113 | 0.6545133164454797 | T | T | T |
| 0.4164998187572403 | 0.6740979502010060 | 0.6604327922578217 | T | T | T |
| 0.3009110212496502 | 0.6281149471431312 | 0.7952864095418631 | T | T | T |
| 0.2672135084965624 | 0.6705867010456061 | 0.0155016108611192 | T | T | T |
| 0.1125195888290090 | 0.6731409842341308 | 0.0062325287145887 | T | T | T |
| 0.0637780463817876 | 0.6267682283688493 | 0.7952277699345491 | T | T | T |
| 0.1777910088906412 | 0.6696132284007379 | 0.6604939997678120 | T | T | T |
| 0.0716574107592010 | 0.5576882532741565 | 0.1402353850186809 | T | T | T |
| 0.1915153579046819 | 0.5292996880794498 | 0.2813081103825535 | T | T | T |
| 0.2141995602931819 | 0.5575149259901440 | 0.5090549133397364 | T | T | T |
| 0.3736720856731482 | 0.5658444627006288 | 0.5093328312981663 | T | T | T |
| 0.4278393834067037 | 0.5301829409804376 | 0.2984443986177294 | T | T | T |
| 0.3194533651555611 | 0.5608416974301837 | 0.1501824878122730 | T | T | T |
| 0.0838538543530383 | 0.3261256841902156 | 0.1617544508102035 | T | T | T |
| 0.1969429868948363 | 0.3713517618464667 | 0.2985483543790617 | T | T | T |
| 0.2316667472000187 | 0.3308933615606209 | 0.5175325620035438 | T | T | T |
| 0.3866375441387893 | 0.3274327534466067 | 0.5040532314585094 | T | T | T |
| 0.4327822772005204 | 0.3723349553179186 | 0.2915060467307386 | T | T | T |
| 0.3175167943310954 | 0.3298753908427113 | 0.1608069834945501 | T | T | T |
| 0.3592492974289782 | 0.0694702922920918 | 0.7223691463050090 | T | T | T |
| 0.3158303697886851 | 0.0523785495527608 | 0.9064940955426177 | T | T | T |
| 0.2021257504354780 | 0.0507890286372230 | 0.0097169825391145 | T | T | T |
| 0.0929066967462880 | 0.0692539234304011 | 0.9006102964778261 | T | T | T |
| 0.1035459991249876 | 0.0646092352156156 | 0.7035435471333104 | T | T | T |
| 0.2294790827500179 | 0.0514273399928665 | 0.7586066701821241 | T | T | T |
| 0.3606036688563827 | 0.8270906915852362 | 0.7518750984988086 | T | T | T |
| 0.3023454536374302 | 0.8617092073701698 | 0.9202378150818858 | T | T | T |
| 0.1885454916365799 | 0.8531569080203802 | 0.0192266359283701 | T | T | T |
| 0.0872161600311976 | 0.8324885455132890 | 0.8957176068338528 | T | T | T |
| 0.1029787159691103 | 0.8416361414878450 | 0.6999901089282707 | T | T | T |
| 0.2291897403982707 | 0.8479839288605265 | 0.7571873758720498 | T | T | T |
| 0.3149557654623092 | 0.9503090965468726 | 0.7739204330965076 | T | T | T |
| 0.0869705328132484 | 0.9521554704443809 | 0.8085544696555179 | T | T | T |
| 0.4334558591911798 | 0.1284345750231190 | 0.5842594837658326 | T | T | T |
| 0.4129079344890744 | 0.9977725560214210 | 0.5722410026495621 | T | T | T |
| 0.3929267139305302 | 0.8659572945239374 | 0.5683097269013416 | T | T | T |

**Structure files (CONTCAR) involved in this work:**

|                    |                    |                    |   |   |   |
|--------------------|--------------------|--------------------|---|---|---|
| 0.1961872502184177 | 0.1370472151678834 | 0.6153792117684247 | T | T | T |
| 0.1885192939110216 | 0.0046751642794245 | 0.5821291506846725 | T | T | T |
| 0.1970998242230937 | 0.8710492475575042 | 0.5659326690111123 | T | T | T |
| 0.9875717134433843 | 0.0410586064270723 | 0.7864037428163890 | T | T | T |
| 0.9848599775533634 | 0.8682104322701287 | 0.7817863711021448 | T | T | T |
| 0.1412694808812683 | 0.9311495362882840 | 0.2207494094273675 | T | T | T |
| 0.1833880434125839 | 0.9469360889394584 | 0.4062010395104266 | T | T | T |
| 0.2974040283314737 | 0.9498317076271159 | 0.5084890797753158 | T | T | T |
| 0.4072475369752957 | 0.9317182436646322 | 0.4013285945983334 | T | T | T |
| 0.3965247288946552 | 0.9358361917824097 | 0.2042065948692116 | T | T | T |
| 0.2705624255472120 | 0.9495055639549258 | 0.2593509325681907 | T | T | T |
| 0.1406811025111077 | 0.1738335113959782 | 0.2489237103590981 | T | T | T |
| 0.1958432217309745 | 0.1410814535016631 | 0.4197041876326695 | T | T | T |
| 0.3108110109335297 | 0.1479312107667996 | 0.5161085405391208 | T | T | T |
| 0.4143731689836580 | 0.1674704831084622 | 0.3959679051667048 | T | T | T |
| 0.3970008837321145 | 0.1595719716252307 | 0.2004457277228731 | T | T | T |
| 0.2715118266875073 | 0.1505226593993179 | 0.2583299125667423 | T | T | T |
| 0.1839636248035513 | 0.0500749504097678 | 0.2760387357288375 | T | T | T |
| 0.4159209500116290 | 0.0482665595384251 | 0.3072946586879174 | T | T | T |
| 0.0655300353323468 | 0.8729704511593969 | 0.0833224119749150 | T | T | T |
| 0.0861449164553750 | 0.0037911715992013 | 0.0725736608298029 | T | T | T |
| 0.1061944657936150 | 0.1355316169399074 | 0.0663648846871491 | T | T | T |
| 0.3038833112077100 | 0.8631919863846356 | 0.1163767656505126 | T | T | T |
| 0.3111070872625318 | 0.9951802304812793 | 0.0824889294581922 | T | T | T |
| 0.3032741533423427 | 0.1285487380034081 | 0.0663535429428981 | T | T | T |
| 0.5130966780919867 | 0.9561185038975020 | 0.2870160014987636 | T | T | T |
| 0.5162613533079226 | 0.1336067173974055 | 0.2794537703877648 | T | T | T |
| 0.6372634905967403 | 0.5586454953130618 | 0.2815680191335806 | T | T | T |
| 0.6950751855630374 | 0.5735351418259704 | 0.1067039855688155 | T | T | T |
| 0.7916790876278176 | 0.5616473266287701 | 0.9685827078540165 | T | T | T |
| 0.8881966018743795 | 0.5724368575087421 | 0.1033344217781380 | T | T | T |
| 0.8884508963313473 | 0.5407272692183552 | 0.2986959200187260 | T | T | T |
| 0.7623682924224113 | 0.5225136163538373 | 0.2591783892343200 | T | T | T |
| 0.6411114324532698 | 0.3332678869626707 | 0.2618094785038420 | T | T | T |
| 0.6877892139336202 | 0.3356762486226975 | 0.0786017090332461 | T | T | T |
| 0.8068529328343982 | 0.3501481502693994 | 0.9920211656248905 | T | T | T |
| 0.9109956445943318 | 0.3236014191901020 | 0.1082078945177443 | T | T | T |
| 0.9052181315643982 | 0.3573702645621979 | 0.3014425670346472 | T | T | T |
| 0.7679879118335741 | 0.3665832894422876 | 0.2311274897622539 | T | T | T |
| 0.6689569755737288 | 0.4494398373486965 | 0.1754876307307276 | T | T | T |
| 0.9193878701217617 | 0.4502680459843356 | 0.1600810970273239 | T | T | T |
| 0.5665035004531462 | 0.6280095540874890 | 0.4115841073520752 | T | T | T |
| 0.5798017403731111 | 0.4971186779621480 | 0.4382939795073523 | T | T | T |
| 0.5873912280248059 | 0.3633199268266038 | 0.4388229032852021 | T | T | T |
| 0.8003648296142962 | 0.6314275524905949 | 0.3653665883725857 | T | T | T |
| 0.8050915209676498 | 0.5125176255536718 | 0.4495704556434167 | T | T | T |
| 0.8158460381593674 | 0.3801591274323753 | 0.4348191286501262 | T | T | T |
| 0.0026621921092833 | 0.5491071273779362 | 0.2030300542551400 | T | T | T |
| 0.0198579085070887 | 0.3677389588150690 | 0.2056263024793252 | T | T | T |
| 0.8550355123602109 | 0.4317729950531196 | 0.7824369808986371 | T | T | T |
| 0.7886773852805882 | 0.4323660549851492 | 0.6086776074639356 | T | T | T |
| 0.6958524598177722 | 0.4368930415340688 | 0.4635782970243406 | T | T | T |
| 0.6029592475813117 | 0.4300759826219283 | 0.6065347643501349 | T | T | T |

**Structure files (CONTCAR) involved in this work:**

|                    |                    |                    |   |   |   |
|--------------------|--------------------|--------------------|---|---|---|
| 0.6032436003967304 | 0.4443136964907070 | 0.8028907843755709 | T | T | T |
| 0.7299428106397542 | 0.4770938689624190 | 0.7713784248669722 | T | T | T |
| 0.8603099598394294 | 0.6770366538589362 | 0.7530946952106184 | T | T | T |
| 0.8111379058433934 | 0.6460987251475712 | 0.5606595597017240 | T | T | T |
| 0.6905103499098395 | 0.6468474803287558 | 0.4766988214391631 | T | T | T |
| 0.5867972346643010 | 0.6685519435813908 | 0.5975114925594746 | T | T | T |
| 0.5954607802575677 | 0.6611519887859379 | 0.7940210020870221 | T | T | T |
| 0.7213342892505152 | 0.6416000208667453 | 0.7394875265285408 | T | T | T |
| 0.8293070573799664 | 0.5462571850132468 | 0.6857962424915054 | T | T | T |
| 0.5811818170037679 | 0.5494540057619767 | 0.6841662705619285 | T | T | T |
| 0.9287581530839759 | 0.3767501524783957 | 0.9258573957017497 | T | T | T |
| 0.9082886734315228 | 0.5076601259713220 | 0.9300347989759407 | T | T | T |
| 0.8987328127903648 | 0.6403456720008130 | 0.9367364410138380 | T | T | T |
| 0.6973327538961110 | 0.3732305485222745 | 0.8882963867952158 | T | T | T |
| 0.6753961782829899 | 0.5005063287492180 | 0.9466728173332245 | T | T | T |
| 0.6844647078984663 | 0.6355362235905629 | 0.9337627225646142 | T | T | T |
| 0.4894486054017800 | 0.4526431926975651 | 0.7084631390494645 | T | T | T |
| 0.4804116574859709 | 0.6340407489834509 | 0.7056419111601253 | T | T | T |
| 0.6436823309289843 | 0.9394573503320636 | 0.2882997269302586 | T | T | T |
| 0.6995917732092235 | 0.9298791204067709 | 0.1101695729754832 | T | T | T |
| 0.8005592801955476 | 0.9439036042849093 | 0.9804164229661435 | T | T | T |
| 0.8998027583180892 | 0.9274329692031142 | 0.1118311175027840 | T | T | T |
| 0.8976458485635824 | 0.9482211355929747 | 0.3091142900678605 | T | T | T |
| 0.7715389493965640 | 0.9684657234580151 | 0.2654722284346748 | T | T | T |
| 0.6423474195338450 | 0.1705696222043896 | 0.2559358386383680 | T | T | T |
| 0.6961273189641016 | 0.1588929499640131 | 0.0799152014791931 | T | T | T |
| 0.8098633471071160 | 0.1473664593201947 | 0.9818862700456180 | T | T | T |
| 0.9141233701389730 | 0.1692654239135821 | 0.0999973630532069 | T | T | T |
| 0.8971374857173676 | 0.1545659930739018 | 0.2963569474817051 | T | T | T |
| 0.7716283760276126 | 0.1394461310307180 | 0.2418311243553318 | T | T | T |
| 0.6790867429928871 | 0.0502163201595704 | 0.1918455077553482 | T | T | T |
| 0.9197727586566145 | 0.0485374929209350 | 0.1801704379244771 | T | T | T |
| 0.5692224913599345 | 0.8758072562404879 | 0.4208764497042149 | T | T | T |
| 0.5823009182320126 | 0.0072647238555902 | 0.4369949583438859 | T | T | T |
| 0.5992065800090079 | 0.1390725921094622 | 0.4377609986326063 | T | T | T |
| 0.8077736702187598 | 0.8709958473972674 | 0.3934793423292410 | T | T | T |
| 0.8169695944190601 | 0.9986833824418638 | 0.4473015385328802 | T | T | T |
| 0.8053723014788127 | 0.1325486708283849 | 0.4355181768037060 | T | T | T |
| 0.0111726071337972 | 0.9536519398942643 | 0.2168781540544746 | T | T | T |
| 0.0163157262497853 | 0.1368048392209639 | 0.2162899246218064 | T | T | T |
| 0.8569959412747005 | 0.0564618939685185 | 0.7873339271435523 | T | T | T |
| 0.8016239206376183 | 0.0713103370528675 | 0.6098599586100363 | T | T | T |
| 0.7006323740693303 | 0.0566146541708479 | 0.4804290857679144 | T | T | T |
| 0.5996204351706168 | 0.0742818391771156 | 0.6080300243249858 | T | T | T |
| 0.6037679841158584 | 0.0507627329624955 | 0.8051414743378934 | T | T | T |
| 0.7292850113775634 | 0.0272626286261042 | 0.7621250882690193 | T | T | T |
| 0.8587006565082205 | 0.8323562672349740 | 0.7632657437367469 | T | T | T |
| 0.8051169090116295 | 0.8335018271444101 | 0.5856938222981397 | T | T | T |
| 0.6922952361426864 | 0.8521045207678093 | 0.4856494896157360 | T | T | T |
| 0.5889161310980980 | 0.8281288156205798 | 0.6046996981422829 | T | T | T |
| 0.6033823459741631 | 0.8505801266525936 | 0.7991721501563818 | T | T | T |
| 0.7295344977284440 | 0.8603936379163576 | 0.7445383668333494 | T | T | T |
| 0.8209920025357046 | 0.9482685359845054 | 0.6833607475960519 | T | T | T |

**Structure files (CONTCAR) involved in this work:**

|                    |                    |                    |   |   |   |
|--------------------|--------------------|--------------------|---|---|---|
| 0.5800916556074136 | 0.9520349437275035 | 0.6738271539561752 | T | T | T |
| 0.9320467644352707 | 0.1263864252887634 | 0.9127341343249935 | T | T | T |
| 0.9185585505374273 | 0.9958818918575348 | 0.9420765216189282 | T | T | T |
| 0.9044732856069796 | 0.8633555262577934 | 0.9426491882883141 | T | T | T |
| 0.6957972094177226 | 0.1273116909115781 | 0.8862960525864532 | T | T | T |
| 0.6836526207501306 | 0.0003395265791689 | 0.9449048152278287 | T | T | T |
| 0.6966043254334642 | 0.8662353288559733 | 0.9382368861389103 | T | T | T |
| 0.4895009872560783 | 0.0469837983529123 | 0.7152201995380763 | T | T | T |
| 0.4845127367214234 | 0.8638511865508963 | 0.7153664786075873 | T | T | T |
| 0.3581967914460819 | 0.4322367098178943 | 0.7103124460461762 | T | T | T |
| 0.3102143505754482 | 0.4387926165397842 | 0.8929209754741054 | T | T | T |
| 0.2008215582392715 | 0.4546836444948924 | 0.0056240561376379 | T | T | T |
| 0.0930669768241145 | 0.4285040361206324 | 0.8960473302252613 | T | T | T |
| 0.1006893390146195 | 0.4379670870288420 | 0.6996288219557076 | T | T | T |
| 0.2282606166845385 | 0.4587662773375015 | 0.7428176794547996 | T | T | T |
| 0.3567482057677315 | 0.6746756252184966 | 0.7423279264429042 | T | T | T |
| 0.3010991062026379 | 0.6444553425397190 | 0.9131438293193059 | T | T | T |
| 0.1892605463041787 | 0.6473774055558037 | 0.0182783910399664 | T | T | T |
| 0.0909053429989771 | 0.6698581286745360 | 0.8898412707045844 | T | T | T |
| 0.1010751893297733 | 0.6552433015313688 | 0.6954097546142458 | T | T | T |
| 0.2273277113438948 | 0.6437928783237278 | 0.7492471097271235 | T | T | T |
| 0.3208901435499564 | 0.5498852341290758 | 0.7785795060207111 | T | T | T |
| 0.0814947919341262 | 0.5476062267693870 | 0.8105473718878508 | T | T | T |
| 0.4337869561104653 | 0.3764111401272563 | 0.5705860738884121 | T | T | T |
| 0.4155168299809388 | 0.5079218757488474 | 0.5673271439659564 | T | T | T |
| 0.3896482447627488 | 0.6386095626202253 | 0.5584935352009863 | T | T | T |
| 0.1941769980505389 | 0.3649523295119259 | 0.6122288926877728 | T | T | T |
| 0.1785939520333522 | 0.4949553783856451 | 0.5657544990856509 | T | T | T |
| 0.1923665298137340 | 0.6289436508309192 | 0.5575999630688213 | T | T | T |
| 0.9847026117056056 | 0.4552971570812553 | 0.7887374083165246 | T | T | T |
| 0.9838046957109667 | 0.6352378517841919 | 0.7828090712559074 | T | T | T |
| 0.1336472062851836 | 0.5667925554006943 | 0.2172281678795290 | T | T | T |
| 0.1887796068784350 | 0.5576466800980927 | 0.3943378998984308 | T | T | T |
| 0.2946197839101981 | 0.5480509894856752 | 0.5167720699603088 | T | T | T |
| 0.3966675308902893 | 0.5696342117064456 | 0.3936639916544578 | T | T | T |
| 0.3938045558792034 | 0.5587694835702428 | 0.1973176611595915 | T | T | T |
| 0.2651996848033245 | 0.5436502220602389 | 0.2367153954946015 | T | T | T |
| 0.1408824408786083 | 0.3239149534358571 | 0.2473765910741895 | T | T | T |
| 0.1952218235777693 | 0.3580836207720349 | 0.4172883580034387 | T | T | T |
| 0.3097166885958290 | 0.3534045593080872 | 0.5141756035626077 | T | T | T |
| 0.4094685629435953 | 0.3283516737189576 | 0.3877702148350282 | T | T | T |
| 0.3946496209692739 | 0.3449344986354930 | 0.1920834874529642 | T | T | T |
| 0.2703650145984764 | 0.3534973436623102 | 0.2541180061902181 | T | T | T |
| 0.1769968431022700 | 0.4489871559336027 | 0.2760889331651458 | T | T | T |
| 0.4130150565512146 | 0.4503335642030520 | 0.3116694590671206 | T | T | T |
| 0.0643946014679285 | 0.6248922546326933 | 0.0724249222258858 | T | T | T |
| 0.0814255860944769 | 0.4925054476394813 | 0.0686991785568098 | T | T | T |
| 0.1121389068860472 | 0.3624120105657475 | 0.0617795867991443 | T | T | T |
| 0.3062992261914383 | 0.6361281046680846 | 0.1082685466312995 | T | T | T |
| 0.3158192816882186 | 0.5053681429412548 | 0.0614891617763085 | T | T | T |
| 0.2980738555415795 | 0.3713619652225794 | 0.0605643244937033 | T | T | T |
| 0.5072296006950351 | 0.5435755477379409 | 0.2877979018000966 | T | T | T |
| 0.5126952659673782 | 0.3642286653768944 | 0.2740189764509182 | T | T | T |

**Structure files (CONTCAR) involved in this work:**

|                    |                    |                    |   |   |   |
|--------------------|--------------------|--------------------|---|---|---|
| 0.4369582167961041 | 0.7510610843625072 | 0.6355389997996022 | T | T | T |
| 0.1890710837069327 | 0.7487650743974736 | 0.6376329210490194 | T | T | T |
| 0.2741021865774668 | 0.7510099340524622 | 0.0242310640866260 | T | T | T |
| 0.1055687869586860 | 0.7495462403210634 | 0.0466178292636911 | T | T | T |
| 0.0620571656041538 | 0.2498603544379958 | 0.1357511968025083 | T | T | T |
| 0.3076096317960059 | 0.2505790485120167 | 0.1376891882260400 | T | T | T |
| 0.2249498904524773 | 0.2503644620892279 | 0.5259553562500832 | T | T | T |
| 0.3932283238685066 | 0.2512909292491119 | 0.5457996258606752 | T | T | T |
| 0.5578137440932356 | 0.2498180208108010 | 0.3523128402286413 | T | T | T |
| 0.8086978533671639 | 0.2490320821317860 | 0.3438042410259033 | T | T | T |
| 0.7265445615541515 | 0.2490923951666739 | 0.9398098583347660 | T | T | T |
| 0.8919267744824312 | 0.2502456809670434 | 0.9475287462799441 | T | T | T |
| 0.9446371703548883 | 0.7519809919861490 | 0.8583075955857766 | T | T | T |
| 0.6882210951242405 | 0.7515338275599610 | 0.8434928554833742 | T | T | T |
| 0.7733769828269319 | 0.7491082880370507 | 0.4414076303383644 | T | T | T |
| 0.6088232280885871 | 0.7509450770444203 | 0.4469884545687155 | T | T | T |
| 0.9428548378246466 | 0.4710834305266416 | 0.5159326714533176 | T | T | T |
| 0.8175057004268584 | 0.3326188269351741 | 0.3225737773335593 | T | T | T |
| 0.8000952256550437 | 0.6329824497919143 | 0.6902538737046103 | T | T | T |
| 0.9195566538465511 | 0.4110262192772181 | 0.4223698012717671 | T | T | T |
| 0.8872324603116513 | 0.5507311354774923 | 0.5623092033569662 | T | T | T |
| 1.0084193269582951 | 0.6153713161008416 | 0.4179899740502506 | T | T | T |
| 0.9823171802509126 | 0.5984192753845049 | 0.5226691958421564 | T | T | T |
| 0.0248640733990442 | 0.5698981211112580 | 0.3788085152312945 | T | T | T |
| 0.0512766690368440 | 0.6498621297563308 | 0.4215497625495011 | T | T | T |
| 0.9697975399632193 | 0.6388319228955983 | 0.3712856072718235 | T | T | T |
| 0.9549428145602866 | 0.6423879772847998 | 0.5532126718583625 | T | T | T |
| 0.9683202203410881 | 0.5322997130157242 | 0.5101887222506621 | T | T | T |
| 0.0228898277368170 | 0.5903460506594709 | 0.5765558432615777 | T | T | T |

**Figure S15(b) Zn-C<sub>2</sub>H<sub>5</sub>+O<sub>M</sub>-H**

Si O Al Zn C H

1.0000000000000000

20.0219999999999985 0.0000000000000000 0.0000000000000000

0.0000000000000000 19.8990000000000009 0.0000000000000000

0.0000000000000000 0.0000000000000000 13.3829999999999991

94 193 2 2 2 6

Selective dynamics

Direct

|                    |                    |                    |   |   |   |
|--------------------|--------------------|--------------------|---|---|---|
| 0.4231408149805674 | 0.0603933603982790 | 0.6487367953972639 | T | T | T |
| 0.3050717134725821 | 0.0310710083795759 | 0.7913688041600396 | T | T | T |
| 0.2827371717450503 | 0.0575743371432121 | 0.0165794200854368 | T | T | T |
| 0.1225751190868731 | 0.0647847765534900 | 0.0124064562069606 | T | T | T |
| 0.0676932696891459 | 0.0306272976584290 | 0.8008396227974269 | T | T | T |
| 0.1802216768562542 | 0.0639954625032094 | 0.6642175558871842 | T | T | T |
| 0.4193139664719366 | 0.8278301604115706 | 0.6683200937361025 | T | T | T |
| 0.3015054048933147 | 0.8722178071393210 | 0.8010498380835134 | T | T | T |
| 0.2670102218452679 | 0.8318941653227452 | 0.0198198820523240 | T | T | T |
| 0.1119004797980161 | 0.8273710416692459 | 0.0114573414689045 | T | T | T |
| 0.0655981966615142 | 0.8734683981086782 | 0.7976144085478167 | T | T | T |
| 0.1800955017711271 | 0.8279117291304822 | 0.6662422111653487 | T | T | T |
| 0.0763651121580136 | 0.9415996749637494 | 0.1486960245745032 | T | T | T |
| 0.1944671337225725 | 0.9697104415002213 | 0.2919976906356582 | T | T | T |
| 0.2174477551571035 | 0.9427454023524443 | 0.5166407023981310 | T | T | T |



**Structure files (CONTCAR) involved in this work:**

|                    |                    |                    |   |   |   |
|--------------------|--------------------|--------------------|---|---|---|
| 0.3777187433479685 | 0.9367605043687461 | 0.5127257486384548 | T | T | T |
| 0.4330170906792760 | 0.9694849656323099 | 0.3002232051120312 | T | T | T |
| 0.3194952575645156 | 0.9366146487504258 | 0.1646351535508844 | T | T | T |
| 0.0807115591821710 | 0.1729374829528810 | 0.1670269970423960 | T | T | T |
| 0.1980235342865305 | 0.1289641785393319 | 0.3014662966709264 | T | T | T |
| 0.2324489596654487 | 0.1700634134472502 | 0.5202211486480771 | T | T | T |
| 0.3877410325191527 | 0.1741635325527631 | 0.5106660181006304 | T | T | T |
| 0.4352479404013840 | 0.1275251040273613 | 0.2965413497303305 | T | T | T |
| 0.3194951665862624 | 0.1726641284612944 | 0.1660073193057928 | T | T | T |
| 0.5736713179252396 | 0.5568883952707173 | 0.3562157360342792 | T | T | T |
| 0.6912283389133295 | 0.5269324060605755 | 0.2084553847431198 | T | T | T |
| 0.7142875469274718 | 0.5687401542739657 | 0.9904861346839647 | T | T | T |
| 0.8741846454382557 | 0.5727955374000500 | 0.9898284711772011 | T | T | T |
| 0.9267714380763311 | 0.5299220370375833 | 0.1963097069376230 | T | T | T |
| 0.8145089465884527 | 0.5527694948493092 | 0.3472096983426006 | T | T | T |
| 0.5754116666328808 | 0.3277286705616796 | 0.3282810949979699 | T | T | T |
| 0.6922547981277923 | 0.3724621549364013 | 0.1852462978767501 | T | T | T |
| 0.7299920552486338 | 0.3285413205727427 | 0.9718287871862998 | T | T | T |
| 0.8852942360947083 | 0.3261553485974292 | 0.9908504153677197 | T | T | T |
| 0.9404444438920576 | 0.3746367223969294 | 0.1921953761041733 | T | T | T |
| 0.9197417752876471 | 0.4460509299713437 | 0.8587829945375473 | T | T | T |
| 0.8035526555259060 | 0.4728504340073085 | 0.7109340952946429 | T | T | T |
| 0.7753922428365343 | 0.4383183781099994 | 0.4921071591471786 | T | T | T |
| 0.6170654818523019 | 0.4315448325362414 | 0.4871363008948606 | T | T | T |
| 0.5698093317980520 | 0.4703129931370290 | 0.6986895617576064 | T | T | T |
| 0.6804477791047671 | 0.4502420118775531 | 0.8503561454687013 | T | T | T |
| 0.9220741113573658 | 0.6754483337701660 | 0.8366754221406519 | T | T | T |
| 0.7671111932345835 | 0.6724382067850926 | 0.4652881505198038 | T | T | T |
| 0.6125485372109899 | 0.6745766060742391 | 0.4834245878372058 | T | T | T |
| 0.5622227966581160 | 0.6282833237413240 | 0.6943262968370628 | T | T | T |
| 0.6747995187633536 | 0.6696310404041955 | 0.8274284679399022 | T | T | T |
| 0.5770365242014299 | 0.9463651646317499 | 0.3568329878722667 | T | T | T |
| 0.6972305171220159 | 0.9727986660401059 | 0.2114747064466790 | T | T | T |
| 0.7190533111058767 | 0.9339818086119424 | 0.9925458619540785 | T | T | T |
| 0.8788405387609568 | 0.9328181147017367 | 0.9929093509078148 | T | T | T |
| 0.9311249631052857 | 0.9695955927457293 | 0.2018935973006299 | T | T | T |
| 0.8210950012000618 | 0.9480788370060510 | 0.3516286662695693 | T | T | T |
| 0.5785479695219011 | 0.1725909118281833 | 0.3314052890513204 | T | T | T |
| 0.6973609862950073 | 0.1292750304291018 | 0.1921095498937087 | T | T | T |
| 0.7318836755929728 | 0.1720078530270531 | 0.9728223560102572 | T | T | T |
| 0.8873435352618985 | 0.1734482011670447 | 0.9843614089869435 | T | T | T |
| 0.9357299370267756 | 0.1270213763926230 | 0.1967073571352041 | T | T | T |
| 0.8191284542496565 | 0.1692931526493740 | 0.3288610367260704 | T | T | T |
| 0.9227323595984348 | 0.0537313751420539 | 0.8559615460689646 | T | T | T |
| 0.8017942179371147 | 0.0247228357540293 | 0.7101360808619647 | T | T | T |
| 0.7804707067282998 | 0.0657095344793250 | 0.4921508615306062 | T | T | T |
| 0.6204417505695415 | 0.0694978407702575 | 0.4911781452051071 | T | T | T |
| 0.5683006825913840 | 0.0310052594373835 | 0.7006206100791517 | T | T | T |
| 0.6784124730236183 | 0.0511530789898534 | 0.8513249044156066 | T | T | T |
| 0.9226262852460978 | 0.8288639666337285 | 0.8334038071854235 | T | T | T |
| 0.8031063632678684 | 0.8674043329912581 | 0.6912098386642638 | T | T | T |
| 0.7669082936772513 | 0.8277062925439627 | 0.4727648758424483 | T | T | T |
| 0.6126254259343096 | 0.8278772572541435 | 0.4878248813009528 | T | T | T |

**Structure files (CONTCAR) involved in this work:**

|                    |                    |                    |   |   |   |
|--------------------|--------------------|--------------------|---|---|---|
| 0.5641349597416242 | 0.8734692985308258 | 0.6987332509399455 | T | T | T |
| 0.6804340400178273 | 0.8294094805522867 | 0.8303041134111280 | T | T | T |
| 0.4242185629981400 | 0.4430152569493114 | 0.6419828359801256 | T | T | T |
| 0.3051837124935625 | 0.4700139225455649 | 0.7839648192649603 | T | T | T |
| 0.2803167693024851 | 0.4431173650853517 | 0.0085329759514362 | T | T | T |
| 0.1217537390994074 | 0.4363205374579628 | 0.0120111454938571 | T | T | T |
| 0.0660200409794425 | 0.4697464134909879 | 0.8020025307491502 | T | T | T |
| 0.1765118799494813 | 0.4397443306376539 | 0.6566828008776258 | T | T | T |
| 0.4171295859387373 | 0.6743310894720371 | 0.6622670848714058 | T | T | T |
| 0.3021526458374525 | 0.6280423923065627 | 0.7976630026572967 | T | T | T |
| 0.2675484761857878 | 0.6707099975154334 | 0.0185180909759348 | T | T | T |
| 0.1133340191065796 | 0.6735684993096264 | 0.0117811043568806 | T | T | T |
| 0.0662661315086680 | 0.6277938886667531 | 0.7998273731704005 | T | T | T |
| 0.1789270201279365 | 0.6704077049586822 | 0.6623702807558770 | T | T | T |
| 0.0721461424848025 | 0.5586012603593015 | 0.1452682993117960 | T | T | T |
| 0.1930444395007288 | 0.5293481444472744 | 0.2834532543600680 | T | T | T |
| 0.2142048236003360 | 0.5579439021015319 | 0.5113524058861544 | T | T | T |
| 0.3737139030707458 | 0.5660578877990290 | 0.5117059767427026 | T | T | T |
| 0.4282574637808482 | 0.5302098441035535 | 0.3005501739440765 | T | T | T |
| 0.3205264776165618 | 0.5614576635233112 | 0.1523366328932562 | T | T | T |
| 0.0841978069821758 | 0.3259018010115101 | 0.1639280050830558 | T | T | T |
| 0.1973278724641132 | 0.3712285179237501 | 0.3008277260942613 | T | T | T |
| 0.2315274543893371 | 0.3312179157785859 | 0.5195790366280519 | T | T | T |
| 0.3863566000054016 | 0.3280231271087688 | 0.5052782349819983 | T | T | T |
| 0.4324120152969054 | 0.3725750139678103 | 0.2926051650605515 | T | T | T |
| 0.3170590432569463 | 0.3300951641691064 | 0.1627336165601996 | T | T | T |
| 0.3591458728545105 | 0.0697745076840528 | 0.7219700319128254 | T | T | T |
| 0.3162741362649533 | 0.0532686686901103 | 0.9065164951583136 | T | T | T |
| 0.2022458521126819 | 0.0514842735740965 | 0.0087406546336605 | T | T | T |
| 0.0926078234468516 | 0.0695003166439088 | 0.9005703276392772 | T | T | T |
| 0.1036058579111220 | 0.0636270017333511 | 0.7036572344460035 | T | T | T |
| 0.2295535942785659 | 0.0515184332086293 | 0.7590671376465855 | T | T | T |
| 0.3599256013373889 | 0.8273210140786765 | 0.7508972149582347 | T | T | T |
| 0.3031218494375069 | 0.8614673622205188 | 0.9207160021522193 | T | T | T |
| 0.1887488512817622 | 0.8537710523700947 | 0.0186968824475179 | T | T | T |
| 0.0870996448613474 | 0.8314774705895680 | 0.8965534406427476 | T | T | T |
| 0.1031375848999179 | 0.8411087215667408 | 0.7007828371132340 | T | T | T |
| 0.2288412690426941 | 0.8491336178288921 | 0.7586803354284166 | T | T | T |
| 0.3154110769106662 | 0.9507037753049958 | 0.7750020542071178 | T | T | T |
| 0.0879842380822246 | 0.9515915889393638 | 0.8102168312893591 | T | T | T |
| 0.4335724650765333 | 0.1290551263530632 | 0.5846388475406400 | T | T | T |
| 0.4129097637374675 | 0.9984542721733858 | 0.5715206659773026 | T | T | T |
| 0.3943422676359087 | 0.8664440335891365 | 0.5682938814760827 | T | T | T |
| 0.1957147899263293 | 0.1372117215234172 | 0.6161899126176087 | T | T | T |
| 0.1894234210141781 | 0.0051012189996809 | 0.5819211221449463 | T | T | T |
| 0.1972287682595985 | 0.8714030359520736 | 0.5670130423269674 | T | T | T |
| 0.9877488850184289 | 0.0397173632822118 | 0.7865733080294129 | T | T | T |
| 0.9852343902575043 | 0.8689763324126498 | 0.7824992671061082 | T | T | T |
| 0.1403514494583537 | 0.9316626500525110 | 0.2218039557892724 | T | T | T |
| 0.1834743143089708 | 0.9465134137202929 | 0.4067595022691932 | T | T | T |
| 0.2978405913794346 | 0.9492355558031960 | 0.5083076851437874 | T | T | T |
| 0.4076989365410113 | 0.9320444121575291 | 0.4009030946130299 | T | T | T |
| 0.3960322140222544 | 0.9366814176258481 | 0.2039789007282838 | T | T | T |

**Structure files (CONTCAR) involved in this work:**

|                    |                    |                    |   |   |   |
|--------------------|--------------------|--------------------|---|---|---|
| 0.2699563155418139 | 0.9497714943125266 | 0.2591086144026544 | T | T | T |
| 0.1397521722915014 | 0.1734808694048836 | 0.2499514198956503 | T | T | T |
| 0.1957436826334938 | 0.1423541063896357 | 0.4204857009739602 | T | T | T |
| 0.3106434156240865 | 0.1481117750291175 | 0.5173039203196860 | T | T | T |
| 0.4138544701964953 | 0.1682592927101518 | 0.3966242965911667 | T | T | T |
| 0.3964837811999108 | 0.1605674738212186 | 0.2012134863491533 | T | T | T |
| 0.2708126821226058 | 0.1508463224012354 | 0.2583385353434991 | T | T | T |
| 0.1837038952445876 | 0.0502722554630239 | 0.2779576728451966 | T | T | T |
| 0.4143815905511202 | 0.0490368007982059 | 0.3078047100963696 | T | T | T |
| 0.0655461935343809 | 0.8736871615026344 | 0.0830667153939503 | T | T | T |
| 0.0865340498559225 | 0.0043541102840683 | 0.0728527268607341 | T | T | T |
| 0.1064765850170049 | 0.1359714017147459 | 0.0662799165057573 | T | T | T |
| 0.3037572321419638 | 0.8634596620626628 | 0.1167674740348616 | T | T | T |
| 0.3105968011910760 | 0.9954167197357535 | 0.0821304380085381 | T | T | T |
| 0.3032961885759758 | 0.1289327779228564 | 0.0666743643823393 | T | T | T |
| 0.5126627458699962 | 0.9584301548338703 | 0.2852596894821780 | T | T | T |
| 0.5155069359597104 | 0.1336090872188583 | 0.2800827829196337 | T | T | T |
| 0.6377938978693808 | 0.5614351424176878 | 0.2830707184914351 | T | T | T |
| 0.6977752225203557 | 0.5729123224536776 | 0.1091321016590293 | T | T | T |
| 0.7946130975969984 | 0.5661789707188444 | 0.9721420831977029 | T | T | T |
| 0.8903862190924143 | 0.5729807180325903 | 0.1095356978311712 | T | T | T |
| 0.8903593838528222 | 0.5394109148842645 | 0.3050359615314159 | T | T | T |
| 0.7635170623203222 | 0.5236970442091460 | 0.2645359322986029 | T | T | T |
| 0.6397362870306686 | 0.3319194219641760 | 0.2558379231058759 | T | T | T |
| 0.6872305211197174 | 0.3412070488160803 | 0.0729603214495656 | T | T | T |
| 0.8078338045663283 | 0.3501306626776445 | 0.9902003309155232 | T | T | T |
| 0.9121286586767293 | 0.3252722087232727 | 0.1065017402850731 | T | T | T |
| 0.9037469064436990 | 0.3564443963451223 | 0.3000318306924885 | T | T | T |
| 0.7668818598873233 | 0.3659279077294297 | 0.2285297215859215 | T | T | T |
| 0.6685911876922519 | 0.4510248113512157 | 0.1810632769945768 | T | T | T |
| 0.9223580671618264 | 0.4513462096709497 | 0.1634943785960712 | T | T | T |
| 0.5644962241479192 | 0.6278130867792612 | 0.4142785460602337 | T | T | T |
| 0.5816433064523996 | 0.4969902327861659 | 0.4383936751047074 | T | T | T |
| 0.5897741677947403 | 0.3632311813910280 | 0.4359036754936664 | T | T | T |
| 0.8023122356592405 | 0.6309183138492342 | 0.3727105403961751 | T | T | T |
| 0.8087070214246426 | 0.5094332343280548 | 0.4523825470548337 | T | T | T |
| 0.8158124920376254 | 0.3784356916808024 | 0.4341551772680476 | T | T | T |
| 0.0046198566046714 | 0.5505298379568880 | 0.2122045760980996 | T | T | T |
| 0.0200624869561894 | 0.3664367431450341 | 0.2096944235394012 | T | T | T |
| 0.8570677333311062 | 0.4350918676564035 | 0.7830020053892066 | T | T | T |
| 0.7917326982954794 | 0.4287492651732392 | 0.6096079728779943 | T | T | T |
| 0.6972148791023487 | 0.4363736523232083 | 0.4657095753170223 | T | T | T |
| 0.6029807158674853 | 0.4285328743316601 | 0.6061085657349157 | T | T | T |
| 0.6060245671263863 | 0.4483872407577394 | 0.8021842443362071 | T | T | T |
| 0.7325606478707837 | 0.4800051019723116 | 0.7674941364602399 | T | T | T |
| 0.8608392084252215 | 0.6721826572375466 | 0.7618586792318748 | T | T | T |
| 0.8058601527306666 | 0.6583914760141685 | 0.5673354496677252 | T | T | T |
| 0.6890850946899485 | 0.6478056663995180 | 0.4730522886450961 | T | T | T |
| 0.5877577479900020 | 0.6708907738195646 | 0.5983774272362693 | T | T | T |
| 0.5965310930930895 | 0.6584427379786538 | 0.7945173983258398 | T | T | T |
| 0.7230415758113599 | 0.6373034956385858 | 0.7445725066720258 | T | T | T |
| 0.8327526722598482 | 0.5464153831337533 | 0.6769130534743814 | T | T | T |
| 0.5812349644590028 | 0.5496570755397108 | 0.6775289373068477 | T | T | T |

**Structure files (CONTCAR) involved in this work:**

|                    |                     |                    |   |   |   |
|--------------------|---------------------|--------------------|---|---|---|
| 0.9299162841946697 | 0.3778367274045395  | 0.9244239099142726 | T | T | T |
| 0.9093950045161988 | 0.5087076280914059  | 0.9348991906530056 | T | T | T |
| 0.9043344529408066 | 0.6419779283793634  | 0.9455150909369194 | T | T | T |
| 0.7005867913737995 | 0.3739237267135925  | 0.8811190325722948 | T | T | T |
| 0.6817391999635217 | 0.4992491231421358  | 0.9473727675055478 | T | T | T |
| 0.6835375484667608 | 0.6345512809912719  | 0.9372408888624071 | T | T | T |
| 0.4908242976440251 | 0.4525095894415807  | 0.7095570867642336 | T | T | T |
| 0.4814830346584995 | 0.6342348407336688  | 0.7054396797077161 | T | T | T |
| 0.6431614956423150 | 0.9407583819727581  | 0.2877605891639634 | T | T | T |
| 0.6983273733044723 | 0.9284091982847781  | 0.1095977869858585 | T | T | T |
| 0.7991868974442278 | 0.9451773645965834  | 0.9807025185532179 | T | T | T |
| 0.8994715835596797 | 0.9266586769545474  | 0.1098259835877133 | T | T | T |
| 0.8964243237039711 | 0.9487747516917527  | 0.3067932596528857 | T | T | T |
| 0.7706119878032768 | 0.9711769907131933  | 0.2628204345482087 | T | T | T |
| 0.6418671543422829 | 0.1695172296220582  | 0.2565615811529843 | T | T | T |
| 0.6968717589979592 | 0.1615011829346231  | 0.0809043566433306 | T | T | T |
| 0.8098683399449912 | 0.1490484025490154  | 0.9803706713037040 | T | T | T |
| 0.9141286976394369 | 0.1696989680447346  | 0.0984308605724641 | T | T | T |
| 0.8963492920667271 | 0.1541754246080983  | 0.2947044754431941 | T | T | T |
| 0.7706556007179794 | 0.1367959323042552  | 0.2428913084540687 | T | T | T |
| 0.6773754563383985 | 0.0501869153941199  | 0.1862243201512846 | T | T | T |
| 0.9187138549259033 | 0.0485577032030979  | 0.1772420218223577 | T | T | T |
| 0.5670698846678776 | 0.8767205052823623  | 0.4185411195574968 | T | T | T |
| 0.5816425448706352 | 0.0078205988206330  | 0.4367325974971698 | T | T | T |
| 0.5982079085261033 | 0.1396467969029133  | 0.4386961117037603 | T | T | T |
| 0.8048877104417326 | 0.8727175692646750  | 0.3895943481783994 | T | T | T |
| 0.8166422382512296 | 0.9997410969710042  | 0.4452644496633125 | T | T | T |
| 0.8055872673312767 | 0.1333589093636247  | 0.4364393187182504 | T | T | T |
| 0.0102468612246046 | 0.9543415296010359  | 0.2155887756201806 | T | T | T |
| 0.0156023793132331 | 0.1365068758292620  | 0.2150659859713991 | T | T | T |
| 0.8572042686377621 | 0.0555261092458744  | 0.7854315924469112 | T | T | T |
| 0.8002642185699724 | 0.0706034305440024  | 0.6096876137906295 | T | T | T |
| 0.7000993730787554 | 0.0574127401628421  | 0.4788559747593752 | T | T | T |
| 0.5997295133542442 | 0.0739257561298509  | 0.6082246238413855 | T | T | T |
| 0.6034687541128984 | 0.0517189523391056  | 0.8052970253233600 | T | T | T |
| 0.7291734292028312 | 0.0268592956268276  | 0.7637257071206175 | T | T | T |
| 0.8605718454145890 | 0.8307148457485173  | 0.7561609141440101 | T | T | T |
| 0.8034570061433056 | 0.8340060503950938  | 0.5807637937769791 | T | T | T |
| 0.6898865085720953 | 0.8535383240248536  | 0.4836860482189002 | T | T | T |
| 0.5868308467528073 | 0.8291905947208796  | 0.6027070386323203 | T | T | T |
| 0.6042486445908422 | 0.8487427010128443  | 0.7976582850169791 | T | T | T |
| 0.7305082978212442 | 0.8571707756290057  | 0.7433980639533605 | T | T | T |
| 0.8195704567833766 | 0.9473252594415275  | 0.6823638428940573 | T | T | T |
| 0.5800875849199956 | 0.9519586145774023  | 0.6759135775968852 | T | T | T |
| 0.9316186013557062 | 0.1263093559206037  | 0.9108645373887813 | T | T | T |
| 0.9176765996436733 | 0.9959205073932912  | 0.9416650145746847 | T | T | T |
| 0.9010180659185857 | 0.8635645456307980  | 0.9385719462807873 | T | T | T |
| 0.6954569917287677 | 0.1268619699644192  | 0.8883125698687288 | T | T | T |
| 0.6814305062650525 | -0.0009478248595151 | 0.9447516502009699 | T | T | T |
| 0.6971828795346127 | 0.8650223497095431  | 0.9368919799917388 | T | T | T |
| 0.4893679054381709 | 0.0470790924805277  | 0.7151684999200467 | T | T | T |
| 0.4844062396635701 | 0.8637731051391808  | 0.7175161984911247 | T | T | T |
| 0.3594828089185331 | 0.4320453835390599  | 0.7138139764003150 | T | T | T |

**Structure files (CONTCAR) involved in this work:**

|                    |                    |                    |   |   |   |
|--------------------|--------------------|--------------------|---|---|---|
| 0.3091798842352941 | 0.4386878348976394 | 0.8956120188988795 | T | T | T |
| 0.2001317944178894 | 0.4566457255898632 | 0.0094462876019619 | T | T | T |
| 0.0929174260228730 | 0.4296776072997557 | 0.8995248826564313 | T | T | T |
| 0.1009587318727553 | 0.4386459965204761 | 0.7021178480715817 | T | T | T |
| 0.2292244210733567 | 0.4593266693961587 | 0.7439611899530656 | T | T | T |
| 0.3588153239398418 | 0.6745232899565687 | 0.7466189623307117 | T | T | T |
| 0.3001236381833019 | 0.6439792862660378 | 0.9155789143988683 | T | T | T |
| 0.1897720302689765 | 0.6471402265549808 | 0.0251159940530651 | T | T | T |
| 0.0932038224497594 | 0.6701605098103948 | 0.8949855633828347 | T | T | T |
| 0.1028073255679263 | 0.6578334988582873 | 0.7007076511993977 | T | T | T |
| 0.2293925867523733 | 0.6435806459772470 | 0.7490684453842111 | T | T | T |
| 0.3222800239772649 | 0.5497300195705531 | 0.7816222737333326 | T | T | T |
| 0.0854560317901362 | 0.5486849393636076 | 0.8129034734759262 | T | T | T |
| 0.4336799151346046 | 0.3768622758626203 | 0.5717878622841734 | T | T | T |
| 0.4154596238279616 | 0.5082465060376443 | 0.5700973535200666 | T | T | T |
| 0.3890079640771342 | 0.6389329041483349 | 0.5609074244868180 | T | T | T |
| 0.1938542276620462 | 0.3652731934343989 | 0.6143206712496015 | T | T | T |
| 0.1779778577132753 | 0.4952327684342623 | 0.5675183627317413 | T | T | T |
| 0.1913380058919157 | 0.6291425661864616 | 0.5592758573795070 | T | T | T |
| 0.9858182281480127 | 0.4594164104588811 | 0.7905704061038523 | T | T | T |
| 0.9861531367773234 | 0.6346719185756742 | 0.7894381827257856 | T | T | T |
| 0.1358099047455154 | 0.5671889211591241 | 0.2189395628629365 | T | T | T |
| 0.1892314312755628 | 0.5573508495662152 | 0.3965080761395213 | T | T | T |
| 0.2945248304510358 | 0.5483417738616545 | 0.5197189141573713 | T | T | T |
| 0.3967624728506153 | 0.5694208234465673 | 0.3959423913645395 | T | T | T |
| 0.3949499856490236 | 0.5590067285911475 | 0.1989368301894669 | T | T | T |
| 0.2668612710292220 | 0.5439959595279928 | 0.2397351186278640 | T | T | T |
| 0.1415063367918068 | 0.3237779404939704 | 0.2490928310221546 | T | T | T |
| 0.1942968312305624 | 0.3582478286730494 | 0.4197237468085533 | T | T | T |
| 0.3094038410815482 | 0.3542419812523970 | 0.5156161278929191 | T | T | T |
| 0.4091613247965440 | 0.3286398432126643 | 0.3889856238434401 | T | T | T |
| 0.3943236040422560 | 0.3451999209460240 | 0.1930377095772866 | T | T | T |
| 0.2708795162108996 | 0.3527029303145706 | 0.2577946666829304 | T | T | T |
| 0.1782515010673060 | 0.4490190645197483 | 0.2776689914424381 | T | T | T |
| 0.4125651942019183 | 0.4504601465238430 | 0.3132975289365261 | T | T | T |
| 0.0643566451453535 | 0.6257558245995331 | 0.0774293733992577 | T | T | T |
| 0.0800375526458570 | 0.4932146551584031 | 0.0730562028983027 | T | T | T |
| 0.1117688814476997 | 0.3634249740100466 | 0.0645648548331648 | T | T | T |
| 0.3078276374492962 | 0.6369175480033755 | 0.1107711641332363 | T | T | T |
| 0.3159628176648450 | 0.5062689861773947 | 0.0632667317221452 | T | T | T |
| 0.2964040452203282 | 0.3724217527939561 | 0.0638984682970360 | T | T | T |
| 0.5077113488688780 | 0.5427800964304144 | 0.2897289709250884 | T | T | T |
| 0.5122042205257286 | 0.3646250876148892 | 0.2744400730219370 | T | T | T |
| 0.4370119383147191 | 0.7512598831512077 | 0.6364519412252754 | T | T | T |
| 0.1911128665719236 | 0.7492867082356031 | 0.6387276840460506 | T | T | T |
| 0.2739963636815234 | 0.7512233098734870 | 0.0252257239597710 | T | T | T |
| 0.1064948136276839 | 0.7503262223258516 | 0.0504987967005615 | T | T | T |
| 0.0624063614857319 | 0.2499426313897571 | 0.1364597890190166 | T | T | T |
| 0.3069546397962811 | 0.2510572270170467 | 0.1380288404641854 | T | T | T |
| 0.2251000724064350 | 0.2507425363842791 | 0.5283702833063422 | T | T | T |
| 0.3925607464801623 | 0.2518093912420654 | 0.5468855905364997 | T | T | T |
| 0.5576452144417300 | 0.2500097092737709 | 0.3513949075764913 | T | T | T |
| 0.8071201780020193 | 0.2481350408454893 | 0.3409721475504509 | T | T | T |

**Structure files (CONTCAR) involved in this work:**

|                    |                    |                    |   |   |   |
|--------------------|--------------------|--------------------|---|---|---|
| 0.7257179220365237 | 0.2501597128362453 | 0.9390088054256099 | T | T | T |
| 0.8936386661528131 | 0.2509227531514922 | 0.9461578785474153 | T | T | T |
| 0.9453606977236663 | 0.7525897234148280 | 0.8578770948102822 | T | T | T |
| 0.6885309456857774 | 0.7494551377451615 | 0.8438711378027820 | T | T | T |
| 0.7694184535777054 | 0.7510489644849462 | 0.4328620525935422 | T | T | T |
| 0.6062451966805305 | 0.7517744536256517 | 0.4453412661129192 | T | T | T |
| 0.9458388114691744 | 0.4584862420181603 | 0.5267146265416430 | T | T | T |
| 0.8157299685940843 | 0.3315355455817273 | 0.3197830211669719 | T | T | T |
| 0.8012076726315197 | 0.6327713117125769 | 0.6908881298111628 | T | T | T |
| 0.9139310330397183 | 0.4071734506599220 | 0.4235555261471850 | T | T | T |
| 0.9112288109360773 | 0.5589797356288105 | 0.5793252275358870 | T | T | T |
| 0.9789256816345635 | 0.6607194657442774 | 0.4465274310733595 | T | T | T |
| 0.9846809431111770 | 0.6200073915229687 | 0.5428714784013359 | T | T | T |
| 0.9754527458213978 | 0.6289592742315760 | 0.3796644719032790 | T | T | T |
| 0.0234548203151198 | 0.6929191829967786 | 0.4375535233308454 | T | T | T |
| 0.9351086252151067 | 0.6940274099895321 | 0.4476159406249038 | T | T | T |
| 0.9890901282307997 | 0.6538496931174841 | 0.6072406356826037 | T | T | T |
| 0.9944065945142923 | 0.4620470903683978 | 0.5294825251482499 | T | T | T |
| 0.0303320797497366 | 0.5889041361159563 | 0.5423443653636648 | T | T | T |

**Figure S15(b)TS5**

Si O Al Zn C H

|                     |                     |                     |   |   |   |
|---------------------|---------------------|---------------------|---|---|---|
| 1.0000000000000000  |                     |                     |   |   |   |
| 20.0219999999999985 | 0.0000000000000000  | 0.0000000000000000  |   |   |   |
| 0.0000000000000000  | 19.8990000000000009 | 0.0000000000000000  |   |   |   |
| 0.0000000000000000  | 0.0000000000000000  | 13.3829999999999991 |   |   |   |
| 94                  | 193                 | 2                   | 2 | 2 | 6 |

Selective dynamics

Direct

|                    |                    |                    |   |   |   |
|--------------------|--------------------|--------------------|---|---|---|
| 0.4231770363453946 | 0.0604309633075302 | 0.6487026271874569 | T | T | T |
| 0.3052671932981027 | 0.0308254357357830 | 0.7918298825526684 | T | T | T |
| 0.2824949060425946 | 0.0578083093030998 | 0.0166311300987037 | T | T | T |
| 0.1223767077410148 | 0.0652339395910904 | 0.0125014227098768 | T | T | T |
| 0.0679351244493169 | 0.0310633141372054 | 0.8003931939438648 | T | T | T |
| 0.1807092590495113 | 0.0642486631648793 | 0.6643528679365885 | T | T | T |
| 0.4190042881328384 | 0.8276737850025133 | 0.6675676097357645 | T | T | T |
| 0.3018956607764654 | 0.8718714319065005 | 0.8019299866765386 | T | T | T |
| 0.2673975830900039 | 0.8317822784044956 | 0.0201790789228299 | T | T | T |
| 0.1122230806130994 | 0.8275637137663566 | 0.0106099390957009 | T | T | T |
| 0.0659522957798265 | 0.8740819921547394 | 0.7969259231860001 | T | T | T |
| 0.1807746276146623 | 0.8278204608289854 | 0.6673655341468187 | T | T | T |
| 0.0764767148525815 | 0.9416126194249774 | 0.1487864628172814 | T | T | T |
| 0.1941269500532594 | 0.9693607883428057 | 0.2930850180004711 | T | T | T |
| 0.2179007512893849 | 0.9427155621667379 | 0.5172334198297118 | T | T | T |
| 0.3780340971787708 | 0.9370588695224282 | 0.5122277963112036 | T | T | T |
| 0.4324795607526751 | 0.9708101586517619 | 0.2999801735057268 | T | T | T |
| 0.3190188329445431 | 0.9368535879240890 | 0.1651101754004264 | T | T | T |
| 0.0802739690881633 | 0.1727032031014379 | 0.1672956255621653 | T | T | T |
| 0.1975105312474947 | 0.1286587864305781 | 0.3021526974220370 | T | T | T |
| 0.2326334602448207 | 0.1704627835365535 | 0.5203137977138230 | T | T | T |
| 0.3878009255674380 | 0.1746148946843833 | 0.5112802292492501 | T | T | T |
| 0.4344734453086960 | 0.1283002429512819 | 0.2969501359983951 | T | T | T |
| 0.3187567708005347 | 0.1727822834846186 | 0.1663691654195182 | T | T | T |
| 0.5733683228971845 | 0.5570644216297889 | 0.3539959308068958 | T | T | T |

**Structure files (CONTCAR) involved in this work:**

|                    |                    |                    |   |   |   |
|--------------------|--------------------|--------------------|---|---|---|
| 0.6914467709574993 | 0.5277139850562784 | 0.2089829173783502 | T | T | T |
| 0.7154717298470873 | 0.5698729139812154 | 0.9901403079491543 | T | T | T |
| 0.8745882608716806 | 0.5743098945200424 | 0.9879712423411893 | T | T | T |
| 0.9251934263427141 | 0.5314939850887350 | 0.1949254347914754 | T | T | T |
| 0.8142308443767309 | 0.5538432497280273 | 0.3496520811748569 | T | T | T |
| 0.5760296638810096 | 0.3279097295642739 | 0.3264242133632008 | T | T | T |
| 0.6930429187799082 | 0.3731119826006510 | 0.1847961610488106 | T | T | T |
| 0.7316729377268217 | 0.3301276989572129 | 0.9698262693733676 | T | T | T |
| 0.8871957350965618 | 0.3266060688948616 | 0.9919256567283566 | T | T | T |
| 0.9406584230411176 | 0.3761077857938316 | 0.1937440766492944 | T | T | T |
| 0.9212136322508885 | 0.4463595881990248 | 0.8606327927196025 | T | T | T |
| 0.8063062844547791 | 0.4737776135453004 | 0.7119856437074019 | T | T | T |
| 0.7772872265402355 | 0.4385838452413222 | 0.4938238787185421 | T | T | T |
| 0.6185705434254866 | 0.4319222672687087 | 0.4858282546666192 | T | T | T |
| 0.5708030797524870 | 0.4711640318414440 | 0.6972157872588410 | T | T | T |
| 0.6828056199411776 | 0.4521921532514688 | 0.8494363691418484 | T | T | T |
| 0.9238274092487871 | 0.6758638748322615 | 0.8343519595134161 | T | T | T |
| 0.7645500232141477 | 0.6736619489645806 | 0.4655921621362291 | T | T | T |
| 0.6108193491645565 | 0.6750023171255763 | 0.4804551253526277 | T | T | T |
| 0.5625785071498748 | 0.6287357986636269 | 0.6917084135171963 | T | T | T |
| 0.6746155058342400 | 0.6686171429925047 | 0.8285430486749956 | T | T | T |
| 0.5768158365555639 | 0.9478829311472684 | 0.3543798606769434 | T | T | T |
| 0.6969824365304836 | 0.9742807320590331 | 0.2070534390026242 | T | T | T |
| 0.7186688868664476 | 0.9339910535884983 | 0.9900615500502082 | T | T | T |
| 0.8784720408039186 | 0.9324290877257260 | 0.9902833747850833 | T | T | T |
| 0.9308126605061291 | 0.9685868466819474 | 0.1994374132192023 | T | T | T |
| 0.8197614959891417 | 0.9485647315867858 | 0.3476659746329776 | T | T | T |
| 0.5780173178966455 | 0.1725571660972482 | 0.3310444306037283 | T | T | T |
| 0.6978286856396173 | 0.1305561656676772 | 0.1909627016385484 | T | T | T |
| 0.7321220156735992 | 0.1741926114597221 | 0.9723598929415350 | T | T | T |
| 0.8879669174054097 | 0.1738956794229888 | 0.9839426114138189 | T | T | T |
| 0.9354704847965167 | 0.1258410046697495 | 0.1958936227142804 | T | T | T |
| 0.8198056638634538 | 0.1695728602287173 | 0.3290172595836813 | T | T | T |
| 0.9230136792377538 | 0.0540106608250195 | 0.8548966513931664 | T | T | T |
| 0.8018176054983963 | 0.0253185835104488 | 0.7099534622167922 | T | T | T |
| 0.7804773563790511 | 0.0657994480487380 | 0.4905780716524448 | T | T | T |
| 0.6203182129390634 | 0.0696925086020014 | 0.4908148488328481 | T | T | T |
| 0.5683560824329067 | 0.0312211644608354 | 0.7005688980298427 | T | T | T |
| 0.6781393118240330 | 0.0525994654306316 | 0.8512282741354010 | T | T | T |
| 0.9229713239334667 | 0.8289735321405719 | 0.8297617730173643 | T | T | T |
| 0.8036238763204001 | 0.8671125699237560 | 0.6884064936079780 | T | T | T |
| 0.7653910649686642 | 0.8290358740600702 | 0.4697648110801244 | T | T | T |
| 0.6110176810533386 | 0.8283940962833086 | 0.4841743173437137 | T | T | T |
| 0.5635482426567129 | 0.8732959517323573 | 0.6968007538673521 | T | T | T |
| 0.6807891195346609 | 0.8281419819986140 | 0.8274969252720685 | T | T | T |
| 0.4249355282065906 | 0.4427187682433829 | 0.6458143730646507 | T | T | T |
| 0.3058654677449618 | 0.4701277029420388 | 0.7865214734551027 | T | T | T |
| 0.2799944612541497 | 0.4438106701152709 | 0.0116876171211559 | T | T | T |
| 0.1216377295047139 | 0.4362186424212492 | 0.0149744361028641 | T | T | T |
| 0.0670744864724447 | 0.4696877666941237 | 0.8039075483444847 | T | T | T |
| 0.1771825778056182 | 0.4392929417027240 | 0.6588569962983923 | T | T | T |
| 0.4164077303805237 | 0.6742428866284726 | 0.6625826775625944 | T | T | T |
| 0.3031964728684380 | 0.6281378128661165 | 0.7998375559657394 | T | T | T |

**Structure files (CONTCAR) involved in this work:**

|                    |                    |                    |   |   |   |
|--------------------|--------------------|--------------------|---|---|---|
| 0.2674123706448488 | 0.6706278775944475 | 0.0194423795713271 | T | T | T |
| 0.1133107094612518 | 0.6737611350257633 | 0.0090677047826715 | T | T | T |
| 0.0671515344759417 | 0.6275124263097065 | 0.7974381798819588 | T | T | T |
| 0.1808934763447562 | 0.6700224146663909 | 0.6626373619709427 | T | T | T |
| 0.0711222382788277 | 0.5593587155372498 | 0.1449231222359320 | T | T | T |
| 0.1907262495951746 | 0.5294381385527493 | 0.2851142528672245 | T | T | T |
| 0.2144770297366907 | 0.5567062464233719 | 0.5118311617598453 | T | T | T |
| 0.3735089350167001 | 0.5647975266632650 | 0.5134857793969134 | T | T | T |
| 0.4281999205805057 | 0.5299460489568247 | 0.3018224923016249 | T | T | T |
| 0.3189491233846644 | 0.5622444234800595 | 0.1561181570024004 | T | T | T |
| 0.0840123077949971 | 0.3258041134290586 | 0.1659464379397793 | T | T | T |
| 0.1965503458768257 | 0.3715513620835445 | 0.3022034642988447 | T | T | T |
| 0.2319541475423289 | 0.3317554623507236 | 0.5204974658150370 | T | T | T |
| 0.3867997845934464 | 0.3284246330942386 | 0.5076888309017531 | T | T | T |
| 0.4322061952458832 | 0.3724628484024739 | 0.2939742355814062 | T | T | T |
| 0.3164190836923455 | 0.3299588379602753 | 0.1643296579192390 | T | T | T |
| 0.3592449101735418 | 0.0693790897907219 | 0.7221212029157411 | T | T | T |
| 0.3164693787541989 | 0.0532437605066312 | 0.9068774853163405 | T | T | T |
| 0.2020374135754977 | 0.0520728016924643 | 0.0080785907077652 | T | T | T |
| 0.0920714251022185 | 0.0694946144999184 | 0.9008777041407682 | T | T | T |
| 0.1040707409339126 | 0.0643047742512428 | 0.7036527420829095 | T | T | T |
| 0.2297977742894874 | 0.0512678514512112 | 0.7593601567855209 | T | T | T |
| 0.3596175328584996 | 0.8269994941772768 | 0.7501322413278432 | T | T | T |
| 0.3045247681957867 | 0.8607546262510345 | 0.9215121644139399 | T | T | T |
| 0.1891571341037819 | 0.8537306562572075 | 0.0174741730811468 | T | T | T |
| 0.0869448286699050 | 0.8320917856884940 | 0.8960433008737303 | T | T | T |
| 0.1035686287868801 | 0.8409708599313760 | 0.7006599366174805 | T | T | T |
| 0.2288575976162912 | 0.8487430212531512 | 0.7607412679254624 | T | T | T |
| 0.3155725495101812 | 0.9503920274100272 | 0.7760012155077989 | T | T | T |
| 0.0886837244882170 | 0.9520791121952098 | 0.8091580043960127 | T | T | T |
| 0.4335533846049021 | 0.1291778514441834 | 0.5849101953328343 | T | T | T |
| 0.4131554232427422 | 0.9986523476353920 | 0.5712075468832876 | T | T | T |
| 0.3944370952237523 | 0.8666722434701120 | 0.5676755685036207 | T | T | T |
| 0.1964502227722544 | 0.1375093213231762 | 0.6167153804978283 | T | T | T |
| 0.1898211253169624 | 0.0052643305244413 | 0.5820651788660164 | T | T | T |
| 0.1984819077950671 | 0.8714218915496731 | 0.5685241042663486 | T | T | T |
| 0.9880452008912961 | 0.0400327532277263 | 0.7855177097060866 | T | T | T |
| 0.9856101614517953 | 0.8702686613250616 | 0.7811282401198878 | T | T | T |
| 0.1400341416626532 | 0.9314219000308996 | 0.2226660273674944 | T | T | T |
| 0.1833159512455274 | 0.9455651841708459 | 0.4076570987525905 | T | T | T |
| 0.2981787891432008 | 0.9495586827514463 | 0.5076869894286085 | T | T | T |
| 0.4083009675085098 | 0.9324365344943164 | 0.4005371090078166 | T | T | T |
| 0.3956575900150438 | 0.9374802239697623 | 0.2039711350563423 | T | T | T |
| 0.2696633166116619 | 0.9497645018426062 | 0.2598682859370826 | T | T | T |
| 0.1391234329645376 | 0.1728673605944367 | 0.2504792649559879 | T | T | T |
| 0.1955392414007115 | 0.1425214020110661 | 0.4210407720560904 | T | T | T |
| 0.3107840571554989 | 0.1483536774944128 | 0.5171997061320569 | T | T | T |
| 0.4139459847036642 | 0.1692995010326079 | 0.3971808680793891 | T | T | T |
| 0.3958137431438014 | 0.1614598092568466 | 0.2017031966982593 | T | T | T |
| 0.2702436452983167 | 0.1502118390112960 | 0.2584509374376519 | T | T | T |
| 0.1831325174748010 | 0.0498596315991666 | 0.2796279157418118 | T | T | T |
| 0.4126098240695711 | 0.0500422099727411 | 0.3084597859276877 | T | T | T |
| 0.0661803400113555 | 0.8737795984286364 | 0.0827195311729293 | T | T | T |



**Structure files (CONTCAR) involved in this work:**

|                    |                    |                    |   |   |   |
|--------------------|--------------------|--------------------|---|---|---|
| 0.0868328253233252 | 0.0048074800272031 | 0.0738029570743590 | T | T | T |
| 0.1064331406583644 | 0.1365973410640163 | 0.0659716351900484 | T | T | T |
| 0.3034582905700143 | 0.8635273151559647 | 0.1175499140822192 | T | T | T |
| 0.3096437334944562 | 0.9954444016058004 | 0.0824488865804408 | T | T | T |
| 0.3032227243750168 | 0.1290633411606000 | 0.0667858277713058 | T | T | T |
| 0.5122474297070151 | 0.9615650326111441 | 0.2838683315524496 | T | T | T |
| 0.5147248389950539 | 0.1337596599595694 | 0.2800844056648805 | T | T | T |
| 0.6362872406305174 | 0.5640132712922858 | 0.2788367358758111 | T | T | T |
| 0.7024368712572301 | 0.5727523790057381 | 0.1096755464416107 | T | T | T |
| 0.7952567366252867 | 0.5708314040744027 | 0.9661207237458680 | T | T | T |
| 0.8875979218676587 | 0.5740129417922085 | 0.1085384442581545 | T | T | T |
| 0.8892297016516048 | 0.5419221419183354 | 0.3037523326145222 | T | T | T |
| 0.7617378317939668 | 0.5243029890690943 | 0.2701200465295594 | T | T | T |
| 0.6389270319622318 | 0.3313529222181716 | 0.2511356727120151 | T | T | T |
| 0.6896508477130985 | 0.3436594809834871 | 0.0712892519938765 | T | T | T |
| 0.8097788583399501 | 0.3504918202453238 | 0.9881249820802421 | T | T | T |
| 0.9120667742201148 | 0.3262877439184207 | 0.1085099868081857 | T | T | T |
| 0.9045100653518447 | 0.3589722076207912 | 0.3019498655881293 | T | T | T |
| 0.7668028594064684 | 0.3663697529059935 | 0.2311181366394017 | T | T | T |
| 0.6688689058493303 | 0.4517122049815073 | 0.1823687919606996 | T | T | T |
| 0.9226067340760760 | 0.4527633143380596 | 0.1634961068609962 | T | T | T |
| 0.5622888587035509 | 0.6274749813683107 | 0.4132501489473662 | T | T | T |
| 0.5837097343330087 | 0.4971278544735110 | 0.4354398888915888 | T | T | T |
| 0.5929546247836823 | 0.3634171697946332 | 0.4332473075141003 | T | T | T |
| 0.8038762479486783 | 0.6321308456367658 | 0.3765676274414649 | T | T | T |
| 0.8098810182712686 | 0.5107019440535793 | 0.4551217751255209 | T | T | T |
| 0.8169397435910442 | 0.3787394471270110 | 0.4360749775595202 | T | T | T |
| 0.0024878963296574 | 0.5543640060374493 | 0.2099746682715389 | T | T | T |
| 0.0203071845421105 | 0.3675804769422060 | 0.2101008561669220 | T | T | T |
| 0.8587805600254702 | 0.4351621796538561 | 0.7844674983850196 | T | T | T |
| 0.7939007395387518 | 0.4294168086419680 | 0.6113945176286247 | T | T | T |
| 0.6989266655424305 | 0.4377422649593775 | 0.4686794388452993 | T | T | T |
| 0.6020644603878300 | 0.4284468283139399 | 0.6041629670390108 | T | T | T |
| 0.6087596621441583 | 0.4512256545773650 | 0.8001502219489666 | T | T | T |
| 0.7355227020675190 | 0.4829819764512798 | 0.7682002945577379 | T | T | T |
| 0.8617880358672019 | 0.6728452463666904 | 0.7610342176744939 | T | T | T |
| 0.7999344997192502 | 0.6613700242032468 | 0.5705727962447631 | T | T | T |
| 0.6870166435571561 | 0.6477463588331009 | 0.4671412688405541 | T | T | T |
| 0.5884161052107818 | 0.6721439621649083 | 0.5965980295397679 | T | T | T |
| 0.5969183203608435 | 0.6579775543812288 | 0.7923830543723742 | T | T | T |
| 0.7245663725155176 | 0.6345464370747970 | 0.7496292694884011 | T | T | T |
| 0.8371111633104574 | 0.5469470259236695 | 0.6764072256036023 | T | T | T |
| 0.5813956393234698 | 0.5502626400327406 | 0.6730666858811529 | T | T | T |
| 0.9323557352159438 | 0.3785571137763253 | 0.9266896692072514 | T | T | T |
| 0.9093249978074841 | 0.5089349720317906 | 0.9363080207188270 | T | T | T |
| 0.9079908472107759 | 0.6421119068748933 | 0.9437238407683148 | T | T | T |
| 0.7028618662142359 | 0.3756583725718798 | 0.8787731062991792 | T | T | T |
| 0.6838677439969384 | 0.4996565768435463 | 0.9481441606381572 | T | T | T |
| 0.6806740502635092 | 0.6346636032912061 | 0.9396437555386270 | T | T | T |
| 0.4921803398488598 | 0.4528386311716517 | 0.7118693895330817 | T | T | T |
| 0.4818672723044054 | 0.6345232005599587 | 0.7025091342175658 | T | T | T |
| 0.6427686051510689 | 0.9440965615199282 | 0.2847581595213798 | T | T | T |
| 0.6972721211669259 | 0.9279701588646028 | 0.1069040190635760 | T | T | T |

**Structure files (CONTCAR) involved in this work:**

|                    |                     |                    |   |   |   |
|--------------------|---------------------|--------------------|---|---|---|
| 0.7988357347555507 | 0.9455112078251316  | 0.9798260853027574 | T | T | T |
| 0.9001555519665744 | 0.9253655376924346  | 0.1067472181724091 | T | T | T |
| 0.8953414101252738 | 0.9477659407788669  | 0.3038057145621223 | T | T | T |
| 0.7704245332651263 | 0.9728994653052762  | 0.2582431687169861 | T | T | T |
| 0.6412359557028073 | 0.1684045792289389  | 0.2563301408634414 | T | T | T |
| 0.6986757894830895 | 0.1661678213844790  | 0.0820318484986095 | T | T | T |
| 0.8101066545634577 | 0.1510012611485003  | 0.9776190643064766 | T | T | T |
| 0.9133656000376462 | 0.1692552314279998  | 0.0986148725154819 | T | T | T |
| 0.8965019215620065 | 0.1523138502866595  | 0.2945124415971041 | T | T | T |
| 0.7703003730143597 | 0.1370996179044698  | 0.2443290983469917 | T | T | T |
| 0.6785275759294933 | 0.0515381456122020  | 0.1785844356561804 | T | T | T |
| 0.9185197922248411 | 0.0475153994320586  | 0.1744992666427189 | T | T | T |
| 0.5668465007444782 | 0.8768537372384438  | 0.4124209549543664 | T | T | T |
| 0.5818431265727207 | 0.0073667913571988  | 0.4374185586431514 | T | T | T |
| 0.5971447872576237 | 0.1396147104439696  | 0.4385719738353701 | T | T | T |
| 0.8015543978279730 | 0.8732286336107272  | 0.3839274739133017 | T | T | T |
| 0.8156258523352247 | -0.0002101671895336 | 0.4418278745300238 | T | T | T |
| 0.8061558506393077 | 0.1339251132164453  | 0.4368551117834482 | T | T | T |
| 0.0098488430671703 | 0.9534917944108350  | 0.2149091270132797 | T | T | T |
| 0.0154082223251823 | 0.1350835325203994  | 0.2139400359714714 | T | T | T |
| 0.8576512582257811 | 0.0565554289089557  | 0.7841132341587610 | T | T | T |
| 0.8007585326482519 | 0.0693502379299021  | 0.6078891613697237 | T | T | T |
| 0.7000063107035973 | 0.0584786675260823  | 0.4775182476054030 | T | T | T |
| 0.5999552800258027 | 0.0737790918794258  | 0.6079787439033765 | T | T | T |
| 0.6033166071751666 | 0.0529514740236560  | 0.8048823985261520 | T | T | T |
| 0.7292441709297058 | 0.0297846667512519  | 0.7632465195115782 | T | T | T |
| 0.8621786443862300 | 0.8294650068023217  | 0.7500985232855788 | T | T | T |
| 0.8040723768857773 | 0.8373491344330704  | 0.5756944514766817 | T | T | T |
| 0.6883249625602347 | 0.8539669593058717  | 0.4828699202718014 | T | T | T |
| 0.5838175833054357 | 0.8305323465823052  | 0.5981590321268017 | T | T | T |
| 0.6047114436328899 | 0.8465231538533534  | 0.7934720792554332 | T | T | T |
| 0.7312962000701049 | 0.8540176993975336  | 0.7399501750423382 | T | T | T |
| 0.8189525912337419 | 0.9473447838217874  | 0.6854139724515278 | T | T | T |
| 0.5802330021303941 | 0.9519920253695726  | 0.6771046882355856 | T | T | T |
| 0.9320267210365423 | 0.1261280807424170  | 0.9110190106825020 | T | T | T |
| 0.9175826296224582 | 0.9954810181425832  | 0.9394825814131758 | T | T | T |
| 0.8990695426327296 | 0.8632862802461908  | 0.9341037675675059 | T | T | T |
| 0.6942410781910719 | 0.1278778078126421  | 0.8907501112574306 | T | T | T |
| 0.6811822033571227 | 0.9992328945681921  | 0.9429256886905192 | T | T | T |
| 0.6972318266405495 | 0.8654968848040233  | 0.9328424886500104 | T | T | T |
| 0.4894023421532263 | 0.0470470405508708  | 0.7149904239052614 | T | T | T |
| 0.4840122818733184 | 0.8634600632281004  | 0.7174509803990534 | T | T | T |
| 0.3610096849158028 | 0.4312738780083571  | 0.7189579669533408 | T | T | T |
| 0.3091272394397053 | 0.4403323877059828  | 0.8990050157350481 | T | T | T |
| 0.1998092707756975 | 0.4574689142848864  | 0.0129648902266517 | T | T | T |
| 0.0929250903886612 | 0.4301681320905061  | 0.9025375739480722 | T | T | T |
| 0.1025083095227179 | 0.4373924523581634  | 0.7060567677696683 | T | T | T |
| 0.2304368182059759 | 0.4589045480137136  | 0.7455710172140878 | T | T | T |
| 0.3601643505515613 | 0.6749215246841603  | 0.7500694439976887 | T | T | T |
| 0.3014712561392952 | 0.6431873122171256  | 0.9179987249426804 | T | T | T |
| 0.1895630704171295 | 0.6471559036518868  | 0.0224126461451505 | T | T | T |
| 0.0928981062629772 | 0.6712796362067822  | 0.8920845808817920 | T | T | T |
| 0.1039220144089866 | 0.6557202257012187  | 0.6969733856795448 | T | T | T |

**Structure files (CONTCAR) involved in this work:**

|                    |                    |                    |   |   |   |
|--------------------|--------------------|--------------------|---|---|---|
| 0.2302742688607333 | 0.6444010189918725 | 0.7515424566674553 | T | T | T |
| 0.3229162659601503 | 0.5499154987301541 | 0.7819970923977611 | T | T | T |
| 0.0864462244260974 | 0.5488606804042506 | 0.8140763834634629 | T | T | T |
| 0.4340777350224782 | 0.3767130063470273 | 0.5751962140448380 | T | T | T |
| 0.4149027088712114 | 0.5080796280611291 | 0.5745656597304007 | T | T | T |
| 0.3851288429819290 | 0.6380477562149369 | 0.5638877134794856 | T | T | T |
| 0.1948658715287389 | 0.3650714939238314 | 0.6160975219667488 | T | T | T |
| 0.1782793691215012 | 0.4955869648379917 | 0.5709301280124512 | T | T | T |
| 0.1954532066504784 | 0.6292038496237864 | 0.5598185027707920 | T | T | T |
| 0.9867791004279249 | 0.4607333853965663 | 0.7922677265888249 | T | T | T |
| 0.9871342572929749 | 0.6351569288409887 | 0.7838088702132895 | T | T | T |
| 0.1336516668717120 | 0.5680520892921593 | 0.2208747884425735 | T | T | T |
| 0.1859289456842291 | 0.5567319096109542 | 0.3986423202039893 | T | T | T |
| 0.2946643694196309 | 0.5450393751024347 | 0.5149140072716631 | T | T | T |
| 0.4001220545698203 | 0.5688558965510822 | 0.3996439382168538 | T | T | T |
| 0.3932273568072641 | 0.5609820725558543 | 0.2030919634182205 | T | T | T |
| 0.2648007358761602 | 0.5451096859961616 | 0.2429876554644846 | T | T | T |
| 0.1408485079018802 | 0.3232036094067349 | 0.2518953649827078 | T | T | T |
| 0.1947231030938334 | 0.3598515327049251 | 0.4213460541844772 | T | T | T |
| 0.3098980129762545 | 0.3547723478592643 | 0.5170047820127145 | T | T | T |
| 0.4102064492950320 | 0.3293290511285084 | 0.3917083468071201 | T | T | T |
| 0.3937784719019626 | 0.3436879015082849 | 0.1955746178446968 | T | T | T |
| 0.2700548735565079 | 0.3529405864336886 | 0.2588942044130566 | T | T | T |
| 0.1767702397255182 | 0.4490446919911392 | 0.2773483064720605 | T | T | T |
| 0.4112285226929281 | 0.4503435426717102 | 0.3126656015036073 | T | T | T |
| 0.0647070276284437 | 0.6254130257329575 | 0.0743599393342719 | T | T | T |
| 0.0790159047299522 | 0.4924448389678418 | 0.0761973218040911 | T | T | T |
| 0.1126089115755554 | 0.3629523634851861 | 0.0667692310269037 | T | T | T |
| 0.3058535392381132 | 0.6373905395445297 | 0.1136676610927127 | T | T | T |
| 0.3154642110704575 | 0.5064973514408019 | 0.0677922804837103 | T | T | T |
| 0.2964760695770843 | 0.3727039666452964 | 0.0655759713555031 | T | T | T |
| 0.5076091728166017 | 0.5411133142751305 | 0.2880168750102729 | T | T | T |
| 0.5120182897703172 | 0.3652790253478800 | 0.2753535033504272 | T | T | T |
| 0.4359383108945447 | 0.7510152827852488 | 0.6348718766719634 | T | T | T |
| 0.1917061437794996 | 0.7491650813646328 | 0.6395934776779041 | T | T | T |
| 0.2739144271624374 | 0.7511095477998713 | 0.0260249322567954 | T | T | T |
| 0.1065219543968814 | 0.7503175226089740 | 0.0488924438740376 | T | T | T |
| 0.0616158371159633 | 0.2499473168524328 | 0.1384978626983365 | T | T | T |
| 0.3055679548041567 | 0.2511174960637080 | 0.1388024166335569 | T | T | T |
| 0.2254977390748953 | 0.2511581198416112 | 0.5277295385593112 | T | T | T |
| 0.3925716548226469 | 0.2519958386161274 | 0.5486583601511343 | T | T | T |
| 0.5579558970104623 | 0.2502936707105807 | 0.3502585756125383 | T | T | T |
| 0.8094981608611599 | 0.2486689959944481 | 0.3401574867944156 | T | T | T |
| 0.7258433351927567 | 0.2519220802337432 | 0.9364540182866037 | T | T | T |
| 0.8965836162019852 | 0.2514834328633238 | 0.9472492715009543 | T | T | T |
| 0.9471366067474700 | 0.7531066228142204 | 0.8547708976395684 | T | T | T |
| 0.6888029202502353 | 0.7484460612023776 | 0.8439037194217189 | T | T | T |
| 0.7676440237678099 | 0.7519290178052648 | 0.4317713183544655 | T | T | T |
| 0.6045387389466275 | 0.7521380621966225 | 0.4421465607565330 | T | T | T |
| 0.9537913467796804 | 0.4645641262993864 | 0.5200656168139870 | T | T | T |
| 0.8171876807052952 | 0.3326283994394085 | 0.3216106164999887 | T | T | T |
| 0.8017574171419714 | 0.6323287388426320 | 0.6922624668114660 | T | T | T |
| 0.9169877690686752 | 0.4110945135486064 | 0.4256410091942430 | T | T | T |

**Structure files (CONTCAR) involved in this work:**

|                    |                    |                    |   |   |   |
|--------------------|--------------------|--------------------|---|---|---|
| 0.9131143166432897 | 0.5426612364083074 | 0.5726589511626508 | T | T | T |
| 0.9965201204879230 | 0.6252643669403033 | 0.4490052652036683 | T | T | T |
| 0.9568187799707485 | 0.6350936782889579 | 0.5337736695466140 | T | T | T |
| 0.0223100691841552 | 0.5428266763928680 | 0.4261496040027181 | T | T | T |
| 0.0504597976812116 | 0.6333531312853747 | 0.4503874547337449 | T | T | T |
| 0.9736268408003450 | 0.6245593641337408 | 0.3749649885505956 | T | T | T |
| 0.9075013588877194 | 0.6576925954853440 | 0.5208553040769627 | T | T | T |
| 0.0034093707743867 | 0.5087327035215313 | 0.4562165099882365 | T | T | T |
| 0.9820507160390869 | 0.6519110328886276 | 0.6017899525427451 | T | T | T |

**Figure S15(b) C<sub>2</sub>H<sub>4</sub>+H<sub>2</sub>**

Si O Al Zn C H

1.0000000000000000

20.0219999999999985 0.0000000000000000 0.0000000000000000

0.0000000000000000 19.8990000000000009 0.0000000000000000

0.0000000000000000 0.0000000000000000 13.3829999999999991

94 193 2 2 2 6

Selective dynamics

Direct

|                    |                    |                    |   |   |   |
|--------------------|--------------------|--------------------|---|---|---|
| 0.4236599999999981 | 0.0600900000000024 | 0.6490799999999979 | T | T | T |
| 0.3055700000000030 | 0.0306700000000006 | 0.7918700000000030 | T | T | T |
| 0.2830900000000014 | 0.0578599999999980 | 0.0171199999999985 | T | T | T |
| 0.1229399999999998 | 0.0649099999999976 | 0.0131799999999984 | T | T | T |
| 0.0677499999999966 | 0.0310199999999980 | 0.8010000000000019 | T | T | T |
| 0.1806600000000032 | 0.0636999999999972 | 0.6643100000000004 | T | T | T |
| 0.4198499999999967 | 0.8276299999999992 | 0.6681700000000035 | T | T | T |
| 0.3026199999999974 | 0.8716900000000010 | 0.8020199999999988 | T | T | T |
| 0.2677100000000010 | 0.8322500000000019 | 0.0207300000000004 | T | T | T |
| 0.1127600000000015 | 0.8277100000000033 | 0.0108499999999978 | T | T | T |
| 0.0656099999999995 | 0.8731700000000018 | 0.7969500000000025 | T | T | T |
| 0.1811700000000016 | 0.8276499999999984 | 0.6670000000000016 | T | T | T |
| 0.0776699999999977 | 0.9415199999999970 | 0.1494300000000024 | T | T | T |
| 0.1955200000000019 | 0.9700899999999990 | 0.2926000000000002 | T | T | T |
| 0.2179599999999979 | 0.9425200000000018 | 0.5170400000000015 | T | T | T |
| 0.3780199999999994 | 0.9365799999999993 | 0.5132400000000032 | T | T | T |
| 0.4341000000000008 | 0.9688200000000009 | 0.3011100000000013 | T | T | T |
| 0.3204599999999971 | 0.9374200000000030 | 0.1654800000000023 | T | T | T |
| 0.0818500000000029 | 0.1738500000000016 | 0.1667599999999965 | T | T | T |
| 0.1987000000000023 | 0.1292499999999990 | 0.3017299999999992 | T | T | T |
| 0.2330100000000002 | 0.1700999999999979 | 0.5203100000000020 | T | T | T |
| 0.3882199999999969 | 0.1736700000000013 | 0.5100600000000028 | T | T | T |
| 0.4361999999999995 | 0.1269700000000000 | 0.2961600000000004 | T | T | T |
| 0.3200599999999980 | 0.1724999999999994 | 0.1665800000000033 | T | T | T |
| 0.5738199999999978 | 0.5562899999999971 | 0.3565499999999986 | T | T | T |
| 0.6888599999999983 | 0.5256200000000035 | 0.2032600000000002 | T | T | T |
| 0.7120999999999995 | 0.5676100000000019 | 0.9892499999999984 | T | T | T |
| 0.8718900000000005 | 0.5705099999999987 | 0.9856399999999965 | T | T | T |
| 0.9278100000000009 | 0.5326200000000014 | 0.1925600000000003 | T | T | T |
| 0.8113600000000005 | 0.5542500000000032 | 0.3365399999999994 | T | T | T |
| 0.5756700000000023 | 0.3269400000000005 | 0.3284200000000013 | T | T | T |
| 0.6935000000000002 | 0.3710799999999992 | 0.1863900000000029 | T | T | T |
| 0.7305599999999970 | 0.3278400000000019 | 0.9736699999999985 | T | T | T |
| 0.8852300000000000 | 0.3270899999999983 | 0.9937699999999978 | T | T | T |
| 0.9412999999999982 | 0.3772499999999965 | 0.1939899999999994 | T | T | T |

**Structure files (CONTCAR) involved in this work:**

|                    |                    |                    |   |   |   |
|--------------------|--------------------|--------------------|---|---|---|
| 0.9196099999999987 | 0.4442799999999991 | 0.8558599999999998 | T | T | T |
| 0.8033300000000025 | 0.4732199999999978 | 0.7117700000000013 | T | T | T |
| 0.7729700000000008 | 0.4403900000000007 | 0.4881999999999991 | T | T | T |
| 0.6150099999999981 | 0.4313199999999995 | 0.4863399999999984 | T | T | T |
| 0.5692499999999967 | 0.4693699999999978 | 0.6986500000000007 | T | T | T |
| 0.6793499999999995 | 0.4494600000000020 | 0.8509600000000006 | T | T | T |
| 0.9199500000000000 | 0.6766399999999990 | 0.8316500000000033 | T | T | T |
| 0.7691299999999970 | 0.6695399999999978 | 0.4624900000000025 | T | T | T |
| 0.6144800000000004 | 0.6739400000000018 | 0.4856300000000005 | T | T | T |
| 0.5627700000000004 | 0.6278099999999966 | 0.6961200000000005 | T | T | T |
| 0.6783300000000025 | 0.6712599999999966 | 0.8228700000000018 | T | T | T |
| 0.5786700000000025 | 0.9456399999999974 | 0.3577299999999966 | T | T | T |
| 0.6993599999999986 | 0.9724300000000028 | 0.2122799999999998 | T | T | T |
| 0.7206400000000031 | 0.9341799999999978 | 0.9926600000000008 | T | T | T |
| 0.8807699999999983 | 0.9338699999999989 | 0.9948800000000020 | T | T | T |
| 0.9329999999999998 | 0.9695899999999966 | 0.2046700000000001 | T | T | T |
| 0.8228900000000010 | 0.9470000000000027 | 0.3539900000000031 | T | T | T |
| 0.5793000000000035 | 0.1718699999999984 | 0.3312000000000026 | T | T | T |
| 0.6994400000000027 | 0.1299599999999970 | 0.1927900000000022 | T | T | T |
| 0.7329700000000017 | 0.1718699999999984 | 0.9733500000000035 | T | T | T |
| 0.8878800000000027 | 0.1738500000000016 | 0.9872399999999999 | T | T | T |
| 0.9375199999999992 | 0.1272499999999965 | 0.1991999999999976 | T | T | T |
| 0.8212600000000023 | 0.1708500000000015 | 0.3299599999999998 | T | T | T |
| 0.9233300000000000 | 0.0555599999999998 | 0.8575400000000002 | T | T | T |
| 0.8031900000000007 | 0.0266299999999973 | 0.7109200000000016 | T | T | T |
| 0.7813900000000018 | 0.0661699999999996 | 0.4924699999999973 | T | T | T |
| 0.6212599999999995 | 0.0691199999999981 | 0.4919200000000004 | T | T | T |
| 0.5690000000000026 | 0.0310699999999997 | 0.7011099999999999 | T | T | T |
| 0.6794999999999973 | 0.0516700000000014 | 0.8511099999999985 | T | T | T |
| 0.9231899999999982 | 0.8292300000000026 | 0.8367000000000004 | T | T | T |
| 0.8038999999999987 | 0.8697999999999979 | 0.6950900000000004 | T | T | T |
| 0.7702900000000028 | 0.8272800000000018 | 0.4777100000000019 | T | T | T |
| 0.6155100000000004 | 0.8272699999999986 | 0.4894000000000034 | T | T | T |
| 0.5648199999999974 | 0.8736699999999971 | 0.6987499999999969 | T | T | T |
| 0.6808800000000019 | 0.8309899999999999 | 0.8300500000000000 | T | T | T |
| 0.4240899999999996 | 0.4425600000000003 | 0.6414600000000021 | T | T | T |
| 0.3051800000000000 | 0.4699299999999980 | 0.7840800000000030 | T | T | T |
| 0.2804900000000004 | 0.4426199999999980 | 0.0078200000000024 | T | T | T |
| 0.1221099999999993 | 0.4369900000000015 | 0.0119800000000012 | T | T | T |
| 0.0659100000000024 | 0.4690200000000004 | 0.8008000000000024 | T | T | T |
| 0.1771999999999991 | 0.4399999999999977 | 0.6558899999999994 | T | T | T |
| 0.4184199999999976 | 0.6741000000000028 | 0.6616799999999969 | T | T | T |
| 0.3020500000000013 | 0.6280700000000010 | 0.7968600000000023 | T | T | T |
| 0.2686399999999978 | 0.6713700000000031 | 0.0177600000000027 | T | T | T |
| 0.1146099999999990 | 0.6737699999999975 | 0.0103000000000009 | T | T | T |
| 0.0656200000000027 | 0.6277400000000029 | 0.7995499999999964 | T | T | T |
| 0.1785500000000013 | 0.6697699999999998 | 0.6625999999999976 | T | T | T |
| 0.0731200000000030 | 0.5593700000000013 | 0.1454200000000014 | T | T | T |
| 0.1943300000000008 | 0.5295300000000012 | 0.2829400000000035 | T | T | T |
| 0.2154200000000017 | 0.5582800000000034 | 0.5112600000000000 | T | T | T |
| 0.3751499999999979 | 0.5659800000000033 | 0.5108699999999970 | T | T | T |
| 0.4290499999999966 | 0.5304199999999994 | 0.2990300000000019 | T | T | T |
| 0.3214699999999979 | 0.5608300000000028 | 0.1500199999999978 | T | T | T |

**Structure files (CONTCAR) involved in this work:**

|                    |                    |                    |   |   |   |
|--------------------|--------------------|--------------------|---|---|---|
| 0.0846799999999988 | 0.3267600000000002 | 0.1636000000000024 | T | T | T |
| 0.1976500000000030 | 0.3714200000000005 | 0.3013499999999993 | T | T | T |
| 0.2322899999999990 | 0.3311800000000034 | 0.5194699999999983 | T | T | T |
| 0.3871299999999991 | 0.3276600000000016 | 0.5042699999999982 | T | T | T |
| 0.4336800000000025 | 0.3723099999999988 | 0.2913500000000013 | T | T | T |
| 0.3171099999999996 | 0.3301999999999978 | 0.1632600000000011 | T | T | T |
| 0.3597099999999998 | 0.0692700000000031 | 0.7224300000000028 | T | T | T |
| 0.3162999999999982 | 0.0534200000000027 | 0.9068600000000018 | T | T | T |
| 0.2025900000000007 | 0.0511499999999998 | 0.0101799999999983 | T | T | T |
| 0.0934499999999971 | 0.0688299999999984 | 0.9010699999999972 | T | T | T |
| 0.1040899999999993 | 0.0638399999999990 | 0.7040799999999976 | T | T | T |
| 0.2300600000000017 | 0.0506000000000029 | 0.7589100000000002 | T | T | T |
| 0.3609799999999979 | 0.8268800000000027 | 0.7515300000000025 | T | T | T |
| 0.3048199999999994 | 0.8604100000000017 | 0.9215799999999987 | T | T | T |
| 0.1895400000000009 | 0.8543599999999998 | 0.0169100000000029 | T | T | T |
| 0.0869900000000001 | 0.8317499999999995 | 0.8964300000000023 | T | T | T |
| 0.1041499999999971 | 0.8412399999999991 | 0.7008000000000010 | T | T | T |
| 0.2298699999999982 | 0.8487300000000033 | 0.7595900000000029 | T | T | T |
| 0.3163300000000007 | 0.9502600000000001 | 0.7764799999999994 | T | T | T |
| 0.0865200000000002 | 0.9515900000000030 | 0.8093999999999966 | T | T | T |
| 0.4337299999999971 | 0.1286199999999980 | 0.5846299999999971 | T | T | T |
| 0.4136700000000033 | 0.9978699999999989 | 0.5722799999999992 | T | T | T |
| 0.3938800000000029 | 0.8659600000000012 | 0.5685100000000034 | T | T | T |
| 0.1967399999999984 | 0.1367499999999993 | 0.6163600000000002 | T | T | T |
| 0.1891299999999987 | 0.0046200000000027 | 0.5820399999999992 | T | T | T |
| 0.1985299999999981 | 0.8709399999999974 | 0.5676199999999980 | T | T | T |
| 0.9879000000000033 | 0.0414000000000030 | 0.7873099999999980 | T | T | T |
| 0.9854300000000009 | 0.8666300000000007 | 0.7805200000000028 | T | T | T |
| 0.1424000000000021 | 0.9316000000000031 | 0.2211199999999991 | T | T | T |
| 0.1841999999999970 | 0.9459000000000017 | 0.4069100000000034 | T | T | T |
| 0.2982900000000015 | 0.9498600000000010 | 0.5089499999999987 | T | T | T |
| 0.4081499999999991 | 0.9315500000000014 | 0.4015600000000035 | T | T | T |
| 0.3971200000000010 | 0.9363900000000029 | 0.2044700000000006 | T | T | T |
| 0.2714399999999983 | 0.9513200000000026 | 0.2603700000000018 | T | T | T |
| 0.1416600000000017 | 0.1743400000000008 | 0.2484499999999983 | T | T | T |
| 0.1957400000000007 | 0.1430199999999999 | 0.4206000000000003 | T | T | T |
| 0.3111000000000033 | 0.1476800000000011 | 0.5162499999999994 | T | T | T |
| 0.4148199999999989 | 0.1676300000000026 | 0.3962799999999973 | T | T | T |
| 0.3971700000000027 | 0.1597099999999969 | 0.2008300000000034 | T | T | T |
| 0.2720199999999977 | 0.1500699999999995 | 0.2593699999999970 | T | T | T |
| 0.1836100000000016 | 0.0505100000000027 | 0.2792200000000022 | T | T | T |
| 0.4158800000000014 | 0.0484099999999970 | 0.3082399999999978 | T | T | T |
| 0.0667600000000022 | 0.8738299999999981 | 0.0832400000000035 | T | T | T |
| 0.0865999999999971 | 0.0048800000000000 | 0.0743399999999994 | T | T | T |
| 0.1067600000000013 | 0.1364900000000020 | 0.0657300000000021 | T | T | T |
| 0.3035700000000006 | 0.8644999999999996 | 0.1178200000000018 | T | T | T |
| 0.3118600000000029 | 0.9961399999999969 | 0.0828100000000020 | T | T | T |
| 0.3032600000000016 | 0.1294400000000024 | 0.0667699999999982 | T | T | T |
| 0.5137300000000025 | 0.9569600000000023 | 0.2871000000000024 | T | T | T |
| 0.5164299999999997 | 0.1330400000000012 | 0.2792000000000030 | T | T | T |
| 0.6392000000000024 | 0.5574299999999965 | 0.2857500000000002 | T | T | T |
| 0.6894800000000032 | 0.5740699999999990 | 0.1056999999999988 | T | T | T |
| 0.7924099999999967 | 0.5568799999999996 | 0.9804999999999993 | T | T | T |

**Structure files (CONTCAR) involved in this work:**

|                    |                    |                    |   |   |   |
|--------------------|--------------------|--------------------|---|---|---|
| 0.8947000000000003 | 0.5754599999999996 | 0.1026000000000025 | T | T | T |
| 0.8884600000000020 | 0.5444900000000032 | 0.2985699999999980 | T | T | T |
| 0.7640000000000029 | 0.5241299999999995 | 0.2507400000000004 | T | T | T |
| 0.6414499999999990 | 0.3317800000000020 | 0.2592399999999984 | T | T | T |
| 0.6881199999999978 | 0.3371599999999972 | 0.0758099999999970 | T | T | T |
| 0.8078100000000035 | 0.3511400000000009 | 0.9920499999999990 | T | T | T |
| 0.9117999999999995 | 0.3273200000000003 | 0.1094900000000010 | T | T | T |
| 0.9052300000000031 | 0.3616400000000013 | 0.3028300000000002 | T | T | T |
| 0.7680900000000008 | 0.3663600000000002 | 0.2299099999999967 | T | T | T |
| 0.6682699999999997 | 0.4491799999999984 | 0.1762500000000031 | T | T | T |
| 0.9241000000000028 | 0.4538000000000011 | 0.1620199999999983 | T | T | T |
| 0.5680100000000010 | 0.6278700000000015 | 0.4136700000000033 | T | T | T |
| 0.5775999999999968 | 0.4963400000000036 | 0.4391299999999987 | T | T | T |
| 0.5874900000000025 | 0.3626599999999982 | 0.4365400000000008 | T | T | T |
| 0.7973399999999984 | 0.6327100000000030 | 0.3609799999999979 | T | T | T |
| 0.8023799999999994 | 0.5132100000000008 | 0.4438000000000031 | T | T | T |
| 0.8143299999999982 | 0.3807600000000022 | 0.4344299999999990 | T | T | T |
| 0.0052099999999982 | 0.5536499999999975 | 0.2123500000000007 | T | T | T |
| 0.0209499999999991 | 0.3678000000000026 | 0.2089599999999976 | T | T | T |
| 0.8568899999999999 | 0.4322400000000002 | 0.7799499999999995 | T | T | T |
| 0.7877900000000011 | 0.4350400000000008 | 0.6067200000000028 | T | T | T |
| 0.6945300000000003 | 0.4376200000000026 | 0.4623800000000031 | T | T | T |
| 0.6020699999999977 | 0.4282899999999970 | 0.6054000000000030 | T | T | T |
| 0.6059199999999976 | 0.4450700000000012 | 0.8002499999999984 | T | T | T |
| 0.7332800000000006 | 0.4801700000000011 | 0.7714399999999983 | T | T | T |
| 0.8648099999999985 | 0.6787300000000016 | 0.7458999999999989 | T | T | T |
| 0.8144899999999993 | 0.6449100000000030 | 0.5557500000000033 | T | T | T |
| 0.6915400000000034 | 0.6474800000000016 | 0.4806099999999986 | T | T | T |
| 0.5870600000000010 | 0.6699100000000016 | 0.5989100000000036 | T | T | T |
| 0.5996600000000001 | 0.6582099999999969 | 0.7941900000000004 | T | T | T |
| 0.7257099999999994 | 0.6423399999999972 | 0.7357299999999967 | T | T | T |
| 0.8344900000000024 | 0.5471199999999996 | 0.6830700000000007 | T | T | T |
| 0.5811800000000034 | 0.5490399999999980 | 0.6800100000000029 | T | T | T |
| 0.9295100000000005 | 0.3777800000000013 | 0.9253700000000009 | T | T | T |
| 0.9090100000000021 | 0.5086000000000013 | 0.9290900000000022 | T | T | T |
| 0.8926900000000018 | 0.6407099999999986 | 0.9336199999999977 | T | T | T |
| 0.7000099999999989 | 0.3740499999999969 | 0.8848699999999994 | T | T | T |
| 0.6758000000000024 | 0.5005299999999977 | 0.9453499999999977 | T | T | T |
| 0.6910200000000017 | 0.6352600000000024 | 0.9309500000000028 | T | T | T |
| 0.4902200000000008 | 0.4524199999999965 | 0.7099600000000024 | T | T | T |
| 0.4822699999999998 | 0.6351599999999991 | 0.7094999999999985 | T | T | T |
| 0.6443500000000029 | 0.9410600000000002 | 0.2876300000000001 | T | T | T |
| 0.6998600000000010 | 0.9288499999999971 | 0.1096500000000020 | T | T | T |
| 0.8009300000000010 | 0.9437599999999975 | 0.9805599999999970 | T | T | T |
| 0.9004100000000008 | 0.9278800000000018 | 0.1121300000000005 | T | T | T |
| 0.8982999999999990 | 0.9484500000000011 | 0.3095199999999991 | T | T | T |
| 0.7723799999999983 | 0.9679700000000011 | 0.2642700000000033 | T | T | T |
| 0.6430599999999984 | 0.1689099999999968 | 0.2572699999999983 | T | T | T |
| 0.6974099999999979 | 0.1613699999999980 | 0.0810699999999969 | T | T | T |
| 0.8107400000000027 | 0.1483199999999982 | 0.9820800000000034 | T | T | T |
| 0.9145600000000016 | 0.1694900000000032 | 0.1012399999999971 | T | T | T |
| 0.8983899999999991 | 0.1537700000000015 | 0.2975800000000035 | T | T | T |
| 0.7726899999999972 | 0.1398599999999988 | 0.2426000000000030 | T | T | T |

**Structure files (CONTCAR) involved in this work:**

|                    |                    |                    |   |   |   |
|--------------------|--------------------|--------------------|---|---|---|
| 0.6815199999999990 | 0.0503199999999993 | 0.1880700000000033 | T | T | T |
| 0.9214199999999977 | 0.0485499999999988 | 0.1803700000000035 | T | T | T |
| 0.5704100000000025 | 0.8755099999999985 | 0.4188199999999966 | T | T | T |
| 0.5830699999999993 | 0.0066300000000012 | 0.4383800000000022 | T | T | T |
| 0.5983599999999996 | 0.1386899999999969 | 0.4385499999999993 | T | T | T |
| 0.8083499999999972 | 0.8713899999999981 | 0.3935800000000000 | T | T | T |
| 0.8169400000000024 | 0.9995199999999969 | 0.4462800000000016 | T | T | T |
| 0.8058800000000019 | 0.1336900000000014 | 0.4361699999999971 | T | T | T |
| 0.0119600000000020 | 0.9530699999999968 | 0.2178299999999993 | T | T | T |
| 0.0173899999999989 | 0.1372199999999992 | 0.2162900000000008 | T | T | T |
| 0.8575400000000002 | 0.0579200000000029 | 0.7874300000000005 | T | T | T |
| 0.8021400000000014 | 0.0715999999999966 | 0.6096500000000020 | T | T | T |
| 0.7010000000000005 | 0.0575800000000015 | 0.4802400000000020 | T | T | T |
| 0.6003699999999981 | 0.0741000000000014 | 0.6088600000000000 | T | T | T |
| 0.6042800000000028 | 0.0513899999999978 | 0.8059799999999981 | T | T | T |
| 0.7298899999999975 | 0.0283799999999985 | 0.7624300000000019 | T | T | T |
| 0.8587199999999982 | 0.8327400000000011 | 0.7642400000000009 | T | T | T |
| 0.8065100000000029 | 0.8347399999999965 | 0.5856700000000004 | T | T | T |
| 0.6930400000000034 | 0.8523700000000005 | 0.4864499999999978 | T | T | T |
| 0.5885899999999964 | 0.8289699999999982 | 0.6036100000000033 | T | T | T |
| 0.6041999999999987 | 0.8489900000000006 | 0.7984799999999979 | T | T | T |
| 0.7298800000000014 | 0.8612899999999968 | 0.7434599999999989 | T | T | T |
| 0.8220099999999988 | 0.9491299999999967 | 0.6846800000000002 | T | T | T |
| 0.5810400000000016 | 0.9520600000000030 | 0.6759300000000010 | T | T | T |
| 0.9327899999999971 | 0.1277600000000021 | 0.9130099999999999 | T | T | T |
| 0.9181900000000027 | 0.9976300000000009 | 0.9431799999999981 | T | T | T |
| 0.9058800000000033 | 0.8649899999999988 | 0.9425200000000018 | T | T | T |
| 0.6962499999999991 | 0.1272799999999989 | 0.8884499999999989 | T | T | T |
| 0.6839399999999998 | 0.9995400000000032 | 0.9444000000000017 | T | T | T |
| 0.6975100000000012 | 0.8654300000000035 | 0.9374200000000030 | T | T | T |
| 0.4900400000000005 | 0.0470499999999987 | 0.7154400000000010 | T | T | T |
| 0.4850100000000026 | 0.8641700000000014 | 0.7162000000000006 | T | T | T |
| 0.3591399999999965 | 0.4324099999999973 | 0.7128399999999999 | T | T | T |
| 0.3088600000000028 | 0.4368800000000022 | 0.8947199999999995 | T | T | T |
| 0.2005300000000005 | 0.4575999999999993 | 0.0097499999999968 | T | T | T |
| 0.0932699999999969 | 0.4306500000000000 | 0.8996899999999997 | T | T | T |
| 0.1023199999999989 | 0.4384799999999984 | 0.7023099999999971 | T | T | T |
| 0.2294399999999968 | 0.4606500000000011 | 0.7434900000000013 | T | T | T |
| 0.3575700000000026 | 0.6738100000000031 | 0.7416800000000023 | T | T | T |
| 0.3016000000000005 | 0.6475099999999969 | 0.9136499999999970 | T | T | T |
| 0.1909899999999993 | 0.6471700000000027 | 0.0226800000000011 | T | T | T |
| 0.0936299999999974 | 0.6703100000000006 | 0.8937700000000035 | T | T | T |
| 0.1017300000000034 | 0.6572499999999977 | 0.6992400000000032 | T | T | T |
| 0.2284399999999991 | 0.6422000000000025 | 0.7496300000000033 | T | T | T |
| 0.3227699999999984 | 0.5496399999999966 | 0.7849799999999973 | T | T | T |
| 0.0835099999999969 | 0.5485600000000019 | 0.8119599999999991 | T | T | T |
| 0.4339700000000022 | 0.3760699999999986 | 0.5722299999999976 | T | T | T |
| 0.4161700000000010 | 0.5074100000000001 | 0.5685900000000004 | T | T | T |
| 0.3935999999999993 | 0.6385000000000005 | 0.5587599999999995 | T | T | T |
| 0.1958100000000016 | 0.3655100000000004 | 0.6148200000000017 | T | T | T |
| 0.1797299999999993 | 0.4950400000000030 | 0.5661800000000028 | T | T | T |
| 0.1910499999999971 | 0.6291500000000028 | 0.5591000000000008 | T | T | T |
| 0.9861999999999966 | 0.4565800000000024 | 0.7891699999999986 | T | T | T |



**Structure files (CONTCAR) involved in this work:**

|                   |                   |                   |   |   |   |
|-------------------|-------------------|-------------------|---|---|---|
| 0.985509999999979 | 0.635759999999977 | 0.789979999999999 | T | T | T |
| 0.136609999999975 | 0.567660000000036 | 0.219499999999965 | T | T | T |
| 0.192659999999965 | 0.558639999999969 | 0.395440000000007 | T | T | T |
| 0.295830000000023 | 0.550480000000003 | 0.522089999999986 | T | T | T |
| 0.396450000000015 | 0.568710000000029 | 0.394359999999989 | T | T | T |
| 0.395699999999979 | 0.558549999999968 | 0.197209999999983 | T | T | T |
| 0.267620000000009 | 0.543109999999986 | 0.236750000000007 | T | T | T |
| 0.142130000000016 | 0.324289999999977 | 0.248480000000007 | T | T | T |
| 0.194490000000018 | 0.357649999999996 | 0.419910000000016 | T | T | T |
| 0.310240000000003 | 0.353980000000000 | 0.513370000000019 | T | T | T |
| 0.410919999999973 | 0.328789999999979 | 0.388399999999972 | T | T | T |
| 0.394500000000007 | 0.345520000000005 | 0.192500000000026 | T | T | T |
| 0.271389999999967 | 0.353000000000015 | 0.258560000000028 | T | T | T |
| 0.179020000000013 | 0.449370000000018 | 0.278649999999990 | T | T | T |
| 0.415210000000019 | 0.450470000000028 | 0.311979999999984 | T | T | T |
| 0.065869999999968 | 0.626229999999996 | 0.076610000000023 | T | T | T |
| 0.080379999999981 | 0.493549999999990 | 0.074100000000014 | T | T | T |
| 0.112499999999972 | 0.363889999999978 | 0.064030000000025 | T | T | T |
| 0.308909999999974 | 0.636360000000034 | 0.108820000000015 | T | T | T |
| 0.317480000000033 | 0.505809999999968 | 0.060679999999978 | T | T | T |
| 0.295940000000016 | 0.372149999999978 | 0.064300000000029 | T | T | T |
| 0.508169999999998 | 0.545409999999968 | 0.288269999999971 | T | T | T |
| 0.513240000000032 | 0.363250000000007 | 0.271650000000011 | T | T | T |
| 0.438150000000003 | 0.751190000000011 | 0.636490000000020 | T | T | T |
| 0.191360000000031 | 0.748779999999964 | 0.640300000000034 | T | T | T |
| 0.274290000000006 | 0.751699999999996 | 0.028799999999968 | T | T | T |
| 0.107900000000008 | 0.750509999999985 | 0.049320000000016 | T | T | T |
| 0.062919999999983 | 0.250660000000034 | 0.136249999999969 | T | T | T |
| 0.307389999999981 | 0.250970000000024 | 0.139449999999965 | T | T | T |
| 0.226149999999970 | 0.250689999999987 | 0.529449999999971 | T | T | T |
| 0.393009999999968 | 0.251390000000007 | 0.545760000000014 | T | T | T |
| 0.558050000000015 | 0.249160000000034 | 0.351170000000033 | T | T | T |
| 0.811529999999976 | 0.249850000000021 | 0.342570000000020 | T | T | T |
| 0.727769999999996 | 0.249859999999982 | 0.938479999999984 | T | T | T |
| 0.893389999999966 | 0.251500000000001 | 0.950440000000004 | T | T | T |
| 0.943480000000010 | 0.752299999999982 | 0.861649999999974 | T | T | T |
| 0.690959999999969 | 0.751040000000033 | 0.840820000000008 | T | T | T |
| 0.774529999999986 | 0.749560000000024 | 0.442349999999976 | T | T | T |
| 0.610059999999972 | 0.751060000000025 | 0.447139999999974 | T | T | T |
| 0.943319999999999 | 0.475540000000023 | 0.516950000000014 | T | T | T |
| 0.818210000000005 | 0.333799999999965 | 0.322099999999989 | T | T | T |
| 0.804299999999978 | 0.632910000000025 | 0.685800000000004 | T | T | T |
| 0.917169999999987 | 0.417400000000007 | 0.423149999999997 | T | T | T |
| 0.893000000000007 | 0.550440000000018 | 0.553379999999971 | T | T | T |
| 0.967120000000013 | 0.639400000000020 | 0.453560000000031 | T | T | T |
| 0.978630000000026 | 0.632790000000000 | 0.552360000000002 | T | T | T |
| 0.068429999999993 | 0.491160000000007 | 0.400440000000032 | T | T | T |
| 0.991030000000021 | 0.606450000000024 | 0.399039999999994 | T | T | T |
| 0.934660000000009 | 0.679000000000020 | 0.424529999999972 | T | T | T |
| 0.957459999999975 | 0.667780000000005 | 0.606630000000027 | T | T | T |
| 0.039299999999972 | 0.490009999999981 | 0.436660000000034 | T | T | T |
| 0.014600000000015 | 0.595700000000008 | 0.579470000000006 | T | T | T |

**Figure S17 ZnFe-IS**

**Structure files (CONTCAR) involved in this work:**

Si O Al Zn Fe H C

1.0000000000000000

20.0219999999999985 0.0000000000000000 0.0000000000000000

0.0000000000000000 19.8990000000000009 0.0000000000000000

0.0000000000000000 0.0000000000000000 13.3829999999999991

93 193 3 1 1 6 2

Selective dynamics

Direct

0.4229141193706922 0.0581534253114713 0.6490883143545297 T T T

0.3061591895854937 0.0285490877315067 0.7953985143611695 T T T

0.2822829973217841 0.0581866244201676 0.0169621793247954 T T T

0.1228348547737962 0.0614968416342992 0.0118088705959296 T T T

0.0683700970143451 0.0293656397713282 0.8004650033206943 T T T

0.1818380154606187 0.0582197250249544 0.6637155556435087 T T T

0.4204982208842057 0.8262553328236513 0.6704443534606123 T T T

0.3043870563273366 0.8696060584116362 0.8092387262831741 T T T

0.2669173036003142 0.8291518364719338 0.0277058555912679 T T T

0.1121638398493219 0.8261575318656958 0.0149120558832933 T T T

0.0655622330909704 0.8721343650055945 0.8006507526907991 T T T

0.1827388874976745 0.8272064711239483 0.6735010810291313 T T T

0.0777387886656615 0.9407465813805596 0.1507226375868297 T T T

0.1958565103404133 0.9705261852915278 0.2951467236913694 T T T

0.2190347202077511 0.9381761106196899 0.5172787819413354 T T T

0.3794576662811682 0.9338168861891456 0.5139301459438398 T T T

0.4345633808561756 0.9680667819613205 0.3019089301309648 T T T

0.3208515997519272 0.9398636032784443 0.1640788287713477 T T T

0.0822746189466202 0.1715565707042623 0.1666103577048148 T T T

0.1962436893577899 0.1296993477633967 0.3094548198863199 T T T

0.2334839982370460 0.1696220399004464 0.5262974920665656 T T T

0.3880367997912376 0.1727119896052550 0.5101327464606782 T T T

0.4365196029240395 0.1264831692551449 0.2972111903265679 T T T

0.3170254809553860 0.1705646619388137 0.1727968488868664 T T T

0.5779701803020146 0.5566433678554417 0.3544270488557958 T T T

0.6883621655319484 0.5272514404627661 0.1992176261526062 T T T

0.7162768134119057 0.5649309965087036 0.9835484362554100 T T T

0.8747887399072807 0.5709845029868799 0.9827830383695015 T T T

0.8090474483570232 0.5516776102427172 0.3372105055344648 T T T

0.5739631897578196 0.3274578403827699 0.3285017871082655 T T T

0.6926476728839248 0.3737950861085103 0.1902671787244752 T T T

0.7327368600462897 0.3279456496277147 0.9776151336476210 T T T

0.8876682635192243 0.3253312867538249 0.9901138760814550 T T T

0.9431979023267744 0.3739847812128743 0.1887124346325499 T T T

0.9210009342223657 0.4452232603130109 0.8564172289933035 T T T

0.8011435077814669 0.4740679608516351 0.7151862227454726 T T T

0.7776402920773891 0.4354167215287180 0.4907388411965417 T T T

0.6193703810140216 0.4288589631067155 0.4870590011404379 T T T

0.5687308213355284 0.4675946694869145 0.7006791814501224 T T T

0.6775153960504529 0.4460199978867399 0.8510931680781182 T T T

0.9189348955733799 0.6777657517784730 0.8238639209795473 T T T

0.7658613714732551 0.6687932867520860 0.4598859019210707 T T T

0.6118353170048021 0.6728341676581510 0.4889370444093710 T T T

0.5614519408734582 0.6261163144234958 0.7007435301897560 T T T

0.6767952739934474 0.6736750165016172 0.8232844076129620 T T T

**Structure files (CONTCAR) involved in this work:**

|                    |                    |                    |   |   |   |
|--------------------|--------------------|--------------------|---|---|---|
| 0.5792605816883920 | 0.9437164736262482 | 0.3568773955153862 | T | T | T |
| 0.6977525297955789 | 0.9719913546792035 | 0.2117091437979508 | T | T | T |
| 0.7217180308554505 | 0.9383877966089764 | 0.9901430858905407 | T | T | T |
| 0.8820427989146633 | 0.9340559193936776 | 0.9946998153427211 | T | T | T |
| 0.9336900021385944 | 0.9700188693741069 | 0.2052070963940177 | T | T | T |
| 0.8218088931277845 | 0.9453614855396272 | 0.3500356193671564 | T | T | T |
| 0.5794892826780982 | 0.1728867317970153 | 0.3278131534604932 | T | T | T |
| 0.6978669845647341 | 0.1300453627894099 | 0.1910007134590828 | T | T | T |
| 0.7334095386758390 | 0.1707026733848843 | 0.9709560486049816 | T | T | T |
| 0.8882044500885407 | 0.1730119846219356 | 0.9822927032508908 | T | T | T |
| 0.9364713353298907 | 0.1283067266671241 | 0.1970899102117495 | T | T | T |
| 0.8193098152266373 | 0.1736235073465640 | 0.3266232268174296 | T | T | T |
| 0.9240527235768708 | 0.0539170656216527 | 0.8544498218907043 | T | T | T |
| 0.8040082357205466 | 0.0261482491660908 | 0.7056228001358740 | T | T | T |
| 0.7824244285715306 | 0.0661925866973087 | 0.4891643707369698 | T | T | T |
| 0.6217293392173858 | 0.0689951933926177 | 0.4896306163679598 | T | T | T |
| 0.5678100385239758 | 0.0320141715910361 | 0.6989283502693197 | T | T | T |
| 0.6809471045142453 | 0.0547751295314740 | 0.8439093720598480 | T | T | T |
| 0.9228138842985758 | 0.8293031094526927 | 0.8356821420508255 | T | T | T |
| 0.8031697232855051 | 0.8682038114814443 | 0.6923966511774193 | T | T | T |
| 0.7689080594815879 | 0.8263904965701968 | 0.4763728066732731 | T | T | T |
| 0.6141364538515848 | 0.8265579533381904 | 0.4916007961433811 | T | T | T |
| 0.5640890989731669 | 0.8747799096340274 | 0.7000460356684580 | T | T | T |
| 0.6803965264980029 | 0.8322950077687810 | 0.8307362498107775 | T | T | T |
| 0.4233269159170631 | 0.4416999805436737 | 0.6441885108178889 | T | T | T |
| 0.3052859141621339 | 0.4701014425348558 | 0.7902306593716806 | T | T | T |
| 0.2788353033924233 | 0.4401400295583275 | 0.0118743232040226 | T | T | T |
| 0.1213857960146780 | 0.4356930331214209 | 0.0135478431509595 | T | T | T |
| 0.0650875282121384 | 0.4694141405771021 | 0.8014999870566041 | T | T | T |
| 0.1786227555165754 | 0.4419077262895491 | 0.6586626897417439 | T | T | T |
| 0.4183748400158349 | 0.6724753026648237 | 0.6662187155584723 | T | T | T |
| 0.3031918985844869 | 0.6279750633351842 | 0.8057514347244180 | T | T | T |
| 0.2676043156659253 | 0.6697045607093279 | 0.0245107836490044 | T | T | T |
| 0.1135712851568672 | 0.6725586326552399 | 0.0096258122123255 | T | T | T |
| 0.0631620473353588 | 0.6279233287680849 | 0.7979332101258021 | T | T | T |
| 0.1814644808470232 | 0.6689154464651900 | 0.6699571132091435 | T | T | T |
| 0.0795552207217675 | 0.5574404765326070 | 0.1471308550451446 | T | T | T |
| 0.1980049104906202 | 0.5256080598447483 | 0.2897248142801593 | T | T | T |
| 0.2172018545443715 | 0.5593882181126077 | 0.5137211604085240 | T | T | T |
| 0.3768874360533536 | 0.5654566418932504 | 0.5121704317486898 | T | T | T |
| 0.4307912918195548 | 0.5283262705918147 | 0.3018889597983411 | T | T | T |
| 0.3226514964934039 | 0.5559575235207032 | 0.1557327251812989 | T | T | T |
| 0.0863195455563057 | 0.3237780162773791 | 0.1620859225989112 | T | T | T |
| 0.1966561742324857 | 0.3676459363386708 | 0.3077042825652431 | T | T | T |
| 0.2323542967052726 | 0.3289868244009720 | 0.5257883564409206 | T | T | T |
| 0.3863910225517251 | 0.3264891334941449 | 0.5064514364009927 | T | T | T |
| 0.4320027889653634 | 0.3711165839693513 | 0.2929548602130687 | T | T | T |
| 0.3145422846620854 | 0.3286273231292736 | 0.1685744718103178 | T | T | T |
| 0.3577498472128561 | 0.0657674798009407 | 0.7203593051658064 | T | T | T |
| 0.3144436407748936 | 0.0610235123538785 | 0.9057834637016775 | T | T | T |
| 0.2023231585691446 | 0.0461054033989425 | 0.0103708230919401 | T | T | T |
| 0.0939867575821177 | 0.0687959996932055 | 0.8995125965437649 | T | T | T |
| 0.1051208240934955 | 0.0599465997767614 | 0.7024011267912549 | T | T | T |

**Structure files (CONTCAR) involved in this work:**

|                    |                    |                    |   |   |   |
|--------------------|--------------------|--------------------|---|---|---|
| 0.2297943417580318 | 0.0395347597219426 | 0.7578768664397296 | T | T | T |
| 0.3602854257383384 | 0.8256956878995765 | 0.7515231782945246 | T | T | T |
| 0.3062095115276883 | 0.8497169503579562 | 0.9263897636151879 | T | T | T |
| 0.1892062283296784 | 0.8523187140445425 | 0.0183186457458752 | T | T | T |
| 0.0847310177118092 | 0.8311730699080500 | 0.9016130208590485 | T | T | T |
| 0.1052775694773258 | 0.8387807522588270 | 0.7065268620234088 | T | T | T |
| 0.2304797950695456 | 0.8531233528119521 | 0.7644364534895546 | T | T | T |
| 0.3224422124374037 | 0.9485368491319341 | 0.7956340663147603 | T | T | T |
| 0.0873048510514522 | 0.9502252622299299 | 0.8128638197074858 | T | T | T |
| 0.4323264822196267 | 0.1269167935153290 | 0.5851645601007308 | T | T | T |
| 0.4151785427878555 | 0.9953948159869456 | 0.5724247128795549 | T | T | T |
| 0.3965538713283251 | 0.8631008582234786 | 0.5683426640640910 | T | T | T |
| 0.2009079025662962 | 0.1320407326514007 | 0.6216742930183208 | T | T | T |
| 0.1886083227101654 | 0.0023151977149364 | 0.5762062332650721 | T | T | T |
| 0.1986110188230346 | 0.8680354162537087 | 0.5713028442594943 | T | T | T |
| 0.9887694617187752 | 0.0396690475591600 | 0.7844599606856019 | T | T | T |
| 0.9855981591629822 | 0.8672009344911816 | 0.7816187986451524 | T | T | T |
| 0.1437065719059681 | 0.9336822779523345 | 0.2204453138722904 | T | T | T |
| 0.1879907136094851 | 0.9375945374528066 | 0.4053191200377455 | T | T | T |
| 0.2994840803018009 | 0.9459346414501826 | 0.5133288063257264 | T | T | T |
| 0.4078386773903478 | 0.9296000648893655 | 0.4011094563458263 | T | T | T |
| 0.3971681406008118 | 0.9375152926782614 | 0.2043043096120737 | T | T | T |
| 0.2720053626118867 | 0.9593912934488704 | 0.2568712110329057 | T | T | T |
| 0.1405788744352346 | 0.1730363814189646 | 0.2506169678878589 | T | T | T |
| 0.1921547812454076 | 0.1495200294662250 | 0.4265240536609567 | T | T | T |
| 0.3108810436553625 | 0.1465796134642436 | 0.5123041419488300 | T | T | T |
| 0.4166618865426737 | 0.1678334248051909 | 0.3974008448161411 | T | T | T |
| 0.3947790310554494 | 0.1576258766688088 | 0.2032174942156454 | T | T | T |
| 0.2705060431713733 | 0.1470651298740788 | 0.2667198596394900 | T | T | T |
| 0.1795059482019045 | 0.0504426278593733 | 0.2956540370734164 | T | T | T |
| 0.4176932412871683 | 0.0477564498353990 | 0.3121780458783895 | T | T | T |
| 0.0669797696334186 | 0.8703651253402613 | 0.0909049001764788 | T | T | T |
| 0.0852355917073913 | 0.0003414580856687 | 0.0687127266593847 | T | T | T |
| 0.1082408208508824 | 0.1315929730569484 | 0.0686200427448506 | T | T | T |
| 0.3014895722968911 | 0.8659879088015675 | 0.1221196149280680 | T | T | T |
| 0.3154617306997111 | 0.9953401892538682 | 0.0757534630507879 | T | T | T |
| 0.2981562346559356 | 0.1286064841016545 | 0.0728650492894061 | T | T | T |
| 0.5139454314943985 | 0.9552803146980211 | 0.2870517775471128 | T | T | T |
| 0.5161783627662311 | 0.1340505485431700 | 0.2766449754468699 | T | T | T |
| 0.6379965057517043 | 0.5658079231025068 | 0.2747743641897702 | T | T | T |
| 0.6948621447158715 | 0.5734158154162843 | 0.1000489035768942 | T | T | T |
| 0.7958583063763907 | 0.5508321687807720 | 0.9721143844993078 | T | T | T |
| 0.8971368746712403 | 0.5812756891628691 | 0.0969501947016218 | T | T | T |
| 0.8857845033950728 | 0.5422261665728313 | 0.3071940985596717 | T | T | T |
| 0.7613741881619631 | 0.5214979414698684 | 0.2521877726558265 | T | T | T |
| 0.6394187471047131 | 0.3331598249883510 | 0.2594660990923914 | T | T | T |
| 0.6912652160654232 | 0.3390049885747190 | 0.0800235572424833 | T | T | T |
| 0.8103233403844878 | 0.3506415137631271 | 0.9926600814150285 | T | T | T |
| 0.9173951238252652 | 0.3216980806187159 | 0.1028108618870314 | T | T | T |
| 0.9055749817880713 | 0.3568734765362730 | 0.2938492228631467 | T | T | T |
| 0.7655211579735948 | 0.3716979170434419 | 0.2392772263407823 | T | T | T |
| 0.6642079656922837 | 0.4509719322594738 | 0.1771844801556521 | T | T | T |
| 0.9300305652921597 | 0.4492035542570003 | 0.1516640611326305 | T | T | T |

**Structure files (CONTCAR) involved in this work:**

|                    |                    |                    |   |   |   |
|--------------------|--------------------|--------------------|---|---|---|
| 0.5672057561084501 | 0.6268027787753214 | 0.4142262103132648 | T | T | T |
| 0.5948323787637085 | 0.4983176677383362 | 0.4355271137316444 | T | T | T |
| 0.5835792431387685 | 0.3647399492430179 | 0.4360087763402921 | T | T | T |
| 0.7919128354521383 | 0.6303524581824107 | 0.3599234620149581 | T | T | T |
| 0.7956127488255192 | 0.5128464583998672 | 0.4476743989540540 | T | T | T |
| 0.8266359393620186 | 0.3829073379216262 | 0.4360381709587432 | T | T | T |
| 0.0128346153206212 | 0.5559012041822825 | 0.2262749794053709 | T | T | T |
| 0.0229612347840418 | 0.3630107534051982 | 0.2077560757980664 | T | T | T |
| 0.8555025359066807 | 0.4366491171436350 | 0.7851145590081212 | T | T | T |
| 0.7957876264381526 | 0.4350196472836526 | 0.6085794013148509 | T | T | T |
| 0.6997119787441266 | 0.4209875535443378 | 0.4708171454346685 | T | T | T |
| 0.6011248779147554 | 0.4294512545309108 | 0.6046378873634858 | T | T | T |
| 0.6038444083886065 | 0.4397411172310225 | 0.8016355226169790 | T | T | T |
| 0.7283186253208329 | 0.4754445857062536 | 0.7661942048877015 | T | T | T |
| 0.8639918944579846 | 0.6837518024988499 | 0.7378917661574058 | T | T | T |
| 0.8139777082644323 | 0.6432122861736943 | 0.5527852536317065 | T | T | T |
| 0.6894895415524448 | 0.6473054597632359 | 0.4862129756513842 | T | T | T |
| 0.5831121878114091 | 0.6674643924674674 | 0.6012806304460266 | T | T | T |
| 0.5980590166767561 | 0.6585545702150963 | 0.7976211322103834 | T | T | T |
| 0.7217295495451185 | 0.6523363345686293 | 0.7284755640095613 | T | T | T |
| 0.8259838965166632 | 0.5506660934356190 | 0.6892273450328446 | T | T | T |
| 0.5816980808393462 | 0.5476183219311007 | 0.6874751847137637 | T | T | T |
| 0.9307344379670536 | 0.3767367112290507 | 0.9207635417193616 | T | T | T |
| 0.9164776543882627 | 0.5101015591122751 | 0.9288186375051819 | T | T | T |
| 0.8895951914208741 | 0.6399510397856579 | 0.9219910848133442 | T | T | T |
| 0.7007482966016756 | 0.3723220914290402 | 0.8877108859175384 | T | T | T |
| 0.6755063448251616 | 0.4995615046810726 | 0.9423288127010900 | T | T | T |
| 0.6964000350326797 | 0.6326770535632844 | 0.9242864211296778 | T | T | T |
| 0.4896171333762460 | 0.4512868017104689 | 0.7118850171720438 | T | T | T |
| 0.4808360502123951 | 0.6319059241379346 | 0.7150984780656624 | T | T | T |
| 0.6445173537544245 | 0.9362943691602581 | 0.2860903622060721 | T | T | T |
| 0.6959894828654912 | 0.9337468273520996 | 0.1047770162757282 | T | T | T |
| 0.8023251552328965 | 0.9466015401966678 | 0.9852135267577262 | T | T | T |
| 0.9043057046354336 | 0.9279908350974189 | 0.1107268805472883 | T | T | T |
| 0.8978061746265285 | 0.9457024511329565 | 0.3077012339273926 | T | T | T |
| 0.7722420143613372 | 0.9650842552815690 | 0.2584489722111301 | T | T | T |
| 0.6415093007479631 | 0.1727950790169447 | 0.2503693144711866 | T | T | T |
| 0.6957937336745732 | 0.1538444065314606 | 0.0752790916026688 | T | T | T |
| 0.8110855436904317 | 0.1470299106879689 | 0.9796294157790051 | T | T | T |
| 0.9160116765777829 | 0.1677514378572899 | 0.0955516245628973 | T | T | T |
| 0.8965711066608271 | 0.1584443169658415 | 0.2923866973229393 | T | T | T |
| 0.7713804945175629 | 0.1426300447391767 | 0.2381748857912233 | T | T | T |
| 0.6785754857931657 | 0.0507325858112146 | 0.1989152257761328 | T | T | T |
| 0.9197079125293340 | 0.0489737193896089 | 0.1839007751929696 | T | T | T |
| 0.5694333169435047 | 0.8747271032182475 | 0.4204099381474461 | T | T | T |
| 0.5856573299271013 | 0.0057396439544800 | 0.4350655750220304 | T | T | T |
| 0.6008958404475934 | 0.1378377944268101 | 0.4327460580277125 | T | T | T |
| 0.8059648348226732 | 0.8703278426589868 | 0.3912863094606909 | T | T | T |
| 0.8153699177086038 | 0.9990566760751474 | 0.4404231226318030 | T | T | T |
| 0.8050418364594466 | 0.1334498133708119 | 0.4309348863570281 | T | T | T |
| 0.0130440518632404 | 0.9552194207498307 | 0.2200597637301088 | T | T | T |
| 0.0164123936219191 | 0.1373036170807256 | 0.2155703112947864 | T | T | T |
| 0.8578743313169922 | 0.0543663023089683 | 0.7852599912659538 | T | T | T |

**Structure files (CONTCAR) involved in this work:**

|                    |                    |                    |   |   |   |
|--------------------|--------------------|--------------------|---|---|---|
| 0.8078402149282549 | 0.0710733072247734 | 0.6044906089989289 | T | T | T |
| 0.7016962723288446 | 0.0577220450472355 | 0.4853578769637289 | T | T | T |
| 0.5963691697767867 | 0.0748970634160108 | 0.6045532123520803 | T | T | T |
| 0.6049353564348338 | 0.0533150047624919 | 0.8018468050210513 | T | T | T |
| 0.7296111557776404 | 0.0314342094382386 | 0.7531238265785440 | T | T | T |
| 0.8590522443746471 | 0.8335383706781936 | 0.7620754256467706 | T | T | T |
| 0.8065788860663066 | 0.8326715332740521 | 0.5832689964261142 | T | T | T |
| 0.6917782843053730 | 0.8511575839031219 | 0.4876548507201223 | T | T | T |
| 0.5875437344316382 | 0.8288722516689573 | 0.6059201680799188 | T | T | T |
| 0.6040699137609783 | 0.8520125270950559 | 0.8000206918812431 | T | T | T |
| 0.7293707384609056 | 0.8568260183465584 | 0.7402535713089533 | T | T | T |
| 0.8189809565452597 | 0.9477722025524266 | 0.6799501986479011 | T | T | T |
| 0.5796456715053622 | 0.9528495687702345 | 0.6742003046486674 | T | T | T |
| 0.9327652681391887 | 0.1267719445570093 | 0.9076624035149805 | T | T | T |
| 0.9202389606091164 | 0.9965782322054084 | 0.9410999859598685 | T | T | T |
| 0.9039131876684194 | 0.8642207889654804 | 0.9416160409382377 | T | T | T |
| 0.6979833867003645 | 0.1306015466210932 | 0.8797480526428311 | T | T | T |
| 0.6878102424309896 | 0.0037907052815194 | 0.9381535703398114 | T | T | T |
| 0.7000303470927969 | 0.8696784626677974 | 0.9342234194697293 | T | T | T |
| 0.4888828890497435 | 0.0469279093162226 | 0.7170626717567544 | T | T | T |
| 0.4845662310315880 | 0.8641359427081625 | 0.7193850549184641 | T | T | T |
| 0.3584124132615522 | 0.4337231475893100 | 0.7164285079789922 | T | T | T |
| 0.3070103915977327 | 0.4333213593516750 | 0.8986079916545727 | T | T | T |
| 0.1993205598696796 | 0.4590755949940687 | 0.0122204433653134 | T | T | T |
| 0.0913668694105576 | 0.4317983105125882 | 0.9017479085360386 | T | T | T |
| 0.1032970823830541 | 0.4403021788714683 | 0.7034974430560270 | T | T | T |
| 0.2298246524504567 | 0.4642608698659806 | 0.7465783494961289 | T | T | T |
| 0.3567920324652508 | 0.6725372019800767 | 0.7448400676167647 | T | T | T |
| 0.3053424208208093 | 0.6521626938834089 | 0.9209402186377521 | T | T | T |
| 0.1900625410607096 | 0.6452995365431562 | 0.0155947052101115 | T | T | T |
| 0.0868166751851516 | 0.6696492467376056 | 0.8961022495716950 | T | T | T |
| 0.1037902573262033 | 0.6566578759391991 | 0.7012885947319677 | T | T | T |
| 0.2287579879903821 | 0.6392941609040490 | 0.7591067079538835 | T | T | T |
| 0.3242085643014199 | 0.5492500756678329 | 0.7993231870306134 | T | T | T |
| 0.0809703388693645 | 0.5490226125668426 | 0.8139427803826670 | T | T | T |
| 0.4322716126658210 | 0.3745783259092332 | 0.5762911744474412 | T | T | T |
| 0.4166611073836597 | 0.5061010027929014 | 0.5700183823050005 | T | T | T |
| 0.3939846954077204 | 0.6375746706325724 | 0.5623636938859674 | T | T | T |
| 0.1973358847324952 | 0.3674409699404254 | 0.6188254835429300 | T | T | T |
| 0.1805881753480943 | 0.4959872363267405 | 0.5672435385729145 | T | T | T |
| 0.1959274435758060 | 0.6300197348614963 | 0.5651837774768131 | T | T | T |
| 0.9860349678829335 | 0.4551287522254556 | 0.7837004735561433 | T | T | T |
| 0.9839251222826113 | 0.6367369659118485 | 0.7796737449617772 | T | T | T |
| 0.1453724435573963 | 0.5641687769598246 | 0.2161191653455474 | T | T | T |
| 0.1919155955218706 | 0.5614242112758822 | 0.3981500626473677 | T | T | T |
| 0.2973836081619157 | 0.5492994816402760 | 0.5198573040469552 | T | T | T |
| 0.4000121979030095 | 0.5689904025776432 | 0.3965301831689233 | T | T | T |
| 0.3980581439566498 | 0.5574995004763776 | 0.1994620585053667 | T | T | T |
| 0.2728688876351844 | 0.5339403645094980 | 0.2466450350501174 | T | T | T |
| 0.1440946818622709 | 0.3219400404812640 | 0.2469750671170663 | T | T | T |
| 0.1921143519712591 | 0.3482287661229270 | 0.4245870544738704 | T | T | T |
| 0.3095157471773282 | 0.3532464510837231 | 0.5138264108673526 | T | T | T |
| 0.4107477484775435 | 0.3276814138722097 | 0.3908850264679016 | T | T | T |

**Structure files (CONTCAR) involved in this work:**

|                    |                    |                    |   |   |   |
|--------------------|--------------------|--------------------|---|---|---|
| 0.3923246275666826 | 0.3443826571530528 | 0.1943924527060991 | T | T | T |
| 0.2714186029746761 | 0.3530680157918122 | 0.2656729502254783 | T | T | T |
| 0.1774428770088577 | 0.4468615597066449 | 0.2938860892773871 | T | T | T |
| 0.4130450915217202 | 0.4491522967667066 | 0.3147856572273026 | T | T | T |
| 0.0682164161105199 | 0.6242970560136442 | 0.0812274051110221 | T | T | T |
| 0.0785715008914568 | 0.4905387205571099 | 0.0797178125241002 | T | T | T |
| 0.1146705344283955 | 0.3620100803522816 | 0.0630469401704397 | T | T | T |
| 0.3031118997138535 | 0.6303133686052063 | 0.1161587343681281 | T | T | T |
| 0.3183919906809596 | 0.5015193480094503 | 0.0656337139598576 | T | T | T |
| 0.2910443734629815 | 0.3694388569602803 | 0.0693568484441209 | T | T | T |
| 0.5106060787549529 | 0.5385513259236502 | 0.2935324408132395 | T | T | T |
| 0.5110616677515624 | 0.3621769499052573 | 0.2706435311830786 | T | T | T |
| 0.4394316554495391 | 0.7493302465633467 | 0.6421505397276741 | T | T | T |
| 0.1958625353700276 | 0.7480342791475746 | 0.6516798773567601 | T | T | T |
| 0.2716987780221372 | 0.7491110640077274 | 0.0473241844519441 | T | T | T |
| 0.1080611074523977 | 0.7484351804678078 | 0.0518610507183381 | T | T | T |
| 0.0667855843510670 | 0.2478378326752912 | 0.1308857798091045 | T | T | T |
| 0.3040497937511438 | 0.2492604965650101 | 0.1474523257480262 | T | T | T |
| 0.2282529391487971 | 0.2494335294666723 | 0.5472443959760639 | T | T | T |
| 0.3920536341455381 | 0.2501375558923791 | 0.5477352269403190 | T | T | T |
| 0.5578436709513055 | 0.2494650672606501 | 0.3525693065989687 | T | T | T |
| 0.8069384869241908 | 0.2519182514825042 | 0.3427301630914523 | T | T | T |
| 0.7282626569175602 | 0.2498450941072503 | 0.9442997285037142 | T | T | T |
| 0.8929174014004728 | 0.2501596962703478 | 0.9431036951071180 | T | T | T |
| 0.9437102453134915 | 0.7522528792401965 | 0.8586646635101594 | T | T | T |
| 0.6863333445213555 | 0.7526363910583377 | 0.8499818670407816 | T | T | T |
| 0.7723531925012727 | 0.7484128302378823 | 0.4410535809564106 | T | T | T |
| 0.6076395658446025 | 0.7500212708645181 | 0.4509163811919846 | T | T | T |
| 0.9355369044417076 | 0.4960633178680274 | 0.5120119929967359 | T | T | T |
| 0.8211939926977043 | 0.3356681200040076 | 0.3218379949337494 | T | T | T |
| 0.8009141922488549 | 0.6376349029418564 | 0.6866429154488297 | T | T | T |
| 0.9239242680699433 | 0.5299931565635496 | 0.1919792865048104 | T | T | T |
| 0.8678249721167001 | 0.5569030089986738 | 0.5485016386517748 | T | T | T |
| 0.9352910560098572 | 0.4034652459548690 | 0.4319414310958542 | T | T | T |
| 0.9836289151561340 | 0.6432749398709808 | 0.3035343221102370 | T | T | T |
| 1.0000760653377390 | 0.5700944936064709 | 0.3796599719140678 | T | T | T |
| 0.0683769361597531 | 0.6167517749364358 | 0.3254620787028024 | T | T | T |
| 0.9667826107485583 | 0.4867585589374576 | 0.5664904187587654 | T | T | T |
| 0.0635914222473790 | 0.4167825771913442 | 0.4659832580050802 | T | T | T |
| 0.0448512583980627 | 0.3283869031352243 | 0.4552414873424386 | T | T | T |
| 0.0166868838801279 | 0.6001251180106396 | 0.3156971201939427 | T | T | T |
| 0.0233503631801407 | 0.3793083755693046 | 0.4568134511155048 | T | T | T |

**Figure S17 ZnFe-TS**

Si O Al Zn Fe H C

1.0000000000000000

20.0219999999999985 0.0000000000000000 0.0000000000000000

0.0000000000000000 19.8990000000000009 0.0000000000000000

0.0000000000000000 0.0000000000000000 13.3829999999999991

93 193 3 1 1 6 2

Selective dynamics

Direct

0.4227591374173915 0.0579996186531521 0.6484522498002492 T T T

0.3060199280618564 0.0281059675501332 0.7946629240586249 T T T

**Structure files (CONTCAR) involved in this work:**

|                    |                    |                    |   |   |   |
|--------------------|--------------------|--------------------|---|---|---|
| 0.2822549904871323 | 0.0571802422326229 | 0.0163600259142634 | T | T | T |
| 0.1228669245932005 | 0.0606803666645862 | 0.0113146716616249 | T | T | T |
| 0.0684832567172569 | 0.0287850233053191 | 0.8002440822672450 | T | T | T |
| 0.1816018212678177 | 0.0582032321878515 | 0.6632938791584185 | T | T | T |
| 0.4205098374529984 | 0.8264000929371270 | 0.6708325714425740 | T | T | T |
| 0.3042471795159275 | 0.8691333594579884 | 0.8091881668673920 | T | T | T |
| 0.2671485786130219 | 0.8285523094342578 | 0.0281747463115735 | T | T | T |
| 0.1124583216915609 | 0.8249002287093038 | 0.0157745880231683 | T | T | T |
| 0.0659470775351844 | 0.8716252429755066 | 0.8015383280355051 | T | T | T |
| 0.1824246405086881 | 0.8267907693044579 | 0.6729161953349251 | T | T | T |
| 0.0776603264239675 | 0.9400995283477572 | 0.1501956619603330 | T | T | T |
| 0.1956964246231235 | 0.9705296054120738 | 0.2945873792199618 | T | T | T |
| 0.2186629441019857 | 0.9381691165622600 | 0.5169189436164894 | T | T | T |
| 0.3789943410793605 | 0.9335823370223520 | 0.5139326231210244 | T | T | T |
| 0.4344785351677795 | 0.9675171721280591 | 0.3025219834281681 | T | T | T |
| 0.3209081958724169 | 0.9393211035557458 | 0.1641052632141013 | T | T | T |
| 0.0827451210783117 | 0.1718358473935168 | 0.1652151898961950 | T | T | T |
| 0.1961316475427208 | 0.1297079324986476 | 0.3085846235549106 | T | T | T |
| 0.2329592537203947 | 0.1695857686563552 | 0.5257286518501783 | T | T | T |
| 0.3875204187721571 | 0.1726745773420438 | 0.5100133747981511 | T | T | T |
| 0.4362123692078170 | 0.1259825829351903 | 0.2975514627885022 | T | T | T |
| 0.3171453471309770 | 0.1697832893887787 | 0.1718570153312037 | T | T | T |
| 0.5794791061363325 | 0.5552761647492436 | 0.3537238622104860 | T | T | T |
| 0.6899288635356871 | 0.5284402912839259 | 0.1981137372530912 | T | T | T |
| 0.7164232294771383 | 0.5643119226495762 | 0.9812043357615432 | T | T | T |
| 0.8742860680772827 | 0.5699088383113361 | 0.9858525416740763 | T | T | T |
| 0.8117342037473042 | 0.5486704129956514 | 0.3396446544802353 | T | T | T |
| 0.5737629393070904 | 0.3277140994887799 | 0.3292456940163295 | T | T | T |
| 0.6945704431149333 | 0.3739521705170889 | 0.1937242756239613 | T | T | T |
| 0.7319304073587096 | 0.3270306906545440 | 0.9788786133385280 | T | T | T |
| 0.8862051454459049 | 0.3242538440190687 | 0.9875370749139754 | T | T | T |
| 0.9406161524151597 | 0.3735137446630492 | 0.1817194053997013 | T | T | T |
| 0.9220129776897250 | 0.4450563545147620 | 0.8590490640091263 | T | T | T |
| 0.8003669237910743 | 0.4731373801016055 | 0.7197266253566406 | T | T | T |
| 0.7786466223381452 | 0.4344717595544370 | 0.4941277705012657 | T | T | T |
| 0.6213445106778630 | 0.4275265651991275 | 0.4875744823764677 | T | T | T |
| 0.5681638955855123 | 0.4674692135279734 | 0.7004382534237292 | T | T | T |
| 0.6747380060222721 | 0.4440727269073020 | 0.8526037040114455 | T | T | T |
| 0.9194980828906800 | 0.6771972182350008 | 0.8274334344794647 | T | T | T |
| 0.7684734735225299 | 0.6676667380770978 | 0.4600278160174660 | T | T | T |
| 0.6133848274056182 | 0.6714876924523050 | 0.4875407372017646 | T | T | T |
| 0.5619246862917808 | 0.6260338172810472 | 0.7003780005517806 | T | T | T |
| 0.6752795509429176 | 0.6752233444497523 | 0.8242946091938603 | T | T | T |
| 0.5792958191609663 | 0.9431787183142668 | 0.3578357877784332 | T | T | T |
| 0.6980919346219444 | 0.9720526912279713 | 0.2137748368364685 | T | T | T |
| 0.7215673928417817 | 0.9394460431750550 | 0.9912427984953417 | T | T | T |
| 0.8818359719616593 | 0.9343017649678422 | 0.9954315723665002 | T | T | T |
| 0.9337701542799749 | 0.9702804908139778 | 0.2060011319175606 | T | T | T |
| 0.8223754854298753 | 0.9443548564326510 | 0.3511948802819135 | T | T | T |
| 0.5791638963090999 | 0.1730064099893188 | 0.3275404884450225 | T | T | T |
| 0.6978824218852240 | 0.1304851557233883 | 0.1922338762633313 | T | T | T |
| 0.7331565633275332 | 0.1694921827634512 | 0.9711544704136680 | T | T | T |
| 0.8878460803412802 | 0.1721820403011012 | 0.9810275892416990 | T | T | T |



**Structure files (CONTCAR) involved in this work:**

|                    |                    |                    |   |   |   |
|--------------------|--------------------|--------------------|---|---|---|
| 0.9365526783312905 | 0.1288151495421883 | 0.1964428087794387 | T | T | T |
| 0.8201418173109580 | 0.1740551321273812 | 0.3280581987521071 | T | T | T |
| 0.9242918407135603 | 0.0533070174508517 | 0.8542066748843797 | T | T | T |
| 0.8038517580619219 | 0.0255087178507656 | 0.7063229152313953 | T | T | T |
| 0.7826802545067311 | 0.0651868727773796 | 0.4894878169307745 | T | T | T |
| 0.6219527348697984 | 0.0690094868955004 | 0.4892097351474399 | T | T | T |
| 0.5678847757109806 | 0.0319881545361364 | 0.6978591320588600 | T | T | T |
| 0.6804596904253153 | 0.0547556782194383 | 0.8439498994278726 | T | T | T |
| 0.9230417293073583 | 0.8288985954778945 | 0.8376059509814189 | T | T | T |
| 0.8033618101394617 | 0.8672832208101217 | 0.6939930945673904 | T | T | T |
| 0.7700137736829505 | 0.8252919681706430 | 0.4772629693994521 | T | T | T |
| 0.6147906228195690 | 0.8254905705576463 | 0.4921088763816575 | T | T | T |
| 0.5642932138038225 | 0.8751578748105733 | 0.6992739197784610 | T | T | T |
| 0.6797064209061084 | 0.8330239225827327 | 0.8325161606000121 | T | T | T |
| 0.4233662117617132 | 0.4425120241682284 | 0.6394219271679759 | T | T | T |
| 0.3055930515110608 | 0.4698826033285797 | 0.7868360772185801 | T | T | T |
| 0.2822969509865738 | 0.4385752082211588 | 0.0068294222848462 | T | T | T |
| 0.1248712887383778 | 0.4352584726967534 | 0.0076944184318034 | T | T | T |
| 0.0657487559631798 | 0.4693489865421137 | 0.7992895025282166 | T | T | T |
| 0.1787133991933441 | 0.4426877173175769 | 0.6557991388179424 | T | T | T |
| 0.4189260618212503 | 0.6726512480260377 | 0.6634513674000853 | T | T | T |
| 0.3028578603614486 | 0.6278578560656196 | 0.8028266708211085 | T | T | T |
| 0.2685533214136360 | 0.6693411855642387 | 0.0223021075603253 | T | T | T |
| 0.1140437184269090 | 0.6709576656179426 | 0.0103110683706532 | T | T | T |
| 0.0636727328952211 | 0.6279720700151868 | 0.7983791751611194 | T | T | T |
| 0.1806783817979018 | 0.6685262593611009 | 0.6677663108568492 | T | T | T |
| 0.0767712939132671 | 0.5551114107288500 | 0.1470815813075525 | T | T | T |
| 0.1986492666781637 | 0.5265908147584913 | 0.2853230750382033 | T | T | T |
| 0.2186244422775862 | 0.5601363522678792 | 0.5110964954760628 | T | T | T |
| 0.3779055980119570 | 0.5665317002600628 | 0.5092660141634204 | T | T | T |
| 0.4307893175573314 | 0.5271773403243087 | 0.3007857819198225 | T | T | T |
| 0.3246157021589384 | 0.5546833260849910 | 0.1514171203507777 | T | T | T |
| 0.0865497407932844 | 0.3246028181228870 | 0.1557799653770221 | T | T | T |
| 0.1964337232792411 | 0.3679590200914399 | 0.3051067331030960 | T | T | T |
| 0.2315321042835622 | 0.3288209452104017 | 0.5237368186685982 | T | T | T |
| 0.3855859066906347 | 0.3260909479155504 | 0.5050119664706817 | T | T | T |
| 0.4314104344420292 | 0.3705061815354053 | 0.2927071292339025 | T | T | T |
| 0.3151787612787690 | 0.3277896481057172 | 0.1656883542362979 | T | T | T |
| 0.3577703724602803 | 0.0654950509587623 | 0.7200058433790122 | T | T | T |
| 0.3145523495194141 | 0.0601299285887409 | 0.9052743454860068 | T | T | T |
| 0.2023006247130444 | 0.0450645918346331 | 0.0094879763907423 | T | T | T |
| 0.0937225612937148 | 0.0685484780029499 | 0.8992168160395425 | T | T | T |
| 0.1049205605834401 | 0.0597132990753677 | 0.7021682906405174 | T | T | T |
| 0.2297175023953794 | 0.0397435613096895 | 0.7573207227713673 | T | T | T |
| 0.3608880492634532 | 0.8251974613218070 | 0.7528326779546537 | T | T | T |
| 0.3057350523132538 | 0.8502092433801428 | 0.9266038437506949 | T | T | T |
| 0.1893721430937386 | 0.8516317885512229 | 0.0199321701334974 | T | T | T |
| 0.0855307340932587 | 0.8307968169184685 | 0.9021721562587832 | T | T | T |
| 0.1051144322878708 | 0.8384606349851296 | 0.7067452678698006 | T | T | T |
| 0.2307101477331245 | 0.8521592936634901 | 0.7635767790939124 | T | T | T |
| 0.3219900149576846 | 0.9480697570260069 | 0.7941031011264947 | T | T | T |
| 0.0878280606411090 | 0.9498087827498953 | 0.8128696002074779 | T | T | T |
| 0.4320069190235602 | 0.1269333565592384 | 0.5848306199411236 | T | T | T |

**Structure files (CONTCAR) involved in this work:**

|                    |                    |                    |   |   |   |
|--------------------|--------------------|--------------------|---|---|---|
| 0.4150638633833347 | 0.9953278135614601 | 0.5716440948306708 | T | T | T |
| 0.3956258097762941 | 0.8630692589373921 | 0.5691320923810758 | T | T | T |
| 0.2002888564446448 | 0.1321002162886057 | 0.6210746548294316 | T | T | T |
| 0.1883020001380011 | 0.0023593829920383 | 0.5757953206195632 | T | T | T |
| 0.1981708462971301 | 0.8681270177726954 | 0.5710341797698295 | T | T | T |
| 0.9887842358861066 | 0.0386862694758682 | 0.7840864718989178 | T | T | T |
| 0.9857893806652641 | 0.8668860867246611 | 0.7836853141124387 | T | T | T |
| 0.1435833578506858 | 0.9336010426890005 | 0.2200892154878860 | T | T | T |
| 0.1877213653685867 | 0.9378958128979031 | 0.4049277254723767 | T | T | T |
| 0.2991225575646702 | 0.9460516166382853 | 0.5130042043474076 | T | T | T |
| 0.4075703220531292 | 0.9286431399377885 | 0.4012644295163070 | T | T | T |
| 0.3972524735483153 | 0.9375077849683785 | 0.2044822138227981 | T | T | T |
| 0.2719257502968460 | 0.9593211386771731 | 0.2565844967170831 | T | T | T |
| 0.1406459779076098 | 0.1735084430640114 | 0.2498940117321338 | T | T | T |
| 0.1920085368845383 | 0.1493718010962747 | 0.4257040621117179 | T | T | T |
| 0.3104037577844970 | 0.1465388033001286 | 0.5122837051182260 | T | T | T |
| 0.4160917731726975 | 0.1677904128290921 | 0.3972279586955476 | T | T | T |
| 0.3947377433905687 | 0.1564501244758989 | 0.2028899980086360 | T | T | T |
| 0.2704050619318171 | 0.1470960990781704 | 0.2659807573924005 | T | T | T |
| 0.1793034113692719 | 0.0505108456575147 | 0.2944797204806862 | T | T | T |
| 0.4178638073396346 | 0.0472400396895733 | 0.3135922962580893 | T | T | T |
| 0.0669096460093684 | 0.8695139487604587 | 0.0911009920603297 | T | T | T |
| 0.0850104714540419 | 0.9995605519251974 | 0.0678118260631489 | T | T | T |
| 0.1087488184405432 | 0.1307733330078925 | 0.0684021283287350 | T | T | T |
| 0.3020082768745588 | 0.8652497928186605 | 0.1226647148674360 | T | T | T |
| 0.3155033263862769 | 0.9944783280960617 | 0.0753221289001745 | T | T | T |
| 0.2980560442204404 | 0.1275968778640141 | 0.0723019404950935 | T | T | T |
| 0.5139269427471965 | 0.9545734773563412 | 0.2881256069080766 | T | T | T |
| 0.5158869152437211 | 0.1338914661213166 | 0.2770658321935790 | T | T | T |
| 0.6377421593038256 | 0.5664348868685873 | 0.2714788885552888 | T | T | T |
| 0.6959655641827879 | 0.5734203168523606 | 0.0979637274502165 | T | T | T |
| 0.7956752095292269 | 0.5495415470392432 | 0.9675543890626883 | T | T | T |
| 0.8914733958575162 | 0.5796180355374271 | 0.1020291196663519 | T | T | T |
| 0.8883439887570939 | 0.5264417741570566 | 0.3142467955026641 | T | T | T |
| 0.7629782096950750 | 0.5252837033951873 | 0.2519454242200906 | T | T | T |
| 0.6396422939290763 | 0.3344702565986202 | 0.2612661982827197 | T | T | T |
| 0.6948973281610136 | 0.3374562977621842 | 0.0849441662958673 | T | T | T |
| 0.8095263164469014 | 0.3513178271455361 | 0.9854906598525927 | T | T | T |
| 0.9119821436852470 | 0.3183820474857217 | 0.1026264186700042 | T | T | T |
| 0.9075275386259303 | 0.3595027742691339 | 0.2930555529679885 | T | T | T |
| 0.7665569600697012 | 0.3719496919158247 | 0.2458265487454881 | T | T | T |
| 0.6677189858370709 | 0.4513439125100656 | 0.1778067771183669 | T | T | T |
| 0.9219383046532603 | 0.4472953952716578 | 0.1461008305268101 | T | T | T |
| 0.5679155907867548 | 0.6250496330819819 | 0.4144179578067050 | T | T | T |
| 0.6015660937938837 | 0.4973521900856788 | 0.4328002192222531 | T | T | T |
| 0.5835045776288296 | 0.3644158512934220 | 0.4372567810317265 | T | T | T |
| 0.8015278418831411 | 0.6284768104894144 | 0.3642774726481590 | T | T | T |
| 0.7933409538717683 | 0.5124340161557903 | 0.4504249676138113 | T | T | T |
| 0.8313323183237329 | 0.3861237648693867 | 0.4370804727936473 | T | T | T |
| 0.0121432372531455 | 0.5464504979546875 | 0.2168377736253934 | T | T | T |
| 0.0209591943432047 | 0.3638308106502252 | 0.1950924913554305 | T | T | T |
| 0.8560649148820594 | 0.4366989275835105 | 0.7881410134471738 | T | T | T |
| 0.7974176774410510 | 0.4354212394771373 | 0.6114747051443752 | T | T | T |

**Structure files (CONTCAR) involved in this work:**

|                    |                    |                    |   |   |   |
|--------------------|--------------------|--------------------|---|---|---|
| 0.7018007716844303 | 0.4153198863881191 | 0.4745189044138507 | T | T | T |
| 0.6019508749205146 | 0.4303081889930664 | 0.6045578065889877 | T | T | T |
| 0.6013927614681236 | 0.4385292430629735 | 0.8021554046886678 | T | T | T |
| 0.7267993035027578 | 0.4702323484399099 | 0.7671850645582285 | T | T | T |
| 0.8639661584299687 | 0.6833305397315337 | 0.7419744546309682 | T | T | T |
| 0.8130697538697552 | 0.6429156462242298 | 0.5574808892779117 | T | T | T |
| 0.6912387729036912 | 0.6459000151823193 | 0.4795377718574101 | T | T | T |
| 0.5862991566877311 | 0.6657615691651686 | 0.6007520419674457 | T | T | T |
| 0.5968537883122578 | 0.6594426745649267 | 0.7979801530777130 | T | T | T |
| 0.7201402834373019 | 0.6565901563305520 | 0.7280547137437786 | T | T | T |
| 0.8222824256210687 | 0.5510796134226411 | 0.6964141537044444 | T | T | T |
| 0.5822740633571349 | 0.5474052141593131 | 0.6896979140636607 | T | T | T |
| 0.9319423108207102 | 0.3757624307434886 | 0.9220735047805219 | T | T | T |
| 0.9175327332691670 | 0.5094809307309173 | 0.9321791294266598 | T | T | T |
| 0.8908707781375531 | 0.6388971728672624 | 0.9255864938820897 | T | T | T |
| 0.6951234134310015 | 0.3703186852769611 | 0.8922462292233226 | T | T | T |
| 0.6742492752046765 | 0.4994791720720845 | 0.9412458252920933 | T | T | T |
| 0.6963741753454475 | 0.6321855818783307 | 0.9224974866075404 | T | T | T |
| 0.4889736956531376 | 0.4513613008322663 | 0.7088149567130859 | T | T | T |
| 0.4812795876770813 | 0.6318746567496726 | 0.7122973405805140 | T | T | T |
| 0.6445682099177575 | 0.9358307100559979 | 0.2870208198904864 | T | T | T |
| 0.6960468302712325 | 0.9350963434803844 | 0.1059412799148311 | T | T | T |
| 0.8021592658971574 | 0.9473226077090284 | 0.9855228213323342 | T | T | T |
| 0.9036281482359706 | 0.9287266772085001 | 0.1116453336538797 | T | T | T |
| 0.8982610305899709 | 0.9456475785131097 | 0.3086876505724797 | T | T | T |
| 0.7725725358963286 | 0.9641337392847513 | 0.2599950869918701 | T | T | T |
| 0.6407793871296006 | 0.1736101171327979 | 0.2492908623501979 | T | T | T |
| 0.6960218220650535 | 0.1515145989159301 | 0.0753841703919261 | T | T | T |
| 0.8108674324563759 | 0.1456921930273579 | 0.9783341383354639 | T | T | T |
| 0.9153925843438238 | 0.1674276705803820 | 0.0944652074742567 | T | T | T |
| 0.8969630764591932 | 0.1597004114243709 | 0.2915577549886882 | T | T | T |
| 0.7709777439512417 | 0.1458580169131166 | 0.2392630015654321 | T | T | T |
| 0.6796403537417650 | 0.0511713044640292 | 0.2037971331488901 | T | T | T |
| 0.9197090689418341 | 0.0493958321283279 | 0.1856759432276358 | T | T | T |
| 0.5701482181443335 | 0.8740958285809477 | 0.4214644496410042 | T | T | T |
| 0.5856266975321317 | 0.0055597013637704 | 0.4355182686585000 | T | T | T |
| 0.6013659698590708 | 0.1378353218516251 | 0.4320187865075670 | T | T | T |
| 0.8069846011287799 | 0.8691423244554063 | 0.3920704705777090 | T | T | T |
| 0.8153437467187551 | 0.9975216831216094 | 0.4421932869137005 | T | T | T |
| 0.8063116961392214 | 0.1318966660848023 | 0.4306269823548786 | T | T | T |
| 0.0130922865444642 | 0.9553310526054872 | 0.2196117571415665 | T | T | T |
| 0.0164066633133559 | 0.1384623000777894 | 0.2141644498969071 | T | T | T |
| 0.8579314211690565 | 0.0539942258714590 | 0.7853544689121045 | T | T | T |
| 0.8075662916715992 | 0.0703215816707190 | 0.6050047345369514 | T | T | T |
| 0.7019328642685592 | 0.0576325411881747 | 0.4844804936341405 | T | T | T |
| 0.5968690576546083 | 0.0754254759867603 | 0.6042578409002921 | T | T | T |
| 0.6046239654784933 | 0.0526065279685433 | 0.8014230071127995 | T | T | T |
| 0.7294717927746462 | 0.0312184600364605 | 0.7537361837745726 | T | T | T |
| 0.8595125291943045 | 0.8328951431008133 | 0.7633374954103808 | T | T | T |
| 0.8069314345125338 | 0.8319568548668473 | 0.5846372092762938 | T | T | T |
| 0.6926484417545079 | 0.8493723846948517 | 0.4876942948878285 | T | T | T |
| 0.5883791600677819 | 0.8281150446611053 | 0.6065904787676001 | T | T | T |
| 0.6039478326476997 | 0.8536390427334306 | 0.8001675882933953 | T | T | T |

**Structure files (CONTCAR) involved in this work:**

|                    |                    |                    |   |   |   |
|--------------------|--------------------|--------------------|---|---|---|
| 0.7296863459225845 | 0.8552821848520201 | 0.7419723635295086 | T | T | T |
| 0.8186208893041297 | 0.9469863692042902 | 0.6816364785962302 | T | T | T |
| 0.5798512175476447 | 0.9530114683964338 | 0.6716889491095960 | T | T | T |
| 0.9330811783014608 | 0.1263802129912921 | 0.9068439212541712 | T | T | T |
| 0.9203983387663817 | 0.9964501629541007 | 0.9414713762536444 | T | T | T |
| 0.9034372050403451 | 0.8642332848683024 | 0.9429983739965450 | T | T | T |
| 0.6970836679296283 | 0.1308580813462878 | 0.8791209068135194 | T | T | T |
| 0.6874820950560847 | 0.0047262672232251 | 0.9392187789604036 | T | T | T |
| 0.6993282556462302 | 0.8709456620908899 | 0.9354284162691967 | T | T | T |
| 0.4889897842451520 | 0.0468383344791406 | 0.7159285426441155 | T | T | T |
| 0.4847600138088757 | 0.8648019517250352 | 0.7184164566699419 | T | T | T |
| 0.3574282991047446 | 0.4352298444537662 | 0.7092932135141500 | T | T | T |
| 0.3110725664420840 | 0.4315472748524480 | 0.8936888550398424 | T | T | T |
| 0.2031767348169360 | 0.4567902855746646 | 0.0035500472138833 | T | T | T |
| 0.0941491410245629 | 0.4293395752971864 | 0.8957788654521284 | T | T | T |
| 0.1023101254266464 | 0.4426687374896042 | 0.6977760256638968 | T | T | T |
| 0.2293962700634171 | 0.4635704789468817 | 0.7452253370113374 | T | T | T |
| 0.3564639253738658 | 0.6714530148738392 | 0.7402021553237870 | T | T | T |
| 0.3053143053374612 | 0.6536123581210539 | 0.9170851095460349 | T | T | T |
| 0.1912029553901026 | 0.6449255539596729 | 0.0153447248834951 | T | T | T |
| 0.0886020129413502 | 0.6697777473170337 | 0.8953383023802742 | T | T | T |
| 0.1032279981440525 | 0.6559921913940160 | 0.7001004087613021 | T | T | T |
| 0.2284670739531217 | 0.6385741573315350 | 0.7560158161445452 | T | T | T |
| 0.3237089448182444 | 0.5490264055188466 | 0.7982010493067608 | T | T | T |
| 0.0808806270469281 | 0.5487859810161672 | 0.8137747741458056 | T | T | T |
| 0.4321683417231185 | 0.3749624479081348 | 0.5724759754015054 | T | T | T |
| 0.4189400504356290 | 0.5069798598506448 | 0.5649850456114631 | T | T | T |
| 0.3965727002669826 | 0.6386795274458389 | 0.5580007038415991 | T | T | T |
| 0.1959741617277729 | 0.3677746617035987 | 0.6159576014734436 | T | T | T |
| 0.1821835385669471 | 0.4960535975121692 | 0.5636254889967763 | T | T | T |
| 0.1949910936886878 | 0.6300230652640245 | 0.5625692428036958 | T | T | T |
| 0.9861199373809989 | 0.4547389217625038 | 0.7838730120900543 | T | T | T |
| 0.9841267329927278 | 0.6367283094634261 | 0.7813753294272976 | T | T | T |
| 0.1446098583481511 | 0.5638599829362714 | 0.2145378604168120 | T | T | T |
| 0.1963355741350106 | 0.5621283727364839 | 0.3946838947798858 | T | T | T |
| 0.2987313707855070 | 0.5508810409779509 | 0.5220593316327256 | T | T | T |
| 0.3987000128916989 | 0.5696906030897334 | 0.3926215084535806 | T | T | T |
| 0.3999888334131725 | 0.5555962614048130 | 0.1966393630345152 | T | T | T |
| 0.2735296502916351 | 0.5331977845516397 | 0.2406664754509310 | T | T | T |
| 0.1407139026106579 | 0.3248273986334629 | 0.2460509576381904 | T | T | T |
| 0.1916560315414959 | 0.3470853020186227 | 0.4217034274055932 | T | T | T |
| 0.3087644331580503 | 0.3530139512340398 | 0.5124120289831570 | T | T | T |
| 0.4095739384241877 | 0.3260590217244848 | 0.3892786982563694 | T | T | T |
| 0.3926380027918311 | 0.3437748820139918 | 0.1935182605754586 | T | T | T |
| 0.2702834960836137 | 0.3517383548536164 | 0.2612329383699167 | T | T | T |
| 0.1791712667425434 | 0.4474450975436723 | 0.2937485810497794 | T | T | T |
| 0.4117872700655598 | 0.4483174459068447 | 0.3153378002859487 | T | T | T |
| 0.0683692335966599 | 0.6226037023317417 | 0.0791238280420399 | T | T | T |
| 0.0847131754810274 | 0.4909564139861506 | 0.0718690562408202 | T | T | T |
| 0.1178902407614325 | 0.3612650013255941 | 0.0580005192736549 | T | T | T |
| 0.3064709543093853 | 0.6291803610879868 | 0.1111200135375591 | T | T | T |
| 0.3214661280333144 | 0.4999053992560806 | 0.0614856842352374 | T | T | T |
| 0.2938208058388803 | 0.3679510276434955 | 0.0650769044046517 | T | T | T |

**Structure files (CONTCAR) involved in this work:**

|                    |                    |                    |   |   |   |
|--------------------|--------------------|--------------------|---|---|---|
| 0.5111713080080436 | 0.5351953434581797 | 0.2968229090572931 | T | T | T |
| 0.5108347508011473 | 0.3625407578321084 | 0.2717922126203827 | T | T | T |
| 0.4402042840698598 | 0.7497738990965572 | 0.6420051846203434 | T | T | T |
| 0.1951450273355227 | 0.7477256658950762 | 0.6500941629371113 | T | T | T |
| 0.2730203678144056 | 0.7485846587207303 | 0.0469923769270605 | T | T | T |
| 0.1086610013656003 | 0.7472872979914829 | 0.0520040365640895 | T | T | T |
| 0.0678237592178475 | 0.2478866006991239 | 0.1277027653442576 | T | T | T |
| 0.3049502228134144 | 0.2483370310438544 | 0.1452754368621232 | T | T | T |
| 0.2275123283892160 | 0.2494158019934535 | 0.5464781558423236 | T | T | T |
| 0.3913517067519540 | 0.2501110826153096 | 0.5477668440221842 | T | T | T |
| 0.5576170412208271 | 0.2496146410325824 | 0.3523532845305842 | T | T | T |
| 0.8097028458877961 | 0.2523940406580142 | 0.3487454766452586 | T | T | T |
| 0.7279850783511859 | 0.2488622070745667 | 0.9466268815297202 | T | T | T |
| 0.8917927295977330 | 0.2491826458379331 | 0.9405500221106107 | T | T | T |
| 0.9438123481596842 | 0.7519595360668140 | 0.8615594324716020 | T | T | T |
| 0.6839398323152942 | 0.7535673805100529 | 0.8547322619220161 | T | T | T |
| 0.7746522451172707 | 0.7472327470800482 | 0.4417871598158644 | T | T | T |
| 0.6082503131745761 | 0.7489633662317714 | 0.4510750946209631 | T | T | T |
| 0.9274185743775801 | 0.4912840356117481 | 0.5288186727658962 | T | T | T |
| 0.8236612979222773 | 0.3356626435681821 | 0.3255015621854469 | T | T | T |
| 0.7996698198559367 | 0.6389420674364380 | 0.6917410204894762 | T | T | T |
| 0.9285136748567311 | 0.5284179324526924 | 0.1909194559771956 | T | T | T |
| 0.8628251554445137 | 0.5570797468415296 | 0.5564607936557135 | T | T | T |
| 0.9305049016894985 | 0.4307759396341378 | 0.4043361877364742 | T | T | T |
| 0.9846428823520182 | 0.6096713329499817 | 0.3801305732041996 | T | T | T |
| 0.0296934516927258 | 0.5430449526460563 | 0.4529590159006679 | T | T | T |
| 0.0782995440143028 | 0.6034579828414121 | 0.3722475415276836 | T | T | T |
| 0.9561798146809107 | 0.4786826842702200 | 0.5847144854027158 | T | T | T |
| 0.0558477908173688 | 0.4299417750744549 | 0.4788777145218059 | T | T | T |
| 0.0546457170459717 | 0.4176845533379410 | 0.3442873073105170 | T | T | T |
| 0.0310710309203017 | 0.5855935311310786 | 0.4018949834247537 | T | T | T |
| 0.0242687744988224 | 0.4249006488882034 | 0.4117483672752535 | T | T | T |

**Figure S17 ZnFe-FS**

Si O Al Zn Fe H C

1.0000000000000000

20.0219999999999985 0.0000000000000000 0.0000000000000000

0.0000000000000000 19.8990000000000009 0.0000000000000000

0.0000000000000000 0.0000000000000000 13.3829999999999991

93 193 3 1 1 6 2

Selective dynamics

Direct

|                    |                    |                    |   |   |   |
|--------------------|--------------------|--------------------|---|---|---|
| 0.4234721263150058 | 0.0583922075822620 | 0.6476192062936607 | T | T | T |
| 0.3059479100656803 | 0.0279298934569006 | 0.7928097312165532 | T | T | T |
| 0.2826872102618561 | 0.0580327477540328 | 0.0148066294867135 | T | T | T |
| 0.1233776898361897 | 0.0611094209240880 | 0.0115112550457105 | T | T | T |
| 0.0689229355517202 | 0.0297460070799589 | 0.8002654645570964 | T | T | T |
| 0.1810868441083865 | 0.0578813521395004 | 0.6606954992863339 | T | T | T |
| 0.4203185982823366 | 0.8265404541976622 | 0.6687849184733815 | T | T | T |
| 0.3048684345846722 | 0.8691618867379111 | 0.8086986347546748 | T | T | T |
| 0.2675752199263718 | 0.8291526991182683 | 0.0271245377453639 | T | T | T |
| 0.1132131482819773 | 0.8253770288048538 | 0.0132172484556849 | T | T | T |
| 0.0660880878800441 | 0.8725244950819464 | 0.7997137570793584 | T | T | T |
| 0.1830313949644695 | 0.8274705959966997 | 0.6723915612351470 | T | T | T |

**Structure files (CONTCAR) involved in this work:**

|                    |                    |                    |   |   |   |
|--------------------|--------------------|--------------------|---|---|---|
| 0.0782012676844742 | 0.9402090102841550 | 0.1490322246039524 | T | T | T |
| 0.1964342952479052 | 0.9713382042866429 | 0.2934232959613284 | T | T | T |
| 0.2189935526970401 | 0.9385907581077935 | 0.5157415822770169 | T | T | T |
| 0.3790221773355311 | 0.9347591896983697 | 0.5133873422688778 | T | T | T |
| 0.4341752850722779 | 0.9681505646381841 | 0.3017090135680764 | T | T | T |
| 0.3216127450242879 | 0.9410144037742137 | 0.1614234612487342 | T | T | T |
| 0.0831350721399669 | 0.1719098159421012 | 0.1652962121158126 | T | T | T |
| 0.1963198491266491 | 0.1300980183241967 | 0.3092016979435959 | T | T | T |
| 0.2333216084342615 | 0.1709340715845832 | 0.5261070653995490 | T | T | T |
| 0.3880111958563845 | 0.1734933914329108 | 0.5097028607136331 | T | T | T |
| 0.4361492138208661 | 0.1265589234442823 | 0.2968991039442697 | T | T | T |
| 0.3169737808870133 | 0.1699478106568452 | 0.1716113059321641 | T | T | T |
| 0.5770724596607044 | 0.5556559749041203 | 0.3536004281552836 | T | T | T |
| 0.6906107207988526 | 0.5259294616419714 | 0.2007497567641076 | T | T | T |
| 0.7142488457866096 | 0.5665598851112684 | 0.9842094897998460 | T | T | T |
| 0.8717330965873493 | 0.5714295760738082 | 0.9867315410672650 | T | T | T |
| 0.8110721813943865 | 0.5483153741212979 | 0.3437502632981383 | T | T | T |
| 0.5734412539938103 | 0.3276062489275027 | 0.3301452699277995 | T | T | T |
| 0.6944619805325473 | 0.3718623929501443 | 0.1926449941275882 | T | T | T |
| 0.7301194755703215 | 0.3264213986731181 | 0.9797079196290445 | T | T | T |
| 0.8846252602358909 | 0.3252950861584399 | 0.9929991124214822 | T | T | T |
| 0.9411076496954109 | 0.3754969785166253 | 0.1857494135219263 | T | T | T |
| 0.9205202209412365 | 0.4451708372880964 | 0.8608641477147284 | T | T | T |
| 0.7990628623624739 | 0.4717741287698947 | 0.7207106079277117 | T | T | T |
| 0.7739238678359038 | 0.4352369969077984 | 0.4957301301672772 | T | T | T |
| 0.6167964343701380 | 0.4284822058374819 | 0.4885789363522293 | T | T | T |
| 0.5676704429692164 | 0.4683257589756172 | 0.7019686459794773 | T | T | T |
| 0.6739995140518436 | 0.4460987343380780 | 0.8568361075418819 | T | T | T |
| 0.9202075121816983 | 0.6771248133267908 | 0.8299842764642118 | T | T | T |
| 0.7694050175792584 | 0.6685381428766796 | 0.4614035215397761 | T | T | T |
| 0.6141902437302922 | 0.6722345215125449 | 0.4857689485506246 | T | T | T |
| 0.5615050547440459 | 0.6266769854465738 | 0.6980408635270844 | T | T | T |
| 0.6729573161462645 | 0.6740465033563722 | 0.8266432707746575 | T | T | T |
| 0.5793200530247198 | 0.9441087140214951 | 0.3578064075901316 | T | T | T |
| 0.6992580478542674 | 0.9728435178381222 | 0.2136725483571008 | T | T | T |
| 0.7217859389895064 | 0.9376458319623089 | 0.9917324934405872 | T | T | T |
| 0.8821169335670455 | 0.9340632874121374 | 0.9950734433084848 | T | T | T |
| 0.9341629409956235 | 0.9693109186049974 | 0.2052782560266993 | T | T | T |
| 0.8234532680226072 | 0.9457784291292433 | 0.3527892183416527 | T | T | T |
| 0.5789280768332181 | 0.1728168140034772 | 0.3284841127402985 | T | T | T |
| 0.6987601817466111 | 0.1315551463765398 | 0.1926539881107748 | T | T | T |
| 0.7329690932869042 | 0.1702862321915015 | 0.9715935761694845 | T | T | T |
| 0.8876606171453968 | 0.1728713537257862 | 0.9831605913632517 | T | T | T |
| 0.9375666352299984 | 0.1275005761775664 | 0.1967952165845848 | T | T | T |
| 0.8217493351424511 | 0.1737661477922686 | 0.3287900549391633 | T | T | T |
| 0.9241510878062701 | 0.0540487255462406 | 0.8553502852528976 | T | T | T |
| 0.8035989255567755 | 0.0255042393380473 | 0.7069437018591502 | T | T | T |
| 0.7825620538233045 | 0.0663697782439076 | 0.4902067737671232 | T | T | T |
| 0.6219546680407002 | 0.0691103431875418 | 0.4899005366810422 | T | T | T |
| 0.5683734670248546 | 0.0317986923384361 | 0.6987553130854355 | T | T | T |
| 0.6803765462240481 | 0.0533951620414145 | 0.8461788081968002 | T | T | T |
| 0.9238225907196932 | 0.8295713347597742 | 0.8361604857020732 | T | T | T |
| 0.8033271358520718 | 0.8679601393109474 | 0.6939771095794276 | T | T | T |

**Structure files (CONTCAR) involved in this work:**

|                    |                    |                    |   |   |   |
|--------------------|--------------------|--------------------|---|---|---|
| 0.7707234498921963 | 0.8257876529184696 | 0.4774756002664705 | T | T | T |
| 0.6155154973181980 | 0.8261334098145865 | 0.4911596296710046 | T | T | T |
| 0.5643244317051193 | 0.8747369664431099 | 0.6987856588558481 | T | T | T |
| 0.6797357119272515 | 0.8326667331744310 | 0.8319731424559834 | T | T | T |
| 0.4234499309000626 | 0.4438676044912224 | 0.6391021164015603 | T | T | T |
| 0.3043388247428625 | 0.4709758850106597 | 0.7857224899075362 | T | T | T |
| 0.2816137272113886 | 0.4377868835368222 | 0.0049008398177561 | T | T | T |
| 0.1237342697659212 | 0.4360743213969272 | 0.0096624541817759 | T | T | T |
| 0.0654965126297564 | 0.4700210171613588 | 0.8001239985438759 | T | T | T |
| 0.1776098530402334 | 0.4446060680827025 | 0.6537742710724983 | T | T | T |
| 0.4185921879446357 | 0.6728243837532661 | 0.6586947001343032 | T | T | T |
| 0.3026317048698668 | 0.6287060027527591 | 0.8008336827995868 | T | T | T |
| 0.2693040178642297 | 0.6709326045211719 | 0.0189179933520979 | T | T | T |
| 0.1151386464330044 | 0.6716191831777197 | 0.0059777637853131 | T | T | T |
| 0.0638008236298740 | 0.6286101155066308 | 0.7956603500129146 | T | T | T |
| 0.1808273746233803 | 0.6686849301723461 | 0.6658243202776339 | T | T | T |
| 0.0746650503809471 | 0.5573905204076129 | 0.1464310958334970 | T | T | T |
| 0.1978449079348842 | 0.5279068842037674 | 0.2827154359466887 | T | T | T |
| 0.2197297899878561 | 0.5611620281387598 | 0.5096779022741188 | T | T | T |
| 0.3780282088987910 | 0.5663215857928594 | 0.5073724664807596 | T | T | T |
| 0.4294809036682286 | 0.5275014675585307 | 0.2974698712445634 | T | T | T |
| 0.3239130874331982 | 0.5543475802038418 | 0.1458641464824109 | T | T | T |
| 0.0861172627061088 | 0.3247147090779799 | 0.1571606460211984 | T | T | T |
| 0.1965774677016715 | 0.3694171226696078 | 0.3043708619277157 | T | T | T |
| 0.2319192808617664 | 0.3298868703145568 | 0.5232912097664072 | T | T | T |
| 0.3863511082655891 | 0.3269976106867821 | 0.5045917533493497 | T | T | T |
| 0.4321792727856150 | 0.3702546110405882 | 0.2909673401885141 | T | T | T |
| 0.3150887019249898 | 0.3281350391964175 | 0.1650001310740320 | T | T | T |
| 0.3580885050347559 | 0.0651284808516814 | 0.7184608945399498 | T | T | T |
| 0.3124834614392866 | 0.0621840802708231 | 0.9022937300762464 | T | T | T |
| 0.2027237742254298 | 0.0447705372660011 | 0.0120088637548756 | T | T | T |
| 0.0955595131147647 | 0.0691956762271468 | 0.8987060239697127 | T | T | T |
| 0.1048349023147038 | 0.0604016363265467 | 0.7015133440598007 | T | T | T |
| 0.2299298840853537 | 0.0372846522816469 | 0.7529155288077015 | T | T | T |
| 0.3607508048142994 | 0.8251671559697952 | 0.7507368771765308 | T | T | T |
| 0.3071923734280836 | 0.8488966612533567 | 0.9255834894701558 | T | T | T |
| 0.1900371521484828 | 0.8524870555730619 | 0.0161610571820868 | T | T | T |
| 0.0852126765385169 | 0.8314399604822795 | 0.9002255655780266 | T | T | T |
| 0.1056233931962843 | 0.8399291402069864 | 0.7049592522771124 | T | T | T |
| 0.2310583200478878 | 0.8531358589578585 | 0.7632715528009181 | T | T | T |
| 0.3232657785470300 | 0.9481769089957582 | 0.7957769164566626 | T | T | T |
| 0.0876897482360417 | 0.9506634205719946 | 0.8123733729345023 | T | T | T |
| 0.4324318767049068 | 0.1274840029627484 | 0.5842978324126014 | T | T | T |
| 0.4168607902040449 | 0.9957355200108041 | 0.5704550090794754 | T | T | T |
| 0.3954505474759445 | 0.8638922824396029 | 0.5676634088629164 | T | T | T |
| 0.2005780396040497 | 0.1320577501432618 | 0.6202046813568806 | T | T | T |
| 0.1857567776077278 | 0.0027173878498911 | 0.5716668927497655 | T | T | T |
| 0.1994922991141599 | 0.8684694230633221 | 0.5703913221206930 | T | T | T |
| 0.9891346004957139 | 0.0401008683685861 | 0.7860142340384435 | T | T | T |
| 0.9860062433942166 | 0.8675134857815879 | 0.7807388091945926 | T | T | T |
| 0.1444043472626422 | 0.9347107006265601 | 0.2185033755628115 | T | T | T |
| 0.1905024267067127 | 0.9360777382044810 | 0.4023248429359014 | T | T | T |
| 0.2993663790225184 | 0.9488696397975024 | 0.5155399119689338 | T | T | T |

**Structure files (CONTCAR) involved in this work:**

|                    |                    |                    |   |   |   |
|--------------------|--------------------|--------------------|---|---|---|
| 0.4060590789313693 | 0.9294910161515597 | 0.3998900674631002 | T | T | T |
| 0.3976537466292244 | 0.9381582121390603 | 0.2030779484535235 | T | T | T |
| 0.2723767212368194 | 0.9631328756712135 | 0.2525274806805508 | T | T | T |
| 0.1413300144122247 | 0.1738050812310823 | 0.2493612615488754 | T | T | T |
| 0.1925446614652679 | 0.1520435822398444 | 0.4253932818243729 | T | T | T |
| 0.3107452206952667 | 0.1479093577203963 | 0.5124675909497737 | T | T | T |
| 0.4162160433668321 | 0.1682671089642354 | 0.3967191367537924 | T | T | T |
| 0.3947771358299570 | 0.1573544829226404 | 0.2023860316629975 | T | T | T |
| 0.2706542042318691 | 0.1457019902743939 | 0.2653354149394961 | T | T | T |
| 0.1783494200066642 | 0.0508862617687946 | 0.2985378085059482 | T | T | T |
| 0.4176076600112693 | 0.0478653656748913 | 0.3125470311702651 | T | T | T |
| 0.0681826187963406 | 0.8697799470591928 | 0.0894471661716181 | T | T | T |
| 0.0843873342057307 | 0.0004344510695594 | 0.0674647383126461 | T | T | T |
| 0.1091736645157231 | 0.1315186942173084 | 0.0678401314302381 | T | T | T |
| 0.3015466556373725 | 0.8669791891678912 | 0.1213325540391590 | T | T | T |
| 0.3181174376780593 | 0.9953497394629608 | 0.0711654167412055 | T | T | T |
| 0.2986015500152129 | 0.1282873111109617 | 0.0712077532942285 | T | T | T |
| 0.5137096282970874 | 0.9551445074772077 | 0.2885696447317559 | T | T | T |
| 0.5159534371096268 | 0.1340513277871629 | 0.2766322018916212 | T | T | T |
| 0.6373917265361523 | 0.5622499004131890 | 0.2739497476418916 | T | T | T |
| 0.6999158925545923 | 0.5730456401176880 | 0.1033629119898262 | T | T | T |
| 0.7930598426537612 | 0.5564301157293449 | 0.9594418588673306 | T | T | T |
| 0.8830540424625309 | 0.5775148005819832 | 0.1049330114946102 | T | T | T |
| 0.8872960383673837 | 0.5260140645131850 | 0.3174598568814357 | T | T | T |
| 0.7617823930961327 | 0.5214956966225974 | 0.2592843587263936 | T | T | T |
| 0.6411768881471294 | 0.3350295366841610 | 0.2662777427926242 | T | T | T |
| 0.6910887896845909 | 0.3335578838190359 | 0.0851412420730113 | T | T | T |
| 0.8074581068165578 | 0.3511100952297799 | 0.9908055587924984 | T | T | T |
| 0.9102453494415379 | 0.3200289450197201 | 0.1087432556601020 | T | T | T |
| 0.9084762989617483 | 0.3636489900965021 | 0.2994596451422421 | T | T | T |
| 0.7681448454227803 | 0.3690670273041244 | 0.2394081901774947 | T | T | T |
| 0.6689374224776813 | 0.4494751028459673 | 0.1749910278829193 | T | T | T |
| 0.9238891416558501 | 0.4488143960556097 | 0.1478353522755206 | T | T | T |
| 0.5685773099662697 | 0.6267882579481300 | 0.4116639829387621 | T | T | T |
| 0.5927132938647360 | 0.4979033328115411 | 0.4364984697970261 | T | T | T |
| 0.5801899658094075 | 0.3644182323426775 | 0.4386802233989806 | T | T | T |
| 0.8024237239565215 | 0.6284034325154717 | 0.3664767376631001 | T | T | T |
| 0.7919373534215135 | 0.5135639128989705 | 0.4556497073092700 | T | T | T |
| 0.8249891980351071 | 0.3866835088242526 | 0.4360120585751742 | T | T | T |
| 0.0087280146832972 | 0.5531853806186059 | 0.2135506867063455 | T | T | T |
| 0.0208685866020882 | 0.3631213142841915 | 0.2002523363182036 | T | T | T |
| 0.8562350693419601 | 0.4349912595164236 | 0.7863260075905696 | T | T | T |
| 0.7902083663537655 | 0.4326293868861630 | 0.6139647026621001 | T | T | T |
| 0.6971889679389606 | 0.4194900372735991 | 0.4705867082055100 | T | T | T |
| 0.6011075010361929 | 0.4295843686440907 | 0.6069480549224419 | T | T | T |
| 0.6011886782645416 | 0.4409406413183763 | 0.8044637963079170 | T | T | T |
| 0.7273784211386131 | 0.4733514438476471 | 0.7741046476546700 | T | T | T |
| 0.8616195267201633 | 0.6806553897146406 | 0.7489495120084629 | T | T | T |
| 0.8130821219558956 | 0.6441965401044881 | 0.5604417636768464 | T | T | T |
| 0.6920298989312428 | 0.6465616831621248 | 0.4790491260481067 | T | T | T |
| 0.5871061040215054 | 0.6661121879691798 | 0.5988994832877881 | T | T | T |
| 0.5947130367470893 | 0.6610261206594720 | 0.7962535344149456 | T | T | T |
| 0.7191445362763649 | 0.6492470888206469 | 0.7349432832300861 | T | T | T |



**Structure files (CONTCAR) involved in this work:**

|                    |                    |                    |   |   |   |
|--------------------|--------------------|--------------------|---|---|---|
| 0.8230044223004229 | 0.5487566350939589 | 0.6939812495241513 | T | T | T |
| 0.5821936899130880 | 0.5480211551213883 | 0.6885911304378677 | T | T | T |
| 0.9297386295680548 | 0.3769358070478707 | 0.9267372719438092 | T | T | T |
| 0.9134708557616843 | 0.5099447507169013 | 0.9327176909960649 | T | T | T |
| 0.8959913492850528 | 0.6404116395414642 | 0.9321767005248306 | T | T | T |
| 0.6943042638972881 | 0.3718393900728013 | 0.8946447320052423 | T | T | T |
| 0.6727103285967390 | 0.5004218050667419 | 0.9469899599973467 | T | T | T |
| 0.6878257097758219 | 0.6342155960360193 | 0.9304251394276158 | T | T | T |
| 0.4883924840628511 | 0.4524175923428499 | 0.7102985884958503 | T | T | T |
| 0.4807602725963502 | 0.6320361965457076 | 0.7078509327436674 | T | T | T |
| 0.6446089945134694 | 0.9383491247123760 | 0.2868216844877159 | T | T | T |
| 0.6984642553066037 | 0.9335897326864855 | 0.1075267660899344 | T | T | T |
| 0.8022955579623174 | 0.9453901490162819 | 0.9826955167148392 | T | T | T |
| 0.9026261737988707 | 0.9277730792373649 | 0.1118467492850734 | T | T | T |
| 0.8990205383294839 | 0.9464177436876180 | 0.3090777114476596 | T | T | T |
| 0.7730528900619160 | 0.9655269305252059 | 0.2623653063620101 | T | T | T |
| 0.6414550726474829 | 0.1729357891869790 | 0.2519518665214813 | T | T | T |
| 0.6961066561703477 | 0.1554604903906724 | 0.0770834450201559 | T | T | T |
| 0.8106252245191321 | 0.1466331843633456 | 0.9802251214152802 | T | T | T |
| 0.9157193792747934 | 0.1673428579826205 | 0.0962088321027708 | T | T | T |
| 0.8981109180020099 | 0.1565892410382830 | 0.2932963274219537 | T | T | T |
| 0.7717521996675607 | 0.1465900293187790 | 0.2403558338939724 | T | T | T |
| 0.6815865581634761 | 0.0518024341896652 | 0.1992687023623404 | T | T | T |
| 0.9210598390245677 | 0.0483369607195697 | 0.1830953164894875 | T | T | T |
| 0.5708708973526785 | 0.8745132802530603 | 0.4203008368728441 | T | T | T |
| 0.5850460281921971 | 0.0057444869960245 | 0.4369374745633032 | T | T | T |
| 0.5999782537294517 | 0.1379036176173095 | 0.4337178274352636 | T | T | T |
| 0.8083533453142322 | 0.8706599559300341 | 0.3942594425226975 | T | T | T |
| 0.8171418514169021 | 0.9995122399787360 | 0.4432878057134819 | T | T | T |
| 0.8062376443348594 | 0.1336151575416422 | 0.4325509000762995 | T | T | T |
| 0.0133505892195951 | 0.9537777746861654 | 0.2186405454167089 | T | T | T |
| 0.0173461332931281 | 0.1374511067238698 | 0.2143667041124272 | T | T | T |
| 0.8583170456274537 | 0.0536359752976113 | 0.7852716684752454 | T | T | T |
| 0.8054047688696478 | 0.0715225674194279 | 0.6066652154188027 | T | T | T |
| 0.7019372056333391 | 0.0580393017189021 | 0.4819245037151553 | T | T | T |
| 0.5986830980382317 | 0.0750533793666556 | 0.6058256325020794 | T | T | T |
| 0.6047209346106538 | 0.0518524897987898 | 0.8028864179040801 | T | T | T |
| 0.7297854286928572 | 0.0296386006703357 | 0.7566274759393034 | T | T | T |
| 0.8593465906273370 | 0.8338050875078495 | 0.7637599817915597 | T | T | T |
| 0.8066322365957164 | 0.8311084234589189 | 0.5857475961192053 | T | T | T |
| 0.6933665326645018 | 0.8500891893483987 | 0.4869904769535815 | T | T | T |
| 0.5888888637553591 | 0.8284484945132642 | 0.6055198220775500 | T | T | T |
| 0.6037732480635857 | 0.8526013146146374 | 0.7996183000187975 | T | T | T |
| 0.7296908820027573 | 0.8572384825150507 | 0.7427138635939901 | T | T | T |
| 0.8187826498108027 | 0.9474870989754227 | 0.6791695349521704 | T | T | T |
| 0.5797728279507330 | 0.9527989725927400 | 0.6724997164016326 | T | T | T |
| 0.9321842159158422 | 0.1274445339011244 | 0.9075162580058626 | T | T | T |
| 0.9199734102893591 | 0.9974847166569776 | 0.9430889000218615 | T | T | T |
| 0.9057024518720459 | 0.8648802307224118 | 0.9421088621985032 | T | T | T |
| 0.6971032710134291 | 0.1293296911363306 | 0.8817979735826952 | T | T | T |
| 0.6867086945533879 | 0.0029676251307433 | 0.9410854052602609 | T | T | T |
| 0.6984668722596271 | 0.8691281134295917 | 0.9365930110987013 | T | T | T |
| 0.4895557600305895 | 0.0476038247809606 | 0.7156501336521861 | T | T | T |

**Structure files (CONTCAR) involved in this work:**

|                    |                    |                    |   |   |   |
|--------------------|--------------------|--------------------|---|---|---|
| 0.4847635539153840 | 0.8642406393129571 | 0.7170166827092876 | T | T | T |
| 0.3567687017623135 | 0.4377551359086352 | 0.7075585910836267 | T | T | T |
| 0.3078539174460063 | 0.4298301114482423 | 0.8904908845697374 | T | T | T |
| 0.2024892140910349 | 0.4563015506768190 | 0.0072424604776827 | T | T | T |
| 0.0948946093464361 | 0.4307782869851597 | 0.8965076810487036 | T | T | T |
| 0.1014795149435638 | 0.4436587137531062 | 0.6976940777793719 | T | T | T |
| 0.2285841284110759 | 0.4661889758354059 | 0.7424301223966711 | T | T | T |
| 0.3555161952247374 | 0.6702312599857773 | 0.7339576562775247 | T | T | T |
| 0.3063589915325591 | 0.6587990383536534 | 0.9127717850244074 | T | T | T |
| 0.1923419885801919 | 0.6456035093169455 | 0.0103131184814887 | T | T | T |
| 0.0898888702416415 | 0.6717038251670759 | 0.8907154108649633 | T | T | T |
| 0.1030760670939682 | 0.6547018056832342 | 0.6958392220202076 | T | T | T |
| 0.2278941269497366 | 0.6380532285056988 | 0.7545392676640796 | T | T | T |
| 0.3228799761673290 | 0.5496237453854332 | 0.8024859381824513 | T | T | T |
| 0.0802255240753152 | 0.5495408226270244 | 0.8137335832369647 | T | T | T |
| 0.4323350578239313 | 0.3759886027895591 | 0.5728494691110989 | T | T | T |
| 0.4206368937804714 | 0.5079717670205803 | 0.5635473090988716 | T | T | T |
| 0.3974237819012064 | 0.6394149363275569 | 0.5523388795910208 | T | T | T |
| 0.1957255967468109 | 0.3698205291099275 | 0.6140116937734436 | T | T | T |
| 0.1811165043364249 | 0.4981347498712153 | 0.5618542255826167 | T | T | T |
| 0.1968034459227443 | 0.6317099429625608 | 0.5599759580480769 | T | T | T |
| 0.9856295890590121 | 0.4547334689637949 | 0.7875063152053098 | T | T | T |
| 0.9840338511983108 | 0.6374286187809755 | 0.7797752332611154 | T | T | T |
| 0.1417455895504048 | 0.5652459139525409 | 0.2160091566130543 | T | T | T |
| 0.2004852754805271 | 0.5635422946640434 | 0.3921410147349915 | T | T | T |
| 0.2994124977390574 | 0.5499721781609777 | 0.5249347374094760 | T | T | T |
| 0.3959148161796918 | 0.5683360976547036 | 0.3896580872480456 | T | T | T |
| 0.3985371014584357 | 0.5551138349807664 | 0.1933166214181677 | T | T | T |
| 0.2712592310490509 | 0.5328631567706503 | 0.2326316375406069 | T | T | T |
| 0.1417146754744760 | 0.3252063368187989 | 0.2452298666342307 | T | T | T |
| 0.1925198809056899 | 0.3473482781872799 | 0.4205572390846283 | T | T | T |
| 0.3093482101255398 | 0.3535043837456100 | 0.5116501112672626 | T | T | T |
| 0.4108202316553801 | 0.3270729349089455 | 0.3890492517738980 | T | T | T |
| 0.3928461425719265 | 0.3427606743876448 | 0.1927962283793351 | T | T | T |
| 0.2705077809184927 | 0.3543532646601993 | 0.2595124779725532 | T | T | T |
| 0.1782397883932583 | 0.4487004207072022 | 0.2941845363407309 | T | T | T |
| 0.4130423406106080 | 0.4482130383660465 | 0.3121605245467193 | T | T | T |
| 0.0693519871191264 | 0.6228314040275346 | 0.0733891270810484 | T | T | T |
| 0.0831518587024856 | 0.4910823464862633 | 0.0746233014305869 | T | T | T |
| 0.1151146352937612 | 0.3616671712104549 | 0.0582160347673330 | T | T | T |
| 0.3073800387238378 | 0.6290919239343853 | 0.1055715656330274 | T | T | T |
| 0.3222937530907599 | 0.4996147313476750 | 0.0558354454932694 | T | T | T |
| 0.2947388665632102 | 0.3674540722381072 | 0.0632506872084306 | T | T | T |
| 0.5094345827110900 | 0.5388050512694812 | 0.2931025785362200 | T | T | T |
| 0.5115998747148619 | 0.3618054303622449 | 0.2692780514858051 | T | T | T |
| 0.4397392705307478 | 0.7501082135038241 | 0.6386864914580255 | T | T | T |
| 0.1950463001768166 | 0.7481931096296162 | 0.6508727870714802 | T | T | T |
| 0.2729255290522851 | 0.7494593874306116 | 0.0486672262556447 | T | T | T |
| 0.1099677996554743 | 0.7476870929589693 | 0.0489007778621915 | T | T | T |
| 0.0670431207130076 | 0.2480267026608516 | 0.1291440735758323 | T | T | T |
| 0.3035868280296842 | 0.2485697723715016 | 0.1468268660715679 | T | T | T |
| 0.2277483975494760 | 0.2506439194679046 | 0.5483752797884116 | T | T | T |
| 0.3923966864289628 | 0.2509493450663375 | 0.5471414064974709 | T | T | T |

**Structure files (CONTCAR) involved in this work:**

|                    |                    |                    |   |   |   |
|--------------------|--------------------|--------------------|---|---|---|
| 0.5573017680779391 | 0.2494777833696007 | 0.3526349908519494 | T | T | T |
| 0.8140866314875549 | 0.2525732978540032 | 0.3479985924176808 | T | T | T |
| 0.7275262639513355 | 0.2490946600388267 | 0.9425148391687587 | T | T | T |
| 0.8914915601621675 | 0.2504707629736699 | 0.9454326103053060 | T | T | T |
| 0.9445884243402846 | 0.7526579792879917 | 0.8593887968907640 | T | T | T |
| 0.6852858071241308 | 0.7529168496935368 | 0.8503253614381965 | T | T | T |
| 0.7757265325286570 | 0.7478914998838593 | 0.4409396649334828 | T | T | T |
| 0.6094484192034652 | 0.7497383844777596 | 0.4496661076041356 | T | T | T |
| 0.9212312320194948 | 0.4844805136416280 | 0.5295503522997597 | T | T | T |
| 0.8232310508992474 | 0.3361751748998335 | 0.3247849228741800 | T | T | T |
| 0.7987585906423432 | 0.6364043946714831 | 0.6949257699195703 | T | T | T |
| 0.9261662037729069 | 0.5302801736021895 | 0.1927334303707080 | T | T | T |
| 0.8623029708415693 | 0.5573044340292700 | 0.5558817961720296 | T | T | T |
| 0.9221895392207865 | 0.4319638149849437 | 0.4076414565517709 | T | T | T |
| 1.0175118719938414 | 0.5419766943956088 | 0.3839938368440824 | T | T | T |
| 0.0412826857431137 | 0.5246560743664215 | 0.5108111404110464 | T | T | T |
| 0.0965140809044205 | 0.5094080200280506 | 0.4103257527708794 | T | T | T |
| 0.9484799546513631 | 0.4693775069665976 | 0.5857722586785882 | T | T | T |
| 0.0306010463074522 | 0.4017133755219804 | 0.4836647936430596 | T | T | T |
| 0.0337900593289895 | 0.4124599070242646 | 0.3488106488220544 | T | T | T |
| 0.0439673193243445 | 0.5068515088285031 | 0.4334809523678669 | T | T | T |
| 0.0202888411591458 | 0.4359310210732348 | 0.4205642247576180 | T | T | T |

**Figure S17 ZnCo-IS**

Si O Al Co Zn H C

1.0000000000000000

20.0219999999999985 0.0000000000000000 0.0000000000000000

0.0000000000000000 19.8990000000000009 0.0000000000000000

0.0000000000000000 0.0000000000000000 13.3829999999999991

93 193 3 1 1 6 2

Selective dynamics

Direct

|                    |                    |                    |   |   |   |
|--------------------|--------------------|--------------------|---|---|---|
| 0.4239975813757759 | 0.0570718644036710 | 0.6474677250265244 | T | T | T |
| 0.3047509019273306 | 0.0263985321565240 | 0.7921842008048373 | T | T | T |
| 0.2827171330917331 | 0.0593433206293836 | 0.0135679210525702 | T | T | T |
| 0.1234525123888992 | 0.0608422579234144 | 0.0112384918600878 | T | T | T |
| 0.0705239747846424 | 0.0290970359710286 | 0.7999825132207791 | T | T | T |
| 0.1804696942471035 | 0.0549977713480665 | 0.6556057650974015 | T | T | T |
| 0.4206877184667970 | 0.8262110525134596 | 0.6679963987009752 | T | T | T |
| 0.3043247343215387 | 0.8681228079766424 | 0.8095308906501998 | T | T | T |
| 0.2664117158088847 | 0.8270303565428362 | 0.0277586888062853 | T | T | T |
| 0.1117108000542677 | 0.8252175021852683 | 0.0141004162766784 | T | T | T |
| 0.0661373220548484 | 0.8721401906646329 | 0.7998483585835919 | T | T | T |
| 0.1829555251438545 | 0.8278314443275845 | 0.6714758977435245 | T | T | T |
| 0.0769740999296629 | 0.9411066048558734 | 0.1481118800709227 | T | T | T |
| 0.1972693796343928 | 0.9716562246399241 | 0.2912794750670181 | T | T | T |
| 0.2194879640663992 | 0.9370345954310305 | 0.5131028400894528 | T | T | T |
| 0.3793471566038723 | 0.9342617257479072 | 0.5129910052702440 | T | T | T |
| 0.4329240236124534 | 0.9682089388211641 | 0.3006953539438193 | T | T | T |
| 0.3223397293580046 | 0.9423041670603621 | 0.1557812560808673 | T | T | T |
| 0.0818655877841961 | 0.1708059858421653 | 0.1653411186648518 | T | T | T |
| 0.1966903424064029 | 0.1300689095817115 | 0.3094785801950646 | T | T | T |
| 0.2338855841320210 | 0.1707420639830700 | 0.5264321607727294 | T | T | T |
| 0.3882944982518608 | 0.1729770422134174 | 0.5105950837198573 | T | T | T |

**Structure files (CONTCAR) involved in this work:**

|                    |                    |                    |   |   |   |
|--------------------|--------------------|--------------------|---|---|---|
| 0.4367363209487250 | 0.1265461775503786 | 0.2977036748228868 | T | T | T |
| 0.3178422377328763 | 0.1698663626880061 | 0.1718511401799536 | T | T | T |
| 0.5768382435442717 | 0.5560514380367613 | 0.3564573883475124 | T | T | T |
| 0.6897189397104532 | 0.5254560352414610 | 0.2016748261869986 | T | T | T |
| 0.7159274843690282 | 0.5669247452794359 | 0.9868276587790910 | T | T | T |
| 0.8754661297459604 | 0.5718861274060894 | 0.9851347932871365 | T | T | T |
| 0.8090919148194353 | 0.5534934316981299 | 0.3409557247207967 | T | T | T |
| 0.5749961695218246 | 0.3274871313583160 | 0.3304691702961042 | T | T | T |
| 0.6953666654888747 | 0.3714414168345294 | 0.1919105428289008 | T | T | T |
| 0.7318925436475950 | 0.3271273190458492 | 0.9791446574886559 | T | T | T |
| 0.8865591268735151 | 0.3258801315997881 | 0.9949759574098985 | T | T | T |
| 0.9438373820660251 | 0.3738013850470390 | 0.1931963052084776 | T | T | T |
| 0.9207164717507765 | 0.4442884708936913 | 0.8586759606586977 | T | T | T |
| 0.8010564913017471 | 0.4725156928279969 | 0.7176439895242114 | T | T | T |
| 0.7760183951054069 | 0.4379044304480888 | 0.4918318237272765 | T | T | T |
| 0.6182509306749109 | 0.4290686195551728 | 0.4889786456410386 | T | T | T |
| 0.5693015060522737 | 0.4683524716285392 | 0.7017238092045085 | T | T | T |
| 0.6770385003752608 | 0.4470443175756953 | 0.8551745291102241 | T | T | T |
| 0.9194359784918748 | 0.6783374799785632 | 0.8262490843613556 | T | T | T |
| 0.7671823511033775 | 0.6692905759417240 | 0.4643311049560528 | T | T | T |
| 0.6129762218454278 | 0.6734468415718389 | 0.4896096611050255 | T | T | T |
| 0.5610072176883162 | 0.6265289774921708 | 0.6999688376282576 | T | T | T |
| 0.6752370266350215 | 0.6730610951992436 | 0.8254662064133266 | T | T | T |
| 0.5784681506255206 | 0.9445574667963152 | 0.3582383675847000 | T | T | T |
| 0.6991128695644838 | 0.9731029405761231 | 0.2145015925588643 | T | T | T |
| 0.7216124948035215 | 0.9366625484407307 | 0.9926931909841974 | T | T | T |
| 0.8819548716777554 | 0.9341929246611057 | 0.9952277558761160 | T | T | T |
| 0.9328087683018934 | 0.9704982514224156 | 0.2061704416479702 | T | T | T |
| 0.8232847174973479 | 0.9459728496738254 | 0.3549951488558913 | T | T | T |
| 0.5795698364288169 | 0.1727517340208565 | 0.3296910246689441 | T | T | T |
| 0.6991655042708799 | 0.1314243701906141 | 0.1929613168991838 | T | T | T |
| 0.7335271252645038 | 0.1710793432692526 | 0.9720644568335927 | T | T | T |
| 0.8880645731748170 | 0.1734058696745537 | 0.9843687610750392 | T | T | T |
| 0.9361999766395903 | 0.1287301692652155 | 0.1993384626977962 | T | T | T |
| 0.8203098097707258 | 0.1742816625650303 | 0.3307608149517284 | T | T | T |
| 0.9250735807771632 | 0.0548797291098368 | 0.8566517547663115 | T | T | T |
| 0.8041887107768821 | 0.0267535465549211 | 0.7089337810218564 | T | T | T |
| 0.7824088040074650 | 0.0661183262249416 | 0.4916194953163903 | T | T | T |
| 0.6220858344655334 | 0.0689195448190219 | 0.4905064849625763 | T | T | T |
| 0.5690030923729478 | 0.0313062659598327 | 0.6996371010903606 | T | T | T |
| 0.6804108004956453 | 0.0532674655807285 | 0.8485874750378674 | T | T | T |
| 0.9240677753170601 | 0.8302726425183861 | 0.8369042122183072 | T | T | T |
| 0.8031528635375105 | 0.8696058161508176 | 0.6963747994637906 | T | T | T |
| 0.7700799209203253 | 0.8269665335778363 | 0.4800309494646398 | T | T | T |
| 0.6153404163225200 | 0.8269038780083622 | 0.4918728972982319 | T | T | T |
| 0.5643854013296266 | 0.8743134591567855 | 0.6998450498801102 | T | T | T |
| 0.6796027755228655 | 0.8323995687970720 | 0.8329045318053347 | T | T | T |
| 0.4236356472375915 | 0.4429898514202941 | 0.6428537831737634 | T | T | T |
| 0.3036497382255195 | 0.4711893101781089 | 0.7881586182995217 | T | T | T |
| 0.2791874993044510 | 0.4379775409417750 | 0.0089903833198930 | T | T | T |
| 0.1219220345404034 | 0.4355142522500163 | 0.0120835135160616 | T | T | T |
| 0.0653394472183693 | 0.4697758969410825 | 0.7994515982145635 | T | T | T |
| 0.1773990998925553 | 0.4440721127527176 | 0.6532492014591991 | T | T | T |

**Structure files (CONTCAR) involved in this work:**

|                    |                    |                     |   |   |   |
|--------------------|--------------------|---------------------|---|---|---|
| 0.4179963502086112 | 0.6720624667942321 | 0.6631710629385507  | T | T | T |
| 0.3020742651242887 | 0.6287287621044766 | 0.8049569523004033  | T | T | T |
| 0.2664657373554711 | 0.6697369685253804 | 0.0236543618201502  | T | T | T |
| 0.1123905809873874 | 0.6715897788034704 | 0.0083308656425983  | T | T | T |
| 0.0622014219121122 | 0.6286360605227218 | 0.7952020070714053  | T | T | T |
| 0.1811062084453957 | 0.6694163383682022 | 0.6679318533456517  | T | T | T |
| 0.0795473873078805 | 0.5561241935189577 | 0.1467986385740078  | T | T | T |
| 0.1993276395620713 | 0.5239985111810748 | 0.2877534569611074  | T | T | T |
| 0.2172093239121256 | 0.5607788302999726 | 0.5112649438708959  | T | T | T |
| 0.3761378115983133 | 0.5653456107929125 | 0.5105601118945734  | T | T | T |
| 0.4294702615323713 | 0.5281799895964412 | 0.3002432515037545  | T | T | T |
| 0.3232100611299711 | 0.5528992123089608 | 0.1501779248606717  | T | T | T |
| 0.0868659986474744 | 0.3231852244376103 | 0.1580523284836659  | T | T | T |
| 0.1974195579124319 | 0.3665264930552081 | 0.3063279600967219  | T | T | T |
| 0.2324896290233481 | 0.3281249565242901 | 0.5245897098769873  | T | T | T |
| 0.3866170805043852 | 0.3266965967821370 | 0.5056824604167860  | T | T | T |
| 0.4332623863616756 | 0.3706291344661301 | 0.2922333219399718  | T | T | T |
| 0.3156911790033277 | 0.3283280990032182 | 0.1675449569617671  | T | T | T |
| 0.3584212836961336 | 0.0614107028812251 | 0.7182098661099784  | T | T | T |
| 0.3068234220574978 | 0.0657650824335304 | 0.8983062301916892  | T | T | T |
| 0.2028508981227038 | 0.0454028098424582 | 0.0197088120138985  | T | T | T |
| 0.1005027587963287 | 0.0689420415973925 | 0.8959888123496801  | T | T | T |
| 0.1048117670453771 | 0.0577426245125207 | 0.6986971037266310  | T | T | T |
| 0.2302276423581530 | 0.0316590465656758 | 0.7451710304250240  | T | T | T |
| 0.3600678611340424 | 0.8264075050728011 | 0.7481393469626308  | T | T | T |
| 0.3050192871933443 | 0.8410732640021208 | 0.9234786641067732  | T | T | T |
| 0.1889360142007612 | 0.8509562766350476 | 0.0177044537212517  | T | T | T |
| 0.0847914570841267 | 0.8304997911024967 | 0.9004576347842935  | T | T | T |
| 0.1055680495484220 | 0.8393091365234114 | 0.7050569317042223  | T | T | T |
| 0.2307956268317637 | 0.8553684122645060 | 0.7610605523479931  | T | T | T |
| 0.3231184084242318 | 0.9474476726740714 | 0.8068387704068292  | T | T | T |
| 0.0884807313970273 | 0.9498738887503595 | 0.8136469915945777  | T | T | T |
| 0.4320729369016834 | 0.1271024154313656 | 0.5861698853091443  | T | T | T |
| 0.4184266667805988 | 0.9953343086181018 | 0.5681681050710636  | T | T | T |
| 0.3977820856631130 | 0.8631773881663343 | 0.5654083866302287  | T | T | T |
| 0.2002693107722027 | 0.1295531562865896 | 0.6175087240023156  | T | T | T |
| 0.1831691574201617 | 0.0015149832022409 | 0.5639121329663219  | T | T | T |
| 0.1981103883800010 | 0.8674539305936475 | 0.5679358258640893  | T | T | T |
| 0.9907480062972456 | 0.0404361997941780 | 0.7890122685100853  | T | T | T |
| 0.9861089596338791 | 0.8679278112499268 | 0.7804799959876516  | T | T | T |
| 0.1431460430623445 | 0.9367581351516430 | 0.2177623406881597  | T | T | T |
| 0.1958972434068572 | 0.9322000710022509 | 0.3974238730040328  | T | T | T |
| 0.2996522231148582 | 0.9480135519968993 | 0.5213325538444090  | T | T | T |
| 0.4024926963237285 | 0.9295222206550231 | 0.3974861792703693  | T | T | T |
| 0.3975361005499376 | 0.9390706727952868 | 0.2005115197588864  | T | T | T |
| 0.2716573883689857 | 0.9662580600454886 | 0.2438653017887995  | T | T | T |
| 0.1414089738755381 | 0.1715961973545584 | 0.2471673838367305  | T | T | T |
| 0.1935555086576934 | 0.1564242609914623 | 0.42370444331437389 | T | T | T |
| 0.3110889202624941 | 0.1470897999547227 | 0.5123346131076375  | T | T | T |
| 0.4169471657289018 | 0.1678625792564029 | 0.3979369519656747  | T | T | T |
| 0.3955706199032976 | 0.1580043647004520 | 0.2034277813746137  | T | T | T |
| 0.2708381550039719 | 0.1437794370261925 | 0.2636084372211293  | T | T | T |
| 0.1787695940614915 | 0.0505153651668240 | 0.3056768393653645  | T | T | T |

**Structure files (CONTCAR) involved in this work:**

|                    |                    |                    |   |   |   |
|--------------------|--------------------|--------------------|---|---|---|
| 0.4171933156433711 | 0.0480094551182806 | 0.3121495907272404 | T | T | T |
| 0.0670925656147815 | 0.8697672661943290 | 0.0904577071206046 | T | T | T |
| 0.0831106825811085 | 0.9994853545258890 | 0.0636022706219311 | T | T | T |
| 0.1057183617939068 | 0.1306480274277418 | 0.0665210141378383 | T | T | T |
| 0.3022601335890491 | 0.8677679459054712 | 0.1174145993211971 | T | T | T |
| 0.3208842648143605 | 0.9956395166476215 | 0.0638117923798820 | T | T | T |
| 0.3010698908649641 | 0.1290104748125386 | 0.0700260772157166 | T | T | T |
| 0.5124195912995686 | 0.9546040152093436 | 0.2895836987351197 | T | T | T |
| 0.5165637440703487 | 0.1336666478658342 | 0.2781144106851743 | T | T | T |
| 0.6375422155154259 | 0.5610756493298579 | 0.2773799148492159 | T | T | T |
| 0.6964937336861403 | 0.5734740516840865 | 0.1044184208459257 | T | T | T |
| 0.7957159309008627 | 0.5563260585740638 | 0.9714095848024329 | T | T | T |
| 0.8968074670336171 | 0.5795236316760597 | 0.1000936738278024 | T | T | T |
| 0.8859809452526625 | 0.5437738301024890 | 0.3116826168225262 | T | T | T |
| 0.7619962580348506 | 0.5211920896734941 | 0.2571065835584404 | T | T | T |
| 0.6419948267301461 | 0.3338530043268931 | 0.2648240308538775 | T | T | T |
| 0.6912074243258777 | 0.3346266948480090 | 0.0830975830006382 | T | T | T |
| 0.8091746356951931 | 0.3511841801831052 | 0.9938086895112435 | T | T | T |
| 0.9141661510040016 | 0.3219182654056678 | 0.1091123098394320 | T | T | T |
| 0.9095568962907509 | 0.3553472995187940 | 0.3013653031522316 | T | T | T |
| 0.7691468870036614 | 0.3682404811454231 | 0.2377300343814832 | T | T | T |
| 0.6685399527397309 | 0.4489500044947051 | 0.1757414747198276 | T | T | T |
| 0.9288593821708416 | 0.4487049401524675 | 0.1569249787539368 | T | T | T |
| 0.5691690312986798 | 0.6273985392464602 | 0.4140143949309228 | T | T | T |
| 0.5901901342371708 | 0.4978882081958010 | 0.4393523220727753 | T | T | T |
| 0.5831767392984031 | 0.3641460678744492 | 0.4388716438318210 | T | T | T |
| 0.7923193300784610 | 0.6322198854189568 | 0.3626508121393480 | T | T | T |
| 0.7946423866461103 | 0.5161183852912656 | 0.4524734914003322 | T | T | T |
| 0.8257577552552868 | 0.3886136663109553 | 0.4329024673384591 | T | T | T |
| 0.0137737700376992 | 0.5546549059730167 | 0.2277285394537871 | T | T | T |
| 0.0240255122248779 | 0.3625473508140930 | 0.2047516184486515 | T | T | T |
| 0.8562404070220386 | 0.4340747488451265 | 0.7852183284940365 | T | T | T |
| 0.7923538629630118 | 0.4347163316555184 | 0.6103037724182457 | T | T | T |
| 0.6984315909913663 | 0.4238032571709814 | 0.4685159026344414 | T | T | T |
| 0.6031040243366267 | 0.4289179301371542 | 0.6076924861912303 | T | T | T |
| 0.6034726943962317 | 0.4425049493570994 | 0.8046432040825533 | T | T | T |
| 0.7292036201531488 | 0.4751593853082274 | 0.7712260883845463 | T | T | T |
| 0.8611199829595807 | 0.6832287491750021 | 0.7453272524295564 | T | T | T |
| 0.8151474134120884 | 0.6424542508218913 | 0.5569479047918070 | T | T | T |
| 0.6906619863738890 | 0.6479630948712585 | 0.4901485857758763 | T | T | T |
| 0.5829282501524352 | 0.6684800398747162 | 0.6012121462034741 | T | T | T |
| 0.5965679412976408 | 0.6590212259255955 | 0.7977431893834384 | T | T | T |
| 0.7208684306621626 | 0.6480363397764227 | 0.7332825476951726 | T | T | T |
| 0.8270314377781104 | 0.5490119439210389 | 0.6920384760878630 | T | T | T |
| 0.5820393479310049 | 0.5482492619720293 | 0.6860670100039654 | T | T | T |
| 0.9305617767569054 | 0.3772572644625815 | 0.9264934385533554 | T | T | T |
| 0.9144661716236121 | 0.5100551010159134 | 0.9288769679299581 | T | T | T |
| 0.8951418276522175 | 0.6409438005245576 | 0.9276809052090040 | T | T | T |
| 0.6981367028472649 | 0.3727624939210234 | 0.8921621233765141 | T | T | T |
| 0.6763223736322727 | 0.5006311854628164 | 0.9462627409270923 | T | T | T |
| 0.6920314041671968 | 0.6343095158070950 | 0.9297047263262269 | T | T | T |
| 0.4900402487611557 | 0.4518860876222795 | 0.7106289845836569 | T | T | T |
| 0.4802108920423543 | 0.6314935990673242 | 0.7127981847936038 | T | T | T |

**Structure files (CONTCAR) involved in this work:**

|                    |                    |                    |   |   |   |
|--------------------|--------------------|--------------------|---|---|---|
| 0.6434417888875109 | 0.9392330319155592 | 0.2866316601827812 | T | T | T |
| 0.7000263256849063 | 0.9326914319059606 | 0.1092399755845921 | T | T | T |
| 0.8021030046520858 | 0.9437723015040503 | 0.9805189144058436 | T | T | T |
| 0.9012054425221655 | 0.9291365027599298 | 0.1125934479504496 | T | T | T |
| 0.8985745076066515 | 0.9461558250590983 | 0.3099215296809398 | T | T | T |
| 0.7721406194284788 | 0.9665213088456479 | 0.2659448284831276 | T | T | T |
| 0.6418665529880838 | 0.1723127878218188 | 0.2529568290796589 | T | T | T |
| 0.6973061582343948 | 0.1572740866195858 | 0.0783128084890769 | T | T | T |
| 0.8111429994121052 | 0.1468438914051189 | 0.9792475619026189 | T | T | T |
| 0.9148685710842990 | 0.1679774058209027 | 0.0980898628762464 | T | T | T |
| 0.8973038772606831 | 0.1591303480984888 | 0.2953073256577934 | T | T | T |
| 0.7720407743413884 | 0.1446321480811718 | 0.2417539341471152 | T | T | T |
| 0.6812635130567034 | 0.0516737966397335 | 0.1967759971182848 | T | T | T |
| 0.9189046952759634 | 0.0495693053954894 | 0.1863187707978841 | T | T | T |
| 0.5703791072671571 | 0.8750636101894441 | 0.4211164369914044 | T | T | T |
| 0.5839048072979841 | 0.0064392010364147 | 0.4370018062907632 | T | T | T |
| 0.6004939382762262 | 0.1382074006989438 | 0.4353101166061183 | T | T | T |
| 0.8083779211773667 | 0.8706676259481541 | 0.3959614652020672 | T | T | T |
| 0.8180125439922811 | 0.9991916348706641 | 0.4463004808996631 | T | T | T |
| 0.8061205344054798 | 0.1331213929190594 | 0.4340500949259172 | T | T | T |
| 0.0123110192011513 | 0.9553816981010609 | 0.2175544781970134 | T | T | T |
| 0.0163116566616286 | 0.1374097067056133 | 0.2163822128526209 | T | T | T |
| 0.8599435168106523 | 0.0555974390894808 | 0.7851370063213824 | T | T | T |
| 0.8042755473683122 | 0.0722596509258259 | 0.6082828974786502 | T | T | T |
| 0.7018892462402522 | 0.0568460687131098 | 0.4814820370279775 | T | T | T |
| 0.5995370858335958 | 0.0744641007634288 | 0.6068418054125165 | T | T | T |
| 0.6050418557302575 | 0.0513379289197882 | 0.8039663337507903 | T | T | T |
| 0.7308788389165052 | 0.0301172577668505 | 0.7601318926856374 | T | T | T |
| 0.8587748847557006 | 0.8350520033409423 | 0.7665396332410539 | T | T | T |
| 0.8060767764495488 | 0.8329704705214684 | 0.5881255252383962 | T | T | T |
| 0.6928368760924709 | 0.8520057065208883 | 0.4881200552944872 | T | T | T |
| 0.5887332717633180 | 0.8283616355816918 | 0.6062692205856542 | T | T | T |
| 0.6034195118472159 | 0.8517287560914468 | 0.8007416937009575 | T | T | T |
| 0.7294272748264597 | 0.8597386883541903 | 0.7451851355896191 | T | T | T |
| 0.8199098033620396 | 0.9487843743664528 | 0.6816312579707051 | T | T | T |
| 0.5803324533752485 | 0.9522621354919985 | 0.6737788381177829 | T | T | T |
| 0.9334882271959505 | 0.1277886018729186 | 0.9099801470496502 | T | T | T |
| 0.9194135009344118 | 0.9978496145133017 | 0.9434823824517647 | T | T | T |
| 0.9078098220438622 | 0.8650901500040930 | 0.9439571626388495 | T | T | T |
| 0.6962570671148492 | 0.1293536968280588 | 0.8843085661504729 | T | T | T |
| 0.6863650763940992 | 0.0023122008009685 | 0.9430723180106800 | T | T | T |
| 0.6971015686554042 | 0.8679812199906615 | 0.9388188717870857 | T | T | T |
| 0.4900019754303361 | 0.0467399741579081 | 0.7156889684844742 | T | T | T |
| 0.4847081423036529 | 0.8637782320013805 | 0.7175878279184698 | T | T | T |
| 0.3585164834361944 | 0.4369408019083685 | 0.7149712196838046 | T | T | T |
| 0.3022447360990608 | 0.4302081438511765 | 0.8933052562834778 | T | T | T |
| 0.2000483766226794 | 0.4581232890915972 | 0.0164853378377950 | T | T | T |
| 0.0951546057690139 | 0.4335278749309623 | 0.8984596848408007 | T | T | T |
| 0.1024293900923921 | 0.4412555665917227 | 0.6999159722161444 | T | T | T |
| 0.2295072543564932 | 0.4678841970955672 | 0.7391156657642678 | T | T | T |
| 0.3557860095015667 | 0.6708313453910494 | 0.7405486369959554 | T | T | T |
| 0.3036767417301302 | 0.6580981419284512 | 0.9176496447151354 | T | T | T |
| 0.1891407202194389 | 0.6448949452716033 | 0.0130368924610915 | T | T | T |

**Structure files (CONTCAR) involved in this work:**

|                    |                    |                    |   |   |   |
|--------------------|--------------------|--------------------|---|---|---|
| 0.0852112401446680 | 0.6689691682182937 | 0.8949840126641109 | T | T | T |
| 0.1033205584020065 | 0.6579568254994335 | 0.6994558125165257 | T | T | T |
| 0.2279599696146182 | 0.6381292055491304 | 0.7562802752932246 | T | T | T |
| 0.3224682576876258 | 0.5496825744197471 | 0.8065753284755296 | T | T | T |
| 0.0797119046000017 | 0.5496525921655017 | 0.8099238287763421 | T | T | T |
| 0.4315746296074613 | 0.3752162085156827 | 0.5761536816632207 | T | T | T |
| 0.4179009580619689 | 0.5067568264772562 | 0.5671297185912928 | T | T | T |
| 0.3947693134995600 | 0.6378926287283803 | 0.5581682660302738 | T | T | T |
| 0.1966527624030202 | 0.3698491815368268 | 0.6135636288163155 | T | T | T |
| 0.1775211685443103 | 0.4978294887415378 | 0.5612581632028175 | T | T | T |
| 0.1950628976395663 | 0.6314274376786492 | 0.5620729438325168 | T | T | T |
| 0.9861960089448295 | 0.4536158412683489 | 0.7864597419142739 | T | T | T |
| 0.9830017024284654 | 0.6378501713867739 | 0.7761797715723309 | T | T | T |
| 0.1460401875672641 | 0.5618148736032862 | 0.2144170938166575 | T | T | T |
| 0.1968136789698947 | 0.5637551874605892 | 0.3936029605052089 | T | T | T |
| 0.2969450604952291 | 0.5491083223210118 | 0.5246425529746611 | T | T | T |
| 0.3953685506921120 | 0.5679857258956531 | 0.3932508476059256 | T | T | T |
| 0.3979757071267794 | 0.5561310339174240 | 0.1962310359821683 | T | T | T |
| 0.2729410519154588 | 0.5284952813086983 | 0.2391189271043332 | T | T | T |
| 0.1458804270673386 | 0.3224877967899005 | 0.2410329293783966 | T | T | T |
| 0.1925300471056387 | 0.3415044856548239 | 0.4209448510709373 | T | T | T |
| 0.3094321229858568 | 0.3529732678095751 | 0.5111761346116096 | T | T | T |
| 0.4119404277467583 | 0.3276052515665698 | 0.3905655807101688 | T | T | T |
| 0.3936395224439187 | 0.3433196165386199 | 0.1938410893396986 | T | T | T |
| 0.2724733290141989 | 0.3552715932587946 | 0.2631555223418562 | T | T | T |
| 0.1773200475103868 | 0.4460113808123442 | 0.3003546970591478 | T | T | T |
| 0.4139344116336163 | 0.4486213466293522 | 0.3132282928905313 | T | T | T |
| 0.0679873352809425 | 0.6228805190086302 | 0.0806745871880495 | T | T | T |
| 0.0780916472374655 | 0.4894838078822832 | 0.0783762261739420 | T | T | T |
| 0.1133333113467357 | 0.3608278378918742 | 0.0575329174713119 | T | T | T |
| 0.3025412541163462 | 0.6269651219960971 | 0.1111990050329220 | T | T | T |
| 0.3215339845045801 | 0.4990595224561198 | 0.0589525559551336 | T | T | T |
| 0.2931461732031700 | 0.3674555310059620 | 0.0662265815015550 | T | T | T |
| 0.5090016807332777 | 0.5409120725920810 | 0.2951028820279537 | T | T | T |
| 0.5126529231085958 | 0.3622413823029392 | 0.2709793312146749 | T | T | T |
| 0.4390820939598903 | 0.7490788078132087 | 0.6403688624224974 | T | T | T |
| 0.1965803948642825 | 0.7485067086610745 | 0.6517414273969524 | T | T | T |
| 0.2699460585734561 | 0.7479040517876252 | 0.0556697020173442 | T | T | T |
| 0.1065617502688465 | 0.7474561561639889 | 0.0507112496541756 | T | T | T |
| 0.0667840991643397 | 0.2470645220151144 | 0.1292238192818941 | T | T | T |
| 0.3038741321213564 | 0.2488038685767484 | 0.1495089731744796 | T | T | T |
| 0.2295367318277760 | 0.2496765213369895 | 0.5548243653436183 | T | T | T |
| 0.3925343679380786 | 0.2505085996284705 | 0.5476890793583549 | T | T | T |
| 0.5580332810524438 | 0.2495088374117760 | 0.3532022601590408 | T | T | T |
| 0.8085005795709569 | 0.2523540755091268 | 0.3501161953905393 | T | T | T |
| 0.7288417276174126 | 0.2497299188388649 | 0.9417393795727513 | T | T | T |
| 0.8927115411787655 | 0.2509611078907125 | 0.9471711478733820 | T | T | T |
| 0.9449161227190311 | 0.7530688349695434 | 0.8581425184186281 | T | T | T |
| 0.6864828784298095 | 0.7524140338136495 | 0.8476864624090634 | T | T | T |
| 0.7740384651519274 | 0.7488635544237201 | 0.4459414458131077 | T | T | T |
| 0.6094081639600112 | 0.7504470822788837 | 0.4505729797226042 | T | T | T |
| 0.9330263395683706 | 0.4891239498074954 | 0.5178769324282170 | T | T | T |
| 0.8235315191256899 | 0.3353749537988105 | 0.3255005963774757 | T | T | T |



**Structure files (CONTCAR) involved in this work:**

|                    |                    |                    |   |   |   |
|--------------------|--------------------|--------------------|---|---|---|
| 0.8004237897956825 | 0.6357389371505769 | 0.6908264965144718 | T | T | T |
| 0.9241884518338386 | 0.5297545186778064 | 0.1964724295679034 | T | T | T |
| 0.9275093416391615 | 0.4170127245126165 | 0.4163161230647350 | T | T | T |
| 0.8679848654424355 | 0.5543212252081853 | 0.5520027473496417 | T | T | T |
| 0.9884310445489261 | 0.6360626631179533 | 0.3205519140092568 | T | T | T |
| 0.0043162410272206 | 0.5570005249680677 | 0.3830466530817156 | T | T | T |
| 0.9608774918543849 | 0.4744968245209109 | 0.5736441479118101 | T | T | T |
| 0.0727488042086131 | 0.6061450377248754 | 0.3341227346031567 | T | T | T |
| 0.0446786057173022 | 0.4311259337908371 | 0.4805879890089514 | T | T | T |
| 0.0368288604098626 | 0.3611426155700204 | 0.3904501178981814 | T | T | T |
| 0.0205362138441317 | 0.5915083373366334 | 0.3239575065954312 | T | T | T |
| 0.0119165746068783 | 0.4033955626828489 | 0.4282507236231193 | T | T | T |

**Figure S17 ZnCo-TS**

Si O Al Co Zn H C

1.0000000000000000

20.0219999999999985 0.0000000000000000 0.0000000000000000

0.0000000000000000 19.8990000000000009 0.0000000000000000

0.0000000000000000 0.0000000000000000 13.3829999999999991

93 193 3 1 1 6 2

Selective dynamics

Direct

|                    |                    |                    |   |   |   |
|--------------------|--------------------|--------------------|---|---|---|
| 0.4240386843057620 | 0.0567007171092800 | 0.6465131041726916 | T | T | T |
| 0.3044536069955807 | 0.0255433325703835 | 0.7908484330263210 | T | T | T |
| 0.2829320357689778 | 0.0583319815016219 | 0.0125585417660983 | T | T | T |
| 0.1236123598593646 | 0.0603772821074396 | 0.0107499392206842 | T | T | T |
| 0.0705794339465720 | 0.0283217871039458 | 0.7996848335911447 | T | T | T |
| 0.1798620091793600 | 0.0548492793923083 | 0.6546826677509077 | T | T | T |
| 0.4207667334348023 | 0.8262644563694352 | 0.6671525390507657 | T | T | T |
| 0.3042371444733721 | 0.8669506707956758 | 0.8088564547450278 | T | T | T |
| 0.2671346706720379 | 0.8262461311911740 | 0.0276134174309755 | T | T | T |
| 0.1126283418450320 | 0.8238345437744422 | 0.0138985413792934 | T | T | T |
| 0.0665557648644777 | 0.8714814610409021 | 0.8000107816335001 | T | T | T |
| 0.1825452755294478 | 0.8269014314818773 | 0.6703177883959873 | T | T | T |
| 0.0776101146851121 | 0.9401314105411139 | 0.1471368372551185 | T | T | T |
| 0.1975683148277891 | 0.9713606771427328 | 0.2902609990371314 | T | T | T |
| 0.2190745455065924 | 0.9370739883607588 | 0.5125826800732953 | T | T | T |
| 0.3787152123250547 | 0.9344207138483536 | 0.5123256970758026 | T | T | T |
| 0.4327571140065833 | 0.9678009214041808 | 0.3007546693639291 | T | T | T |
| 0.3226720392461909 | 0.9416638926386406 | 0.1551970980728962 | T | T | T |
| 0.0822727082660164 | 0.1711523517942548 | 0.1636849946907479 | T | T | T |
| 0.1967150463615769 | 0.1297403812931333 | 0.3079945046251487 | T | T | T |
| 0.2333684971312403 | 0.1704727305052331 | 0.5254504822005602 | T | T | T |
| 0.3878939412075352 | 0.1728988402723276 | 0.5107426592769694 | T | T | T |
| 0.4364980337252065 | 0.1261587783335354 | 0.2980675430647641 | T | T | T |
| 0.3181590546737831 | 0.1689557591769399 | 0.1706936833373811 | T | T | T |
| 0.5776670615863549 | 0.5550492065761684 | 0.3545407351600440 | T | T | T |
| 0.6905772054852712 | 0.5259919678524367 | 0.2011058636392591 | T | T | T |
| 0.7162696243914527 | 0.5666137737800945 | 0.9846106631894315 | T | T | T |
| 0.8739331297468449 | 0.5717879630136252 | 0.9893742680498637 | T | T | T |
| 0.8113119342577476 | 0.5485809954280656 | 0.3457363697074490 | T | T | T |
| 0.5739060743258017 | 0.3275143381930803 | 0.3306155473522073 | T | T | T |
| 0.6951976460013870 | 0.3715214047809242 | 0.1929929084772293 | T | T | T |
| 0.7304354525917068 | 0.3263587975867021 | 0.9790684107184969 | T | T | T |

**Structure files (CONTCAR) involved in this work:**

|                    |                    |                    |   |   |   |
|--------------------|--------------------|--------------------|---|---|---|
| 0.8846895149493256 | 0.3246145432343852 | 0.9930505894315534 | T | T | T |
| 0.9408059689736982 | 0.3749069072608941 | 0.1839134761533810 | T | T | T |
| 0.9217628437521265 | 0.4451787794161974 | 0.8638647006517184 | T | T | T |
| 0.8011840518283966 | 0.4717582842708931 | 0.7216751035599913 | T | T | T |
| 0.7770451307406199 | 0.4359584352945043 | 0.4972116912310847 | T | T | T |
| 0.6198483993114103 | 0.4277872897911884 | 0.4890158337374196 | T | T | T |
| 0.5687752013492802 | 0.4685759076092794 | 0.7009559270888975 | T | T | T |
| 0.6752280025289772 | 0.4462246222204521 | 0.8559607528768367 | T | T | T |
| 0.9208436299716799 | 0.6770349247046894 | 0.8320711585260785 | T | T | T |
| 0.7711650677760341 | 0.6687152633016000 | 0.4631527140775094 | T | T | T |
| 0.6158266634074478 | 0.6722300414629626 | 0.4865565308948509 | T | T | T |
| 0.5622393746198965 | 0.6267616299429336 | 0.6975690711006710 | T | T | T |
| 0.6734803315603471 | 0.6734192175672176 | 0.8268888084023646 | T | T | T |
| 0.5785484418980761 | 0.9442417108649849 | 0.3589287111880194 | T | T | T |
| 0.6996263790440964 | 0.9731614608200013 | 0.2157143103632717 | T | T | T |
| 0.7213419932116056 | 0.9369563180641415 | 0.9935166260811749 | T | T | T |
| 0.8816303828438192 | 0.9336634635347056 | 0.9957057938847639 | T | T | T |
| 0.9336674919115049 | 0.9697410799570926 | 0.2054830302257151 | T | T | T |
| 0.8244320600056646 | 0.9461131252393691 | 0.3553527657747275 | T | T | T |
| 0.5791178997221429 | 0.1727213894600140 | 0.3298860410873281 | T | T | T |
| 0.6993469237187974 | 0.1321993299668251 | 0.1940846963966550 | T | T | T |
| 0.7328570090043013 | 0.1702733983865867 | 0.9721695466536473 | T | T | T |
| 0.8875137723019489 | 0.1725364504064547 | 0.9831563159791059 | T | T | T |
| 0.9368263834869909 | 0.1279297487525048 | 0.1975187285932503 | T | T | T |
| 0.8219625907936793 | 0.1746724528892388 | 0.3313669546446708 | T | T | T |
| 0.9248949843028725 | 0.0535496601708854 | 0.8562754491164114 | T | T | T |
| 0.8036774719129395 | 0.0252402015401123 | 0.7084814566969083 | T | T | T |
| 0.7825475967991408 | 0.0664196035095032 | 0.4913978673567365 | T | T | T |
| 0.6222805871589191 | 0.0688352622187877 | 0.4902852834423776 | T | T | T |
| 0.5692561012333726 | 0.0307866522162776 | 0.6987926742868920 | T | T | T |
| 0.6800483735572767 | 0.0526346358812744 | 0.8486292216452445 | T | T | T |
| 0.9243557159013794 | 0.8295272370864193 | 0.8374789234207289 | T | T | T |
| 0.8032866853835695 | 0.8678892127783425 | 0.6961857855979110 | T | T | T |
| 0.7715697135153867 | 0.8258102055238551 | 0.4791517787619954 | T | T | T |
| 0.6164959699205304 | 0.8258786369386953 | 0.4911634692062148 | T | T | T |
| 0.5650379207698666 | 0.8739378627640026 | 0.6985212053758475 | T | T | T |
| 0.6793349544181121 | 0.8322726486284914 | 0.8337695487606160 | T | T | T |
| 0.4238387651950783 | 0.4438186406015455 | 0.6384137085231196 | T | T | T |
| 0.3037740974937220 | 0.4709695027196308 | 0.7843481458113450 | T | T | T |
| 0.2826024725198709 | 0.4361931387499148 | 0.0038115217891525 | T | T | T |
| 0.1252410612738197 | 0.4347728766243056 | 0.0073539090078545 | T | T | T |
| 0.0662218666666292 | 0.4692731105368279 | 0.7990618956575091 | T | T | T |
| 0.1766502484941791 | 0.4441641403232167 | 0.6509336130271643 | T | T | T |
| 0.4183557754684538 | 0.6723491017725326 | 0.6595216455977012 | T | T | T |
| 0.3022402882992773 | 0.6287928776594945 | 0.8021288789500001 | T | T | T |
| 0.2676295693655522 | 0.6691233498766086 | 0.0214285116770276 | T | T | T |
| 0.1132904101660200 | 0.6699636539549851 | 0.0084651171750090 | T | T | T |
| 0.0633173830083129 | 0.6279309420805356 | 0.7962069648717595 | T | T | T |
| 0.1803729629937913 | 0.6684993010715236 | 0.6652608364705149 | T | T | T |
| 0.0749248780488407 | 0.5539379621799639 | 0.1461102799720780 | T | T | T |
| 0.1977388456811058 | 0.5249756805401984 | 0.2834854273322275 | T | T | T |
| 0.2180928137545906 | 0.5604149698877386 | 0.5085924551509085 | T | T | T |
| 0.3761597184787479 | 0.5658397993964734 | 0.5081693007984736 | T | T | T |

**Structure files (CONTCAR) involved in this work:**

|                    |                    |                    |   |   |   |
|--------------------|--------------------|--------------------|---|---|---|
| 0.4283870671909632 | 0.5268023046201477 | 0.2998876974296357 | T | T | T |
| 0.3238413282682300 | 0.5512797890075984 | 0.1463444755109400 | T | T | T |
| 0.0861765837722685 | 0.3241278312589291 | 0.1538837734902397 | T | T | T |
| 0.1961566741246626 | 0.3670903149349952 | 0.3042555354931735 | T | T | T |
| 0.2317201914196014 | 0.3278932673496277 | 0.5233156440489182 | T | T | T |
| 0.3858315735002643 | 0.3263042889013444 | 0.5050637855549232 | T | T | T |
| 0.4317715279986564 | 0.3697729724983029 | 0.2922710092969667 | T | T | T |
| 0.3154676781486189 | 0.3273212138846972 | 0.1640316911306079 | T | T | T |
| 0.3585763286478194 | 0.0603997552471946 | 0.7174177438101659 | T | T | T |
| 0.3066600973272538 | 0.0646833821268349 | 0.8971295273826388 | T | T | T |
| 0.2029848898232278 | 0.0450083894551447 | 0.0193317229643808 | T | T | T |
| 0.1004862483334885 | 0.0683065864485816 | 0.8955627204398823 | T | T | T |
| 0.1043406238858026 | 0.0575877214500703 | 0.6983710492732734 | T | T | T |
| 0.2300186379638063 | 0.0315869179099419 | 0.7437295037136586 | T | T | T |
| 0.3608626831458844 | 0.8256928001123284 | 0.7483703462190519 | T | T | T |
| 0.3055200537338637 | 0.8411805575030521 | 0.9233129759613997 | T | T | T |
| 0.1897004885405555 | 0.8502901557346761 | 0.0177700587814178 | T | T | T |
| 0.0857254260398789 | 0.8299245232827994 | 0.9002155757084592 | T | T | T |
| 0.1053471171435854 | 0.8388803585467978 | 0.7044918261365705 | T | T | T |
| 0.2309873497772181 | 0.8528224249889115 | 0.7603550908889454 | T | T | T |
| 0.3221575141329089 | 0.9464636841232178 | 0.8046088285559760 | T | T | T |
| 0.0890683328894215 | 0.9492907440680100 | 0.8130937809521120 | T | T | T |
| 0.4318866652767507 | 0.1271494738560323 | 0.5862188952775780 | T | T | T |
| 0.4185705741352883 | 0.9955127275535678 | 0.5662851493955894 | T | T | T |
| 0.3969216762498848 | 0.8635886811025094 | 0.5654354994188708 | T | T | T |
| 0.1993461280043794 | 0.1294449460340223 | 0.6163388767800290 | T | T | T |
| 0.1822011121965279 | 0.0014237545374987 | 0.5629236016334703 | T | T | T |
| 0.1980454677561073 | 0.8675780370736773 | 0.5677267498923753 | T | T | T |
| 0.9906858419837040 | 0.0392157228263455 | 0.7890207665138476 | T | T | T |
| 0.9863400248672105 | 0.8676452590326861 | 0.7817602948707976 | T | T | T |
| 0.1438620113886814 | 0.9360551228978189 | 0.2166107935395665 | T | T | T |
| 0.1960374741412728 | 0.9322434259485504 | 0.3966655778560250 | T | T | T |
| 0.2991806449013913 | 0.9487557587215263 | 0.5212415286826371 | T | T | T |
| 0.4016027803979641 | 0.9288224576603635 | 0.3967520403769787 | T | T | T |
| 0.3979886234100069 | 0.9392084332576210 | 0.1998004975974026 | T | T | T |
| 0.2721139954458776 | 0.9661529231157105 | 0.2432269768834587 | T | T | T |
| 0.1417903525468856 | 0.1719214567277468 | 0.2456301454910706 | T | T | T |
| 0.1935412152099756 | 0.1559106851484405 | 0.4223259075703444 | T | T | T |
| 0.3107083177545170 | 0.1469618545053356 | 0.5123451449384669 | T | T | T |
| 0.4166259016773795 | 0.1677079837439359 | 0.3980685983208516 | T | T | T |
| 0.3957474488152579 | 0.1573790960870533 | 0.2033021107754323 | T | T | T |
| 0.2709630545394966 | 0.1432036232388934 | 0.2624343391385520 | T | T | T |
| 0.1785327860752324 | 0.0502539729727559 | 0.3038237922645804 | T | T | T |
| 0.4172369461650903 | 0.0476155764215263 | 0.3129649643677654 | T | T | T |
| 0.0677193969762099 | 0.8689541092472962 | 0.0894357026754786 | T | T | T |
| 0.0832273512734660 | 0.9992181132412332 | 0.0634830816106577 | T | T | T |
| 0.1059522637939088 | 0.1306089148104488 | 0.0651798161485323 | T | T | T |
| 0.3029115128828246 | 0.8669465416262128 | 0.1175857682409932 | T | T | T |
| 0.3209756966409694 | 0.9945521740407564 | 0.0626003491795773 | T | T | T |
| 0.3019090310014154 | 0.1278161676547448 | 0.0689963182432840 | T | T | T |
| 0.5123210154843499 | 0.9540035459163563 | 0.2907124439441998 | T | T | T |
| 0.5163811157063819 | 0.1333065466817428 | 0.2785098500363947 | T | T | T |
| 0.6351760064145637 | 0.5624358274299316 | 0.2704527929683485 | T | T | T |

**Structure files (CONTCAR) involved in this work:**

|                    |                    |                    |   |   |   |
|--------------------|--------------------|--------------------|---|---|---|
| 0.7017516372866670 | 0.5726299881215777 | 0.1036945536197674 | T | T | T |
| 0.7953145518471064 | 0.5575341878130565 | 0.9606011634856105 | T | T | T |
| 0.8849195163341100 | 0.5777281835618999 | 0.1077480182420889 | T | T | T |
| 0.8867854783896627 | 0.5249735269258831 | 0.3178027583134900 | T | T | T |
| 0.7602777562929606 | 0.5222411138604183 | 0.2634065945012420 | T | T | T |
| 0.6408884288814081 | 0.3346388992788829 | 0.2649176026972883 | T | T | T |
| 0.6922976901519746 | 0.3335802992844710 | 0.0851709724295572 | T | T | T |
| 0.8078139726862956 | 0.3510267384259078 | 0.9892601558878197 | T | T | T |
| 0.9093220062010227 | 0.3183350603383523 | 0.1092112368933929 | T | T | T |
| 0.9098654113307147 | 0.3627448354162381 | 0.2983977791433903 | T | T | T |
| 0.7683917948848870 | 0.3684198354639179 | 0.2413520669622855 | T | T | T |
| 0.6700925103262048 | 0.4492428658790272 | 0.1752452415903714 | T | T | T |
| 0.9207271927174949 | 0.4474839243074900 | 0.1460410074162877 | T | T | T |
| 0.5702891106747199 | 0.6259688164740815 | 0.4135460431138981 | T | T | T |
| 0.5969975968224113 | 0.4971379539786792 | 0.4354601733958274 | T | T | T |
| 0.5828195753325640 | 0.3640116424924751 | 0.4390659495060567 | T | T | T |
| 0.8044039887883802 | 0.6289087187548590 | 0.3680040552559230 | T | T | T |
| 0.7928026082652077 | 0.5148159640489824 | 0.4584838062292944 | T | T | T |
| 0.8291583306935474 | 0.3897993351411790 | 0.4346967763126124 | T | T | T |
| 0.0101706143121008 | 0.5466533780969649 | 0.2152847229698226 | T | T | T |
| 0.0210181082354113 | 0.3640218501177231 | 0.1940357528564425 | T | T | T |
| 0.8569115170964302 | 0.4356356494033179 | 0.7904435862825108 | T | T | T |
| 0.7954077450410624 | 0.4321518639434235 | 0.6147070788276062 | T | T | T |
| 0.7005128038860188 | 0.4178940039995040 | 0.4734973089660341 | T | T | T |
| 0.6030966994981687 | 0.4294109964132554 | 0.6070524015028456 | T | T | T |
| 0.6019998046338180 | 0.4424369265246581 | 0.8044454197241399 | T | T | T |
| 0.7283843105430874 | 0.4726070982828923 | 0.7719925582671212 | T | T | T |
| 0.8606927827968083 | 0.6804876980712444 | 0.7537722991721625 | T | T | T |
| 0.8150917156851644 | 0.6444669550369835 | 0.5619605734411277 | T | T | T |
| 0.6937375847532109 | 0.6466342284037581 | 0.4804379167896301 | T | T | T |
| 0.5885274867627410 | 0.6672351990974497 | 0.5997396629423259 | T | T | T |
| 0.5951728448250307 | 0.6599325312857532 | 0.7969089176477332 | T | T | T |
| 0.7195812310224994 | 0.6485215352443768 | 0.7350595787133818 | T | T | T |
| 0.8250554660912698 | 0.5486486114446975 | 0.6939832694693761 | T | T | T |
| 0.5828507318951415 | 0.5482057799480914 | 0.6860913670891656 | T | T | T |
| 0.9308783156046092 | 0.3766330798617690 | 0.9291427774724176 | T | T | T |
| 0.9156003704198568 | 0.5101175360486954 | 0.9356008574320172 | T | T | T |
| 0.8989864735484010 | 0.6408081734086500 | 0.9358173071472977 | T | T | T |
| 0.6943118994675739 | 0.3716464468757495 | 0.8940252823579219 | T | T | T |
| 0.6755614939111599 | 0.5001997027131626 | 0.9465324500518518 | T | T | T |
| 0.6889004781515967 | 0.6338639456045826 | 0.9307831790359671 | T | T | T |
| 0.4895127554618725 | 0.4522431874421404 | 0.7081161455931035 | T | T | T |
| 0.4814256406548247 | 0.6318148795363470 | 0.7064455655845191 | T | T | T |
| 0.6435715859012840 | 0.9395882939205019 | 0.2873492991288534 | T | T | T |
| 0.6996648775335690 | 0.9332776941749640 | 0.1100436745500101 | T | T | T |
| 0.8018020395605037 | 0.9441445658385291 | 0.9816173941318536 | T | T | T |
| 0.9011715756741498 | 0.9280829760917724 | 0.1129238878080014 | T | T | T |
| 0.8995641321473237 | 0.9468569976922221 | 0.3100337986428831 | T | T | T |
| 0.7727183148521313 | 0.9653469772554187 | 0.2664513834004550 | T | T | T |
| 0.6413843132689049 | 0.1728032514790512 | 0.2530073172758831 | T | T | T |
| 0.6970541658204268 | 0.1564802216487624 | 0.0787310051105954 | T | T | T |
| 0.8105103332381347 | 0.1461628355757388 | 0.9791030373527987 | T | T | T |
| 0.9147043780126988 | 0.1675210720486777 | 0.0968045137631621 | T | T | T |

**Structure files (CONTCAR) involved in this work:**

|                    |                    |                    |   |   |   |
|--------------------|--------------------|--------------------|---|---|---|
| 0.8980066935518946 | 0.1572153170206874 | 0.2944642537080126 | T | T | T |
| 0.7718204455118265 | 0.1480646427613018 | 0.2428161304684603 | T | T | T |
| 0.6831018525401549 | 0.0522277313561703 | 0.1998440225629106 | T | T | T |
| 0.9202093198055528 | 0.0487698168069928 | 0.1838133460982168 | T | T | T |
| 0.5712821736965465 | 0.8744707515308840 | 0.4214150883530747 | T | T | T |
| 0.5838525154485599 | 0.0061926024255462 | 0.4376772996530799 | T | T | T |
| 0.6005118211085949 | 0.1381814219649782 | 0.4353145985023142 | T | T | T |
| 0.8104742562591325 | 0.8710010088271873 | 0.3976772943964232 | T | T | T |
| 0.8189172137326278 | 1.0001725286033447 | 0.4455426436200026 | T | T | T |
| 0.8063420692954280 | 0.1340131792105219 | 0.4347119017162843 | T | T | T |
| 0.0129727921938541 | 0.9542252114959449 | 0.2168672550792395 | T | T | T |
| 0.0167027649080717 | 0.1377393211611392 | 0.2148145169423759 | T | T | T |
| 0.8599099821734522 | 0.0533489327247564 | 0.7844606975084706 | T | T | T |
| 0.8035776567266698 | 0.0716287002952419 | 0.6085356580704168 | T | T | T |
| 0.7021314801346609 | 0.0569085357977193 | 0.4800513976530846 | T | T | T |
| 0.6003938767278503 | 0.0744455526087851 | 0.6068869404299140 | T | T | T |
| 0.6048199503283617 | 0.0504713085612247 | 0.8036610873622021 | T | T | T |
| 0.7307159311937290 | 0.0288857910372848 | 0.7607425964987139 | T | T | T |
| 0.8595959513044646 | 0.8340048343163045 | 0.7657412521616768 | T | T | T |
| 0.8060116394374992 | 0.8302899294090669 | 0.5885308043794374 | T | T | T |
| 0.6941807961336514 | 0.8504044571535997 | 0.4863151706837401 | T | T | T |
| 0.5903597645946888 | 0.8275000994844863 | 0.6058707673542044 | T | T | T |
| 0.6035372233985542 | 0.8519964969532201 | 0.8002506197257283 | T | T | T |
| 0.7298887893556188 | 0.8577961622152682 | 0.7458949825980187 | T | T | T |
| 0.8186938909088137 | 0.9473012980985233 | 0.6797845178509864 | T | T | T |
| 0.5809445087865560 | 0.9518910382247492 | 0.6720218378566423 | T | T | T |
| 0.9326863659719378 | 0.1269688377967936 | 0.9085207054412822 | T | T | T |
| 0.9193786893817375 | 0.9972452167286293 | 0.9441140937642727 | T | T | T |
| 0.9065621922510975 | 0.8645466505105827 | 0.9438312305469015 | T | T | T |
| 0.6956997922210411 | 0.1288622577422162 | 0.8840215453659322 | T | T | T |
| 0.6858674217407634 | 0.0024915690982077 | 0.9440049096164015 | T | T | T |
| 0.6968140490803252 | 0.8684594472610917 | 0.9392326072984261 | T | T | T |
| 0.4902420462615467 | 0.0461537381897503 | 0.7142955292523422 | T | T | T |
| 0.4853125683465661 | 0.8636187975711093 | 0.7156167052918878 | T | T | T |
| 0.3575714738935389 | 0.4384732889969638 | 0.7077246912279371 | T | T | T |
| 0.3065558335932506 | 0.4287963036287996 | 0.8882892853872874 | T | T | T |
| 0.2037576802057106 | 0.4556938721187310 | 0.0086440695019642 | T | T | T |
| 0.0981797735234934 | 0.4296428126440021 | 0.8933318601202158 | T | T | T |
| 0.1008293277345229 | 0.4430958091620751 | 0.6956259423336985 | T | T | T |
| 0.2287464740928125 | 0.4664142411647330 | 0.7378656026337919 | T | T | T |
| 0.3568536287439904 | 0.6699418069271538 | 0.7377825663396308 | T | T | T |
| 0.3040512793266515 | 0.6588284389749288 | 0.9142567198499287 | T | T | T |
| 0.1905633383943326 | 0.6441610727339960 | 0.0124426054490471 | T | T | T |
| 0.0879250025868522 | 0.6696713304160666 | 0.8933860586427130 | T | T | T |
| 0.1029787153770267 | 0.6556915291695716 | 0.6978442192622729 | T | T | T |
| 0.2283818906363893 | 0.6384412840842025 | 0.7530857014691722 | T | T | T |
| 0.3216785317223625 | 0.5494763473830643 | 0.8040314308344425 | T | T | T |
| 0.0806041715816271 | 0.5488784075528905 | 0.8123252376558935 | T | T | T |
| 0.4319465181867658 | 0.3756701527320913 | 0.5725321426794391 | T | T | T |
| 0.4200842754117437 | 0.5077290641366288 | 0.5625950333152875 | T | T | T |
| 0.3949662450565868 | 0.6387742086190098 | 0.5542468538332050 | T | T | T |
| 0.1944428493004076 | 0.3694109962743802 | 0.6112724225908981 | T | T | T |
| 0.1780723018160024 | 0.4972107899300139 | 0.5580091593102297 | T | T | T |

**Structure files (CONTCAR) involved in this work:**

|                     |                    |                     |   |   |   |
|---------------------|--------------------|---------------------|---|---|---|
| 0.1947609386550677  | 0.6306449161505469 | 0.5595002209459841  | T | T | T |
| 0.9863731208170607  | 0.4539488035822456 | 0.7896693813870406  | T | T | T |
| 0.9836259715509150  | 0.6368743253620756 | 0.7794330835656792  | T | T | T |
| 0.1425866932413522  | 0.5614076457638446 | 0.2141384179636462  | T | T | T |
| 0.1999396938994283  | 0.5638685180429716 | 0.3906124868697536  | T | T | T |
| 0.2975947810717489  | 0.5487472756825091 | 0.5262394170751662  | T | T | T |
| 0.3931655284725232  | 0.5682927450262932 | 0.3901483921740863  | T | T | T |
| 0.3982990880164850  | 0.5536540961264467 | 0.1946242183355302  | T | T | T |
| 0.2710738292298613  | 0.5276840692587947 | 0.2321577633057810  | T | T | T |
| 0.1405372277403083  | 0.3247032306908225 | 0.2436859549710000  | T | T | T |
| 0.1929870973051294  | 0.3408895833322673 | 0.4186120453253087  | T | T | T |
| 0.3087996471023035  | 0.3528171132972504 | 0.5118441637458685  | T | T | T |
| 0.4100956739655981  | 0.3257522181849307 | 0.3893903191283350  | T | T | T |
| 0.3928750442470881  | 0.3427277870276964 | 0.1933596328935398  | T | T | T |
| 0.2697042186005452  | 0.3542947532568053 | 0.2567800543847041  | T | T | T |
| 0.1772354416990110  | 0.4465506022386023 | 0.3009149991190218  | T | T | T |
| 0.4120789509929035  | 0.4474562274540366 | 0.3147466053087202  | T | T | T |
| 0.0679430788062024  | 0.6212907042316778 | 0.0770762525284099  | T | T | T |
| 0.0832420688524842  | 0.4896158104849028 | 0.0704804504755538  | T | T | T |
| 0.1167298987301110  | 0.3600994146564263 | 0.0552329795645060  | T | T | T |
| 0.3057541549217072  | 0.6257414946727208 | 0.1063507219347241  | T | T | T |
| 0.3243767771313709  | 0.4970667813470103 | 0.0553760628022927  | T | T | T |
| 0.2960204995827823  | 0.3653273747001814 | 0.0606757489556750  | T | T | T |
| 0.5083055426620473  | 0.5379963227292299 | 0.2987672247093648  | T | T | T |
| 0.5114132176085840  | 0.3621298418922352 | 0.2716750549833871  | T | T | T |
| 0.4393880233759229  | 0.7494889874502522 | 0.6378750836254706  | T | T | T |
| 0.1949745737741989  | 0.7477388814732827 | 0.6484034082306365  | T | T | T |
| 0.2716388602416716  | 0.7471404899638535 | 0.0548193152706299  | T | T | T |
| 0.1080831801378747  | 0.7463269780913990 | 0.0503983549385778  | T | T | T |
| 0.0666125456372133  | 0.2473776924729769 | 0.1275825305018166  | T | T | T |
| 0.3041035246240059  | 0.2476268650098285 | 0.1473042342755819  | T | T | T |
| 0.2286602833143936  | 0.2494240394093520 | 0.5535972966534288  | T | T | T |
| 0.3920266677303125  | 0.2504049290591426 | 0.5482119680253663  | T | T | T |
| 0.5572612241213647  | 0.2494569386390606 | 0.3532377308568426  | T | T | T |
| 0.8149502337835463  | 0.2534422297120581 | 0.3520757909895259  | T | T | T |
| 0.7275560800192246  | 0.2489463084189275 | 0.9421432631462419  | T | T | T |
| 0.8914580730792117  | 0.2500016338706108 | 0.9446955574796152  | T | T | T |
| 0.9457042701720336  | 0.7526933826323564 | 0.8599151977694183  | T | T | T |
| 0.6852468152824941  | 0.7524053764321978 | 0.85064444410107294 | T | T | T |
| 0.7769206283094132  | 0.7480741154504408 | 0.4421645579352417  | T | T | T |
| 0.6108517435633729  | 0.7495218107109392 | 0.4491385208243099  | T | T | T |
| 0.9285054559561416  | 0.4896861118621048 | 0.5198015126745249  | T | T | T |
| 0.8247670029040247  | 0.3366558636330572 | 0.3258773912474405  | T | T | T |
| 0.7995848075690150  | 0.6360347104910107 | 0.6958909335128394  | T | T | T |
| 0.9264565147856541  | 0.5279555969746027 | 0.1943754916901853  | T | T | T |
| 0.9226687763079822  | 0.4314957492851698 | 0.4023257227646760  | T | T | T |
| 0.8659079552423067  | 0.5574167206831927 | 0.5565835688689853  | T | T | T |
| -0.0005953815312800 | 0.6452520149245802 | 0.3684215131585298  | T | T | T |
| 0.9979015492184091  | 0.5672384461993014 | 0.4480947308530143  | T | T | T |
| 0.9536382186880282  | 0.4702971383564886 | 0.5752270317344598  | T | T | T |
| 0.0800602930369073  | 0.6044859313644371 | 0.4071252749040211  | T | T | T |
| 0.0405316001650717  | 0.4553474118636521 | 0.4558078833659222  | T | T | T |
| 0.0351469208024281  | 0.3903806457378628 | 0.3545162287333144  | T | T | T |

**Structure files (CONTCAR) involved in this work:**

0.0257931083261684 0.6064614827141271 0.4098787505707184 T T T  
0.0094761184345161 0.4261139719742015 0.4037122030471111 T T T

**Figure S17 ZnCo-FS**

Si O Al Co Zn H C

1.0000000000000000

20.0219999999999985 0.0000000000000000 0.0000000000000000

0.0000000000000000 19.8990000000000009 0.0000000000000000

0.0000000000000000 0.0000000000000000 13.3829999999999991

93 193 3 1 1 6 2

Selective dynamics

Direct

0.4234843367951977 0.0577180804639877 0.6473798938099853 T T T  
0.3055506107033278 0.0272137696820659 0.7929879953028787 T T T  
0.2827435869845187 0.0591292653500127 0.0144544544828643 T T T  
0.1230656116390584 0.0618593567412909 0.0108911012944159 T T T  
0.0691157528216415 0.0293920053669144 0.7995105976439694 T T T  
0.1810467902890592 0.0564210735984963 0.6589132261287699 T T T  
0.4207261690869693 0.8264541943573336 0.6687687864161737 T T T  
0.3047036978573914 0.8684161784887768 0.8094580153092492 T T T  
0.2671283695257192 0.8280435941064846 0.0278546998489485 T T T  
0.1127228587850051 0.8252849411715448 0.0135304210974472 T T T  
0.0659972463681970 0.8720321594813040 0.7997149224607701 T T T  
0.1830538501510681 0.8271294240856445 0.6723117363717173 T T T  
0.0780533402929667 0.9407994440422178 0.1483247733562068 T T T  
0.1965627181360171 0.9709682619823051 0.2930116963139217 T T T  
0.2191558625681308 0.9372372780649908 0.5147032871753544 T T T  
0.3792697123585114 0.9343132294197112 0.5127319434847970 T T T  
0.4338984635254804 0.9679507753199766 0.3010840710052882 T T T  
0.3215638542770087 0.9414909240711103 0.1598609172174169 T T T  
0.0826529520212848 0.1719687404620227 0.1648814176564878 T T T  
0.1966306164221421 0.1296084315312554 0.3087960682344019 T T T  
0.2336396550659718 0.1706257515545180 0.5258429866797373 T T T  
0.3882857265695069 0.1733214182849291 0.5102973757804999 T T T  
0.4366997701105750 0.1263267274694251 0.2976945128178499 T T T  
0.3177317125435983 0.1698062576990788 0.1721154777233553 T T T  
0.5772995156856755 0.5553693120316391 0.3550983363192938 T T T  
0.6913288968152773 0.5257002723365357 0.2018416222301120 T T T  
0.7146369476336524 0.5666573158349333 0.9860742728260055 T T T  
0.8727551383132424 0.5712684086482326 0.9885314342020995 T T T  
0.8113832073944991 0.5484065813853084 0.3445345517555334 T T T  
0.5737654110593527 0.3275145128552731 0.3304766040886502 T T T  
0.6953778538743800 0.3714712932507386 0.1932259445456957 T T T  
0.7305127510227888 0.3262088839836712 0.9801688253644552 T T T  
0.8850475316381536 0.3251148517462939 0.9938126301663555 T T T  
0.9416239057527355 0.3750962803828318 0.1872029692738477 T T T  
0.9205451946706260 0.4448412559587587 0.8613694582427762 T T T  
0.7993286537147403 0.4713619419786202 0.7209112920425392 T T T  
0.7735266455765264 0.4352552489836762 0.4957698246906252 T T T  
0.6164682873336297 0.4281714964941990 0.4894111273093792 T T T  
0.5683949134189262 0.4681083083976276 0.7025615603615104 T T T  
0.6747339641917285 0.4463324550437355 0.8579637081001020 T T T  
0.9202851314367658 0.6766150968114319 0.8305032058716574 T T T  
0.7700918197682679 0.6684151334680966 0.4621455010887559 T T T

**Structure files (CONTCAR) involved in this work:**

|                    |                    |                    |   |   |   |
|--------------------|--------------------|--------------------|---|---|---|
| 0.6148864930240487 | 0.6723373670343064 | 0.4865740118712583 | T | T | T |
| 0.5620132932612715 | 0.6263787939120133 | 0.6982041601397768 | T | T | T |
| 0.6736339639154925 | 0.6733906277620797 | 0.8265726351982968 | T | T | T |
| 0.5791427725021612 | 0.9439876295393135 | 0.3573569496700152 | T | T | T |
| 0.6991925673831730 | 0.9726407627083540 | 0.2134296356692706 | T | T | T |
| 0.7219089653910034 | 0.9372779204967913 | 0.9914456304023588 | T | T | T |
| 0.8821973331250793 | 0.9338959172527868 | 0.9945237557252615 | T | T | T |
| 0.9340791814333321 | 0.9695759828403751 | 0.2047872169847781 | T | T | T |
| 0.8235275775344808 | 0.9455535875924327 | 0.3524946316747984 | T | T | T |
| 0.5794115342988546 | 0.1726859540316594 | 0.3287195375297629 | T | T | T |
| 0.6988913745884573 | 0.1313682224474948 | 0.1925004398644986 | T | T | T |
| 0.7331237712846580 | 0.1701067893655129 | 0.9714670552317501 | T | T | T |
| 0.8878274558561486 | 0.1728024686226311 | 0.9836473115433856 | T | T | T |
| 0.9373631228383781 | 0.1276733219704029 | 0.1973387356166661 | T | T | T |
| 0.8215112747055165 | 0.1736799181659004 | 0.3292589846725306 | T | T | T |
| 0.9243773708163218 | 0.0541638216251704 | 0.8552367060183937 | T | T | T |
| 0.8038655344538289 | 0.0253976192453972 | 0.7073124134115135 | T | T | T |
| 0.7825104334188544 | 0.0658120868532292 | 0.4902755051468904 | T | T | T |
| 0.6220207880349631 | 0.0688438101764410 | 0.4896587234676714 | T | T | T |
| 0.5684733748298199 | 0.0313509690701146 | 0.6985748705949913 | T | T | T |
| 0.6804031339978664 | 0.0530362993181341 | 0.8460778148411946 | T | T | T |
| 0.9238355974857472 | 0.8289491794748947 | 0.8362843748227772 | T | T | T |
| 0.8037138902765971 | 0.8678449081080708 | 0.6942803530350699 | T | T | T |
| 0.7710883687607858 | 0.8258277240532804 | 0.4775230699923488 | T | T | T |
| 0.6158900175423142 | 0.8261484835896190 | 0.4911616102883659 | T | T | T |
| 0.5647829621586283 | 0.8743436415948391 | 0.6989838864930539 | T | T | T |
| 0.6801745708569690 | 0.8321768798555461 | 0.8318987202306349 | T | T | T |
| 0.4239657045252265 | 0.4436389756305846 | 0.6406019218244897 | T | T | T |
| 0.3050372399768257 | 0.4707064492934689 | 0.7878955424697759 | T | T | T |
| 0.2817001476765688 | 0.4376628074567194 | 0.0066701030595949 | T | T | T |
| 0.1241542453853347 | 0.4362815900194144 | 0.0110630775026307 | T | T | T |
| 0.0655399365190375 | 0.4695662662281485 | 0.8018046898090815 | T | T | T |
| 0.1781556248817253 | 0.4437482040578634 | 0.6563162465047844 | T | T | T |
| 0.4185757165608177 | 0.6725806407965218 | 0.6610931201116054 | T | T | T |
| 0.3031237967649356 | 0.6286492905741168 | 0.8042219249311207 | T | T | T |
| 0.2679861605771480 | 0.6702225013317374 | 0.0221797378674930 | T | T | T |
| 0.1137757442184925 | 0.6714839102465980 | 0.0089563896861195 | T | T | T |
| 0.0634598161115730 | 0.6281179889120192 | 0.7976456281674612 | T | T | T |
| 0.1813754580798049 | 0.6684352744703277 | 0.6683532819148890 | T | T | T |
| 0.0753980212498828 | 0.5569143100050137 | 0.1494193368860758 | T | T | T |
| 0.1980216145784077 | 0.5266082678665713 | 0.2859876084275841 | T | T | T |
| 0.2198053524376468 | 0.5601680604406046 | 0.5120735963862573 | T | T | T |
| 0.3781106263256530 | 0.5659731436529354 | 0.5092481815865768 | T | T | T |
| 0.4300277918317614 | 0.5280432097791500 | 0.2991054325375429 | T | T | T |
| 0.3233092953314287 | 0.5535588314340317 | 0.1490706186311588 | T | T | T |
| 0.0866678816418139 | 0.3248328384171446 | 0.1586829272562756 | T | T | T |
| 0.1962850137834053 | 0.3685633569400126 | 0.3071442954371731 | T | T | T |
| 0.2320907196064989 | 0.3290732776542191 | 0.5256299661610493 | T | T | T |
| 0.3863802575955698 | 0.3269199233911732 | 0.5056079696750967 | T | T | T |
| 0.4324209251359067 | 0.3706510575443486 | 0.2921635063815664 | T | T | T |
| 0.3147782085853169 | 0.3283059012520340 | 0.1672126189056513 | T | T | T |
| 0.3580627938539711 | 0.0633539079394008 | 0.7182545073442648 | T | T | T |
| 0.3109595289611958 | 0.0635570701073851 | 0.9010804154519727 | T | T | T |



**Structure files (CONTCAR) involved in this work:**

|                    |                    |                    |   |   |   |
|--------------------|--------------------|--------------------|---|---|---|
| 0.2026080479872567 | 0.0468010226508615 | 0.0143278767400379 | T | T | T |
| 0.0967682571078920 | 0.0689922403762675 | 0.8971554226271066 | T | T | T |
| 0.1048672733344693 | 0.0590987118306195 | 0.7000025678851716 | T | T | T |
| 0.2299343040337799 | 0.0354384025952979 | 0.7508370046039250 | T | T | T |
| 0.3607480559855645 | 0.8257103120779377 | 0.7499576294901862 | T | T | T |
| 0.3065386491277197 | 0.8451440618426576 | 0.9251145266609710 | T | T | T |
| 0.1897275593509941 | 0.8518951149271892 | 0.0167471859075478 | T | T | T |
| 0.0853166060416802 | 0.8308224000701209 | 0.9001085458280716 | T | T | T |
| 0.1056583358630253 | 0.8396028619593071 | 0.7049058984286535 | T | T | T |
| 0.2310534306253283 | 0.8535298446496978 | 0.7626488363944388 | T | T | T |
| 0.3230250328426882 | 0.9476747957095490 | 0.8006581303182770 | T | T | T |
| 0.0871922843678844 | 0.9502270209359379 | 0.8126190108126585 | T | T | T |
| 0.4322352990688185 | 0.1274800377303536 | 0.5856970296126307 | T | T | T |
| 0.4170160549720749 | 0.9958535165966899 | 0.5686833830529469 | T | T | T |
| 0.3967926339785312 | 0.8637163648472526 | 0.5670574006953090 | T | T | T |
| 0.2006052495806194 | 0.1305240203764018 | 0.6184941644452983 | T | T | T |
| 0.1852925169055815 | 0.0015257819137682 | 0.5694533681981926 | T | T | T |
| 0.1992505340784385 | 0.8673146201203638 | 0.5695654037946687 | T | T | T |
| 0.9894051088453469 | 0.0406283596706095 | 0.7857803846881600 | T | T | T |
| 0.9859664264239171 | 0.8668148072011655 | 0.7806453332673567 | T | T | T |
| 0.1442624471303550 | 0.9350869665213403 | 0.2176825179669931 | T | T | T |
| 0.1915596904765866 | 0.9340914529308110 | 0.4008610586445250 | T | T | T |
| 0.2994851307332488 | 0.9477102397710224 | 0.5164318597940658 | T | T | T |
| 0.4051984769080811 | 0.9289416544001580 | 0.3986489238155577 | T | T | T |
| 0.3975474455294006 | 0.9388031721150475 | 0.2017539866099663 | T | T | T |
| 0.2722385949166157 | 0.9637313982903749 | 0.2507633006015240 | T | T | T |
| 0.1419876343998052 | 0.1725642039180222 | 0.2471384722135557 | T | T | T |
| 0.1931303265740461 | 0.1538909584541341 | 0.4240315603091385 | T | T | T |
| 0.3110366660510806 | 0.1476138679661159 | 0.5119198423307258 | T | T | T |
| 0.4170943293715836 | 0.1679976416324876 | 0.3977065909146875 | T | T | T |
| 0.3954858537152716 | 0.1575983740672452 | 0.2033626508390981 | T | T | T |
| 0.2710805671422624 | 0.1436748944767564 | 0.2642996038158927 | T | T | T |
| 0.1781838878090056 | 0.0503234078853431 | 0.3014901714202916 | T | T | T |
| 0.4177563267448818 | 0.0477016306241350 | 0.3129310077385231 | T | T | T |
| 0.0676515696072288 | 0.8704635674890328 | 0.0886613962662096 | T | T | T |
| 0.0843187563315720 | 0.0009278603613682 | 0.0666288235480375 | T | T | T |
| 0.1067323665710866 | 0.1323343247498241 | 0.0656770030838422 | T | T | T |
| 0.3017621846078185 | 0.8672985998638069 | 0.1201281352970183 | T | T | T |
| 0.3180235915196256 | 0.9956963651458217 | 0.0693456357456338 | T | T | T |
| 0.3005649688078867 | 0.1291113568326296 | 0.0703553983406745 | T | T | T |
| 0.5133768539080942 | 0.9544424821340118 | 0.2882679811270642 | T | T | T |
| 0.5165154309575070 | 0.1334242467692840 | 0.2774866529415221 | T | T | T |
| 0.6386309297269271 | 0.5608250160577368 | 0.2770835360121461 | T | T | T |
| 0.6988889561518555 | 0.5735634767056067 | 0.1048689521151025 | T | T | T |
| 0.7937480946989759 | 0.5564363559280849 | 0.9639518223681204 | T | T | T |
| 0.8858797287056859 | 0.5779762943799390 | 0.1063297492340232 | T | T | T |
| 0.8881917338940001 | 0.5267297777824955 | 0.3200282261630361 | T | T | T |
| 0.7633075034119177 | 0.5217693080827652 | 0.2584576396302838 | T | T | T |
| 0.6416052893545920 | 0.3352306013311658 | 0.2668301614097741 | T | T | T |
| 0.6914632292514939 | 0.3332362600338946 | 0.0856271397011487 | T | T | T |
| 0.8078729943584618 | 0.3507698059714027 | 0.9916790012510253 | T | T | T |
| 0.9108622220988967 | 0.3200421570935624 | 0.1095718920670882 | T | T | T |
| 0.9099926039681855 | 0.3627560193885384 | 0.3014865786598769 | T | T | T |

**Structure files (CONTCAR) involved in this work:**

|                    |                    |                    |   |   |   |
|--------------------|--------------------|--------------------|---|---|---|
| 0.7691399564220250 | 0.3682816290653563 | 0.2395266399164072 | T | T | T |
| 0.6702793126801152 | 0.4492358816875289 | 0.1754686695502879 | T | T | T |
| 0.9236407757438717 | 0.4487083509644151 | 0.1511771033735112 | T | T | T |
| 0.5693404966505213 | 0.6267215638686060 | 0.4127038832938606 | T | T | T |
| 0.5908497429049201 | 0.4974803489302367 | 0.4385450747850279 | T | T | T |
| 0.5802847541286839 | 0.3638853680251964 | 0.4394150199740605 | T | T | T |
| 0.8026379343203942 | 0.6285202269239781 | 0.3666866674616277 | T | T | T |
| 0.7917955043759494 | 0.5137980522180590 | 0.4561044839647779 | T | T | T |
| 0.8243507993722867 | 0.3870253311641505 | 0.4360925442307362 | T | T | T |
| 0.0103587944155968 | 0.5511694365589085 | 0.2182957235225195 | T | T | T |
| 0.0215696718238398 | 0.3638702135111134 | 0.2007288014686888 | T | T | T |
| 0.8563941465519054 | 0.4344044559346320 | 0.7866187180703478 | T | T | T |
| 0.7889133028385323 | 0.4324519979142941 | 0.6143828158666792 | T | T | T |
| 0.6967209968001570 | 0.4204631853401964 | 0.4696307520755058 | T | T | T |
| 0.6018566999239836 | 0.4286702872347400 | 0.6081564316649720 | T | T | T |
| 0.6019113352483227 | 0.4416204639212318 | 0.8055464217682994 | T | T | T |
| 0.7281027691214889 | 0.4739655699851258 | 0.7755153813052656 | T | T | T |
| 0.8614714863770101 | 0.6802281866838977 | 0.7499616213353029 | T | T | T |
| 0.8142215931829145 | 0.6435637770372681 | 0.5604769120073135 | T | T | T |
| 0.6927465928713270 | 0.6466683377501000 | 0.4804863267924008 | T | T | T |
| 0.5875793727755815 | 0.6665445356847661 | 0.5996572482393960 | T | T | T |
| 0.5953274740752114 | 0.6600328913518825 | 0.7968732855305642 | T | T | T |
| 0.7195996365416895 | 0.6484295022075587 | 0.7346597729421063 | T | T | T |
| 0.8239183694716802 | 0.5481710175892789 | 0.6938924822254149 | T | T | T |
| 0.5825825584817058 | 0.5477424308080080 | 0.6874618579769755 | T | T | T |
| 0.9300867117285458 | 0.3767586500962845 | 0.9274999939731197 | T | T | T |
| 0.9134409588107820 | 0.5094392455204365 | 0.9336514182111633 | T | T | T |
| 0.8965216274622054 | 0.6400048707665958 | 0.9329980164519167 | T | T | T |
| 0.6949508256843040 | 0.3718810069200336 | 0.8951498058530827 | T | T | T |
| 0.6735439129094615 | 0.5002979181196865 | 0.9486075638045144 | T | T | T |
| 0.6889028173788282 | 0.6339530455977179 | 0.9306003275591720 | T | T | T |
| 0.4891761459246765 | 0.4519007459341181 | 0.7112189613679901 | T | T | T |
| 0.4813006104520022 | 0.6316941253649073 | 0.7083303751807865 | T | T | T |
| 0.6443198167554214 | 0.9381024754721016 | 0.2861673036276390 | T | T | T |
| 0.6987134059539162 | 0.9333541241477307 | 0.1073002186031795 | T | T | T |
| 0.8024065565644662 | 0.9454904932033706 | 0.9821153010109075 | T | T | T |
| 0.9026918419010580 | 0.9279617814644439 | 0.1113303881953953 | T | T | T |
| 0.8990022209836934 | 0.9464109737609347 | 0.3084953558811916 | T | T | T |
| 0.7728882609823740 | 0.9654020233845441 | 0.2624835432279242 | T | T | T |
| 0.6416346558127196 | 0.1728397136523842 | 0.2516953341828589 | T | T | T |
| 0.6962670889563521 | 0.1552365875338168 | 0.0769155737439582 | T | T | T |
| 0.8108248226945088 | 0.1465568628111301 | 0.9801735075618546 | T | T | T |
| 0.9155250086344415 | 0.1677321925851879 | 0.0969481520048280 | T | T | T |
| 0.8979372913204757 | 0.1564277336009064 | 0.2940018864619006 | T | T | T |
| 0.7717996999157511 | 0.1464631466573148 | 0.2404409221019516 | T | T | T |
| 0.6815749036366838 | 0.0516217051080181 | 0.1990106871414116 | T | T | T |
| 0.9207926378364690 | 0.0485806021467399 | 0.1827774090944010 | T | T | T |
| 0.5711099803395212 | 0.8746137580720699 | 0.4205991956881371 | T | T | T |
| 0.5846263020493828 | 0.0061188497646381 | 0.4356888140509786 | T | T | T |
| 0.6009258996043098 | 0.1381230500986870 | 0.4340169015501291 | T | T | T |
| 0.8086124496955098 | 0.8703408050216587 | 0.3937335817062663 | T | T | T |
| 0.8173643627477329 | 0.9990949877853685 | 0.4432911663019707 | T | T | T |
| 0.8056965646538244 | 0.1332362636365438 | 0.4327102438593313 | T | T | T |

**Structure files (CONTCAR) involved in this work:**

|                    |                    |                    |   |   |   |
|--------------------|--------------------|--------------------|---|---|---|
| 0.0133455800357041 | 0.9544545168317425 | 0.2181250719071771 | T | T | T |
| 0.0171538834473664 | 0.1377722769588103 | 0.2151748974523561 | T | T | T |
| 0.8584401188023418 | 0.0542885741744860 | 0.7853697963584496 | T | T | T |
| 0.8054639191008782 | 0.0710284436486163 | 0.6066531790382438 | T | T | T |
| 0.7019278081908101 | 0.0569610346578686 | 0.4821752736796736 | T | T | T |
| 0.5984467906084880 | 0.0746078896248177 | 0.6054474164071203 | T | T | T |
| 0.6047911136796775 | 0.0518421428447918 | 0.8025179446963225 | T | T | T |
| 0.7299727648299390 | 0.0292147696772046 | 0.7567314619743917 | T | T | T |
| 0.8594091207290246 | 0.8328975235712183 | 0.7638066471135314 | T | T | T |
| 0.8070725325653514 | 0.8316272481284191 | 0.5856271437139154 | T | T | T |
| 0.6937320815032303 | 0.8501717092811312 | 0.4868173709502169 | T | T | T |
| 0.5893116008922216 | 0.8281739907612282 | 0.6055821845874120 | T | T | T |
| 0.6041778528462545 | 0.8521602362262785 | 0.7998316184121598 | T | T | T |
| 0.7299513555392527 | 0.8571678708786596 | 0.7426473532376819 | T | T | T |
| 0.8197262408367104 | 0.9473418794132268 | 0.6805591083191960 | T | T | T |
| 0.5803715701871339 | 0.9523622093326568 | 0.6726470658769396 | T | T | T |
| 0.9325415533151753 | 0.1271911133675157 | 0.9084822942270373 | T | T | T |
| 0.9203119337927211 | 0.9969670017928217 | 0.9420331772046934 | T | T | T |
| 0.9055816228078365 | 0.8644596758229915 | 0.9420459232452860 | T | T | T |
| 0.6973081435336346 | 0.1289189473800947 | 0.8818684167730774 | T | T | T |
| 0.6863611452978140 | 0.0023026206654054 | 0.9407060962169749 | T | T | T |
| 0.6989927882280303 | 0.8684346052706329 | 0.9366883466413600 | T | T | T |
| 0.4895299700428148 | 0.0465656588295346 | 0.7153317813946244 | T | T | T |
| 0.4852109370029667 | 0.8638880631921430 | 0.7173357433415586 | T | T | T |
| 0.3575269283202397 | 0.4377658664820950 | 0.7096492617873595 | T | T | T |
| 0.3088279289075407 | 0.4295769996695312 | 0.8927005167934421 | T | T | T |
| 0.2027367548224416 | 0.4569975897218055 | 0.0071975694739742 | T | T | T |
| 0.0944426277676468 | 0.4303772683990435 | 0.8985106297501567 | T | T | T |
| 0.1019878053659019 | 0.4430321292225214 | 0.6998786205329504 | T | T | T |
| 0.2292122364170721 | 0.4655744122711793 | 0.7446622510421158 | T | T | T |
| 0.3567615467775860 | 0.6703320823076703 | 0.7388493449172412 | T | T | T |
| 0.3059140232342603 | 0.6579233757271565 | 0.9167190883012127 | T | T | T |
| 0.1909623267515546 | 0.6454349141249103 | 0.0118459922236933 | T | T | T |
| 0.0875442444938195 | 0.6706786929921957 | 0.8942823808060708 | T | T | T |
| 0.1036910710460129 | 0.6550074864793116 | 0.6991843469948354 | T | T | T |
| 0.2286600470937022 | 0.6385729723808249 | 0.7572205831949870 | T | T | T |
| 0.3230805025449891 | 0.5494813816058701 | 0.8046552233310331 | T | T | T |
| 0.0803793322838047 | 0.5491048672567148 | 0.8151310380662773 | T | T | T |
| 0.4322903790486967 | 0.3758116661319224 | 0.5741184935032450 | T | T | T |
| 0.4210267509070287 | 0.5078654049169090 | 0.5653471999885572 | T | T | T |
| 0.3957632673039252 | 0.6390808043905666 | 0.5555847331989108 | T | T | T |
| 0.1962026105928013 | 0.3689432672728778 | 0.6167341136113949 | T | T | T |
| 0.1812716505193164 | 0.4969805835644242 | 0.5639104679858959 | T | T | T |
| 0.1970231301368022 | 0.6304919561199919 | 0.5631444825583685 | T | T | T |
| 0.9857724336035921 | 0.4545630083335792 | 0.7883821523364649 | T | T | T |
| 0.9838675726730889 | 0.6367483335967820 | 0.7796443761644589 | T | T | T |
| 0.1429737044918839 | 0.5644144384410075 | 0.2178924860492891 | T | T | T |
| 0.1997133812319319 | 0.5630952098324821 | 0.3948271631992665 | T | T | T |
| 0.2995226954982203 | 0.5486246629303504 | 0.5254423174260384 | T | T | T |
| 0.3970977502047320 | 0.5687994610722897 | 0.3919632581141559 | T | T | T |
| 0.3981659034012612 | 0.5556526119340138 | 0.1955437524689668 | T | T | T |
| 0.2717331107970309 | 0.5304307721959415 | 0.2365899247958028 | T | T | T |
| 0.1418460983565919 | 0.3243132909773553 | 0.2472522918065924 | T | T | T |

**Structure files (CONTCAR) involved in this work:**

|                    |                    |                    |   |   |   |
|--------------------|--------------------|--------------------|---|---|---|
| 0.1921819110277213 | 0.3458356811679044 | 0.4230772802856830 | T | T | T |
| 0.3093003992911150 | 0.3532085067097561 | 0.5129697104004667 | T | T | T |
| 0.4108104793207142 | 0.3273371911637337 | 0.3900449021562064 | T | T | T |
| 0.3925362097720557 | 0.3437189090924965 | 0.1941096901777261 | T | T | T |
| 0.2703474945506127 | 0.3543948563989360 | 0.2620740112683199 | T | T | T |
| 0.1771453259839055 | 0.4478240706937576 | 0.2983813104245052 | T | T | T |
| 0.4139496805667942 | 0.4486965376152113 | 0.3140254230967395 | T | T | T |
| 0.0687312413801117 | 0.6232373542074957 | 0.0784676926924783 | T | T | T |
| 0.0836331609551329 | 0.4915128723362726 | 0.0757056185960568 | T | T | T |
| 0.1165244482401730 | 0.3620575007051901 | 0.0605188345127713 | T | T | T |
| 0.3047767463335319 | 0.6280424479429763 | 0.1096827931904192 | T | T | T |
| 0.3223453596673178 | 0.4991384482928843 | 0.0585445750196566 | T | T | T |
| 0.2936796479140715 | 0.3672455257290341 | 0.0653628468271466 | T | T | T |
| 0.5098964901073120 | 0.5397043160651560 | 0.2931585783548587 | T | T | T |
| 0.5117319329202807 | 0.3617652070853687 | 0.2699736716726401 | T | T | T |
| 0.4396583197005282 | 0.7497240252257411 | 0.6397319414845598 | T | T | T |
| 0.1954546483666618 | 0.7477870255657026 | 0.6517355428112017 | T | T | T |
| 0.2717996426183619 | 0.7486755824760120 | 0.0525825497641845 | T | T | T |
| 0.1087769404553549 | 0.7478956596769490 | 0.0505611580839060 | T | T | T |
| 0.0669007980419697 | 0.2484578119408652 | 0.1302003564819023 | T | T | T |
| 0.3037160551428558 | 0.2486256925344801 | 0.1496129188132310 | T | T | T |
| 0.2283981535904029 | 0.2499277758375987 | 0.5513705526577451 | T | T | T |
| 0.3925486201204767 | 0.2507839005008055 | 0.5477413737128747 | T | T | T |
| 0.5575637683165510 | 0.2493254849360650 | 0.3523895895740864 | T | T | T |
| 0.8140698902717409 | 0.2524529383973214 | 0.3487309475310469 | T | T | T |
| 0.7277090161989703 | 0.2489575265367753 | 0.9425041621792735 | T | T | T |
| 0.8919277658616549 | 0.2503911641489951 | 0.9459819856614885 | T | T | T |
| 0.9447979397175392 | 0.7521280828455205 | 0.8598177581041055 | T | T | T |
| 0.6858022836925822 | 0.7523868578996556 | 0.8496481035422565 | T | T | T |
| 0.7762988958903853 | 0.7477738897373516 | 0.4419502464212466 | T | T | T |
| 0.6100172011174144 | 0.7496975846353912 | 0.4497123761139274 | T | T | T |
| 0.9190021609550858 | 0.4798722615986416 | 0.5293567933173833 | T | T | T |
| 0.8240762907851961 | 0.3361700051224774 | 0.3262257703869154 | T | T | T |
| 0.7993140710914837 | 0.6356627802672157 | 0.6948537608448077 | T | T | T |
| 0.9274926990559790 | 0.5303635166101190 | 0.1950930839651459 | T | T | T |
| 0.9220933359279085 | 0.4339663778303888 | 0.4040231529396912 | T | T | T |
| 0.8627256983517204 | 0.5557212762266682 | 0.5559010949299443 | T | T | T |
| 0.0036074417286640 | 0.5578903604113826 | 0.4174860218042642 | T | T | T |
| 0.0441598390462349 | 0.5217711848868132 | 0.5249557156291450 | T | T | T |
| 0.9530398367939599 | 0.4690688467950150 | 0.5790892255978485 | T | T | T |
| 0.0866803761168829 | 0.5327796585379013 | 0.4105757426840628 | T | T | T |
| 0.0368987914448098 | 0.4076607845496716 | 0.4512637323336010 | T | T | T |
| 0.0277374673839001 | 0.4427503947056087 | 0.3266215098159665 | T | T | T |
| 0.0383323498862057 | 0.5189105935399575 | 0.4435685567658278 | T | T | T |
| 0.0187560472747108 | 0.4507095257738303 | 0.4068703698673647 | T | T | T |

**Figure S17 ZnNi-IS**

Si O Al Ni Zn H C

1.0000000000000000

20.0219999999999985 0.0000000000000000 0.0000000000000000

0.0000000000000000 19.8990000000000009 0.0000000000000000

0.0000000000000000 0.0000000000000000 13.3829999999999991

93 193 3 1 1 6 2

Selective dynamics

**Structure files (CONTCAR) involved in this work:**

Direct

|                    |                    |                    |   |   |   |
|--------------------|--------------------|--------------------|---|---|---|
| 0.4237995049730356 | 0.0574058700512794 | 0.6476436859388007 | T | T | T |
| 0.3054978049672983 | 0.0271228516213537 | 0.7931968967242840 | T | T | T |
| 0.2827663130500401 | 0.0595803197580200 | 0.0143328623393532 | T | T | T |
| 0.1232213411035971 | 0.0615820545573296 | 0.0109637051042752 | T | T | T |
| 0.0697687598680621 | 0.0294291966416547 | 0.7997447114624540 | T | T | T |
| 0.1811272856958448 | 0.0558498801873463 | 0.6581656394222862 | T | T | T |
| 0.4206584454313145 | 0.8260767254215441 | 0.6682736460776927 | T | T | T |
| 0.3046721550911701 | 0.8685410686209923 | 0.8096132272630211 | T | T | T |
| 0.2666951412211674 | 0.8278507677628169 | 0.0277597241438855 | T | T | T |
| 0.1120714411793731 | 0.8260404332763014 | 0.0137920962653906 | T | T | T |
| 0.0661253716832881 | 0.8724848267421974 | 0.7996846733774878 | T | T | T |
| 0.1832531968133214 | 0.8277206536936098 | 0.6725009820666589 | T | T | T |
| 0.0772017066162972 | 0.9413772961157042 | 0.1485491625814250 | T | T | T |
| 0.1966160699582983 | 0.9711111054843531 | 0.2927481841242986 | T | T | T |
| 0.2195339150426598 | 0.9371166595162764 | 0.5143047120653681 | T | T | T |
| 0.3796410699422511 | 0.9341263380493411 | 0.5128906510363497 | T | T | T |
| 0.4336686051277715 | 0.9683634877756052 | 0.3008155425941345 | T | T | T |
| 0.3218172743154009 | 0.9419309879306099 | 0.1584772675715427 | T | T | T |
| 0.0817867818704486 | 0.1709743343550558 | 0.1658432290053102 | T | T | T |
| 0.1963548310731519 | 0.1297206638654635 | 0.3097710923535205 | T | T | T |
| 0.2339003329421550 | 0.1705674788064045 | 0.5264976967125866 | T | T | T |
| 0.3883523044741591 | 0.1730583185953770 | 0.5103412736606463 | T | T | T |
| 0.4366976229713521 | 0.1267226005028990 | 0.2974615390624230 | T | T | T |
| 0.3173590960076604 | 0.1701923052860698 | 0.1724618643555713 | T | T | T |
| 0.5769844073543350 | 0.5562942497230299 | 0.3549778742174576 | T | T | T |
| 0.6894455303008924 | 0.5262205392947608 | 0.2011519872235107 | T | T | T |
| 0.7156890248867714 | 0.5666170075355370 | 0.9856149739604166 | T | T | T |
| 0.8749411341149884 | 0.5717799265278818 | 0.9833429713221080 | T | T | T |
| 0.8099061970688143 | 0.5519535559181840 | 0.3405732269350163 | T | T | T |
| 0.5744275756029602 | 0.3275899924706880 | 0.3299204418194727 | T | T | T |
| 0.6939569463625760 | 0.3726247297077973 | 0.1912088875123320 | T | T | T |
| 0.7325714299766226 | 0.3273852251834277 | 0.9787597261107989 | T | T | T |
| 0.8875753033058654 | 0.3253847584571906 | 0.9920850159671257 | T | T | T |
| 0.9438336024459955 | 0.3727828362452810 | 0.1916017359875648 | T | T | T |
| 0.9206790733063039 | 0.4446070761430250 | 0.8572029398020783 | T | T | T |
| 0.8009680566614228 | 0.4732069089554740 | 0.7169713484397000 | T | T | T |
| 0.7772578531956745 | 0.4367529248829576 | 0.4919733683258579 | T | T | T |
| 0.6192321480861852 | 0.4291411866757500 | 0.4878143864279390 | T | T | T |
| 0.5697045447934582 | 0.4681925374487300 | 0.7010559905408250 | T | T | T |
| 0.6773124764635753 | 0.4468323862537845 | 0.8542515156902595 | T | T | T |
| 0.9195551381300987 | 0.6782207433124329 | 0.8248563029127578 | T | T | T |
| 0.7669239295723922 | 0.6690960722824790 | 0.4624612652622311 | T | T | T |
| 0.6125125752426318 | 0.6732567831909521 | 0.4883284598624359 | T | T | T |
| 0.5611409039830720 | 0.6264323562539171 | 0.6992404600920428 | T | T | T |
| 0.6747291242511158 | 0.6732284795789861 | 0.8252145179434180 | T | T | T |
| 0.5787993094352648 | 0.9443147941535218 | 0.3574893247593617 | T | T | T |
| 0.6985928503073426 | 0.9727254856611306 | 0.2133323041430953 | T | T | T |
| 0.7217666771922324 | 0.9370570529748595 | 0.9916398430410742 | T | T | T |
| 0.8820671950209829 | 0.9338273214734044 | 0.9945651416209698 | T | T | T |
| 0.9329036754508090 | 0.9704227260515008 | 0.2052515944477942 | T | T | T |
| 0.8227311167776642 | 0.9460064711894931 | 0.3531679366731019 | T | T | T |
| 0.5795046930340392 | 0.1729133605387532 | 0.3290166126133405 | T | T | T |

**Structure files (CONTCAR) involved in this work:**

|                    |                    |                    |   |   |   |
|--------------------|--------------------|--------------------|---|---|---|
| 0.6984546449692741 | 0.1307380938269157 | 0.1920925262399914 | T | T | T |
| 0.7334532001288666 | 0.1709472615212566 | 0.9716769811053124 | T | T | T |
| 0.8880764629141112 | 0.1731154988668528 | 0.9831657920523256 | T | T | T |
| 0.9360811369884797 | 0.1285666223432835 | 0.1980089120261020 | T | T | T |
| 0.8196509744692154 | 0.1737303307644060 | 0.3288784348722134 | T | T | T |
| 0.9247108197003543 | 0.0541650451117745 | 0.8554546882615695 | T | T | T |
| 0.8038880318302983 | 0.0262628555521716 | 0.7075010010263799 | T | T | T |
| 0.7824093469791941 | 0.0661934356130411 | 0.4906635616576487 | T | T | T |
| 0.6219703254526067 | 0.0690236473835213 | 0.4899018751009355 | T | T | T |
| 0.5686769785668947 | 0.0315010169255477 | 0.6992021864319742 | T | T | T |
| 0.6805363822468048 | 0.0535482915134506 | 0.8471444226687159 | T | T | T |
| 0.9238942802709662 | 0.8300721367907499 | 0.8356913756714067 | T | T | T |
| 0.8031213746385643 | 0.8688948936424126 | 0.6942340710413185 | T | T | T |
| 0.7696499612354565 | 0.8265900254167706 | 0.4779831258677256 | T | T | T |
| 0.6148647327407126 | 0.8267525562411910 | 0.4913333947841154 | T | T | T |
| 0.5643311020735448 | 0.8743823930122190 | 0.6995928047234419 | T | T | T |
| 0.6798777823571244 | 0.8322706502894252 | 0.8319658335401174 | T | T | T |
| 0.4237888911967985 | 0.4426972014433366 | 0.6435944657703845 | T | T | T |
| 0.3044379073275982 | 0.4710174963961448 | 0.7893913281305889 | T | T | T |
| 0.2783750992884935 | 0.4385561992901347 | 0.0103903851474259 | T | T | T |
| 0.1207426938436911 | 0.4356752028612325 | 0.0133156738398634 | T | T | T |
| 0.0650361448247153 | 0.4699474330732046 | 0.8005390810687949 | T | T | T |
| 0.1778026673983496 | 0.4437002959574730 | 0.6554209668619499 | T | T | T |
| 0.4178199422927693 | 0.6720823961110087 | 0.6635702871495376 | T | T | T |
| 0.3028806093142348 | 0.6286686634401074 | 0.8060287826245315 | T | T | T |
| 0.2666837121630496 | 0.6700368281423972 | 0.0242229989436758 | T | T | T |
| 0.1127299072959370 | 0.6724874147861171 | 0.0082469858368121 | T | T | T |
| 0.0625011306620406 | 0.6285851349345192 | 0.7957525841279492 | T | T | T |
| 0.1817754891908365 | 0.6692753152798058 | 0.6692600111390093 | T | T | T |
| 0.0790567338256475 | 0.5573033836293640 | 0.1467382908049881 | T | T | T |
| 0.1980321609686292 | 0.5248184717418712 | 0.2889515967409918 | T | T | T |
| 0.2169381455308394 | 0.5602846475821858 | 0.5123027236908521 | T | T | T |
| 0.3758798898457718 | 0.5651090193033598 | 0.5111132271012357 | T | T | T |
| 0.4294729822767136 | 0.5282291760184108 | 0.3008043835818509 | T | T | T |
| 0.3222172908009931 | 0.5539595724496197 | 0.1524141078807775 | T | T | T |
| 0.0862680774221789 | 0.3233295387813518 | 0.1614786269023098 | T | T | T |
| 0.1972511307766907 | 0.3672754443969661 | 0.3074146224896622 | T | T | T |
| 0.2324019294172119 | 0.3285179572074001 | 0.5257681355644529 | T | T | T |
| 0.3864376560369994 | 0.3267437399646260 | 0.5063455819449350 | T | T | T |
| 0.4324744558587452 | 0.3708570092158213 | 0.2927851869842601 | T | T | T |
| 0.3150805743731298 | 0.3287084142407390 | 0.1685605861589726 | T | T | T |
| 0.3582023625133082 | 0.0626813914506642 | 0.7182287804365021 | T | T | T |
| 0.3098707454047848 | 0.0648226084169711 | 0.9004359531196634 | T | T | T |
| 0.2027337323839636 | 0.0463367553583534 | 0.0157921175700187 | T | T | T |
| 0.0979639759004092 | 0.0693987468577071 | 0.8967829273810320 | T | T | T |
| 0.1050548391810192 | 0.0586303798045188 | 0.6995625945501978 | T | T | T |
| 0.2301580611700194 | 0.0341118494351611 | 0.7495233112780505 | T | T | T |
| 0.3601328020868277 | 0.8261416721362170 | 0.7486799465255591 | T | T | T |
| 0.3059478208468577 | 0.8430915491166868 | 0.9243880174329707 | T | T | T |
| 0.1892528390444693 | 0.8518419824204805 | 0.0171720192374355 | T | T | T |
| 0.0848921892753861 | 0.8309691894312430 | 0.9003168075685580 | T | T | T |
| 0.1057262998367092 | 0.8394725793872513 | 0.7051876519503640 | T | T | T |
| 0.2308264567079672 | 0.8550675202849524 | 0.7625915891861674 | T | T | T |

**Structure files (CONTCAR) involved in this work:**

|                    |                    |                    |   |   |   |
|--------------------|--------------------|--------------------|---|---|---|
| 0.3234109568927006 | 0.9477850013812751 | 0.8040515341130775 | T | T | T |
| 0.0883227371160992 | 0.9503016394160495 | 0.8132169468818381 | T | T | T |
| 0.4322299869692934 | 0.1270853951649541 | 0.5856169456075452 | T | T | T |
| 0.4177395625412477 | 0.9952859338845365 | 0.5692536040590486 | T | T | T |
| 0.3975200542770918 | 0.8631204333604785 | 0.5658930211431368 | T | T | T |
| 0.2009076481696822 | 0.1300987811746249 | 0.6187457975465666 | T | T | T |
| 0.1849720050332425 | 0.0015002363067191 | 0.5678277510228754 | T | T | T |
| 0.1989760311266558 | 0.8673648279816657 | 0.5692017085001012 | T | T | T |
| 0.9900405740986015 | 0.0401297975446255 | 0.7867506830327574 | T | T | T |
| 0.9861133259886168 | 0.8682347283016884 | 0.7804581429813610 | T | T | T |
| 0.1432422502339541 | 0.9358927895592332 | 0.2183569336492723 | T | T | T |
| 0.1931163612350761 | 0.9331476457943939 | 0.3999256157977367 | T | T | T |
| 0.2998336032087693 | 0.9475526953720973 | 0.5181967730490898 | T | T | T |
| 0.4045247808937750 | 0.9295100332888450 | 0.3982549633962756 | T | T | T |
| 0.3974374750454652 | 0.9388956917084869 | 0.2015058782510291 | T | T | T |
| 0.2716916518445375 | 0.9643472719694783 | 0.2481550105273025 | T | T | T |
| 0.1409388521763321 | 0.1716650622500267 | 0.2483814350276126 | T | T | T |
| 0.1931254589632179 | 0.1549546966159266 | 0.4245620932241005 | T | T | T |
| 0.3111411398309820 | 0.1472217522315709 | 0.5118805963475103 | T | T | T |
| 0.4170785666682693 | 0.1681122165844214 | 0.3977492798978015 | T | T | T |
| 0.3951463135167470 | 0.1581197325488724 | 0.2035054814540417 | T | T | T |
| 0.2705292855185110 | 0.1438981023154189 | 0.2643004575282144 | T | T | T |
| 0.1784500755029935 | 0.0502541648329787 | 0.3040113749219900 | T | T | T |
| 0.4174620353812383 | 0.0481052071586731 | 0.3121694699985678 | T | T | T |
| 0.0671539160873898 | 0.8704412894275630 | 0.0898625193551775 | T | T | T |
| 0.0839916820064522 | 0.0002333762655038 | 0.0650307591535646 | T | T | T |
| 0.1064221750536517 | 0.1314516815677253 | 0.0668190403625661 | T | T | T |
| 0.3019776097702206 | 0.8676385807207510 | 0.1188006885284950 | T | T | T |
| 0.3191030972271452 | 0.9960703541154118 | 0.0677271852254308 | T | T | T |
| 0.3002768397586226 | 0.1295425045045223 | 0.0705616441939878 | T | T | T |
| 0.5131002782474248 | 0.9550459996806444 | 0.2882302129122109 | T | T | T |
| 0.5164369894087534 | 0.1339606043043195 | 0.2772952506003189 | T | T | T |
| 0.6371797528364072 | 0.5632103678839604 | 0.2753690040923325 | T | T | T |
| 0.6973424245153017 | 0.5735578789093710 | 0.1034278644581179 | T | T | T |
| 0.7953572139255779 | 0.5560003073148010 | 0.9685721158560768 | T | T | T |
| 0.8955718792436721 | 0.5794410624088652 | 0.0985666121264129 | T | T | T |
| 0.8862315683248659 | 0.5415302141266320 | 0.3091265324132273 | T | T | T |
| 0.7612919720150326 | 0.5209631020287621 | 0.2573631626291223 | T | T | T |
| 0.6403977449741536 | 0.3337767991872353 | 0.2620994415396529 | T | T | T |
| 0.6915455596476906 | 0.3361537450350774 | 0.0821078640573743 | T | T | T |
| 0.8101181919401874 | 0.3506034851790360 | 0.9940102861869062 | T | T | T |
| 0.9175615997581635 | 0.3214240500860958 | 0.1047118700855332 | T | T | T |
| 0.9064794862732830 | 0.3545819591060752 | 0.2965766771617046 | T | T | T |
| 0.7670937641109185 | 0.3702386391985565 | 0.2392328166443757 | T | T | T |
| 0.6667491849553474 | 0.4500307342936117 | 0.1756209461024245 | T | T | T |
| 0.9311684123391196 | 0.4481793821944589 | 0.1553157679579300 | T | T | T |
| 0.5680465117869465 | 0.6271502418169226 | 0.4135930926720214 | T | T | T |
| 0.5919906418309770 | 0.4978859468621073 | 0.4369179751688838 | T | T | T |
| 0.5837107536784132 | 0.3643095289477447 | 0.4379993068759495 | T | T | T |
| 0.7938938160350937 | 0.6309284984166161 | 0.3627300725511238 | T | T | T |
| 0.7962575498276224 | 0.5143839917889811 | 0.4516733513707473 | T | T | T |
| 0.8264746057524227 | 0.3851049968297732 | 0.4359907491756250 | T | T | T |
| 0.0126069546660645 | 0.5562616455333020 | 0.2262405343808619 | T | T | T |

**Structure files (CONTCAR) involved in this work:**

|                    |                    |                    |   |   |   |
|--------------------|--------------------|--------------------|---|---|---|
| 0.0236598007753837 | 0.3616448887913121 | 0.2113349573653442 | T | T | T |
| 0.8558219671667455 | 0.4347340171540938 | 0.7849287611042431 | T | T | T |
| 0.7932709688127669 | 0.4345272383430708 | 0.6104262877523117 | T | T | T |
| 0.6994668842529599 | 0.4230936815417878 | 0.4684790165807596 | T | T | T |
| 0.6032741240707287 | 0.4294028895057467 | 0.6063150864153850 | T | T | T |
| 0.6038230125996050 | 0.4416352124175671 | 0.8036159542170116 | T | T | T |
| 0.7289350659582119 | 0.4755690299471951 | 0.7701668881647138 | T | T | T |
| 0.8614730398226961 | 0.6833013245028950 | 0.7436519768558362 | T | T | T |
| 0.8137829708700994 | 0.6434019284438055 | 0.5566873398955789 | T | T | T |
| 0.6901641377234826 | 0.6477710336613497 | 0.4866485123998766 | T | T | T |
| 0.5834456772261852 | 0.6681837145544819 | 0.6005249673584224 | T | T | T |
| 0.5961063280003789 | 0.6593672790745077 | 0.7971564130221285 | T | T | T |
| 0.7204287816393269 | 0.6487808158741001 | 0.7328652144504514 | T | T | T |
| 0.8263688615078816 | 0.5497345385791657 | 0.6914966519671893 | T | T | T |
| 0.5823859281204284 | 0.5481638782773814 | 0.6862532727518899 | T | T | T |
| 0.9308778582519623 | 0.3768075028083703 | 0.9229992087887859 | T | T | T |
| 0.9145879630131214 | 0.5097600205185638 | 0.9287395546157924 | T | T | T |
| 0.8948205129866337 | 0.6408378790027902 | 0.9261021082590626 | T | T | T |
| 0.6994162288670782 | 0.3727601565050520 | 0.8910053719252072 | T | T | T |
| 0.6759358236428425 | 0.5002306429238832 | 0.9456901348750932 | T | T | T |
| 0.6913350503940147 | 0.6339747586963690 | 0.9289857029890483 | T | T | T |
| 0.4904938727504670 | 0.4516880414310479 | 0.7105292951693378 | T | T | T |
| 0.4802975662257477 | 0.6310962556451784 | 0.7114337504218932 | T | T | T |
| 0.6438958858335979 | 0.9379629598768038 | 0.2862435538299019 | T | T | T |
| 0.6992041681377399 | 0.9327465703612163 | 0.1077445045766038 | T | T | T |
| 0.8022907155558341 | 0.9446349392573689 | 0.9812267004077186 | T | T | T |
| 0.9020476474658314 | 0.9285195176929293 | 0.1116018771506973 | T | T | T |
| 0.8982061951035825 | 0.9462421244753397 | 0.3087200516078216 | T | T | T |
| 0.7720913017485762 | 0.9667247422541525 | 0.2635173565922949 | T | T | T |
| 0.6418664750343792 | 0.1724948220392640 | 0.2523150247723829 | T | T | T |
| 0.6966291282737244 | 0.1563320504611893 | 0.0772803256772648 | T | T | T |
| 0.8110514592409954 | 0.1468157611753424 | 0.9795022884631384 | T | T | T |
| 0.9153503327672344 | 0.1681301863743333 | 0.0967395096269897 | T | T | T |
| 0.8968044456614629 | 0.1588142536659523 | 0.2938036330181016 | T | T | T |
| 0.7716759375884744 | 0.1428344581850478 | 0.2404441680389660 | T | T | T |
| 0.6796143597131576 | 0.0511721571927025 | 0.1966090424971709 | T | T | T |
| 0.9188323294498018 | 0.0494159379666532 | 0.1844236985160273 | T | T | T |
| 0.5698939271809597 | 0.8751090753594991 | 0.4208228534243594 | T | T | T |
| 0.5845171883657977 | 0.0063364031539413 | 0.4358897788468515 | T | T | T |
| 0.6003656634903396 | 0.1381944167809804 | 0.4345212678174981 | T | T | T |
| 0.8074587540002516 | 0.8707294900257776 | 0.3938789084501546 | T | T | T |
| 0.8173159205039968 | 0.9991802188321874 | 0.4445239093940404 | T | T | T |
| 0.8060252419881115 | 0.1332276889108020 | 0.4329883016229460 | T | T | T |
| 0.0124190067261432 | 0.9555449668873366 | 0.2177341658724298 | T | T | T |
| 0.0161596524642645 | 0.1370115650643442 | 0.2158742685122277 | T | T | T |
| 0.8591857290137996 | 0.0545370589091431 | 0.7848856472200803 | T | T | T |
| 0.8049971262191197 | 0.0720144916879920 | 0.6070952132547948 | T | T | T |
| 0.7018368838328543 | 0.0572473095789049 | 0.4819416314666894 | T | T | T |
| 0.5986868357322662 | 0.0745076238582562 | 0.6059152874342985 | T | T | T |
| 0.6049955634886732 | 0.0518562000046379 | 0.8031611389471509 | T | T | T |
| 0.7303562308883756 | 0.0301488586020584 | 0.7579911943555927 | T | T | T |
| 0.8591838044395258 | 0.8348051850456143 | 0.7641461410111584 | T | T | T |
| 0.8061104615816458 | 0.8323873815615761 | 0.5858255860726920 | T | T | T |



**Structure files (CONTCAR) involved in this work:**

|                    |                    |                    |   |   |   |
|--------------------|--------------------|--------------------|---|---|---|
| 0.6924336039309348 | 0.8515609968076102 | 0.4872479315446159 | T | T | T |
| 0.5885218437288557 | 0.8284664469608474 | 0.6058650266466897 | T | T | T |
| 0.6037074834309016 | 0.8519873113148193 | 0.8002403887997119 | T | T | T |
| 0.7295578920474283 | 0.8583278026731985 | 0.7432564060355672 | T | T | T |
| 0.8191438887348147 | 0.9482735164161573 | 0.6797569738768837 | T | T | T |
| 0.5799047373135722 | 0.9524200933597079 | 0.6735264453700432 | T | T | T |
| 0.9330566093263967 | 0.1270170182337891 | 0.9088681312277613 | T | T | T |
| 0.9200580894172095 | 0.9969242935985073 | 0.9421445043041018 | T | T | T |
| 0.9065240003928396 | 0.8643937116107628 | 0.9427273001896594 | T | T | T |
| 0.6968681603772656 | 0.1295413822686405 | 0.8828581144416783 | T | T | T |
| 0.6865963645537589 | 0.0025566495692833 | 0.9415458220930888 | T | T | T |
| 0.6982191534705389 | 0.8683415601927748 | 0.9371147267550171 | T | T | T |
| 0.4897250987056554 | 0.0469373159481316 | 0.7159538697853989 | T | T | T |
| 0.4847186463625330 | 0.8635746118486241 | 0.7178202326590757 | T | T | T |
| 0.3590584310387105 | 0.4360283952723829 | 0.7165269312370747 | T | T | T |
| 0.3030806169660499 | 0.4311616439775043 | 0.8954227322256233 | T | T | T |
| 0.1989953821201358 | 0.4578706751559353 | 0.0157820972940862 | T | T | T |
| 0.0931205391142321 | 0.4330152763972724 | 0.9001662533234314 | T | T | T |
| 0.1028635900408112 | 0.4410402003999205 | 0.7019375042460916 | T | T | T |
| 0.2300682859230436 | 0.4673201140195306 | 0.7410916000787992 | T | T | T |
| 0.3565121270345588 | 0.6714867835313288 | 0.7425999198607273 | T | T | T |
| 0.3047373134768753 | 0.6567780425374178 | 0.9193732004447648 | T | T | T |
| 0.1893350753379704 | 0.6453919492477325 | 0.0128012538351019 | T | T | T |
| 0.0851982521600210 | 0.6696149381212910 | 0.8951132342657480 | T | T | T |
| 0.1039444406555705 | 0.6574805322328202 | 0.7000826655101297 | T | T | T |
| 0.2285908075395850 | 0.6385023944839944 | 0.7580726693093753 | T | T | T |
| 0.3234842687985655 | 0.5496653484157424 | 0.8054679041715902 | T | T | T |
| 0.0802118678666722 | 0.5496939597076055 | 0.8117242974996410 | T | T | T |
| 0.4317892758808923 | 0.3751874769479671 | 0.5762787412712307 | T | T | T |
| 0.4173780273763085 | 0.5067370515542353 | 0.5685137801206387 | T | T | T |
| 0.3930571237897488 | 0.6377905358298847 | 0.5594731037016910 | T | T | T |
| 0.1966214272749676 | 0.3692942306764351 | 0.6158082897985921 | T | T | T |
| 0.1777367757190144 | 0.4974208829688478 | 0.5633887834899326 | T | T | T |
| 0.1961708386576457 | 0.6310810038359932 | 0.5637837606455036 | T | T | T |
| 0.9860026278054942 | 0.4547078161046872 | 0.7850900922248637 | T | T | T |
| 0.9833911895304803 | 0.6375804080514622 | 0.7758021193562479 | T | T | T |
| 0.1449993632422790 | 0.5629435578927494 | 0.2155492120579565 | T | T | T |
| 0.1945567023480278 | 0.5634785976040115 | 0.3955122079581215 | T | T | T |
| 0.2967042770438440 | 0.5479390204492707 | 0.5226754676310431 | T | T | T |
| 0.3966161107810551 | 0.5683564422215213 | 0.3944636785047398 | T | T | T |
| 0.3972365537734576 | 0.5565377926727326 | 0.1974914603161699 | T | T | T |
| 0.2720581229158786 | 0.5303315406805446 | 0.2419505035233151 | T | T | T |
| 0.1460786593769641 | 0.3221319393591624 | 0.2431648649456865 | T | T | T |
| 0.1923425298621244 | 0.3437187035317292 | 0.4227466541195551 | T | T | T |
| 0.3093735891989190 | 0.3532058674810931 | 0.5130296019380616 | T | T | T |
| 0.4109765952708545 | 0.3276764779548553 | 0.3908756022650191 | T | T | T |
| 0.3931003008296526 | 0.3436846211333431 | 0.1940836380933413 | T | T | T |
| 0.2723620229479345 | 0.3557943585361715 | 0.2646794166638303 | T | T | T |
| 0.1764060722552369 | 0.4465092458787953 | 0.2992554725404723 | T | T | T |
| 0.4131561950116220 | 0.4488273688049451 | 0.3139995506957786 | T | T | T |
| 0.0681216426137543 | 0.6242288260556504 | 0.0808920215011159 | T | T | T |
| 0.0775811304508631 | 0.4905148742414285 | 0.0789572053258483 | T | T | T |
| 0.1116903372555078 | 0.3617362184573153 | 0.0609411032025506 | T | T | T |

**Structure files (CONTCAR) involved in this work:**

|                    |                    |                    |   |   |   |
|--------------------|--------------------|--------------------|---|---|---|
| 0.3019682676419208 | 0.6281427783200161 | 0.1134036830546489 | T | T | T |
| 0.3195544445650285 | 0.4999801812285126 | 0.0614559690311412 | T | T | T |
| 0.2920978716451152 | 0.3679931806199497 | 0.0676264313614598 | T | T | T |
| 0.5091102684533895 | 0.5400474487548591 | 0.2942385236387952 | T | T | T |
| 0.5117204005547169 | 0.3623863915235586 | 0.2715338896980872 | T | T | T |
| 0.4390613975052494 | 0.7489969355980681 | 0.6402256271859166 | T | T | T |
| 0.1968248592477653 | 0.7483985646960215 | 0.6527450164396753 | T | T | T |
| 0.2702179457154991 | 0.7485238775151711 | 0.0540992944822120 | T | T | T |
| 0.1073193296068523 | 0.7483382380647939 | 0.0506711371551985 | T | T | T |
| 0.0665123264671505 | 0.2474131694680732 | 0.1308993575878660 | T | T | T |
| 0.3032407579911933 | 0.2491836874870070 | 0.1506632961509849 | T | T | T |
| 0.2290886280476979 | 0.2496856833022783 | 0.5534118997133235 | T | T | T |
| 0.3924432240279289 | 0.2504818075637756 | 0.5479855841614371 | T | T | T |
| 0.5578674019888205 | 0.2495968525801399 | 0.3529866320800392 | T | T | T |
| 0.8068246843248772 | 0.2517809894086013 | 0.3464809882327388 | T | T | T |
| 0.7287730181646380 | 0.2497784306183680 | 0.9424392843451213 | T | T | T |
| 0.8927533888992116 | 0.2503637601038046 | 0.9444897551490009 | T | T | T |
| 0.9450923324846517 | 0.7529461924683615 | 0.8567877467480405 | T | T | T |
| 0.6860338203671633 | 0.7523896299970275 | 0.8484513892369471 | T | T | T |
| 0.7735582105262323 | 0.7486783527202647 | 0.4428010045535041 | T | T | T |
| 0.6084814779095475 | 0.7503890551778090 | 0.4498976737349992 | T | T | T |
| 0.9370816103042712 | 0.4982044301234688 | 0.5126675743647459 | T | T | T |
| 0.8217122432486105 | 0.3352508377716871 | 0.3244343939349027 | T | T | T |
| 0.7998501432081365 | 0.6362984456678092 | 0.6902747234693875 | T | T | T |
| 0.9237654712194043 | 0.5292300411909894 | 0.1936736139773663 | T | T | T |
| 0.9305190810246410 | 0.4052876382300043 | 0.4285067142871039 | T | T | T |
| 0.8690916318381979 | 0.5572057385309820 | 0.5520403424115081 | T | T | T |
| 0.9834144463479872 | 0.6444341715972293 | 0.3015975666105566 | T | T | T |
| 0.0001437422717362 | 0.5720524942525086 | 0.3794330270327981 | T | T | T |
| 0.9672076739778094 | 0.4872501467120459 | 0.5677368099925022 | T | T | T |
| 0.0682378444292046 | 0.6183204750662382 | 0.3237078329939234 | T | T | T |
| 0.0514337344641319 | 0.4209763422041718 | 0.4921349791067596 | T | T | T |
| 0.0405792055523623 | 0.3399887661176690 | 0.4318815737996169 | T | T | T |
| 0.0165520388892175 | 0.6014557101241476 | 0.3146767061189383 | T | T | T |
| 0.0151055640210442 | 0.3862511361777300 | 0.4571196488598731 | T | T | T |

**Figure S17 ZnNi-TS**

Si O Al Ni Zn H C

1.0000000000000000

20.0219999999999985 0.0000000000000000 0.0000000000000000

0.0000000000000000 19.8990000000000009 0.0000000000000000

0.0000000000000000 0.0000000000000000 13.3829999999999991

93 193 3 1 1 6 2

Selective dynamics

Direct

|                    |                    |                    |   |   |   |
|--------------------|--------------------|--------------------|---|---|---|
| 0.4241794530551395 | 0.0566024923692435 | 0.6466932854829094 | T | T | T |
| 0.3040219270492367 | 0.0254731685917119 | 0.7903598851000696 | T | T | T |
| 0.2828895734720919 | 0.0589827265431717 | 0.0122795183509913 | T | T | T |
| 0.1235683108143865 | 0.0609543084106572 | 0.0111010592409636 | T | T | T |
| 0.0710072361100044 | 0.0284880068430539 | 0.7997874336601172 | T | T | T |
| 0.1795390362755123 | 0.0545813891171039 | 0.6532870290898458 | T | T | T |
| 0.4208312646274993 | 0.8262476196711085 | 0.6664622288806185 | T | T | T |
| 0.3041354556352142 | 0.8670132863935360 | 0.8084865546808182 | T | T | T |
| 0.2670618981511947 | 0.8262882275003023 | 0.0270816900494106 | T | T | T |

**Structure files (CONTCAR) involved in this work:**

|                    |                    |                    |   |   |   |
|--------------------|--------------------|--------------------|---|---|---|
| 0.1125204228734838 | 0.8243008074506953 | 0.0135235807180946 | T | T | T |
| 0.0664798252113655 | 0.8716546830911284 | 0.7996277795844590 | T | T | T |
| 0.1824770276487185 | 0.8270923198505853 | 0.6699897192948402 | T | T | T |
| 0.0774422215615722 | 0.9405617802509290 | 0.1471163065245422 | T | T | T |
| 0.1977980118528707 | 0.9715323144458655 | 0.2898456470106863 | T | T | T |
| 0.2191438911805269 | 0.9369859002560913 | 0.5120973695475413 | T | T | T |
| 0.3786824202322782 | 0.9345850375233936 | 0.5122350268057771 | T | T | T |
| 0.4323316886064377 | 0.9682343216024999 | 0.3003589688043440 | T | T | T |
| 0.3227299818202033 | 0.9421885792617576 | 0.1538310574743752 | T | T | T |
| 0.0818383013860824 | 0.1712501891029165 | 0.1639968370033957 | T | T | T |
| 0.1970203116715916 | 0.1297208039719945 | 0.3076707159368431 | T | T | T |
| 0.2334455341671109 | 0.1707075420630926 | 0.5251485679762421 | T | T | T |
| 0.3880169299882051 | 0.1729153516207757 | 0.5109550509467161 | T | T | T |
| 0.4367163963138935 | 0.1265601257982079 | 0.2980988552295408 | T | T | T |
| 0.3185175239014147 | 0.1692416094393312 | 0.1705395707878983 | T | T | T |
| 0.5772017700246103 | 0.5558737260508201 | 0.3541024404095676 | T | T | T |
| 0.6905182271709773 | 0.5253419231017752 | 0.2009485339576738 | T | T | T |
| 0.7165527307421529 | 0.5668030798951208 | 0.9848069590333657 | T | T | T |
| 0.8747741161187893 | 0.5720057591989729 | 0.9874684395903751 | T | T | T |
| 0.8103070525757806 | 0.5517332161932139 | 0.3432749382073604 | T | T | T |
| 0.5743907576751979 | 0.3275305578694135 | 0.3304646766919699 | T | T | T |
| 0.6952172475224072 | 0.3712439093614211 | 0.1919222319898703 | T | T | T |
| 0.7309056647030228 | 0.3265319870028403 | 0.9788489246510019 | T | T | T |
| 0.8853987275787529 | 0.3255789408988657 | 0.9956960643791766 | T | T | T |
| 0.9418467658135068 | 0.3752548791945206 | 0.1907102297887243 | T | T | T |
| 0.9214573494581809 | 0.4447089844015713 | 0.8625114610905855 | T | T | T |
| 0.8014826043435539 | 0.4717477472039953 | 0.7202217170917256 | T | T | T |
| 0.7763609276011257 | 0.4369463910006198 | 0.4951484192017171 | T | T | T |
| 0.6187233917735812 | 0.4288779328620647 | 0.4886196957706640 | T | T | T |
| 0.5685714984633327 | 0.4687764152074528 | 0.7012255053187400 | T | T | T |
| 0.6760161488233795 | 0.4466089708546846 | 0.8552340686644423 | T | T | T |
| 0.9203081046885462 | 0.6777152596165190 | 0.8294642782134143 | T | T | T |
| 0.7690245332858526 | 0.6691288342645473 | 0.4648112778217778 | T | T | T |
| 0.6143926867628213 | 0.6730007196571722 | 0.4880590345004396 | T | T | T |
| 0.5612311981872800 | 0.6269416807013106 | 0.6985105790239704 | T | T | T |
| 0.6744129255190171 | 0.6730708077378282 | 0.8258295799347397 | T | T | T |
| 0.5781255075276525 | 0.9444804108683970 | 0.3590718901976404 | T | T | T |
| 0.6993421837051101 | 0.9729528982262754 | 0.2157931997535557 | T | T | T |
| 0.7213415972033173 | 0.9362827847548948 | 0.9937817215505010 | T | T | T |
| 0.8816642125361120 | 0.9337590659745624 | 0.9958868627076470 | T | T | T |
| 0.9333928165915015 | 0.9699362203277758 | 0.2058983197919037 | T | T | T |
| 0.8241664461335383 | 0.9460815623295927 | 0.3560187324607189 | T | T | T |
| 0.5795854321488011 | 0.1726890950096788 | 0.3303402937792810 | T | T | T |
| 0.6993789586986128 | 0.1316273628858224 | 0.1938163451475360 | T | T | T |
| 0.7332234717355266 | 0.1705966759433301 | 0.9723636110214782 | T | T | T |
| 0.8879142117477773 | 0.1730974673640978 | 0.9847122952284730 | T | T | T |
| 0.9367084659506609 | 0.1281320745550279 | 0.1990652249015678 | T | T | T |
| 0.8212251989885797 | 0.1738824031425121 | 0.3315897190764148 | T | T | T |
| 0.9251734149643629 | 0.0543244634186632 | 0.8573730588878049 | T | T | T |
| 0.8041807585792285 | 0.0260909080920025 | 0.7095374949519752 | T | T | T |
| 0.7824658614051822 | 0.0660668439369411 | 0.4922136194128499 | T | T | T |
| 0.6223289971231266 | 0.0687349308869219 | 0.4907267841003732 | T | T | T |
| 0.5694093780135284 | 0.0307382089674948 | 0.6993294558035973 | T | T | T |

**Structure files (CONTCAR) involved in this work:**

|                    |                    |                    |   |   |   |
|--------------------|--------------------|--------------------|---|---|---|
| 0.6802253959391441 | 0.0524149274370289 | 0.8494301391665338 | T | T | T |
| 0.9243834051697748 | 0.8299966621776954 | 0.8374220592187223 | T | T | T |
| 0.8032824935042951 | 0.8691608364511533 | 0.6971185371199214 | T | T | T |
| 0.7709409329489507 | 0.8266132232801431 | 0.4802769156181956 | T | T | T |
| 0.6161714874555818 | 0.8264560377394710 | 0.4914493539766910 | T | T | T |
| 0.5649880170664638 | 0.8738407471432583 | 0.6990736916609359 | T | T | T |
| 0.6794853066474585 | 0.8323278924900097 | 0.8336533159739139 | T | T | T |
| 0.4235562704538293 | 0.4435225460086875 | 0.6399653360130281 | T | T | T |
| 0.3032908695452394 | 0.4713091964174444 | 0.7851772776732624 | T | T | T |
| 0.2810826945234217 | 0.4366292007967717 | 0.0053918888038516 | T | T | T |
| 0.1235962473045986 | 0.4356834937658155 | 0.0102380661372150 | T | T | T |
| 0.0658116365811819 | 0.4695268639491756 | 0.7995565528776083 | T | T | T |
| 0.1764889367923924 | 0.4442588717684565 | 0.6513321697338783 | T | T | T |
| 0.4179567752753461 | 0.6722799279842773 | 0.6603196672917053 | T | T | T |
| 0.3019922832673958 | 0.6289611445454149 | 0.8026070816036621 | T | T | T |
| 0.2671388004222044 | 0.6692874179652833 | 0.0217136677750413 | T | T | T |
| 0.1128448498477442 | 0.6705037465944613 | 0.0081561110398901 | T | T | T |
| 0.0626567975379208 | 0.6283895572571475 | 0.7954849688211835 | T | T | T |
| 0.1803978527976352 | 0.6687821244698141 | 0.6656897452309799 | T | T | T |
| 0.0758678750108021 | 0.5555935905291560 | 0.1481945709313539 | T | T | T |
| 0.1982093598530345 | 0.5247950983821148 | 0.2843991687598182 | T | T | T |
| 0.2174574818193295 | 0.5603346162973505 | 0.5092294361231321 | T | T | T |
| 0.3757004733497875 | 0.5653606328902095 | 0.5088499960967926 | T | T | T |
| 0.4282842477187085 | 0.5272757094571096 | 0.2997780979462965 | T | T | T |
| 0.3234517371104843 | 0.5515256120431591 | 0.1470038891365948 | T | T | T |
| 0.0860433238958267 | 0.3241438525441599 | 0.1562287893790881 | T | T | T |
| 0.1967425840407205 | 0.3671903023575050 | 0.3047285450551961 | T | T | T |
| 0.2320030598920827 | 0.3280563787391674 | 0.5238199557299272 | T | T | T |
| 0.3861391396070918 | 0.3264011247385813 | 0.5054763406259601 | T | T | T |
| 0.4322466466397379 | 0.3699177661092529 | 0.2921935983507947 | T | T | T |
| 0.3155674153863366 | 0.3276603248641034 | 0.1647945537135428 | T | T | T |
| 0.3586908544027643 | 0.0600680826342194 | 0.7175918081521042 | T | T | T |
| 0.3049655079580058 | 0.0653104305666672 | 0.8961370846610877 | T | T | T |
| 0.2029626134943729 | 0.0462496119436911 | 0.0219830280759457 | T | T | T |
| 0.1019611546226512 | 0.0682305967951792 | 0.8951594135502752 | T | T | T |
| 0.1042416195548131 | 0.0574433658174957 | 0.6978546403920520 | T | T | T |
| 0.2300407107315549 | 0.0307867540745592 | 0.7415781368905898 | T | T | T |
| 0.3605883017297413 | 0.8261688369586762 | 0.7471528218506313 | T | T | T |
| 0.3054100770393498 | 0.8402221492986144 | 0.9224680223555290 | T | T | T |
| 0.1896646372300820 | 0.8505034414229327 | 0.0171867546622564 | T | T | T |
| 0.0855478614382384 | 0.8300316974345828 | 0.8998733996119362 | T | T | T |
| 0.1052521574787801 | 0.8388586735651725 | 0.7041882642036192 | T | T | T |
| 0.2308332566080888 | 0.8532961882322377 | 0.7598718852520785 | T | T | T |
| 0.3219048754413348 | 0.9465752940063387 | 0.8058940699081554 | T | T | T |
| 0.0892343464476262 | 0.9493547695703844 | 0.8128586632434419 | T | T | T |
| 0.4318926094545956 | 0.1271293524673521 | 0.5865308731437284 | T | T | T |
| 0.4187925643950554 | 0.9955206871668429 | 0.5662012717604795 | T | T | T |
| 0.3974872820508114 | 0.8635673076650445 | 0.5644270444734187 | T | T | T |
| 0.1990298049616491 | 0.1292558356401523 | 0.6152757444768818 | T | T | T |
| 0.1814343055819453 | 0.0013488294490863 | 0.5611637150496004 | T | T | T |
| 0.1977240155891367 | 0.8675273876792768 | 0.5671070274450546 | T | T | T |
| 0.9911197183173358 | 0.0397996793845364 | 0.7905153379693619 | T | T | T |
| 0.9862878092416872 | 0.8679951162062691 | 0.7812233698169836 | T | T | T |

**Structure files (CONTCAR) involved in this work:**

|                    |                    |                    |   |   |   |
|--------------------|--------------------|--------------------|---|---|---|
| 0.1436055729374827 | 0.9364434256334773 | 0.2167558467761241 | T | T | T |
| 0.1973386066778465 | 0.9316738113011838 | 0.3956995176849814 | T | T | T |
| 0.2991509440216571 | 0.9488169027802634 | 0.5227571682762616 | T | T | T |
| 0.4005576242657278 | 0.9294872534218038 | 0.3961606237161821 | T | T | T |
| 0.3978621920563567 | 0.9397190154332079 | 0.1990770608023511 | T | T | T |
| 0.2719106953322582 | 0.9669583554589057 | 0.2412840534525770 | T | T | T |
| 0.1421306045168010 | 0.1714102354529707 | 0.2446225415741387 | T | T | T |
| 0.1939822419354261 | 0.1569019300498371 | 0.4214984975210205 | T | T | T |
| 0.3107817504422127 | 0.1470878612528571 | 0.5125398542238232 | T | T | T |
| 0.4167464994933319 | 0.1678363802438289 | 0.3983006168728200 | T | T | T |
| 0.3961358951634887 | 0.1582175440668441 | 0.2034512795195473 | T | T | T |
| 0.2712293039120697 | 0.1426032877600922 | 0.2616152955860575 | T | T | T |
| 0.1786851969540103 | 0.0502353050105117 | 0.3052338273087760 | T | T | T |
| 0.4169901204318786 | 0.0480825005983395 | 0.3123049589040433 | T | T | T |
| 0.0677612753981816 | 0.8693938974714487 | 0.0892217197976186 | T | T | T |
| 0.0831373705612519 | 0.9996365771989280 | 0.0634605604285728 | T | T | T |
| 0.1044287147385557 | 0.1311688912092355 | 0.0644407157663832 | T | T | T |
| 0.3030242292754948 | 0.8673659991052416 | 0.1164637110120483 | T | T | T |
| 0.3212436211167405 | 0.9948367679781657 | 0.0608854703304254 | T | T | T |
| 0.3030133490901848 | 0.1283247449921907 | 0.0683298528374052 | T | T | T |
| 0.5118486280133007 | 0.9541941959471154 | 0.2909651266481484 | T | T | T |
| 0.5166549207429000 | 0.1334373119150715 | 0.2790589495468963 | T | T | T |
| 0.6353415167536952 | 0.5617634363631383 | 0.2708779509283055 | T | T | T |
| 0.7013964012563446 | 0.5724755849638862 | 0.1037873413195152 | T | T | T |
| 0.7957460613898144 | 0.5574072190212751 | 0.9623253613096346 | T | T | T |
| 0.8891596620040531 | 0.5785088564436158 | 0.1045611948234239 | T | T | T |
| 0.8867880342005618 | 0.5385288074642091 | 0.3155693629793949 | T | T | T |
| 0.7601443220178853 | 0.5203588336563791 | 0.2630734219021367 | T | T | T |
| 0.6413790432373496 | 0.3344157909253757 | 0.2648014907781082 | T | T | T |
| 0.6914478189443869 | 0.3334878399428269 | 0.0839324530368859 | T | T | T |
| 0.8081825477635391 | 0.3510229365587166 | 0.9916353804048108 | T | T | T |
| 0.9105676993212722 | 0.3210868397717361 | 0.1116019954635360 | T | T | T |
| 0.9105575208414817 | 0.3577634548682987 | 0.3034877487273936 | T | T | T |
| 0.7688035010246580 | 0.3677346676346097 | 0.2389883354000343 | T | T | T |
| 0.6695938563812466 | 0.4488186243476515 | 0.1742009975418104 | T | T | T |
| 0.9234061080006991 | 0.4491185209973083 | 0.1565898503348773 | T | T | T |
| 0.5704853166753234 | 0.6270073240437802 | 0.4125478227523229 | T | T | T |
| 0.5941007205165730 | 0.4978935158047130 | 0.4360159230705948 | T | T | T |
| 0.5829564953597473 | 0.3643648234659490 | 0.4386681235233201 | T | T | T |
| 0.7962569252633622 | 0.6310561378666273 | 0.3651317178273283 | T | T | T |
| 0.7949240812147532 | 0.5151748450087089 | 0.4561984768892232 | T | T | T |
| 0.8265251747754483 | 0.3880758272014670 | 0.4347594263931527 | T | T | T |
| 0.0119062364503997 | 0.5511607864431119 | 0.2221694544066874 | T | T | T |
| 0.022082377226380  | 0.3637813757833370 | 0.2003922382068548 | T | T | T |
| 0.8567445886106750 | 0.4346493471841082 | 0.7889934105958656 | T | T | T |
| 0.7946228986998892 | 0.4329621243141118 | 0.6129029183944608 | T | T | T |
| 0.6993165786998623 | 0.4212461650446092 | 0.4719510633136555 | T | T | T |
| 0.6021591190034208 | 0.4297010006841244 | 0.6067475293448640 | T | T | T |
| 0.6026632705276733 | 0.4424624802635774 | 0.8039980218129705 | T | T | T |
| 0.7288641739206807 | 0.4735335611529617 | 0.7712039200298864 | T | T | T |
| 0.8605607271380693 | 0.6816401733765938 | 0.7506201656089240 | T | T | T |
| 0.8158838717081581 | 0.6429314817509293 | 0.5594475572539852 | T | T | T |
| 0.6921787088805752 | 0.6475728242104630 | 0.4879451178578839 | T | T | T |

**Structure files (CONTCAR) involved in this work:**

|                    |                    |                    |   |   |   |
|--------------------|--------------------|--------------------|---|---|---|
| 0.5846643317681787 | 0.6680465564848960 | 0.5998058295213536 | T | T | T |
| 0.5958391976349686 | 0.6599355563297722 | 0.7966793396161090 | T | T | T |
| 0.7204129165504740 | 0.6473521632717177 | 0.7343305332503011 | T | T | T |
| 0.8268003132937329 | 0.5482440444642853 | 0.6926076123890175 | T | T | T |
| 0.5821682081156713 | 0.5485153374764594 | 0.6862775998602060 | T | T | T |
| 0.9308224800438899 | 0.3771945961596507 | 0.9298212349916504 | T | T | T |
| 0.9155761235543788 | 0.5101649370564316 | 0.9330768517540428 | T | T | T |
| 0.8982693260019533 | 0.6409928686257965 | 0.9325205958644190 | T | T | T |
| 0.6959356971370487 | 0.3721538960689673 | 0.8930235063530776 | T | T | T |
| 0.6759498268254229 | 0.5005546591377974 | 0.9458319566888650 | T | T | T |
| 0.6897712375543475 | 0.6341907588590397 | 0.9304477707992441 | T | T | T |
| 0.4892792813642559 | 0.4524362744582257 | 0.7094343416211980 | T | T | T |
| 0.4804107730583143 | 0.6318434097627171 | 0.7094130348934486 | T | T | T |
| 0.6429864389042549 | 0.9396196982105365 | 0.2871910771669265 | T | T | T |
| 0.7001920451763775 | 0.9325711316184122 | 0.1105287411111278 | T | T | T |
| 0.8017937715600088 | 0.9434316815351688 | 0.9810755036387211 | T | T | T |
| 0.9008394678770025 | 0.9284038001684796 | 0.1132606903015516 | T | T | T |
| 0.8992304158505386 | 0.9468004522156859 | 0.3102764772514324 | T | T | T |
| 0.7721529989335165 | 0.9657271332377291 | 0.2676736701218599 | T | T | T |
| 0.6418246091870500 | 0.1723620345982468 | 0.2534502584520906 | T | T | T |
| 0.6974142583752299 | 0.1571292590476011 | 0.0790297509560377 | T | T | T |
| 0.8109494849045727 | 0.1467158330246293 | 0.9794195390051779 | T | T | T |
| 0.9146104324895060 | 0.1678423031384039 | 0.0985435089992196 | T | T | T |
| 0.8978006025782013 | 0.1573651037250280 | 0.2959288424840499 | T | T | T |
| 0.7720877709765500 | 0.1459139637012063 | 0.2426910848769299 | T | T | T |
| 0.6823786650737408 | 0.0517619243264539 | 0.1981748449962239 | T | T | T |
| 0.9200756010518569 | 0.0490071813504444 | 0.1847874472241778 | T | T | T |
| 0.5706666687727694 | 0.8748524076696298 | 0.4218360380456312 | T | T | T |
| 0.5835610930805932 | 0.0064495941043586 | 0.4377295036861700 | T | T | T |
| 0.6008414274519661 | 0.1382221144714361 | 0.4358905602781115 | T | T | T |
| 0.8102401893533746 | 0.8708444401127947 | 0.3979262745669326 | T | T | T |
| 0.8190476246797134 | 0.9997639514333551 | 0.4468043802394893 | T | T | T |
| 0.8060490165558856 | 0.1334644710895390 | 0.4351690307322640 | T | T | T |
| 0.0127544287002768 | 0.9543667911947614 | 0.2168521670016781 | T | T | T |
| 0.0166453206162460 | 0.1378308144530647 | 0.2162235479391278 | T | T | T |
| 0.8603861674574207 | 0.0548396343810279 | 0.7850899645700947 | T | T | T |
| 0.8034260187836153 | 0.0720947609004641 | 0.6092749895093401 | T | T | T |
| 0.7020855831240738 | 0.0562843678901880 | 0.4806159483733978 | T | T | T |
| 0.6004802253180804 | 0.0743292608868432 | 0.6073405334643118 | T | T | T |
| 0.6050506032286563 | 0.0504420559834004 | 0.8041306557213596 | T | T | T |
| 0.7311920943302842 | 0.0289573428491257 | 0.7617943762098953 | T | T | T |
| 0.8591668875351085 | 0.8346362038168967 | 0.7667706877353582 | T | T | T |
| 0.8056276091428057 | 0.8318274594957474 | 0.5893736647131745 | T | T | T |
| 0.6936393772372235 | 0.8516380324094078 | 0.4865668420280883 | T | T | T |
| 0.5903163259923838 | 0.8276136661892315 | 0.6062897155060512 | T | T | T |
| 0.6034315133182453 | 0.8516587521053595 | 0.8007238400780691 | T | T | T |
| 0.7297176284331331 | 0.8599437373567828 | 0.7466865711679166 | T | T | T |
| 0.8199819640948086 | 0.9483011728310400 | 0.6811321865555818 | T | T | T |
| 0.5809736619875283 | 0.9518069596148785 | 0.6728230857555306 | T | T | T |
| 0.9332622431631887 | 0.1275169295657914 | 0.9102308573945412 | T | T | T |
| 0.9190413836676006 | 0.9976802758850841 | 0.9446318293993470 | T | T | T |
| 0.9075513617009798 | 0.8648654862501104 | 0.9442571729510350 | T | T | T |
| 0.6959449631595156 | 0.1285863092324467 | 0.8849723645857760 | T | T | T |

**Structure files (CONTCAR) involved in this work:**

|                    |                    |                    |   |   |   |
|--------------------|--------------------|--------------------|---|---|---|
| 0.6857950668153494 | 0.0018844482872210 | 0.9444330703403767 | T | T | T |
| 0.6965234934119005 | 0.8676782346357957 | 0.9399670255119822 | T | T | T |
| 0.4903472100085863 | 0.0461209463261071 | 0.7145853330111327 | T | T | T |
| 0.4852087632377688 | 0.8634498375335597 | 0.7156636385729754 | T | T | T |
| 0.3574757182086441 | 0.4380267958666124 | 0.7098883282574806 | T | T | T |
| 0.3038965131441225 | 0.4293568569746261 | 0.8893810468070532 | T | T | T |
| 0.2022282749968901 | 0.4563952266489766 | 0.0128200228415313 | T | T | T |
| 0.0972062227517412 | 0.4317892974105779 | 0.8959268585614784 | T | T | T |
| 0.1010997571086413 | 0.4424145516491582 | 0.6972492072162300 | T | T | T |
| 0.2286764638174524 | 0.4676865476605180 | 0.7372955600599768 | T | T | T |
| 0.3559544256504160 | 0.6705953647350170 | 0.7378500451400739 | T | T | T |
| 0.3038857503622292 | 0.6587974662233123 | 0.9148896855679763 | T | T | T |
| 0.1900055265034727 | 0.6444770248060706 | 0.0117441230698547 | T | T | T |
| 0.0867155677318124 | 0.6695248660746639 | 0.8936206329513188 | T | T | T |
| 0.1028665481773680 | 0.6565438233763558 | 0.6979131214938481 | T | T | T |
| 0.2279928601224274 | 0.6383897251643079 | 0.7537263029270410 | T | T | T |
| 0.3218172941144933 | 0.5497319705509341 | 0.8045352209058126 | T | T | T |
| 0.0798103738775364 | 0.5493152332006708 | 0.8110266314504280 | T | T | T |
| 0.4318808009003624 | 0.3754201171373877 | 0.5740518858726000 | T | T | T |
| 0.4191076937524541 | 0.5071296621662543 | 0.5636887955951151 | T | T | T |
| 0.3947880698632199 | 0.6381343800508309 | 0.5552768050931761 | T | T | T |
| 0.1949470211541544 | 0.3696539689568616 | 0.6119143550650992 | T | T | T |
| 0.1769983678969114 | 0.4972656604712927 | 0.5582258287449621 | T | T | T |
| 0.1943180930956348 | 0.6307013190552559 | 0.5599186898081391 | T | T | T |
| 0.9863033678469927 | 0.4532737745144381 | 0.7886634656846176 | T | T | T |
| 0.9832409078436911 | 0.6375295149220840 | 0.7770910967544736 | T | T | T |
| 0.1440598580025031 | 0.5625933636377476 | 0.2144062179412218 | T | T | T |
| 0.1989697555277610 | 0.5639386742913207 | 0.3912775617958354 | T | T | T |
| 0.2969381737536138 | 0.5485145298858921 | 0.5263813109052656 | T | T | T |
| 0.3928162592588294 | 0.5678253153644148 | 0.3908563550261439 | T | T | T |
| 0.3979289038839141 | 0.5543058385464508 | 0.1947327503751281 | T | T | T |
| 0.2716342722468206 | 0.5275090069395417 | 0.2339188362469854 | T | T | T |
| 0.1425529997605614 | 0.3237606169477910 | 0.2430512119538776 | T | T | T |
| 0.1931729492675058 | 0.3414439070929553 | 0.4192592839537043 | T | T | T |
| 0.3090623516825728 | 0.3528743427370331 | 0.5120445817005187 | T | T | T |
| 0.4106280102931318 | 0.3263840023517384 | 0.3898970498340851 | T | T | T |
| 0.3931417052738244 | 0.3427473441555504 | 0.1934205505051324 | T | T | T |
| 0.2706790646857683 | 0.3551502971812726 | 0.2582368807547767 | T | T | T |
| 0.1769126195320200 | 0.4465489844589067 | 0.3004423884133949 | T | T | T |
| 0.4127854747629669 | 0.4477378344721614 | 0.3140100528949895 | T | T | T |
| 0.0678992780073231 | 0.6221301117147930 | 0.0782477723959091 | T | T | T |
| 0.0812189111859721 | 0.4901049820400639 | 0.0747519304131489 | T | T | T |
| 0.1145131806258743 | 0.3608319687808416 | 0.0566521662106937 | T | T | T |
| 0.3044696822820757 | 0.6258206073506636 | 0.1072872462793516 | T | T | T |
| 0.3235326727510910 | 0.4973917898127355 | 0.0559928846468672 | T | T | T |
| 0.2952214654535185 | 0.3657331690929115 | 0.0617678209684162 | T | T | T |
| 0.5079069640262954 | 0.5397350306785428 | 0.2975038258463449 | T | T | T |
| 0.5117825506337084 | 0.3618728112841512 | 0.2713411222293842 | T | T | T |
| 0.4390916382301649 | 0.7492886617364545 | 0.6376640345602627 | T | T | T |
| 0.1952702338663171 | 0.7479034859826028 | 0.6484067888060757 | T | T | T |
| 0.2711071567913500 | 0.7472689388205402 | 0.0552523892825932 | T | T | T |
| 0.1077474768612287 | 0.7467907649991780 | 0.0501883479799395 | T | T | T |
| 0.0661217870828994 | 0.2476590834833814 | 0.1289146000356287 | T | T | T |

**Structure files (CONTCAR) involved in this work:**

|                    |                    |                    |   |   |   |
|--------------------|--------------------|--------------------|---|---|---|
| 0.3038604521300629 | 0.2479853509093826 | 0.1481470535356051 | T | T | T |
| 0.2287332949103659 | 0.2495781476240138 | 0.5540117933241536 | T | T | T |
| 0.3921785556312287 | 0.2504245305217443 | 0.5483146030584102 | T | T | T |
| 0.5579806629113510 | 0.2494858800852420 | 0.3535707057065186 | T | T | T |
| 0.8119034861558913 | 0.2523707372256541 | 0.3514042462938745 | T | T | T |
| 0.7281048191910746 | 0.2491524126050909 | 0.9414649631416581 | T | T | T |
| 0.8925266185132849 | 0.2508010626332096 | 0.9478621898103198 | T | T | T |
| 0.9455892331412330 | 0.7529916119755572 | 0.8588111956794876 | T | T | T |
| 0.6864375475185092 | 0.7523108426076504 | 0.8479753256623794 | T | T | T |
| 0.7755671804576602 | 0.7486142000545001 | 0.4454014973666801 | T | T | T |
| 0.6105131975089682 | 0.7501221381578348 | 0.4495274070822344 | T | T | T |
| 0.9322825316801229 | 0.4856197740412017 | 0.5216996897737893 | T | T | T |
| 0.8234644006784302 | 0.3354714032405237 | 0.3258311951576375 | T | T | T |
| 0.8003352806595894 | 0.6353626940487218 | 0.6933488344555800 | T | T | T |
| 0.9267952250710187 | 0.5312980652333689 | 0.1977737634648673 | T | T | T |
| 0.9267528091105737 | 0.4174626321798026 | 0.4183795278153284 | T | T | T |
| 0.8671553595700622 | 0.5542039082347299 | 0.5535717773188384 | T | T | T |
| 0.9918551468908837 | 0.6464738127474734 | 0.3476192217344756 | T | T | T |
| 0.9986244991597878 | 0.5643627734594172 | 0.4160406207587956 | T | T | T |
| 0.9580505667423397 | 0.4696345065689383 | 0.5789799994243706 | T | T | T |
| 0.0763540178019395 | 0.6102115178750434 | 0.3755192471164324 | T | T | T |
| 0.0460899382414334 | 0.4481847565710252 | 0.4593953312112254 | T | T | T |
| 0.0385019282889779 | 0.3740980065923566 | 0.3717899838196598 | T | T | T |
| 0.0222473155904212 | 0.6051275743914013 | 0.3750123517197135 | T | T | T |
| 0.0146151822435534 | 0.4131633801447450 | 0.4169905758845120 | T | T | T |

**Figure S17 ZnNi-FS**

Si O Al Ni Zn H C

1.0000000000000000

20.0219999999999985 0.0000000000000000 0.0000000000000000

0.0000000000000000 19.8990000000000009 0.0000000000000000

0.0000000000000000 0.0000000000000000 13.3829999999999991

93 193 3 1 1 6 2

Selective dynamics

Direct

|                    |                    |                    |   |   |   |
|--------------------|--------------------|--------------------|---|---|---|
| 0.4236109775139318 | 0.0576418841208748 | 0.6470903715000853 | T | T | T |
| 0.3053748956483399 | 0.0270437390182836 | 0.7925306347655185 | T | T | T |
| 0.2827871248671296 | 0.0590859804494359 | 0.0140628846912840 | T | T | T |
| 0.1231866908594058 | 0.0616617943572653 | 0.0108273264772457 | T | T | T |
| 0.0692868548683462 | 0.0292964142921880 | 0.7995306805024281 | T | T | T |
| 0.1808062111580359 | 0.0562226239147084 | 0.6581117359040123 | T | T | T |
| 0.4207518625499934 | 0.8265369220278437 | 0.6684320631613555 | T | T | T |
| 0.3047097857019485 | 0.8682294885438228 | 0.8094200445661897 | T | T | T |
| 0.2672756638433218 | 0.8279002101036519 | 0.0278398884855853 | T | T | T |
| 0.1129257762806843 | 0.8251135705950506 | 0.0133908653193857 | T | T | T |
| 0.0660809159643093 | 0.8719838472436782 | 0.7996959767339916 | T | T | T |
| 0.1830355320501721 | 0.8271640114885286 | 0.6721336928075060 | T | T | T |
| 0.0781331705680394 | 0.9406852605859028 | 0.1480788650092394 | T | T | T |
| 0.1967997692217376 | 0.9711011893558290 | 0.2926080124620908 | T | T | T |
| 0.2191813433992282 | 0.9372550072482804 | 0.5143587569321174 | T | T | T |
| 0.3791949716292080 | 0.9344469040522289 | 0.5125649257208509 | T | T | T |
| 0.4338182332736960 | 0.9679654662008426 | 0.3010131189274833 | T | T | T |
| 0.3218252981493980 | 0.9417132081530620 | 0.1591486996541863 | T | T | T |
| 0.0827349143920155 | 0.1718832004179280 | 0.1646113490364651 | T | T | T |



**Structure files (CONTCAR) involved in this work:**

|                    |                    |                    |   |   |   |
|--------------------|--------------------|--------------------|---|---|---|
| 0.1966618095137041 | 0.1296711327358289 | 0.3087565500076735 | T | T | T |
| 0.2335402463750408 | 0.1708146300470057 | 0.5257812060052948 | T | T | T |
| 0.3882397664127902 | 0.1734182854151791 | 0.5102572115013140 | T | T | T |
| 0.4366676134841877 | 0.1263513440723268 | 0.2976606789803322 | T | T | T |
| 0.3177128434716528 | 0.1696732029082021 | 0.1719181211701407 | T | T | T |
| 0.5773616662021617 | 0.5551350935967416 | 0.3554196708739443 | T | T | T |
| 0.6916558066352148 | 0.5255427395798352 | 0.2022412446946820 | T | T | T |
| 0.7146448563253790 | 0.5669334899766814 | 0.9864385305240295 | T | T | T |
| 0.8726920489691730 | 0.5714683271985198 | 0.9894444294805705 | T | T | T |
| 0.8117915691698933 | 0.5475790880040964 | 0.3458357710481933 | T | T | T |
| 0.5737232543075966 | 0.3275852257118279 | 0.3309475453498060 | T | T | T |
| 0.6954801184279221 | 0.3712709900683389 | 0.1936563358682263 | T | T | T |
| 0.7302954226526235 | 0.3261504337346924 | 0.9806762033551015 | T | T | T |
| 0.8848119721176315 | 0.3251744971814974 | 0.9947116869457877 | T | T | T |
| 0.9416873982828714 | 0.3756212573756071 | 0.1871625514231519 | T | T | T |
| 0.9204845199835957 | 0.4449328868631734 | 0.8624523603850199 | T | T | T |
| 0.7992183063109000 | 0.4710720127039091 | 0.7217905469841601 | T | T | T |
| 0.7735867009329510 | 0.4347224232755367 | 0.4969389658422614 | T | T | T |
| 0.6164642334866000 | 0.4280421935062738 | 0.4901106343584024 | T | T | T |
| 0.5681640930367464 | 0.4681838648403904 | 0.7030710364208763 | T | T | T |
| 0.6744220615627620 | 0.4464029990685870 | 0.8586573296010241 | T | T | T |
| 0.9204527267069943 | 0.6765577758388691 | 0.8316520800502294 | T | T | T |
| 0.7706158082359447 | 0.6681742686127576 | 0.4627306628531814 | T | T | T |
| 0.6152665396530832 | 0.6722079548290866 | 0.4865400046051236 | T | T | T |
| 0.5620702260518283 | 0.6264593626989503 | 0.6982269359741308 | T | T | T |
| 0.6732743178218209 | 0.6735425442901728 | 0.8272701773013030 | T | T | T |
| 0.5791557950866882 | 0.9440486669932325 | 0.3577141917779929 | T | T | T |
| 0.6994367612653577 | 0.9727922240077391 | 0.2139423742440204 | T | T | T |
| 0.7218514367077512 | 0.9373784771433300 | 0.9918501702875436 | T | T | T |
| 0.8821377222999391 | 0.9339241432810311 | 0.9948065454193085 | T | T | T |
| 0.9341816594967971 | 0.9694378206965357 | 0.2049068551584031 | T | T | T |
| 0.8238375505817347 | 0.9455290364524011 | 0.3530520063097486 | T | T | T |
| 0.5793935380690739 | 0.1727307072964672 | 0.3287393621452956 | T | T | T |
| 0.6991514960328570 | 0.1316420462145883 | 0.1928406878911911 | T | T | T |
| 0.7331340624546036 | 0.1701549583099598 | 0.9715841816361505 | T | T | T |
| 0.8878078162271797 | 0.1728654279250315 | 0.9838140925676301 | T | T | T |
| 0.9374985024880800 | 0.1274765013340145 | 0.1973903206192217 | T | T | T |
| 0.8219486114769012 | 0.1737751322260663 | 0.3297006396458278 | T | T | T |
| 0.9244133323373870 | 0.0541835150482246 | 0.8555581968829757 | T | T | T |
| 0.8038615413010463 | 0.0253138269839583 | 0.7075741675012734 | T | T | T |
| 0.7825698577517948 | 0.0658479724395787 | 0.4904574176858532 | T | T | T |
| 0.6221171011355084 | 0.0688783351830746 | 0.4897127101463221 | T | T | T |
| 0.5686440618526059 | 0.0314004181469755 | 0.6985335027856093 | T | T | T |
| 0.6803840764690181 | 0.0530451459728306 | 0.8464413197129580 | T | T | T |
| 0.9239246464465731 | 0.8289874152553672 | 0.8365397016606513 | T | T | T |
| 0.8036950267097414 | 0.8677349539423587 | 0.6946380269230332 | T | T | T |
| 0.7714107198390144 | 0.8255834071327299 | 0.4777548146113907 | T | T | T |
| 0.6161781199285182 | 0.8260657240933974 | 0.4911976964303227 | T | T | T |
| 0.5648665548577277 | 0.8744237605347763 | 0.6988525789551522 | T | T | T |
| 0.6800155823312483 | 0.8323106586277251 | 0.8322715254419986 | T | T | T |
| 0.4237966312973932 | 0.4439799150822338 | 0.6402655075560566 | T | T | T |
| 0.3046637813049682 | 0.4709793946836723 | 0.7874998452019654 | T | T | T |
| 0.2819231329826892 | 0.4373587480026275 | 0.0062016644791741 | T | T | T |

**Structure files (CONTCAR) involved in this work:**

|                    |                    |                    |   |   |   |
|--------------------|--------------------|--------------------|---|---|---|
| 0.1243655872537896 | 0.4361520652302217 | 0.0109884501608739 | T | T | T |
| 0.0655279477407922 | 0.4695841793987881 | 0.8018541615670129 | T | T | T |
| 0.1777700961980383 | 0.4440411293125688 | 0.6557367581537557 | T | T | T |
| 0.4186123483708041 | 0.6726452060343471 | 0.6602999808472187 | T | T | T |
| 0.3029766796520899 | 0.6288747122900555 | 0.8036501190267622 | T | T | T |
| 0.2682320106652237 | 0.6703222310882135 | 0.0216507987304194 | T | T | T |
| 0.1140496525089611 | 0.6713654123737410 | 0.0084463789323206 | T | T | T |
| 0.0634782741056575 | 0.6281508410635199 | 0.7973570347904002 | T | T | T |
| 0.1812000481185231 | 0.6684595687859428 | 0.6677813488660409 | T | T | T |
| 0.0753876291092397 | 0.5568693177845393 | 0.1489905250285183 | T | T | T |
| 0.1981432357499646 | 0.5265699644182530 | 0.2853467665220767 | T | T | T |
| 0.2197329744010037 | 0.5603382862723961 | 0.5116564709985084 | T | T | T |
| 0.3779719846114530 | 0.5661250250909275 | 0.5087446927306591 | T | T | T |
| 0.4299250635503881 | 0.5279523883069346 | 0.2988522472508812 | T | T | T |
| 0.3236134636135177 | 0.5532894224667297 | 0.1481772771358212 | T | T | T |
| 0.0866557157266019 | 0.3247242015561593 | 0.1583594843335841 | T | T | T |
| 0.1963746117971890 | 0.3685368795590989 | 0.3067136548148205 | T | T | T |
| 0.2320390150665993 | 0.3291389696496821 | 0.5254469304298227 | T | T | T |
| 0.3863680522003630 | 0.3269982985248181 | 0.5056262878900942 | T | T | T |
| 0.4324187849338190 | 0.3705662013139143 | 0.2920875483486090 | T | T | T |
| 0.3149331168843749 | 0.3281783922059403 | 0.1668439645735856 | T | T | T |
| 0.3581734677295036 | 0.0629122965139723 | 0.7179468835092974 | T | T | T |
| 0.3103398660858522 | 0.0638639499115756 | 0.9003563567592605 | T | T | T |
| 0.2026945850674046 | 0.0464065213741802 | 0.0149144082749670 | T | T | T |
| 0.0972745002725196 | 0.0689481048897697 | 0.8969164476810078 | T | T | T |
| 0.1047531003686036 | 0.0589402885146402 | 0.6997440793828154 | T | T | T |
| 0.2299484034492020 | 0.0349589487930016 | 0.7495760729951765 | T | T | T |
| 0.3608099255973589 | 0.8257389172473353 | 0.7496550437513134 | T | T | T |
| 0.3066228110313680 | 0.8445196436789805 | 0.9248733154825963 | T | T | T |
| 0.1899020792016800 | 0.8517890264099021 | 0.0165500181108419 | T | T | T |
| 0.0854614695274784 | 0.8307171700204715 | 0.9000139190193505 | T | T | T |
| 0.1056453595252414 | 0.8396260862392753 | 0.7047481738631153 | T | T | T |
| 0.2310691673021984 | 0.8534176165318788 | 0.7625135361260863 | T | T | T |
| 0.3228778907391981 | 0.9475528564990019 | 0.8012669689525236 | T | T | T |
| 0.0873827204706671 | 0.9501393463831176 | 0.8126636446680010 | T | T | T |
| 0.4321558833922798 | 0.1275269671283708 | 0.5856279829520447 | T | T | T |
| 0.4173690148339811 | 0.9959051385595086 | 0.5680985783847069 | T | T | T |
| 0.3967231502435041 | 0.8638216913720447 | 0.5667990620611966 | T | T | T |
| 0.2003734992022480 | 0.1304133417813029 | 0.6180228130193621 | T | T | T |
| 0.1846480003355898 | 0.0015159175347165 | 0.5683161965459890 | T | T | T |
| 0.1992621834846036 | 0.8674081538040304 | 0.5694338500676247 | T | T | T |
| 0.9895325459050234 | 0.0404656067980943 | 0.7863797683368230 | T | T | T |
| 0.9860284356248157 | 0.8668326940672310 | 0.7807833374894732 | T | T | T |
| 0.1443982802087422 | 0.9353192142319741 | 0.2173662050095259 | T | T | T |
| 0.1923590443729362 | 0.9337075653432211 | 0.4001349853231713 | T | T | T |
| 0.2994706208065481 | 0.9481298674762205 | 0.5171786729489024 | T | T | T |
| 0.4046296796345512 | 0.9289112019641221 | 0.3982376531984212 | T | T | T |
| 0.3977262904687680 | 0.9389522136316123 | 0.2013942184977972 | T | T | T |
| 0.2723253804155045 | 0.9643417060977891 | 0.2495975689659177 | T | T | T |
| 0.1421059176843498 | 0.1725219046046073 | 0.2467993197425686 | T | T | T |
| 0.1931342761578606 | 0.1544559807294257 | 0.4237505332046710 | T | T | T |
| 0.3109603058139061 | 0.1478101688751892 | 0.5119482926059645 | T | T | T |
| 0.4169680561603644 | 0.1680630825503265 | 0.3976058561523319 | T | T | T |

**Structure files (CONTCAR) involved in this work:**

|                    |                    |                    |   |   |   |
|--------------------|--------------------|--------------------|---|---|---|
| 0.3954842689109666 | 0.1575052924679744 | 0.2032157925474694 | T | T | T |
| 0.2711057109899830 | 0.1434985370132496 | 0.2640996808351891 | T | T | T |
| 0.1781716262885315 | 0.0503511528451725 | 0.3021906829938668 | T | T | T |
| 0.4177814112213379 | 0.0477256450012450 | 0.3129834705041645 | T | T | T |
| 0.0678979799062102 | 0.8702296163714770 | 0.0886668409600665 | T | T | T |
| 0.0841398513521036 | 0.0007404721108955 | 0.0661826867100263 | T | T | T |
| 0.1068102825786883 | 0.1321651315648373 | 0.0654799056846093 | T | T | T |
| 0.3019116352352795 | 0.8674642015571853 | 0.1198317747837871 | T | T | T |
| 0.3186760143051116 | 0.9957046283762080 | 0.0682808963126788 | T | T | T |
| 0.3005649514154725 | 0.1290337758648163 | 0.0701023626330997 | T | T | T |
| 0.5133199062012774 | 0.9543761380150643 | 0.2887473075956154 | T | T | T |
| 0.5164909040984497 | 0.1334883937858509 | 0.2774970980454743 | T | T | T |
| 0.6386382522789831 | 0.5603894051311455 | 0.2772399868844541 | T | T | T |
| 0.6995064330602069 | 0.5735555025770408 | 0.1054548654044174 | T | T | T |
| 0.7937291649790295 | 0.5572833547500694 | 0.9634504834123306 | T | T | T |
| 0.8850705645212303 | 0.5777271733785657 | 0.1075518375333909 | T | T | T |
| 0.8885689397234504 | 0.5248236734028329 | 0.3206652811999075 | T | T | T |
| 0.7634922183040890 | 0.5217180496389205 | 0.2594780129990670 | T | T | T |
| 0.6416278954659013 | 0.3354719991991117 | 0.2675699654371788 | T | T | T |
| 0.6913897585371304 | 0.3326729711633985 | 0.0863616700904765 | T | T | T |
| 0.8076150318273038 | 0.3508357808076719 | 0.9921249783083093 | T | T | T |
| 0.9104333292891194 | 0.3199687262497049 | 0.1106402357482643 | T | T | T |
| 0.9097513034063813 | 0.3648217975895030 | 0.3014006331143007 | T | T | T |
| 0.7691987409315044 | 0.3680723356295012 | 0.2399426400066660 | T | T | T |
| 0.6708045620964905 | 0.4491258719963929 | 0.1752814914850560 | T | T | T |
| 0.9242448119752518 | 0.4487709428185060 | 0.1486581969455521 | T | T | T |
| 0.5696904205802175 | 0.6266526560194117 | 0.4126621545060982 | T | T | T |
| 0.5909800261907826 | 0.4973236059321046 | 0.4389395013035154 | T | T | T |
| 0.5802250275038152 | 0.3638446678539885 | 0.4399411907099162 | T | T | T |
| 0.8040310429149066 | 0.6278622411051172 | 0.3680719838542964 | T | T | T |
| 0.7919220054479306 | 0.5132999106501128 | 0.4573014335344446 | T | T | T |
| 0.8243288190774299 | 0.3865360488884350 | 0.4368668895043742 | T | T | T |
| 0.0102198616251387 | 0.5514856902682664 | 0.2176902009810671 | T | T | T |
| 0.0215522037667353 | 0.3636661246274540 | 0.2005515902064765 | T | T | T |
| 0.8563482428962703 | 0.4344551313045099 | 0.7877306927985593 | T | T | T |
| 0.7888888315252495 | 0.4319310791502954 | 0.6154760126613718 | T | T | T |
| 0.6967129866512322 | 0.4201988323404800 | 0.4707485522488674 | T | T | T |
| 0.6016175009648603 | 0.4286530624361665 | 0.6087639360436523 | T | T | T |
| 0.6015738239155087 | 0.4417927433740362 | 0.8062030311908610 | T | T | T |
| 0.7279088540030177 | 0.4736850209394489 | 0.7762566503852467 | T | T | T |
| 0.8610606388560892 | 0.6798320890674917 | 0.7520085904791537 | T | T | T |
| 0.8142048703954289 | 0.6436618653197496 | 0.5618147895720573 | T | T | T |
| 0.6931456423777449 | 0.6464413960888177 | 0.4800756363180627 | T | T | T |
| 0.5880551049019389 | 0.6663679880757539 | 0.5996674217965646 | T | T | T |
| 0.5950179892175698 | 0.6603417670458522 | 0.7970130239790159 | T | T | T |
| 0.7192970844124124 | 0.6484089230333873 | 0.7355724357567094 | T | T | T |
| 0.8234713813237968 | 0.5479951585722330 | 0.6948412014445899 | T | T | T |
| 0.5825873143252035 | 0.5477919939702373 | 0.6880526981655887 | T | T | T |
| 0.9299436145499056 | 0.3768833490210540 | 0.9286663852982826 | T | T | T |
| 0.9133190283335071 | 0.5096480691974050 | 0.9344607998614504 | T | T | T |
| 0.8975660253624199 | 0.6401762611630513 | 0.9347943231282511 | T | T | T |
| 0.6943659967118829 | 0.3719618557015575 | 0.8961715851246388 | T | T | T |
| 0.6735859997783060 | 0.5005337640664954 | 0.9490866444399716 | T | T | T |

**Structure files (CONTCAR) involved in this work:**

|                    |                    |                    |   |   |   |
|--------------------|--------------------|--------------------|---|---|---|
| 0.6882582946051647 | 0.6341731703303604 | 0.9314687021531217 | T | T | T |
| 0.4888430477509908 | 0.4522608159335184 | 0.7112824985352917 | T | T | T |
| 0.4813124988170757 | 0.6318056135410169 | 0.7076649074070595 | T | T | T |
| 0.6443377163567457 | 0.9384945368082518 | 0.2865258531645080 | T | T | T |
| 0.6988996257476510 | 0.9334880339447961 | 0.1078280672662886 | T | T | T |
| 0.8023383873462913 | 0.9453774116781315 | 0.9821545601860380 | T | T | T |
| 0.9024947726456348 | 0.9278120709415972 | 0.1116689652336377 | T | T | T |
| 0.8992708569741754 | 0.9464956572660613 | 0.3088721753316498 | T | T | T |
| 0.7730417605966848 | 0.9652487114176055 | 0.2631716479011079 | T | T | T |
| 0.6416435720475386 | 0.1729625676700824 | 0.2517751462184364 | T | T | T |
| 0.6964680208766983 | 0.1553037718935874 | 0.0771868883948866 | T | T | T |
| 0.8108241791246849 | 0.1465567233724338 | 0.9800495798248492 | T | T | T |
| 0.9154241352974811 | 0.1675678615330950 | 0.0971419408510620 | T | T | T |
| 0.8981948448854804 | 0.1558949812996113 | 0.2943576204664882 | T | T | T |
| 0.7719397372098810 | 0.1470987622690716 | 0.2408747173624671 | T | T | T |
| 0.6821705794354991 | 0.0518359683576676 | 0.1995683423275283 | T | T | T |
| 0.9210017216663635 | 0.0484003201950162 | 0.1826439040023295 | T | T | T |
| 0.5713576333992680 | 0.8745287440716880 | 0.4206878888241713 | T | T | T |
| 0.5845030968152364 | 0.0060777243729000 | 0.4362547547539032 | T | T | T |
| 0.6009213098415693 | 0.1380958383993018 | 0.4339885726176956 | T | T | T |
| 0.8092128434827833 | 0.8702665721023183 | 0.3944360353045394 | T | T | T |
| 0.8176459051427428 | 0.9991515386221781 | 0.4437463079716171 | T | T | T |
| 0.8058328635252082 | 0.1333243108987039 | 0.4330777440524606 | T | T | T |
| 0.0134465446308155 | 0.9542087611945729 | 0.2179835519162469 | T | T | T |
| 0.0172881411132264 | 0.1376581153215034 | 0.2149961720363620 | T | T | T |
| 0.8586110732440208 | 0.0541889024752511 | 0.7853662588243187 | T | T | T |
| 0.8052070885884268 | 0.0710184260193839 | 0.6069688777166498 | T | T | T |
| 0.7020037573644338 | 0.0569394731410022 | 0.4817725568131856 | T | T | T |
| 0.5988358868958372 | 0.0747646449377970 | 0.6056368662365911 | T | T | T |
| 0.6048192110688512 | 0.0517243429861479 | 0.8026734977757233 | T | T | T |
| 0.7300537569727978 | 0.0290950790073528 | 0.7573067403643794 | T | T | T |
| 0.8594289293718478 | 0.8328446653617541 | 0.7641611876226192 | T | T | T |
| 0.8070480090087536 | 0.8313255821151962 | 0.5861084603670581 | T | T | T |
| 0.6940492507078199 | 0.8499795804173601 | 0.4866445009152433 | T | T | T |
| 0.5896413619614819 | 0.8281852539892189 | 0.6056394935622252 | T | T | T |
| 0.6040737742956087 | 0.8523023566753554 | 0.7998930197241384 | T | T | T |
| 0.7299688964451827 | 0.8571278916648495 | 0.7431312496680571 | T | T | T |
| 0.8196754636777980 | 0.9472394546200521 | 0.6807480075190898 | T | T | T |
| 0.5805090985542791 | 0.9524285927634142 | 0.6724515486139975 | T | T | T |
| 0.9325431629672937 | 0.1273290901555824 | 0.9085215933750062 | T | T | T |
| 0.9201579738484230 | 0.9971646559909116 | 0.9426275573757227 | T | T | T |
| 0.9057522853283906 | 0.8645973334683222 | 0.9422617968645179 | T | T | T |
| 0.6971820977987978 | 0.1289773684511439 | 0.8820739476871242 | T | T | T |
| 0.6863256403685630 | 0.0024791073048405 | 0.9412752916390800 | T | T | T |
| 0.6986588169169901 | 0.8686345524055028 | 0.9370947271826769 | T | T | T |
| 0.4896787851311946 | 0.0466145387838063 | 0.7150305411154086 | T | T | T |
| 0.4852616802012024 | 0.8639674595512379 | 0.7169334542812337 | T | T | T |
| 0.3571419846619228 | 0.4384006081372706 | 0.7088852120478365 | T | T | T |
| 0.3084541315504181 | 0.4293603295558567 | 0.8919054518045135 | T | T | T |
| 0.2029959270694020 | 0.4567904890462278 | 0.0077207106276928 | T | T | T |
| 0.0950833180240246 | 0.4304379337472623 | 0.8981719644537018 | T | T | T |
| 0.1016109063541581 | 0.4431708258393740 | 0.6994649232617834 | T | T | T |
| 0.2288831622896269 | 0.4659735865283147 | 0.7440301057512833 | T | T | T |

**Structure files (CONTCAR) involved in this work:**

|                    |                    |                    |   |   |   |
|--------------------|--------------------|--------------------|---|---|---|
| 0.3566042704109342 | 0.6701192637343897 | 0.7376622330129126 | T | T | T |
| 0.3059074773381925 | 0.6589266368031068 | 0.9157098402796490 | T | T | T |
| 0.1912459270530395 | 0.6453237230928661 | 0.0114863137475446 | T | T | T |
| 0.0879413078551881 | 0.6707914307177321 | 0.8937119022807297 | T | T | T |
| 0.1035159173113534 | 0.6548946912192938 | 0.6986016438731832 | T | T | T |
| 0.2285108720638577 | 0.6384807033612231 | 0.7565263457737464 | T | T | T |
| 0.3227264267092985 | 0.5496550119945603 | 0.8053007201851701 | T | T | T |
| 0.0803494251650933 | 0.5491504307253786 | 0.8149646538493427 | T | T | T |
| 0.4321844580201031 | 0.3760141457845669 | 0.5740822777465800 | T | T | T |
| 0.4210831787178642 | 0.5080608533338075 | 0.5646587881977964 | T | T | T |
| 0.3960106260878566 | 0.6393054645471905 | 0.5545496154814172 | T | T | T |
| 0.1959676449320095 | 0.3692875914581860 | 0.6161117486508882 | T | T | T |
| 0.1808068129092210 | 0.4973207692209080 | 0.5633461846973079 | T | T | T |
| 0.1967893340255504 | 0.6307331485292099 | 0.5623507549629876 | T | T | T |
| 0.9857357744179022 | 0.4545155066383513 | 0.7894315739398780 | T | T | T |
| 0.9838243032894458 | 0.6368259426666411 | 0.7798856504243716 | T | T | T |
| 0.1428314796140019 | 0.5643854610651440 | 0.2177651155320258 | T | T | T |
| 0.2000236150262860 | 0.5630378369036000 | 0.3942347480870315 | T | T | T |
| 0.2994250238420697 | 0.5488641271804582 | 0.5258574311211311 | T | T | T |
| 0.3963750206531952 | 0.5686944083947630 | 0.3912369127177557 | T | T | T |
| 0.3983779078808111 | 0.5554578632231557 | 0.1950279706845748 | T | T | T |
| 0.2716922063052324 | 0.5303819949751215 | 0.2354169643108692 | T | T | T |
| 0.1419268874376537 | 0.3242970949060017 | 0.2468370168934105 | T | T | T |
| 0.1923732799209270 | 0.3456113390703482 | 0.4225779077138870 | T | T | T |
| 0.3092759102363663 | 0.3532242524898082 | 0.5129877928517558 | T | T | T |
| 0.4107468381171078 | 0.3273778404225772 | 0.3900405183448086 | T | T | T |
| 0.3926991859282840 | 0.3434052662390851 | 0.1940278527851059 | T | T | T |
| 0.2704161689254476 | 0.3546380545192083 | 0.2613675084775554 | T | T | T |
| 0.1771850586677987 | 0.4478267430874600 | 0.2981982143347665 | T | T | T |
| 0.4138185486196425 | 0.4486092311879827 | 0.3136587012836917 | T | T | T |
| 0.0689561459773643 | 0.6229917911181253 | 0.0776591439321025 | T | T | T |
| 0.0837066018721182 | 0.4912812560685857 | 0.0756846432061977 | T | T | T |
| 0.1165138063782062 | 0.3618485341952829 | 0.0600949218914184 | T | T | T |
| 0.3053950681521743 | 0.6277191474742461 | 0.1083465853521211 | T | T | T |
| 0.3228702606578435 | 0.4987192937677112 | 0.0578658114574460 | T | T | T |
| 0.2941822371600318 | 0.3669086517433242 | 0.0646681682754523 | T | T | T |
| 0.5098126333668304 | 0.5396896249155114 | 0.2936728026194151 | T | T | T |
| 0.5117910091209158 | 0.3618516000545992 | 0.2702338846375539 | T | T | T |
| 0.4397026389700689 | 0.7498253607390977 | 0.6392955403912006 | T | T | T |
| 0.1953223029504911 | 0.7478178232451257 | 0.6514303405358134 | T | T | T |
| 0.2719062023112732 | 0.7486035802533478 | 0.0532062494873163 | T | T | T |
| 0.1090527874059310 | 0.7477026037163442 | 0.0503133038255510 | T | T | T |
| 0.0669101471791105 | 0.2483354686203961 | 0.1298734278536869 | T | T | T |
| 0.3036514067710594 | 0.2485035129135477 | 0.1495604162937058 | T | T | T |
| 0.2282842587230000 | 0.2500653673741245 | 0.5517786183873055 | T | T | T |
| 0.3926222829145947 | 0.2508672021844996 | 0.5477641808732117 | T | T | T |
| 0.5574932398156935 | 0.2493520779263224 | 0.3524824831528325 | T | T | T |
| 0.8153653073455165 | 0.2526115995020093 | 0.3492169792760303 | T | T | T |
| 0.7276684971392333 | 0.2489851935339206 | 0.9425518509842191 | T | T | T |
| 0.8918244714759712 | 0.2505337006356488 | 0.9465141898444223 | T | T | T |
| 0.9449639836676560 | 0.7522083384106285 | 0.8601745646486065 | T | T | T |
| 0.6855578580656959 | 0.7525306227497633 | 0.8502263517143756 | T | T | T |
| 0.7767770284988788 | 0.7475127385987860 | 0.4419602455099139 | T | T | T |

**Structure files (CONTCAR) involved in this work:**

|                    |                    |                    |   |   |   |
|--------------------|--------------------|--------------------|---|---|---|
| 0.6103587470503019 | 0.7495903063118692 | 0.4498249271536018 | T | T | T |
| 0.9188020129195015 | 0.4810882987704211 | 0.5312734516008416 | T | T | T |
| 0.8245536669522139 | 0.3363757518897373 | 0.3262760668716947 | T | T | T |
| 0.7990393351892963 | 0.6355143827446470 | 0.6961401280543827 | T | T | T |
| 0.9275595380099929 | 0.5296991857179233 | 0.1950254077166557 | T | T | T |
| 0.9193520984670625 | 0.4344065225256370 | 0.4062661595021300 | T | T | T |
| 0.8629277249576882 | 0.5563077393198662 | 0.5573880262908512 | T | T | T |
| 0.0045554158638482 | 0.5587914535288846 | 0.4139898154619808 | T | T | T |
| 0.0421706051715535 | 0.5212998870109283 | 0.5228950325060407 | T | T | T |
| 0.9543348418335051 | 0.4705939458241739 | 0.5785688268680138 | T | T | T |
| 0.0866555980628324 | 0.5309672922537059 | 0.4095627319433614 | T | T | T |
| 0.0315539350155955 | 0.4077359493976135 | 0.4485373861059229 | T | T | T |
| 0.0269693691025361 | 0.4434622983505768 | 0.3232102505043356 | T | T | T |
| 0.0374201801727503 | 0.5185475409958019 | 0.4413399985197515 | T | T | T |
| 0.0166552211446742 | 0.4514119934333123 | 0.4026948515930173 | T | T | T |

**Figure S17 ZnCu-IS**

Si O Al Cu Zn H C

1.0000000000000000

20.0219999999999985 0.0000000000000000 0.0000000000000000

0.0000000000000000 19.8990000000000009 0.0000000000000000

0.0000000000000000 0.0000000000000000 13.3829999999999991

93 193 3 1 1 6 2

Selective dynamics

Direct

|                    |                    |                    |   |   |   |
|--------------------|--------------------|--------------------|---|---|---|
| 0.4243479482321308 | 0.0569721793550831 | 0.6474596609120674 | T | T | T |
| 0.3048015883504920 | 0.0264788630834405 | 0.7919244076539815 | T | T | T |
| 0.2828771661515828 | 0.0598211947631072 | 0.0133895084036977 | T | T | T |
| 0.1237151186277658 | 0.0611548586356570 | 0.0112456736484025 | T | T | T |
| 0.0707185252509008 | 0.0291301286524610 | 0.7998992544953951 | T | T | T |
| 0.1804838000975715 | 0.0548160154996445 | 0.6549115898898099 | T | T | T |
| 0.4209985418764333 | 0.8261398081323830 | 0.6674887185080615 | T | T | T |
| 0.3046323973603710 | 0.8682995060051779 | 0.8092821011900644 | T | T | T |
| 0.2665269518750916 | 0.8272431593430771 | 0.0271956303266931 | T | T | T |
| 0.1119340364746599 | 0.8255589226278881 | 0.0131808259813371 | T | T | T |
| 0.0660825358638867 | 0.8720401173972177 | 0.7990546092397568 | T | T | T |
| 0.1833186994615217 | 0.8279020123904478 | 0.6713088121163897 | T | T | T |
| 0.0772880131912373 | 0.9412179904448899 | 0.1479190630851650 | T | T | T |
| 0.1975732275429118 | 0.9716375254283260 | 0.2911163804143302 | T | T | T |
| 0.2197043494330645 | 0.9369527020579884 | 0.5129312418582413 | T | T | T |
| 0.3794026409640963 | 0.9343737947482935 | 0.5129752114725091 | T | T | T |
| 0.4327461358697419 | 0.9682470747945171 | 0.3005809884421068 | T | T | T |
| 0.3224968379165501 | 0.9427594895665611 | 0.1550348028811891 | T | T | T |
| 0.0821714985732686 | 0.1704568516607388 | 0.1652550869360422 | T | T | T |
| 0.1970088033616020 | 0.1296773695265356 | 0.3095744545468335 | T | T | T |
| 0.2341578539663817 | 0.1708537289398852 | 0.5262319213205660 | T | T | T |
| 0.3886311793868576 | 0.1729349638137600 | 0.5105784198757002 | T | T | T |
| 0.4369140818852262 | 0.1265499079835027 | 0.2975505241908059 | T | T | T |
| 0.3178960338050780 | 0.1698035579532615 | 0.1721835568251341 | T | T | T |
| 0.5769235458534057 | 0.5556085707415908 | 0.3557845420284570 | T | T | T |
| 0.6896725210251364 | 0.5253180253652201 | 0.1997275292598804 | T | T | T |
| 0.7152431298488504 | 0.5675840606973237 | 0.9858877547187654 | T | T | T |
| 0.8745255296093902 | 0.5721103014661432 | 0.9837137052534968 | T | T | T |
| 0.8084212968446367 | 0.5516919937603384 | 0.3400950431568310 | T | T | T |

**Structure files (CONTCAR) involved in this work:**

|                    |                    |                    |   |   |   |
|--------------------|--------------------|--------------------|---|---|---|
| 0.5746650283536200 | 0.3273327727384284 | 0.3299943851989345 | T | T | T |
| 0.6951495908762889 | 0.3714094353451452 | 0.1914293554342840 | T | T | T |
| 0.7315962791541767 | 0.3267755232657062 | 0.9798548276872969 | T | T | T |
| 0.8862728728437399 | 0.3260972313121305 | 0.9979409150359346 | T | T | T |
| 0.9443549273030705 | 0.3747214012442734 | 0.1948345666477653 | T | T | T |
| 0.9206056510534855 | 0.4437736438043798 | 0.8596311529923818 | T | T | T |
| 0.8021239848331457 | 0.4717888034504427 | 0.7173816892283946 | T | T | T |
| 0.7733572834079143 | 0.4373481778059902 | 0.4929493359972159 | T | T | T |
| 0.6160650943318904 | 0.4284197256528634 | 0.4890714909655914 | T | T | T |
| 0.5688143741834547 | 0.4680358866068793 | 0.7024660035179395 | T | T | T |
| 0.6776883796212873 | 0.4475452007539319 | 0.8551028815247039 | T | T | T |
| 0.9190928818389834 | 0.6781636616109175 | 0.8244610693010360 | T | T | T |
| 0.7691787058240183 | 0.6677898091594706 | 0.4631079322243295 | T | T | T |
| 0.6144358640467941 | 0.6729520796854015 | 0.4885224588483029 | T | T | T |
| 0.5621371372694824 | 0.6264157965731258 | 0.6991551566446391 | T | T | T |
| 0.6775196876823213 | 0.6725874302812634 | 0.8224175307336806 | T | T | T |
| 0.5786267568983241 | 0.9444295783335478 | 0.3579437455569988 | T | T | T |
| 0.6994979056232062 | 0.9726972609824288 | 0.2136946556806600 | T | T | T |
| 0.7218179895147142 | 0.9355265043391890 | 0.9919956822490895 | T | T | T |
| 0.8822457930331984 | 0.9339016982100398 | 0.9948891805281136 | T | T | T |
| 0.9330989384201189 | 0.9696722907236179 | 0.2058176218490100 | T | T | T |
| 0.8235439895744370 | 0.9456276722486771 | 0.3548309237896988 | T | T | T |
| 0.5796834275941724 | 0.1724031698604778 | 0.3293908054993824 | T | T | T |
| 0.6999170309390715 | 0.1314710569493042 | 0.1928196210840747 | T | T | T |
| 0.7337421603892018 | 0.1710795390486861 | 0.9720900542777705 | T | T | T |
| 0.8884236283135734 | 0.1734555164242975 | 0.9855230276779128 | T | T | T |
| 0.9369712294019381 | 0.1275896073082219 | 0.1995026031099416 | T | T | T |
| 0.8215287705077361 | 0.1742516242832980 | 0.3301699224290947 | T | T | T |
| 0.9250584858965603 | 0.0552152244698832 | 0.8568144345130693 | T | T | T |
| 0.8047327739041139 | 0.0270285671374636 | 0.7080662603390224 | T | T | T |
| 0.7824995984148603 | 0.0666017473247189 | 0.4908715344747644 | T | T | T |
| 0.6221505153231097 | 0.0688345479225089 | 0.4902731628893359 | T | T | T |
| 0.5694001544350833 | 0.0309220122622598 | 0.6995579182178771 | T | T | T |
| 0.6809585962921303 | 0.0527157503445223 | 0.8480944261375988 | T | T | T |
| 0.9241651761850787 | 0.8301779030837716 | 0.8362228429720177 | T | T | T |
| 0.8034996379153305 | 0.8703360451912064 | 0.6957889242551808 | T | T | T |
| 0.7710217748458019 | 0.8259189306472958 | 0.4799567852693880 | T | T | T |
| 0.6160403180842660 | 0.8263696892994261 | 0.4912099040327844 | T | T | T |
| 0.5649291685803444 | 0.8737130598535936 | 0.6995259188996397 | T | T | T |
| 0.6806031816305466 | 0.8321907120758366 | 0.8313639342737403 | T | T | T |
| 0.4233354604994959 | 0.4425639088043293 | 0.6453191193750268 | T | T | T |
| 0.3032524815735201 | 0.4713939659372710 | 0.7894712946489183 | T | T | T |
| 0.2785838803484974 | 0.4379839146547524 | 0.0109310804420763 | T | T | T |
| 0.1212033802097988 | 0.4359314855634504 | 0.0136718136875218 | T | T | T |
| 0.0654868524706140 | 0.4692861899194480 | 0.7996957102080661 | T | T | T |
| 0.1774882524060535 | 0.4440888395891477 | 0.6539152040429322 | T | T | T |
| 0.4185805847550725 | 0.6719100215915736 | 0.6636005260013442 | T | T | T |
| 0.3026912339610781 | 0.6288720982139580 | 0.8057669813161243 | T | T | T |
| 0.2664674217456323 | 0.6700053152111336 | 0.0240426953117067 | T | T | T |
| 0.1125663852970147 | 0.6719255161910348 | 0.0078437701681023 | T | T | T |
| 0.0622408976591175 | 0.6282925848337058 | 0.7946716181313316 | T | T | T |
| 0.1815880489908834 | 0.6695400518773588 | 0.6685577613763324 | T | T | T |
| 0.0788963785902213 | 0.5571209853881219 | 0.1470462654914706 | T | T | T |

**Structure files (CONTCAR) involved in this work:**

|                    |                    |                    |   |   |   |
|--------------------|--------------------|--------------------|---|---|---|
| 0.1985459018674547 | 0.5244763661028514 | 0.2886187210636523 | T | T | T |
| 0.2170667787306266 | 0.5606282182244962 | 0.5120461217044870 | T | T | T |
| 0.3760893583971349 | 0.5646797523048126 | 0.5117914438308102 | T | T | T |
| 0.4296374261043072 | 0.5282700868386250 | 0.3005156512425827 | T | T | T |
| 0.3226550454522644 | 0.5532402027596576 | 0.1511101132919148 | T | T | T |
| 0.0864914870649628 | 0.3229414881623498 | 0.1602505389722406 | T | T | T |
| 0.1977018604528348 | 0.3670453534099783 | 0.3069398124007651 | T | T | T |
| 0.2330739399340706 | 0.3282980194079592 | 0.5248354423713897 | T | T | T |
| 0.3873454911750470 | 0.3267784523071613 | 0.5062533072904376 | T | T | T |
| 0.4337479166522809 | 0.3705742593627650 | 0.2920930485547295 | T | T | T |
| 0.3156308628766248 | 0.3283068788148387 | 0.1686122531155160 | T | T | T |
| 0.3588368307735367 | 0.0613250797994969 | 0.7183614192731463 | T | T | T |
| 0.3060589251027263 | 0.0663240890883833 | 0.8977128040785491 | T | T | T |
| 0.2030630479773934 | 0.0458371700750416 | 0.0210410834859404 | T | T | T |
| 0.1014036053647946 | 0.0686766096334669 | 0.8956726203587669 | T | T | T |
| 0.1049262881502360 | 0.0576825164587069 | 0.6984613833055254 | T | T | T |
| 0.2304971241001771 | 0.0312191030999699 | 0.7439855181776790 | T | T | T |
| 0.3603192964511815 | 0.8267983638975244 | 0.7475270572838967 | T | T | T |
| 0.3053983387939628 | 0.8407345386132198 | 0.9229793883550984 | T | T | T |
| 0.1891394497029302 | 0.8513498160352080 | 0.0164365600272497 | T | T | T |
| 0.0846696762543706 | 0.8304848070869518 | 0.8997576531834025 | T | T | T |
| 0.1058980189353220 | 0.8394311572952950 | 0.7045226572854953 | T | T | T |
| 0.2310632912751242 | 0.8558517669312840 | 0.7607651891055406 | T | T | T |
| 0.3233400128410790 | 0.9476622608177182 | 0.8075933217758769 | T | T | T |
| 0.0881597150567590 | 0.9498130381335705 | 0.8133093266120203 | T | T | T |
| 0.4323053888581683 | 0.1270503883852569 | 0.5862571133366625 | T | T | T |
| 0.4187496232661743 | 0.9953765364936153 | 0.5679058829569896 | T | T | T |
| 0.3982153418148704 | 0.8632592643922907 | 0.5649289388982753 | T | T | T |
| 0.2003268577961409 | 0.1294164393583511 | 0.6168909954432863 | T | T | T |
| 0.1828038034261044 | 0.0013886966618708 | 0.5630493384140001 | T | T | T |
| 0.1983436471540681 | 0.8673220700713576 | 0.5675267187481469 | T | T | T |
| 0.9909896102509591 | 0.0409672489194301 | 0.7896508654759281 | T | T | T |
| 0.9861736653415192 | 0.8674390097199697 | 0.7790328618142710 | T | T | T |
| 0.1434596581772143 | 0.9367836466637306 | 0.2175462486447146 | T | T | T |
| 0.1969031441803591 | 0.9317726828848006 | 0.3969112088575189 | T | T | T |
| 0.2997698713667637 | 0.9483055509037226 | 0.5223838183898590 | T | T | T |
| 0.4017704914713589 | 0.9297144569711413 | 0.3971121143277596 | T | T | T |
| 0.3975870771274042 | 0.9392589720949045 | 0.2001027897455680 | T | T | T |
| 0.2717366165372166 | 0.9670721767910738 | 0.2428016425311313 | T | T | T |
| 0.1420677861769255 | 0.1711806670273222 | 0.2464417941921552 | T | T | T |
| 0.1938301113398654 | 0.1569580624377598 | 0.4233218244702076 | T | T | T |
| 0.3113452403598854 | 0.1471775834607519 | 0.5121234290099328 | T | T | T |
| 0.4173634291463690 | 0.1678487239754063 | 0.3979333277416058 | T | T | T |
| 0.3957198874035635 | 0.1583016250988928 | 0.2034765995602707 | T | T | T |
| 0.2712381519758617 | 0.1425506538961512 | 0.2635805502961003 | T | T | T |
| 0.1785242255857276 | 0.0502637180923457 | 0.3068866547285358 | T | T | T |
| 0.4171394792939445 | 0.0480826900217871 | 0.3118951354118268 | T | T | T |
| 0.0674610733028018 | 0.8701582897133573 | 0.0895852274124609 | T | T | T |
| 0.0831591102825490 | 0.0001434389476755 | 0.0641658817394724 | T | T | T |
| 0.1056045335737365 | 0.1314038912578392 | 0.0652689532141793 | T | T | T |
| 0.3021709442336099 | 0.8682826921343930 | 0.1167217475317466 | T | T | T |
| 0.3214030395287491 | 0.9960918655387271 | 0.0629760789021784 | T | T | T |
| 0.3014829946028754 | 0.1295462573047015 | 0.0696503436383202 | T | T | T |



**Structure files (CONTCAR) involved in this work:**

|                    |                    |                    |   |   |   |
|--------------------|--------------------|--------------------|---|---|---|
| 0.5121960134506788 | 0.9543565426671810 | 0.2900830536378308 | T | T | T |
| 0.5167569634651065 | 0.1332914376291987 | 0.2776270633698061 | T | T | T |
| 0.6380435063633750 | 0.5596148142116792 | 0.2774628787793539 | T | T | T |
| 0.6949820596872202 | 0.5742227059780651 | 0.1032430624152150 | T | T | T |
| 0.7949432778627513 | 0.5557324319622082 | 0.9715689993701329 | T | T | T |
| 0.8956445344890799 | 0.5803987487204062 | 0.0989529197208872 | T | T | T |
| 0.8856156405060892 | 0.5402095007127320 | 0.3112846320779514 | T | T | T |
| 0.7627010748493529 | 0.5212264651431335 | 0.2528088642710415 | T | T | T |
| 0.6424645787533800 | 0.3345533404987034 | 0.2662796317906608 | T | T | T |
| 0.6905181126510408 | 0.3331642236303941 | 0.0837634684437242 | T | T | T |
| 0.8087601345602863 | 0.3504916534727283 | 0.9968577289989111 | T | T | T |
| 0.9133045026954002 | 0.3224519842591971 | 0.1131083887373101 | T | T | T |
| 0.9090960774000997 | 0.3615346592711781 | 0.3049218372204450 | T | T | T |
| 0.7692088371004747 | 0.3686883495911621 | 0.2367404300411254 | T | T | T |
| 0.6687806307883143 | 0.4487411849894575 | 0.1731060518040568 | T | T | T |
| 0.9330886301352721 | 0.4497533119312396 | 0.1568605602531488 | T | T | T |
| 0.5703532402464553 | 0.6271335320782753 | 0.4129643866776797 | T | T | T |
| 0.5885164262360909 | 0.4972887779819159 | 0.4389667641543379 | T | T | T |
| 0.5808262947652091 | 0.3635923072519076 | 0.4388492963486342 | T | T | T |
| 0.7931792041291710 | 0.6309962546509980 | 0.3603450174348386 | T | T | T |
| 0.7912341936011638 | 0.5144495681075669 | 0.4499204741457651 | T | T | T |
| 0.8225817968807789 | 0.3863542820757409 | 0.4358896724727964 | T | T | T |
| 0.0125139958249155 | 0.5567507922892346 | 0.2274640421128733 | T | T | T |
| 0.0237867211854198 | 0.3607136868163411 | 0.2114304431578341 | T | T | T |
| 0.8564314971516251 | 0.4325468320864667 | 0.7859343831753124 | T | T | T |
| 0.7894844061186869 | 0.4336883618989983 | 0.6112183375855095 | T | T | T |
| 0.6960198901759916 | 0.4224101224670870 | 0.4691072121554904 | T | T | T |
| 0.6005729478799816 | 0.4281410716636995 | 0.6075087982513124 | T | T | T |
| 0.6044011979955565 | 0.4416682934728860 | 0.8038428389603420 | T | T | T |
| 0.7307029251100687 | 0.4760088149893494 | 0.7729631782931796 | T | T | T |
| 0.8614927829652170 | 0.6829566212538143 | 0.7425382625924579 | T | T | T |
| 0.8173899987152897 | 0.6393221433916261 | 0.5538684154193682 | T | T | T |
| 0.6921388141997552 | 0.6477449742368708 | 0.4888351294435425 | T | T | T |
| 0.5842141880863286 | 0.6677681377052733 | 0.6000041867147659 | T | T | T |
| 0.5984535686353867 | 0.6592737231640203 | 0.7959510760364289 | T | T | T |
| 0.7228951379595756 | 0.6454958772167686 | 0.7313543103912271 | T | T | T |
| 0.8296653735726528 | 0.5472191184312363 | 0.6899021562001404 | T | T | T |
| 0.5821050404917413 | 0.5477699646095343 | 0.6862796498246984 | T | T | T |
| 0.9300682597469137 | 0.3778798314369868 | 0.9305465506948553 | T | T | T |
| 0.9138616406684049 | 0.5101832254450086 | 0.9287174212028834 | T | T | T |
| 0.8939647557328335 | 0.6409627685273992 | 0.9257859273697143 | T | T | T |
| 0.6987245284874362 | 0.3734986610780679 | 0.8936531990220153 | T | T | T |
| 0.6749605401464731 | 0.5017296837249132 | 0.9453705832369235 | T | T | T |
| 0.6931171113245793 | 0.6354081093329274 | 0.9284119067580333 | T | T | T |
| 0.4894732717607970 | 0.4521373471689057 | 0.7135384518191571 | T | T | T |
| 0.4814061657283695 | 0.6320272434662009 | 0.7125030894646754 | T | T | T |
| 0.6432096504362372 | 0.9396998218319152 | 0.2855626420966608 | T | T | T |
| 0.7000227968603616 | 0.9322106594518301 | 0.1085219991478623 | T | T | T |
| 0.8023294732857164 | 0.9427750542358215 | 0.9802002713619012 | T | T | T |
| 0.9014344600369351 | 0.9284173204069899 | 0.1122684015282754 | T | T | T |
| 0.8988451218968401 | 0.9458330766266723 | 0.3097180199808519 | T | T | T |
| 0.7723081628453250 | 0.9651410362662024 | 0.2654252052160262 | T | T | T |
| 0.6424547487925446 | 0.1716221042516780 | 0.2535459461628811 | T | T | T |

**Structure files (CONTCAR) involved in this work:**

|                    |                    |                    |   |   |   |
|--------------------|--------------------|--------------------|---|---|---|
| 0.6974287268643521 | 0.1577970736332697 | 0.0784434484978061 | T | T | T |
| 0.8114483010218919 | 0.1471729187620774 | 0.9800329988712980 | T | T | T |
| 0.9154326443164224 | 0.1676750346650448 | 0.0991349749178947 | T | T | T |
| 0.8984359424560924 | 0.1572549047198671 | 0.2962993024361644 | T | T | T |
| 0.7728483242513988 | 0.1454368495985527 | 0.2411678161593823 | T | T | T |
| 0.6829306675377013 | 0.0515584773862596 | 0.1958989245008298 | T | T | T |
| 0.9193968969159159 | 0.0486950838988280 | 0.1851534223585320 | T | T | T |
| 0.5712145051403841 | 0.8748020494935762 | 0.4206048813574277 | T | T | T |
| 0.5841212131728779 | 0.0062697881198207 | 0.4367863545737251 | T | T | T |
| 0.6001287311409657 | 0.1381577265758770 | 0.4354546911421782 | T | T | T |
| 0.8092485231638928 | 0.8704637779936263 | 0.3966831856913191 | T | T | T |
| 0.8182071864783301 | 0.9999676558759136 | 0.4447571318525389 | T | T | T |
| 0.8057409035057373 | 0.1341216517760101 | 0.4338348711427615 | T | T | T |
| 0.0125793882505951 | 0.9546853606841208 | 0.2175517709517484 | T | T | T |
| 0.0171116376811247 | 0.1361935815889971 | 0.2164426323447409 | T | T | T |
| 0.8602813250190138 | 0.0561100945408443 | 0.7845550173645039 | T | T | T |
| 0.8045856536200203 | 0.0726652023684357 | 0.6074736123396837 | T | T | T |
| 0.7020040649234894 | 0.0570930881552781 | 0.4808800922467567 | T | T | T |
| 0.5998373896695196 | 0.0740539662434705 | 0.6066824766678087 | T | T | T |
| 0.6055367576285747 | 0.0512895474583056 | 0.8036487568336160 | T | T | T |
| 0.7313992319956687 | 0.0301002129240906 | 0.7592627768546674 | T | T | T |
| 0.8583922382941983 | 0.8357046362509828 | 0.7671072620478997 | T | T | T |
| 0.8064156489968302 | 0.8327160594267262 | 0.5883921149720455 | T | T | T |
| 0.6936959988767104 | 0.8508842696306955 | 0.4873124422525489 | T | T | T |
| 0.5893053655793659 | 0.8281486475113449 | 0.6055470601915564 | T | T | T |
| 0.6039444490544157 | 0.8506151097865531 | 0.8002509714723754 | T | T | T |
| 0.7295305849214914 | 0.8623728446010438 | 0.7445870701718099 | T | T | T |
| 0.8211344203729398 | 0.9493101050066421 | 0.6800275940768108 | T | T | T |
| 0.5807735615161500 | 0.9518252716919927 | 0.6741901951332320 | T | T | T |
| 0.9335182601309315 | 0.1280794937971468 | 0.9104107499390390 | T | T | T |
| 0.9189700429031039 | 0.9982026318697593 | 0.9435924274424562 | T | T | T |
| 0.9090910477016374 | 0.8653001039748797 | 0.9434543247356968 | T | T | T |
| 0.6969275494704823 | 0.1285784253668154 | 0.8847969005555620 | T | T | T |
| 0.6867007943043401 | 0.0010127942221713 | 0.9416682214657679 | T | T | T |
| 0.6974535059483392 | 0.8665830506651061 | 0.9385599741118321 | T | T | T |
| 0.4903986809135075 | 0.0464907942539964 | 0.7155245760521136 | T | T | T |
| 0.4852100540701371 | 0.8632993209026594 | 0.7171934545871682 | T | T | T |
| 0.3581667679650800 | 0.4361819195627948 | 0.7173064987525027 | T | T | T |
| 0.3004841164961355 | 0.4307057733709400 | 0.8947775244301379 | T | T | T |
| 0.1994789083725390 | 0.4575889192951794 | 0.0213724266394514 | T | T | T |
| 0.0967794006900388 | 0.4344327316882995 | 0.8992123694996976 | T | T | T |
| 0.1029028215450169 | 0.4398432476960524 | 0.7010083949816655 | T | T | T |
| 0.2295378913251810 | 0.4688756000472811 | 0.7391890842525328 | T | T | T |
| 0.3569371091747697 | 0.6706857789870848 | 0.7420005611132410 | T | T | T |
| 0.3041158483876805 | 0.6582704233415404 | 0.9184773630983369 | T | T | T |
| 0.1892122548748971 | 0.6449636411889322 | 0.0130560385491265 | T | T | T |
| 0.0853036021763131 | 0.6684578692865818 | 0.8947917890554774 | T | T | T |
| 0.1038168315439251 | 0.6582285300235031 | 0.6997683580947726 | T | T | T |
| 0.2286880213671876 | 0.6385397122535804 | 0.7568735622084619 | T | T | T |
| 0.3228056899676609 | 0.5497358462034825 | 0.8076428811702874 | T | T | T |
| 0.0797729725841772 | 0.5493177303118005 | 0.8085670866199717 | T | T | T |
| 0.4315376139819262 | 0.3748963539334603 | 0.5783963369018311 | T | T | T |
| 0.4173241682806799 | 0.5061660523682062 | 0.5693146485024148 | T | T | T |

**Structure files (CONTCAR) involved in this work:**

|                    |                    |                    |   |   |   |
|--------------------|--------------------|--------------------|---|---|---|
| 0.3945495164613282 | 0.6372918278045197 | 0.5593051695440776 | T | T | T |
| 0.1978102357743265 | 0.3700960136853815 | 0.6141163522841480 | T | T | T |
| 0.1770956099425413 | 0.4977347234927788 | 0.5616867625072206 | T | T | T |
| 0.1956302252272497 | 0.6314278855528819 | 0.5628651004689814 | T | T | T |
| 0.9868774174841204 | 0.4518346371300205 | 0.7899800415112612 | T | T | T |
| 0.9831861954328207 | 0.6378619939085820 | 0.7759824577487476 | T | T | T |
| 0.1446731634659853 | 0.5623247964880835 | 0.2162485385779278 | T | T | T |
| 0.1962619799052367 | 0.5639576962459979 | 0.3945236642313073 | T | T | T |
| 0.2967943913124750 | 0.5484335546033658 | 0.5245982521899242 | T | T | T |
| 0.3960369044075322 | 0.5671471725445359 | 0.3947418720347537 | T | T | T |
| 0.3972307544471279 | 0.5567508835456282 | 0.1975230974331939 | T | T | T |
| 0.2719684469186906 | 0.5289002952565706 | 0.2395627078272699 | T | T | T |
| 0.1467480350661080 | 0.3225890773638069 | 0.2410765964136546 | T | T | T |
| 0.1924360667879520 | 0.3420145964041022 | 0.4215842362727430 | T | T | T |
| 0.3099902323267141 | 0.3527793223056537 | 0.5102571659312691 | T | T | T |
| 0.4134351251732372 | 0.3281978691445939 | 0.3915246097072973 | T | T | T |
| 0.3936765896833906 | 0.3425421393809525 | 0.1945890733540797 | T | T | T |
| 0.2728539597084864 | 0.3565011872284533 | 0.2640389663099663 | T | T | T |
| 0.1764351299748750 | 0.4463209248048084 | 0.3009342696761010 | T | T | T |
| 0.4143848148343393 | 0.4485874754781052 | 0.3123056885738910 | T | T | T |
| 0.0679976390166946 | 0.6239491593447775 | 0.0811494051004964 | T | T | T |
| 0.0771959924444731 | 0.4901664432459944 | 0.0795498957185249 | T | T | T |
| 0.1102901567233170 | 0.3614937704673441 | 0.0592125215875705 | T | T | T |
| 0.3021623860157046 | 0.6272695205405130 | 0.1119248417343379 | T | T | T |
| 0.3212427098131332 | 0.4990638683716562 | 0.0602979396437296 | T | T | T |
| 0.2932713762908566 | 0.3671633893805493 | 0.0670339883138789 | T | T | T |
| 0.5090271607560883 | 0.5414896458601314 | 0.2938707059811834 | T | T | T |
| 0.5129018622643546 | 0.3620110575387265 | 0.2690813614777980 | T | T | T |
| 0.4389890442840181 | 0.7489645205610646 | 0.6397137254061787 | T | T | T |
| 0.1971924052098876 | 0.7486028634262367 | 0.6520584923239727 | T | T | T |
| 0.2697246374849742 | 0.7482198213718370 | 0.0559269112100003 | T | T | T |
| 0.1069355374360114 | 0.7478523466198010 | 0.0499682720905112 | T | T | T |
| 0.0663967929930719 | 0.2469741364866933 | 0.1309010573244294 | T | T | T |
| 0.3029253471960597 | 0.2488067277459161 | 0.1516813730925849 | T | T | T |
| 0.2297932092490347 | 0.2497795058054593 | 0.5547987300325216 | T | T | T |
| 0.3929263730362276 | 0.2504330237713955 | 0.5476951172944926 | T | T | T |
| 0.5579251527060893 | 0.2492051647106943 | 0.3518037890779712 | T | T | T |
| 0.8124632209632423 | 0.2528518982248818 | 0.3476983397830347 | T | T | T |
| 0.7288528911363272 | 0.2496308045456991 | 0.9409334081587154 | T | T | T |
| 0.8934600871473286 | 0.2513431097739035 | 0.9501385668175758 | T | T | T |
| 0.9443004236185796 | 0.7528635736290287 | 0.8572939592154107 | T | T | T |
| 0.6897413832393838 | 0.7521830206442298 | 0.8422128368323171 | T | T | T |
| 0.7761601435586157 | 0.7477820418286829 | 0.4461931507544414 | T | T | T |
| 0.6100705239273969 | 0.7500109968674963 | 0.4497601681995970 | T | T | T |
| 0.9343472116209823 | 0.4809278221346861 | 0.5263576450475170 | T | T | T |
| 0.8228557366918957 | 0.3367406322510373 | 0.3257041530683453 | T | T | T |
| 0.8024917635082743 | 0.6333659367939122 | 0.6872674698907683 | T | T | T |
| 0.9232538756276466 | 0.5307670373297919 | 0.1946379902175966 | T | T | T |
| 0.9241643662429450 | 0.4214627857699433 | 0.4245690418055668 | T | T | T |
| 0.8733827138271686 | 0.5494008650253986 | 0.5482828269177752 | T | T | T |
| 0.9849294971537407 | 0.6457983600666114 | 0.3021359439793682 | T | T | T |
| 0.9996705241676518 | 0.5732733875181666 | 0.3804297875933176 | T | T | T |
| 0.0370033497560648 | 0.4374669151061632 | 0.5010339414372891 | T | T | T |

**Structure files (CONTCAR) involved in this work:**

|                    |                    |                    |   |   |   |
|--------------------|--------------------|--------------------|---|---|---|
| 0.0690241976321609 | 0.6176498608102996 | 0.3254557727848592 | T | T | T |
| 0.0397422899630601 | 0.4405860107380087 | 0.3633516602186982 | T | T | T |
| 0.0236660206400656 | 0.3605913167440735 | 0.4262767495818388 | T | T | T |
| 0.0170131452927746 | 0.6020703028973294 | 0.3156190684314429 | T | T | T |
| 0.0207043594439928 | 0.4156593218390460 | 0.4304129741311969 | T | T | T |

**Figure S17 ZnCu-TS**

Si O Al Cu Zn H C

1.0000000000000000

20.0219999999999985 0.0000000000000000 0.0000000000000000

0.0000000000000000 19.8990000000000009 0.0000000000000000

0.0000000000000000 0.0000000000000000 13.3829999999999991

93 193 3 1 1 6 2

Selective dynamics

Direct

|                    |                    |                    |   |   |   |
|--------------------|--------------------|--------------------|---|---|---|
| 0.4245306714235336 | 0.0561796539131097 | 0.6474713263052696 | T | T | T |
| 0.3036195959350728 | 0.0254364867085614 | 0.7904457667012670 | T | T | T |
| 0.2827047712085147 | 0.0599753781733224 | 0.0124021035766964 | T | T | T |
| 0.1234923930142578 | 0.0618804070296554 | 0.0115710442598857 | T | T | T |
| 0.0714726106630435 | 0.0282408881377683 | 0.8000703563690941 | T | T | T |
| 0.1793814386924507 | 0.0539175608710042 | 0.6514305717564277 | T | T | T |
| 0.4211306449507701 | 0.8264115454207602 | 0.6673102218634621 | T | T | T |
| 0.3040158026881173 | 0.8673902172148482 | 0.8091499845103561 | T | T | T |
| 0.2663166076833802 | 0.8263124917453238 | 0.0272398105059460 | T | T | T |
| 0.1117208553518240 | 0.8244165847561856 | 0.0130477859698256 | T | T | T |
| 0.0661065233745266 | 0.8711111748426956 | 0.7988976649632070 | T | T | T |
| 0.1828482600658086 | 0.8273430333712670 | 0.6699284930716082 | T | T | T |
| 0.0772933965018379 | 0.9411453774214048 | 0.1469544565820074 | T | T | T |
| 0.1978900684084232 | 0.9716437061452861 | 0.2895587267940714 | T | T | T |
| 0.2192962426200787 | 0.9364565488347911 | 0.5113511261690145 | T | T | T |
| 0.3787243233810079 | 0.9343696972201181 | 0.5127428970942803 | T | T | T |
| 0.4318811006206693 | 0.9680601674804838 | 0.3004851613579598 | T | T | T |
| 0.3225171417242613 | 0.9430172900933231 | 0.1527193674268831 | T | T | T |
| 0.0818188503012712 | 0.1715967429410152 | 0.1639032831400677 | T | T | T |
| 0.1976008383726250 | 0.1291897910699381 | 0.3072099963318274 | T | T | T |
| 0.2339502011097606 | 0.1707428468771716 | 0.5246054028025943 | T | T | T |
| 0.3885881086351963 | 0.1726076729558921 | 0.5116504771568131 | T | T | T |
| 0.4373994171511616 | 0.1262831256535977 | 0.2987889323810632 | T | T | T |
| 0.3193207543196026 | 0.1687735820017734 | 0.1711256771961533 | T | T | T |
| 0.5767447901746778 | 0.5555366676051003 | 0.3569970072334434 | T | T | T |
| 0.6894642285875227 | 0.5246590040321206 | 0.2003997585159663 | T | T | T |
| 0.7160573980866827 | 0.5673763279353901 | 0.9863991421541257 | T | T | T |
| 0.8748990486879428 | 0.5718433385265450 | 0.9864430170092955 | T | T | T |
| 0.8084717486571207 | 0.5525591564334914 | 0.3404496525408289 | T | T | T |
| 0.5747657916408692 | 0.3271008113041152 | 0.3308112255539340 | T | T | T |
| 0.6950727792506357 | 0.3706763509788246 | 0.1913835966259904 | T | T | T |
| 0.7307607303891992 | 0.3262883433993536 | 0.9793442620581221 | T | T | T |
| 0.8851687508039349 | 0.3257161729999556 | 0.9981713505104691 | T | T | T |
| 0.9416724851494016 | 0.3760930710390356 | 0.1922568517695503 | T | T | T |
| 0.9218687961182317 | 0.4438282954228494 | 0.8623268721312901 | T | T | T |
| 0.8034076434403368 | 0.4710499251520952 | 0.7184869886083206 | T | T | T |
| 0.7741471971064483 | 0.4374655169983177 | 0.4934428981311166 | T | T | T |
| 0.6164001436198560 | 0.4282479866358497 | 0.4903661529028320 | T | T | T |
| 0.5683933205505125 | 0.4686673548762235 | 0.7029025813064590 | T | T | T |

**Structure files (CONTCAR) involved in this work:**

|                    |                    |                    |   |   |   |
|--------------------|--------------------|--------------------|---|---|---|
| 0.6776964150167257 | 0.4473739772445838 | 0.8547424801819744 | T | T | T |
| 0.9194227185329995 | 0.6775900853004480 | 0.8263596802749147 | T | T | T |
| 0.7689230208848673 | 0.6680071564493955 | 0.4647362172863763 | T | T | T |
| 0.6146688214802934 | 0.6732545395373836 | 0.4902597611361055 | T | T | T |
| 0.5620925692161672 | 0.6269835482700661 | 0.7004373699993092 | T | T | T |
| 0.6784544690895070 | 0.6720521881356859 | 0.8234399659729571 | T | T | T |
| 0.5780942270863246 | 0.9444401581664643 | 0.3588192773622940 | T | T | T |
| 0.6998868531525370 | 0.9723124924384493 | 0.2152740660357112 | T | T | T |
| 0.7217535372023369 | 0.9342714269433077 | 0.9935182471628702 | T | T | T |
| 0.8822322955325140 | 0.9335868490125460 | 0.9959649452969205 | T | T | T |
| 0.9333049775063006 | 0.9698913590239953 | 0.2067427100411433 | T | T | T |
| 0.8243204215905701 | 0.9453568513053074 | 0.3570737358244721 | T | T | T |
| 0.5802128815410411 | 0.1720209332401692 | 0.3311573421926793 | T | T | T |
| 0.7005044155698843 | 0.1312387002450129 | 0.1939806312707051 | T | T | T |
| 0.7335646020008725 | 0.1707188042941130 | 0.9730262852053085 | T | T | T |
| 0.8881962401530078 | 0.1732626517932811 | 0.9865134765548372 | T | T | T |
| 0.9372066731202269 | 0.1281652588006439 | 0.2007204944923167 | T | T | T |
| 0.8217639271610747 | 0.1740250185574980 | 0.3319605850590298 | T | T | T |
| 0.9253725008085051 | 0.0552859781187594 | 0.8582311121220751 | T | T | T |
| 0.8050248882241365 | 0.0270140994091537 | 0.7097706626068947 | T | T | T |
| 0.7825700294279329 | 0.0660107874681394 | 0.4922338681045503 | T | T | T |
| 0.6224670305157577 | 0.0683943910120120 | 0.4912044737139519 | T | T | T |
| 0.5699681433926347 | 0.0300017096346511 | 0.7003611967907578 | T | T | T |
| 0.6808604729340002 | 0.0517059342435067 | 0.8500687625820968 | T | T | T |
| 0.9244968651713108 | 0.8298420840847596 | 0.8377638917547534 | T | T | T |
| 0.8034950763660424 | 0.8705729182688331 | 0.6984143769485636 | T | T | T |
| 0.7714956150066603 | 0.8260804884728106 | 0.4821367547963689 | T | T | T |
| 0.6166736468159558 | 0.8264724075906933 | 0.4918783786803902 | T | T | T |
| 0.5654656983529319 | 0.8729466395978761 | 0.7003319952609218 | T | T | T |
| 0.6805803096340044 | 0.8316648787139359 | 0.8327912766189954 | T | T | T |
| 0.4237580444760323 | 0.4428518378887665 | 0.6438694914883548 | T | T | T |
| 0.3035877876567758 | 0.4715329169676212 | 0.7882326449594170 | T | T | T |
| 0.2816482591406203 | 0.4365809613287523 | 0.0086425522766609 | T | T | T |
| 0.1243079834473655 | 0.4365244691330461 | 0.0133757311612624 | T | T | T |
| 0.0669771575008908 | 0.4689154639141366 | 0.8006810515983740 | T | T | T |
| 0.1777222835864077 | 0.4438197309673270 | 0.6535875163047938 | T | T | T |
| 0.4191463854736153 | 0.6722417733978647 | 0.6637827146576133 | T | T | T |
| 0.3021658983347553 | 0.6289853893405781 | 0.8044231124834234 | T | T | T |
| 0.2661317329799644 | 0.6696177302924008 | 0.0233291760507735 | T | T | T |
| 0.1118236052574096 | 0.6703296961229567 | 0.0111622579948316 | T | T | T |
| 0.0626166499127747 | 0.6279950800382909 | 0.7967138008129742 | T | T | T |
| 0.1805938657096836 | 0.6691044775250355 | 0.6673988750562174 | T | T | T |
| 0.0755036933211058 | 0.5558016329791156 | 0.1525614804301196 | T | T | T |
| 0.1988099670452037 | 0.5247171613422792 | 0.2869581824264201 | T | T | T |
| 0.2181685482940133 | 0.5603148047942200 | 0.5125335419861898 | T | T | T |
| 0.3765678920288691 | 0.5650677794233689 | 0.5125046423981690 | T | T | T |
| 0.4283868235791739 | 0.5280167946732404 | 0.3016462882297971 | T | T | T |
| 0.3236084879972850 | 0.5520566823127967 | 0.1483708264154459 | T | T | T |
| 0.0855442519903526 | 0.3249123330739654 | 0.1586886098882044 | T | T | T |
| 0.1968268804503134 | 0.3671383082894067 | 0.3068368534595324 | T | T | T |
| 0.2333822417641044 | 0.3279680690088370 | 0.5251313544481890 | T | T | T |
| 0.3875913263206782 | 0.3263704682181339 | 0.5071242462181662 | T | T | T |
| 0.4334994826523205 | 0.3701698388599126 | 0.2931270349584172 | T | T | T |

**Structure files (CONTCAR) involved in this work:**

|                    |                    |                    |   |   |   |
|--------------------|--------------------|--------------------|---|---|---|
| 0.3158405181081548 | 0.3272926119069233 | 0.1673980983370361 | T | T | T |
| 0.3593251156728338 | 0.0595229010207881 | 0.7189277617513135 | T | T | T |
| 0.3023306369527901 | 0.0663872323638984 | 0.8952824657879845 | T | T | T |
| 0.2028322076705685 | 0.0480742032354019 | 0.0261456558608710 | T | T | T |
| 0.1040494406306531 | 0.0676150820798054 | 0.8945929480034648 | T | T | T |
| 0.1044378472299342 | 0.0564376309445869 | 0.6974326828934745 | T | T | T |
| 0.2305877306906813 | 0.0295555627849550 | 0.7384249643538084 | T | T | T |
| 0.3605206237535432 | 0.8270784501359632 | 0.7473290690155510 | T | T | T |
| 0.3046631274977340 | 0.8389227145347287 | 0.9222649528039976 | T | T | T |
| 0.1889336539628096 | 0.8504280539276976 | 0.0165651084369820 | T | T | T |
| 0.0848757578407144 | 0.8292920760594188 | 0.8992054239266472 | T | T | T |
| 0.1055319195954305 | 0.8387975755164108 | 0.7037229689736846 | T | T | T |
| 0.2309021240548836 | 0.8547992787782537 | 0.7592363998046493 | T | T | T |
| 0.3218023367296103 | 0.9469454755361633 | 0.8094637806276715 | T | T | T |
| 0.0883844536064261 | 0.9488409090337400 | 0.8133352271297698 | T | T | T |
| 0.4321578328814945 | 0.1268720645116114 | 0.5877024246746069 | T | T | T |
| 0.4188017038303163 | 0.9954600136440893 | 0.5664119066711505 | T | T | T |
| 0.3982498160960690 | 0.8634213719115745 | 0.5647096609416921 | T | T | T |
| 0.1984761883626443 | 0.1287012427351777 | 0.6132855829513743 | T | T | T |
| 0.1807466983777163 | 0.0009245534129445 | 0.5588726903865182 | T | T | T |
| 0.1975423291572350 | 0.8670292496384787 | 0.5662756647036922 | T | T | T |
| 0.9916985388408935 | 0.0406628717697087 | 0.7922618358264931 | T | T | T |
| 0.9861154461303373 | 0.8666675077488530 | 0.7789566868647538 | T | T | T |
| 0.1435478318404370 | 0.9368030110128510 | 0.2164153267101968 | T | T | T |
| 0.1988000117909517 | 0.9305628152941117 | 0.3944350924249516 | T | T | T |
| 0.2991636219518516 | 0.9483640189791172 | 0.5243084189123046 | T | T | T |
| 0.3996858199879207 | 0.9294362505473056 | 0.3962141985675269 | T | T | T |
| 0.3973924176781273 | 0.9400366961985843 | 0.1988804690991510 | T | T | T |
| 0.2716107345851190 | 0.9685557689318723 | 0.2395247312874970 | T | T | T |
| 0.1435019759252546 | 0.1706220063657299 | 0.2422143073790097 | T | T | T |
| 0.1949893813479546 | 0.1584808982050663 | 0.4199973154654698 | T | T | T |
| 0.3112706229827408 | 0.1467608122337310 | 0.5128224990986802 | T | T | T |
| 0.4175666048448187 | 0.1675579973396811 | 0.3991023240583029 | T | T | T |
| 0.3969714887365186 | 0.1583439933569193 | 0.2042938210866598 | T | T | T |
| 0.2720438183705043 | 0.1399695692143790 | 0.2607869961711855 | T | T | T |
| 0.1781656343585208 | 0.0499432698115966 | 0.3079108008122161 | T | T | T |
| 0.4170660822065561 | 0.0479723932129271 | 0.3127301148467510 | T | T | T |
| 0.0673715801311263 | 0.8703172205229546 | 0.0881741759142825 | T | T | T |
| 0.0828454702208991 | 0.0007307936354199 | 0.0640459457505846 | T | T | T |
| 0.1026167221720442 | 0.1325186954568424 | 0.0624685039435148 | T | T | T |
| 0.3023674066945078 | 0.8682342958366411 | 0.1156410470587724 | T | T | T |
| 0.3215058788661790 | 0.9954438947280345 | 0.0593905309198981 | T | T | T |
| 0.3047124007893217 | 0.1291326181858814 | 0.0674714670234533 | T | T | T |
| 0.5113154582017937 | 0.9535090149698452 | 0.2915694840405413 | T | T | T |
| 0.5173750823615394 | 0.1326578030404163 | 0.2797163982559808 | T | T | T |
| 0.6363862756305801 | 0.5587613011044029 | 0.2761310481606082 | T | T | T |
| 0.6957458138492286 | 0.5733066237325000 | 0.1038075370337881 | T | T | T |
| 0.7954448745123931 | 0.5550261966077503 | 0.9709391465343052 | T | T | T |
| 0.8944901142852127 | 0.5807013108480671 | 0.1015443167521782 | T | T | T |
| 0.8855522489261300 | 0.5420156517534630 | 0.3134228111411365 | T | T | T |
| 0.7614360895913480 | 0.5203988865605546 | 0.2563738463478045 | T | T | T |
| 0.6424113882576266 | 0.3342219783140274 | 0.2667415256094423 | T | T | T |
| 0.6902088436580669 | 0.3323651877529639 | 0.0837736482896918 | T | T | T |

**Structure files (CONTCAR) involved in this work:**

|                    |                    |                    |   |   |   |
|--------------------|--------------------|--------------------|---|---|---|
| 0.8078425440962768 | 0.3505024700287590 | 0.9948734437450070 | T | T | T |
| 0.9107269245005447 | 0.3214067199341090 | 0.1140062506321202 | T | T | T |
| 0.9100033030213602 | 0.3595848329440457 | 0.3052338818186765 | T | T | T |
| 0.7690837219039899 | 0.3673000109466875 | 0.2370077196875751 | T | T | T |
| 0.6691495324695349 | 0.4480383143032907 | 0.1730079220788602 | T | T | T |
| 0.9229372854435770 | 0.4499329605570712 | 0.1583608994609947 | T | T | T |
| 0.5714163490234977 | 0.6270688094664334 | 0.4142397505694883 | T | T | T |
| 0.5898859036435776 | 0.4972204862420644 | 0.4398178863405529 | T | T | T |
| 0.5816158267049156 | 0.3634360906946579 | 0.4396910108757853 | T | T | T |
| 0.7911360783597575 | 0.6313394624147959 | 0.3611931395915257 | T | T | T |
| 0.7921948964202128 | 0.5148692335932058 | 0.4520353453789566 | T | T | T |
| 0.8239804710888503 | 0.3879842873522091 | 0.4341761547773310 | T | T | T |
| 0.0118084835287634 | 0.5496003172081464 | 0.2271122319411485 | T | T | T |
| 0.0219103273213453 | 0.3649489877254935 | 0.2035120844000769 | T | T | T |
| 0.8580013488120692 | 0.4328011115892049 | 0.7872132116224545 | T | T | T |
| 0.7943950616364713 | 0.4333261303965523 | 0.6106380677830094 | T | T | T |
| 0.6968435765176914 | 0.4218110555689203 | 0.4726479173237859 | T | T | T |
| 0.6003108948441953 | 0.4282121924815687 | 0.6085112839824303 | T | T | T |
| 0.6041912960156222 | 0.4425916192566610 | 0.8041795696158802 | T | T | T |
| 0.7311504254791186 | 0.4742037534617956 | 0.7713013692307505 | T | T | T |
| 0.8624411500302189 | 0.6823149445818825 | 0.7431601079915376 | T | T | T |
| 0.8180575198953294 | 0.6393226773587357 | 0.5544634814450771 | T | T | T |
| 0.6923467192422428 | 0.6479778944127647 | 0.4929926659540635 | T | T | T |
| 0.5834273323981601 | 0.6685717662161916 | 0.6011341752942589 | T | T | T |
| 0.5994262161339254 | 0.6591437458206096 | 0.7967933080896030 | T | T | T |
| 0.7239099852380935 | 0.6437284595825312 | 0.7331820105732513 | T | T | T |
| 0.8308653355797668 | 0.5465299710479663 | 0.6890545027011710 | T | T | T |
| 0.5817229907636687 | 0.5483120341078559 | 0.6860065641787012 | T | T | T |
| 0.9302122043730838 | 0.3774706339464117 | 0.9324972162113725 | T | T | T |
| 0.9149188124492555 | 0.5102824274942265 | 0.9307214480101094 | T | T | T |
| 0.8936374657922711 | 0.6405773011359406 | 0.9271463421409903 | T | T | T |
| 0.6974308595211193 | 0.3730480100356426 | 0.8934766552518941 | T | T | T |
| 0.6757321923706717 | 0.5019357975574991 | 0.9443033438008729 | T | T | T |
| 0.6934889604786088 | 0.6356093362396376 | 0.9301483261394347 | T | T | T |
| 0.4891121504385737 | 0.4526401158451952 | 0.7138478740841837 | T | T | T |
| 0.4815304214842532 | 0.6330225576954479 | 0.7153847210899273 | T | T | T |
| 0.6424724737227144 | 0.9402280049242906 | 0.2859761462004741 | T | T | T |
| 0.7010298703185343 | 0.9313338203577159 | 0.1105219761644800 | T | T | T |
| 0.8022340199742567 | 0.9406936505416293 | 0.9800094967022273 | T | T | T |
| 0.9006202599385117 | 0.9289779777102172 | 0.1136730276519085 | T | T | T |
| 0.8993232599265271 | 0.9461221117873457 | 0.3109463176680594 | T | T | T |
| 0.7721046017384025 | 0.9645515992611665 | 0.2687731624125889 | T | T | T |
| 0.6430020261627037 | 0.1708428340468082 | 0.2553817963108674 | T | T | T |
| 0.6977960470941006 | 0.1583503586354999 | 0.0800510065321826 | T | T | T |
| 0.8112795571828769 | 0.1467251391900413 | 0.9805731727819185 | T | T | T |
| 0.9149068158514282 | 0.1678634629154141 | 0.1003341799309494 | T | T | T |
| 0.8987535653955447 | 0.1578777312439249 | 0.2977014722720818 | T | T | T |
| 0.7733450504140863 | 0.1455981885751156 | 0.2424833899383662 | T | T | T |
| 0.6842375769692730 | 0.0511996629162958 | 0.1958749088023043 | T | T | T |
| 0.9200545128522500 | 0.0491242827670895 | 0.1869958801246937 | T | T | T |
| 0.5714346411424241 | 0.8748698807171346 | 0.4218345504130194 | T | T | T |
| 0.5835203811967072 | 0.0065087886412350 | 0.4373711689712486 | T | T | T |
| 0.6007242859968972 | 0.1382351842196312 | 0.4375405560427831 | T | T | T |

**Structure files (CONTCAR) involved in this work:**

|                    |                     |                    |   |   |   |
|--------------------|---------------------|--------------------|---|---|---|
| 0.8108642097498325 | 0.8701712091494873  | 0.3995508994110520 | T | T | T |
| 0.8192107553269653 | 0.9996118107479439  | 0.4471857612369295 | T | T | T |
| 0.8059867035383397 | 0.1334845240636055  | 0.4351662718325163 | T | T | T |
| 0.0127100261517702 | 0.9543691631125103  | 0.2171401411983409 | T | T | T |
| 0.0172785684314551 | 0.1376527442971322  | 0.2173655333164216 | T | T | T |
| 0.8610968722938137 | 0.0566800580743571  | 0.7848799029353599 | T | T | T |
| 0.8036324630328993 | 0.0726258229770467  | 0.6091691023030854 | T | T | T |
| 0.7022056181035854 | 0.0560304086060639  | 0.4804865970203935 | T | T | T |
| 0.6009607306684086 | 0.0732058754927777  | 0.6079543819292142 | T | T | T |
| 0.6055989779307177 | 0.0502667414673750  | 0.8049216358417955 | T | T | T |
| 0.7320430325268659 | 0.0295472446669483  | 0.7620309347697942 | T | T | T |
| 0.8579428242485097 | 0.8356625519264351  | 0.7701914923638656 | T | T | T |
| 0.8059580023581082 | 0.8325298758878511  | 0.5912732002974241 | T | T | T |
| 0.6942154398157608 | 0.8514183287231252  | 0.4874957354041095 | T | T | T |
| 0.5903539056837247 | 0.8275724905275080  | 0.6064626474154203 | T | T | T |
| 0.6037495164865507 | 0.8491309307764897  | 0.8013811515670203 | T | T | T |
| 0.7294074351799283 | 0.8635072218757487  | 0.7471239694378186 | T | T | T |
| 0.8218555806923765 | 0.9493184164193300  | 0.6819051428152434 | T | T | T |
| 0.5819700145675182 | 0.9509674952613733  | 0.6753937329368336 | T | T | T |
| 0.9338639767398171 | 0.1281421581179943  | 0.9118662764727222 | T | T | T |
| 0.9179296484819802 | 0.9986000889912483  | 0.9451286492043229 | T | T | T |
| 0.9108945949490881 | 0.8655255706950176  | 0.9450930469645190 | T | T | T |
| 0.6962051801481374 | 0.1276529069250953  | 0.8869744323873252 | T | T | T |
| 0.6865074127062829 | -0.0001586487412457 | 0.9434924369151597 | T | T | T |
| 0.6963445070317215 | 0.8653358995219952  | 0.9409101199146652 | T | T | T |
| 0.4908274980498590 | 0.0453250741054959  | 0.7149582318949679 | T | T | T |
| 0.4855462717148187 | 0.8633647602755332  | 0.7168167664681512 | T | T | T |
| 0.3575937915624734 | 0.4374157918942066  | 0.7135023326165034 | T | T | T |
| 0.3031874254123468 | 0.4293310621344722  | 0.8922013210336488 | T | T | T |
| 0.2030457905857013 | 0.4567301596862479  | 0.0189635981026656 | T | T | T |
| 0.0996887300325457 | 0.4338062117954393  | 0.8984606263606174 | T | T | T |
| 0.1027371681560427 | 0.4402537379884950  | 0.6997485679818838 | T | T | T |
| 0.2293757511745963 | 0.4688036512489618  | 0.7392811784272649 | T | T | T |
| 0.3563281181425821 | 0.6704859864374998  | 0.7399181610429171 | T | T | T |
| 0.3025824925134858 | 0.6597445661378103  | 0.9161790521459503 | T | T | T |
| 0.1890747520232798 | 0.6443751905128293  | 0.0147518788300344 | T | T | T |
| 0.0856044579051792 | 0.6675477641407630  | 0.8968639731594987 | T | T | T |
| 0.1030852042945283 | 0.6581929564528971  | 0.7005366927518950 | T | T | T |
| 0.2284696338264021 | 0.6376449646129679  | 0.7541324081622062 | T | T | T |
| 0.3225716412441424 | 0.5498739548403990  | 0.8080827731146889 | T | T | T |
| 0.0806059822561564 | 0.5490120387452522  | 0.8083443963354898 | T | T | T |
| 0.4324034146036528 | 0.3747111676477999  | 0.5781409281662154 | T | T | T |
| 0.4190541984116825 | 0.5060645130277180  | 0.5668701936586678 | T | T | T |
| 0.3974333570975116 | 0.6373852709799774  | 0.5585335315216595 | T | T | T |
| 0.1976177739954487 | 0.3695821318695372  | 0.6142697290476447 | T | T | T |
| 0.1776968562216052 | 0.4968718520186047  | 0.5603140925863855 | T | T | T |
| 0.1929376722977288 | 0.6306457045795024  | 0.5613150880177873 | T | T | T |
| 0.9881330700793481 | 0.4511217915766482  | 0.7922574563833525 | T | T | T |
| 0.9834246676496188 | 0.6371352227286978  | 0.7779103233506788 | T | T | T |
| 0.1428366821933034 | 0.5631951250936698  | 0.2209297224216968 | T | T | T |
| 0.2005825826582929 | 0.5633008980708373  | 0.3942286432642378 | T | T | T |
| 0.2975462432939358 | 0.5500613652732139  | 0.5315735579143275 | T | T | T |
| 0.3925543342847848 | 0.5668583759229766  | 0.3941297535713465 | T | T | T |



**Structure files (CONTCAR) involved in this work:**

|                     |                    |                    |   |   |   |
|---------------------|--------------------|--------------------|---|---|---|
| 0.3973776237640513  | 0.5560505101374253 | 0.1977008523626623 | T | T | T |
| 0.2712786654904612  | 0.5275661197064913 | 0.2344018541028183 | T | T | T |
| 0.1425678940306940  | 0.3241303903025184 | 0.2448751770629487 | T | T | T |
| 0.1933448686435703  | 0.3416766644645517 | 0.4215262552488269 | T | T | T |
| 0.3103304392453827  | 0.3526293977485841 | 0.5115205115969896 | T | T | T |
| 0.4133619218267781  | 0.3273980131880134 | 0.3922540941354458 | T | T | T |
| 0.3934002149427021  | 0.3420101697688179 | 0.1959914022539210 | T | T | T |
| 0.2708180575745947  | 0.3552770254577603 | 0.2604568643147918 | T | T | T |
| 0.1768962567624457  | 0.4466174973211984 | 0.3025823514175366 | T | T | T |
| 0.4139783895268725  | 0.4481271093646508 | 0.3135617186223463 | T | T | T |
| 0.0674651323746929  | 0.6229347080470878 | 0.0839174464071325 | T | T | T |
| 0.0820354257974477  | 0.4910656840564316 | 0.0781049341354352 | T | T | T |
| 0.1136766690184678  | 0.3615558871488917 | 0.0588043206549729 | T | T | T |
| 0.3040265395282233  | 0.6259828210082610 | 0.1080778872889701 | T | T | T |
| 0.3249077513867040  | 0.4972514367006184 | 0.0582798609066773 | T | T | T |
| 0.2959040548421819  | 0.3654696482175943 | 0.0642825659469554 | T | T | T |
| 0.5077034778005404  | 0.5418658130742867 | 0.2982516048247495 | T | T | T |
| 0.5128079941558900  | 0.3618243328469229 | 0.2705074245552077 | T | T | T |
| 0.4393318680072290  | 0.7492793875601774 | 0.6397940087926662 | T | T | T |
| 0.1963822947234804  | 0.7480285897389004 | 0.6499627595992343 | T | T | T |
| 0.2699062229284392  | 0.7475350048165090 | 0.0572306081270929 | T | T | T |
| 0.1064567749550580  | 0.7471546592610376 | 0.0508369739882546 | T | T | T |
| 0.0654730698109479  | 0.2484567351099850 | 0.1316210423458723 | T | T | T |
| 0.3036820526328493  | 0.2476635349755731 | 0.1512740274275377 | T | T | T |
| 0.2299361969891116  | 0.2494214021135517 | 0.5550094051420462 | T | T | T |
| 0.3929387534495139  | 0.2501019098843666 | 0.5489570969160134 | T | T | T |
| 0.5584115473236485  | 0.2489222361420468 | 0.3528486405227680 | T | T | T |
| 0.8123744175470440  | 0.2525765554021803 | 0.3512229127760034 | T | T | T |
| 0.7283395336152201  | 0.2490742412326293 | 0.9405799478800410 | T | T | T |
| 0.8927462250512198  | 0.2510275741111681 | 0.9503678579128220 | T | T | T |
| 0.9443153811020683  | 0.7524665122596700 | 0.8586731482680371 | T | T | T |
| 0.6913027348899526  | 0.7517176080874526 | 0.8414027621115522 | T | T | T |
| 0.7762342637689125  | 0.7479074009625241 | 0.4485337828290946 | T | T | T |
| 0.6108379057173997  | 0.7500793694253121 | 0.4503627295838757 | T | T | T |
| 0.9419816628105251  | 0.4924039455442796 | 0.5024016412470069 | T | T | T |
| 0.8228819460748367  | 0.3359057945637159 | 0.3257920482756074 | T | T | T |
| 0.8033143460492376  | 0.6332309135616433 | 0.6879051329418017 | T | T | T |
| 0.9267835284804324  | 0.5326424602437919 | 0.1975293897492127 | T | T | T |
| 0.9243387862847396  | 0.4227449810982439 | 0.4166883847456552 | T | T | T |
| 0.8715254134851675  | 0.5479472115333285 | 0.5486259929770581 | T | T | T |
| -0.0010880261935675 | 0.6263832006911612 | 0.3851154936069228 | T | T | T |
| 0.0116493200459770  | 0.5579863099960803 | 0.4826339125289076 | T | T | T |
| 0.0351300695522499  | 0.4225025381073932 | 0.5001420047313123 | T | T | T |
| 0.0755231044078593  | 0.5729545212269429 | 0.3804683426513240 | T | T | T |
| 0.0403906070360957  | 0.4375239880438309 | 0.3637509041027560 | T | T | T |
| 0.0208963840155289  | 0.3528444732923562 | 0.4104095575613503 | T | T | T |
| 0.0280117170959850  | 0.5849746049776559 | 0.4156751863287582 | T | T | T |
| 0.0204608976672886  | 0.4070865874437404 | 0.4249556816185556 | T | T | T |

**Figure S17 ZnCu-FS**

Si O Al Cu Zn H C

1.0000000000000000

20.0219999999999985 0.0000000000000000 0.0000000000000000

0.0000000000000000 19.8990000000000009 0.0000000000000000

**Structure files (CONTCAR) involved in this work:**

0.0000000000000000 0.0000000000000000 13.382999999999991  
93 193 3 1 1 6 2

Selective dynamics

Direct

|                    |                    |                    |   |   |   |
|--------------------|--------------------|--------------------|---|---|---|
| 0.4240513980213980 | 0.0573484200287791 | 0.6467821878972757 | T | T | T |
| 0.3046368127768244 | 0.0265906368085756 | 0.7911514567844100 | T | T | T |
| 0.2828712621017649 | 0.0592714737804324 | 0.0131048771648852 | T | T | T |
| 0.1233143091390940 | 0.0617698385966132 | 0.0110611695530022 | T | T | T |
| 0.0700300480349071 | 0.0294012271383731 | 0.7996120844868078 | T | T | T |
| 0.1799746586650307 | 0.0558169199184351 | 0.6553435417682688 | T | T | T |
| 0.4209074246321301 | 0.8266025724216215 | 0.6674674221819055 | T | T | T |
| 0.3045520156700075 | 0.8677686885638098 | 0.8089478787503627 | T | T | T |
| 0.2676402753516588 | 0.8275301318138200 | 0.0274798465136586 | T | T | T |
| 0.1132351496082727 | 0.8250569065883233 | 0.0127464035601105 | T | T | T |
| 0.0663129578812084 | 0.8722732698745039 | 0.7992514983946816 | T | T | T |
| 0.1828511315712163 | 0.8271973463616517 | 0.6710713557837562 | T | T | T |
| 0.0780746695816562 | 0.9407562059436074 | 0.1474356509065940 | T | T | T |
| 0.1975104793051446 | 0.9714991237458477 | 0.2912330537908239 | T | T | T |
| 0.2194186482629532 | 0.9373519418131138 | 0.5133394190771069 | T | T | T |
| 0.3791368408669484 | 0.9347652997258473 | 0.5124206217226299 | T | T | T |
| 0.4333349898020200 | 0.9682624118651394 | 0.3007775638544458 | T | T | T |
| 0.3225188452905425 | 0.9423606173983267 | 0.1564998993193382 | T | T | T |
| 0.0823075697515454 | 0.1718359840127421 | 0.1644172331064399 | T | T | T |
| 0.1970128434010672 | 0.1297462761328914 | 0.3078809024251025 | T | T | T |
| 0.2332748533711073 | 0.1712778861451839 | 0.5250384775244945 | T | T | T |
| 0.3880482084761687 | 0.1734905622667742 | 0.5105782719140919 | T | T | T |
| 0.4369375042014674 | 0.1265876860921811 | 0.2981432983738869 | T | T | T |
| 0.3184228924877918 | 0.1693132299664390 | 0.1713388602893680 | T | T | T |
| 0.5771486500507697 | 0.5555265720486110 | 0.3549504375504124 | T | T | T |
| 0.6917644002155162 | 0.5248948657594761 | 0.2024711685249327 | T | T | T |
| 0.7148286954368582 | 0.5674758366528893 | 0.9864256994775162 | T | T | T |
| 0.8726868345669924 | 0.5722480176873577 | 0.9872736983600719 | T | T | T |
| 0.8117252540136213 | 0.5507636696101456 | 0.3438708955432913 | T | T | T |
| 0.5740752981413529 | 0.3276218096822009 | 0.3322609424636107 | T | T | T |
| 0.6957057619465793 | 0.3709421427957783 | 0.1945021553324717 | T | T | T |
| 0.7300738030441705 | 0.3261421445545277 | 0.9815309406150814 | T | T | T |
| 0.8846158954409430 | 0.3259332457511800 | 0.9969920253412050 | T | T | T |
| 0.9410612471987494 | 0.3763542445930044 | 0.1907932742608680 | T | T | T |
| 0.9204273576922379 | 0.4446539681738880 | 0.8624711026246211 | T | T | T |
| 0.7995145174491549 | 0.4709233416857384 | 0.7221990276374483 | T | T | T |
| 0.7743588089104925 | 0.4355990451537546 | 0.4962385862993892 | T | T | T |
| 0.6171889404137563 | 0.4289280925923245 | 0.4899066876400114 | T | T | T |
| 0.5685379953245167 | 0.4689137906733938 | 0.7028220147975590 | T | T | T |
| 0.6743748311602653 | 0.4466758841819208 | 0.8592131233828945 | T | T | T |
| 0.9205779921287763 | 0.6774119578663992 | 0.8302694253251048 | T | T | T |
| 0.7687268197608759 | 0.6684597342224990 | 0.4656792776686496 | T | T | T |
| 0.6139847159530304 | 0.6728195306892628 | 0.4881283715186608 | T | T | T |
| 0.5609439272691337 | 0.6270859127145205 | 0.6991852586945951 | T | T | T |
| 0.6732994444616871 | 0.6735834220055799 | 0.8277613936160489 | T | T | T |
| 0.5787078155281076 | 0.9443009749310324 | 0.3587417430742688 | T | T | T |
| 0.6995494563179173 | 0.9730252256934150 | 0.2156098076839942 | T | T | T |
| 0.7215917954553022 | 0.9371042347036862 | 0.9932861462320913 | T | T | T |
| 0.8819800292720009 | 0.9340217979600832 | 0.9953595820437301 | T | T | T |

**Structure files (CONTCAR) involved in this work:**

|                    |                    |                    |   |   |   |
|--------------------|--------------------|--------------------|---|---|---|
| 0.9340643271828317 | 0.9692373085014645 | 0.2054645563236686 | T | T | T |
| 0.8242256753844278 | 0.9453261917920559 | 0.3546670683593848 | T | T | T |
| 0.5798364402811239 | 0.1728621341848860 | 0.3299564020286357 | T | T | T |
| 0.6993731735174012 | 0.1317744663234279 | 0.1936926232508848 | T | T | T |
| 0.7331829703310858 | 0.1703590368144361 | 0.9722885800168762 | T | T | T |
| 0.8879251443634116 | 0.1733020900435022 | 0.9852828425969236 | T | T | T |
| 0.9375832180118815 | 0.1272945739750327 | 0.1985767583149219 | T | T | T |
| 0.8220691753100240 | 0.1732068278025999 | 0.3306750650888866 | T | T | T |
| 0.9246780125221257 | 0.0549163365657378 | 0.8569763328648986 | T | T | T |
| 0.8042031695796045 | 0.0260485833580990 | 0.7090398635086419 | T | T | T |
| 0.7826612469013592 | 0.0653401927545539 | 0.4914202099425908 | T | T | T |
| 0.6224379997822249 | 0.0686683592143178 | 0.4904607356453946 | T | T | T |
| 0.5691651730080109 | 0.0312954769967809 | 0.6991041703249452 | T | T | T |
| 0.6804196460369867 | 0.0529050166208792 | 0.8479982580555039 | T | T | T |
| 0.9243669837135040 | 0.8296850361364129 | 0.8367835356040618 | T | T | T |
| 0.8035673929427235 | 0.8688063578211201 | 0.6966118671970484 | T | T | T |
| 0.7709611826342108 | 0.8262649292115219 | 0.4795869465190580 | T | T | T |
| 0.6161012541882808 | 0.8264384249932344 | 0.4916188879508688 | T | T | T |
| 0.5650307331585724 | 0.8743798677901352 | 0.6992487156434579 | T | T | T |
| 0.6796926030244675 | 0.8326278855344348 | 0.8335612899718199 | T | T | T |
| 0.4239188814283892 | 0.4444020063235498 | 0.6394833335603420 | T | T | T |
| 0.3040677502684127 | 0.4715746944715987 | 0.7863325051931093 | T | T | T |
| 0.2821156119150811 | 0.4362993103018755 | 0.0049131847655652 | T | T | T |
| 0.1242635162805985 | 0.4354831386015754 | 0.0100068834913211 | T | T | T |
| 0.0655215620451812 | 0.4695035582741656 | 0.8010545563580865 | T | T | T |
| 0.1772486454764590 | 0.4447730983678213 | 0.6536609038027579 | T | T | T |
| 0.4183502380000482 | 0.6725885801584689 | 0.6595940946777784 | T | T | T |
| 0.3020073579953225 | 0.6293038652361457 | 0.8021108678017135 | T | T | T |
| 0.2685590058250853 | 0.6705493877991510 | 0.0203949108989813 | T | T | T |
| 0.1144337897050385 | 0.6713417344880898 | 0.0064723698448002 | T | T | T |
| 0.0633273874204836 | 0.6281914598479681 | 0.7959180040219319 | T | T | T |
| 0.1804606202986324 | 0.6683583627579371 | 0.6657417926564686 | T | T | T |
| 0.0755456551720228 | 0.5567856763116126 | 0.1467101779930976 | T | T | T |
| 0.1984151128898907 | 0.5266121629601606 | 0.2829826840367560 | T | T | T |
| 0.2194994271678090 | 0.5607561743743669 | 0.5097579561036347 | T | T | T |
| 0.3776685579500959 | 0.5661994039130931 | 0.5076878056115851 | T | T | T |
| 0.4292970807132603 | 0.5277415779325050 | 0.2982973791674439 | T | T | T |
| 0.3241490221708720 | 0.5524950084974332 | 0.1456876635564157 | T | T | T |
| 0.0857372320246205 | 0.3248914342758785 | 0.1582516510765483 | T | T | T |
| 0.1964910112108667 | 0.3686886220644253 | 0.3051824230256158 | T | T | T |
| 0.2318456524425126 | 0.3293308752085814 | 0.5246435362156086 | T | T | T |
| 0.3861658192458539 | 0.3270111613550905 | 0.5059703733302890 | T | T | T |
| 0.4324662574329131 | 0.3703316542739551 | 0.2924634647220418 | T | T | T |
| 0.3155020023405643 | 0.3278538269524086 | 0.1659190409423153 | T | T | T |
| 0.3585584731961868 | 0.0617135535875647 | 0.7176469460710968 | T | T | T |
| 0.3075251077472320 | 0.0648490909817310 | 0.8980440210816673 | T | T | T |
| 0.2027756885791123 | 0.0467261977956199 | 0.0188687288683197 | T | T | T |
| 0.0997684275029777 | 0.0689578098261737 | 0.8959746528501999 | T | T | T |
| 0.1043134247258459 | 0.0586769728965540 | 0.6986265303956446 | T | T | T |
| 0.2299482798768539 | 0.0336044827433510 | 0.7451796701573430 | T | T | T |
| 0.3608474026968841 | 0.8260919844362522 | 0.7484499401730169 | T | T | T |
| 0.3066766023087167 | 0.8430067673130092 | 0.9238868023214714 | T | T | T |
| 0.1902789600504831 | 0.8515408878930492 | 0.0162089282317480 | T | T | T |

**Structure files (CONTCAR) involved in this work:**

|                    |                    |                    |   |   |   |
|--------------------|--------------------|--------------------|---|---|---|
| 0.0857549168205414 | 0.8308562428571262 | 0.8993899718517114 | T | T | T |
| 0.1055553851294789 | 0.8400013544657994 | 0.7039233624900446 | T | T | T |
| 0.2310525141493821 | 0.8529309835514338 | 0.7615500484806781 | T | T | T |
| 0.3221189898521499 | 0.9473042187740459 | 0.8029463661294090 | T | T | T |
| 0.0881395934411513 | 0.9502605942350970 | 0.8125604485013567 | T | T | T |
| 0.4319627860100477 | 0.1275211696495180 | 0.5858282497294307 | T | T | T |
| 0.4185059158119007 | 0.9958573474948212 | 0.5671127234507878 | T | T | T |
| 0.3971361792051915 | 0.8638714532728857 | 0.5656261211080614 | T | T | T |
| 0.1992512545004891 | 0.1302801181568570 | 0.6159820528082435 | T | T | T |
| 0.1829092039016885 | 0.0015868318954600 | 0.5646744436991611 | T | T | T |
| 0.1992122430880487 | 0.8675905295910573 | 0.5685034029341985 | T | T | T |
| 0.9901850471615997 | 0.0407941580779188 | 0.7888615417731571 | T | T | T |
| 0.9862035641588344 | 0.8677052082321723 | 0.7805417108400187 | T | T | T |
| 0.1443910868356817 | 0.9360781420623661 | 0.2167282704150705 | T | T | T |
| 0.1952220826164246 | 0.9327667524471398 | 0.3979095783358544 | T | T | T |
| 0.2995527285826499 | 0.9491461264022630 | 0.5202040601612115 | T | T | T |
| 0.4027071588406282 | 0.9292926554649472 | 0.3971693849034820 | T | T | T |
| 0.3980732992173796 | 0.9397778165987114 | 0.2001298782884145 | T | T | T |
| 0.2723990932148449 | 0.9662084498841900 | 0.2454810719257264 | T | T | T |
| 0.1426416447302959 | 0.1722307280573948 | 0.2449459696952009 | T | T | T |
| 0.1935590481745115 | 0.1562122119934292 | 0.4220340052531324 | T | T | T |
| 0.3106854036528615 | 0.1480230968829949 | 0.5123476643931427 | T | T | T |
| 0.4167239752368068 | 0.1682969860842293 | 0.3978948900979160 | T | T | T |
| 0.3961282103099373 | 0.1577238114894298 | 0.2033008649977623 | T | T | T |
| 0.2714769174846690 | 0.1425356200154034 | 0.2627854836820394 | T | T | T |
| 0.1782621567111182 | 0.0504192942263910 | 0.3039875175636758 | T | T | T |
| 0.4177375888597417 | 0.0480450217067189 | 0.3132238476308912 | T | T | T |
| 0.0683569601813035 | 0.8701147044913660 | 0.0882981109924670 | T | T | T |
| 0.0835063612604977 | 0.0007537654266815 | 0.0651428990025615 | T | T | T |
| 0.1054222952892882 | 0.1323760917737379 | 0.0645223663504625 | T | T | T |
| 0.3026452698505107 | 0.8677841018195397 | 0.1184720654237512 | T | T | T |
| 0.3201633573899168 | 0.9954927945397063 | 0.0643212171837818 | T | T | T |
| 0.3020263744516173 | 0.1289269361321391 | 0.0690019445942867 | T | T | T |
| 0.5128572895868634 | 0.9544293853792692 | 0.2897899430997322 | T | T | T |
| 0.5168353051199793 | 0.1337116464054727 | 0.2787192151071232 | T | T | T |
| 0.6375397763902139 | 0.5601316172023358 | 0.2752744093431245 | T | T | T |
| 0.7011819527707709 | 0.5728868612158852 | 0.1059009617193074 | T | T | T |
| 0.7936741228991924 | 0.5585738345274887 | 0.9606841615638881 | T | T | T |
| 0.8852457632285138 | 0.5782458286167836 | 0.1047883108974371 | T | T | T |
| 0.8885553577048537 | 0.5369972944303850 | 0.3173123372258892 | T | T | T |
| 0.7623516036002973 | 0.5200204228156177 | 0.2621484109121032 | T | T | T |
| 0.6418527964385757 | 0.3353552457285440 | 0.2686310401281153 | T | T | T |
| 0.6917160051941146 | 0.3317256042392103 | 0.0877059788609258 | T | T | T |
| 0.8073377842682972 | 0.3511633168150272 | 0.9928569928393315 | T | T | T |
| 0.9095953885472607 | 0.3213555095054368 | 0.1132794435702390 | T | T | T |
| 0.9107072065389656 | 0.3617495097925173 | 0.3056234425244562 | T | T | T |
| 0.7693642351073433 | 0.3676962403555742 | 0.2414352362531647 | T | T | T |
| 0.6708376489122079 | 0.4485215765995328 | 0.1747907788143483 | T | T | T |
| 0.9222751886977709 | 0.4498076897095611 | 0.1560928323677008 | T | T | T |
| 0.5701381555472136 | 0.6270653692950033 | 0.4122673045960114 | T | T | T |
| 0.5909371682232563 | 0.4977742360989397 | 0.4384945335772210 | T | T | T |
| 0.5810912709507913 | 0.3641522811782274 | 0.4410323021832229 | T | T | T |
| 0.7971564609526652 | 0.6297600265433790 | 0.3672578878184536 | T | T | T |

**Structure files (CONTCAR) involved in this work:**

|                    |                    |                     |   |   |   |
|--------------------|--------------------|---------------------|---|---|---|
| 0.7953730301050463 | 0.5131653941139319 | 0.4559139063665337  | T | T | T |
| 0.8245653667914588 | 0.3845782730768872 | 0.43978444813032951 | T | T | T |
| 0.0108517214092859 | 0.5515267607283580 | 0.2158989853291939  | T | T | T |
| 0.0213257487720416 | 0.3646721527497784 | 0.2015917363860740  | T | T | T |
| 0.8565636615023370 | 0.4333542685794371 | 0.7874123674782773  | T | T | T |
| 0.7889953361745917 | 0.4328901190868615 | 0.6150491115915711  | T | T | T |
| 0.6974690843994575 | 0.4219961605128834 | 0.4693538863239496  | T | T | T |
| 0.6028744019645883 | 0.4298258923849332 | 0.6087527521280631  | T | T | T |
| 0.6016742152279484 | 0.4423654255389369 | 0.8061328467948010  | T | T | T |
| 0.7282832258770625 | 0.4732167621615808 | 0.7767730099151113  | T | T | T |
| 0.8610300381901166 | 0.6807244463762084 | 0.7508893807986557  | T | T | T |
| 0.8144816287884263 | 0.6421569768581615 | 0.5616000684848526  | T | T | T |
| 0.6917279441801736 | 0.6471159238328513 | 0.4877434733093353  | T | T | T |
| 0.5843713641299922 | 0.6676142686210415 | 0.5998887302324167  | T | T | T |
| 0.5949726497090941 | 0.6611145940690113 | 0.7969717078350054  | T | T | T |
| 0.7198466261740587 | 0.6473316405162356 | 0.7372393259095598  | T | T | T |
| 0.8249079777417774 | 0.5475642423843099 | 0.6954523009546486  | T | T | T |
| 0.5823856111084875 | 0.5486899531233915 | 0.6883621104556352  | T | T | T |
| 0.9299207968650354 | 0.3776201759023404 | 0.9309519587175583  | T | T | T |
| 0.9131328638255271 | 0.5102305742822660 | 0.9323878774379429  | T | T | T |
| 0.8978525814170191 | 0.6409846955216859 | 0.9332457803441507  | T | T | T |
| 0.6936711226057097 | 0.3722574268408008 | 0.8978042587484057  | T | T | T |
| 0.6736314133332615 | 0.5011164867340105 | 0.9490976478144190  | T | T | T |
| 0.6870561171206895 | 0.6347660629917800 | 0.9328827167349095  | T | T | T |
| 0.4891964757551842 | 0.4527428931504057 | 0.7099667793080352  | T | T | T |
| 0.4801132420034512 | 0.6317913726025433 | 0.7100172738163968  | T | T | T |
| 0.6439719062658236 | 0.9390207863980535 | 0.2876809601845188  | T | T | T |
| 0.6994775449421191 | 0.9335533381741500 | 0.1096311362616323  | T | T | T |
| 0.8020946055659449 | 0.9443739696530644 | 0.9819868712496614  | T | T | T |
| 0.9018274102304646 | 0.9278831090365028 | 0.1124292010918914  | T | T | T |
| 0.8994801620663585 | 0.9462827433353310 | 0.3096527429322414  | T | T | T |
| 0.7729179965630343 | 0.9654668828821903 | 0.2656529572228951  | T | T | T |
| 0.6420588401417069 | 0.1732315851654473 | 0.2528597095540985  | T | T | T |
| 0.6967676842367903 | 0.1556436237114311 | 0.0781304302584581  | T | T | T |
| 0.8109914380083423 | 0.1469422771916419 | 0.9804268010011277  | T | T | T |
| 0.9152511761785408 | 0.1676910256353053 | 0.0987489596003475  | T | T | T |
| 0.8984863280807013 | 0.1555826776342423 | 0.2958193514326389  | T | T | T |
| 0.7723653880234213 | 0.1468040115674654 | 0.2413883986101281  | T | T | T |
| 0.6822925069797924 | 0.0520134727731538 | 0.2004729719117521  | T | T | T |
| 0.9210838734216681 | 0.0482769890516296 | 0.1834343810935766  | T | T | T |
| 0.5707953082429778 | 0.8747709331454604 | 0.4216313546768283  | T | T | T |
| 0.5838373996570861 | 0.0063316992893843 | 0.4373544184798948  | T | T | T |
| 0.6015255043477199 | 0.1380721891633808 | 0.4350130630552423  | T | T | T |
| 0.8096531954132796 | 0.8700247516854768 | 0.3959779908718546  | T | T | T |
| 0.8185980861463278 | 0.9987630892637246 | 0.4457535515143341  | T | T | T |
| 0.8058990526549633 | 0.1327087657358472 | 0.4338390219099798  | T | T | T |
| 0.0133753844256534 | 0.9538336299582488 | 0.2175104195374686  | T | T | T |
| 0.0174198722684303 | 0.1373592029736799 | 0.2160303408026615  | T | T | T |
| 0.8593608949593563 | 0.0555644610597163 | 0.7857332025941811  | T | T | T |
| 0.8045518686771083 | 0.0713993681412380 | 0.6081048936783156  | T | T | T |
| 0.7022078918340581 | 0.0559386289289070 | 0.4813986378778422  | T | T | T |
| 0.5999693972211730 | 0.0747240442846884 | 0.6067427131502279  | T | T | T |
| 0.6049770706542289 | 0.0512415778775912 | 0.8037143174470256  | T | T | T |

**Structure files (CONTCAR) involved in this work:**

|                    |                    |                    |   |   |   |
|--------------------|--------------------|--------------------|---|---|---|
| 0.7306135335702432 | 0.0291804654706720 | 0.7594286361083684 | T | T | T |
| 0.8592928162656280 | 0.8334972434367615 | 0.7656732288926225 | T | T | T |
| 0.8061920972999873 | 0.8325328245081269 | 0.5881077162793783 | T | T | T |
| 0.6936865356647838 | 0.8512270828806239 | 0.4866283725332068 | T | T | T |
| 0.5901827306640918 | 0.8280756202610553 | 0.6063963828134852 | T | T | T |
| 0.6037180840414847 | 0.8522436166343752 | 0.8007196562565038 | T | T | T |
| 0.7299201499824534 | 0.8590019146841903 | 0.7457263720811550 | T | T | T |
| 0.8205191781421149 | 0.9480666420361054 | 0.6825782173224355 | T | T | T |
| 0.5808993192176350 | 0.9523389776057041 | 0.6728531667034223 | T | T | T |
| 0.9329765943150617 | 0.1280386797400761 | 0.9100068026081612 | T | T | T |
| 0.9193182416559509 | 0.9979963319575742 | 0.9439843167302804 | T | T | T |
| 0.9069936874112673 | 0.8651466612924974 | 0.9429117025179495 | T | T | T |
| 0.6969038779967972 | 0.1289778314765076 | 0.8833397668862717 | T | T | T |
| 0.6863400613552719 | 0.0025307501901863 | 0.9430888516997179 | T | T | T |
| 0.6972988423813905 | 0.8684490029406384 | 0.9392462471321865 | T | T | T |
| 0.4901702609944722 | 0.0467538934613611 | 0.7147493610870230 | T | T | T |
| 0.4852943152558196 | 0.8640329381847380 | 0.7162789314436850 | T | T | T |
| 0.3572734851153000 | 0.4396980131596605 | 0.7082733881703380 | T | T | T |
| 0.3069732252287416 | 0.4287926589528015 | 0.8897533968518955 | T | T | T |
| 0.2031153416205166 | 0.4552256690338756 | 0.0090422253894379 | T | T | T |
| 0.0962422288620525 | 0.4301551899919250 | 0.8963809705303132 | T | T | T |
| 0.1011485210558754 | 0.4439463617411273 | 0.6977706111143497 | T | T | T |
| 0.2286652975616122 | 0.4670140062225618 | 0.7412442861814043 | T | T | T |
| 0.3550913334412287 | 0.6700599461782202 | 0.7345915475848044 | T | T | T |
| 0.3051995625983279 | 0.6609285837773077 | 0.9132231430108111 | T | T | T |
| 0.1916230354223981 | 0.6453579225115206 | 0.0105806722579515 | T | T | T |
| 0.0889825784331055 | 0.6711641892518124 | 0.8912963471187674 | T | T | T |
| 0.1028628249648783 | 0.6540440819309793 | 0.6961838236957915 | T | T | T |
| 0.2275799607132129 | 0.6380207971808156 | 0.7544814634830064 | T | T | T |
| 0.3217530452350195 | 0.5501022914620641 | 0.8063952094895250 | T | T | T |
| 0.0795053927496937 | 0.5491346795451958 | 0.8147765626446506 | T | T | T |
| 0.4320613713969625 | 0.3759358862685931 | 0.5743972914950386 | T | T | T |
| 0.4209614819119438 | 0.5078495632307247 | 0.5626424324830884 | T | T | T |
| 0.3971679831623610 | 0.6390978597884943 | 0.5532130224828073 | T | T | T |
| 0.1950190189141903 | 0.3698763302434943 | 0.6142255188686718 | T | T | T |
| 0.1799797736488777 | 0.4977624208516988 | 0.5607986277034511 | T | T | T |
| 0.1961676106954398 | 0.6311974831348283 | 0.5598559202421848 | T | T | T |
| 0.9857999217692097 | 0.4534033918548803 | 0.7891700612927131 | T | T | T |
| 0.9837831484376416 | 0.6373398729027703 | 0.7786078147449812 | T | T | T |
| 0.1432448466517624 | 0.5643816480856186 | 0.2151806366170120 | T | T | T |
| 0.2005455037541873 | 0.5631271378687371 | 0.3919566951015653 | T | T | T |
| 0.2990524235958893 | 0.5495147683141006 | 0.5262131250128633 | T | T | T |
| 0.3943928069965359 | 0.5685500692315366 | 0.3895744660818476 | T | T | T |
| 0.3986259463736694 | 0.5545521619753011 | 0.1934393773229491 | T | T | T |
| 0.2717925513417353 | 0.5298865875891648 | 0.2326172075249761 | T | T | T |
| 0.1417993451335185 | 0.3245300349337645 | 0.2456705387931552 | T | T | T |
| 0.1928083874636616 | 0.3453852546273913 | 0.4209913804656143 | T | T | T |
| 0.3090983343682933 | 0.3534654339711989 | 0.5132277524989783 | T | T | T |
| 0.4104433683861298 | 0.3272637727545066 | 0.3903602462100465 | T | T | T |
| 0.3931128400284917 | 0.3429195737317699 | 0.1941578895683715 | T | T | T |
| 0.2703886512359115 | 0.3553195529274961 | 0.2592134599459612 | T | T | T |
| 0.1770067546333942 | 0.4479902864153896 | 0.2972473862866867 | T | T | T |
| 0.4135228819311564 | 0.4483619711773127 | 0.3134831973285476 | T | T | T |

**Structure files (CONTCAR) involved in this work:**

|                    |                    |                    |   |   |   |
|--------------------|--------------------|--------------------|---|---|---|
| 0.0691059469133897 | 0.6226282869116158 | 0.0747303372523966 | T | T | T |
| 0.0836477305576000 | 0.4910171373236136 | 0.0737179733285160 | T | T | T |
| 0.1149181787488581 | 0.3612890684570079 | 0.0589441957508897 | T | T | T |
| 0.3064788616487222 | 0.6268513270983249 | 0.1050633095886848 | T | T | T |
| 0.3235673222432286 | 0.4976367002660461 | 0.0557462682779753 | T | T | T |
| 0.2955540570138326 | 0.3658049482795230 | 0.0627095727759483 | T | T | T |
| 0.5090168909149090 | 0.5401191701879194 | 0.2946945565829544 | T | T | T |
| 0.5119677907762838 | 0.3617714111668219 | 0.2717129239072439 | T | T | T |
| 0.4396208201079524 | 0.7497531062748202 | 0.6386998684536536 | T | T | T |
| 0.1945325901818410 | 0.7477799507120531 | 0.6500891715265678 | T | T | T |
| 0.2722289527549447 | 0.7484014969926436 | 0.0544178069439927 | T | T | T |
| 0.1092256236650467 | 0.7475105377854296 | 0.0489976743398305 | T | T | T |
| 0.0656222325533893 | 0.2483978295682046 | 0.1309177185584665 | T | T | T |
| 0.3038712131883545 | 0.2481555749271954 | 0.1497378960737965 | T | T | T |
| 0.2279655063978065 | 0.2504142389530409 | 0.5520633651826706 | T | T | T |
| 0.3923220924925511 | 0.2509198882499405 | 0.5482672425706209 | T | T | T |
| 0.5578459479912362 | 0.2494166571147148 | 0.3541999231816187 | T | T | T |
| 0.8149100834108665 | 0.2518763562972738 | 0.3507067982714347 | T | T | T |
| 0.7277116460123418 | 0.2491108701121762 | 0.9426700433572817 | T | T | T |
| 0.8922414040632585 | 0.2512005044132147 | 0.9492342620654722 | T | T | T |
| 0.9456502838695744 | 0.7528213269479822 | 0.8591866184044149 | T | T | T |
| 0.6859960143195344 | 0.7527094596386841 | 0.8496116810734776 | T | T | T |
| 0.7755212973302048 | 0.7478859130962618 | 0.4462531779959333 | T | T | T |
| 0.6102820686878159 | 0.7500153393246137 | 0.4500795150029037 | T | T | T |
| 0.9221130266742879 | 0.4774097550446557 | 0.5354432600191884 | T | T | T |
| 0.8242236549403847 | 0.3354878535374992 | 0.3277826241353683 | T | T | T |
| 0.7995069860222266 | 0.6350081802619064 | 0.6960574486412116 | T | T | T |
| 0.9268411152366922 | 0.5326537408516732 | 0.1960323010988475 | T | T | T |
| 0.9220556395192027 | 0.4223713170929289 | 0.4202191753530467 | T | T | T |
| 0.8637049110916990 | 0.5536960604088318 | 0.5564961738984621 | T | T | T |
| 0.0045986095797394 | 0.5545664149949550 | 0.4070721654907314 | T | T | T |
| 0.0419530155487242 | 0.5216344687165506 | 0.5208222873265643 | T | T | T |
| 0.9514614836621301 | 0.4637309460329718 | 0.5900382966896297 | T | T | T |
| 0.0868117415053364 | 0.5267158522990113 | 0.4068706340301226 | T | T | T |
| 0.0220707420037150 | 0.4398545663032289 | 0.3248486204914476 | T | T | T |
| 0.0387762006263111 | 0.4048620113011709 | 0.4494140835609296 | T | T | T |
| 0.0371708437812696 | 0.5159381641962257 | 0.4398320715174462 | T | T | T |
| 0.0196340823566868 | 0.4476793105733433 | 0.4057589489156540 | T | T | T |

**Figure S17 ZnPd-IS**

Si O Al Pd Zn H C

1.0000000000000000

20.0219999999999985 0.0000000000000000 0.0000000000000000

0.0000000000000000 19.8990000000000009 0.0000000000000000

0.0000000000000000 0.0000000000000000 13.3829999999999991

93 193 3 1 1 6 2

Selective dynamics

Direct

|                    |                    |                    |   |   |   |
|--------------------|--------------------|--------------------|---|---|---|
| 0.4240221635106289 | 0.0571787760333591 | 0.6473991697090935 | T | T | T |
| 0.3046886196234119 | 0.0265666335498725 | 0.7919920492182539 | T | T | T |
| 0.2826332140771163 | 0.0600649760155477 | 0.0133869084722019 | T | T | T |
| 0.1233267290872297 | 0.0614100272651859 | 0.0111304553368132 | T | T | T |
| 0.0706877645285091 | 0.0291074817378118 | 0.7995894406946313 | T | T | T |
| 0.1804983488389093 | 0.0549343796833597 | 0.6550309807576976 | T | T | T |

**Structure files (CONTCAR) involved in this work:**

|                    |                    |                    |   |   |   |
|--------------------|--------------------|--------------------|---|---|---|
| 0.4205986442550527 | 0.8261678544461604 | 0.6676036489784001 | T | T | T |
| 0.3042280277598668 | 0.8684150420667820 | 0.8091940452016276 | T | T | T |
| 0.2663375501990216 | 0.8275004918133100 | 0.0273774954485099 | T | T | T |
| 0.1117152707729650 | 0.8259618715302214 | 0.0140964840197217 | T | T | T |
| 0.0660681475457063 | 0.8722472915578645 | 0.7996976285374796 | T | T | T |
| 0.1828591048322562 | 0.8279197839512965 | 0.6716205003073027 | T | T | T |
| 0.0767218426752060 | 0.9417327767497888 | 0.1483806521578373 | T | T | T |
| 0.1972646777339709 | 0.9717987650818689 | 0.2915762539992483 | T | T | T |
| 0.2194971892472637 | 0.9368682894487020 | 0.5131669640893850 | T | T | T |
| 0.3792574102965777 | 0.9344174036368875 | 0.5130285331593416 | T | T | T |
| 0.4325509476845423 | 0.9687017483545934 | 0.3006569027117235 | T | T | T |
| 0.3222119900279959 | 0.9429198705561941 | 0.1551851747745460 | T | T | T |
| 0.0814000342919569 | 0.1706897764079399 | 0.1654132051870058 | T | T | T |
| 0.1965590481431082 | 0.1300573703289588 | 0.3098187294291681 | T | T | T |
| 0.2340217382959820 | 0.1711191010181526 | 0.5263675799291611 | T | T | T |
| 0.3884959530521151 | 0.1732968336704992 | 0.5105877557734827 | T | T | T |
| 0.4368152084240076 | 0.1270464360482757 | 0.2976340247488763 | T | T | T |
| 0.3176238054516863 | 0.1701989227756701 | 0.1720895571218607 | T | T | T |
| 0.5759602068738788 | 0.5565532907559576 | 0.3550499733321520 | T | T | T |
| 0.6905496585492761 | 0.5249966269652607 | 0.2028776405602427 | T | T | T |
| 0.7161405531784211 | 0.5661746370357182 | 0.9867160087319414 | T | T | T |
| 0.8756900880333826 | 0.5712714452736740 | 0.9842450071106835 | T | T | T |
| 0.8105180266099433 | 0.5529536350841672 | 0.3419880171173186 | T | T | T |
| 0.5755938760500787 | 0.3273574850382787 | 0.3297538285304333 | T | T | T |
| 0.6947012842902340 | 0.3712788005216293 | 0.1893171909278087 | T | T | T |
| 0.7323347078719660 | 0.3270134337866027 | 0.9773839117698008 | T | T | T |
| 0.8873006852009581 | 0.3252316943435281 | 0.9921228602107466 | T | T | T |
| 0.9433091824335788 | 0.3707628787298100 | 0.1942320927309789 | T | T | T |
| 0.9204969940316965 | 0.4441672529716798 | 0.8567772726634970 | T | T | T |
| 0.8007862072266977 | 0.4724626661987580 | 0.7162817251385705 | T | T | T |
| 0.7754368715577076 | 0.4377955393501767 | 0.4916837869112201 | T | T | T |
| 0.6163849609271309 | 0.4305760329919394 | 0.4889253546883312 | T | T | T |
| 0.5682939758897912 | 0.4683813424740490 | 0.7025911118304665 | T | T | T |
| 0.6774121059951305 | 0.4466225088804328 | 0.8536455696983039 | T | T | T |
| 0.9194701923782310 | 0.6780502447911450 | 0.8260229170229482 | T | T | T |
| 0.7666665238821131 | 0.6690008528574817 | 0.4644765750650261 | T | T | T |
| 0.6125232130285158 | 0.6733368089638360 | 0.4891724171068182 | T | T | T |
| 0.5606340573337939 | 0.6264833390983591 | 0.6999261368047912 | T | T | T |
| 0.6746554531827089 | 0.6726226952608294 | 0.8261114625482326 | T | T | T |
| 0.5780308548951666 | 0.9441607337816045 | 0.3582966275465396 | T | T | T |
| 0.6981536480332163 | 0.9720988833656492 | 0.2141039916049271 | T | T | T |
| 0.7215535865479674 | 0.9362763486387558 | 0.9926632500155572 | T | T | T |
| 0.8818099588787445 | 0.9339058194415759 | 0.9947280443870711 | T | T | T |
| 0.9322967045340154 | 0.9706330385640592 | 0.2057560555025752 | T | T | T |
| 0.8225114472329299 | 0.9456456412147888 | 0.3545166294075904 | T | T | T |
| 0.5797650017176691 | 0.1726213696142564 | 0.3297498838798356 | T | T | T |
| 0.6985722393263344 | 0.1295945116208400 | 0.1925846762791898 | T | T | T |
| 0.7334398161566421 | 0.1706731602424212 | 0.9721385673495468 | T | T | T |
| 0.8879673447724969 | 0.1729340360518895 | 0.9830881961661172 | T | T | T |
| 0.9356851433628834 | 0.1288950505668340 | 0.1984352451792437 | T | T | T |
| 0.8192144206665090 | 0.1724659512426417 | 0.3295863048464961 | T | T | T |
| 0.9251195824494581 | 0.0541685197802455 | 0.8558658146064662 | T | T | T |
| 0.8036999901026842 | 0.0259707129168278 | 0.7090060085263821 | T | T | T |



**Structure files (CONTCAR) involved in this work:**

|                    |                    |                    |   |   |   |
|--------------------|--------------------|--------------------|---|---|---|
| 0.7823483793042577 | 0.0654101050526696 | 0.4916725964454842 | T | T | T |
| 0.6220010013617376 | 0.0687544223190785 | 0.4903795273737900 | T | T | T |
| 0.5689713601682381 | 0.0310122320152507 | 0.6996888513021080 | T | T | T |
| 0.6800904102047545 | 0.0527626802390894 | 0.8491985182347476 | T | T | T |
| 0.9238927453426353 | 0.8300438448679989 | 0.8362761744537812 | T | T | T |
| 0.8028940795103329 | 0.8687404838146002 | 0.6953545470819629 | T | T | T |
| 0.7693911158323496 | 0.8266585511109491 | 0.4789963906222592 | T | T | T |
| 0.6148700233414570 | 0.8268305442080293 | 0.4919778473099800 | T | T | T |
| 0.5642439056084060 | 0.8739521457983169 | 0.7000818975353829 | T | T | T |
| 0.6795646829221053 | 0.8317232646868467 | 0.8327866534291732 | T | T | T |
| 0.4230198360329914 | 0.4430664165747512 | 0.6445083802048389 | T | T | T |
| 0.3030927404434043 | 0.4715023181097295 | 0.7890035518007298 | T | T | T |
| 0.2778281956326110 | 0.4379678869124067 | 0.0098512368844209 | T | T | T |
| 0.1200768440566265 | 0.4354950611267260 | 0.0125777890922488 | T | T | T |
| 0.0649244563087644 | 0.4701087518060640 | 0.7993573577837509 | T | T | T |
| 0.1772585011777195 | 0.4445406220883154 | 0.6534826887332087 | T | T | T |
| 0.4176340228670988 | 0.6720115091043535 | 0.6631419779818263 | T | T | T |
| 0.3021778498679153 | 0.6288959555906294 | 0.8056382131092564 | T | T | T |
| 0.2661402715472342 | 0.6702302222294066 | 0.0237201019525718 | T | T | T |
| 0.1121726626632234 | 0.6724479856199170 | 0.0080941769700511 | T | T | T |
| 0.0620564671307683 | 0.6288179734147593 | 0.7952366147746074 | T | T | T |
| 0.1813045819622052 | 0.6695225901867139 | 0.6686495177339228 | T | T | T |
| 0.0789541834803333 | 0.5567890398406825 | 0.1462393676839064 | T | T | T |
| 0.1982904283168582 | 0.5243786352213068 | 0.2883647865396713 | T | T | T |
| 0.2167627375150856 | 0.5610425881286928 | 0.5110948268944512 | T | T | T |
| 0.3758848118174913 | 0.5651148468440008 | 0.5105433261954671 | T | T | T |
| 0.4295070292309294 | 0.5287727335805316 | 0.2992651315343041 | T | T | T |
| 0.3218516299122571 | 0.5533435888758044 | 0.1508182131943060 | T | T | T |
| 0.0860645591665466 | 0.3232592571642531 | 0.1607079503612894 | T | T | T |
| 0.1976320743781406 | 0.3670771590534804 | 0.3070076335660064 | T | T | T |
| 0.2327397665969018 | 0.3283856531950262 | 0.5254222735466784 | T | T | T |
| 0.3869228394635867 | 0.3270822689756619 | 0.5065733304339824 | T | T | T |
| 0.4336128835954793 | 0.3708903468448852 | 0.2924871594421086 | T | T | T |
| 0.3156023064569623 | 0.3287556349351475 | 0.1684288344716716 | T | T | T |
| 0.3584771571569076 | 0.0615776985403034 | 0.7182031435555561 | T | T | T |
| 0.3062168724514880 | 0.0662841420418639 | 0.8978491317056178 | T | T | T |
| 0.2027454414994163 | 0.0463783924834901 | 0.0203776694406425 | T | T | T |
| 0.1006365566376089 | 0.0688816342615238 | 0.8956716890063048 | T | T | T |
| 0.1049146566324993 | 0.0579628166548115 | 0.6983985745035999 | T | T | T |
| 0.2303119296025764 | 0.0313337269444521 | 0.7443396627787812 | T | T | T |
| 0.3596485317714123 | 0.8266708221194746 | 0.7471950319176697 | T | T | T |
| 0.3049590331878044 | 0.8410113388104515 | 0.9229657780431626 | T | T | T |
| 0.1889143827238592 | 0.8517472023739552 | 0.0175167404766791 | T | T | T |
| 0.0846726690678116 | 0.8308700133747903 | 0.9005297619752759 | T | T | T |
| 0.1053801028310245 | 0.8391059669407042 | 0.7050276422833357 | T | T | T |
| 0.2305353782099195 | 0.8560562087552507 | 0.7609755661933095 | T | T | T |
| 0.3232395268841417 | 0.9476950806243702 | 0.8072082913810066 | T | T | T |
| 0.0887698666783452 | 0.9498935357350068 | 0.8130804847026629 | T | T | T |
| 0.4320584007599846 | 0.1272243905220378 | 0.5861521502219684 | T | T | T |
| 0.4184894164913249 | 0.9954546974476116 | 0.5680582351194021 | T | T | T |
| 0.3982360632777723 | 0.8632717607327236 | 0.5648472332699628 | T | T | T |
| 0.2005105208802100 | 0.1294413951413962 | 0.6170083632950992 | T | T | T |
| 0.1828247380711644 | 0.0014170053517420 | 0.5632929742405502 | T | T | T |

**Structure files (CONTCAR) involved in this work:**

|                    |                    |                    |   |   |   |
|--------------------|--------------------|--------------------|---|---|---|
| 0.1978581822859531 | 0.8672939454833217 | 0.5678386860654089 | T | T | T |
| 0.9908941999865365 | 0.0401190886871168 | 0.7883368974529192 | T | T | T |
| 0.9860065759658455 | 0.8681490399187841 | 0.7806748463346580 | T | T | T |
| 0.1426681638307498 | 0.9373445036513683 | 0.2183999614106328 | T | T | T |
| 0.1966548144790236 | 0.9316803487134009 | 0.3971871135204278 | T | T | T |
| 0.2995802113632978 | 0.9480049211590782 | 0.5225640418177502 | T | T | T |
| 0.4016371585101416 | 0.9300536490655720 | 0.3971574293561380 | T | T | T |
| 0.3973030630029626 | 0.9398167664998534 | 0.2002122859773628 | T | T | T |
| 0.2712952014507012 | 0.9668796200332721 | 0.2429373065326803 | T | T | T |
| 0.1409834528998391 | 0.1708791399783595 | 0.2471206580093321 | T | T | T |
| 0.1935869114263085 | 0.1575055893886432 | 0.4235088809925469 | T | T | T |
| 0.3112089273119672 | 0.1476078546382846 | 0.5117352824116639 | T | T | T |
| 0.4173836359092722 | 0.1683802090796303 | 0.3980393746283076 | T | T | T |
| 0.3953672912590827 | 0.1586027822737938 | 0.2037106207557688 | T | T | T |
| 0.2705636738337563 | 0.1433535143352762 | 0.2632410239816930 | T | T | T |
| 0.1787495062244781 | 0.0504680576930349 | 0.3077695265647608 | T | T | T |
| 0.4171256496514674 | 0.0485591390862824 | 0.3122382002311457 | T | T | T |
| 0.0670281690269680 | 0.8704497674037249 | 0.0904453699781892 | T | T | T |
| 0.0830855728679915 | 0.0001389658450859 | 0.0639851479829261 | T | T | T |
| 0.1050668286829071 | 0.1313934862622812 | 0.0656659195632032 | T | T | T |
| 0.3023755370541514 | 0.8683220665797747 | 0.1167464264365085 | T | T | T |
| 0.3208692816575955 | 0.9962491938173691 | 0.0631811292119933 | T | T | T |
| 0.3013510774867519 | 0.1297514127692938 | 0.0696596369653300 | T | T | T |
| 0.5119774293624185 | 0.9546615773664807 | 0.2898777740642635 | T | T | T |
| 0.5166066388063918 | 0.1340907138231403 | 0.2776018920185606 | T | T | T |
| 0.6381973633859855 | 0.5605815929341325 | 0.2784684805252025 | T | T | T |
| 0.6979546980976561 | 0.5724030935529343 | 0.1049247556377182 | T | T | T |
| 0.7959033954764794 | 0.5565981385937292 | 0.9696548952254797 | T | T | T |
| 0.8967637078441404 | 0.5777328250029721 | 0.0993670570424324 | T | T | T |
| 0.8873382002406456 | 0.5452586191882884 | 0.3116987388670855 | T | T | T |
| 0.7625010870135808 | 0.5199615378154874 | 0.2594672633490610 | T | T | T |
| 0.6418731957801631 | 0.3330526508577545 | 0.2623268718669369 | T | T | T |
| 0.6899991763545261 | 0.3359672353842403 | 0.0795524594150055 | T | T | T |
| 0.8097590467326979 | 0.3502732280495367 | 0.9940524967045924 | T | T | T |
| 0.9175782221854929 | 0.3213757741013071 | 0.1045342029233295 | T | T | T |
| 0.9073922146859251 | 0.3474600920085974 | 0.2985915945339011 | T | T | T |
| 0.7688738322391465 | 0.3672606304073605 | 0.2333368468255343 | T | T | T |
| 0.6682091529745062 | 0.4490187821632886 | 0.1761170579541230 | T | T | T |
| 0.9284948436166002 | 0.4468044060766144 | 0.1635819670424553 | T | T | T |
| 0.5688017187031411 | 0.6279065228821037 | 0.4126844137613491 | T | T | T |
| 0.5856084916379144 | 0.4979670270726253 | 0.4385430858779999 | T | T | T |
| 0.5850765941470950 | 0.3640941590605594 | 0.4377454899458311 | T | T | T |
| 0.7920825745437805 | 0.6313555031678371 | 0.3634658139954733 | T | T | T |
| 0.7993840504464749 | 0.5148033641185138 | 0.4535016487378944 | T | T | T |
| 0.8197567164621784 | 0.3841443518287629 | 0.4323244345265160 | T | T | T |
| 0.0132228460907379 | 0.5557011448980297 | 0.2271379948169869 | T | T | T |
| 0.0236272451262059 | 0.3613798356828508 | 0.2115630791553716 | T | T | T |
| 0.8554900485550497 | 0.4341538785782951 | 0.7847704997732995 | T | T | T |
| 0.7940615064015581 | 0.4337445966806115 | 0.6094487173420379 | T | T | T |
| 0.6967626814405591 | 0.4302522940677058 | 0.4705482383400121 | T | T | T |
| 0.5999604195849019 | 0.4288112908488057 | 0.6071648049734194 | T | T | T |
| 0.6033991893618282 | 0.4419236759199214 | 0.8045343936030883 | T | T | T |
| 0.7284111151999786 | 0.4751359681617270 | 0.7684467247902120 | T | T | T |

**Structure files (CONTCAR) involved in this work:**

|                    |                    |                    |   |   |   |
|--------------------|--------------------|--------------------|---|---|---|
| 0.8605515036911070 | 0.6826323192250270 | 0.7461542323361602 | T | T | T |
| 0.8145008075016547 | 0.6430200443889551 | 0.5574254675534676 | T | T | T |
| 0.6900856248699047 | 0.6475893733686743 | 0.4899693655472119 | T | T | T |
| 0.5823208162044567 | 0.6679841637121403 | 0.6006447315632722 | T | T | T |
| 0.5960046096479401 | 0.6593134235725523 | 0.7975780878183392 | T | T | T |
| 0.7203398294392387 | 0.6478531854838764 | 0.7338974318141851 | T | T | T |
| 0.8265208934812707 | 0.5489851507360445 | 0.6914321224734450 | T | T | T |
| 0.5817962405616810 | 0.5481602904641933 | 0.6870361630139724 | T | T | T |
| 0.9306704000896502 | 0.3765058320967768 | 0.9228107506982234 | T | T | T |
| 0.9145509458821587 | 0.5091896761307544 | 0.9285523983513607 | T | T | T |
| 0.8963168714377058 | 0.6404835766502889 | 0.9279944615199743 | T | T | T |
| 0.6998863188134622 | 0.3723330738584336 | 0.8889085731955123 | T | T | T |
| 0.6772297701668238 | 0.4995334821661391 | 0.9457574066512022 | T | T | T |
| 0.6909221242358883 | 0.6333247474718824 | 0.9301780347972758 | T | T | T |
| 0.4889283595576861 | 0.4527235902308757 | 0.7132187425091436 | T | T | T |
| 0.4798247864250495 | 0.6313696039647860 | 0.7125807834199832 | T | T | T |
| 0.6427472115588262 | 0.9377645566499451 | 0.2862289761134041 | T | T | T |
| 0.7002310411574070 | 0.9312588654098075 | 0.1092462455685293 | T | T | T |
| 0.8019998938314103 | 0.9441508475607877 | 0.9803534679393047 | T | T | T |
| 0.9012089154802505 | 0.9289858412275798 | 0.1120568557917373 | T | T | T |
| 0.8977516916553859 | 0.9460667997023778 | 0.3091664072206338 | T | T | T |
| 0.7711294688337740 | 0.9670948977024634 | 0.2662171993752755 | T | T | T |
| 0.6424419341588165 | 0.1714092538492323 | 0.2536629422972330 | T | T | T |
| 0.6974446825726723 | 0.1569644121188674 | 0.0786458109251084 | T | T | T |
| 0.8110361257834943 | 0.1463277046018280 | 0.9789437794300759 | T | T | T |
| 0.9149799758546070 | 0.1680615880664156 | 0.0967928739111859 | T | T | T |
| 0.8966715244934772 | 0.1600774799985863 | 0.2937812921412337 | T | T | T |
| 0.7718576751349184 | 0.1397539961276496 | 0.2417594557623035 | T | T | T |
| 0.6788211305040938 | 0.0502247637055275 | 0.1947517177834234 | T | T | T |
| 0.9180288115322275 | 0.0496823213165365 | 0.1859466150279515 | T | T | T |
| 0.5694430603509839 | 0.8749693206499132 | 0.4218025016018615 | T | T | T |
| 0.5841188718019930 | 0.0062154546595620 | 0.4365880922672523 | T | T | T |
| 0.5998433851657158 | 0.1380364030740073 | 0.4356924580718983 | T | T | T |
| 0.8075465100565478 | 0.8700715116713192 | 0.3943606604373293 | T | T | T |
| 0.8175082797673985 | 0.9980157451643621 | 0.4469712891670528 | T | T | T |
| 0.8072882701284027 | 0.1319009245015133 | 0.4340557244939728 | T | T | T |
| 0.0118523765979743 | 0.9558609291602376 | 0.2175112835824183 | T | T | T |
| 0.0158206614744936 | 0.1370016155824496 | 0.2160281870000589 | T | T | T |
| 0.8599697560595040 | 0.0545924961102963 | 0.7845390765740038 | T | T | T |
| 0.8035018627815639 | 0.0716774784831738 | 0.6085924362609447 | T | T | T |
| 0.7018086530161184 | 0.0570490062669927 | 0.4806343975561541 | T | T | T |
| 0.5997694797108114 | 0.0739499533134311 | 0.6068779244833076 | T | T | T |
| 0.6048736623545627 | 0.0509556374680651 | 0.8041570510585033 | T | T | T |
| 0.7307230796790081 | 0.0292991507031310 | 0.7611695470266977 | T | T | T |
| 0.8590382093333367 | 0.8345914001484612 | 0.7650428707353316 | T | T | T |
| 0.8058173117903454 | 0.8325326305304059 | 0.5867972598837476 | T | T | T |
| 0.6922977363481502 | 0.8522040935751029 | 0.4876863151886640 | T | T | T |
| 0.5886196172954989 | 0.8280055010042459 | 0.6065356479028435 | T | T | T |
| 0.6034175402335539 | 0.8513700669098500 | 0.8008609532778891 | T | T | T |
| 0.7293292224222955 | 0.8580429319502914 | 0.7443217491714140 | T | T | T |
| 0.8190534252816996 | 0.9480682814480511 | 0.6811030936428419 | T | T | T |
| 0.5800627528989797 | 0.9519159973929430 | 0.6739343875002498 | T | T | T |
| 0.9333696858668086 | 0.1270867015140068 | 0.9090828490154674 | T | T | T |

**Structure files (CONTCAR) involved in this work:**

|                    |                    |                    |   |   |   |
|--------------------|--------------------|--------------------|---|---|---|
| 0.9198120772261081 | 0.9971344535933686 | 0.9427595822442874 | T | T | T |
| 0.9069031165460548 | 0.8645349951503751 | 0.9433719015581395 | T | T | T |
| 0.6959376344234791 | 0.1288995599882425 | 0.8846563271796787 | T | T | T |
| 0.6857579320392994 | 0.0020035899184895 | 0.9440484395726602 | T | T | T |
| 0.6975532474310383 | 0.8677804462094587 | 0.9380701232520786 | T | T | T |
| 0.4900434181586357 | 0.0468053964462034 | 0.7155413484692885 | T | T | T |
| 0.4845746009747681 | 0.8633979165254189 | 0.7178698548889131 | T | T | T |
| 0.3577261558104051 | 0.4365280332486438 | 0.7162010360065735 | T | T | T |
| 0.3007521543456472 | 0.4305439709384649 | 0.8940816562823826 | T | T | T |
| 0.1984468270286634 | 0.4571080421633670 | 0.0176083555763529 | T | T | T |
| 0.0936892503515735 | 0.4333344261139605 | 0.8987165935915201 | T | T | T |
| 0.1024044739903490 | 0.4416431336463088 | 0.7002121336820707 | T | T | T |
| 0.2291757094134856 | 0.4689844654183929 | 0.7391266679962847 | T | T | T |
| 0.3556329353737673 | 0.6710497555066862 | 0.7408883770185568 | T | T | T |
| 0.3040635404521566 | 0.6582455034325730 | 0.9183564422339412 | T | T | T |
| 0.1888441552375179 | 0.6455396706493313 | 0.0119002885802062 | T | T | T |
| 0.0844019010413069 | 0.6695374588623673 | 0.8950785649505262 | T | T | T |
| 0.1034901231456628 | 0.6580160091764473 | 0.6997617421909341 | T | T | T |
| 0.2279582395431224 | 0.6382016157830365 | 0.7572147901298342 | T | T | T |
| 0.3226343890284418 | 0.5498461637527307 | 0.8072488388574991 | T | T | T |
| 0.0797139827815383 | 0.5498915716254693 | 0.8107289225369814 | T | T | T |
| 0.4316698022464373 | 0.3753169782139489 | 0.5778627895952236 | T | T | T |
| 0.4169528958166362 | 0.5065927271320355 | 0.5683435290899203 | T | T | T |
| 0.3940336618260011 | 0.6377409561089514 | 0.5583875282916654 | T | T | T |
| 0.1967556019588422 | 0.3702813270360620 | 0.6141154186845563 | T | T | T |
| 0.1771769556341473 | 0.4979726374635346 | 0.5610368320697229 | T | T | T |
| 0.1954128143799993 | 0.6315975495714204 | 0.5628239604767793 | T | T | T |
| 0.9857705420882801 | 0.4545199939187407 | 0.7844133468711503 | T | T | T |
| 0.9829411059927591 | 0.6378142986481108 | 0.7751962162936819 | T | T | T |
| 0.1453625188461477 | 0.5616924671798710 | 0.2140364565981277 | T | T | T |
| 0.1952790615557611 | 0.5644772066364258 | 0.3938830770391518 | T | T | T |
| 0.2965269766857362 | 0.5488817629793296 | 0.5227736523284408 | T | T | T |
| 0.3962085925350759 | 0.5678087401274575 | 0.3936416172576201 | T | T | T |
| 0.3967307790277119 | 0.5565322090380749 | 0.1961283538133163 | T | T | T |
| 0.2720709739866277 | 0.5288841917161420 | 0.2403166794936527 | T | T | T |
| 0.1467259375001563 | 0.3227019005357875 | 0.2410293079012367 | T | T | T |
| 0.1928850388159200 | 0.3416285179395018 | 0.4215175993705605 | T | T | T |
| 0.3096624564606453 | 0.3532057132210569 | 0.5119699941430700 | T | T | T |
| 0.4123021273250039 | 0.3285922530714546 | 0.3915059950443683 | T | T | T |
| 0.3936891654982916 | 0.3432586068705086 | 0.1945067054347265 | T | T | T |
| 0.2728152359792118 | 0.3567183124008786 | 0.2639121185985828 | T | T | T |
| 0.1764984934849120 | 0.4463422386527576 | 0.3016467787006207 | T | T | T |
| 0.4148096428675543 | 0.4490968232810338 | 0.3123843829997039 | T | T | T |
| 0.0679774655121564 | 0.6239858641137973 | 0.0810388369016249 | T | T | T |
| 0.0764240860238274 | 0.4902294681219059 | 0.0778976123162341 | T | T | T |
| 0.1100482667325836 | 0.3614036429260065 | 0.0592179873560481 | T | T | T |
| 0.3012641887089143 | 0.6274539736239529 | 0.1120465347745119 | T | T | T |
| 0.3195471390120823 | 0.4995569273058237 | 0.0595744865341000 | T | T | T |
| 0.2928184229324875 | 0.3676165571687162 | 0.0669676020002346 | T | T | T |
| 0.5087740710706739 | 0.5428152023302198 | 0.2913194440380469 | T | T | T |
| 0.5129268272701869 | 0.3621498789518716 | 0.2711164556805586 | T | T | T |
| 0.4387649719048871 | 0.7489691310157276 | 0.6399474439768661 | T | T | T |
| 0.1968816435973486 | 0.7485955263259032 | 0.6525257087028532 | T | T | T |

**Structure files (CONTCAR) involved in this work:**

|                    |                    |                    |   |   |   |
|--------------------|--------------------|--------------------|---|---|---|
| 0.2695907985219133 | 0.7484086986184180 | 0.0556220967072313 | T | T | T |
| 0.1066616903350128 | 0.7482292227758534 | 0.0508214739100868 | T | T | T |
| 0.0662971412911553 | 0.2472442945796624 | 0.1309541415438977 | T | T | T |
| 0.3031996907538708 | 0.2492453449119015 | 0.1511177154095349 | T | T | T |
| 0.2296659281662994 | 0.2499380911597986 | 0.5557118538525579 | T | T | T |
| 0.3928350324044345 | 0.2507579109242535 | 0.5480095301706822 | T | T | T |
| 0.5586793407528740 | 0.2494896172270361 | 0.3531281744998690 | T | T | T |
| 0.8037972326795993 | 0.2500376082312703 | 0.3470372445963052 | T | T | T |
| 0.7289526117054649 | 0.2492860855232869 | 0.9416350750329827 | T | T | T |
| 0.8924900374112137 | 0.2501962650734782 | 0.9445882417269711 | T | T | T |
| 0.9449507228353413 | 0.7528975063466580 | 0.8574578014714457 | T | T | T |
| 0.6860795314481603 | 0.7518461096090593 | 0.8491313693005921 | T | T | T |
| 0.7729349879087991 | 0.7485680356740453 | 0.4448056337439850 | T | T | T |
| 0.6091055077464892 | 0.7504244466200588 | 0.4505728712008069 | T | T | T |
| 0.9450808347634045 | 0.5006695694284109 | 0.5251733886997613 | T | T | T |
| 0.8205920689472718 | 0.3329601425963136 | 0.3232862720731310 | T | T | T |
| 0.7997748241893330 | 0.6355400427757525 | 0.6909092417878541 | T | T | T |
| 0.9240944184713588 | 0.5290020910233368 | 0.1966674815483234 | T | T | T |
| 0.9331634546882169 | 0.4075320939253566 | 0.4339841932881414 | T | T | T |
| 0.8713365948556029 | 0.5563450690086421 | 0.5537522953748567 | T | T | T |
| 0.9849111491135761 | 0.6438918212938372 | 0.3031574382636911 | T | T | T |
| 0.0028178247742361 | 0.5717729090035938 | 0.3807441424985862 | T | T | T |
| 0.9687281802677784 | 0.4865707464385873 | 0.5856031828456257 | T | T | T |
| 0.0700273330852291 | 0.6178956782912938 | 0.3229080644150315 | T | T | T |
| 0.0589378746363960 | 0.4373794501550614 | 0.4691015365588826 | T | T | T |
| 0.0489201066892945 | 0.3522709692248120 | 0.4117072800768554 | T | T | T |
| 0.0182599285452527 | 0.6009876092425647 | 0.3153300911405009 | T | T | T |
| 0.0257553201637155 | 0.3952131025013746 | 0.4500282564736074 | T | T | T |

**Figure S17 ZnPd-TS**

Si O Al Pd Zn H C

1.0000000000000000

20.0219999999999985 0.0000000000000000 0.0000000000000000

0.0000000000000000 19.8990000000000009 0.0000000000000000

0.0000000000000000 0.0000000000000000 13.3829999999999991

93 193 3 1 1 6 2

Selective dynamics

Direct

|                    |                    |                    |   |   |   |
|--------------------|--------------------|--------------------|---|---|---|
| 0.4241333936805568 | 0.0566965949388104 | 0.6466758775319218 | T | T | T |
| 0.3037771150239818 | 0.0255906681801306 | 0.7900012024125296 | T | T | T |
| 0.2828799416683996 | 0.0590281006368185 | 0.0120980007639117 | T | T | T |
| 0.1234942596338956 | 0.0610129655917610 | 0.0110119305634804 | T | T | T |
| 0.0710011265174686 | 0.0284556044742638 | 0.7995410247543885 | T | T | T |
| 0.1793352753010015 | 0.0547430760562468 | 0.6527406949949836 | T | T | T |
| 0.4208653727084360 | 0.8263849475249138 | 0.6664901319666615 | T | T | T |
| 0.3039835280636011 | 0.8670697184880921 | 0.8083120455933249 | T | T | T |
| 0.2670847899511237 | 0.8263676236027495 | 0.0270179148985513 | T | T | T |
| 0.1125308827967803 | 0.8242802887339713 | 0.0135173944389328 | T | T | T |
| 0.0664007329891144 | 0.8715781305021810 | 0.7995261595911104 | T | T | T |
| 0.1823431516424361 | 0.8270208345689679 | 0.6698225980099484 | T | T | T |
| 0.0773618150838536 | 0.9406093409717592 | 0.1470949599188876 | T | T | T |
| 0.1978511784370783 | 0.9716589293220044 | 0.2896941617267916 | T | T | T |
| 0.2191199574982971 | 0.9370140065791918 | 0.5119921734353657 | T | T | T |
| 0.3786413663731347 | 0.9346915997396387 | 0.5122453492404749 | T | T | T |

**Structure files (CONTCAR) involved in this work:**

|                    |                    |                    |   |   |   |
|--------------------|--------------------|--------------------|---|---|---|
| 0.4322935301536418 | 0.9683394772273483 | 0.3003344616354213 | T | T | T |
| 0.3227482555223472 | 0.9422885597883458 | 0.1535644547770832 | T | T | T |
| 0.0816761513311768 | 0.1713075265606998 | 0.1637571317328967 | T | T | T |
| 0.1971262884247768 | 0.1298196371121089 | 0.3072610643536883 | T | T | T |
| 0.2334433100520690 | 0.1709576965005919 | 0.5247672736562650 | T | T | T |
| 0.3880849327903884 | 0.1730949009312407 | 0.5110378393999113 | T | T | T |
| 0.4370054285825123 | 0.1267359262243289 | 0.2982614615229116 | T | T | T |
| 0.3188382781986858 | 0.1691561124995566 | 0.1703100237404555 | T | T | T |
| 0.5770979494054718 | 0.5561256406345987 | 0.3541491367725146 | T | T | T |
| 0.6917914532980447 | 0.5248369555253121 | 0.2021547634487029 | T | T | T |
| 0.7164779017078871 | 0.5667463034144649 | 0.9856633983218399 | T | T | T |
| 0.8747987263706319 | 0.5715388076236165 | 0.9868870033014301 | T | T | T |
| 0.8113597302974073 | 0.5525787803773420 | 0.3436563300839438 | T | T | T |
| 0.5748320237346338 | 0.3276379163861780 | 0.3311695076027233 | T | T | T |
| 0.6958273151675829 | 0.3708292624200398 | 0.1923247081445102 | T | T | T |
| 0.7303780052095137 | 0.3261614336118368 | 0.9788989845249519 | T | T | T |
| 0.8848384384383654 | 0.3252335788059905 | 0.9934341220932443 | T | T | T |
| 0.9403371782769848 | 0.3735433898261504 | 0.1903308285028211 | T | T | T |
| 0.9210769029047817 | 0.4443512177810825 | 0.8609607517825655 | T | T | T |
| 0.8003634913314260 | 0.4714163874983614 | 0.7206042405570277 | T | T | T |
| 0.7759980024864340 | 0.4366762504770905 | 0.4950052575358153 | T | T | T |
| 0.6177472892071808 | 0.4297361207633322 | 0.4894336061301380 | T | T | T |
| 0.5679185222856877 | 0.4691483688883334 | 0.7022131883649754 | T | T | T |
| 0.6750291957798545 | 0.4463064611845747 | 0.8563678702798930 | T | T | T |
| 0.9203523715658429 | 0.6775690554230289 | 0.8295230313183661 | T | T | T |
| 0.7679778139194759 | 0.6688979181650729 | 0.4668005932501374 | T | T | T |
| 0.6136491369191311 | 0.6731826997140271 | 0.4889816812801682 | T | T | T |
| 0.5604493252131882 | 0.6271880064669126 | 0.6994343718831193 | T | T | T |
| 0.6737028595929433 | 0.6731844640632877 | 0.8271686709153254 | T | T | T |
| 0.5779755065303499 | 0.9443315004024923 | 0.3594103487119920 | T | T | T |
| 0.6990495909844718 | 0.9726234326150694 | 0.2161568517689879 | T | T | T |
| 0.7213718239785415 | 0.9363453981999234 | 0.9941651897097812 | T | T | T |
| 0.8816324876049866 | 0.9336971357041545 | 0.9959678225868780 | T | T | T |
| 0.9332710654109296 | 0.9701282041091769 | 0.2059084964883642 | T | T | T |
| 0.8239804577079821 | 0.9455813585360333 | 0.3561766042641986 | T | T | T |
| 0.5800483461903246 | 0.1727531622664504 | 0.3306916764872824 | T | T | T |
| 0.6991831311090653 | 0.1308823165459842 | 0.1936742741719778 | T | T | T |
| 0.7330673305273082 | 0.1702427134589193 | 0.9724714591623754 | T | T | T |
| 0.8876661586216210 | 0.1729483643463237 | 0.9844906383300343 | T | T | T |
| 0.9365790553707942 | 0.1283824151770642 | 0.1988459577274091 | T | T | T |
| 0.8207021130273700 | 0.1726252066812863 | 0.3314031206574598 | T | T | T |
| 0.9252208053051140 | 0.0542293022306873 | 0.8575562026661209 | T | T | T |
| 0.8041582837565311 | 0.0258138601255868 | 0.7103624414726629 | T | T | T |
| 0.7824079399393125 | 0.0650326910362900 | 0.4927971131268399 | T | T | T |
| 0.6223119463409970 | 0.0685781930858053 | 0.4909953267798881 | T | T | T |
| 0.5692953657502630 | 0.0307518347397121 | 0.6995237515012714 | T | T | T |
| 0.6800709792352996 | 0.0521869760619640 | 0.8497739976489594 | T | T | T |
| 0.9243582234932177 | 0.8297483878233627 | 0.8376652749306844 | T | T | T |
| 0.8033392067374121 | 0.8688542918928480 | 0.6975828046624195 | T | T | T |
| 0.7708155965121315 | 0.8266066665294857 | 0.4804268240179292 | T | T | T |
| 0.6161914079405313 | 0.8266288724294367 | 0.4919546635231908 | T | T | T |
| 0.5650131788438705 | 0.8739320696029123 | 0.6994422004449277 | T | T | T |
| 0.6793841334204226 | 0.8322742724907127 | 0.8341288465391419 | T | T | T |

**Structure files (CONTCAR) involved in this work:**

|                    |                    |                    |   |   |   |
|--------------------|--------------------|--------------------|---|---|---|
| 0.4234604193924323 | 0.4438831486760739 | 0.6395715768927750 | T | T | T |
| 0.3032094236621409 | 0.4715235299100733 | 0.7847865658140820 | T | T | T |
| 0.2815441068758853 | 0.4361771486279034 | 0.0042424434675567 | T | T | T |
| 0.1239234413653702 | 0.4350809089963668 | 0.0085496207960393 | T | T | T |
| 0.0655650234689875 | 0.4694383705667451 | 0.7985559905721301 | T | T | T |
| 0.1766843829604357 | 0.4445169170565494 | 0.6510304774692897 | T | T | T |
| 0.4178121614103599 | 0.6724015662444787 | 0.6602068555191355 | T | T | T |
| 0.3015687142975498 | 0.6290671551593355 | 0.8020752558197137 | T | T | T |
| 0.2671685915514818 | 0.6694700806152375 | 0.0211232014307396 | T | T | T |
| 0.1128151416324101 | 0.6703688935960970 | 0.0080041422929638 | T | T | T |
| 0.0625546306139824 | 0.6283083138863977 | 0.7951834948530326 | T | T | T |
| 0.1801847631905555 | 0.6686658064022880 | 0.6652219097677524 | T | T | T |
| 0.0760877438690199 | 0.5548727718973810 | 0.1471932139097017 | T | T | T |
| 0.1988106740680340 | 0.5248297817795681 | 0.2834270768834017 | T | T | T |
| 0.2182277486320148 | 0.5604727348729689 | 0.5088450253134834 | T | T | T |
| 0.3763954380524542 | 0.5656433197457166 | 0.5081719316615302 | T | T | T |
| 0.4287112881854455 | 0.5276199187036612 | 0.2987866544684413 | T | T | T |
| 0.3237965336704277 | 0.5514123074365475 | 0.1455595590659078 | T | T | T |
| 0.0854881571032952 | 0.3243862195025011 | 0.1556005800217622 | T | T | T |
| 0.1966533213184461 | 0.3671784408093773 | 0.3044152598177870 | T | T | T |
| 0.2321604048750180 | 0.3282728491157010 | 0.5236838795791321 | T | T | T |
| 0.3863323455958955 | 0.3266054206885676 | 0.5055698066308268 | T | T | T |
| 0.4326447210909075 | 0.3700647711563338 | 0.2922099339180505 | T | T | T |
| 0.3158164050160576 | 0.3275295811176819 | 0.1645219087880840 | T | T | T |
| 0.3586120180400599 | 0.0601550098700321 | 0.7174916190996794 | T | T | T |
| 0.3045732285630496 | 0.0653828057979484 | 0.8958118966824116 | T | T | T |
| 0.2029293129138504 | 0.0466274653279834 | 0.0224521189677917 | T | T | T |
| 0.1021644314350240 | 0.0680511941056335 | 0.8949100094127296 | T | T | T |
| 0.1041015853745361 | 0.0575396332165535 | 0.6975619452111458 | T | T | T |
| 0.2299075517454213 | 0.0310415057670576 | 0.7409680591924618 | T | T | T |
| 0.3605382064599398 | 0.8263295268166861 | 0.7470297179140760 | T | T | T |
| 0.3053605642375091 | 0.8403893185127973 | 0.9223533128671022 | T | T | T |
| 0.1896727399785884 | 0.8505300731085494 | 0.0172396526862439 | T | T | T |
| 0.0856017044671880 | 0.8301203530042252 | 0.8998449704027673 | T | T | T |
| 0.1051164931184916 | 0.8386924064949901 | 0.7040868874103697 | T | T | T |
| 0.2307211719694048 | 0.8531429088208945 | 0.7597318625154255 | T | T | T |
| 0.3215294491519846 | 0.9466731923234568 | 0.8055368147614063 | T | T | T |
| 0.0891804148716791 | 0.9493011608258641 | 0.8123630749539107 | T | T | T |
| 0.4318903054260427 | 0.1272810557055131 | 0.5866596105563442 | T | T | T |
| 0.4187724072957582 | 0.9956913481950582 | 0.5660469292634125 | T | T | T |
| 0.3976651384438919 | 0.8636927453351064 | 0.5643524427316898 | T | T | T |
| 0.1987283270843212 | 0.1294162321257506 | 0.6145478933702986 | T | T | T |
| 0.1812659332373386 | 0.0014436524474128 | 0.5606849181414243 | T | T | T |
| 0.1975963712475116 | 0.8675864744377352 | 0.5670438763979516 | T | T | T |
| 0.9911070321704523 | 0.0398386507668646 | 0.7905035900572858 | T | T | T |
| 0.9861765853497728 | 0.8678640734464932 | 0.7813986273667177 | T | T | T |
| 0.1435281199853257 | 0.9366431388188998 | 0.2167683424375241 | T | T | T |
| 0.1976625130875738 | 0.9316608106173292 | 0.3954509660646737 | T | T | T |
| 0.2991100953114104 | 0.9488095076823532 | 0.5231857844039950 | T | T | T |
| 0.4002277085240806 | 0.9297138896334727 | 0.3960360447352602 | T | T | T |
| 0.3978520333902972 | 0.9399609318473882 | 0.1989443720823939 | T | T | T |
| 0.2718716923278170 | 0.9672401450717401 | 0.2408070856104430 | T | T | T |
| 0.1422675480490950 | 0.1713627082739619 | 0.2439077631483171 | T | T | T |

**Structure files (CONTCAR) involved in this work:**

|                    |                    |                    |   |   |   |
|--------------------|--------------------|--------------------|---|---|---|
| 0.1941940243842860 | 0.1574354357793791 | 0.4208682934383687 | T | T | T |
| 0.3108128237272029 | 0.1473389026205277 | 0.5125356826007474 | T | T | T |
| 0.4168621432575936 | 0.1679882913830094 | 0.3984157243914974 | T | T | T |
| 0.3964114540145127 | 0.1583360438468188 | 0.2035701997758321 | T | T | T |
| 0.2713529637450277 | 0.1424942683425608 | 0.2611264020203570 | T | T | T |
| 0.1787546036552184 | 0.0503394913698498 | 0.3054954744955218 | T | T | T |
| 0.4172983267851575 | 0.0482487101551013 | 0.3123093826791053 | T | T | T |
| 0.0678003961308732 | 0.8694009571565533 | 0.0892384761360434 | T | T | T |
| 0.0831311704897733 | 0.9996430649565843 | 0.0633541594377701 | T | T | T |
| 0.1039555106251434 | 0.1312613457584860 | 0.0640008827625202 | T | T | T |
| 0.3031037194285914 | 0.8674038186526054 | 0.1164066653795371 | T | T | T |
| 0.3212303646754576 | 0.9947671175918787 | 0.0603970659692995 | T | T | T |
| 0.3035242705423971 | 0.1282571922338985 | 0.0680437112939157 | T | T | T |
| 0.5117659912380258 | 0.9539957684526473 | 0.2911367383251948 | T | T | T |
| 0.5169431625518238 | 0.1337762747305626 | 0.2793794428574359 | T | T | T |
| 0.6366345653041563 | 0.5606128176987006 | 0.2729704338600593 | T | T | T |
| 0.7021413767101539 | 0.5722045674573399 | 0.1049866272090870 | T | T | T |
| 0.7955723789394619 | 0.5577443660554633 | 0.9618966108184098 | T | T | T |
| 0.8895973709654976 | 0.5774332446591380 | 0.1036925784553498 | T | T | T |
| 0.8881868305331371 | 0.5435940193660795 | 0.3155336517949957 | T | T | T |
| 0.7616317842253432 | 0.5196561961652191 | 0.2639276639321002 | T | T | T |
| 0.6418539870077312 | 0.3346747284261465 | 0.2656901026922489 | T | T | T |
| 0.6916685140997673 | 0.3327309969030309 | 0.0846340181511115 | T | T | T |
| 0.8077127571943238 | 0.3511123629771392 | 0.9896861496696089 | T | T | T |
| 0.9104423723966434 | 0.3204095368155028 | 0.1088123034092274 | T | T | T |
| 0.9107039528449800 | 0.3519690749178135 | 0.3021811240883903 | T | T | T |
| 0.7694991167282187 | 0.3669460673882388 | 0.2388471999874487 | T | T | T |
| 0.6707887233314239 | 0.4485292549372979 | 0.1743779898998511 | T | T | T |
| 0.9193605671281844 | 0.4477348953898175 | 0.1615771725453496 | T | T | T |
| 0.5706026062421750 | 0.6275001498143418 | 0.4119805057695575 | T | T | T |
| 0.5914327439754793 | 0.4982237649984991 | 0.4372583382251853 | T | T | T |
| 0.5831970713011255 | 0.3645620181260538 | 0.4393769939167178 | T | T | T |
| 0.7938751918328996 | 0.6309303365686683 | 0.3665686208830239 | T | T | T |
| 0.7983779149549867 | 0.5139657521643001 | 0.4560177373991532 | T | T | T |
| 0.8240261300488307 | 0.3847351916684632 | 0.4364706011621877 | T | T | T |
| 0.0121574010613542 | 0.5479737901569741 | 0.2194350310061104 | T | T | T |
| 0.0211997420057139 | 0.3644949500935850 | 0.1980875274112337 | T | T | T |
| 0.8563560506323655 | 0.4340033672934502 | 0.7877158946044601 | T | T | T |
| 0.7942071583643587 | 0.4331313644698226 | 0.6128015263068322 | T | T | T |
| 0.6984180662731702 | 0.4243540685635851 | 0.4719250545714005 | T | T | T |
| 0.6014712584387664 | 0.4299706834843560 | 0.6077071902635139 | T | T | T |
| 0.6015770528258263 | 0.4429141981887909 | 0.8053415399011860 | T | T | T |
| 0.7278692352583523 | 0.4721984208440232 | 0.7716819663316631 | T | T | T |
| 0.8603381256968969 | 0.6814927449646542 | 0.7511197707200346 | T | T | T |
| 0.8152203211761390 | 0.6424798795004752 | 0.5608816160706003 | T | T | T |
| 0.6913129436195597 | 0.6475023965934052 | 0.4912928564431689 | T | T | T |
| 0.5828188314675693 | 0.6681911014957719 | 0.6000674079267377 | T | T | T |
| 0.5951974325514127 | 0.6604006131497002 | 0.7973131284718938 | T | T | T |
| 0.7197054367189457 | 0.6476632760928005 | 0.7356501237948607 | T | T | T |
| 0.8251504082281994 | 0.5482205089459394 | 0.6950856626202627 | T | T | T |
| 0.5817550775747423 | 0.5488520582794537 | 0.6872541968078805 | T | T | T |
| 0.9306487705652923 | 0.3766587824949057 | 0.9277155662593377 | T | T | T |
| 0.9151532259051384 | 0.5095408393223433 | 0.9319013035282797 | T | T | T |



**Structure files (CONTCAR) involved in this work:**

|                    |                    |                    |   |   |   |
|--------------------|--------------------|--------------------|---|---|---|
| 0.8987135116264552 | 0.6405291277872217 | 0.9324338288052587 | T | T | T |
| 0.6941703682263577 | 0.3716490100582692 | 0.8940940753663390 | T | T | T |
| 0.6759674328179754 | 0.5003778491071554 | 0.9467798999825772 | T | T | T |
| 0.6888584560279736 | 0.6339785156635597 | 0.9316461635412470 | T | T | T |
| 0.4885827683668392 | 0.4529285531082614 | 0.7102094577943747 | T | T | T |
| 0.4796296769471863 | 0.6318916856673170 | 0.7110077279249805 | T | T | T |
| 0.6428538697601430 | 0.9390375130823433 | 0.2876086208335323 | T | T | T |
| 0.7003889442830994 | 0.9321757405757622 | 0.1109474721981012 | T | T | T |
| 0.8017864058495786 | 0.9436268361126965 | 0.9811373899970561 | T | T | T |
| 0.9007234140437014 | 0.9284681797166121 | 0.1133794562723054 | T | T | T |
| 0.8990067505405679 | 0.9470869547526891 | 0.3103017244747898 | T | T | T |
| 0.7718572032272292 | 0.9659917294593600 | 0.2682981836359516 | T | T | T |
| 0.6422856390473956 | 0.1722801072883408 | 0.2537767372408857 | T | T | T |
| 0.6971350510277864 | 0.1566198232570272 | 0.0790001659283770 | T | T | T |
| 0.8107699706314119 | 0.1462792940840608 | 0.9797486296747810 | T | T | T |
| 0.9145522267973132 | 0.1682203188642423 | 0.0983114134171561 | T | T | T |
| 0.8975790210212589 | 0.1576660808043989 | 0.2956037855294362 | T | T | T |
| 0.7722171388770734 | 0.1437916402727143 | 0.2422704180057291 | T | T | T |
| 0.6812621350818400 | 0.0511996205111889 | 0.1979635738432265 | T | T | T |
| 0.9200663524618888 | 0.0492056186789584 | 0.1845708010861113 | T | T | T |
| 0.5703592637199139 | 0.8749030750049456 | 0.4226243807210937 | T | T | T |
| 0.5833757644426012 | 0.0064936969009007 | 0.4377450966209015 | T | T | T |
| 0.6011993926798790 | 0.1381517606312939 | 0.4361554469427526 | T | T | T |
| 0.8101132391828220 | 0.8699843578608031 | 0.3969450663874983 | T | T | T |
| 0.8185967827144379 | 0.9982198023986956 | 0.4483033340358206 | T | T | T |
| 0.8065318757270302 | 0.1318287563320597 | 0.4349078897775343 | T | T | T |
| 0.0126331626010818 | 0.9544354047031052 | 0.2167663587534821 | T | T | T |
| 0.0165215744513403 | 0.1380128600168218 | 0.2162337380389455 | T | T | T |
| 0.8602617712741640 | 0.0550667340921920 | 0.7856289497030371 | T | T | T |
| 0.8032492799442345 | 0.0715525751876712 | 0.6098403339145789 | T | T | T |
| 0.7019929927831348 | 0.0557558797529575 | 0.4811458984559701 | T | T | T |
| 0.6003480116586856 | 0.0743464583488207 | 0.6075456907055018 | T | T | T |
| 0.6049212033465521 | 0.0503117837761766 | 0.8043849303454411 | T | T | T |
| 0.7310841025256087 | 0.0284072003832656 | 0.7624008322537318 | T | T | T |
| 0.8591281708920905 | 0.8339129323601953 | 0.7669641365499379 | T | T | T |
| 0.8058010903086716 | 0.8324465855884047 | 0.5892051092741627 | T | T | T |
| 0.6935922607733898 | 0.8519952315350416 | 0.4866332381648770 | T | T | T |
| 0.5905727679549539 | 0.8276325145041397 | 0.6069059200196103 | T | T | T |
| 0.6033996138398556 | 0.8518411483099976 | 0.8011700036443692 | T | T | T |
| 0.7297102548939148 | 0.8591597139289007 | 0.7467746437763152 | T | T | T |
| 0.8203386417317490 | 0.9480080765830065 | 0.6828242983039972 | T | T | T |
| 0.5809444615474975 | 0.9518558847390088 | 0.6729408661846182 | T | T | T |
| 0.9333688189419101 | 0.1273152023023936 | 0.9106167343757242 | T | T | T |
| 0.9192167874100545 | 0.9974364817005179 | 0.9445819533234486 | T | T | T |
| 0.9073673449200926 | 0.8647198617598113 | 0.9443795536834769 | T | T | T |
| 0.6958774601572596 | 0.1284151959921909 | 0.8848339789615642 | T | T | T |
| 0.6855723110653180 | 0.0019297055331366 | 0.9451275212895247 | T | T | T |
| 0.6966328388345249 | 0.8678424041590483 | 0.9401287860549010 | T | T | T |
| 0.4902299695805557 | 0.0461471281804738 | 0.7146918636966351 | T | T | T |
| 0.4852193747011908 | 0.8635365146175700 | 0.7158269091669933 | T | T | T |
| 0.3568614557829899 | 0.4386746751306955 | 0.7083488481680522 | T | T | T |
| 0.3046147905413409 | 0.4288404532708487 | 0.8883285879969455 | T | T | T |
| 0.2026092372283161 | 0.4554953177632291 | 0.0104555209613306 | T | T | T |

**Structure files (CONTCAR) involved in this work:**

|                    |                    |                    |   |   |   |
|--------------------|--------------------|--------------------|---|---|---|
| 0.0966231791427733 | 0.4309882438321485 | 0.8945719291093736 | T | T | T |
| 0.1010102583321385 | 0.4428003014465973 | 0.6960401101955879 | T | T | T |
| 0.2283399897083917 | 0.4681042214065450 | 0.7375667190064678 | T | T | T |
| 0.3549602362805580 | 0.6706208283688575 | 0.7361687815464761 | T | T | T |
| 0.3036852910144197 | 0.6595080820127888 | 0.9139767510690929 | T | T | T |
| 0.1900822289618558 | 0.6445246622872520 | 0.0114309921701517 | T | T | T |
| 0.0867229382130068 | 0.6693553149177508 | 0.8933440323079934 | T | T | T |
| 0.1026509888416916 | 0.6562433937865704 | 0.6973174404839538 | T | T | T |
| 0.2274543829874979 | 0.6380433283555211 | 0.7534745421459526 | T | T | T |
| 0.3215959096027664 | 0.5498850663500920 | 0.8050018659243627 | T | T | T |
| 0.0794630240681060 | 0.5491441227906869 | 0.8109615703007961 | T | T | T |
| 0.4320625309821330 | 0.3755597579099045 | 0.5742740718997360 | T | T | T |
| 0.4197335813917110 | 0.5072451002754829 | 0.5627568535690137 | T | T | T |
| 0.3958726887810503 | 0.6383174961113005 | 0.5545132322000629 | T | T | T |
| 0.1951339594528136 | 0.3698552947106895 | 0.6118853650662822 | T | T | T |
| 0.1776662125269940 | 0.4972677671680075 | 0.5575170909224301 | T | T | T |
| 0.1943799094585524 | 0.6306474262114712 | 0.5593908245817857 | T | T | T |
| 0.9858753370447997 | 0.4533211250155684 | 0.7865712647695903 | T | T | T |
| 0.9831740954303799 | 0.6375366598220013 | 0.7766016706228915 | T | T | T |
| 0.1441072717875134 | 0.5623758466904168 | 0.2142117814432399 | T | T | T |
| 0.2003720167268214 | 0.5637769521456367 | 0.3905927693375262 | T | T | T |
| 0.2976503215666637 | 0.5490450730467906 | 0.5266903155249691 | T | T | T |
| 0.3930422565711292 | 0.5679823020780631 | 0.3899819898057745 | T | T | T |
| 0.3981453073717695 | 0.5541518331507992 | 0.1936055648542363 | T | T | T |
| 0.2719661447956642 | 0.5272227325664125 | 0.2323608219997954 | T | T | T |
| 0.1414266565077972 | 0.3246625608799953 | 0.2433912457907047 | T | T | T |
| 0.1933037747766550 | 0.3417692991818027 | 0.4191398538673005 | T | T | T |
| 0.3092258338532754 | 0.3530636963293837 | 0.5120055549900233 | T | T | T |
| 0.4107815319443751 | 0.3267723573391136 | 0.3900071749384781 | T | T | T |
| 0.3932458843320665 | 0.3428618667796734 | 0.1937052000301369 | T | T | T |
| 0.2703616999972565 | 0.3547208169610694 | 0.2575488154726728 | T | T | T |
| 0.1773404896374953 | 0.4466845696934588 | 0.3001928807942796 | T | T | T |
| 0.4136461908594681 | 0.4480459676072548 | 0.3135655136396717 | T | T | T |
| 0.0680494292974325 | 0.6219199953941599 | 0.0781789091318207 | T | T | T |
| 0.0823965515103482 | 0.4900950579300867 | 0.0725406120674987 | T | T | T |
| 0.1147367076786345 | 0.3605062553041253 | 0.0560077044239999 | T | T | T |
| 0.3048706696858427 | 0.6257477565901856 | 0.1060664574449920 | T | T | T |
| 0.3236953499044827 | 0.4972780565979359 | 0.0545898547244700 | T | T | T |
| 0.2957497240963577 | 0.3655903132265169 | 0.0613696050422693 | T | T | T |
| 0.5082320326274804 | 0.5409052957064507 | 0.2956763542334071 | T | T | T |
| 0.5121743896804597 | 0.3616548768286205 | 0.2716463599568751 | T | T | T |
| 0.4391239047109339 | 0.7493946548334154 | 0.6379041526414578 | T | T | T |
| 0.1950948178842306 | 0.7478027250667431 | 0.6481663156972278 | T | T | T |
| 0.2712054572623983 | 0.7473431581972559 | 0.0551919075965664 | T | T | T |
| 0.1077784067051229 | 0.7467123847097792 | 0.0498631544932804 | T | T | T |
| 0.0659080017788615 | 0.2477600513154766 | 0.1289245786666310 | T | T | T |
| 0.3041963561222851 | 0.2478831540766878 | 0.1477527387455173 | T | T | T |
| 0.2287984494333630 | 0.2498085044647780 | 0.5538486033207491 | T | T | T |
| 0.3923268876589046 | 0.2506184604030904 | 0.5483366557647279 | T | T | T |
| 0.5587324435216403 | 0.2495633815395684 | 0.3543691218052885 | T | T | T |
| 0.8092753337124156 | 0.2507240526790716 | 0.3515511659927985 | T | T | T |
| 0.7278389066361214 | 0.2487805230076592 | 0.9415629967567285 | T | T | T |
| 0.8916081268657082 | 0.2503441744461010 | 0.9459661176997393 | T | T | T |

**Structure files (CONTCAR) involved in this work:**

|                    |                    |                    |   |   |   |
|--------------------|--------------------|--------------------|---|---|---|
| 0.9456962906578225 | 0.7527786734030041 | 0.8591272597124961 | T | T | T |
| 0.6859020440104163 | 0.7523297155157691 | 0.8496245393655889 | T | T | T |
| 0.7748752840384437 | 0.7482973540376132 | 0.4471948871674604 | T | T | T |
| 0.6104968094939655 | 0.7502647072979037 | 0.4502045019724035 | T | T | T |
| 0.9376193430565393 | 0.4897767363703142 | 0.5402385840893933 | T | T | T |
| 0.8231729430152813 | 0.3334843133352268 | 0.3260792122772512 | T | T | T |
| 0.7995475379522720 | 0.6353260117814802 | 0.6949563149157615 | T | T | T |
| 0.9268022288027461 | 0.5307657594101218 | 0.1978988772011559 | T | T | T |
| 0.9300344555086968 | 0.4172730700002019 | 0.4258079498248025 | T | T | T |
| 0.8673315090570709 | 0.5546860278788325 | 0.5569899711084287 | T | T | T |
| 0.9952557119906468 | 0.6186764920821480 | 0.3642634678220126 | T | T | T |
| 0.0105476242070124 | 0.5500346278054532 | 0.4571688859689093 | T | T | T |
| 0.9537351804437328 | 0.4706166548273507 | 0.6031290131188244 | T | T | T |
| 0.0824670953930334 | 0.5876696042475834 | 0.3849905874308478 | T | T | T |
| 0.0526209549009529 | 0.4474753501387304 | 0.4722486641187478 | T | T | T |
| 0.0462521877193930 | 0.4055569947226435 | 0.3450629614456486 | T | T | T |
| 0.0291869336078069 | 0.5829830033917642 | 0.3986669682494273 | T | T | T |
| 0.0222321351650371 | 0.4275818008971199 | 0.4108600678419829 | T | T | T |

**Figure S17 ZnPd-FS**

Si O Al Pd Zn H C

|                     |                     |                     |   |   |   |   |
|---------------------|---------------------|---------------------|---|---|---|---|
| 1.0000000000000000  |                     |                     |   |   |   |   |
| 20.0219999999999985 | 0.0000000000000000  | 0.0000000000000000  |   |   |   |   |
| 0.0000000000000000  | 19.8990000000000009 | 0.0000000000000000  |   |   |   |   |
| 0.0000000000000000  | 0.0000000000000000  | 13.3829999999999991 |   |   |   |   |
| 93                  | 193                 | 3                   | 1 | 1 | 6 | 2 |

Selective dynamics

Direct

|                    |                    |                    |   |   |   |
|--------------------|--------------------|--------------------|---|---|---|
| 0.4238459265996131 | 0.0575645296919481 | 0.6466780836718798 | T | T | T |
| 0.3049899830556511 | 0.0267609149308747 | 0.7916131357069971 | T | T | T |
| 0.2829035484374978 | 0.0590465944143720 | 0.0133202090739601 | T | T | T |
| 0.1233776226079829 | 0.0614005205834960 | 0.0107069448797361 | T | T | T |
| 0.0697081713970722 | 0.0292012390677860 | 0.7993881447477627 | T | T | T |
| 0.1803752446690632 | 0.0560196438753118 | 0.6565193974925423 | T | T | T |
| 0.4208456583464164 | 0.8267066179663095 | 0.6677275475611621 | T | T | T |
| 0.3046604906798430 | 0.8679396028853166 | 0.8090877569008093 | T | T | T |
| 0.2675456930057464 | 0.8277628686325786 | 0.0276042914356831 | T | T | T |
| 0.1132215349588973 | 0.8251000250215511 | 0.0131525406825612 | T | T | T |
| 0.0662520694760252 | 0.8720253984235190 | 0.7995447954726841 | T | T | T |
| 0.1829201892705461 | 0.8271797261463296 | 0.6715181481673447 | T | T | T |
| 0.0780121551018140 | 0.9406413554811650 | 0.1477113428742628 | T | T | T |
| 0.1971443115760000 | 0.9713198525221169 | 0.2918191561800068 | T | T | T |
| 0.2192811422128180 | 0.9374149792241143 | 0.5137363356567506 | T | T | T |
| 0.3791183543705197 | 0.9347741703327750 | 0.5123670154986837 | T | T | T |
| 0.4336464735389697 | 0.9681350541275064 | 0.3008842319875470 | T | T | T |
| 0.3222787229539470 | 0.9420795366134995 | 0.1576549118584626 | T | T | T |
| 0.0826905691953277 | 0.1717498928522777 | 0.1641145308748007 | T | T | T |
| 0.1967979786868250 | 0.1297511960567352 | 0.3084173689076068 | T | T | T |
| 0.2334072086009616 | 0.1711766338316306 | 0.5254712684482524 | T | T | T |
| 0.3881769188966671 | 0.1736498694622884 | 0.5103729709354179 | T | T | T |
| 0.4368586682873530 | 0.1265661222209462 | 0.2978613170952345 | T | T | T |
| 0.3179959480522349 | 0.1694282273476642 | 0.1715287457630801 | T | T | T |
| 0.5764921327252123 | 0.5553967774685410 | 0.3557014796786818 | T | T | T |
| 0.6918500282658212 | 0.5248670703595156 | 0.2035236569732930 | T | T | T |

**Structure files (CONTCAR) involved in this work:**

|                    |                    |                    |   |   |   |
|--------------------|--------------------|--------------------|---|---|---|
| 0.7145485114758482 | 0.5670390744073865 | 0.9873107319576648 | T | T | T |
| 0.8725769062774779 | 0.5715732462193025 | 0.9887602100332502 | T | T | T |
| 0.8121440352231520 | 0.5484648850867274 | 0.3463969163441021 | T | T | T |
| 0.5738452053730904 | 0.3277090729234292 | 0.3317891337574818 | T | T | T |
| 0.6951710836956153 | 0.3709801494078876 | 0.1932991279755011 | T | T | T |
| 0.7295773724806979 | 0.3258509739886232 | 0.9803403303911106 | T | T | T |
| 0.8841237238139643 | 0.3249479100182878 | 0.9928261416750445 | T | T | T |
| 0.9403820631842971 | 0.3737320644223021 | 0.1875844894869377 | T | T | T |
| 0.9200945284700290 | 0.4449289583872051 | 0.8618350403708154 | T | T | T |
| 0.7985327290466880 | 0.4710721393459356 | 0.7220673930756670 | T | T | T |
| 0.7732185094296542 | 0.4343791061773562 | 0.4973159278409939 | T | T | T |
| 0.6152175292474495 | 0.4290851086699327 | 0.4912484502692561 | T | T | T |
| 0.5671039464285086 | 0.4687496135682835 | 0.7043873423658487 | T | T | T |
| 0.6737034946173094 | 0.4462982182108348 | 0.8592044536686522 | T | T | T |
| 0.9206063804592073 | 0.6767130720072646 | 0.8317131565854460 | T | T | T |
| 0.7694452799705948 | 0.6682373505443163 | 0.4647331420891970 | T | T | T |
| 0.6144836875560382 | 0.6724403559554901 | 0.4873272393138888 | T | T | T |
| 0.5612577265335160 | 0.6268600225096825 | 0.6990133818017277 | T | T | T |
| 0.6722458864806463 | 0.6737004517630641 | 0.8291245642443763 | T | T | T |
| 0.5788747377011666 | 0.9439261215343849 | 0.3584882434866063 | T | T | T |
| 0.6990833173537967 | 0.9723250889805636 | 0.2149386958250576 | T | T | T |
| 0.7217805699535527 | 0.9373932266502191 | 0.9928269624204424 | T | T | T |
| 0.8820258712596492 | 0.9337668975065535 | 0.9950694273069738 | T | T | T |
| 0.9340091835235388 | 0.9695189102768198 | 0.2047872145854765 | T | T | T |
| 0.8238813607110763 | 0.9451888538992704 | 0.3538448124741230 | T | T | T |
| 0.5797980199774356 | 0.1727705895090124 | 0.3293948917143107 | T | T | T |
| 0.6986697206433994 | 0.1305227183451874 | 0.1927261310144070 | T | T | T |
| 0.7328135983472368 | 0.1698170864721189 | 0.9717578922648682 | T | T | T |
| 0.8874431978356122 | 0.1727519519217743 | 0.9834325661255064 | T | T | T |
| 0.9373993020502862 | 0.1275583017731483 | 0.1967324213312911 | T | T | T |
| 0.8212639398852072 | 0.1717792736885888 | 0.3289769491161499 | T | T | T |
| 0.9245667008763887 | 0.0539246685767158 | 0.8560181299454210 | T | T | T |
| 0.8037350840566003 | 0.0248966855791571 | 0.7085220029960054 | T | T | T |
| 0.7825917577362025 | 0.0647533752718339 | 0.4913216917542392 | T | T | T |
| 0.6222360289472372 | 0.0687098061939563 | 0.4901580198802936 | T | T | T |
| 0.5688355284693317 | 0.0312891739254558 | 0.6987290894262679 | T | T | T |
| 0.6802089115911567 | 0.0526666430408602 | 0.8474106973477481 | T | T | T |
| 0.9240874478629748 | 0.8290497510201105 | 0.8366537791961520 | T | T | T |
| 0.8035202598181465 | 0.8673926483165760 | 0.6952734087079384 | T | T | T |
| 0.7712589235442985 | 0.8256773346931298 | 0.4779674304750513 | T | T | T |
| 0.6163377675977517 | 0.8262450717971781 | 0.4915668114668387 | T | T | T |
| 0.5650906318720923 | 0.8744589456742180 | 0.6988735345124689 | T | T | T |
| 0.6796260486948046 | 0.8322999129206231 | 0.8333071290732500 | T | T | T |
| 0.4233209095219782 | 0.4445632899330773 | 0.6400626823495698 | T | T | T |
| 0.3037236558729619 | 0.4715324541916954 | 0.7865027020728371 | T | T | T |
| 0.2820208096027198 | 0.4367055302093127 | 0.0049543173828502 | T | T | T |
| 0.1242806517652733 | 0.4357225581833665 | 0.0099238974038331 | T | T | T |
| 0.0653320404468492 | 0.4698756129428779 | 0.8011511310345031 | T | T | T |
| 0.1771450956186199 | 0.4446244848247717 | 0.6543646625066900 | T | T | T |
| 0.4183751695786717 | 0.6727986867052285 | 0.6592855229659099 | T | T | T |
| 0.3023360336042867 | 0.6292661636146668 | 0.8023698817658648 | T | T | T |
| 0.2685079034119174 | 0.6706047512612561 | 0.0204731998828549 | T | T | T |
| 0.1144297326112188 | 0.6714238134164935 | 0.0072294565547943 | T | T | T |

**Structure files (CONTCAR) involved in this work:**

|                    |                    |                    |   |   |   |
|--------------------|--------------------|--------------------|---|---|---|
| 0.0634453214904373 | 0.6283686603680031 | 0.7965229564085929 | T | T | T |
| 0.1806663241651459 | 0.6684789307155106 | 0.6663472130030345 | T | T | T |
| 0.0756599958078825 | 0.5567707449655863 | 0.1473843443978257 | T | T | T |
| 0.1985189870652092 | 0.5266478220403351 | 0.2838454466231765 | T | T | T |
| 0.2198933123370803 | 0.5606287313538137 | 0.5105779126751782 | T | T | T |
| 0.3779024854952430 | 0.5662953916282653 | 0.5079882357971995 | T | T | T |
| 0.4293051337443624 | 0.5279690704793575 | 0.2980469640932282 | T | T | T |
| 0.3238978090262410 | 0.5528535220332401 | 0.1458937876239653 | T | T | T |
| 0.0859076381640201 | 0.3247544515608707 | 0.1579118604687106 | T | T | T |
| 0.1962483146724061 | 0.3686356610193474 | 0.3058830846952267 | T | T | T |
| 0.2318138432934900 | 0.3293452626588209 | 0.5251634418375896 | T | T | T |
| 0.3861929435951434 | 0.3272552526383550 | 0.5061793509713860 | T | T | T |
| 0.4322731924933439 | 0.3704771372896382 | 0.2923155441225398 | T | T | T |
| 0.3150924968596513 | 0.3279093520992127 | 0.1661016714474091 | T | T | T |
| 0.3582898600351793 | 0.0621755747418345 | 0.7173692933207837 | T | T | T |
| 0.3090235474610519 | 0.0644221920427534 | 0.8989123159472299 | T | T | T |
| 0.2028508424276386 | 0.0460639672732226 | 0.0163774736659763 | T | T | T |
| 0.0984884208043142 | 0.0688308632809331 | 0.8962933693712781 | T | T | T |
| 0.1045415350580980 | 0.0587862096687811 | 0.6990618035422277 | T | T | T |
| 0.2299316593427286 | 0.0340924217805088 | 0.7471127003491694 | T | T | T |
| 0.3609772554194829 | 0.8259539118268697 | 0.7490535144502162 | T | T | T |
| 0.3066947820007020 | 0.8436434307803129 | 0.9242531045264388 | T | T | T |
| 0.1901880711711947 | 0.8518269124028024 | 0.0164577746094451 | T | T | T |
| 0.0857568343430934 | 0.8307569567304636 | 0.8997926838575898 | T | T | T |
| 0.1055554318105921 | 0.8396164423309802 | 0.7043671131669829 | T | T | T |
| 0.2310959433125414 | 0.8530316873721659 | 0.7619754745038959 | T | T | T |
| 0.3224908689024788 | 0.9473821170685631 | 0.8021198895136854 | T | T | T |
| 0.0879388729057788 | 0.9500694160796455 | 0.8124114084134111 | T | T | T |
| 0.4320710196298637 | 0.1276633125519366 | 0.5856714035813445 | T | T | T |
| 0.4181355357289694 | 0.9960198002364118 | 0.5671811643695334 | T | T | T |
| 0.3967505777316016 | 0.8640294160306322 | 0.5661628714596585 | T | T | T |
| 0.1998835510359128 | 0.1303707961847658 | 0.6170279645562294 | T | T | T |
| 0.1835912090230336 | 0.0017017198904509 | 0.5660438973636240 | T | T | T |
| 0.1992154457300429 | 0.8677014676010099 | 0.5690891040846029 | T | T | T |
| 0.9898794144020814 | 0.0402457432761931 | 0.7873014696866351 | T | T | T |
| 0.9861359091787855 | 0.8671207171460316 | 0.7810609574840012 | T | T | T |
| 0.1442653932514644 | 0.9357710616400867 | 0.2170873142163163 | T | T | T |
| 0.1939777940378177 | 0.9330829672785500 | 0.3988173137130074 | T | T | T |
| 0.2994847929484715 | 0.9489380803625145 | 0.5188234554536689 | T | T | T |
| 0.4035248412168324 | 0.9291081666922050 | 0.3975346217337137 | T | T | T |
| 0.3979765918539763 | 0.9394909146369711 | 0.2006891364267716 | T | T | T |
| 0.2722822723457508 | 0.9653509920362461 | 0.2470940125774234 | T | T | T |
| 0.1422182364285934 | 0.1723028898207475 | 0.2460300097184843 | T | T | T |
| 0.1933351016384336 | 0.1554674978650415 | 0.4229458607556687 | T | T | T |
| 0.3108496635876448 | 0.1481357263060690 | 0.5121129675043276 | T | T | T |
| 0.4168635066820484 | 0.1683111469192049 | 0.3976716586750105 | T | T | T |
| 0.3957266235296918 | 0.1575162286013007 | 0.2031956783349812 | T | T | T |
| 0.2712413046953441 | 0.1430892435739477 | 0.2634568989462029 | T | T | T |
| 0.1782411162277792 | 0.0503822384503053 | 0.3033459174079149 | T | T | T |
| 0.4179870273422793 | 0.0479348094128994 | 0.3131864603203281 | T | T | T |
| 0.0681299383945007 | 0.8699886470492186 | 0.0886529319442436 | T | T | T |
| 0.0838276326941289 | 0.0004521431628292 | 0.0653017448652564 | T | T | T |
| 0.1066292389070967 | 0.1319345440649953 | 0.0650151891816255 | T | T | T |

**Structure files (CONTCAR) involved in this work:**

|                    |                    |                    |   |   |   |
|--------------------|--------------------|--------------------|---|---|---|
| 0.3025239652568422 | 0.8676289497847171 | 0.1189961569390328 | T | T | T |
| 0.3196933975922962 | 0.9955463527259863 | 0.0659845676407815 | T | T | T |
| 0.3011185223630783 | 0.1288121221031410 | 0.0695672946650216 | T | T | T |
| 0.5131255324344437 | 0.9542070803604401 | 0.2893436374470368 | T | T | T |
| 0.5167110154149210 | 0.1338738703166430 | 0.2779806999665262 | T | T | T |
| 0.6381228259808776 | 0.5593389493033009 | 0.2779121341317918 | T | T | T |
| 0.7008606164539767 | 0.5729373158707839 | 0.1068750680348633 | T | T | T |
| 0.7935083419304619 | 0.5587903114553016 | 0.9618191359396102 | T | T | T |
| 0.8847994483837175 | 0.5771014986397676 | 0.1067416442993296 | T | T | T |
| 0.8893991116848220 | 0.5314289706321147 | 0.3195792376704290 | T | T | T |
| 0.7629624914423393 | 0.5201894067518085 | 0.2626155140485268 | T | T | T |
| 0.6415383084778853 | 0.3355577150886245 | 0.2679532890110864 | T | T | T |
| 0.6908695080845415 | 0.3321880638029767 | 0.0861893172991637 | T | T | T |
| 0.8069565757771036 | 0.3508034117637467 | 0.9907515709508483 | T | T | T |
| 0.9101978398109981 | 0.3196204667706061 | 0.1081964119947045 | T | T | T |
| 0.9087710471174045 | 0.3569729978389540 | 0.3005123314241163 | T | T | T |
| 0.7690521070651172 | 0.3674443012559740 | 0.2388996880699782 | T | T | T |
| 0.6707245001070756 | 0.4488131947053090 | 0.1748358262172653 | T | T | T |
| 0.9213567023563629 | 0.4477917613578455 | 0.1553622984996834 | T | T | T |
| 0.5694415033876065 | 0.6272174232157471 | 0.4123039746899113 | T | T | T |
| 0.5882542361029270 | 0.4978501246566872 | 0.4402578984535239 | T | T | T |
| 0.5805269306866739 | 0.3641093738120750 | 0.4406610545923221 | T | T | T |
| 0.8012250484382911 | 0.6281568031517368 | 0.3692260552879057 | T | T | T |
| 0.7957038455576297 | 0.5119816402068101 | 0.4578954813475920 | T | T | T |
| 0.8202504480369033 | 0.3819408065810240 | 0.4388197484583062 | T | T | T |
| 0.0105099097751317 | 0.5509152054188218 | 0.2156973133526728 | T | T | T |
| 0.0206044167806463 | 0.3634994521510918 | 0.1999217457460297 | T | T | T |
| 0.8557163352963100 | 0.4345163471424078 | 0.7879570052449884 | T | T | T |
| 0.7893895170600671 | 0.4319628690629884 | 0.6155981713512644 | T | T | T |
| 0.6955937230079741 | 0.4238450997059025 | 0.4720844771994837 | T | T | T |
| 0.5999209781225575 | 0.4288960860466393 | 0.6098411100402719 | T | T | T |
| 0.6004615858306456 | 0.4424464955660755 | 0.8076322862806424 | T | T | T |
| 0.7268920774524305 | 0.4726716441136654 | 0.7757673528963890 | T | T | T |
| 0.8606527579403062 | 0.6798321483102702 | 0.7530651533730764 | T | T | T |
| 0.8134709768127343 | 0.6436954441397985 | 0.5632565174852548 | T | T | T |
| 0.6921794128030653 | 0.6463638754054686 | 0.4831479512461306 | T | T | T |
| 0.5865381991567322 | 0.6666872407135183 | 0.6000408304082754 | T | T | T |
| 0.5941023318970545 | 0.6610187294279976 | 0.7976607122169634 | T | T | T |
| 0.7186669266117224 | 0.6486822016300614 | 0.7378361277445245 | T | T | T |
| 0.8221626136418524 | 0.5482240308123384 | 0.6963793190816723 | T | T | T |
| 0.5820647730829531 | 0.5482533077590946 | 0.6892268066817744 | T | T | T |
| 0.9296758951683967 | 0.3766111169626125 | 0.9273503125685831 | T | T | T |
| 0.9129090084588275 | 0.5092383422863082 | 0.9345881034643865 | T | T | T |
| 0.8986129140315008 | 0.6401667929148767 | 0.9350949424714229 | T | T | T |
| 0.6929748368020010 | 0.3715564376746952 | 0.8963757019868830 | T | T | T |
| 0.6740900231740492 | 0.5002742003000703 | 0.9498740334271527 | T | T | T |
| 0.6863422285699834 | 0.6340150778404060 | 0.9334437420815220 | T | T | T |
| 0.4876354277579070 | 0.4532808357960968 | 0.7124939543411725 | T | T | T |
| 0.4804621574015586 | 0.6319567418979722 | 0.7083969417204452 | T | T | T |
| 0.6440979156645731 | 0.9377707481072406 | 0.2874464178446315 | T | T | T |
| 0.6994107985545817 | 0.9328508161388149 | 0.1089822288246013 | T | T | T |
| 0.8022466955983790 | 0.9452062510674378 | 0.9821832567959791 | T | T | T |
| 0.9021351696977441 | 0.9275420079757417 | 0.1120395874837560 | T | T | T |

**Structure files (CONTCAR) involved in this work:**

|                    |                    |                    |   |   |   |
|--------------------|--------------------|--------------------|---|---|---|
| 0.8991471245390235 | 0.9470964151979917 | 0.3090410378609482 | T | T | T |
| 0.7725499595488046 | 0.9656779736731859 | 0.2649838868340899 | T | T | T |
| 0.6421925915731003 | 0.1727380989361778 | 0.2525374569087458 | T | T | T |
| 0.6960940066649979 | 0.1547985410721982 | 0.0773354861202852 | T | T | T |
| 0.8105234546043749 | 0.1461894888189450 | 0.9802527245460566 | T | T | T |
| 0.9153186807233717 | 0.1679529450174080 | 0.0967330745260968 | T | T | T |
| 0.8979841601963421 | 0.1558535158505159 | 0.2937494696636297 | T | T | T |
| 0.7720791523098685 | 0.1437313108229122 | 0.2401566980052898 | T | T | T |
| 0.6804724079095267 | 0.0509794604845523 | 0.1993111852415761 | T | T | T |
| 0.9210579943446884 | 0.0484489232596446 | 0.1816800141059479 | T | T | T |
| 0.5708344796636085 | 0.8746095509327102 | 0.4218760184885758 | T | T | T |
| 0.5841987895940096 | 0.0061766793267982 | 0.4366645601707179 | T | T | T |
| 0.6011672411764249 | 0.1379942471598837 | 0.4345948479552204 | T | T | T |
| 0.8097191296748290 | 0.8695363716801997 | 0.3941925754773428 | T | T | T |
| 0.8177074565381495 | 0.9976403011705814 | 0.4460533680375827 | T | T | T |
| 0.8065039658588955 | 0.1314810075696246 | 0.4328084959843085 | T | T | T |
| 0.0132691416244015 | 0.9540899469229935 | 0.2175634285372268 | T | T | T |
| 0.0171734882335063 | 0.1376493589530565 | 0.2145662633275177 | T | T | T |
| 0.8588417803028660 | 0.0537614066563732 | 0.7857110635681206 | T | T | T |
| 0.8046880697672729 | 0.0706951156150182 | 0.6079593548378887 | T | T | T |
| 0.7020422770748904 | 0.0562968462668609 | 0.4817671100149288 | T | T | T |
| 0.5993810658076808 | 0.0748061923375304 | 0.6062649537093894 | T | T | T |
| 0.6047313119703228 | 0.0510515466614715 | 0.8033378642137640 | T | T | T |
| 0.7301000530378106 | 0.0283346345009283 | 0.7588036179391877 | T | T | T |
| 0.8595956970942313 | 0.8325917781073007 | 0.7642846679253656 | T | T | T |
| 0.8066800957478725 | 0.8313849396189062 | 0.5864933082375908 | T | T | T |
| 0.6940281874783489 | 0.8507412883907371 | 0.4860579167864434 | T | T | T |
| 0.5905099212803743 | 0.8279685722851868 | 0.6063941930271852 | T | T | T |
| 0.6038641724449468 | 0.8526119678752572 | 0.8004103596612124 | T | T | T |
| 0.7299788827730938 | 0.8563921551829192 | 0.7441954252292861 | T | T | T |
| 0.8194943579065123 | 0.9468808990752686 | 0.6815722834394182 | T | T | T |
| 0.5806980243540980 | 0.9524099789206807 | 0.6720702623253506 | T | T | T |
| 0.9324764235178566 | 0.1271896687985170 | 0.9086222807266235 | T | T | T |
| 0.9201903767599149 | 0.9970506698653615 | 0.9432655142338571 | T | T | T |
| 0.9057882577935988 | 0.8645182360505618 | 0.9424325872716413 | T | T | T |
| 0.6968682661186750 | 0.1288182248671083 | 0.8820744996333277 | T | T | T |
| 0.6861729873224429 | 0.0027797089573109 | 0.9430902965801429 | T | T | T |
| 0.6981630603489486 | 0.8689561671117191 | 0.9378463591474588 | T | T | T |
| 0.4898729391548508 | 0.0467061172288711 | 0.7147832719928072 | T | T | T |
| 0.4853926276892675 | 0.8640865911559344 | 0.7161218356358744 | T | T | T |
| 0.3560266334223476 | 0.4394455594925900 | 0.7072915311272673 | T | T | T |
| 0.3074512103020517 | 0.4289526020973819 | 0.8900700058085664 | T | T | T |
| 0.2030317869832270 | 0.4558427717024988 | 0.0078768736250504 | T | T | T |
| 0.0954037972260473 | 0.4302759347631502 | 0.8967435062948617 | T | T | T |
| 0.1008841723530300 | 0.4440088177216210 | 0.6979571818574842 | T | T | T |
| 0.2279804522437419 | 0.4669686601775565 | 0.7427444320950064 | T | T | T |
| 0.3555506639064948 | 0.6700643908860259 | 0.7351079826656044 | T | T | T |
| 0.3055296332428309 | 0.6605340516616578 | 0.9137128150901963 | T | T | T |
| 0.1915858313552479 | 0.6453221777579373 | 0.0105775649832548 | T | T | T |
| 0.0885196007793111 | 0.6712588995661798 | 0.8923227593325433 | T | T | T |
| 0.1030205744456664 | 0.6546777093092221 | 0.6971051666799689 | T | T | T |
| 0.2278411776646044 | 0.6382614307130646 | 0.7550743292582340 | T | T | T |
| 0.3219278459803853 | 0.5500216923157167 | 0.8059992260789780 | T | T | T |

**Structure files (CONTCAR) involved in this work:**

|                    |                    |                    |   |   |   |
|--------------------|--------------------|--------------------|---|---|---|
| 0.0801511942952100 | 0.5493846232001209 | 0.8148941513014006 | T | T | T |
| 0.4320422022382567 | 0.3762262882844900 | 0.5747362032705320 | T | T | T |
| 0.4212144992847436 | 0.5081575338994839 | 0.5634263450411180 | T | T | T |
| 0.3968648462059869 | 0.6394688921705475 | 0.5530021092869517 | T | T | T |
| 0.1952261544695725 | 0.3697327673947048 | 0.6151854689847409 | T | T | T |
| 0.1805683897095615 | 0.4975067289699667 | 0.5614469162401983 | T | T | T |
| 0.1961935768619363 | 0.6309669439119062 | 0.5606900290516021 | T | T | T |
| 0.9854259733291468 | 0.4549899640748777 | 0.7889096137372290 | T | T | T |
| 0.9837845869624315 | 0.6370482463870335 | 0.7792644202075659 | T | T | T |
| 0.1429036315014314 | 0.5643886180909758 | 0.2166809085039109 | T | T | T |
| 0.2015751169325263 | 0.5633598276148640 | 0.3925781014271381 | T | T | T |
| 0.2994129760366258 | 0.5494510730850461 | 0.5269771060065467 | T | T | T |
| 0.3948366786848790 | 0.5684966361682696 | 0.3899562269797389 | T | T | T |
| 0.3983671297176096 | 0.5549921642074475 | 0.1935625057992363 | T | T | T |
| 0.2716074783667294 | 0.5300017471409113 | 0.2326256378182629 | T | T | T |
| 0.1412396644955694 | 0.3248782710905553 | 0.2463681203935422 | T | T | T |
| 0.1926279928432637 | 0.3454514388301175 | 0.4217044997249882 | T | T | T |
| 0.3090757792333633 | 0.3534599910269680 | 0.5134989650043674 | T | T | T |
| 0.4104188728748321 | 0.3276824913102502 | 0.3905365313191732 | T | T | T |
| 0.3927227653719476 | 0.3429971016926027 | 0.1942674512341053 | T | T | T |
| 0.2700435026030706 | 0.3547336660067759 | 0.2597964663035134 | T | T | T |
| 0.1773929754922553 | 0.4480478709279688 | 0.2979223887101293 | T | T | T |
| 0.4135933184730265 | 0.4485766985463965 | 0.3130627121289465 | T | T | T |
| 0.0692418269661811 | 0.6228821031397039 | 0.0760187499444313 | T | T | T |
| 0.0838299992903688 | 0.4912233270226180 | 0.0740669529211436 | T | T | T |
| 0.1155542579224376 | 0.3616193882173225 | 0.0592508142931049 | T | T | T |
| 0.3061861980130037 | 0.6273098229541821 | 0.1058041121094606 | T | T | T |
| 0.3233072107218777 | 0.4981552911487276 | 0.0557679999992803 | T | T | T |
| 0.2949842817105878 | 0.3663339486948100 | 0.0633302191163845 | T | T | T |
| 0.5090322682791850 | 0.5405264521229916 | 0.2934761725379275 | T | T | T |
| 0.5117187432856397 | 0.3617058230793423 | 0.2711234465528717 | T | T | T |
| 0.4396280189711137 | 0.7499683404649059 | 0.6385894698851284 | T | T | T |
| 0.1949103242012021 | 0.7478421608747264 | 0.6503008670080119 | T | T | T |
| 0.2720420613448767 | 0.7485606761560760 | 0.0538481441159269 | T | T | T |
| 0.1094712946824660 | 0.7476078207058605 | 0.0497143926363388 | T | T | T |
| 0.0668161138281598 | 0.2481898911297103 | 0.1295082405965800 | T | T | T |
| 0.3036920380307979 | 0.2482169787865932 | 0.1492198344861624 | T | T | T |
| 0.2280502693197122 | 0.2503508229605582 | 0.5521034168358491 | T | T | T |
| 0.3925743503999860 | 0.2510638325472768 | 0.5480880839049317 | T | T | T |
| 0.5581448103552514 | 0.2493871849910412 | 0.3535709199367313 | T | T | T |
| 0.8116339507013136 | 0.2502350174177088 | 0.3480988735980954 | T | T | T |
| 0.7272750380092058 | 0.2486011543065970 | 0.9425575061934114 | T | T | T |
| 0.8909301640352808 | 0.2501984077359579 | 0.9449687350876428 | T | T | T |
| 0.9453676036200334 | 0.7523142322452430 | 0.8600653184964372 | T | T | T |
| 0.6846904948911009 | 0.7526193758711053 | 0.8524862735260904 | T | T | T |
| 0.7757735659655371 | 0.7474541762395668 | 0.4432661471140907 | T | T | T |
| 0.6104546011404687 | 0.7498028997781715 | 0.4502270341356772 | T | T | T |
| 0.9246946453721004 | 0.4851420301725979 | 0.5442185031320222 | T | T | T |
| 0.8221437268485660 | 0.3338345265485434 | 0.3266551157030776 | T | T | T |
| 0.7982410426688082 | 0.6356773131946346 | 0.6976572016255218 | T | T | T |
| 0.9272791293690903 | 0.5302264584824414 | 0.1955361565865636 | T | T | T |
| 0.9257434943267071 | 0.4278191150325856 | 0.4156633512043056 | T | T | T |
| 0.8634321022949409 | 0.5567262597011023 | 0.5594904110741357 | T | T | T |



**Structure files (CONTCAR) involved in this work:**

|                    |                    |                    |   |   |   |
|--------------------|--------------------|--------------------|---|---|---|
| 0.0068071525676454 | 0.5587807044350815 | 0.4100350759054046 | T | T | T |
| 0.0450632050099404 | 0.5252145083866955 | 0.5219979826960294 | T | T | T |
| 0.9593199970101035 | 0.4766567660618454 | 0.5938594305587921 | T | T | T |
| 0.0904113696017939 | 0.5356566574611100 | 0.4099562909636538 | T | T | T |
| 0.0465098467457738 | 0.4103128887501348 | 0.4474711853693292 | T | T | T |
| 0.0323695487547439 | 0.4459205336088979 | 0.3230833392044918 | T | T | T |
| 0.0413680133019466 | 0.5210771076003173 | 0.4406069153523278 | T | T | T |
| 0.0257382994116286 | 0.4524194778510792 | 0.4037716779516793 | T | T | T |
